# Supplementary material for: Long-read transcriptome sequencing of CLL and MDS patients uncovers molecular effects of SF3B1 mutations
Source: HighWire-hosted journal article supplement (doi:10.1101/gr.279327.124), 2024-09-13
Supplement: Supplemental_Table_S1.xlsx [file Supplemental_Table_S1.xlsx]

## Sheet: IsoSeq
name	Source	accession id / file name	group	total reads	nonchimeric (flnc) reads	chimeric reads	Mapping rate	phenotype	genotype	platform	SF3B1 mut	SF3B1 allel frequency
K01	cell line	SRR26750181	K562_wt	697716	694647	314	0.968596	K562	wt	S2
K02	cell line	SRR26750180	K562_wt	572466	525087	540	0.974554	K562	wt	S2
K03	cell line	SRR26750193	K562_mut	879075	874809	880	0.970807	K562	mut	S2	p.Lys700Glu	41
K04	cell line	SRR26750192	K562_mut	798652	795126	709	0.969954	K562	mut	S2	p.Lys700Glu	45
N01	cell line	SRR26750191	Nalm6_wt	548086	545784	151	0.973971	Nalm6	wt	S2
N02	cell line	SRR26750190	Nalm6_wt	362796	355818	63	0.974162	Nalm6	wt	S2
N03	cell line	SRR26750189	Nalm6_mut	692104	635575	640	0.975202	Nalm6	mut	S2	p.His662Gln	28
N04	cell line	SRR26750188	Nalm6_mut	865522	859604	154	0.978685	Nalm6	mut	S2	p.His662Gln	29
C01	patient	25-10_flnc_aligned.bam	CLL_wt	680797	676483	954	0.975198	CLL	wt	S2
C02	patient	25-11_flnc_aligned.bam	CLL_wt	462823	460625	306	0.975191	CLL	wt	S2
C03	patient	25-12_flnc_aligned.bam	CLL_wt	575429	570121	339	0.958024	CLL	wt	S2
C04	patient	25-13_flnc_aligned.bam	CLL_wt	943920	937127	3432	0.96458	CLL	wt	S2
C05	patient	25-14_flnc_aligned.bam	CLL_wt	972115	967167	1642	0.960014	CLL	wt	S2
C06	patient	25-15_flnc_aligned.bam	CLL_wt	1000160	996139	1015	0.972665	CLL	wt	S2
C07	patient	25-17_flnc_aligned.bam	CLL_wt	1031151	1064700	5187	0.972461	CLL	wt	S2	p.Ala284Thr	49
C08	patient	25-21_flnc_aligned.bam	CLL_wt	547745	544983	301	0.977464	CLL	wt	S2
C09	patient	25-22_flnc_aligned.bam	CLL_wt	672136	626050	4382	0.967263	CLL	wt	S2
C10	patient	25-23_flnc_aligned.bam	CLL_wt	1241003	1234822	967	0.972364	CLL	wt	S2
C11	patient	25-24_flnc_aligned.bam	CLL_wt	1083413	1025874	1015	0.958849	CLL	wt	S2			The sample was regrouped to WT based on PC and non-hotspot mutation
C12	patient	25-9_flnc_aligned.bam	CLL_mut	540978	538240	656	0.975735	CLL	mut	S2	p.His662Gln	52
C13	patient	25-16_flnc_aligned.bam	CLL_mut	843519	839510	814	0.973392	CLL	mut	S2	p.Ile704Phe	49
C14	patient	25-18_flnc_aligned.bam	CLL_mut	1265004	1258653	3178	0.968804	CLL	mut	S2	p.Gly742Asp	43
C15	patient	25-20_flnc_aligned.bam	CLL_mut	1088457	1081322	2308	0.965379	CLL	mut	S2	p.Asn626Tyr	48
C16	patient	25-25_flnc_aligned.bam	CLL_mut	750837	747055	374	0.972124	CLL	mut	S2	p.Lys700Glu	41
C17	patient	25-26_flnc_aligned.bam	CLL_mut	625056	609458	389	0.974967	CLL	mut	S2	p.Ile704Asn,p.Asp894Gly	51
C18	patient	25-27_flnc_aligned.bam	CLL_mut	1057070	1003027	4050	0.943303	CLL	mut	S2	p.Gln699Glu	48
C19	patient	25-28_flnc_aligned.bam	CLL_mut	657441	652984	521	0.919103	CLL	mut	S2	p.Tyr623Cys	47
M01	patient	25-31_flnc_aligned.bam	MDS_wt	375862	373547	228	0.97751	MDS	wt	S2
M02	patient	25-35_flnc_aligned.bam	MDS_wt	191016	190378	26	0.972782	MDS	wt	S2
M03	patient	25-37_flnc_aligned.bam	MDS_wt	756953	751197	2683	0.969932	MDS	wt	S2
M04	patient	25-39_flnc_aligned.bam	MDS_wt	1041573	1029774	4509	0.965592	MDS	wt	S2
M05	patient	25-41_flnc_aligned.bam	MDS_wt	228890	227648	67	0.966635	MDS	wt	S2
M06	patient	25-43_flnc_aligned.bam	MDS_wt	882469	876550	1427	0.959228	MDS	wt	S2
M07	patient	25-45_flnc_aligned.bam	MDS_wt	246834	245079	97	0.932157	MDS	wt	S2
M08	patient	25-49_flnc_aligned.bam	MDS_wt	292110	290952	101	0.979121	MDS	wt	S2
M09	patient	25-50_flnc_aligned.bam	MDS_wt	159377	211303	30	0.968339	MDS	wt	S2
M10	patient	25-52_flnc_aligned.bam	MDS_wt	207206	158705	12	0.947072	MDS	wt	S2
M11	patient	25-54_flnc_aligned.bam	MDS_wt	198602	201690	299	0.966214	MDS	wt	S2
M12	patient	25-29_flnc_aligned.bam	MDS_mut	832464	197660	54	0.973852	MDS	mut	S2	p.Asp781Gly	46
M13	patient	25-30_flnc_aligned.bam	MDS_mut	552843	811591	4678	0.971674	MDS	mut	S2	p.Arg625Cys	45
M14	patient	25-32_flnc_aligned.bam	MDS_mut	791606	546710	674	0.979446	MDS	mut	S2	p.Lys700Glu	23
M15	patient	25-34_flnc_aligned.bam	MDS_mut	261685	784034	1976	0.948079	MDS	mut	S2	p.Lys700Glu	45
M16	patient	25-36_flnc_aligned.bam	MDS_mut	434664	259351	131	0.972639	MDS	mut	S2			Based on RNA-seq "Chr2:197402110 T>C p.Lys700Glu" (38%)
M17	patient	25-38_flnc_aligned.bam	MDS_mut	520822	432535	320	0.971967	MDS	mut	S2	p.Lys700Glu	37
M18	patient	25-40_flnc_aligned.bam	MDS_mut	418446	517465	284	0.963183	MDS	mut	S2	p.Lys700Glu	41
M19	patient	25-42_flnc_aligned.bam	MDS_mut	155001	413961	2355	0.970742	MDS	mut	S2	p.Lys666Thr	46
M20	patient	25-44_flnc_aligned.bam	MDS_mut	328865	154266	29	0.965828	MDS	mut	S2	p.Lys700Glu	47
M21	patient	25-46_flnc_aligned.bam	MDS_mut	672980	327190	144	0.976858	MDS	mut	S2	p.Lys700Glu	33
M22	patient	25-47_flnc_aligned.bam	MDS_mut	767152	655687	1143	0.971847	MDS	mut	S2	p.His662Gln	50
M23	patient	25-48_flnc_aligned.bam	MDS_mut	212188	757486	1491	0.970111	MDS	mut	S2	p.Lys700Glu	14
M24	patient	25-51_flnc_aligned.bam	MDS_mut	340549	339774	16	0.960655	MDS	mut	S2	p.Lys700Glu	50
M25	patient	25-53_flnc_aligned.bam	MDS_mut	694510	690500	396	0.981969	MDS	mut	S2	p.Lys700Glu	48
B01	human	25-56_flnc_aligned.bam	B-cell	148792	147830	38	0.95655	healthy	wt	S2
B02	human	25-60_flnc_aligned.bam	B-cell	401887	392617	338	0.938654	healthy	wt	S2
B03	human	25-61_flnc_aligned.bam	B-cell	146312	145690	71	0.964104	healthy	wt	S2
B04	human	25-62_flnc_aligned.bam	B-cell	208711	207063	69	0.961971	healthy	wt	S2
B05	human	25-63_flnc_aligned.bam	B-cell	205931	204481	142	0.931938	healthy	wt	S2
B06	human	25-64_flnc_aligned.bam	B-cell	101821	100302	233	0.966343	healthy	wt	S2

## Sheet: RNA-seq
IsoSeq short name	Group	MRS# or SRA accession	Source	SF3B1 status	IGHV status	SEX	Age	treated
C01	CLL_wt	MRS621	human	control	Unmutated	Male	50	not
C02	CLL_wt	MRS611	human	control	Unmutated	Male	68	yes
C03	CLL_wt	MRS614	human	control	Unmutated	Male	65	yes
C04	CLL_wt	MRS613	human	control	Unmutated	Male	70	yes
C05	CLL_wt	MRS636	human	control	Unmutated	Male	47	yes
C06	CLL_wt	MRS616	human	control	Mutated	Male	57	yes
C07	CLL_wt	MRS633	human	control	Mutated	Male	48	yes
C08	CLL_wt	MRS630	human	control	Mutated	Female	57	not
C09	CLL_wt	MRS626	human	control	Mutated	Male	60	yes
C10	CLL_wt	MRS618	human	control	Mutated	Male	64	yes
C11	CLL_wt	MRS627	human	mutated	Unmutated	Male	68	yes	The sample was regrouped to WT based on PC and non-hotspot mutation
C12	CLL_mut	MRS612	human	mutated	Unmutated	Male	52	yes
C13	CLL_mut	MRS635	human	mutated	Unmutated	Male	59	yes
C14	CLL_mut	MRS620	human	mutated	Mutated	Male	49	yes
C15	CLL_mut	MRS629	human	mutated	Unmutated	Male	66	yes
C16	CLL_mut	MRS615	human	mutated	Mutated	Male	64	yes
C17	CLL_mut	MRS632	human	mutated	Unmutated	Male	49	not
C18	CLL_mut	MRS625	human	mutated	Unmutated	Male	75	yes
C19	CLL_mut	MRS634	human	mutated	Unmutated	Male	73	not
	CLL_wt	MRS617	human	control	Unmutated	Male	67	not
	CLL_wt	MRS619	human	control	Unmutated	Female	76	yes
	CLL_mut	MRS622	human	mutated	Unmutated	Male	60	not
	CLL_mut	MRS623	human	mutated	Unmutated	Male	57	not
	CLL_wt	MRS624	human	control	Unmutated	Male	74	not
	CLL_wt	MRS631	human	control	Unmutated	Male	64	yes
	CLL_mut	MRS637	human	mutated	Unmutated	Male	64	yes
	CLL_mut	MRS628	human	mutated	Mutated	Female	74
K1	K562_wt	SRR26750195	K562	control
K2	K562_wt	SRR26750194	K562	control
K3	K562_mut	SRR26750187	K562	mutated
K4	K562_mut	SRR26750186	K562	mutated
N1	Nalm6_wt	SRR26750185	Nalm6	control
N2	Nalm6_wt	SRR26750184	Nalm6	control
N3	Nalm6_mut	SRR26750183	Nalm6	mutated
N4	Nalm6_mut	SRR26750182	Nalm6	mutated

## Sheet: Cell lines iCLIP
#K562 cells
SF3B1 status	Replicate	#reads	#uniquelly mapped reads	# crosslink events
wt/wt	1	70207835	47070636	28711869
wt/wt	2	58639101	37846480	20679517
wt/wt	3	71344391	47995395	30222832
K700E/wt	1	49318773	32414319	19005395
K700E/wt	2	41485012	25528759	13892358

## Sheet: MDS public RNA-seq
Sample description from SRA																									Information based on own analyses (Pacholewska et al.)
RunID	BioProject	BioSample	Instrument	sex	Tissue	Cell_type	Age	Isolate	PATIENT_ID	TREATMENT	PHENOTYPE	disease_stage	Individual	Karyotype	Batch	SAMPLE_TYPE	response_to_treatment	genotype.variation	Mutation	matched	treatment_stage	who_subtype	SF3B1_status_submitter	Genotype	SF3B1_mutation_authors_this_paper	ref_cov	mut_cov	mut_fraction	strandness	RevRatio	Total.Sequences	Sequence.length	X.GC	total_deduplicated_percentage	avg_sequence_length	total_reads	avg_input_read_length	uniquely_mapped	uniquely_mapped_percent	avg_mapped_read_length	num_splices	num_annotated_splices	num_GTAG_splices	num_GCAG_splices	num_ATAC_splices	num_noncanonical_splices	mismatch_rate	deletion_rate	deletion_length
ERR3465212	PRJEB33840	SAMEA5843750	Illumina HiSeq 2000	male	Blast cell	blast cell	NA				CD34-positive		110ANA		1		CR							NA		NA	NA	NA	unstranded	0.553051	79774723	35-76	44	49.4639	75.4851	79774723	150	67654060	84.81	149.68	26276224	25934574	26057731	181409	22380	14704	0.42	0.01	1.4
ERR3465213	PRJEB33840	SAMEA5843751	Illumina HiSeq 2000	male	Blast cell	blast cell	NA				CD34-positive		25AMI		2		FAIL							NA		NA	NA	NA	unstranded	0.568174	22943143	151	48	47.6883	151	22943143	302	17482686	76.2	294.21	18165680	17791588	18014619	121383	15734	13944	0.43	0.01	1.52
ERR3465217	PRJEB33840	SAMEA5843755	Illumina HiSeq 2000	male	Blast cell	blast cell	NA				CD34-positive		25LAC		2		FAIL							NA		NA	NA	NA	unstranded	0.564885	20543964	151	47	51.1496	151	20543964	302	14993091	72.98	293.61	13765563	13557243	13646305	95511	13520	10227	0.44	0.01	1.51
ERR3465223	PRJEB33840	SAMEA5843761	Illumina HiSeq 2000	male	Blast cell	blast cell	NA				CD34-positive		25NIK		2		FAIL							NA		NA	NA	NA	unstranded	0.567477	27211709	151	44	29.1856	151	27211709	302	17829550	65.52	293.34	16512362	16135428	16366580	112808	15200	17774	0.45	0.02	1.54
ERR3465232	PRJEB33840	SAMEA5843770	Illumina HiSeq 2000	male	Blast cell	blast cell	NA				CD34-positive		30NIK		2		CR							NA		NA	NA	NA	unstranded	0.563707	20898578	151	44	49.1688	151	20898578	302	13679611	65.46	292.43	12899233	12640848	12794075	84358	12159	8641	0.41	0.01	1.55
ERR3465235	PRJEB33840	SAMEA5843773	Illumina HiSeq 2000	male	Blast cell	blast cell	NA				CD34-positive		30VOG		2		FAIL							NA		NA	NA	NA	unstranded	0.562345	21219736	151	47	55.1042	151	21219736	302	15213188	71.69	293.42	12203332	11936901	12101539	83366	9354	9073	0.39	0.02	1.57
ERR3465237	PRJEB33840	SAMEA5843775	Illumina HiSeq 2000	male	Blast cell	blast cell	NA				CD34-positive		35MPO		2		CR							NA		NA	NA	NA	unstranded	0.566342	30426897	151	46	54.9589	151	30426897	302	22150971	72.8	293.8	18498208	18023841	18335404	138266	12129	12409	0.36	0.01	1.56
ERR3465247	PRJEB33840	SAMEA5843785	Illumina HiSeq 2000	female	Blast cell	blast cell	NA				CD34-positive		45MAR		1									NA		NA	NA	NA	unstranded	0.54773	64838072	35-76	42	47.9347	75.5046	64838072	150	54340029	83.81	149.16	21951386	21549783	21777426	146783	15544	11633	0.47	0.01	1.42
ERR3465258	PRJEB33840	SAMEA5843796	Illumina HiSeq 2000	female	Blast cell	blast cell	NA				CD34-positive		60SOY		1		CR							NA		NA	NA	NA	unstranded	0.541764	75601670	35-76	36	43.7103	75.5145	75601670	151	56253257	74.41	149.63	15132662	14848018	15004557	107087	11796	9222	0.55	0.01	1.43
ERR3465277	PRJEB33840	SAMEA5843815	Illumina HiSeq 2000	female	Blast cell	blast cell	NA				CD34-positive		85PAR		1									NA	K666N	1569	1365	47	unstranded	0.544672	99982364	35-76	40	44.4803	75.5084	99982364	151	81264701	81.28	149.35	30240736	29849759	29973564	228709	23777	14686	0.59	0.01	1.41
ERR3465278	PRJEB33840	SAMEA5843816	Illumina HiSeq 2000	male	Blast cell	blast cell	NA				CD34-positive		90KON		1		CR							NA		NA	NA	NA	unstranded	0.54802	61357001	35-76	38	49.9143	75.5171	61357001	150	47422152	77.29	149.48	15176588	14984984	15047984	107428	11454	9722	0.46	0.01	1.45
SRR10555303	PRJNA592354	SAMN13422832	Illumina HiSeq 2500		peripheral blood	peripheral blood	NA								NA					yes				NA		NA	NA	NA	unstranded	0.549817	27651518	101	46	59.0051	101	27651518	202	22100481	79.93	198.93	11530496	11341416	11432478	82224	9713	6081	0.41	0.02	1.48
SRR10555315	PRJNA592354	SAMN13422826	Illumina HiSeq 2500		peripheral blood	peripheral blood	NA								NA					no				NA		NA	NA	NA	unstranded	0.55296	10736426	101	48	57.4806	101	10736426	202	8349913	77.77	198.51	5201137	5053814	5159913	34329	5138	1757	0.43	0.03	1.47
SRR10555317	PRJNA592354	SAMN13422825	Illumina HiSeq 2500		peripheral blood	peripheral blood	NA								NA					no				NA	K700E	242	183	43	unstranded	0.553743	21406345	101	45	64.256	101	21406345	202	17820895	83.25	199.18	10013650	9847765	9926637	71727	9298	5988	0.43	0.02	1.49
SRR10555319	PRJNA592354	SAMN13422824	Illumina HiSeq 2500		peripheral blood	peripheral blood	NA								NA					no				NA		NA	NA	NA	unstranded	0.555776	31194266	101	46	49.8113	101	31194266	202	25859845	82.9	198.86	17384400	17146383	17245636	118456	13759	6549	0.36	0.01	1.44
SRR10555321	PRJNA592354	SAMN13422823	Illumina HiSeq 2500		peripheral blood	peripheral blood	NA								NA					no				NA		NA	NA	NA	unstranded	0.561136	18853622	101	46	66.6382	101	18853622	202	16015195	84.94	199.19	9017597	8879225	8938266	64649	8523	6159	0.39	0.02	1.45
SRR10555323	PRJNA592354	SAMN13422822	Illumina HiSeq 2500		peripheral blood	peripheral blood	NA								NA					yes				NA		NA	NA	NA	unstranded	0.567116	17155255	101	48	59.6058	101	17155255	202	13976841	81.47	199.14	8603505	8489787	8533688	57735	7913	4169	0.45	0.02	1.44
SRR10555333	PRJNA592354	SAMN13422817	Illumina HiSeq 2500		peripheral blood	peripheral blood	NA								NA					yes				NA		NA	NA	NA	unstranded	0.550286	29190146	101	46	50.2046	101	29190146	202	23798652	81.53	198.79	15746558	15571305	15630661	98118	13193	4586	0.43	0.02	1.46
SRR10555340	PRJNA592354	SAMN13422813	Illumina HiSeq 2500		peripheral blood	peripheral blood	NA								NA					no				NA		NA	NA	NA	unstranded	0.563978	5675206	101	47	67.3035	101	5675206	202	4513472	79.53	198.63	2415113	2362570	2395195	16374	2222	1322	0.44	0.02	1.45
SRR10555342	PRJNA592354	SAMN13422812	Illumina HiSeq 2500		peripheral blood	peripheral blood	NA								NA					yes				NA	E622D	59	67	53	unstranded	0.566326	13330068	101	47	57.5863	101	13330068	202	10815417	81.14	199.03	7941182	7843920	7881456	50083	6873	2770	0.43	0.02	1.46
SRR10555346	PRJNA592354	SAMN13422834	Illumina HiSeq 2500		peripheral blood	peripheral blood	NA								NA					yes				NA		NA	NA	NA	unstranded	0.546105	16367710	101	48	49.0721	101	16367710	202	12181496	74.42	198.66	6602283	6470953	6557751	37708	4368	2456	0.46	0.02	1.44
SRR12366650	PRJNA650236	SAMN15699812	NextSeq 500	female	bone marrow	bone marrow	41	bone marrow MNC		azacitidine (AZA)		MDS-EB-1		45\,-X\,t(X;9;14)(q25;q34;q11.2)[20]	NA	tissue sample								NA		NA	NA	NA	stranded > 0.65	1.0438	18201983	76	51	37.1784	76	18201983	152	12980878	71.32	151.14	6738581	6661878	6689334	42515	4362	2370	0.34	0.01	1.52
SRR12366651	PRJNA650236	SAMN15699811	NextSeq 500	male	bone marrow	bone marrow	53	bone marrow MNC		azacitidine (AZA)		MDS-EB-1		46\,XY\,+1\,der(1;15)(q10;q10)[20]	NA	tissue sample								NA		NA	NA	NA	stranded > 0.65	1.04214	16800238	76	51	48.8915	76	16800238	152	14215204	84.61	151.3	7209954	7103318	7156353	46020	4968	2613	0.28	0.01	1.66
SRR12366652	PRJNA650236	SAMN15699802	NextSeq 500	male	bone marrow	bone marrow	68	bone marrow MNC		azacitidine (AZA)		MDS-EB-2		46\,XY\,t(1;3)(p36.1;q21)[18]/46\,XY[2]	NA	tissue sample								NA	K666T	72	55	43	stranded > 0.65	1.04411	15128710	76	47	47.6423	76	15128710	152	13502121	89.25	151.02	5634260	5556113	5587332	40944	3766	2218	0.44	0.01	1.5
SRR12366653	PRJNA650236	SAMN15699801	NextSeq 500	male	bone marrow	bone marrow	63	bone marrow MNC		azacitidine (AZA)		MDS-EB-2		46\,XY[20]	NA	tissue sample								NA		NA	NA	NA	stranded > 0.65	1.0478	15616110	76	49	57.2025	76	15616110	152	13739318	87.98	150.97	6014221	5931005	5964011	43561	4361	2288	0.5	0.01	1.64
SRR12366654	PRJNA650236	SAMN15699810	NextSeq 500	male	bone marrow	bone marrow	75	bone marrow MNC		azacitidine (AZA)		MDS-EB-2		46\,XY[20]	NA	tissue sample								NA		NA	NA	NA	stranded > 0.65	1.05132	20229020	76	51	34.5973	76	20229020	152	17017161	84.12	151.32	8621045	8514417	8556314	56639	4975	3117	0.27	0.01	1.56
SRR12366655	PRJNA650236	SAMN15699809	NextSeq 500	male	bone marrow	bone marrow	55	bone marrow MNC		azacitidine (AZA)		MDS-EB-2		46\,XY[20]	NA	tissue sample								NA		NA	NA	NA	stranded > 0.65	1.04659	18430007	76	52	32.5413	76	18430007	152	14942754	81.08	151.2	8932440	8824135	8869024	54222	6075	3119	0.3	0.01	1.76
SRR12366656	PRJNA650236	SAMN15699808	NextSeq 500	male	bone marrow	bone marrow	66	bone marrow MNC		azacitidine (AZA)		MDS-EB-2		47\,XY\,+8[20]	NA	tissue sample								NA		NA	NA	NA	stranded > 0.65	1.04848	16339614	76	50	48.1219	76	16339614	152	14394449	88.1	151.13	7525375	7449523	7466808	50956	5019	2592	0.42	0.01	1.5
SRR12366657	PRJNA650236	SAMN15699807	NextSeq 500	male	bone marrow	bone marrow	71	bone marrow MNC		azacitidine (AZA)		MDS-EB-2		46\,XY[20]	NA	tissue sample								NA	K666T	131	21	14	stranded > 0.65	1.04846	21643011	76	51	27.1167	76	21643011	152	18740642	86.59	151.25	8329455	8207634	8266464	53707	4864	4420	0.29	0.01	1.7
SRR12366658	PRJNA650236	SAMN15699806	NextSeq 500	female	bone marrow	bone marrow	71	bone marrow MNC		azacitidine (AZA)		MDS-EB-1		46\,XX[20]	NA	tissue sample								NA		NA	NA	NA	stranded > 0.65	1.03937	18271618	76	50	48.507	76	18271618	152	15217084	83.28	151.19	8233860	8109154	8173192	52003	5570	3095	0.33	0.01	1.69
SRR12366659	PRJNA650236	SAMN15699805	NextSeq 500	female	bone marrow	bone marrow	59	bone marrow MNC		azacitidine (AZA)		MDS-EB-2		46\,XX[20]	NA	tissue sample								NA		NA	NA	NA	stranded > 0.65	1.04336	18985164	76	51	47.4051	76	18985164	152	15532820	81.82	151.22	7453412	7329694	7395463	49143	5603	3203	0.31	0.01	1.52
SRR12366660	PRJNA650236	SAMN15699804	NextSeq 500	male	bone marrow	bone marrow	65	bone marrow MNC		azacitidine (AZA)		MDS-EB-1		46\,XY\,del(5)(q22)\,del(9)(q13)\,del(11)(q23)\,add(18)(q23)[6]/46\,XY[3]	NA	tissue sample								NA		NA	NA	NA	stranded > 0.65	1.05302	17776946	76	50	45.9388	76	17776946	152	15204545	85.53	151.29	7989189	7881202	7927520	52854	5653	3162	0.3	0.01	1.5
SRR12366661	PRJNA650236	SAMN15699823	NextSeq 500	male	bone marrow	bone marrow	64	bone marrow MNC		azacitidine (AZA)		MDS-EB-2		46\,XY[20]	NA	tissue sample								NA	R625H	179	131	42	stranded > 0.65	1.04873	18585459	76	50	52.5057	76	18585459	152	16557050	89.09	151.32	8287021	8177147	8220475	57169	6136	3241	0.29	0.01	1.55
SRR12366662	PRJNA650236	SAMN15699822	NextSeq 500	male	bone marrow	bone marrow	62	bone marrow MNC		azacitidine (AZA)		MDS-EB-1		45\,X\,-Y[2]/46\,XY[18]	NA	tissue sample								NA		NA	NA	NA	stranded > 0.65	1.05438	17719583	76	50	44.4033	76	17719583	152	15200154	85.78	151.25	8509560	8408329	8444376	55128	6541	3515	0.3	0.01	1.6
SRR12366663	PRJNA650236	SAMN15699821	NextSeq 500	male	bone marrow	bone marrow	71	bone marrow MNC		azacitidine (AZA)		MDS-EB-1		46\,XY[20]	NA	tissue sample								NA		NA	NA	NA	stranded > 0.65	1.03979	16190393	76	48	43.786	76	16190393	152	14297877	88.31	151.04	5604232	5523387	5558151	39986	3728	2367	0.43	0.01	1.44
SRR12366664	PRJNA650236	SAMN15699803	NextSeq 500	female	bone marrow	bone marrow	55	bone marrow MNC		azacitidine (AZA)		MDS-EB-1		46\,XX\,t(7;11)(p15;p15)[20]	NA	tissue sample								NA		NA	NA	NA	stranded > 0.65	1.05519	18631161	76	51	46.5416	76	18631161	152	16081173	86.31	151.35	8579478	8464719	8514229	56604	5355	3290	0.27	0.01	1.57
SRR12366665	PRJNA650236	SAMN15699820	NextSeq 500	male	bone marrow	bone marrow	52	bone marrow MNC		azacitidine (AZA)		MDS-EB-2		46\,XY[20]	NA	tissue sample								NA		NA	NA	NA	stranded > 0.65	1.04392	19080255	76	50	53.7221	76	19080255	152	16754802	87.81	151.24	8200365	8086322	8135194	55786	5703	3682	0.32	0.01	1.62
SRR12366666	PRJNA650236	SAMN15699819	NextSeq 500	male	bone marrow	bone marrow	42	bone marrow MNC		azacitidine (AZA)		MDS-EB-2		46\,XY[20]	NA	tissue sample								NA		NA	NA	NA	stranded > 0.65	1.04173	18558584	76	50	44.007	76	18558584	152	15898985	85.67	151.34	8349040	8262499	8283832	56680	5407	3121	0.28	0.01	1.47
SRR12366667	PRJNA650236	SAMN15699818	NextSeq 500	female	bone marrow	bone marrow	38	bone marrow MNC		azacitidine (AZA)		MDS-EB-2		46\,XX\,del(20)(q11.2q13.1)[7]/46\,idem\,del(12)(p11.2p12)[9]/46\,XX[4]	NA	tissue sample								NA		NA	NA	NA	stranded > 0.65	1.04638	18507543	76	49	56.7886	76	18507543	152	16127198	87.14	151.06	6964940	6873511	6908631	49484	4423	2402	0.44	0.01	1.53
SRR12366668	PRJNA650236	SAMN15699817	NextSeq 500	male	bone marrow	bone marrow	67	bone marrow MNC		azacitidine (AZA)		MDS-EB-1		46\,XY\,t(11;19)(q23;p13.1)[14]/45\,idem\,dic(11;17)(p15;p13)[1]/46\,XY[5]	NA	tissue sample								NA		NA	NA	NA	stranded > 0.65	1.04475	17345194	76	47	56.9764	76	17345194	152	15614940	90.02	151.09	5698568	5618256	5651702	40107	4168	2591	0.42	0.01	1.63
SRR12366669	PRJNA650236	SAMN15699816	NextSeq 500	male	bone marrow	bone marrow	73	bone marrow MNC		azacitidine (AZA)		MDS-EB-2		46\,XY[20]	NA	tissue sample								NA		NA	NA	NA	stranded > 0.65	1.03901	17337645	76	47	56.884	76	17337645	152	14925738	86.09	151	5981979	5886659	5934327	41344	3999	2309	0.45	0.01	1.6
SRR12366670	PRJNA650236	SAMN15699815	NextSeq 500	male	bone marrow	bone marrow	77	bone marrow MNC		azacitidine (AZA)		MDS-EB-1		47\,XY\,+8[20]	NA	tissue sample								NA		NA	NA	NA	stranded > 0.65	1.04368	17298676	76	47	51.7524	76	17298676	152	15342156	88.69	151.06	5446377	5364496	5400043	40046	3847	2441	0.44	0.01	1.54
SRR12366671	PRJNA650236	SAMN15699814	NextSeq 500	male	bone marrow	bone marrow	59	bone marrow MNC		azacitidine (AZA)		MDS-EB-2		46\,XY[20]	NA	tissue sample								NA		NA	NA	NA	stranded > 0.65	1.04605	17345473	76	50	51.4371	76	17345473	152	15182693	87.53	151.25	7424157	7332796	7367267	48831	5128	2931	0.31	0.01	1.61
SRR12366672	PRJNA650236	SAMN15699813	NextSeq 500	female	bone marrow	bone marrow	68	bone marrow MNC		azacitidine (AZA)		MDS-EB-2		46\,XX\,del(20)(q11.2)[20]	NA	tissue sample								NA		NA	NA	NA	stranded > 0.65	1.03643	19054629	76	50	48.4137	76	19054629	152	16500706	86.6	151.22	6835273	6724223	6782506	45492	4557	2718	0.33	0.01	1.58
SRR13425454	PRJNA679200	SAMN16492365	Illumina HiSeq 2500	male	bone marrow	CD34+	63	v1		before azacitidine		MDS-EB2			NA									NA		NA	NA	NA	stranded > 0.65	0.902647	104842563	35-126	48	60.7966	119.011	104842563	238	92602609	88.33	237.23	34554880	34075357	34263040	234391	29236	28213	0.23	0.02	1.86
SRR13425463	PRJNA679200	SAMN16492390	Illumina HiSeq 2500	male	bone marrow	CD34+	65	v26		before azacitidine		MDS-EB2			NA									NA		NA	NA	NA	stranded > 0.65	0.851266	75927361	35-126	48	61.2923	117.187	75927361	235	67023439	88.27	233.95	27424372	27074725	27199765	187229	19000	18378	0.26	0.01	1.76
SRR13425464	PRJNA679200	SAMN16492389	Illumina HiSeq 2500	female	bone marrow	CD34+	63	v25		before azacitidine		MDS-EB2			NA									NA		NA	NA	NA	stranded > 0.65	0.807288	83692286	35-126	46	69.1736	118.367	83692286	237	72221831	86.29	236.21	20389743	20059151	20211034	141824	18061	18824	0.28	0.01	1.81
SRR13425465	PRJNA679200	SAMN16492388	Illumina HiSeq 2500	female	bone marrow	CD34+	73	v24		before azacitidine		MDS-EB2			NA									NA		NA	NA	NA	stranded > 0.65	0.899231	86870281	35-126	51	58.7341	114.783	86870281	230	73010620	84.05	228.8	24845343	24453733	24623303	180192	20633	21215	0.29	0.01	1.82
SRR13425466	PRJNA679200	SAMN16492387	Illumina HiSeq 2500	female	bone marrow	CD34+	74	v23		before azacitidine		MDS-EB2			NA									NA	R625H	511	476	48	stranded > 0.65	0.958881	84267719	35-126	48	53.8248	118.52	84267719	237	74832773	88.8	236.89	35931474	35454472	35636114	241591	30633	23136	0.26	0.01	1.72
SRR13425467	PRJNA679200	SAMN16492386	Illumina HiSeq 2500	female	bone marrow	CD34+	82	v22		before azacitidine		MDS-EB1			NA									NA		NA	NA	NA	stranded > 0.65	0.929287	82037900	35-126	48	60.5043	118.481	82037900	237	70707833	86.19	236.69	19258919	18937095	19082474	139188	15439	21818	0.28	0.02	1.89
SRR13425470	PRJNA679200	SAMN16492384	Illumina HiSeq 2500	male	bone marrow	CD34+	67	v20		before azacitidine		MDS-EB2			NA									NA	K700E	301	200	40	stranded > 0.65	0.934422	102929805	35-126	48	54.928	117.082	102929805	234	87678505	85.18	233.88	25853825	25363076	25623876	181542	21199	27208	0.22	0.02	1.82
SRR13425471	PRJNA679200	SAMN16492383	Illumina HiSeq 2500	female	bone marrow	CD34+	78	v19		before azacitidine		MDS-EB2			NA									NA		NA	NA	NA	stranded > 0.65	0.924636	74131636	35-126	48	59.0459	117.009	74131636	234	64724584	87.31	233.69	21584615	21274357	21393937	152322	18098	20258	0.21	0.01	1.77
SRR13425472	PRJNA679200	SAMN16492382	Illumina HiSeq 2500	female	bone marrow	CD34+	75	v18		before azacitidine		MDS-MLD			NA									NA	K700E	239	217	48	stranded > 0.65	0.940369	67720453	35-126	48	54.8144	119.085	67720453	238	60090712	88.73	237.87	30045238	29713451	29803856	196532	26391	18459	0.2	0.01	1.73
SRR13425473	PRJNA679200	SAMN16492381	Illumina HiSeq 2500	male	bone marrow	CD34+	81	v17		before azacitidine		MDS-EB2			NA									NA	Y623H	481	513	52	stranded > 0.65	0.927623	90996634	35-126	49	52.0373	120.119	90996634	240	79187614	87.02	239.66	37602334	37142445	37303254	246390	30842	21848	0.2	0.01	1.8
SRR13425475	PRJNA679200	SAMN16492379	Illumina HiSeq 2500	female	bone marrow	CD34+	64	v15		before azacitidine		MDS-EB2			NA									NA	R625C	463	460	50	stranded > 0.65	0.866796	84175231	35-126	49	53.818	117.779	84175231	236	72238185	85.82	235.16	34111661	33639212	33842978	221971	25872	20840	0.25	0.01	1.75
SRR13425477	PRJNA679200	SAMN16492377	Illumina HiSeq 2500	male	bone marrow	CD34+	68	v13		before azacitidine		MDS-EB2			NA									NA		NA	NA	NA	stranded > 0.65	0.976345	94215664	35-126	54	43.1019	119.638	94215664	239	52579420	55.81	238.45	13315627	13039963	13195071	93802	11007	15747	0.29	0.02	1.89
SRR13425478	PRJNA679200	SAMN16492376	Illumina HiSeq 2500	male	bone marrow	CD34+	67	v12		before azacitidine		MDS-EB2			NA									NA		NA	NA	NA	stranded > 0.65	0.89904	61849796	35-126	47	62.034	116.873	61849796	234	53775128	86.94	233.69	16634221	16370664	16490595	115573	11967	16086	0.23	0.02	1.84
SRR13425479	PRJNA679200	SAMN16492375	Illumina HiSeq 2500	male	bone marrow	CD34+	65	v11		before azacitidine		MDS-EB2			NA									NA		NA	NA	NA	stranded > 0.65	0.900416	74402866	35-126	74	21.0166	116.647	74402866	234	18369724	24.69	228.07	3616422	3484993	3583894	26926	2089	3513	0.42	0.02	2.12
SRR13425483	PRJNA679200	SAMN16492372	Illumina HiSeq 2500	female	bone marrow	CD34+	73	v8		before azacitidine		MDS-EB2			NA									NA		NA	NA	NA	stranded > 0.65	0.842331	61049209	35-126	45	66.8044	116.805	61049209	234	52276938	85.63	233.1	6313845	6168453	6242009	48137	5375	18324	0.29	0.02	1.97
SRR13425484	PRJNA679200	SAMN16492371	Illumina HiSeq 2500	female	bone marrow	CD34+	68	v7		before azacitidine		MDS-EB2			NA									NA	K700E	190	174	48	stranded > 0.65	0.899441	68783524	35-126	47	62.6482	120.563	68783524	241	59855202	87.02	240.77	16612524	16321209	16467295	115200	12452	17577	0.23	0.01	1.83
SRR13425485	PRJNA679200	SAMN16492370	Illumina HiSeq 2500	female	bone marrow	CD34+	64	v6		before azacitidine		MDS-EB2			NA									NA		NA	NA	NA	stranded > 0.65	0.943257	85754908	35-126	47	58.7315	119.594	85754908	240	75704031	88.28	238.76	28466470	28093029	28227749	195246	21955	21520	0.27	0.01	1.77
SRR13425486	PRJNA679200	SAMN16492369	Illumina HiSeq 2500	male	bone marrow	CD34+	69	v5		before azacitidine		MDS-EB2			NA									NA		NA	NA	NA	stranded > 0.65	0.957647	76077428	35-126	49	50.7249	119.114	76077428	238	66377784	87.25	237.93	35619331	35195281	35332256	238928	27971	20176	0.24	0.01	1.74
SRR13425487	PRJNA679200	SAMN16492368	Illumina HiSeq 2500	male	bone marrow	CD34+	44	v4		before azacitidine		MDS-EB2			NA									NA		NA	NA	NA	stranded > 0.65	0.937368	76535779	35-126	47	59.674	118.609	76535779	237	67887186	88.7	236.88	25957103	25631454	25733504	180701	22670	20228	0.27	0.01	1.77
SRR13425488	PRJNA679200	SAMN16492367	Illumina HiSeq 2500	female	bone marrow	CD34+	70	v3		before azacitidine		MDS-EB2			NA									NA		NA	NA	NA	stranded > 0.65	0.907558	79655658	35-126	49	51.916	120.23	79655658	241	69165553	86.83	240.27	33510024	33116712	33244095	219191	25566	21172	0.26	0.01	1.78
SRR1660308	PRJNA268220	SAMN03216813	Illumina HiSeq 2000		CD34+	bone marrow CD34+ cells	NA								NA									NA	K700E	151	169	53	unstranded	0.559577	90916117	100	49	17.0082	100	90916117	200	65876240	72.46	197.82	34030541	33657762	33758994	228505	27604	15438	0.51	0.01	1.71
SRR1660309	PRJNA268220	SAMN03216817	Illumina HiSeq 2000		CD34+	bone marrow CD34+ cells	NA								NA									NA	K700E	269	292	52	unstranded	0.558537	120511602	100	49	18.4988	100	120511602	200	93937921	77.95	197.96	55423731	54830878	55030068	335415	37543	20705	0.49	0.01	1.68
SRR1660310	PRJNA268220	SAMN03216811	Illumina HiSeq 2000		CD34+	bone marrow CD34+ cells	NA								NA									NA	R625L	360	317	47	stranded > 0.65	1.04627	80435209	100	47	11.9486	100	80435209	200	63754705	79.26	198.77	40772577	40337298	40477124	246228	25287	23938	0.22	0.01	1.6
SRR1660311	PRJNA268220	SAMN03216801	Illumina HiSeq 2000		CD34+	bone marrow CD34+ cells	NA								NA									NA	K700E	328	303	48	stranded > 0.65	1.04434	51745026	100	47	32.7114	100	51745026	200	46560249	89.98	198.89	29322969	29046653	29092806	190987	24753	14423	0.22	0.01	1.65
SRR1660312	PRJNA268220	SAMN03216810	Illumina HiSeq 2000		CD34+	bone marrow CD34+ cells	NA								NA									NA	E622D	549	523	49	stranded > 0.65	1.04381	76855397	100	46	18.827	100	76855397	200	67498169	87.82	198.84	40602291	40137839	40284993	260786	31248	25264	0.22	0.01	1.61
SRR1660313	PRJNA268220	SAMN03216803	Illumina HiSeq 2000		CD34+	bone marrow CD34+ cells	NA								NA									NA	K700E	310	270	47	stranded > 0.65	1.04431	49130394	100	47	32.9188	100	49130394	200	44056024	89.67	198.86	25498012	25203434	25289997	170467	21877	15671	0.22	0.01	1.69
SRR1660314	PRJNA268220	SAMN03216805	Illumina HiSeq 2000		CD34+	bone marrow CD34+ cells	NA								NA									NA	H662Q	164	133	45	stranded > 0.65	1.04839	34148078	100	47	38.4037	100	34148078	200	30503931	89.33	198.89	19272666	19087257	19119570	128196	16281	8619	0.21	0.01	1.62
SRR1660315	PRJNA268220	SAMN03216814	Illumina HiSeq 2000		CD34+	bone marrow CD34+ cells	NA								NA									NA	K666R	322	327	50	stranded > 0.65	1.04242	63801701	100	46	28.3503	100	63801701	200	56525569	88.6	198.85	34636592	34282928	34371191	220928	25612	18861	0.22	0.01	1.67
SRR1660316	PRJNA268220	SAMN03216807	Illumina HiSeq 2000		CD34+	bone marrow CD34+ cells	NA								NA									NA		NA	NA	NA	unstranded	0.563012	36336879	100	52	17.5657	100	36336879	200	24059003	66.21	197.78	12984873	12822032	12894887	75627	8171	6188	0.48	0.01	1.76
SRR1660317	PRJNA268220	SAMN03216804	Illumina HiSeq 2000		CD34+	bone marrow CD34+ cells	NA								NA									NA		NA	NA	NA	stranded > 0.65	1.03894	65807103	100	46	32.044	100	65807103	200	58413353	88.76	198.84	30509298	30179807	30266636	199499	23991	19172	0.22	0.01	1.68
SRR1660318	PRJNA268220	SAMN03216806	Illumina HiSeq 2000		CD34+	bone marrow CD34+ cells	NA								NA									NA		NA	NA	NA	stranded > 0.65	1.03963	86003307	100	46	13.5861	100	86003307	200	74834800	87.01	198.77	40184875	39731419	39862510	264581	27599	30185	0.22	0.01	1.65
SRR1660319	PRJNA268220	SAMN03216802	Illumina HiSeq 2000		CD34+	bone marrow CD34+ cells	NA								NA									NA		NA	NA	NA	stranded > 0.65	1.04161	47410741	100	46	26.5853	100	47410741	200	40835948	86.13	198.88	21146074	20854203	20972831	142013	15127	16103	0.22	0.01	1.66
SRR1691633	PRJNA269142	SAMN03251983	Illumina HiSeq 2000	male	bone marrow	bone marrow	59								NA									NA		NA	NA	NA	unstranded	0.554158	68549315	100	50	37.4711	100	68549315	200	59512678	86.82	198.78	42439918	41386572	42153049	254721	15625	16523	0.22	0.01	1.64
SRR1691634	PRJNA269142	SAMN03251979	Illumina HiSeq 2000	male	bone marrow	bone marrow	81								NA									NA		NA	NA	NA	unstranded	0.556657	65777635	100	49	35.1191	100	65777635	200	57921084	88.06	198.84	45807277	45125692	45516666	252232	22823	15556	0.22	0.01	1.59
SRR1691635	PRJNA269142	SAMN03251982	Illumina HiSeq 2000	male	bone marrow	bone marrow	70								NA									NA		NA	NA	NA	unstranded	0.55517	68822459	100	49	38.5887	100	68822459	200	60505937	87.92	198.7	42688368	42048012	42421206	232922	19841	14399	0.22	0.01	1.63
SRR1691636	PRJNA269142	SAMN03251980	Illumina HiSeq 2000	male	bone marrow	bone marrow	74								NA									NA		NA	NA	NA	unstranded	0.552204	79263018	100	49	38.936	100	79263018	200	69383895	87.54	198.61	43668420	42604431	43397096	240975	15810	14539	0.24	0.01	1.64
SRR1691637	PRJNA269142	SAMN03251981	Illumina HiSeq 2000	male	bone marrow	bone marrow	72								NA									NA		NA	NA	NA	unstranded	0.555872	65780601	100	49	36.8209	100	65780601	200	58584824	89.06	198.68	41902079	40886255	41633132	239273	15821	13853	0.22	0.01	1.57
SRR1691638	PRJNA269142	SAMN03251997	Illumina HiSeq 2000	male	bone marrow	bone marrow	74								NA									NA		NA	NA	NA	unstranded	0.553467	65918921	100	48	42.7435	100	65918921	200	57866333	87.78	198.68	37274309	36504998	37029561	215272	17373	12103	0.23	0.01	1.6
SRR1691639	PRJNA269142	SAMN03251991	Illumina HiSeq 2000	male	bone marrow	bone marrow	62								NA									NA		NA	NA	NA	unstranded	0.550501	81928806	100	49	38.4879	100	81928806	200	71167128	86.86	198.56	48270286	47219204	47955243	282568	17354	15121	0.31	0.01	1.64
SRR1691640	PRJNA269142	SAMN03251995	Illumina HiSeq 2000	male	bone marrow	bone marrow	72								NA									NA		NA	NA	NA	unstranded	0.54541	66723482	100	49	38.4908	100	66723482	200	57958666	86.86	198.61	39096476	38027837	38853242	215794	13603	13837	0.27	0.01	1.62
SRR1691641	PRJNA269142	SAMN03251990	Illumina HiSeq 2000	male	bone marrow	bone marrow	50								NA									NA		NA	NA	NA	unstranded	0.55416	92086842	99	51	32.7334	99	92086842	198	80566390	87.49	196.66	58367868	57752727	57987561	317805	42869	19633	0.26	0.01	1.58
SRR1691642	PRJNA269142	SAMN03251986	Illumina HiSeq 2000	male	bone marrow	bone marrow	76								NA									NA		NA	NA	NA	unstranded	0.559258	76214625	99	50	35.3393	99	76214625	198	65411696	85.83	196.62	49441927	48739893	49116064	277104	32251	16508	0.25	0.01	1.65
SRR1691643	PRJNA269142	SAMN03251998	Illumina HiSeq 2000	female	bone marrow	bone marrow	65								NA									NA		NA	NA	NA	unstranded	0.551786	61668892	99	50	38.2594	99	61668892	198	53690457	87.06	196.68	38066196	37238239	37805128	221348	24150	15570	0.25	0.01	1.59
SRR1691644	PRJNA269142	SAMN03251984	Illumina HiSeq 2000	male	bone marrow	bone marrow	71								NA									NA		NA	NA	NA	unstranded	0.552787	82172308	100	50	34.8349	100	82172308	200	72025011	87.65	198.64	52339637	51279772	51999926	288410	32322	18979	0.26	0.01	1.64
SRR17831316	PRJNA797993	SAMN25042724	Illumina NovaSeq 6000	female	bone marrow	bone marrow	54	v10				MDS-del(5q)			NA									NA		NA	NA	NA	stranded > 0.65	1.02018	55285879	20-101	48	63.7681	97.7687	55285879	196	48697504	88.08	196.47	15189626	14997105	15057315	108013	13556	10742	0.21	0.01	1.74
SRR17831317	PRJNA797993	SAMN25042723	Illumina NovaSeq 6000	male	bone marrow	bone marrow	79	v9				MDS-MLD			NA									NA		NA	NA	NA	stranded > 0.65	0.851922	85319352	20-101	52	55.8322	95.9941	85319352	193	70047805	82.1	193.19	20174059	19838342	20003873	138263	16904	15019	0.23	0.01	1.88
SRR17831318	PRJNA797993	SAMN25042722	Illumina NovaSeq 6000	female	bone marrow	bone marrow	43	v8				MDS-RS			NA									NA		NA	NA	NA	stranded > 0.65	0.889533	55862423	20-151	51	55.5835	135.109	55862423	270	47560756	85.14	270.99	22542661	22234774	22347404	157601	19570	18086	0.2	0.01	1.9
SRR17831319	PRJNA797993	SAMN25042721	Illumina NovaSeq 6000	male	bone marrow	bone marrow	78	v7				MDS-RS			NA									NA	K700E	287	213	43	stranded > 0.65	0.859689	113861685	20-101	53	47.9991	96.2274	113861685	193	91643216	80.49	193.8	37196724	36772768	36904479	240024	30288	21933	0.21	0.01	1.8
SRR17831320	PRJNA797993	SAMN25042720	Illumina NovaSeq 6000	male	bone marrow	bone marrow	68	v6				MDS-MLD			NA									NA		NA	NA	NA	stranded > 0.65	1.02948	62853841	20-101	49	58.6836	98.1034	62853841	197	55731356	88.67	196.95	20702607	20442008	20529622	142688	17674	12623	0.21	0.01	1.73
SRR17831322	PRJNA797993	SAMN25042719	Illumina NovaSeq 6000	male	bone marrow	bone marrow	62	v5				MDS-RS			NA									NA	H662Q	223	171	43	stranded > 0.65	0.95596	101860349	20-101	52	50.582	96.5485	101860349	194	82673900	81.16	194.14	26819983	26416594	26596703	179331	22688	21261	0.21	0.01	1.84
SRR17831325	PRJNA797993	SAMN25042752	Illumina NovaSeq 6000	male	bone marrow	bone marrow	75	v38				MDS-EB-1			NA									NA	K666E	218	175	45	stranded > 0.65	0.855066	90522306	20-101	50	64.8231	96.3433	90522306	193	76837272	84.88	193.74	23146802	22799224	22962940	151505	16450	15907	0.23	0.01	1.8
SRR17831326	PRJNA797993	SAMN25042751	Illumina HiSeq 2500	male	bone marrow	bone marrow	54	v37				MDS-EB-2			NA									NA		NA	NA	NA	stranded > 0.65	0.850454	76729469	20-126	48	64.462	114.576	76729469	227	68560306	89.35	227.18	25254436	24914388	25046568	169972	19716	18180	0.19	0.01	1.74
SRR17831327	PRJNA797993	SAMN25042750	Illumina HiSeq 2500	female	bone marrow	bone marrow	72	v36				MDS-MLD			NA									NA	K666N	255	178	41	stranded > 0.65	0.926034	68158737	20-126	49	57.217	116.666	68158737	232	60174171	88.29	232.19	26104898	25770654	25879945	180777	25749	18427	0.15	0.01	1.74
SRR17831328	PRJNA797993	SAMN25042749	Illumina NovaSeq 6000	female	bone marrow	bone marrow	63	v35				MDS-EB-1			NA									NA	T432S	1499	1259	46	stranded > 0.65	1.01603	NA	NA	NA	NA	NA	363390361	196	330158154	90.85	196.57	96165298	94828531	95353718	643304	70231	98045	0.2	0.01	1.7
SRR17831329	PRJNA797993	SAMN25042748	Illumina NovaSeq 6000	male	bone marrow	bone marrow	58	v34				MDS-EB-1			NA									NA		NA	NA	NA	stranded > 0.65	1.02185	62184706	20-101	46	57.0316	97.8553	62184706	196	55350378	89.01	196.56	20849010	20652095	20674835	143853	17385	12937	0.21	0.01	1.69
SRR17831330	PRJNA797993	SAMN25042747	Illumina NovaSeq 6000	female	bone marrow	bone marrow	59	v33				MDS-MLD			NA									NA	K700E	195	158	45	stranded > 0.65	1.02558	57033205	20-101	48	64.7713	97.965	57033205	197	51416035	90.15	196.77	18330280	18126065	18178948	125011	14870	11451	0.21	0.01	1.71
SRR17831331	PRJNA797993	SAMN25042746	Illumina NovaSeq 6000	male	bone marrow	bone marrow	62	v32				MDS-MLD			NA									NA		NA	NA	NA	stranded > 0.65	1.01422	72076107	20-101	48	63.2055	97.8554	72076107	196	64279999	89.18	196.44	17417740	17199073	17270750	119277	13442	14271	0.22	0.01	1.73
SRR17831332	PRJNA797993	SAMN25042745	Illumina NovaSeq 6000	female	bone marrow	bone marrow	39	v31				MDS-MLD			NA									NA		NA	NA	NA	stranded > 0.65	0.967129	57558179	20-101	47	69.3911	97.7265	57558179	196	51729476	89.87	196.19	14024409	13848011	13902518	94918	12186	14787	0.24	0.02	1.74
SRR17831333	PRJNA797993	SAMN25042718	Illumina HiSeq 2500	male	bone marrow	bone marrow	77	v4				MDS-EB-1			NA									NA	K666N	75	53	41	stranded > 0.65	0.925391	66599342	20-126	48	68.567	114.79	66599342	228	57470229	86.29	227.39	10835702	10612295	10733081	79945	7184	15492	0.2	0.02	1.96
SRR17831334	PRJNA797993	SAMN25042744	Illumina NovaSeq 6000	female	bone marrow	bone marrow	77	v30				MDS-SLD			NA									NA		NA	NA	NA	stranded > 0.65	0.970487	62614043	20-101	49	57.5253	98.0679	62614043	197	54148169	86.48	196.94	21543069	21358397	21369671	139879	18521	14998	0.21	0.01	1.74
SRR17831335	PRJNA797993	SAMN25042743	Illumina NovaSeq 6000	male	bone marrow	bone marrow	77	v29				MDS-SLD			NA									NA		NA	NA	NA	stranded > 0.65	1.01464	66417504	20-101	48	59.0386	97.7301	66417504	196	57715859	86.9	196.38	19580396	19388696	19416845	133307	15746	14498	0.23	0.01	1.71
SRR17831336	PRJNA797993	SAMN25042742	Illumina NovaSeq 6000	male	bone marrow	bone marrow	68	v28				MDS-MLD			NA									NA		NA	NA	NA	stranded > 0.65	1.02446	61765636	20-101	49	52.4763	97.7533	61765636	196	53047043	85.88	196.47	18995190	18824044	18844342	127795	11319	11734	0.22	0.01	1.67
SRR17831337	PRJNA797993	SAMN25042741	Illumina NovaSeq 6000	male	bone marrow	bone marrow	62	v27				MDS-RS			NA									NA	K700E	161	85	35	stranded > 0.65	0.837069	101817044	20-101	51	42.0355	96.9924	101817044	195	57529899	56.5	194.34	17924651	17714022	17779691	117086	15126	12748	0.22	0.01	1.81
SRR17831338	PRJNA797993	SAMN25042740	Illumina NovaSeq 6000	female	bone marrow	bone marrow	28	v26				MDS-SLD			NA									NA		NA	NA	NA	stranded > 0.65	0.856107	99076663	20-101	53	43.7811	96.0152	99076663	193	80283498	81.03	193.45	32194842	31847127	31938235	208520	27424	20663	0.21	0.01	1.79
SRR17831339	PRJNA797993	SAMN25042739	Illumina NovaSeq 6000	male	peripheral blood	peripheral blood	71	v25				MDS-EB-2			NA									NA	K666T	228	195	46	stranded > 0.65	1.02455	89954619	20-101	48	49.9137	97.8613	89954619	197	79846824	88.76	196.68	31016736	30657453	30771877	204125	21654	19080	0.2	0.01	1.69
SRR17831340	PRJNA797993	SAMN25042738	Illumina NovaSeq 6000	female	bone marrow	bone marrow	36	v24				MDS-MLD			NA									NA		NA	NA	NA	stranded > 0.65	0.883041	63302373	20-101	49	57.0602	97.7289	63302373	196	55897997	88.3	196.23	24622912	24391463	24423876	160344	23093	15599	0.21	0.01	1.73
SRR17831341	PRJNA797993	SAMN25042737	Illumina NovaSeq 6000	male	bone marrow	bone marrow	72	v23				MDS-MLD			NA									NA		NA	NA	NA	stranded > 0.65	1.00749	61469363	20-101	53	53.2044	96.7598	61469363	194	49586999	80.67	194.34	13792041	13602742	13669093	98000	11168	13780	0.25	0.01	1.83
SRR17831342	PRJNA797993	SAMN25042736	Illumina NovaSeq 6000	male	bone marrow	bone marrow	65	v22				MDS-MLD			NA									NA		NA	NA	NA	stranded > 0.65	0.743866	56762376	20-101	46	73.3806	96.965	56762376	194	46808559	82.46	194.36	3441502	3357406	3404035	25399	3179	8889	0.21	0.02	1.85
SRR17831343	PRJNA797993	SAMN25042735	Illumina NovaSeq 6000	male	bone marrow	bone marrow	65	v21				MDS-MLD			NA									NA		NA	NA	NA	stranded > 0.65	0.872275	55995767	20-151	50	57.2574	134.502	55995767	269	48317033	86.29	269.88	23285638	23011774	23090161	157043	19910	18524	0.21	0.01	1.94
SRR17831344	PRJNA797993	SAMN25042717	Illumina HiSeq 2500	male	bone marrow	bone marrow	63	v3				MDS-MLD			NA									NA		NA	NA	NA	stranded > 0.65	0.952123	69646048	20-126	53	51.7817	116.944	69646048	232	52949549	76.03	232.65	18673953	18418029	18512342	130545	15410	15656	0.17	0.01	1.79
SRR17831345	PRJNA797993	SAMN25042734	Illumina NovaSeq 6000	female	bone marrow	bone marrow	75	v20				MDS-SLD			NA									NA		NA	NA	NA	stranded > 0.65	0.900279	57770021	20-151	51	56.7724	133.325	57770021	266	48743412	84.37	267.43	20195752	19931229	20018955	140805	17486	18506	0.21	0.02	1.89
SRR17831346	PRJNA797993	SAMN25042733	Illumina NovaSeq 6000	female	bone marrow	bone marrow	76	v19				MDS-EB-1			NA									NA		NA	NA	NA	stranded > 0.65	0.910878	53368793	20-151	47	66.154	139.18	53368793	278	48629686	91.12	278.18	16595509	16246341	16449752	115427	12765	17565	0.21	0.02	1.89
SRR17831347	PRJNA797993	SAMN25042732	Illumina NovaSeq 6000	male	bone marrow	bone marrow	69	v18				MDS-MLD			NA									NA	K700E	246	197	44	stranded > 0.65	1.02166	74120033	20-101	48	59.2293	97.6108	74120033	196	65098897	87.83	196.12	20926358	20668941	20752565	142412	16717	14664	0.22	0.01	1.72
SRR17831348	PRJNA797993	SAMN25042731	Illumina HiSeq 2500	female	bone marrow	bone marrow	37	v17				MDS-SLD			NA									NA		NA	NA	NA	stranded > 0.65	0.934542	68673767	20-126	48	57.7246	116.594	68673767	231	58700877	85.48	232.12	22341808	22089851	22154618	152176	18490	16524	0.15	0.01	1.77
SRR17831349	PRJNA797993	SAMN25042730	Illumina NovaSeq 6000	male	bone marrow	bone marrow	68	v16				MDS-RS			NA									NA	K700E	160	139	46	stranded > 0.65	1.02084	63670168	20-101	49	53.59	97.7055	63670168	196	55752252	87.56	196.21	19476336	19175685	19316805	130430	14945	14156	0.22	0.01	1.71
SRR17831350	PRJNA797993	SAMN25042729	Illumina NovaSeq 6000	male	bone marrow	bone marrow	77	v15				MDS-SLD			NA									NA	K666N	288	68	19	stranded > 0.65	0.869592	90971450	20-101	50	65.5423	96.3475	90971450	193	78312640	86.08	193.68	26459141	26152089	26243810	174165	22050	19116	0.22	0.01	1.79
SRR17831351	PRJNA797993	SAMN25042728	Illumina NovaSeq 6000	male	bone marrow	bone marrow	54	v14				MDS-RS			NA									NA	K700E	337	259	43	stranded > 0.65	0.850038	93237871	20-101	53	46.5275	96.3883	93237871	194	74815759	80.24	194.21	35295746	34887753	35029180	222531	26120	17915	0.2	0.01	1.77
SRR17831352	PRJNA797993	SAMN25042727	Illumina HiSeq 2500	female	bone marrow	bone marrow	51	v13				MDS-del(5q)			NA									NA		NA	NA	NA	stranded > 0.65	0.927828	61535521	20-126	49	53.2926	117.866	61535521	234	54707886	88.9	234.13	26506590	26194132	26286557	179904	22880	17249	0.15	0.01	1.75
SRR17831353	PRJNA797993	SAMN25042726	Illumina NovaSeq 6000	female	bone marrow	bone marrow	82	v12				MDS-RS			NA									NA	R625L	535	205	28	stranded > 0.65	0.849074	100853047	20-101	51	61.4952	96.8209	100853047	194	86485154	85.75	194.69	32476882	32084851	32218903	211367	27181	19431	0.21	0.01	1.79
SRR17831354	PRJNA797993	SAMN25042725	Illumina HiSeq 2500	male	bone marrow	bone marrow	65	v11				MDS-MLD			NA									NA		NA	NA	NA	stranded > 0.65	0.955614	68079911	20-126	49	56.7188	116.783	68079911	232	60340291	88.63	232.26	27706197	27414095	27473764	191021	23608	17804	0.15	0.01	1.77
SRR17831355	PRJNA797993	SAMN25042716	Illumina HiSeq 2500	female	bone marrow	bone marrow	72	v2				MDS-EB-1			NA									NA		NA	NA	NA	stranded > 0.65	0.935323	69768743	20-126	47	61.0842	117.551	69768743	233	62453632	89.52	233.45	24595145	24253839	24389899	168265	18623	18358	0.16	0.02	1.78
SRR17831356	PRJNA797993	SAMN25042715	Illumina HiSeq 2500	female	bone marrow	bone marrow	69	v1				MDS-EB-1			NA									NA	K700E	228	192	46	stranded > 0.65	0.912395	65487656	20-126	48	63.9881	116.845	65487656	232	58069283	88.67	231.8	17234965	16941782	17081934	119689	13543	19799	0.16	0.01	1.78
SRR22244937	PRJNA896500	SAMN31544811	Illumina NovaSeq 6000	female	bone marrow	CD34+	74	p10		none		MDS-5q-			NA				SRSF2					NA		NA	NA	NA	stranded > 0.65	1.02724	65150084	20-101	48	51.8355	97.672	65150084	196	58488039	89.77	196.17	20422063	20173818	20245403	144532	17928	14200	0.21	0.01	1.69
SRR22244938	PRJNA896500	SAMN31544810	Illumina NovaSeq 6000	female	bone marrow	CD34+	79	p9		none		MDS-RS			NA				SF3B1				MUT	NA	E622D	365	360	50	stranded > 0.65	0.893798	99162928	20-101	52	56.9554	95.9586	99162928	193	81920869	82.61	192.98	31109511	30779519	30860121	204621	25659	19110	0.21	0.01	1.77
SRR22244939	PRJNA896500	SAMN31544809	Illumina NovaSeq 6000	male	bone marrow	CD34+	67	p8		none		MDS-MLD			NA				SF3B1				MUT	NA	H662Q	209	191	48	stranded > 0.65	1.02335	78632620	20-101	50	50.7345	97.9446	78632620	197	67323267	85.62	196.82	22649034	22394090	22460348	154059	18647	15980	0.21	0.02	1.72
SRR22244940	PRJNA896500	SAMN31544808	Illumina NovaSeq 6000	female	bone marrow	CD34+	57	p7		none		MDS-RS			NA				SF3B1				MUT	NA	E622D	232	203	47	stranded > 0.65	1.00161	67373855	20-101	48	67.3824	98.0382	67373855	197	59836227	88.81	196.86	17284335	17062143	17142510	115057	13867	12901	0.23	0.02	1.8
SRR22244941	PRJNA896500	SAMN31544807	Illumina NovaSeq 6000	male	bone marrow	CD34+	73	p6		none		MDS-MLD			NA				SF3B1				MUT	NA	K700E	304	217	42	stranded > 0.65	0.833041	101016345	20-101	52	59.9263	96.3045	101016345	193	83517135	82.68	193.86	33773423	33355629	33499420	224844	28936	20223	0.22	0.01	1.79
SRR22244943	PRJNA896500	SAMN31544805	Illumina HiSeq 2500	female	bone marrow	CD34+	61	p4		none		MDS-MLD			NA				none					NA		NA	NA	NA	stranded > 0.65	0.935179	61257667	20-126	49	59.6539	115.05	61257667	229	53391475	87.16	229.09	20327742	20081485	20151976	141745	18492	15529	0.16	0.01	1.74
SRR22244944	PRJNA896500	SAMN31544825	Illumina NovaSeq 6000	male	bone marrow	CD34+	58	p24		none		MDS-MLD			NA				ASXL1; RUNX1					NA		NA	NA	NA	stranded > 0.65	0.936934	72829744	20-151	51	48.2743	137.09	72829744	274	60914990	83.64	274.94	36835046	36422798	36534054	246183	31638	23171	0.19	0.01	1.85
SRR22244945	PRJNA896500	SAMN31544824	Illumina NovaSeq 6000	female	bone marrow	CD34+	64	p23		none		MDS-SLD			NA				TET2; PHF6					NA		NA	NA	NA	stranded > 0.65	1.02359	62052708	20-101	47	64.8383	97.8266	62052708	196	56306152	90.74	196.55	17320229	17116067	17174949	119395	13893	11992	0.21	0.01	1.7
SRR22244946	PRJNA896500	SAMN31544823	Illumina NovaSeq 6000	female	bone marrow	CD34+	77	p22		none		MDS-5q-			NA				DNMT3A; EZH2					NA		NA	NA	NA	stranded > 0.65	1.03765	72787266	20-101	49	45.067	97.8686	72787266	196	64622897	88.78	196.29	28929858	28655983	28695308	194852	23970	15728	0.16	0.01	1.72
SRR22244947	PRJNA896500	SAMN31544822	Illumina NovaSeq 6000	female	bone marrow	CD34+	58	p21		none		MDS-5q-			NA				DNMT3A; TP53					NA		NA	NA	NA	stranded > 0.65	1.01197	52747538	20-101	49	47.0976	97.5407	52747538	196	42637008	80.83	196.17	12507826	12314282	12396969	85310	10339	15208	0.23	0.02	1.77
SRR22244948	PRJNA896500	SAMN31544804	Illumina HiSeq 2500	female	bone marrow	CD34+	67	p3		none		MDS-MLD			NA				none					NA		NA	NA	NA	stranded > 0.65	0.941074	67275164	20-126	48	55.0132	117.329	67275164	233	60919384	90.55	232.98	29710467	29394117	29461155	203621	27220	18471	0.14	0.01	1.76
SRR22244949	PRJNA896500	SAMN31544821	Illumina NovaSeq 6000	female	bone marrow	CD34+	63	p20		none		MDS-EB2			NA				DNMT3A; ASXL; TP53					NA		NA	NA	NA	stranded > 0.65	1.01831	64772837	20-101	47	61.3915	97.9183	64772837	197	58086305	89.68	196.64	16247472	16073377	16111276	110242	13369	12585	0.22	0.02	1.69
SRR22244950	PRJNA896500	SAMN31544820	Illumina NovaSeq 6000	female	bone marrow	CD34+	63	p19		none		MDS-MLD hypopl.			NA				DNMT3A					NA		NA	NA	NA	stranded > 0.65	0.897697	46358323	20-101	50	44.9924	97.1152	46358323	194	36769831	79.32	194.8	4488547	4328929	4440672	31738	3603	12534	0.22	0.01	1.96
SRR22244951	PRJNA896500	SAMN31544819	Illumina NovaSeq 6000	female	bone marrow	CD34+	44	p18		none		MDS-MLD			NA				DNMT3A					NA		NA	NA	NA	stranded > 0.65	0.886459	73222649	20-101	48	62.6955	97.738	73222649	196	66097835	90.27	196.23	21967027	21720568	21786659	143484	19160	17724	0.22	0.01	1.76
SRR22244952	PRJNA896500	SAMN31544818	Illumina NovaSeq 6000	female	bone marrow	CD34+	65	p17		none		MDS-MLD			NA				SF3B1; DNMT3A; TET2; JAK2				MUT	NA	K700E	248	181	42	stranded > 0.65	1.01976	70952910	20-101	48	52.924	97.868	70952910	197	63428598	89.4	196.64	21268389	20981591	21088405	146815	17758	15411	0.2	0.01	1.71
SRR22244953	PRJNA896500	SAMN31544817	Illumina NovaSeq 6000	female	bone marrow	CD34+	64	p16		none		MDS-RS			NA				SF3B1; DNMT3A; CUX1				MUT	NA	E622D	171	171	50	stranded > 0.65	1.02912	58135387	20-101	50	49.6484	97.7651	58135387	196	50828763	87.43	196.35	19478331	19258682	19320145	132892	14485	10809	0.21	0.01	1.76
SRR22244955	PRJNA896500	SAMN31544815	Illumina NovaSeq 6000	male	bone marrow	CD34+	69	p14		none		MDS-EB2			NA				U2AF1					NA		NA	NA	NA	stranded > 0.65	1.02008	70781827	20-101	48	62.0188	97.8502	70781827	197	62896855	88.86	196.7	20564614	20355772	20403553	133368	13819	13874	0.21	0.01	1.7
SRR22244956	PRJNA896500	SAMN31544814	Illumina NovaSeq 6000	male	bone marrow	CD34+	44	p13		none		MDS-MLD			NA				ZRSR2; PHF6					NA		NA	NA	NA	stranded > 0.65	0.850795	94466236	20-101	50	59.5535	95.7476	94466236	192	80446736	85.16	192.63	19422954	19084603	19252802	136177	12049	21926	0.23	0.01	1.88
SRR22244957	PRJNA896500	SAMN31544813	Illumina NovaSeq 6000	male	bone marrow	CD34+	67	p12		none		MDS-EB1			NA				SRSF2; SETBP1					NA		NA	NA	NA	stranded > 0.65	0.926968	96378844	20-101	50	47.8559	97.3707	96378844	196	85261286	88.46	195.73	40488963	40080528	40164977	267406	35158	21422	0.2	0.01	1.75
SRR22244959	PRJNA896500	SAMN31544803	Illumina NovaSeq 6000	male	bone marrow	CD34+	47	p2		none		MDS-SLD			NA				none					NA		NA	NA	NA	stranded > 0.65	1.0243	77624260	20-101	48	57.8197	97.9512	77624260	197	68699890	88.5	196.84	23980896	23763137	23782637	163174	20000	15085	0.21	0.01	1.69
SRR22244960	PRJNA896500	SAMN31544802	Illumina HiSeq 2500	female	bone marrow	CD34+	27	p1		none		MDS-SLD			NA				none					NA		NA	NA	NA	stranded > 0.65	0.93332	67842442	20-126	48	57.8051	116.762	67842442	232	59241594	87.32	232.43	22745975	22500771	22557596	153772	18541	16066	0.16	0.01	1.75
SRR3037361	PRJNA306622	SAMN04358119	Illumina HiSeq 2000	male	bone marrow	CD34+	69				AZA Non-Responder	MDS/RAEB-2			NA						Pre-treatment			trisomy 8		NA	NA	NA	unstranded	0.530845	26279203	90	45	50.7529	90	26279203	180	23194075	88.26	176.27	8369797	8252740	8310422	52632	4521	2222	0.43	0.01	1.57
SRR3037362	PRJNA306622	SAMN04358120	Illumina HiSeq 2000	male	bone marrow	CD34+	73				AZA Responder	MDS/RAEB-2			NA						Pre-treatment					NA	NA	NA	unstranded	0.538157	26551049	90	45	58.7936	90	26551049	180	23027702	86.73	176.7	9251404	9170637	9186499	56039	6145	2721	0.37	0.01	1.49
SRR3037363	PRJNA306622	SAMN04358121	Illumina HiSeq 2000	male	bone marrow	CD34+	75				AZA Non-Responder	MDS/RCMD			NA						Pre-treatment			47,sl,+8[4]/46,sl,del(13)(q12q14)[3]/46,XX[8]		NA	NA	NA	unstranded	0.536192	26838893	90	46	60.0088	90	26838893	180	22227355	82.82	176.57	7198959	7128027	7146629	45184	4883	2263	0.39	0.01	1.51
SRR3037364	PRJNA306622	SAMN04358122	Illumina HiSeq 2000	female	bone marrow	CD34+	75				AZA Responder	MDS/RAEB-2			NA						Pre-treatment					NA	NA	NA	unstranded	0.534427	25964869	90	46	59.1636	90	25964869	180	21584596	83.13	176.54	6656471	6584675	6608811	40768	4467	2425	0.43	0.01	1.62
SRR3037365	PRJNA306622	SAMN04358123	Illumina HiSeq 2000	male	bone marrow	CD34+	88				AZA Non-Responder	MDS/RAEB-2			NA						Pre-treatment			44, XY, -1, del(5)(q15q31), -15, ?del(16)(qww),der(16)t(15;16)(q11,2;q24),-19,add(21)(p11,1),-22,+r,+mar(16)/45,s1,+r2(4)		NA	NA	NA	unstranded	0.539794	27094073	90	47	56.9969	90	27094073	180	21477160	79.27	176.15	7593405	7508887	7539758	46381	4939	2327	0.52	0.01	1.49
SRR3037366	PRJNA306622	SAMN04358124	Illumina HiSeq 2000	male	bone marrow	CD34+	73				AZA Responder	MDS/RAEB-2			NA						Pre-treatment					NA	NA	NA	unstranded	0.534062	26689938	90	45	63.6098	90	26689938	180	22586830	84.63	176.75	6579731	6512664	6533301	39899	4240	2291	0.42	0.01	1.57
SRR3037369	PRJNA306622	SAMN04358127	Illumina HiSeq 2000	female	bone marrow	CD34+	68				AZA Non-Responder	MDS/RAEB-2			NA						Pre-treatment					NA	NA	NA	unstranded	0.53944	26957739	90	46	59.4792	90	26957739	180	22595961	83.82	176.5	8524648	8423182	8465371	52186	4725	2366	0.39	0.01	1.53
SRR3213661	PRJNA306622	SAMN04543112	Illumina HiSeq 2000	female	bone marrow	CD34+	75				AZA Responder	MDS/RAEB-2			NA						Pre-treatment					NA	NA	NA	unstranded	0.534895	25645788	90	46	52.016	90	25645788	180	19689112	76.77	175.86	5616446	5556066	5577667	33533	3350	1896	0.52	0.01	1.61
SRR3213665	PRJNA306622	SAMN04543116	Illumina HiSeq 2000	female	bone marrow	CD34+	69				AZA Responder	MDS/RAEB-2			NA						Pre-treatment			11 q deletion. Loss of MLL signal (by FISH)		NA	NA	NA	unstranded	0.537234	25956606	90	48	48.0486	90	25956606	180	20244365	77.99	175.45	7983267	7847743	7928104	48930	3982	2251	0.42	0.01	1.57
SRR3213666	PRJNA306622	SAMN04543117	Illumina HiSeq 2000	female	bone marrow	CD34+	77				AZA Responder	MDS/RAEB-2			NA						Pre-treatment			46,XX,del(7)(q22),der(12)inv(12)(q13q24.1)t(5;12)(q12;q24.1)[8]/47,sl,+8[4]/46,sl,del(13)(q12q14)[3]/46,XX[8]		NA	NA	NA	unstranded	0.52891	27291978	90	47	52.7209	90	27291978	180	22366696	81.95	174.99	9033162	8950317	8975187	50864	4660	2451	0.41	0.01	1.43
SRR3213673	PRJNA306622	SAMN04543124	Illumina HiSeq 2000	male	bone marrow	CD34+	73				AZA Responder	MDS/RAEB-2			NA						Cycle 6 day 28 (C6d28)					NA	NA	NA	unstranded	0.52423	24736529	90	45	56.679	90	24736529	180	20846842	84.28	175.87	4401773	4358547	4369934	27345	2952	1542	0.42	0.01	1.52
SRR3213681	PRJNA306622	SAMN04543132	Illumina HiSeq 2000	female	bone marrow	CD34+	69				AZA Responder	MDS/RAEB-2			NA						Cycle 6 day 28 (C6d28)			11 q deletion. Loss of MLL signal (by FISH)		NA	NA	NA	unstranded	0.527826	27161308	90	49	48.1766	90	27161308	180	19864968	73.14	174.61	7830856	7757935	7777425	46060	4953	2418	0.55	0.01	1.47
SRR3213682	PRJNA306622	SAMN04543133	Illumina HiSeq 2000	female	bone marrow	CD34+	77				AZA Responder	MDS/RAEB-2			NA						Cycle 6 day 28 (C6d28)			46,XX,del(7)(q22),der(12)inv(12)(q13q24.1)t(5;12)(q12;q24.1)[8]/47,sl,+8[4]/46,sl,del(13)(q12q14)[3]/46,XX[8]		NA	NA	NA	unstranded	0.529763	25657936	90	47	51.0824	90	25657936	180	20655838	80.5	174.71	7718180	7657934	7668192	43459	4420	2109	0.51	0.01	1.42
SRR3571763	PRJNA306622	SAMN04358128	Illumina HiSeq 2000	male	bone marrow	CD34+	75				AZA Responder	MDS/RAEB-2			NA						Pre-treatment					NA	NA	NA	unstranded	0.518633	27291978	90	48	44.2305	90	27291978	180	21467370	78.66	174.16	8074551	7977354	8023780	44124	3948	2699	0.41	0.01	1.43
SRR3571767	PRJNA306622	SAMN04543128	Illumina HiSeq 2000	male	bone marrow	CD34+	75				AZA Responder	MDS/RAEB-2			NA						Cycle 6 day 28 (C6d28)					NA	NA	NA	unstranded	0.522543	27343725	90	49	40.056	90	27343725	180	20570626	75.23	174.63	7009133	6895604	6964501	38796	3726	2110	0.5	0.01	1.47
SRR4036035	PRJNA339149	SAMN05580181	Illumina HiSeq 2000	male	bone marrow	bone marrow	NA					int-1			NA									NA		NA	NA	NA	unstranded	0.558634	60117486	90	49	47.1685	90	60117486	180	55474619	92.28	179.06	31534041	31161068	31303098	195724	24025	11194	0.21	0.01	1.68
SRR4036036	PRJNA339149	SAMN05580180	Illumina HiSeq 2000	male	bone marrow	bone marrow	NA					low			NA				SF3B1				K700E	NA	K700E	513	320	38	unstranded	0.554958	60076225	90	49	41.0818	90	60076225	180	55013400	91.57	179.07	36096061	35696196	35837890	217324	28514	12333	0.19	0.01	1.56
SRR4036037	PRJNA339149	SAMN05580179	Illumina HiSeq 2000	male	bone marrow	bone marrow	NA					low			NA				SF3B1				K700E	NA	K700E	458	338	42	unstranded	0.552868	60204064	90	49	39.7427	90	60204064	180	54361099	90.29	179.03	33634774	33264156	33407212	191220	25521	10821	0.21	0.01	1.55
SRR4036038	PRJNA339149	SAMN05580178	Illumina HiSeq 2000	male	bone marrow	bone marrow	NA					int-1			NA				SF3B1				K666R	NA	K666R	556	423	43	unstranded	0.556606	60152767	90	49	38.11	90	60152767	180	54974459	91.39	179.01	37851028	37475979	37591101	219214	28595	12118	0.22	0.01	1.52
SRR4036039	PRJNA339149	SAMN05580177	Illumina HiSeq 2000	male	bone marrow	bone marrow	NA					int-1			NA									NA		NA	NA	NA	unstranded	0.555934	60012714	90	50	38.7707	90	60012714	180	54264866	90.42	179.03	36024259	35592109	35766160	219616	25332	13151	0.2	0.01	1.57
SRR4036040	PRJNA339149	SAMN05580176	Illumina HiSeq 2000	male	bone marrow	bone marrow	NA					low			NA									NA		NA	NA	NA	unstranded	0.562387	60445303	90	47	31.2338	90	60445303	180	54761869	90.6	179.17	44404262	44043906	44133710	245124	17422	8006	0.19	0.01	1.6
SRR4036041	PRJNA339149	SAMN05580175	Illumina HiSeq 2000	male	bone marrow	bone marrow	NA					low			NA				SF3B1				K666T	NA	K666T	770	617	44	unstranded	0.555566	59984427	90	48	40.0931	90	59984427	180	54960054	91.62	179.06	35246951	34786139	34994934	211103	27882	13032	0.22	0.01	1.51
SRR4036042	PRJNA339149	SAMN05580174	Illumina HiSeq 2000	male	bone marrow	bone marrow	NA					low			NA				SF3B1				K700E	NA	K700E	565	325	37	unstranded	0.550233	60198581	90	49	44.402	90	60198581	180	54628565	90.75	179.07	34053213	33713559	33797578	215422	29301	10912	0.2	0.01	1.59
SRR4036043	PRJNA339149	SAMN05580173	Illumina HiSeq 2000	male	bone marrow	bone marrow	NA					low			NA				SF3B1				K700E	NA	K700E	579	281	33	unstranded	0.551072	60103438	90	49	45.4687	90	60103438	180	54386436	90.49	179.06	31013127	30661576	30777984	198390	25841	10912	0.21	0.01	1.57
SRR5139258	PRJNA306622	SAMN06198224	Illumina HiSeq 2000	male	bone marrow	CD34+	69				AZA Non-Responder	MDS/RAEB-2			NA						Cycle 6 day 28 (C6d28)			trisomy 8		NA	NA	NA	unstranded	0.538691	26769730	90	44	60.31	90	26769730	180	23862823	89.14	177.2	8111703	8035965	8057012	47727	4265	2699	0.39	0.01	1.51
SRR5139259	PRJNA306622	SAMN06198223	Illumina HiSeq 2000	female	bone marrow	CD34+	68				AZA Non-Responder	MDS/RAEB-2			NA						Cycle 6 day 28 (C6d28)					NA	NA	NA	unstranded	0.536834	27530661	90	44	71.402	90	27530661	180	24676267	89.63	177.05	6977184	6890965	6923286	46956	4848	2094	0.39	0.01	1.57
SRR5139260	PRJNA306622	SAMN06198222	Illumina HiSeq 2000	male	bone marrow	CD34+	75				AZA Non-Responder	MDS/RCMD			NA						Cycle 6 day 28 (C6d28)			47,sl,+8[4]/46,sl,del(13)(q12q14)[3]/46,XX[8]		NA	NA	NA	unstranded	0.534289	27665798	90	46	59.7109	90	27665798	180	22873662	82.68	176.7	7547212	7464287	7492827	46973	4948	2464	0.42	0.01	1.54
SRR6781175	PRJNA435879	SAMN08605856	Illumina HiSeq 2000		Hematopoietic stem cells	CD34+ hematopoietic stem cells	NA					tMDS			NA									NA		NA	NA	NA	unstranded	0.589132	49872842	101	48	35.976	101	49872842	202	39066071	78.33	196.01	40466979	40225881	40184119	243718	20797	18345	0.42	0.01	1.55
SRR6781176	PRJNA435879	SAMN08605855	Illumina HiSeq 2000		Hematopoietic stem cells	CD34+ hematopoietic stem cells	NA					tMDS			NA									NA	K700E	28	4	12	unstranded	0.570164	49017680	101	48	24.2592	101	49017680	202	17187371	35.06	191.69	6572366	6439386	6532194	34676	2203	3293	0.27	0.01	1.65
SRR6781177	PRJNA435879	SAMN08605854	Illumina HiSeq 2000		Hematopoietic stem cells	CD34+ hematopoietic stem cells	NA					sMDS			NA									NA		NA	NA	NA	unstranded	0.564066	39590382	101	39	69.5667	101	39590382	202	28620557	72.29	195.36	2036458	2013508	2021402	12812	1262	982	0.41	0.02	1.59
SRR6781178	PRJNA435879	SAMN08605853	Illumina HiSeq 2000		Hematopoietic stem cells	CD34+ hematopoietic stem cells	NA					sMDS			NA									NA		NA	NA	NA	unstranded	0.632903	45844437	101	52	26.0365	101	45844437	202	21253244	46.36	191.23	15821896	15630114	15707015	92147	10010	12724	0.36	0.01	1.51
SRR6781179	PRJNA435879	SAMN08605852	Illumina HiSeq 2000		Hematopoietic stem cells	CD34+ hematopoietic stem cells	NA					sMDS			NA									NA	K700E	67	55	45	unstranded	0.552854	34956637	101	48	39.6147	101	34956637	202	20531431	58.73	192.03	8248583	8052117	8197008	44854	3596	3125	0.38	0.01	1.58
SRR6781180	PRJNA435879	SAMN08605851	Illumina HiSeq 2000		Hematopoietic stem cells	CD34+ hematopoietic stem cells	NA					tMDS			NA									NA		NA	NA	NA	unstranded	0.57264	52426095	101	48	36.3307	101	52426095	202	44441174	84.77	198.38	37903609	37636213	37635424	226628	24890	16667	0.31	0.01	1.46
SRR6781181	PRJNA435879	SAMN08605850	Illumina HiSeq 2000		Hematopoietic stem cells	CD34+ hematopoietic stem cells	NA					tMDS			NA									NA	K666N	423	367	46	unstranded	0.568569	102924750	101	49	33.4229	101	102924750	202	89973907	87.42	199.57	71079979	70347227	70551542	446049	52921	29467	0.31	0.01	1.5
SRR6781182	PRJNA435879	SAMN08605849	Illumina HiSeq 2000		Hematopoietic stem cells	CD34+ hematopoietic stem cells	NA					sMDS			NA									NA	K700E	8	5	38	unstranded	0.615645	23563044	101	50	30.3628	101	23563044	202	11222970	47.63	191.52	5766949	5698628	5736139	26896	2027	1887	0.39	0.02	1.46
SRR6781183	PRJNA435879	SAMN08605848	Illumina HiSeq 2000		Hematopoietic stem cells	CD34+ hematopoietic stem cells	NA					tMDS			NA									NA		NA	NA	NA	unstranded	0.580178	92130403	101	50	31.1342	101	92130403	202	75937296	82.42	197.58	70750380	70108424	70241392	415347	51567	42074	0.36	0.01	1.53
SRR6781184	PRJNA435879	SAMN08605847	Illumina HiSeq 2000		Hematopoietic stem cells	CD34+ hematopoietic stem cells	NA					tMDS			NA									NA		NA	NA	NA	unstranded	0.597665	106328334	101	45	16.6487	101	106328334	202	70830098	66.61	193.05	59986514	59527338	59574228	343897	28943	39446	0.42	0.01	1.66
SRR6781185	PRJNA435879	SAMN08605846	Illumina HiSeq 2000		Hematopoietic stem cells	CD34+ hematopoietic stem cells	NA					sMDS			NA									NA		NA	NA	NA	unstranded	0.56678	87209391	101	48	35.0898	101	87209391	202	72587941	83.23	197.15	67668459	67186346	67184067	409284	43875	31233	0.38	0.01	1.51
SRR6781186	PRJNA435879	SAMN08605845	Illumina HiSeq 2000		Hematopoietic stem cells	CD34+ hematopoietic stem cells	NA					tMDS			NA									NA		NA	NA	NA	unstranded	0.569956	71243917	101	48	41.0203	101	71243917	202	59526847	83.55	198.06	53715123	53311430	53317667	333811	37378	26267	0.39	0.01	1.54
SRR6781187	PRJNA435879	SAMN08605844	Illumina HiSeq 2000		Hematopoietic stem cells	CD34+ hematopoietic stem cells	NA					tMDS			NA									NA	H662Y	42	24	36	unstranded	0.648039	53054584	101	48	29.718	101	53054584	202	31582068	59.53	192.25	27166052	26932306	26958341	174849	18108	14754	0.34	0.01	1.56
SRR6781188	PRJNA435879	SAMN08605843	Illumina HiSeq 2000		Hematopoietic stem cells	CD34+ hematopoietic stem cells	NA					sMDS			NA									NA	K700E	0	13	100	unstranded	0.526915	76680789	101	40	87.1236	101	76680789	202	66142168	86.26	198.59	640028	605420	632224	6842	557	405	0.32	0.02	1.57
SRR6781189	PRJNA435879	SAMN08605842	Illumina HiSeq 2000		Hematopoietic stem cells	CD34+ hematopoietic stem cells	NA					tMDS			NA									NA		NA	NA	NA	unstranded	0.564126	50932876	101	43	47.5171	101	50932876	202	40511899	79.54	198.55	25508786	25238120	25290301	184925	20251	13309	0.27	0.01	1.61
SRR6781190	PRJNA435879	SAMN08605841	Illumina HiSeq 2000		Hematopoietic stem cells	CD34+ hematopoietic stem cells	NA					sMDS			NA									NA		NA	NA	NA	unstranded	0.598306	80612589	101	46	19.9108	101	80612589	202	57193184	70.95	195.34	51940876	51571941	51520137	350266	25624	44849	0.46	0.02	1.59
SRR6781191	PRJNA435879	SAMN08605840	Illumina HiSeq 2000		Hematopoietic stem cells	CD34+ hematopoietic stem cells	NA					tMDS			NA									NA		NA	NA	NA	unstranded	0.579985	43200929	101	39	47.2589	101	43200929	202	20532620	47.53	184.9	7417210	7299033	7361100	46541	3384	6185	0.36	0.02	1.61
SRR6781192	PRJNA435879	SAMN08605839	Illumina HiSeq 2000		Hematopoietic stem cells	CD34+ hematopoietic stem cells	NA					tMDS			NA									NA		NA	NA	NA	unstranded	0.596722	68381553	101	45	25.5648	101	68381553	202	48696815	71.21	194.98	41251672	40930446	40914544	265897	26931	44300	0.49	0.01	1.6
SRR6781193	PRJNA435879	SAMN08605838	Illumina HiSeq 2000		Hematopoietic stem cells	CD34+ hematopoietic stem cells	NA					tMDS			NA									NA		NA	NA	NA	unstranded	0.545842	48365635	101	47	33.0561	101	48365635	202	28454094	58.83	194.66	9582786	9406328	9517954	55738	4906	4188	0.29	0.01	1.62
SRR6781194	PRJNA435879	SAMN08605837	Illumina HiSeq 2000		Hematopoietic stem cells	CD34+ hematopoietic stem cells	NA					tMDS			NA									NA		NA	NA	NA	unstranded	0.567397	53714397	101	48	39.9431	101	53714397	202	43222037	80.47	197.16	39851342	39629815	39558609	249515	24535	18683	0.42	0.01	1.49
SRR6781195	PRJNA435879	SAMN08605836	Illumina HiSeq 2000		Hematopoietic stem cells	CD34+ hematopoietic stem cells	NA					tMDS			NA									NA		NA	NA	NA	unstranded	0.595214	63596826	101	43	41.8092	101	63596826	202	36598482	57.55	197.01	21081355	20758696	20911005	139170	11195	19985	0.24	0.01	1.69
SRR6781196	PRJNA435879	SAMN08605835	Illumina HiSeq 2000		Hematopoietic stem cells	CD34+ hematopoietic stem cells	NA					tMDS			NA									NA		NA	NA	NA	unstranded	0.619778	24205590	101	47	22.2056	101	24205590	202	12272263	50.7	194.97	11876755	11800568	11783924	79867	6340	6624	0.24	0.01	1.61
SRR6781197	PRJNA435879	SAMN08605834	Illumina HiSeq 2000		Hematopoietic stem cells	CD34+ hematopoietic stem cells	NA					sMDS			NA									NA		NA	NA	NA	unstranded	0.556549	99586970	101	49	40.0807	101	99586970	202	74859000	75.17	197.05	49676085	49240472	49329191	298511	28822	19561	0.38	0.01	1.56
SRR6781198	PRJNA435879	SAMN08605833	Illumina HiSeq 2000		Hematopoietic stem cells	CD34+ hematopoietic stem cells	NA					sMDS			NA									NA		NA	NA	NA	unstranded	0.595553	15829547	101	44	40.5773	101	15829547	202	10193062	64.39	194	9690953	9622319	9615719	63480	5499	6255	0.84	0.01	1.6
SRR6781199	PRJNA435879	SAMN08605832	Illumina HiSeq 2000		Hematopoietic stem cells	CD34+ hematopoietic stem cells	NA					sMDS			NA									NA	K700E	52	38	42	unstranded	0.564202	86894944	101	51	23.7657	101	86894944	202	65010036	74.81	199.27	58207436	57594006	57848910	307035	33006	18485	0.22	0.01	1.61
SRR6781200	PRJNA435879	SAMN08605831	Illumina HiSeq 2000		Hematopoietic stem cells	CD34+ hematopoietic stem cells	NA					tMDS			NA									NA	K666N	40	39	49	unstranded	0.564337	33443647	101	40	48.2571	101	33443647	202	18025560	53.9	189.46	7854331	7724660	7790989	53488	4714	5140	0.33	0.02	1.58
SRR6781201	PRJNA435879	SAMN08605827	Illumina HiSeq 2000		Hematopoietic stem cells	CD34+ hematopoietic stem cells	NA					tMDS			NA									NA	N626D	90	54	38	unstranded	0.577342	37135885	101	46	38.5956	101	37135885	202	23316334	62.79	195.34	14944501	14758637	14832151	92668	8525	11157	0.41	0.01	1.58
SRR6781202	PRJNA435879	SAMN08605761	Illumina HiSeq 2000		Hematopoietic stem cells	CD34+ hematopoietic stem cells	NA					sMDS			NA									NA		NA	NA	NA	unstranded	0.572195	43021893	101	55	20.0736	101	43021893	202	29279277	68.06	198.46	23196811	23033572	23101779	79688	9701	5643	0.24	0.01	1.45
SRR6781203	PRJNA435879	SAMN08605760	Illumina HiSeq 2000		Hematopoietic stem cells	CD34+ hematopoietic stem cells	NA					sMDS			NA									NA		NA	NA	NA	unstranded	0.57533	40469265	101	49	39.7641	101	40469265	202	32973594	81.48	197.81	32109650	31900858	31882195	196386	17155	13914	0.31	0.01	1.57
SRR6781204	PRJNA435879	SAMN08605759	Illumina HiSeq 2000		Hematopoietic stem cells	CD34+ hematopoietic stem cells	NA					sMDS			NA									NA		NA	NA	NA	unstranded	0.578289	78809435	101	48	35.3228	101	78809435	202	61798524	78.42	195.59	55063282	54620880	54687301	320129	29415	26437	0.4	0.02	1.59
SRR6781205	PRJNA435879	SAMN08605830	Illumina HiSeq 2000		Hematopoietic stem cells	CD34+ hematopoietic stem cells	NA					tMDS			NA									NA	H662Y	26	18	41	unstranded	0.565973	55705914	101	40	65.9602	101	55705914	202	40213057	72.19	195.69	7651484	7543844	7598439	45600	4168	3277	0.23	0.01	1.65
SRR6781206	PRJNA435879	SAMN08605829	Illumina HiSeq 2000		Hematopoietic stem cells	CD34+ hematopoietic stem cells	NA					sMDS			NA									NA	H662Q	399	276	41	unstranded	0.559815	135319746	101	48	30.2508	101	135319746	202	98880526	73.07	196.94	45103893	44303301	44802027	245121	24137	32608	0.37	0.01	1.52
SRR6781207	PRJNA435879	SAMN08605828	Illumina HiSeq 2000		Hematopoietic stem cells	CD34+ hematopoietic stem cells	NA					tMDS			NA									NA		NA	NA	NA	unstranded	0.624814	62637533	101	40	28.5771	101	62637533	202	21102472	33.69	192.02	9756876	9601126	9684387	60735	5683	6071	0.3	0.01	1.65
SRR6781208	PRJNA435879	SAMN08605758	Illumina HiSeq 2000		Hematopoietic stem cells	CD34+ hematopoietic stem cells	NA					sMDS			NA									NA		NA	NA	NA	unstranded	0.573944	43709752	101	43	47.6604	101	43709752	202	28549429	65.32	193.24	17416456	17210820	17276338	116558	12466	11094	0.33	0.01	1.55
SRR6781209	PRJNA435879	SAMN08605757	Illumina HiSeq 2000		Hematopoietic stem cells	CD34+ hematopoietic stem cells	NA					sMDS			NA									NA		NA	NA	NA	unstranded	0.528934	78741877	101	43	20.143	101	78741877	202	59280732	75.28	197.45	6104067	5927885	6054491	41309	3521	4746	0.4	0.01	1.49
SRR6781210	PRJNA435879	SAMN08605756	Illumina HiSeq 2000		Hematopoietic stem cells	CD34+ hematopoietic stem cells	NA					sMDS			NA									NA		NA	NA	NA	unstranded	0.597569	32951966	101	50	28.156	101	32951966	202	20890682	63.4	193.71	17174845	16904461	17064847	92334	9164	8500	0.39	0.01	1.54
SRR6781211	PRJNA435879	SAMN08605755	Illumina HiSeq 2000		Hematopoietic stem cells	CD34+ hematopoietic stem cells	NA					sMDS			NA									NA		NA	NA	NA	unstranded	0.585166	55007843	101	47	44.3173	101	55007843	202	43286205	78.69	193.2	29853833	29537073	29652765	166756	14364	19948	0.35	0.01	1.69
SRR6781212	PRJNA435879	SAMN08605754	Illumina HiSeq 2000		Hematopoietic stem cells	CD34+ hematopoietic stem cells	NA					sMDS			NA									NA		NA	NA	NA	unstranded	0.576322	33516777	101	46	61.6153	101	33516777	202	27335539	81.56	196.96	12955809	12803569	12858295	81609	8818	7087	0.35	0.01	1.57
SRR6781213	PRJNA435879	SAMN08605753	Illumina HiSeq 2000		Hematopoietic stem cells	CD34+ hematopoietic stem cells	NA					sMDS			NA									NA		NA	NA	NA	unstranded	0.564051	47180342	101	46	38.9177	101	47180342	202	35683437	75.63	197.61	27126587	26811699	26925920	168031	17409	15227	0.27	0.01	1.52
SRR6781214	PRJNA435879	SAMN08605752	Illumina HiSeq 2000		Hematopoietic stem cells	CD34+ hematopoietic stem cells	NA					tMDS			NA									NA		NA	NA	NA	unstranded	0.567731	61880902	101	45	37.9734	101	61880902	202	50222698	81.16	198.78	40103433	39739451	39791451	258122	30126	23734	0.26	0.01	1.49
SRR6781215	PRJNA435879	SAMN08605751	Illumina HiSeq 2000		Hematopoietic stem cells	CD34+ hematopoietic stem cells	NA					sMDS			NA									NA		NA	NA	NA	unstranded	0.63202	52930869	101	49	24.9653	101	52930869	202	30977496	58.52	192.13	26891294	26511573	26696413	166361	17082	11438	0.34	0.01	1.64
SRR6781216	PRJNA435879	SAMN08605750	Illumina HiSeq 2000		Hematopoietic stem cells	CD34+ hematopoietic stem cells	NA					sMDS			NA									NA		NA	NA	NA	unstranded	0.573934	57449764	101	45	39.6518	101	57449764	202	41216535	71.74	194.72	33175046	32938506	32920675	209607	25897	18867	0.33	0.01	1.52
SRR6781217	PRJNA435879	SAMN08605749	Illumina HiSeq 2000		Hematopoietic stem cells	CD34+ hematopoietic stem cells	NA					sMDS			NA									NA	K700E	194	152	44	unstranded	0.595425	79934958	101	49	34.7617	101	79934958	202	65305581	81.7	197.48	51615109	51116077	51240817	305863	39170	29259	0.39	0.01	1.46
SRR6781218	PRJNA435879	SAMN08605826	Illumina HiSeq 2000		Hematopoietic stem cells	CD34+ hematopoietic stem cells	NA					sMDS			NA									NA		NA	NA	NA	unstranded	0.590176	16729718	101	46	40.1269	101	16729718	202	9385015	56.1	195.83	7765791	7700372	7716844	40317	5116	3514	0.6	0.02	1.62
SRR7236860	PRJNA473835	SAMN09284766	Illumina HiSeq 4000		CD34+	CD34+ hematopoietic stem/progenitor cells	NA		A112						NA				SF3B1				MUT	NA	K700E	11	22	67	stranded > 0.65	0.714434	9478613	100	48	49.7096	100	9478613	200	7483937	78.96	189.42	5653042	5611438	5612748	33142	2955	4197	0.73	0.01	1.43
SRR7236866	PRJNA473835	SAMN09284765	Illumina HiSeq 4000		CD34+	CD34+ hematopoietic stem/progenitor cells	NA		A114						NA				U2AF1					NA		NA	NA	NA	stranded > 0.65	0.692966	8510304	100	47	62.3215	100	8510304	200	6843480	80.41	191.17	3990005	3956646	3959309	25500	2241	2955	0.76	0.01	1.5
SRR7236878	PRJNA473835	SAMN09284762	Illumina HiSeq 4000		CD34+	CD34+ hematopoietic stem/progenitor cells	NA		A116						NA				SF3B1				MUT	NA	K700E	18	13	42	stranded > 0.65	0.749481	9925294	100	48	48.485	100	9925294	200	7337390	73.93	187.54	5543090	5497583	5506687	31388	2805	2210	0.71	0.01	1.48
SRR7236884	PRJNA473835	SAMN09284761	Illumina HiSeq 4000		CD34+	CD34+ hematopoietic stem/progenitor cells	NA		A117						NA									NA		NA	NA	NA	stranded > 0.65	0.696335	7683564	100	47	61.0812	100	7683564	200	5977414	77.79	190.45	3356993	3326536	3332603	20610	2350	1430	0.72	0.01	1.52
SRR7236890	PRJNA473835	SAMN09284760	Illumina HiSeq 4000		CD34+	CD34+ hematopoietic stem/progenitor cells	NA		A118						NA				SF3B1				MUT	NA	K700E	25	34	58	stranded > 0.65	0.702318	8400168	100	48	56.7885	100	8400168	200	6613015	78.72	190.19	4513143	4473731	4480347	27372	2867	2557	0.73	0.01	1.51
SRR7236896	PRJNA473835	SAMN09284759	Illumina HiSeq 4000		CD34+	CD34+ hematopoietic stem/progenitor cells	NA		A119						NA				SRSF2					NA		NA	NA	NA	stranded > 0.65	0.686176	8331289	100	48	59.7076	100	8331289	200	6599472	79.21	191.64	4407166	4363503	4374811	27285	2586	2484	0.73	0.01	1.57
SRR7236902	PRJNA473835	SAMN09284757	Illumina HiSeq 4000		CD34+	CD34+ hematopoietic stem/progenitor cells	NA		A120						NA									NA		NA	NA	NA	stranded > 0.65	0.690636	8533530	100	49	52.7854	100	8533530	200	6615117	77.52	190.5	4531991	4487314	4501208	25219	2460	3104	0.71	0.01	1.55
SRR7236908	PRJNA473835	SAMN09284756	Illumina HiSeq 4000		CD34+	CD34+ hematopoietic stem/progenitor cells	NA		A121						NA									NA		NA	NA	NA	stranded > 0.65	0.728307	7042665	100	48	55.6462	100	7042665	200	5418317	76.94	188.64	3843439	3811204	3815536	23522	2032	2349	0.8	0.01	1.48
SRR7236914	PRJNA473835	SAMN09284755	Illumina HiSeq 4000		CD34+	CD34+ hematopoietic stem/progenitor cells	NA		A122						NA				SRSF2					NA		NA	NA	NA	stranded > 0.65	0.710275	8820262	100	48	50.0871	100	8820262	200	7149348	81.06	190.5	5951288	5917581	5911596	35075	2750	1867	0.69	0.01	1.54
SRR7236920	PRJNA473835	SAMN09284754	Illumina HiSeq 4000		CD34+	CD34+ hematopoietic stem/progenitor cells	NA		A123						NA				SF3B1				MUT	NA	H662Q	36	24	40	stranded > 0.65	0.72452	6636832	100	48	60.8432	100	6636832	200	5087422	76.65	188.87	3272404	3244448	3248938	19576	2042	1848	0.91	0.01	1.56
SRR7236926	PRJNA473835	SAMN09284753	Illumina HiSeq 4000		CD34+	CD34+ hematopoietic stem/progenitor cells	NA		A124						NA									NA		NA	NA	NA	stranded > 0.65	0.679784	8132326	100	48	57.7651	100	8132326	200	6280875	77.23	191.87	4483907	4442492	4451255	27973	2592	2087	0.73	0.01	1.55
SRR7236932	PRJNA473835	SAMN09284752	Illumina HiSeq 4000		CD34+	CD34+ hematopoietic stem/progenitor cells	NA		A125						NA				SF3B1				MUT	NA	K700E	6	23	79	stranded > 0.65	0.715574	8837381	100	51	45.9571	100	8837381	200	6475325	73.27	189.01	5470548	5391470	5433521	31358	3373	2296	0.77	0.01	1.52
SRR7236938	PRJNA473835	SAMN09284751	Illumina HiSeq 4000		CD34+	CD34+ hematopoietic stem/progenitor cells	NA		A126						NA									NA		NA	NA	NA	stranded > 0.65	0.665819	9197414	100	48	60.8847	100	9197414	200	7368488	80.11	192.64	4907484	4868329	4870529	31214	3307	2434	0.69	0.01	1.52
SRR7236944	PRJNA473835	SAMN09284750	Illumina HiSeq 4000		CD34+	CD34+ hematopoietic stem/progenitor cells	NA		A127						NA				SF3B1				MUT	NA	K700E	30	35	54	stranded > 0.65	0.686556	9957810	100	49	53.1433	100	9957810	200	7951611	79.85	191.34	6294475	6250684	6250207	37742	4059	2467	0.71	0.01	1.46
SRR7236950	PRJNA473835	SAMN09284749	Illumina HiSeq 4000		CD34+	CD34+ hematopoietic stem/progenitor cells	NA		A128						NA				SF3B1				MUT	NA	K700E	42	29	41	stranded > 0.65	0.672942	9160152	100	49	58.7848	100	9160152	200	6844056	74.72	191.76	4290184	4231729	4257894	27568	2323	2399	0.72	0.01	1.63
SRR7236956	PRJNA473835	SAMN09284844	Illumina HiSeq 4000		CD34+	CD34+ hematopoietic stem/progenitor cells	NA		A129						NA									NA		NA	NA	NA	stranded > 0.65	0.680666	9761298	100	49	44.6261	100	9761298	200	7598541	77.84	190.44	5158172	5094439	5123939	27623	3543	3067	0.75	0.01	1.4
SRR7236962	PRJNA473835	SAMN09284843	Illumina HiSeq 4000		CD34+	CD34+ hematopoietic stem/progenitor cells	NA		A130						NA									NA		NA	NA	NA	stranded > 0.65	0.688889	8868042	100	48	58.078	100	8868042	200	6852440	77.27	191.17	4579867	4536091	4544784	30078	2204	2801	0.74	0.01	1.55
SRR7236968	PRJNA473835	SAMN09284842	Illumina HiSeq 4000		CD34+	CD34+ hematopoietic stem/progenitor cells	NA		A131						NA									NA		NA	NA	NA	stranded > 0.65	0.677105	9998983	100	48	58.5396	100	9998983	200	7806355	78.07	191.82	5170354	5118677	5131180	33573	2997	2604	0.75	0.01	1.52
SRR7236974	PRJNA473835	SAMN09284841	Illumina HiSeq 4000		CD34+	CD34+ hematopoietic stem/progenitor cells	NA		A132						NA									NA		NA	NA	NA	stranded > 0.65	0.693428	11075350	100	49	57.0326	100	11075350	200	8658984	78.18	191.03	5829020	5773197	5783913	37348	3816	3943	0.76	0.01	1.61
SRR7236986	PRJNA473835	SAMN09284839	Illumina HiSeq 4000		CD34+	CD34+ hematopoietic stem/progenitor cells	NA		A134						NA									NA		NA	NA	NA	stranded > 0.65	0.66295	9341542	100	47	66.5461	100	9341542	200	7429944	79.54	192.77	4166889	4124726	4132907	29096	2422	2464	0.71	0.01	1.54
SRR7236998	PRJNA473835	SAMN09284837	Illumina HiSeq 4000		CD34+	CD34+ hematopoietic stem/progenitor cells	NA		A136						NA									NA		NA	NA	NA	stranded > 0.65	0.694422	7946048	100	48	57.828	100	7946048	200	6194351	77.96	190.99	4410967	4377900	4378433	27604	2731	2199	0.75	0.01	1.54
SRR7237010	PRJNA473835	SAMN09284835	Illumina HiSeq 4000		CD34+	CD34+ hematopoietic stem/progenitor cells	NA		A138						NA									NA		NA	NA	NA	stranded > 0.65	0.668751	8514539	100	50	54.6544	100	8514539	200	6144415	72.16	191.15	4103763	3978024	4075734	23940	2158	1931	0.83	0.01	1.6
SRR7237016	PRJNA473835	SAMN09284834	Illumina HiSeq 4000		CD34+	CD34+ hematopoietic stem/progenitor cells	NA		A139						NA									NA		NA	NA	NA	stranded > 0.65	0.680676	9192996	100	48	60.8794	100	9192996	200	7066184	76.86	191.7	4694573	4648576	4658038	30413	3477	2645	0.77	0.01	1.61
SRR7237022	PRJNA473835	SAMN09284833	Illumina HiSeq 4000		CD34+	CD34+ hematopoietic stem/progenitor cells	NA		A140						NA									NA		NA	NA	NA	stranded > 0.65	0.679355	9075774	100	47	63.538	100	9075774	200	6978932	76.9	191.69	4134836	4086050	4100574	28051	2982	3229	0.74	0.01	1.52
SRR7237028	PRJNA473835	SAMN09284832	Illumina HiSeq 4000		CD34+	CD34+ hematopoietic stem/progenitor cells	NA		A141						NA									NA		NA	NA	NA	stranded > 0.65	0.669371	10155674	100	48	59.1363	100	10155674	200	7834348	77.14	192.18	5020184	4954760	4981361	32858	2766	3199	0.71	0.01	1.55
SRR7237034	PRJNA473835	SAMN09284831	Illumina HiSeq 4000		CD34+	CD34+ hematopoietic stem/progenitor cells	NA		A142						NA				SF3B1				MUT	NA	E622D	17	23	57	stranded > 0.65	0.732624	9994813	100	47	57.8183	100	9994813	200	7731219	77.35	188.82	5154835	5113297	5117237	31933	2741	2924	0.8	0.02	1.5
SRR7237040	PRJNA473835	SAMN09284828	Illumina HiSeq 4000		CD34+	CD34+ hematopoietic stem/progenitor cells	NA		A143						NA									NA		NA	NA	NA	stranded > 0.65	0.658516	8759409	100	49	55.8489	100	8759409	200	7032905	80.29	192.64	4805103	4758415	4769759	28544	2663	4137	0.67	0.01	1.51
SRR7237046	PRJNA473835	SAMN09284827	Illumina HiSeq 4000		CD34+	CD34+ hematopoietic stem/progenitor cells	NA		A145						NA									NA		NA	NA	NA	stranded > 0.65	0.673902	8243256	100	49	60.5465	100	8243256	200	6792442	82.4	192.35	4625937	4585139	4590786	29249	3478	2424	0.64	0.01	1.53
SRR7237058	PRJNA473835	SAMN09284825	Illumina HiSeq 4000		CD34+	CD34+ hematopoietic stem/progenitor cells	NA		A147						NA				SF3B1				MUT	NA	K700E	13	8	38	stranded > 0.65	0.706819	9185097	100	53	37.2507	100	9185097	200	6008354	65.41	189.38	4473344	4439659	4445805	23556	2257	1726	0.73	0.01	1.47
SRR7237064	PRJNA473835	SAMN09284824	Illumina HiSeq 4000		CD34+	CD34+ hematopoietic stem/progenitor cells	NA		A148						NA									NA		NA	NA	NA	stranded > 0.65	0.697693	8557508	100	48	59.1143	100	8557508	200	6650357	77.71	190.67	4345342	4301855	4313881	26542	2190	2729	0.67	0.01	1.5
SRR7237070	PRJNA473835	SAMN09284823	Illumina HiSeq 4000		CD34+	CD34+ hematopoietic stem/progenitor cells	NA		A149						NA				SF3B1				MUT	NA	K700E	29	21	42	stranded > 0.65	0.688423	8532587	100	48	58.2582	100	8532587	200	6707603	78.61	191.14	4645888	4600302	4611351	29262	2731	2544	0.66	0.01	1.5
SRR7237076	PRJNA473835	SAMN09284822	Illumina HiSeq 4000		CD34+	CD34+ hematopoietic stem/progenitor cells	NA		A150						NA				SF3B1				MUT	NA	K700E	40	24	38	stranded > 0.65	0.673063	8702766	100	50	53.2878	100	8702766	200	7064497	81.18	192.13	5504403	5461968	5466082	32688	3202	2431	0.64	0.01	1.48
SRR7237082	PRJNA473835	SAMN09284821	Illumina HiSeq 4000		CD34+	CD34+ hematopoietic stem/progenitor cells	NA		A151						NA				SF3B1				MUT	NA	R625L	14	13	48	stranded > 0.65	0.70887	9627793	100	49	51.0276	100	9627793	200	7343413	76.27	189.88	5615848	5556542	5574521	35048	3258	3021	0.68	0.01	1.5
SRR7237088	PRJNA473835	SAMN09284820	Illumina HiSeq 4000		CD34+	CD34+ hematopoietic stem/progenitor cells	NA		A153						NA				SF3B1				MUT	NA	E622D	19	8	30	stranded > 0.65	0.693931	7721539	100	49	54.5997	100	7721539	200	6118444	79.24	190.63	4407288	4373662	4375836	26891	2464	2097	0.67	0.01	1.45
SRR7237094	PRJNA473835	SAMN09284819	Illumina HiSeq 4000		CD34+	CD34+ hematopoietic stem/progenitor cells	NA		A154						NA				SF3B1				MUT	NA	R625L	26	14	35	stranded > 0.65	0.693384	7859857	100	50	51.728	100	7859857	200	5994807	76.27	190.6	4554361	4508072	4522713	27059	2411	2178	0.7	0.01	1.48
SRR7237100	PRJNA473835	SAMN09284818	Illumina HiSeq 4000		CD34+	CD34+ hematopoietic stem/progenitor cells	NA		A155						NA									NA		NA	NA	NA	stranded > 0.65	0.708713	9273396	100	49	52.27	100	9273396	200	6928158	74.71	189.77	4658275	4621992	4626856	26042	2824	2553	0.73	0.02	1.46
SRR7237106	PRJNA473835	SAMN09284817	Illumina HiSeq 4000		CD34+	CD34+ hematopoietic stem/progenitor cells	NA		A156						NA				SRSF2					NA		NA	NA	NA	stranded > 0.65	0.699968	8113852	100	48	56.3064	100	8113852	200	6207965	76.51	190.61	4245109	4209755	4214311	26185	2555	2058	0.68	0.01	1.54
SRR7237112	PRJNA473835	SAMN09284816	Illumina HiSeq 4000		CD34+	CD34+ hematopoietic stem/progenitor cells	NA		A158						NA				SF3B1				MUT	NA	K700E	36	35	49	stranded > 0.65	0.69136	9980844	100	49	53.0248	100	9980844	200	7805240	78.2	190.92	5599861	5555187	5559224	34285	3416	2936	0.67	0.01	1.46
SRR7237130	PRJNA473835	SAMN09284813	Illumina HiSeq 4000		CD34+	CD34+ hematopoietic stem/progenitor cells	NA		A161						NA				U2AF1					NA		NA	NA	NA	stranded > 0.65	0.68843	9943429	100	49	56.7018	100	9943429	200	7675215	77.19	190.99	5060314	4982708	5025503	29629	2520	2662	0.72	0.01	1.5
SRR7237142	PRJNA473835	SAMN09284811	Illumina HiSeq 4000		CD34+	CD34+ hematopoietic stem/progenitor cells	NA		A163						NA									NA		NA	NA	NA	stranded > 0.65	0.657175	10789522	100	48	62.8859	100	10789522	200	8880616	82.31	193.39	5736909	5685569	5692506	36928	4405	3070	0.67	0.01	1.56
SRR7237148	PRJNA473835	SAMN09284810	Illumina HiSeq 4000		CD34+	CD34+ hematopoietic stem/progenitor cells	NA		A164						NA									NA		NA	NA	NA	stranded > 0.65	0.669127	9764622	100	49	59.0531	100	9764622	200	7864110	80.54	192.56	5604418	5556983	5560578	35600	3994	4246	0.64	0.01	1.54
SRR7237154	PRJNA473835	SAMN09284809	Illumina HiSeq 4000		CD34+	CD34+ hematopoietic stem/progenitor cells	NA		A165						NA									NA		NA	NA	NA	stranded > 0.65	0.683925	10154632	100	49	50.379	100	10154632	200	8101409	79.78	191.61	6664350	6614484	6615813	41417	3638	3482	0.64	0.01	1.52
SRR7237160	PRJNA473835	SAMN09284808	Illumina HiSeq 4000		CD34+	CD34+ hematopoietic stem/progenitor cells	NA		A166						NA				SF3B1				MUT	NA	H662Q	25	23	48	stranded > 0.65	0.709503	10669048	100	51	41.7858	100	10669048	200	8374345	78.49	190.21	7898652	7852867	7848068	43490	4073	3021	0.62	0.01	1.65
SRR7237166	PRJNA473835	SAMN09284807	Illumina HiSeq 4000		CD34+	CD34+ hematopoietic stem/progenitor cells	NA		A167						NA				SF3B1				MUT	NA	K700E	18	11	38	stranded > 0.65	0.706962	9723376	100	49	52.4692	100	9723376	200	7476316	76.89	190.05	5254960	5202416	5218505	30665	3011	2779	0.64	0.01	1.54
SRR7237172	PRJNA473835	SAMN09284806	Illumina HiSeq 4000		CD34+	CD34+ hematopoietic stem/progenitor cells	NA		A168						NA									NA		NA	NA	NA	stranded > 0.65	0.683837	9159415	100	49	57.2287	100	9159415	200	7307965	79.79	191.48	5128552	5073209	5091796	30101	3268	3387	0.65	0.01	1.5
SRR7237184	PRJNA473835	SAMN09284804	Illumina HiSeq 4000		CD34+	CD34+ hematopoietic stem/progenitor cells	NA		A170						NA				SF3B1				MUT	NA	K700E	40	26	39	stranded > 0.65	0.695895	9960594	100	50	51.2183	100	9960594	200	7442150	74.72	190.95	5582006	5531008	5541942	33874	3408	2782	0.67	0.01	1.62
SRR7237190	PRJNA473835	SAMN09284803	Illumina HiSeq 4000		CD34+	CD34+ hematopoietic stem/progenitor cells	NA		A171						NA									NA		NA	NA	NA	stranded > 0.65	0.715691	10002894	100	50	55.099	100	10002894	200	7572578	75.7	189.42	5262403	5210868	5222476	32913	3384	3630	0.69	0.02	1.58
SRR7237196	PRJNA473835	SAMN09284802	Illumina HiSeq 4000		CD34+	CD34+ hematopoietic stem/progenitor cells	NA		A172						NA				SF3B1				MUT	NA	K700E	24	27	53	stranded > 0.65	0.689899	9593041	100	50	51.8527	100	9593041	200	7518053	78.37	190.89	5625611	5563518	5585915	33213	3244	3239	0.63	0.01	1.62
SRR7237202	PRJNA473835	SAMN09284801	Illumina HiSeq 4000		CD34+	CD34+ hematopoietic stem/progenitor cells	NA		A173						NA									NA		NA	NA	NA	stranded > 0.65	0.694423	9193952	100	48	57.9502	100	9193952	200	7189292	78.2	191.08	4721280	4679666	4685461	30391	2651	2777	0.64	0.01	1.49
SRR7237214	PRJNA473835	SAMN09284792	Illumina HiSeq 4000		CD34+	CD34+ hematopoietic stem/progenitor cells	NA		A175						NA									NA		NA	NA	NA	stranded > 0.65	0.688546	11210839	100	49	58.1942	100	11210839	200	8915467	79.53	191.58	5849896	5791566	5804940	37076	4097	3783	0.63	0.01	1.56
SRR7237220	PRJNA473835	SAMN09284799	Illumina HiSeq 4000		CD34+	CD34+ hematopoietic stem/progenitor cells	NA		A176						NA									NA		NA	NA	NA	stranded > 0.65	0.689024	7479252	100	48	65.0437	100	7479252	200	5942858	79.46	191.52	3835269	3791521	3805642	25439	2353	1835	0.7	0.01	1.63
SRR7237226	PRJNA473835	SAMN09284748	Illumina HiSeq 4000		CD34+	CD34+ hematopoietic stem/progenitor cells	NA		A177						NA				SRSF2					NA		NA	NA	NA	stranded > 0.65	0.718478	7413147	100	49	56.3753	100	7413147	200	5774142	77.89	189.88	4469401	4432931	4435938	28030	2648	2785	0.69	0.01	1.53
SRR7237232	PRJNA473835	SAMN09284797	Illumina HiSeq 4000		CD34+	CD34+ hematopoietic stem/progenitor cells	NA		A178						NA				SF3B1				MUT	NA	E622D	21	11	34	stranded > 0.65	0.727532	7558195	100	48	59.083	100	7558195	200	5818580	76.98	189.12	4043839	4007974	4013864	25404	2528	2043	0.71	0.01	1.64
SRR7237238	PRJNA473835	SAMN09284796	Illumina HiSeq 4000		CD34+	CD34+ hematopoietic stem/progenitor cells	NA		A179						NA									NA		NA	NA	NA	stranded > 0.65	0.715847	7238016	100	48	61.3026	100	7238016	200	5628125	77.76	189.98	4041379	4001922	4010888	25776	2163	2552	0.71	0.01	1.56
SRR7237244	PRJNA473835	SAMN09284795	Illumina HiSeq 4000		CD34+	CD34+ hematopoietic stem/progenitor cells	NA		A180						NA				U2AF1					NA		NA	NA	NA	stranded > 0.65	0.694376	7008260	100	49	59.5974	100	7008260	200	5325840	75.99	190.91	3614374	3579271	3587156	23203	2054	1961	0.69	0.01	1.68
SRR7237250	PRJNA473835	SAMN09284794	Illumina HiSeq 4000		CD34+	CD34+ hematopoietic stem/progenitor cells	NA		A181						NA				SF3B1				MUT	NA	K700E	24	21	47	stranded > 0.65	0.736697	8537322	100	49	57.5908	100	8537322	200	6372788	74.65	188.36	4243002	4197882	4211267	26300	2469	2966	0.72	0.02	1.55
SRR7237256	PRJNA473835	SAMN09284793	Illumina HiSeq 4000		CD34+	CD34+ hematopoietic stem/progenitor cells	NA		A182						NA									NA		NA	NA	NA	stranded > 0.65	0.703411	10024473	100	48	58.8647	100	10024473	200	7610957	75.92	190.49	5065092	5019133	5027037	32774	2374	2907	0.69	0.01	1.54
SRR7237262	PRJNA473835	SAMN09284791	Illumina HiSeq 4000		CD34+	CD34+ hematopoietic stem/progenitor cells	NA		A183						NA				SF3B1				MUT	NA	K700E	31	36	54	stranded > 0.65	0.698199	8214871	100	49	60.1908	100	8214871	200	6474743	78.82	190.81	4515424	4473847	4482193	28105	2836	2290	0.69	0.01	1.61
SRR7237268	PRJNA473835	SAMN09284790	Illumina HiSeq 4000		CD34+	CD34+ hematopoietic stem/progenitor cells	NA		A184						NA									NA		NA	NA	NA	stranded > 0.65	0.692571	8812283	100	49	56.9978	100	8812283	200	6926753	78.6	191.14	4989700	4949090	4953542	31553	2315	2290	0.69	0.01	1.58
SRR7237274	PRJNA473835	SAMN09284789	Illumina HiSeq 4000		CD34+	CD34+ hematopoietic stem/progenitor cells	NA		A185						NA				SF3B1				MUT	NA	K700E	17	9	35	stranded > 0.65	0.714913	7028255	100	51	49.5447	100	7028255	200	5424694	77.18	189.18	4434435	4399756	4404978	25025	2623	1809	0.74	0.01	1.52
SRR7237280	PRJNA473835	SAMN09284787	Illumina HiSeq 4000		CD34+	CD34+ hematopoietic stem/progenitor cells	NA		A186						NA				SRSF2					NA		NA	NA	NA	stranded > 0.65	0.707328	7992428	100	49	57.0667	100	7992428	200	6216499	77.78	190.33	4583404	4547712	4550948	27457	2737	2262	0.66	0.01	1.48
SRR7237286	PRJNA473835	SAMN09284786	Illumina HiSeq 4000		CD34+	CD34+ hematopoietic stem/progenitor cells	NA		A187						NA				U2AF1					NA		NA	NA	NA	stranded > 0.65	0.687553	8742373	100	48	60.7667	100	8742373	200	6883603	78.74	191.45	4602216	4557053	4566755	30441	2525	2495	0.67	0.01	1.59
SRR7237292	PRJNA473835	SAMN09284785	Illumina HiSeq 4000		CD34+	CD34+ hematopoietic stem/progenitor cells	NA		A188						NA									NA		NA	NA	NA	stranded > 0.65	0.728421	7587945	100	50	54.1383	100	7587945	200	5471553	72.11	189.06	3877798	3846551	3850285	22947	2329	2237	0.74	0.02	1.47
SRR7237298	PRJNA473835	SAMN09284784	Illumina HiSeq 4000		CD34+	CD34+ hematopoietic stem/progenitor cells	NA		A189						NA									NA		NA	NA	NA	stranded > 0.65	0.692794	9382148	100	49	59.3285	100	9382148	200	7063056	75.28	191.18	4458757	4412277	4425207	27893	3105	2552	0.67	0.01	1.52
SRR7237304	PRJNA473835	SAMN09284783	Illumina HiSeq 4000		CD34+	CD34+ hematopoietic stem/progenitor cells	NA		A190						NA				SF3B1				MUT	NA	E622D	6	2	25	stranded > 0.65	0.777661	8620810	100	48	58.2846	100	8620810	200	6175654	71.64	185.8	3779512	3743500	3755277	20191	1676	2368	0.89	0.05	1.48
SRR7237310	PRJNA473835	SAMN09284782	Illumina HiSeq 4000		CD34+	CD34+ hematopoietic stem/progenitor cells	NA		A191						NA				U2AF1					NA		NA	NA	NA	stranded > 0.65	0.705658	8055810	100	49	57.2781	100	8055810	200	6341125	78.71	190.31	4168137	4129845	4138078	25938	1860	2261	0.67	0.01	1.6
SRR7237316	PRJNA473835	SAMN09284781	Illumina HiSeq 4000		CD34+	CD34+ hematopoietic stem/progenitor cells	NA		A192						NA				SRSF2					NA		NA	NA	NA	stranded > 0.65	0.722052	5593710	100	49	56.7297	100	5593710	200	4361817	77.98	189.53	3268663	3240831	3245657	19995	1659	1352	0.7	0.01	1.56
SRR7237322	PRJNA473835	SAMN09284780	Illumina HiSeq 4000		CD34+	CD34+ hematopoietic stem/progenitor cells	NA		A193						NA									NA		NA	NA	NA	stranded > 0.65	0.701447	8856576	100	48	60.2679	100	8856576	200	7123511	80.43	190.77	4908618	4861764	4871799	31363	2386	3070	0.67	0.01	1.56
SRR7237328	PRJNA473835	SAMN09284779	Illumina HiSeq 4000		CD34+	CD34+ hematopoietic stem/progenitor cells	NA		A194						NA									NA		NA	NA	NA	stranded > 0.65	0.693286	7696901	100	49	61.8505	100	7696901	200	6062887	78.77	191.11	4017935	3979162	3986788	26084	2725	2338	0.68	0.01	1.53
SRR7237334	PRJNA473835	SAMN09284778	Illumina HiSeq 4000		CD34+	CD34+ hematopoietic stem/progenitor cells	NA		A195						NA									NA		NA	NA	NA	stranded > 0.65	0.716207	7967360	100	49	51.5639	100	7967360	200	5968513	74.91	189.27	4382487	4349068	4351336	26906	1749	2496	0.71	0.01	1.55
SRR7237340	PRJNA473835	SAMN09284777	Illumina HiSeq 4000		CD34+	CD34+ hematopoietic stem/progenitor cells	NA		A196						NA				SF3B1				MUT	NA	K700E	27	33	55	stranded > 0.65	0.709524	8253695	100	50	54.328	100	8253695	200	6475360	78.45	190.01	5020554	4977160	4984943	30293	2787	2531	0.7	0.01	1.51
SRR7237346	PRJNA473835	SAMN09284776	Illumina HiSeq 4000		CD34+	CD34+ hematopoietic stem/progenitor cells	NA		A197						NA				SF3B1				MUT	NA	K700E	30	17	36	stranded > 0.65	0.704018	9098621	100	49	57.821	100	9098621	200	7098530	78.02	190.38	5070395	5027918	5032090	32511	3189	2605	0.66	0.01	1.53
SRR7237352	PRJNA473835	SAMN09284775	Illumina HiSeq 4000		CD34+	CD34+ hematopoietic stem/progenitor cells	NA		A198						NA									NA		NA	NA	NA	stranded > 0.65	0.714592	9192740	100	48	57.6633	100	9192740	200	7042375	76.61	189.91	4857050	4814485	4821185	31178	2297	2390	0.69	0.01	1.55
SRR7237358	PRJNA473835	SAMN09284774	Illumina HiSeq 4000		CD34+	CD34+ hematopoietic stem/progenitor cells	NA		A199						NA				SF3B1				MUT	NA	K700E	22	30	58	stranded > 0.65	0.708827	8262288	100	49	53.8769	100	8262288	200	6317370	76.46	189.91	4918437	4867023	4884579	29327	2712	1819	0.68	0.01	1.48
SRR7237364	PRJNA473835	SAMN09284773	Illumina HiSeq 4000		CD34+	CD34+ hematopoietic stem/progenitor cells	NA		A200						NA				U2AF1					NA		NA	NA	NA	stranded > 0.65	0.695996	9181805	100	48	63.4164	100	9181805	200	7118452	77.53	191.11	4161084	4120832	4131220	25537	2146	2181	0.69	0.01	1.59
SRR7237370	PRJNA473835	SAMN09284772	Illumina HiSeq 4000		CD34+	CD34+ hematopoietic stem/progenitor cells	NA		A203						NA									NA		NA	NA	NA	stranded > 0.65	0.706113	9035845	100	48	63.6672	100	9035845	200	7026030	77.76	190.46	4404483	4358329	4371381	27829	3230	2043	0.71	0.01	1.51
SRR7237376	PRJNA473835	SAMN09284770	Illumina HiSeq 4000		CD34+	CD34+ hematopoietic stem/progenitor cells	NA		A204						NA									NA		NA	NA	NA	stranded > 0.65	0.691905	8480362	100	49	60.0805	100	8480362	200	6738934	79.47	191.26	4763091	4719550	4726972	30875	2883	2361	0.7	0.01	1.55
SRR7237382	PRJNA473835	SAMN09284769	Illumina HiSeq 4000		CD34+	CD34+ hematopoietic stem/progenitor cells	NA		A205						NA				SF3B1				MUT	NA	K666N	10	20	67	stranded > 0.65	0.752248	8495735	100	48	56.2198	100	8495735	200	6309250	74.26	187.25	3987140	3953095	3958237	24352	2044	2507	0.76	0.02	1.52
SRR7237388	PRJNA473835	SAMN09284768	Illumina HiSeq 4000		CD34+	CD34+ hematopoietic stem/progenitor cells	NA		A206						NA									NA		NA	NA	NA	stranded > 0.65	0.697972	9309890	100	48	58.4355	100	9309890	200	6986498	75.04	190.72	4507883	4459853	4474168	28810	2066	2839	0.66	0.01	1.57
SRR7237394	PRJNA473835	SAMN09284767	Illumina HiSeq 4000		CD34+	CD34+ hematopoietic stem/progenitor cells	NA		A207						NA				SRSF2					NA		NA	NA	NA	stranded > 0.65	0.680662	8521869	100	49	61.0069	100	8521869	200	6974733	81.85	192.08	5026576	4984931	4989153	32064	2902	2457	0.68	0.01	1.55
SRR7237400	PRJNA473835	SAMN09284830	Illumina HiSeq 4000		CD34+	CD34+ hematopoietic stem/progenitor cells	NA		A208						NA				SRSF2					NA		NA	NA	NA	stranded > 0.65	0.6786	7617714	100	50	56.5641	100	7617714	200	5910884	77.59	191.82	4245005	4202795	4214915	25963	2205	1922	0.67	0.01	1.46
SRR7237406	PRJNA473835	SAMN09284829	Illumina HiSeq 4000		CD34+	CD34+ hematopoietic stem/progenitor cells	NA		A209						NA									NA		NA	NA	NA	stranded > 0.65	0.714257	8480496	100	49	51.6847	100	8480496	200	6450564	76.06	189.38	4912580	4870174	4877791	29470	2674	2645	0.66	0.01	1.6
SRR7340414	PRJNA473835	SAMN09425670	Illumina HiSeq 4000		Bone marrow granulocytic precursor	Granulocytic precursor	NA		MDS163						NA				SF3B1				MUT	NA	K700E	36	42	54	stranded > 0.65	0.759476	11560146	100	45	73.0329	100	11560146	200	9637455	83.37	192.66	2270320	2224532	2251042	15953	1163	2162	0.48	0.01	1.58
SRR7340420	PRJNA473835	SAMN09425669	Illumina HiSeq 4000		Bone marrow monocytic precursor	Monocytic precursor	NA		MDS155						NA				SF3B1				MUT	NA	K666N	14	23	62	stranded > 0.65	0.802041	10925898	100	44	58.6554	100	10925898	200	9021756	82.57	192.37	2593646	2562707	2571589	18527	1670	1860	0.49	0.01	1.46
SRR7340432	PRJNA473835	SAMN09425667	Illumina HiSeq 4000		Bone marrow monocytic precursor	Monocytic precursor	NA		MDS189						NA				SF3B1				MUT	NA	E622D	31	33	52	stranded > 0.65	0.890383	9883636	100	45	58.6914	100	9883636	200	8217163	83.14	192.11	2336691	2308437	2315412	18194	1456	1629	0.47	0.01	1.46
SRR7340462	PRJNA473835	SAMN09425662	Illumina HiSeq 4000		Bone marrow granulocytic precursor	Granulocytic precursor	NA		MDS189						NA				SF3B1				MUT	NA	E622D	31	14	31	stranded > 0.65	0.865893	10797995	100	45	57.2623	100	10797995	200	8885728	82.29	191.66	2720484	2686562	2701164	16574	1275	1471	0.46	0.01	1.43
SRR7340468	PRJNA473835	SAMN09425661	Illumina HiSeq 4000		Bone marrow monocytic precursor	Monocytic precursor	NA		MDS163						NA				SF3B1				MUT	NA	K700E	19	18	49	stranded > 0.65	0.702227	9551157	100	44	69.7979	100	9551157	200	8119449	85.01	193.64	2320702	2283733	2301129	16001	1506	2066	0.44	0.01	1.62
SRR7340474	PRJNA473835	SAMN09425660	Illumina HiSeq 4000		Bone marrow monocytic precursor	Monocytic precursor	NA		MDS218						NA				SRSF2					NA		NA	NA	NA	stranded > 0.65	0.879694	10104282	100	44	57.8539	100	10104282	200	8402686	83.16	194.46	2440541	2403337	2415334	20895	1665	2647	0.46	0.01	1.54
SRR7340480	PRJNA473835	SAMN09425659	Illumina HiSeq 4000		Bone marrow granulocytic precursor	Granulocytic precursor	NA		MDS218						NA				SRSF2					NA		NA	NA	NA	stranded > 0.65	0.709396	10599706	100	44	70.5745	100	10599706	200	8813342	83.15	193.85	1664576	1624053	1647116	13422	961	3077	0.5	0.01	1.57
SRR7340492	PRJNA473835	SAMN09425657	Illumina HiSeq 4000		Bone marrow granulocytic precursor	Granulocytic precursor	NA		MDS178						NA				SF3B1				MUT	NA	K700E	24	30	56	stranded > 0.65	0.778938	9179452	100	43	72.7555	100	9179452	200	7319180	79.73	187.84	1811871	1783570	1799046	9565	917	2343	0.54	0.02	1.54
SRR7340498	PRJNA473835	SAMN09425656	Illumina HiSeq 4000		Bone marrow granulocytic precursor	Granulocytic precursor	NA		MDS166						NA				SF3B1				MUT	NA	K700E	39	41	51	stranded > 0.65	0.676482	9762040	100	45	72.679	100	9762040	200	8241335	84.42	193.01	2199572	2163247	2184224	12663	1255	1430	0.47	0.01	1.57
SRR7340510	PRJNA473835	SAMN09425654	Illumina HiSeq 4000		Bone marrow monocytic precursor	Monocytic precursor	NA		MDS142						NA				SF3B1				MUT	NA	K700E	42	34	45	stranded > 0.65	1.03921	8343548	100	44	50.24	100	8343548	200	6725854	80.61	194.31	1854259	1827863	1832559	19168	1274	1258	0.48	0.01	1.45
SRR7340528	PRJNA473835	SAMN09425651	Illumina HiSeq 4000		Bone marrow monocytic precursor	Monocytic precursor	NA		MDS152						NA				SRSF2					NA		NA	NA	NA	stranded > 0.65	0.795179	10375517	100	44	63.9158	100	10375517	200	8637624	83.25	193.39	2423082	2366117	2401456	17684	1148	2794	0.49	0.01	1.59
SRR7340534	PRJNA473835	SAMN09425650	Illumina HiSeq 4000		Bone marrow monocytic precursor	Monocytic precursor	NA		MDS178						NA				SF3B1				MUT	NA	K700E	50	21	30	stranded > 0.65	0.751665	9567368	100	45	68.1355	100	9567368	200	8194361	85.65	193.93	2353064	2320244	2331380	17832	1441	2411	0.5	0.01	1.54
SRR7340570	PRJNA473835	SAMN09425681	Illumina HiSeq 4000		Bone marrow monocytic precursor	Monocytic precursor	NA		MDS177						NA				SF3B1				MUT	NA	K700E	58	33	36	stranded > 0.65	0.798294	9180047	100	44	62.1159	100	9180047	200	7615317	82.96	193.74	2107267	2076118	2087615	16168	1265	2219	0.53	0.01	1.49
SRR7340582	PRJNA473835	SAMN09425679	Illumina HiSeq 4000		Bone marrow granulocytic precursor	Granulocytic precursor	NA		MDS155						NA				SF3B1				MUT	NA	K666N	24	41	63	stranded > 0.65	0.834493	9966829	100	43	52.8351	100	9966829	200	7949125	79.76	191.16	2387048	2357629	2366910	15831	1525	2782	0.51	0.01	1.47
SRR7340588	PRJNA473835	SAMN09425678	Illumina HiSeq 4000		Bone marrow monocytic precursor	Monocytic precursor	NA		MDS168						NA				SRSF2					NA		NA	NA	NA	stranded > 0.65	0.831887	10644781	100	44	56.2009	100	10644781	200	8727799	81.99	192.13	2741867	2711615	2718143	18925	1892	2907	0.55	0.01	1.45
SRR7340612	PRJNA473835	SAMN09425682	Illumina HiSeq 4000		Bone marrow monocytic precursor	Monocytic precursor	NA		MDS191						NA				SRSF2					NA		NA	NA	NA	stranded > 0.65	0.727576	10885763	100	49	44.3512	100	10885763	200	8630562	79.28	189.39	6626431	6565561	6590023	28236	4201	3971	0.51	0.03	1.44
SRR7340624	PRJNA473835	SAMN09425676	Illumina HiSeq 4000		Bone marrow granulocytic precursor	Granulocytic precursor	NA		MDS191						NA				SRSF2					NA		NA	NA	NA	stranded > 0.65	0.698284	12085621	100	47	43.2386	100	12085621	200	9556623	79.07	190.07	5890959	5802654	5856586	25044	3714	5615	0.43	0.02	1.49
SRR7340630	PRJNA473835	SAMN09425675	Illumina HiSeq 4000		Bone marrow monocytic precursor	Monocytic precursor	NA		MDS166						NA				SF3B1				MUT	NA	K700E	38	53	58	stranded > 0.65	0.681652	11741361	100	48	52.5331	100	11741361	200	9614030	81.88	191.92	6439524	6372497	6395771	34441	4258	5054	0.41	0.01	1.46
SRR8742061	PRJNA527722	SAMN11158505	Illumina HiSeq 4000	female	bone marrow	bone marrow	78								NA				SF3B1			RCMD	H662Q	NA	H662Q	942	572	38	unstranded	0.553794	123076062	100	52	29.3083	100	123076062	200	104008445	84.51	198.84	74101872	72852561	73582719	438521	55443	25189	0.2	0.01	1.76
SRR8742062	PRJNA527722	SAMN11158504	Illumina HiSeq 4000	female	bone marrow	bone marrow	75								NA				SF3B1			RARS	K666T	NA	K666T	1140	567	33	unstranded	0.552499	133938818	100	52	26.8911	100	133938818	200	114295648	85.33	198.84	82478600	80934036	81921824	474731	54579	27466	0.19	0.01	1.79
SRR8742063	PRJNA527722	SAMN11158503	Illumina HiSeq 4000	male	bone marrow	bone marrow	56								NA				SF3B1			RARS	K700E	NA	K700E	733	376	34	unstranded	0.552493	142123464	100	53	23.6582	100	142123464	200	113306447	79.72	198.85	78706307	77556227	78203206	426740	51105	25256	0.23	0.01	1.72
SRR8742064	PRJNA527722	SAMN11158502	Illumina HiSeq 4000	male	bone marrow	bone marrow	74								NA				SF3B1			RARS	K700E	NA	K700E	782	484	38	unstranded	0.555003	105320029	100	52	30.5085	100	105320029	200	91139857	86.54	198.79	68709914	67689204	68197207	433866	53972	24869	0.24	0.01	1.97
SRR8742065	PRJNA527722	SAMN11158501	Illumina HiSeq 4000	male	bone marrow	bone marrow	62								NA				SF3B1			RCMD-RS	K666N	NA	K666N	837	488	37	unstranded	0.554382	134774197	100	52	27.7608	100	134774197	200	111816559	82.97	198.81	83831570	82755052	83279150	463760	61409	27251	0.24	0.01	1.78
SRR8742066	PRJNA527722	SAMN11158528	Illumina HiSeq 4000	male	bone marrow	bone marrow	76								NA				SRSF2			RCMD		NA		NA	NA	NA	unstranded	0.548549	119681698	100	53	25.4496	100	119681698	200	93793107	78.37	198.73	64545864	63282123	64156769	330974	35736	22385	0.24	0.01	1.88
SRR8742067	PRJNA527722	SAMN11158527	Illumina HiSeq 4000	male	bone marrow	bone marrow	80								NA				SRSF2			RAEB-2		NA		NA	NA	NA	unstranded	0.560504	144865263	100	52	27.4691	100	144865263	200	128016053	88.37	198.7	92679269	90304999	92046394	546464	51249	35162	0.19	0.01	1.82
SRR8742068	PRJNA527722	SAMN11158526	Illumina HiSeq 4000	male	bone marrow	bone marrow	76								NA				SRSF2			RCMD-RS		NA		NA	NA	NA	unstranded	0.546199	127323417	100	53	24.5662	100	127323417	200	100818890	79.18	198.77	70376953	68951299	69932379	376705	44765	23104	0.25	0.01	1.84
SRR8742069	PRJNA527722	SAMN11158525	Illumina HiSeq 4000	female	bone marrow	bone marrow	79								NA				SRSF2			RAEB-1		NA		NA	NA	NA	unstranded	0.558666	124918854	100	52	26.6995	100	124918854	200	104286289	83.48	198.87	70755633	69271347	70342584	355220	33504	24325	0.2	0.01	1.68
SRR8742070	PRJNA527722	SAMN11158524	Illumina HiSeq 4000	male	bone marrow	bone marrow	68								NA				SRSF2			RAEB-1		NA		NA	NA	NA	unstranded	0.556585	88820487	100	52	31.6051	100	88820487	200	73888956	83.19	198.86	51863234	50710507	51516806	298825	27417	20186	0.17	0.01	1.63
SRR8742071	PRJNA527722	SAMN11158523	Illumina HiSeq 4000	male	bone marrow	bone marrow	74								NA				SRSF2			RCMD		NA		NA	NA	NA	unstranded	0.555861	138695656	100	52	27.2369	100	138695656	200	116187588	83.77	198.79	77181615	74714636	76651238	458571	39205	32601	0.2	0.01	1.69
SRR8742072	PRJNA527722	SAMN11158522	Illumina HiSeq 4000	male	bone marrow	bone marrow	71								NA				U2AF1			RCMD		NA		NA	NA	NA	unstranded	0.553955	111120230	100	52	31.0894	100	111120230	200	93681178	84.31	198.79	64099267	62796473	63656730	379007	41257	22273	0.24	0.01	1.79
SRR8742073	PRJNA527722	SAMN11158521	Illumina HiSeq 4000	male	bone marrow	bone marrow	68								NA				U2AF1			RA		NA		NA	NA	NA	unstranded	0.547047	116835310	100	54	24.1765	100	116835310	200	89786787	76.85	198.77	57662127	56202148	57323265	289434	31262	18166	0.21	0.01	1.74
SRR8742074	PRJNA527722	SAMN11158520	Illumina HiSeq 4000	male	bone marrow	bone marrow	69								NA				U2AF1			RAEB-1		NA		NA	NA	NA	unstranded	0.553219	117549569	100	52	27.3315	100	117549569	200	99441095	84.6	198.79	72135937	70909948	71618788	438501	52382	26266	0.19	0.01	1.78
SRR8742075	PRJNA527722	SAMN11158519	Illumina HiSeq 4000	male	bone marrow	bone marrow	56								NA				U2AF1			RCMD		NA		NA	NA	NA	unstranded	0.55659	114754159	100	52	28.409	100	114754159	200	94950891	82.74	198.73	66714014	65570148	66277913	366936	45303	23862	0.2	0.01	1.75
SRR8742076	PRJNA527722	SAMN11158518	Illumina HiSeq 4000	male	bone marrow	bone marrow	70								NA				U2AF1			RAEB-2		NA		NA	NA	NA	unstranded	0.559216	122311522	100	51	32.8833	100	122311522	200	107096492	87.56	198.76	73334943	71675185	72807108	453876	45945	28014	0.21	0.01	1.74
SRR8742077	PRJNA527722	SAMN11158517	Illumina HiSeq 4000	male	bone marrow	bone marrow	75								NA				U2AF1			RAEB-1		NA		NA	NA	NA	unstranded	0.552621	106954263	100	52	29.6461	100	106954263	200	92177724	86.18	198.91	68775108	67887122	68285493	420483	45948	23184	0.17	0.01	1.68
SRR8742078	PRJNA527722	SAMN11158516	Illumina HiSeq 4000	male	bone marrow	bone marrow	48								NA				U2AF1			RAEB-1		NA		NA	NA	NA	unstranded	0.551052	103407706	100	53	30.4253	100	103407706	200	85801853	82.97	198.9	58107728	57059078	57757087	299089	32173	19379	0.21	0.01	1.69
SRR8742079	PRJNA527722	SAMN11158515	Illumina HiSeq 4000	male	bone marrow	bone marrow	74								NA				U2AF1			RCMD-RS		NA		NA	NA	NA	unstranded	0.547337	77481451	100	53	29.6551	100	77481451	200	61132837	78.9	198.77	42380864	41489392	42107536	230798	27717	14813	0.18	0.01	1.69
SRR8742080	PRJNA527722	SAMN11158535	Illumina HiSeq 4000	male	bone marrow	bone marrow	80								NA				ZRSR2			RAEB-1		NA		NA	NA	NA	unstranded	0.552158	135673215	100	51	31.8225	100	135673215	200	115663704	85.25	198.78	71523814	69934740	71086889	382324	30959	23642	0.21	0.01	1.74
SRR8742081	PRJNA527722	SAMN11158534	Illumina HiSeq 4000	male	bone marrow	bone marrow	76								NA				ZRSR2			RCMD		NA		NA	NA	NA	unstranded	0.557677	131472955	100	52	30.0323	100	131472955	200	108896698	82.83	198.75	76627339	75053462	76132694	433411	36445	24789	0.24	0.01	1.82
SRR8742082	PRJNA527722	SAMN11158533	Illumina HiSeq 4000	male	bone marrow	bone marrow	54								NA				ZRSR2			RCMD		NA		NA	NA	NA	unstranded	0.556997	101887359	100	51	32.8581	100	101887359	200	86292383	84.69	198.68	53430621	51711993	53104360	293820	15958	16483	0.26	0.01	1.81
SRR8742083	PRJNA527722	SAMN11158532	Illumina HiSeq 4000	male	bone marrow	bone marrow	62								NA				ZRSR2			RAEB-2		NA		NA	NA	NA	unstranded	0.556267	130511800	100	51	30.5277	100	130511800	200	109909372	84.21	198.81	76685532	75330094	76198007	433140	31165	23220	0.24	0.01	1.67
SRR8742084	PRJNA527722	SAMN11158531	Illumina HiSeq 4000	male	bone marrow	bone marrow	75								NA							RAEB-2		NA		NA	NA	NA	unstranded	0.564058	102791397	100	51	31.5849	100	102791397	200	88852176	86.44	198.94	62093304	60835905	61675112	356296	40940	20956	0.23	0.01	1.73
SRR8742085	PRJNA527722	SAMN11158530	Illumina HiSeq 4000	male	bone marrow	bone marrow	75								NA							RAEB-1		NA		NA	NA	NA	unstranded	0.560092	138439701	100	53	24.8116	100	138439701	200	113952224	82.31	198.92	72167968	69946426	71695504	403233	40325	28906	0.19	0.01	1.71
SRR8742086	PRJNA527722	SAMN11158529	Illumina HiSeq 4000	male	bone marrow	bone marrow	72								NA							RCMD		NA		NA	NA	NA	unstranded	0.559722	90718421	100	51	31.711	100	90718421	200	76208278	84.01	198.58	51449752	50231580	51113719	287781	29138	19114	0.3	0.01	1.72
SRR8742087	PRJNA527722	SAMN11158514	Illumina HiSeq 4000	female	bone marrow	bone marrow	72								NA							RAEB-1		NA		NA	NA	NA	unstranded	0.563999	138648065	100	51	26.0175	100	138648065	200	121890337	87.91	198.97	87660301	85636285	87040155	526815	56530	36801	0.22	0.01	1.72
SRR8742088	PRJNA527722	SAMN11158513	Illumina HiSeq 4000	male	bone marrow	bone marrow	50								NA							RA		NA		NA	NA	NA	unstranded	0.559625	71165011	100	52	28.1215	100	71165011	200	61097548	85.85	198.76	45756720	45274281	45467899	239691	33112	16018	0.2	0.01	1.68
SRR8742089	PRJNA527722	SAMN11158512	Illumina HiSeq 4000	male	bone marrow	bone marrow	76								NA							RAEB-2		NA		NA	NA	NA	unstranded	0.567356	84338783	100	52	27.9779	100	84338783	200	71262180	84.5	198.59	55500643	54721197	55141278	303949	36097	19319	0.2	0.01	1.74
SRR8742090	PRJNA527722	SAMN11158511	Illumina HiSeq 4000	female	bone marrow	bone marrow	65								NA							RAEB-1		NA		NA	NA	NA	unstranded	0.559258	63586296	100	51	23.2534	100	63586296	200	53669053	84.4	198.95	41019528	40261235	40764524	216852	21902	16250	0.21	0.01	1.66
SRR8742091	PRJNA527722	SAMN11158510	Illumina HiSeq 4000	male	bone marrow	bone marrow	71								NA							RA		NA		NA	NA	NA	unstranded	0.561417	70202651	100	51	31.3612	100	70202651	200	60985784	86.87	198.62	45840098	44926629	45549669	245463	27833	17133	0.2	0.01	1.72
SRR8782419	PRJNA528926	SAMN11249823	Illumina HiSeq 2000		bone marrow	mono nuclear cells	NA								NA				SF3B1				K700E	NA	K700E	360	201	36	unstranded	0.554821	38597984	101	50	45.8041	101	38597984	202	33612318	87.08	199.44	22604547	22324046	22438711	138967	19265	7604	0.24	0.01	1.59
SRR8782421	PRJNA528926	SAMN11249822	Illumina HiSeq 2000		bone marrow	mono nuclear cells	NA								NA				SF3B1				K700E	NA	K700E	370	176	32	unstranded	0.555273	34876014	101	49	50.8048	101	34876014	202	30944562	88.73	199.39	20710084	20487798	20557532	128343	17325	6884	0.24	0.01	1.66
SRR8782423	PRJNA528926	SAMN11249836	Illumina HiSeq 2000		bone marrow	mono nuclear cells	NA								NA				SF3B1				D781G	NA	D781G	366	294	45	unstranded	0.554335	31337226	101	48	49.1946	101	31337226	202	27902821	89.04	199.43	18857086	18656434	18728291	107691	14588	6516	0.24	0.01	1.57
SRR8782425	PRJNA528926	SAMN11249835	Illumina HiSeq 2000		bone marrow	mono nuclear cells	NA								NA				SF3B1				H662D	NA	H662D	349	253	42	unstranded	0.556457	36144717	101	49	48.4836	101	36144717	202	32145909	88.94	199.38	22498061	22211413	22336385	137459	16672	7545	0.24	0.01	1.65
SRR8782427	PRJNA528926	SAMN11249834	Illumina HiSeq 2000		bone marrow	mono nuclear cells	NA								NA				SF3B1				K700E	NA	K700E	337	165	33	unstranded	0.556461	30686472	101	48	50.4035	101	30686472	202	27278876	88.9	199.47	18411868	18192477	18279583	112227	14177	5881	0.24	0.01	1.67
SRR8782429	PRJNA528926	SAMN11249833	Illumina HiSeq 2000		bone marrow	mono nuclear cells	NA								NA									NA		NA	NA	NA	unstranded	0.556623	32748798	101	49	51.5062	101	32748798	202	29213812	89.21	199.37	20442387	20190283	20290483	127795	16856	7253	0.25	0.01	1.64
SRR8782431	PRJNA528926	SAMN11249832	Illumina HiSeq 2000		bone marrow	mono nuclear cells	NA								NA									NA		NA	NA	NA	unstranded	0.554227	35260318	101	49	55.7897	101	35260318	202	31522194	89.4	199.42	19115947	18805067	18969865	123439	15063	7580	0.25	0.01	1.61
SRR8782433	PRJNA528926	SAMN11249831	Illumina HiSeq 2000		bone marrow	mono nuclear cells	NA								NA									NA		NA	NA	NA	unstranded	0.560277	31920953	101	49	41.9967	101	31920953	202	27298383	85.52	199.5	19165593	18961914	19037220	108215	13469	6689	0.24	0.01	1.56
SRR8782435	PRJNA528926	SAMN11249830	Illumina HiSeq 2000		bone marrow	mono nuclear cells	NA								NA									NA		NA	NA	NA	unstranded	0.557972	31376905	101	50	52.1901	101	31376905	202	27678809	88.21	199.41	18900206	18688799	18757682	117990	16525	8009	0.3	0.01	1.62
SRR8782437	PRJNA528926	SAMN11249829	Illumina HiSeq 2000		bone marrow	mono nuclear cells	NA								NA									NA		NA	NA	NA	unstranded	0.551074	80264506	101	48	43.0559	101	80264506	202	70262444	87.54	198.7	43939362	43362131	43635059	261744	28687	13872	0.35	0.01	1.76
SRR8782438	PRJNA528926	SAMN11249828	Illumina HiSeq 2000		bone marrow	mono nuclear cells	NA								NA									NA		NA	NA	NA	unstranded	0.550588	78579124	101	49	41.6818	101	78579124	202	69030391	87.85	198.64	44816035	44306278	44507023	260304	34621	14087	0.39	0.01	1.63
SRR8782439	PRJNA528926	SAMN11249827	Illumina HiSeq 2000		bone marrow	mono nuclear cells	NA								NA									NA		NA	NA	NA	unstranded	0.548519	70625782	101	48	46.6807	101	70625782	202	61589663	87.21	198.48	36930945	36463264	36658793	230632	28369	13151	0.4	0.01	1.69
SRR8782440	PRJNA528926	SAMN11249826	Illumina HiSeq 2000		bone marrow	mono nuclear cells	NA								NA									NA		NA	NA	NA	unstranded	0.549973	44717894	101	48	54.5093	101	44717894	202	39840580	89.09	198.76	22893530	22529252	22718032	148847	17657	8994	0.29	0.01	1.61
SRR8782442	PRJNA528926	SAMN11249824	Illumina HiSeq 2000		bone marrow	mono nuclear cells	NA								NA									NA		NA	NA	NA	unstranded	0.553148	52133436	101	48	51.8751	101	52133436	202	47313058	90.75	198.91	27394957	26971348	27186252	175866	22640	10199	0.27	0.01	1.68
SRR8782444	PRJNA528926	SAMN11249825	Illumina HiSeq 2000		bone marrow	mono nuclear cells	NA								NA				SF3B1				D781G	NA	D781G	518	409	44	unstranded	0.549494	56048109	101	48	46.0481	101	56048109	202	49076755	87.56	198.8	29291411	28886991	29088060	173358	21008	8985	0.24	0.01	1.61
SRR9310552	PRJNA549254	SAMN12078005	Illumina HiSeq 2500		Bone marrow mononuclear cells	Bone marrow mononuclear cells	NA								NA	Screening sample		SF3B1 mutated	SF3B1				MUT	NA	K700E	843	567	40	stranded > 0.65	1.04092	102181472	100	48	25.0598	100	102181472	200	91816271	89.86	199.01	49307851	48235022	48946365	301269	33728	26489	0.19	0.01	1.79
SRR9310553	PRJNA549254	SAMN12078004	Illumina HiSeq 2500		Bone marrow mononuclear cells	Bone marrow mononuclear cells	NA								NA	Screening sample		SF3B1 mutated	SF3B1				MUT	NA	H662Q	843	736	47	stranded > 0.65	1.04861	80664070	101	47	30.7079	101	80664070	202	73834578	91.53	200.26	45408314	44309605	45049976	307839	29202	21297	0.18	0.01	1.71
SRR9310554	PRJNA549254	SAMN12078003	Illumina HiSeq 2500		Bone marrow mononuclear cells	Bone marrow mononuclear cells	NA								NA	Screening sample		SF3B1 wildtype						NA		NA	NA	NA	stranded > 0.65	1.04627	84074312	101	47	28.9175	101	84074312	202	76511300	91	200.36	47109345	46116537	46774201	283802	27480	23862	0.18	0.01	1.81
SRR9310555	PRJNA549254	SAMN12078002	Illumina HiSeq 2500		Bone marrow mononuclear cells	Bone marrow mononuclear cells	NA								NA	Screening sample		SF3B1 mutated	SF3B1				MUT	NA	K700E	798	610	43	stranded > 0.65	1.04218	91677408	101	49	26.0548	101	91677408	202	80393848	87.69	200.31	56543309	55687625	56093465	382654	45006	22184	0.2	0.01	1.78
SRR9310556	PRJNA549254	SAMN12078001	Illumina HiSeq 2500		Bone marrow mononuclear cells	Bone marrow mononuclear cells	NA								NA	Screening sample		SF3B1 wildtype						NA		NA	NA	NA	stranded > 0.65	1.05426	87228576	101	48	28.8327	101	87228576	202	79545675	91.19	200.42	53822403	53200236	53441384	327642	31482	21895	0.18	0.01	1.74
SRR9310557	PRJNA549254	SAMN12078000	Illumina HiSeq 2500		Bone marrow mononuclear cells	Bone marrow mononuclear cells	NA								NA	Screening sample		SF3B1 mutated	SF3B1				MUT	NA	K700E	955	753	44	stranded > 0.65	1.05077	88019553	101	47	30.3328	101	88019553	202	81262088	92.32	200.4	56225611	55245601	55794680	369098	39694	22139	0.17	0.01	1.83
SRR9310558	PRJNA549254	SAMN12077998	Illumina HiSeq 2500		Bone marrow mononuclear cells	Bone marrow mononuclear cells	NA								NA	Screening sample		SF3B1 wildtype						NA		NA	NA	NA	stranded > 0.65	1.05262	83065851	101	47	30.9973	101	83065851	202	76323362	91.88	200.39	45453256	44508718	45105487	297745	27097	22927	0.19	0.01	1.73
SRR9310560	PRJNA549254	SAMN12078027	Illumina HiSeq 2500		Bone marrow mononuclear cells	Bone marrow mononuclear cells	NA								NA	Screening sample		SF3B1 mutated	SF3B1				MUT	NA	A745P	918	663	42	stranded > 0.65	1.04686	86519406	101	47	29.3603	101	86519406	202	78493957	90.72	200.45	52243552	51425288	51853178	331387	37429	21558	0.17	0.01	1.68
SRR9310561	PRJNA549254	SAMN12077997	Illumina HiSeq 2500		Bone marrow mononuclear cells	Bone marrow mononuclear cells	NA								NA	Screening sample		SF3B1 wildtype						NA		NA	NA	NA	stranded > 0.65	1.05587	93505079	101	47	26.8503	101	93505079	202	85953668	91.92	200.46	56899105	55894680	56471925	364543	36501	26136	0.18	0.01	1.67
SRR9310562	PRJNA549254	SAMN12078035	Illumina HiSeq 2500		Bone marrow mononuclear cells	Bone marrow mononuclear cells	NA								NA	Screening sample		SF3B1 mutated	SF3B1				MUT	NA	K700E	623	551	47	stranded > 0.65	1.0434	88846394	101	48	29.7514	101	88846394	202	78841618	88.74	199.93	51084611	50397424	50686001	335402	40260	22948	0.19	0.01	1.9
SRR9310563	PRJNA549254	SAMN12078034	Illumina HiSeq 2500		Bone marrow mononuclear cells	Bone marrow mononuclear cells	NA								NA	Screening sample		SF3B1 mutated	SF3B1				MUT	NA	K700E	1267	768	38	stranded > 0.65	1.04478	109818296	101	48	24.9571	101	109818296	202	99004384	90.15	200.41	63469113	62101614	63012506	391118	41063	24426	0.19	0.01	1.82
SRR9310564	PRJNA549254	SAMN12078033	Illumina HiSeq 2500		Bone marrow mononuclear cells	Bone marrow mononuclear cells	NA								NA	Screening sample		SF3B1 mutated	SF3B1				MUT	NA	H662Q	1004	816	45	stranded > 0.65	1.04801	99235174	101	47	28.3639	101	99235174	202	90751562	91.45	200.33	55177501	53974191	54740022	374559	36194	26726	0.19	0.01	1.75
SRR9310565	PRJNA549254	SAMN12078031	Illumina HiSeq 2500		Bone marrow mononuclear cells	Bone marrow mononuclear cells	NA								NA	Screening sample		SF3B1 mutated	SF3B1				MUT	NA	E622V	1311	900	41	stranded > 0.65	1.04224	96177026	101	48	28.6481	101	96177026	202	85205108	88.59	200.22	52797107	51638393	52409247	331162	33346	23352	0.19	0.01	1.78
SRR9310567	PRJNA549254	SAMN12078015	Illumina HiSeq 2500		Bone marrow mononuclear cells	Bone marrow mononuclear cells	NA								NA	Screening sample		SF3B1 mutated	SF3B1				MUT	NA	R625C	1073	572	35	stranded > 0.65	1.05309	104068225	101	48	27.9588	101	104068225	201	94334796	90.65	199.7	58856511	57546201	58420981	372097	34731	28702	0.18	0.01	1.69
SRR9310568	PRJNA549254	SAMN12078013	Illumina HiSeq 2500		Bone marrow mononuclear cells	Bone marrow mononuclear cells	NA								NA	Screening sample		SF3B1 mutated	SF3B1				MUT	NA	R625L	1141	755	40	stranded > 0.65	1.04421	112336617	101	48	28.8697	101	112336617	201	100591467	89.54	199.54	65027764	63907583	64539654	415392	44317	28401	0.18	0.01	1.81
SRR9310569	PRJNA549254	SAMN12078012	Illumina HiSeq 2500		Bone marrow mononuclear cells	Bone marrow mononuclear cells	NA								NA	Screening sample		SF3B1 mutated	SF3B1				MUT	NA	H662Q	1058	824	44	stranded > 0.65	1.05137	101030503	101	47	28.3235	101	101030503	201	93018807	92.07	199.74	63911723	63178413	63422050	412349	48998	28326	0.17	0.01	1.66
SRR9310571	PRJNA549254	SAMN12078010	Illumina HiSeq 2500		Bone marrow mononuclear cells	Bone marrow mononuclear cells	NA								NA	Screening sample		SF3B1 mutated	SF3B1				MUT	NA	K700E	529	432	45	stranded > 0.65	1.04692	63835210	101	48	32.5219	101	63835210	201	57941123	90.77	200.35	35785235	35104945	35511046	232801	25823	15565	0.18	0.01	1.8
SRR9310572	PRJNA549254	SAMN12078009	Illumina HiSeq 2500		Bone marrow mononuclear cells	Bone marrow mononuclear cells	NA								NA	Screening sample		SF3B1 mutated	SF3B1				MUT	NA	H662Q	902	856	49	stranded > 0.65	1.04569	108126149	101	49	26.6793	101	108126149	201	96199017	88.97	199.79	64395711	63475281	63928915	392758	46698	27340	0.19	0.01	1.76
SRR9310573	PRJNA549254	SAMN12078026	Illumina HiSeq 2500		Bone marrow mononuclear cells	Bone marrow mononuclear cells	NA								NA	Screening sample		SF3B1 wildtype						NA		NA	NA	NA	stranded > 0.65	1.06073	94171871	101	48	29.1751	101	94171871	201	84993591	90.25	199.63	53932715	53064318	53506892	369271	30749	25803	0.19	0.01	1.84
SRR9310574	PRJNA549254	SAMN12078008	Illumina HiSeq 2500		Bone marrow mononuclear cells	Bone marrow mononuclear cells	NA								NA	Screening sample		SF3B1 mutated	SF3B1				MUT	NA	K666R	1058	836	44	stranded > 0.65	1.04488	99265212	100-101	49	27.8447	100.647	99265212	201	88078403	88.73	199.94	56625181	55509988	56205996	358077	35657	25451	0.18	0.01	1.83
SRR9310575	PRJNA549254	SAMN12078007	Illumina HiSeq 2500		Bone marrow mononuclear cells	Bone marrow mononuclear cells	NA								NA	Screening sample		SF3B1 mutated	SF3B1				MUT	NA	R625C	1110	709	39	stranded > 0.65	1.04865	93266875	101	47	30.8567	101	93266875	202	84985516	91.12	200.43	53985636	52802655	53578785	349896	34962	21993	0.29	0.01	1.87
SRR9310577	PRJNA549254	SAMN12078023	Illumina HiSeq 2500		Bone marrow mononuclear cells	Bone marrow mononuclear cells	NA								NA	Screening sample		SF3B1 mutated	SF3B1				MUT	NA	K700E	869	910	51	stranded > 0.65	1.04448	106184415	101	48	29.5772	101	106184415	202	95832047	90.25	200.5	60948098	60020905	60485512	385244	50642	26700	0.29	0.01	1.87
SRR9310578	PRJNA549254	SAMN12078022	Illumina HiSeq 2500		Bone marrow mononuclear cells	Bone marrow mononuclear cells	NA								NA	Screening sample		SF3B1 mutated	SF3B1				MUT	NA	K700E	892	886	50	stranded > 0.65	1.05158	97463968	101	48	28.0647	101	97463968	202	88219246	90.51	200.45	62426955	61553488	61967408	391740	43807	24000	0.28	0.01	1.88
SRR9310579	PRJNA549254	SAMN12078021	Illumina HiSeq 2500		Bone marrow mononuclear cells	Bone marrow mononuclear cells	NA								NA	Screening sample		SF3B1 wildtype						NA		NA	NA	NA	stranded > 0.65	1.05059	104868870	101	49	29.495	101	104868870	202	93835649	89.48	200.43	61181143	60425424	60736556	373173	43366	28048	0.29	0.01	1.79
SRR9310581	PRJNA549254	SAMN12078019	Illumina HiSeq 2500		Bone marrow mononuclear cells	Bone marrow mononuclear cells	NA								NA	Screening sample		SF3B1 mutated	SF3B1				MUT	NA	E622D	973	754	44	stranded > 0.65	1.04635	80742477	101	47	31.6929	101	80742477	202	73234197	90.7	200.28	47862893	46716558	47481391	329233	30552	21717	0.29	0.01	1.68
SRR9310582	PRJNA549254	SAMN12078018	Illumina HiSeq 2500		Bone marrow mononuclear cells	Bone marrow mononuclear cells	NA								NA	Screening sample		SF3B1 mutated	SF3B1				MUT	NA	K700E	835	699	46	stranded > 0.65	1.04547	89076594	101	48	31.9275	101	89076594	202	79698410	89.47	200.33	49666193	48520020	49319754	295748	29100	21591	0.3	0.01	1.8
SRR9310583	PRJNA549254	SAMN12078017	Illumina HiSeq 2500		Bone marrow mononuclear cells	Bone marrow mononuclear cells	NA								NA	Screening sample		SF3B1 mutated	SF3B1				MUT	NA	R625C	1405	690	33	stranded > 0.65	1.04697	105377616	101	49	28.2409	101	105377616	202	92395366	87.68	200.14	59281475	57848581	58834678	382183	36048	28566	0.3	0.01	1.66
SRR9336506	PRJNA550044	SAMN12106996	Illumina HiSeq 2500		Blast cell	bone marrow blast cells	NA			untreated					NA				SF3B1				K700E	NA	K700E	354	307	46	unstranded	0.563035	20576759	126	50	29.1498	126	20576759	252	16597426	80.66	249.01	16839870	16584612	16739572	83821	10495	5982	0.31	0.01	1.45
SRR9336509	PRJNA550044	SAMN12106995	Illumina HiSeq 2500		Blast cell	bone marrow blast cells	NA			untreated					NA				SF3B1				K700E	NA	K700E	125	19	13	unstranded	0.53813	19648892	126	44	29.2666	126	19648892	252	14148000	72	247.41	5484827	5361916	5444731	33747	3751	2598	0.31	0.02	1.31
SRR9336512	PRJNA550044	SAMN12106990	Illumina HiSeq 2500		Blast cell	bone marrow blast cells	NA			untreated					NA				SF3B1				K700E	NA	K700E	10	21	68	unstranded	0.54783	21777143	126	48	26.8753	126	21777143	252	13911768	63.88	246.4	9913789	9764137	9859560	44652	5123	4454	0.31	0.01	1.39
SRR9336515	PRJNA550044	SAMN12106994	Illumina HiSeq 2500		Blast cell	bone marrow blast cells	NA			untreated					NA									NA		NA	NA	NA	unstranded	0.566192	22463907	126	45	53.191	126	22463907	252	18866336	83.99	248.18	9694323	9458634	9616843	60914	8624	7942	0.31	0.02	1.54
SRR9336518	PRJNA550044	SAMN12106993	Illumina HiSeq 2500		Blast cell	bone marrow blast cells	NA			untreated					NA									NA		NA	NA	NA	unstranded	0.572633	21049855	126	46	52.0041	126	21049855	252	18663187	88.66	249.48	13713670	13470640	13597908	94789	13026	7947	0.3	0.01	1.53
SRR9336521	PRJNA550044	SAMN12106992	Illumina HiSeq 2500		Blast cell	bone marrow blast cells	NA			untreated					NA				SF3B1				K700E	NA	K700E	39	35	47	unstranded	0.544155	19090160	126	50	30.367	126	19090160	252	13922167	72.93	247.99	9721263	9581192	9678005	35166	4012	4080	0.32	0.01	1.49
SRR9336524	PRJNA550044	SAMN12106991	Illumina HiSeq 2500		Blast cell	bone marrow blast cells	NA			untreated					NA									NA		NA	NA	NA	unstranded	0.569944	22038430	126	48	36.5023	126	22038430	252	17859000	81.04	248.75	17630065	17481774	17488320	116606	17218	7921	0.27	0.01	1.41
[truncated: 52 more columns]

## Sheet: README
Supplemental Table S1. Clinical and technical information on the samples used. Each sheet lists samples used for: i) Iso-Seq long-read transcriptome sequencing; ii) short-read RNA-seq; iii) iCLIP experiment; and iv) list of public RNA-seq reads downloaded from the Short Read Archive.
