# Supplementary material for: Long-read transcriptome sequencing of CLL and MDS patients uncovers molecular effects of SF3B1 mutations
Source: HighWire-hosted journal article supplement (doi:10.1101/gr.279327.124), 2024-09-13
Supplement: Supplemental_Table_S2.xlsx [file Supplemental_Table_S2.xlsx]

## Sheet: union ASEs called in each group
								Cell lines								CLL								MDS
gene	gene_id	chrom	strand	start	end	splice_type	novel	CL_padj	CL_pvalue	CL_mut_PSI	CL_mut_disp	CL_wt_PSI	CL_wt_disp	CL_total_PSI	CL_total_disp	CLL_padj	CLL_pvalue	CLL_mut_PSI	CLL_mut_disp	CLL_wt_PSI	CLL_wt_disp	CLL_total_PSI	CLL_total_disp	MDS_padj	MDS_pvalue	MDS_mut_PSI	MDS_mut_disp	MDS_wt_PSI	MDS_wt_disp	MDS_total_PSI	MDS_total_disp
SEPTIN6	ENSG00000125354.24	chrX	-	119625379	119629317	3AS	False	0.00435091	5.00892e-07	0.591035	0.000218307	0.0406449	8.50128e-07	0.278022	0.0699259	5.52414e-07	2.91107e-11	0.416822	0.0377171	0.0321121	7.20905e-07	0.206965	0.0403637	0.000225432	7.13462e-08	0.419622	0.0236298	0.0280429	0.00021972	0.256997	0.0534825
MAP3K7	ENSG00000135341.18	chr6	-	90560214	90561621	3AS	True	0.00435091	2.10722e-07	0.611058	0.000594266	0.0625636	1.21727e-06	0.329545	0.0626093	5.52414e-07	2.12938e-11	0.619545	0.0279123	0.115373	0.000101159	0.344336	0.0587279	0.000351545	1.48649e-07	0.5734	0.0299537	0.0658127	2.75266e-05	0.356238	0.0667198
PRPF38A	ENSG00000134748.13	chr1	+	52414647	52414761	3AS	True	0.0423033	6.24378e-05	0.265596	0.00375002	0.0280634	4.66222e-05	0.144232	0.0173588	5.88439e-05	1.78727e-08	0.181651	0.0024951	0.0323798	6.24935e-07	0.0962803	0.00610651	5.29115e-05	1.28814e-08	0.236954	0.00444423	0.0303523	2.85016e-06	0.146275	0.0151584
SERBP1	ENSG00000142864.15	chr1	-	67424959	67425082	3AS	False	0.0244554	1.97077e-05	0.755935	0.000735861	0.511617	0.000710613	0.632713	0.0151267	1.59711e-05	2.80545e-09	0.835946	0.00646714	0.579589	0.000155995	0.692537	0.0218656	1.39437e-05	1.35784e-09	0.830479	0.00170622	0.51941	0.00110889	0.701581	0.0217278
ENOX2	ENSG00000165675.16	chrX	-	130637404	130656580	3AS	True	0.0452421	7.63902e-05	0.389366	0.00286973	0.83558	0.00110655	0.611172	0.0432632	1.21412e-06	8.53078e-11	0.279263	0.00888814	0.76808	0.000874723	0.550561	0.0520719	0.0133754	2.37707e-05	0.290219	0.0423735	0.809238	1.83708e-05	0.486502	0.0918916
NFYA	ENSG00000001167.14	chr6	+	41073084	41079028	3AS	True	0.00628967	1.44818e-06	0.228261	0.000888178	0		0.0938787	0.0306716	0.0573396	0.000193385	0.178796	0.0243288	0.00414182	6.58546e-05	0.0736702	0.0198565	2.25409e-05	3.29257e-09	0.24964	0.00688106	0.00216576	3.27025e-07	0.138075	0.0278395
RBM18	ENSG00000119446.14	chr9	-	122261498	122264714	3AS	True	0.0674998	0.000142465	0.655483	2.38379e-05	0.940345	0.00141856	0.800141	0.0253494	0.000144789	5.59531e-08	0.703183	0.00707964	0.966747	6.02406e-05	0.859142	0.0200333	0.00122897	7.12063e-07	0.786135	0.00630458	0.961245	1.35089e-06	0.860942	0.010889
OXA1L	ENSG00000155463.14	chr14	+	22768171	22769790	3AS	True	0.179931	0.000828572	0.310773	0.00422495	0.0163016	7.62746e-07	0.160203	0.0287648	5.00619e-05	1.14319e-08	0.474272	0.0186218	0.0646271	2.25849e-06	0.243805	0.0403593	0.00787814	1.05487e-05	0.410543	0.0122999	0.04909	0.00179796	0.249945	0.0504505
SLTM	ENSG00000137776.17	chr15	-	58916999	58932355	3AS	False	0.143473	0.000561582	0.106621	0.00265846	0.0134455	1.33766e-07	0.0605446	0.00324062	0.00390371	4.41797e-06	0.114835	0.00296529	0.017301	8.21861e-05	0.0587532	0.00317216	9.77432e-05	2.61753e-08	0.21113	0.00122626	0.019005	0.000272998	0.132836	0.0159453
ANKHD1	ENSG00000131503.21	chr5	+	140436257	140438493	3AS	False	0.0249466	2.28107e-05	0.68114	0.000774417	0.976751	9.53221e-06	0.837112	0.0272526	0.00170741	1.04549e-06	0.61917	0.0471352	0.974652	0.000202495	0.817126	0.0426771	0.0161083	2.9804e-05	0.66119	0.0285914	0.952146	0.000719832	0.779039	0.0348389
DLST	ENSG00000119689.15	chr14	+	74889349	74889896	3AS	False	0.0249466	2.48901e-05	0.476097	0.00101799	0.0208958	3.60865e-07	0.217204	0.0569394	0.0111535	1.88083e-05	0.462187	0.046059	0.00868128	0.000114733	0.191248	0.0757498	0.011194	1.82587e-05	0.433285	0.0141452	0.0369191	0.00166626	0.275635	0.0597155
COG1	ENSG00000166685.12	chr17	+	73201900	73203023	3AS	True	0.0423033	5.83978e-05	0.828984	4.37977e-06	0.993366	4.35991e-07	0.912189	0.00964744	0.0160406	2.93036e-05	0.804317	0.00933007	0.994273	2.30834e-05	0.916618	0.017068	0.00345172	2.60501e-06	0.76411	0.0130035	1		0.868119	0.0246738
TMEM14C	ENSG00000284936.2	KZ208911.1	+	234125	235453	3AS	False																	2.25409e-05	3.26447e-09	0.688058	0.0034296	0.0198437	4.25418e-06	0.344498	0.106042
DDX5	ENSG00000108654.16	chr17	-	64501891	64502009	3AS	True	0.233815	0.00124718	0.812606	0.00666389	0.187346	0.000120763	0.496616	0.080477	0.00447279	5.5374e-06	0.609223	0.0402121	0.0876879	0.00134748	0.319924	0.0757368	0.00355666	2.85738e-06	0.885256	0.00303534	0.0930371	0.00708713	0.637011	0.0998725
ZNF91	ENSG00000167232.14	chr19	-	23362725	23373741	3AS	True	0.0454584	7.84999e-05	0.852344	2.85197e-05	0.0646678	0.00418385	0.411643	0.117795	2.41262e-05	4.91537e-09	0.711248	0.0382771	0.0450956	0.000238335	0.340964	0.100851
NET1	ENSG00000173848.19	chr10	+	5455118	5456086	3AS	True	0.0369512	4.6216e-05	0.123222	0.000776735	0.00193179	1.28142e-06	0.0580631	0.0080093									1.73574e-07	4.22569e-12	0.177133	0.000590175	0		0.0942025	0.0183092
NONO	ENSG00000147140.17	chrX	+	71297047	71297360	IR	False	0.0452421	7.54965e-05	0.136587	3.40722e-05	0.888505	0.000153957	0.496071	0.107487	0.0272823	6.42174e-05	0.235267	0.0441034	0.877957	0.00594223	0.571373	0.11685	0.00817082	1.13384e-05	0.137572	0.00659624	0.921676	0.00579036	0.333481	0.0820985
SLC3A2	ENSG00000168003.17	chr11	+	62881447	62881892	3AS	True	0.0692291	0.00016903	0.116491	2.69321e-06	0.0112551	1.66026e-06	0.0634858	0.00330638									0.00629013	7.50356e-06	0.100131	0.00116782	0.00826489	8.1922e-05	0.0652356	0.00337765
CEP135	ENSG00000174799.11	chr4	+	56008382	56009734	3AS	True	0.0488508	9.15019e-05	0.348444	3.45077e-05	0		0.158997	0.0372971	0.00390371	4.45716e-06	0.418043	0.0342283	0.0130553	1.25627e-06	0.162016	0.0485061	0.1267	0.000836916	0.412388	0.0259067	0		0.287904	0.0435412
GCC2	ENSG00000135968.21	chr2	+	108485908	108486510	3AS	False									0.00239829	1.95351e-06	0.508929	0.0646114	0.0294474	1.16943e-06	0.235499	0.0713649
ZNF410	ENSG00000119725.20	chr14	+	73892208	73893796	3AS	False	0.218844	0.00113213	0.159017	1.18326e-05	0		0.0869383	0.00698021									0.00812167	1.10725e-05	0.154643	0.00499461	0.00616622	4.22163e-05	0.0976835	0.011476
ZNF91	ENSG00000167232.14	chr19	-	23357714	23362739	PAS	True	0.068944	0.000151506	0.660532	0.00273198	0.047556	0.00298828	0.315824	0.0817476	0.000513788	2.25627e-07	0.504254	0.0380657	0.0398341	0.000411113	0.236821	0.0601544
ZNF91	ENSG00000167232.14	chr19	-	23357714	23362725	PAS	True	0.0897585	0.000271019	0.138503	1.37513e-05	0.69969	4.80269e-05	0.386902	0.050802	9.70703e-06	1.19358e-09	0.221052	0.0300823	0.691172	8.90305e-06	0.460557	0.0648818
FAR2	ENSG00000064763.11	chr12	+	29297200	29307657	3AS	True	0.116031	0.000381582	0.116234	5.76826e-06	0		0.0634433	0.00424555									1.17228e-05	8.56182e-10	0.175032	2.38137e-05	0		0.0729145	0.0113603
VEZT	ENSG00000028203.18	chr12	+	95266632	95270050	3AS	False	0.0843496	0.000229818	0.711245	6.88013e-06	0.507294	0.000588385	0.611582	0.00987145	0.0170876	3.21168e-05	0.761375	0.00446314	0.561704	0.00343833	0.647236	0.0137639	0.00122897	7.18065e-07	0.756797	1.44955e-05	0.554305	7.385e-05	0.672026	0.00951536
USP15	ENSG00000135655.16	chr12	+	62389514	62389633	IR	True									5.88439e-05	1.96391e-08	0.184443	0.00318027	0.878555	3.06021e-05	0.596931	0.0981866	0.0857048	0.000380259	0.0838386	4.73556e-05	0.666667	0.222221	0.236494	0.0351513
ZBED5	ENSG00000236287.8	chr11	-	10855086	10856143	3AS	False	0.0488508	8.90601e-05	0.583182	0.00165967	0.183149	0.00295372	0.380913	0.0384264	3.8445e-06	4.05189e-10	0.580147	0.0258256	0.142264	0.00055042	0.339893	0.047487	0.171227	0.00151284	0.589792	0.0151343	0.304563	0.0231777	0.463692	0.0360214
RWDD4	ENSG00000182552.15	chr4	-	183655961	183658928	3AS	True	0.0874708	0.000248392	0.313215	3.88656e-05	0.04714	0.000387195	0.17578	0.0215671	0.00239829	1.9875e-06	0.24374	0.00967005	0.0333788	3.71665e-05	0.122536	0.0133279	0.0876401	0.000428855	0.291298	0.0307178	0.0449005	0.00121518	0.178438	0.030048
SLC7A7	ENSG00000155465.20	chr14	-	22773224	22773728	PAS	True									0.00171362	1.14384e-06	0.134373	0.00520184	0.00154345	3.11212e-05	0.0528386	0.0106143	0.00403819	3.49305e-06	0.237389	0.0245887	0.000958962	3.60005e-09	0.137458	0.0345747
SLC7A7	ENSG00000155465.20	chr14	-	22773716	22773932	3AS	True									0.00171362	1.09778e-06	0.136331	0.00519945	0.00159048	3.31792e-05	0.0535637	0.0108312	0.00403819	3.51484e-06	0.241737	0.0254724	0.000976119	5.26166e-09	0.139498	0.0354247
UXS1	ENSG00000115652.15	chr2	-	106164784	106166055	3AS	False	0.0897585	0.000278999	0.678486	0.000677687	0.282908	1.60988e-05	0.480417	0.0288094	0.0245219	5.57488e-05	0.56934	0.028829	0.192016	0.00562976	0.362438	0.0455125	0.00978185	1.44817e-05	0.564992	0.00849583	0.251285	0.00351841	0.439124	0.0274963
TRIM37	ENSG00000108395.14	chr17	-	59070947	59075646	3AS	True	0.00691634	1.85787e-06	0.248744	6.85729e-05	0		0.1073	0.0316899	0.0384809	0.000107708	0.148473	0.00976482	0.00151705	2.27394e-08	0.0574411	0.013078	0.188882	0.00193615	0.257242	0.0160875	0		0.152879	0.0350508
SNRPN	ENSG00000128739.23	chr15	+	24962209	24967931	ES	False									0.00829449	1.25301e-05	0.293998	0.0519109	0.0356658	2.33886e-06	0.167564	0.029808	0.000257472	8.91243e-08	0.274642	5.23202e-05	0.022766	3.41014e-06	0.182343	0.0219397
PDHX	ENSG00000110435.12	chr11	+	34931484	34947505	3AS	True									0.000726257	3.44445e-07	0.160177	0.00893959	0		0.0618594	0.0149997	0.182144	0.00177271	0.09148	0.00138104	0.00602339	2.95558e-07	0.0575689	0.00333587
CD2BP2	ENSG00000169217.9	chr16	-	30350770	30351547	PAS	True	0.0353881	4.074e-05	0.321015	1.39498e-05	0		0.133021	0.0356006	0.00274224	2.55298e-06	0.580848	0.0368824	0.029147	0.00010931	0.236768	0.0763206	0.0409056	0.000107552	0.360401	0.0309194	0		0.200238	0.0529433
ZNF561	ENSG00000171469.11	chr19	-	9618166	9619431	3AS	False	0.00923781	4.60845e-06	0.650304	1.73925e-05	0.949977	3.85238e-06	0.797099	0.0226364	0.0275803	6.54033e-05	0.670804	0.0206091	0.90926	0.00105006	0.80875	0.019458	0.0626761	0.000222775	0.537999	0.0159935	0.899731	0.00671358	0.7036	0.0467072
SNW1	ENSG00000100603.14	chr14	-	77737075	77738777	3AS	True									0.0209936	4.24084e-05	0.177109	0.0123407	0.0117145	8.16991e-05	0.0812232	0.0120666	0.000980284	4.77302e-07	0.107207	0.0021584	0.00266841	4.28855e-05	0.0560202	0.00583982
ENOSF1	ENSG00000132199.20	chr18	-	683380	685920	3AS	False	0.218844	0.00113373	0.426324	0.0108361	0.0124236	6.65898e-06	0.196879	0.0512482									0.000142658	4.16764e-08	0.573663	4.77958e-05	0.0337139	5.09838e-06	0.309542	0.0784835
NDRG3	ENSG00000101079.21	chr20	-	36651769	36653723	PAS	True	0.585541	0.00568894	0.181406	0.0135829	0.0030184	6.25413e-08	0.0877435	0.0180994	0.0114547	1.95174e-05	0.165721	0.0116475	0.00456433	2.09516e-05	0.068264	0.0135135	0.0868318	0.000418433	0.209917	0.00521573	0.0050739	5.36637e-05	0.118641	0.0265305
SLC7A7	ENSG00000155465.20	chr14	-	22773224	22773716	PAS	True									0.00226718	1.63281e-06	0.84687	0.00440382	0.970626	4.13843e-07	0.920112	0.00474632	0.0109842	1.68469e-05	0.747806	0.025639	0.983736	1.95468e-07	0.848619	0.025841
TNPO3	ENSG00000064419.13	chr7	-	129005159	129014978	3AS	True	0.0881451	0.000257072	0.11448	0.0008017	0		0.0572329	0.00934859									0.00173263	1.18107e-06	0.245387	0.012702	0		0.148002	0.0375501
ZNF91	ENSG00000167232.14	chr19	-	23362725	23374637	3AS	True	0.581413	0.00558177	0.961071	0.000351586	0.428184	0.000197743	0.854259	0.0198762	0.0023452	1.81258e-06	0.898438	0.00832887	0.257959	0.0078299	0.57432	0.0994855
NSMCE4A	ENSG00000107672.15	chr10	-	121974081	121974873	3AS	True									0.00555454	7.51286e-06	0.457878	0.116124	0.0133263	2.68233e-07	0.226024	0.0922135
TOR1AIP2	ENSG00000169905.13	chr1	-	179865854	179877692	3AS	True	0.0080363	2.7609e-06	0.747967	1.46316e-05	0		0.308305	0.115231
TUT4	ENSG00000134744.14	chr1	-	52436963	52438219	3AS	False	0.17148	0.000756752	0.697745	4.95407e-05	0.470391	3.20425e-05	0.604056	0.0106558	9.36014e-05	3.45277e-08	0.763732	0.0104094	0.422912	1.26831e-05	0.571631	0.0320607
CCDC18-AS1	ENSG00000223745.8	chr1	-	93337483	93338229	3AS	True									5.52414e-07	1.51469e-11	0.291143	0.00955226	0.849713	1.14106e-05	0.608912	0.0638535
WASHC4	ENSG00000136051.15	chr12	+	105120597	105121100	3AS	False	0.876644	0.0155251	0.196856	3.66671e-05	0.0570955	9.75147e-06	0.149422	0.00238231	5.88439e-05	1.86046e-08	0.445569	0.0160123	0.113152	0.000171414	0.250507	0.0283959	0.12725	0.000851929	0.38669	0.0148385	0.0344074	0.00249825	0.269083	0.0292128
RNF2	ENSG00000121481.11	chr1	+	185087640	185091578	3AS	True	0.143473	0.000556948	0.204447	7.00544e-05	0.0159137	0.000192194	0.113252	0.0123867	0.00591578	8.20929e-06	0.297113	0.011451	0.0607682	3.04578e-06	0.165003	0.0176449	0.0326269	8.0631e-05	0.332134	8.63062e-05	0.106463	5.49515e-05	0.23542	0.0126268
PIP5K1B	ENSG00000107242.20	chr9	+	68818545	68822614	3AS	True	1	0.0359224	0.187774	1.41017e-05	0.0172339	1.2322e-06	0.0984988	0.0072999									0.00109997	5.62357e-07	0.113668	0.00146174	0		0.0671	0.00816693
NDRG3	ENSG00000101079.21	chr20	-	36653701	36656359	3AS	True	0.737446	0.0105362	0.190175	0.0136252	0.0080319	0.000288311	0.0937119	0.0191285	0.0118335	2.07864e-05	0.166506	0.0119441	0.00464234	2.13311e-05	0.0686447	0.0135863	0.0857048	0.000386214	0.215	0.00515758	0.00513472	5.37825e-05	0.120548	0.0270207
PPP2R5A	ENSG00000066027.12	chr1	+	212342280	212345802	3AS	True	0.179931	0.000822687	0.228512	0.000912888	0.00564278	1.2501e-07	0.126433	0.0222428	0.0411588	0.00011857	0.504459	0.0333563	0.101636	0.00389909	0.268175	0.0509322	0.000568226	2.62837e-07	0.633458	0.0132968	0.0932809	1.67634e-05	0.400737	0.0757553
GTF2I	ENSG00000263001.7	chr7	+	74716950	74718878	3AS	True	0.0062682	1.09699e-06	0.268712	0.000229054	0.0208539	4.90363e-07	0.136051	0.0178292	0.00211351	1.48028e-06	0.192828	0.00854085	0.00590695	3.04424e-07	0.0783054	0.0138405	0.376559	0.017544	0.15277	0.0195805	0		0.0937326	0.0192095
TBC1D15	ENSG00000121749.15	chr12	+	71921454	71922982	3AS	True																	2.98991e-07	1.45579e-11	0.0979109	4.51047e-05	0		0.0623465	0.00885554
UBC	ENSG00000150991.15	chr12	-	124912050	124912278	IR	True									0.000243815	1.01599e-07	0.894757	0.0244682	0.994713	8.07818e-06	0.946745	0.00716704
UBC	ENSG00000150991.15	chr12	-	124911647	124912050	PAS	True									0.000243815	1.02787e-07	0.103475	0.0237187	0.00524648	7.8962e-06	0.0522654	0.00689617
ELP2	ENSG00000134759.14	chr18	+	36145034	36145947	3AS	True	0.224854	0.00118213	0.115301	0.00114023	0.00328542	1.04049e-07	0.0614687	0.00715903	0.000726257	3.42971e-07	0.205222	0.00441096	0.0252743	5.36581e-05	0.0995344	0.0102793	0.224695	0.00285545	0.173527	5.00297e-05	0.0208632	0.00103123	0.0809395	0.009574
DYNLL1	ENSG00000088986.11	chr12	+	120496216	120496415	3AS	False																	0.00173263	1.13829e-06	0.578404	1.15911e-05	0.122103	1.6954e-05	0.327661	0.0313165
RUBCNL	ENSG00000102445.20	chr13	-	46368615	46368732	3AS	True									1.20075e-05	1.89828e-09	0.149687	0.0107313	0.0250691	1.57218e-05	0.0795618	0.00540541	0.564822	0.0973566	0.134457	0.0128489	0		0.0949018	0.011067
SMNDC1	ENSG00000119953.14	chr10	-	110298790	110300546	3AS	False	0.0843496	0.000223721	0.357096	6.81871e-05	0		0.190911	0.0328253	0.0183195	3.57193e-05	0.224531	0.0307375	0.0299203	6.4239e-07	0.115115	0.0168946	0.0504821	0.000151166	0.221761	0.0127621	0.00748915	1.95282e-06	0.149569	0.0232928
ZFAND5	ENSG00000107372.13	chr9	-	72363606	72364695	3AS	True	0.462061	0.00345761	0.152025	0.00429402	0.00963684	4.50827e-07	0.0836847	0.00880701									0.00883047	1.24688e-05	0.214249	0.0124624	0.017126	3.29411e-05	0.133263	0.019142
TMEM14C	ENSG00000111843.14	chr6	+	10723241	10724569	3AS	False																	0.00173263	1.15408e-06	0.669731	0.0204518	0.028008	1.05467e-06	0.348252	0.100907
NDRG3	ENSG00000101079.21	chr20	-	36651769	36653701	PAS	True	0.885374	0.0159346	0.782133	0.00945103	0.962942	0.000308078	0.873101	0.0134092	0.00270802	2.46073e-06	0.812793	0.00767909	0.979616	3.41301e-05	0.908449	0.00893415	0.243816	0.00365631	0.764061	0.00539772	0.971274	0.000769213	0.858401	0.022044
CDK8	ENSG00000132964.12	chr13	+	26396354	26397152	3AS	True									0.0306912	7.73601e-05	0.222542	0.0194339	0		0.0914407	0.0328716	0.210875	0.00241466	0.226733	0.00828951	0		0.13361	0.0354446
CD2BP2	ENSG00000169217.9	chr16	-	30351547	30352505	IR	True	0.0221348	1.69882e-05	0.669037	2.54404e-05	1		0.861803	0.0378974	0.00124502	6.92608e-07	0.327486	0.0565824	0.949956	2.26057e-06	0.683103	0.102397	0.0507789	0.000154322	0.593105	0.0476023	1		0.767335	0.0786866
SMNDC1	ENSG00000119953.14	chr10	-	110298790	110303467	3AS	False	0.110912	0.000357521	0.0870243	2.61804e-06	0.0039446	1.37615e-07	0.0460117	0.00260541	0.0215948	4.48196e-05	0.18848	0.0107855	0.0402421	0.000209391	0.103479	0.00791235	0.00345172	2.5425e-06	0.177964	0.00457332	0.0114289	0.000185349	0.102444	0.0136414
GSAP	ENSG00000186088.16	chr7	-	77314489	77320724	3AS	True									1.07808e-05	1.51499e-09	0.377435	0.0258961	0.0240865	0.000118464	0.174358	0.0348215	0.364244	0.0157931	0.374205	0.020948	0.100094	0.0105551	0.266085	0.0352856
WASHC5	ENSG00000164961.16	chr8	-	125038959	125039794	3AS	True	0.0897585	0.000278238	0.157143	0.000628871	0.0141025	1.96722e-07	0.0800662	0.00603943	0.0169261	3.12185e-05	0.133426	0.00483686	0.0142305	9.07463e-05	0.0623713	0.00503364	0.091999	0.000465863	0.225556	0.0133297	0.0267926	0.00343313	0.138751	0.0265904
SUN1	ENSG00000164828.18	chr7	+	849603	849922	3AS	True	0.00959708	5.52424e-06	0.240391	2.08572e-05	0.0166107	2.71181e-07	0.119667	0.0138169	0.00230728	1.70222e-06	0.447176	0.0155856	0.0309975	8.97994e-05	0.169565	0.0394195
STAU2	ENSG00000040341.18	chr8	-	73709162	73738283	3AS	False	0.173693	0.000773181	0.352092	6.76842e-05	0.0535464	1.1056e-05	0.214959	0.0240607	0.137066	0.000840273	0.356455	0.0419023	0.0462479	0.00108119	0.181736	0.0408347	0.00355666	2.78407e-06	0.509656	6.01943e-05	0.0347269	0.00815983	0.255824	0.0450609
ZBED5	ENSG00000236287.8	chr11	-	10852796	10855118	PAS	True	0.0062682	1.20269e-06	0.38254	6.56324e-06	0.110173	0.000160095	0.246255	0.0187762	5.88439e-05	1.59083e-08	0.47991	0.0206763	0.100549	0.00100304	0.267735	0.0363632	0.327486	0.00937498	0.488256	0.0173154	0.255664	0.0164029	0.381875	0.0319915
ATAD1	ENSG00000138138.13	chr10	-	87759787	87767672	3AS	True									0.00246852	2.12471e-06	0.739948	0.0138066	0.10119	0.000233778	0.380474	0.0974488	0.317469	0.0081743	0.808494	3.51731e-05	0.333333	0.222221	0.656631	0.0590003
GGNBP2	ENSG00000278311.5	chr17	+	36586198	36587024	3AS	True									0.00520037	6.85112e-06	0.896002	0.00190112	0.990064	1.05452e-07	0.952085	0.00343325	0.100777	0.000547117	0.855108	0.00874526	0.981069	0.000128549	0.905768	0.00837139
ZNF548	ENSG00000188785.12	chr19	+	57398429	57401667	PAS	True	0.0164841	1.01211e-05	0.411417	2.21971e-05	0.962456	2.72521e-06	0.688657	0.0771902	0.0362536	9.87073e-05	0.728269	0.0324687	0.902063	5.94255e-06	0.82079	0.0150598	0.101416	0.000570186	0.448976	0.0448376	0.829259	0.00240835	0.600008	0.057607
MYL4	ENSG00000198336.9	chr17	+	47223495	47223676	PAS	True																	0.000314578	1.22535e-07	0.403958	4.3426e-05	0.0141019	4.41039e-06	0.235059	0.0360853
HLTF	ENSG00000071794.16	chr3	-	149041668	149042165	3AS	False	0.346536	0.00220749	0.30821	0.0011712	0.144349	0.000756249	0.232321	0.0081688	0.0184248	3.62482e-05	0.407728	0.0109503	0.0936685	0.00137676	0.216194	0.029927	0.0269655	5.71136e-05	0.362494	1.63883e-05	0.17853	0.0421982	0.28499	0.0177839
PGBD1	ENSG00000137338.5	chr6	+	28281918	28283775	3AS	True	0.0369512	4.67934e-05	0.807383	0.00315104	0.217034	6.27278e-05	0.523371	0.0689318
SLC36A4	ENSG00000180773.15	chr11	-	93154216	93162705	3AS	True									0.0928954	0.000452002	0.553746	0.0690393	0.945384	0.000191018	0.769063	0.0621686	0.0110591	1.75003e-05	0.47642	0.0622123	0.963221	0.00274339	0.687169	0.0920147
TAF2	ENSG00000064313.12	chr8	-	119793451	119795531	ES	True	0.798931	0.0131713	0.144128	0.0101063	0.0230557	6.58939e-07	0.0839086	0.00713861	0.032649	8.43051e-05	0.134257	0.00652228	0.0311574	7.23782e-07	0.0719635	0.00339077	0.236931	0.00344412	0.249028	0.0453703	0.0097	5.7875e-07	0.134065	0.0379822
ZNF410	ENSG00000119725.20	chr14	+	73892107	73893796	IR	False									0.0790424	0.000352183	0.543368	0.0449506	0.0625506	8.12268e-06	0.290762	0.0703134	0.0497814	0.000147856	0.529312	0.0434812	0.0512331	1.22249e-05	0.365843	0.0651715
BUB1B	ENSG00000156970.13	chr15	+	40200980	40202404	3AS	True	0.11753	0.000401402	0.202348	0.00191272	0.0329227	0.000220773	0.117004	0.00930826	0.39509	0.00792554	0.101175	0.00156098	0.00806155	5.72953e-07	0.0541329	0.00240945	0.0119487	2.01201e-05	0.279802	0.00722208	0.0293947	8.77484e-07	0.176672	0.0203917
RDX	ENSG00000137710.17	chr11	-	110257913	110258105	3AS	True									0.0669668	0.000265021	0.246519	0.011754	0		0.0862169	0.0254579	0.229207	0.00304679	0.171744	0.016663	0		0.0950666	0.0192841
ITFG1	ENSG00000129636.13	chr16	-	47313823	47365787	3AS	True									0.00582013	7.97433e-06	0.242424	0.0156458	0.0278962	6.63186e-05	0.119832	0.0148431	0.0631082	0.000227715	0.164485	0.00884074	0.00621852	2.19347e-07	0.0974927	0.0122101
USP15	ENSG00000135655.16	chr12	+	62389514	62389633	3AS	True									0.000937584	4.77612e-07	0.856284	0.00225944	0.992509	5.45626e-05	0.938922	0.00779084	0.158296	0.00125632	0.93833	0.00139509	0.994389	3.17312e-05	0.963002	0.00180563
COASY	ENSG00000068120.15	chr17	+	42562219	42562355	IR	False	0.0843496	0.000229564	0.592556	0.00932749	0.962779	1.57255e-06	0.793646	0.0376194	0.552289	0.02849	0.849725	7.20133e-05	0.984368	7.37384e-07	0.930799	0.00078145	0.0287814	6.44632e-05	0.684124	6.2263e-05	0.967695	1.55625e-06	0.817536	0.0193953
SNW1	ENSG00000100603.14	chr14	-	77737095	77738777	IR	True									0.00447279	5.65689e-06	0.278437	0.0645491	0.94614	6.29077e-05	0.617896	0.124507	0.333338	0.010325	0.0550964	0.0163522	0.75	0.187498	0.18434	0.0929501
TOR1AIP2	ENSG00000169905.13	chr1	-	179865854	179877238	3AS	True	0.0249466	2.39712e-05	0.30476	0.000140698	0		0.135189	0.0368145	0.323038	0.00415934	0.244978	0.0493799	0		0.105563	0.0372208
SUN1	ENSG00000164828.18	chr7	+	849603	849831	IR	True	0.068944	0.000153649	0.613138	3.80757e-05	0.93467	5.75508e-06	0.774513	0.0209334	0.00291014	2.81153e-06	0.454386	0.0194306	0.935022	0.00032243	0.78543	0.0471334
GEN1	ENSG00000178295.15	chr2	+	17754345	17759928	3AS	False	0.0265528	2.85306e-05	0.926905	7.22429e-05	0.0578332	0.00284338	0.442668	0.150546
FCRL1	ENSG00000163534.15	chr1	-	157801577	157801914	3AS	False									5.7968e-05	1.42555e-08	0.375794	0.0306603	0.0594012	0.000263492	0.197567	0.0284817
TPT1	ENSG00000133112.17	chr13	-	45337403	45338659	3AS	True																	0.000257472	9.40226e-08	0.100499	4.00052e-05	0.774321	0.0433852	0.312524	0.0750478
YWHAB	ENSG00000166913.13	chr20	+	44901833	44903035	IR	False	0.406999	0.00285816	0.525982	7.12574e-05	0.866738	1.71144e-05	0.640694	0.0151748	3.8445e-06	3.94077e-10	0.485999	0.0391604	0.931621	3.97568e-06	0.733427	0.0526226	0.428391	0.0292458	0.22389	0.0287835	0.544875	0.0272558	0.318056	0.0519948
DNAJC3	ENSG00000102580.15	chr13	+	95725252	95757643	3AS	True	0.737446	0.0105176	0.166683	2.949e-05	0		0.0775264	0.0134599									0.00456508	4.37883e-06	0.332747	0.0132429	0		0.169322	0.0439051
FAM122B	ENSG00000156504.16	chrX	-	134796256	134797120	3AS	True	0.161283	0.000693979	0.655905	0.00501827	0.97431	3.78198e-06	0.819381	0.028204	0.0225154	4.84378e-05	0.860056	0.00711691	0.996356	2.23108e-07	0.942023	0.00980023	0.299394	0.00645057	0.685515	0.0336723	0.959931	3.03605e-06	0.783893	0.0349405
DDHD2	ENSG00000085788.14	chr8	+	38237627	38238106	3AS	True	0.327532	0.00203341	0.828664	0.00355174	0.978578	4.76593e-05	0.904884	0.00886343	0.00412036	4.94927e-06	0.815096	0.0126974	0.966852	5.61082e-05	0.902914	0.00790509	0.541866	0.0826372	0.798604	0.0277177	0.95333	0.00347346	0.852946	0.0245612
SEPTIN2	ENSG00000168385.18	chr2	+	241335212	241335974	3AS	False	0.0708341	0.000182121	0.0826125	1.20366e-06	0.0144121	3.91397e-05	0.0483706	0.00155606									0.0119487	1.99567e-05	0.192167	0.00986206	0.0331873	1.36258e-06	0.124433	0.0143811
YWHAB	ENSG00000166913.13	chr20	+	44901833	44903035	3AS	False									6.02244e-05	2.11577e-08	0.200912	0.0168467	0.800809	0.00290867	0.530785	0.0837923	0.556305	0.0922262	0.206177	0.0346072	0.487576	0.0619857	0.298555	0.0624635
EI24	ENSG00000149547.15	chr11	+	125572569	125575262	3AS	False	0.289239	0.00167601	0.145065	5.57589e-06	0.0260422	3.57544e-07	0.0773625	0.00417189									0.0779354	0.00032095	0.115326	2.55043e-05	0.0183014	7.05255e-07	0.0647128	0.00174232
CNTRL	ENSG00000119397.17	chr9	+	121171548	121173356	3AS	True	0.224854	0.00117799	0.674302	0.00178742	1		0.833866	0.0317369	0.00598913	8.41628e-06	0.732727	0.00994578	0.95747	2.8143e-06	0.869462	0.0133644
UBXN2A	ENSG00000173960.14	chr2	+	23999654	24000821	PAS	True																	0.00553663	5.73196e-06	0.181864	2.58744e-05	0		0.0956851	0.0076996
GGNBP2	ENSG00000275099.2	KI270857.1	+	821693	822519	3AS	True	1	0.182919	0.924034	1.39681e-05	0.969659	2.83816e-06	0.941029	3.91651e-06	0.0669668	0.000274083	0.884427	0.00321691	0.982014	0.000200343	0.941799	0.00378904	0.0745956	0.00029783	0.88237	0.00360259	0.986914	5.38566e-06	0.920011	0.00524133
S100A8	ENSG00000143546.10	chr1	-	153390557	153391040	3AS	True																	5.29115e-05	9.47854e-09	0.122732	0.000229685	0.0567389	0.000174021	0.0939017	0.00134983
VPS8	ENSG00000156931.16	chr3	+	184869528	184870715	3AS	True									0.0117361	2.0203e-05	0.166278	0.00437208	0.00830169	5.40195e-07	0.0649847	0.00823031
ELP2	ENSG00000134759.14	chr18	+	36145034	36145933	IR	True									0.00124502	6.99832e-07	0.229926	0.00774365	0.843054	0.00300597	0.577399	0.0895955
SNHG29	ENSG00000175061.18	chr17	+	16441130	16441356	IR	False	0.929893	0.0180908	0.750244	3.48562e-05	0.970236	0.00107909	0.847593	0.0129255	0.366381	0.00575598	0.798208	0.0346999	0.994058	1.48784e-07	0.915656	0.0237469	0.00173263	1.11206e-06	0.370264	0.00370527	1		0.615343	0.081728
ZC3H11A	ENSG00000058673.17	chr1	+	203795775	203802568	3AS	True	1	0.0701295	0.883735	1.00303e-05	0.975634	3.73322e-06	0.931131	0.0013446	0.0632056	0.000236484	0.560706	0.0648532	0.991853	2.4851e-06	0.82613	0.0733845
BRD9	ENSG00000028310.18	chr5	-	865581	870472	ES	False	0.0249466	2.20156e-05	0.470215	0.00125535	0.0756308	3.38477e-06	0.26581	0.0347421	0.0540689	0.000173782	0.325169	0.0138927	0.0753717	0.00205765	0.183504	0.0220842	0.334689	0.0106732	0.35703	0.0453547	0.0665065	0.0154525	0.241622	0.0578982
DPH5	ENSG00000117543.21	chr1	-	100992740	100995109	3AS	True									0.0757982	0.000326206	0.232371	0.023838	0.00413813	2.10695e-07	0.0912591	0.0270444	0.117941	0.000745741	0.210986	0.0219224	0		0.102294	0.0274462
ZNF107	ENSG00000196247.11	chr7	+	64697367	64699283	PAS	True									0.0245219	5.5997e-05	0.122876	0.00304395	0.0175163	0.000181922	0.0638899	0.00479734	0.0091912	1.32019e-05	0.31434	0.00399866	0.0152024	0.00100302	0.197326	0.0322674
SLC33A1	ENSG00000169359.16	chr3	-	155828377	155829687	3AS	True	0.710264	0.00913285	0.0914265	0.000713229	0.0170355	5.13186e-07	0.0571676	0.00162506	0.0559588	0.000183127	0.0893379	0.0034156	0.0074609	7.49389e-08	0.0425229	0.00307222	0.303933	0.00669635	0.12465	0.0011805	0.0148952	0.000159634	0.0751751	0.00310868
ZC3H11A	ENSG00000058673.17	chr1	+	203801628	203802568	IR	True	0.0522494	0.000105488	0.205236	0.00111586	0.717252	0.0174638	0.47009	0.0629275	0.00318426	3.35603e-06	0.374823	0.0256408	0.86335	0.00250377	0.624927	0.0645612	0.193843	0.00204338	0.1276	0.00445589	0.426216	0.000126274	0.228523	0.0206265
LRRCC1	ENSG00000133739.16	chr8	+	85107399	85109594	3AS	True	0.143487	0.000567143	0.234653	0.00224004	0.015559	1.01247e-05	0.126938	0.0172094	0.470171	0.0140154	0.153871	0.0106647	0.0248718	9.965e-07	0.0826399	0.00777463	0.0868318	0.000415779	0.251229	0.00306236	0.0139174	8.55062e-07	0.138113	0.0164307
NET1	ENSG00000173848.19	chr10	+	5455118	5456064	IR	True	0.0182389	1.18985e-05	0.0650409	1.21087e-06	0.811867	0.0281811	0.444536	0.115232
ZC3H11A	ENSG00000058673.17	chr1	+	203801628	203802651	3AS	True	0.713851	0.00928645	0.980566	0.000190114	0.715549	0.0103545	0.877287	0.0239664	0.0422898	0.00012257	0.924767	0.00624053	0.702196	0.0028806	0.805523	0.0243783	0.343933	0.011671	0.964415	0.000266907	0.80834	2.3754e-05	0.926658	0.00372024
OAS1	ENSG00000089127.14	chr12	+	112908824	112911050	3AS	True									0.0295193	7.2284e-05	0.348464	0.0512682	0.00934547	0.00112372	0.147264	0.0513318	0.0305904	7.14937e-05	0.329583	3.30667e-05	0		0.152213	0.02634
DNAJA2	ENSG00000069345.12	chr16	-	46955362	46957220	PAS	True	1	0.10785	0.920016	0.00170591	0.982885	8.83549e-06	0.946431	0.00183346	0.0120463	2.13718e-05	0.766862	0.0118122	0.967607	0.000464837	0.878955	0.0138593	0.115646	0.000699154	0.746943	0.0144869	0.955834	0.00239876	0.841882	0.0203247
CD72	ENSG00000137101.13	chr9	-	35616270	35616599	IR	True									0.000896858	4.41111e-07	0.543139	0.0255245	0.993278	1.04123e-07	0.825554	0.0605291
RUBCNL	ENSG00000102445.20	chr13	-	46368627	46368732	IR	True									0.00170741	1.01203e-06	0.785523	0.0350355	0.960457	0.000205571	0.877837	0.0148296
DNAJA2	ENSG00000069345.12	chr16	-	46955362	46955622	PAS	True									0.00344773	3.75484e-06	0.207253	0.0101174	0.0190892	0.000111283	0.102189	0.0122836	0.162143	0.00132352	0.220788	0.0119505	0.0434682	0.00165932	0.140791	0.0153529
BRD9	ENSG00000028310.18	chr5	-	869394	870472	3AS	False	0.0866154	0.000241279	0.984701	4.26013e-07	0.357545	0.000146191	0.746232	0.0795931	0.0483173	0.000142586	0.946188	0.00708741	0.428801	0.000299158	0.72451	0.0846051
THOC1	ENSG00000079134.12	chr18	-	224179	224923	3AS	False	0.211099	0.00107741	0.307951	0.000532195	0.0496443	7.60913e-06	0.180552	0.0171172	0.374193	0.0063077	0.144088	0.0062325	0.0378792	0.000825646	0.0832946	0.00587052	0.0868318	0.000412287	0.241506	0.0117325	0.0348972	2.77455e-05	0.158023	0.0162225
TTK	ENSG00000112742.10	chr6	+	80040703	80042118	3AS	True	0.0991242	0.000311915	0.0823213	6.30572e-06	0.00897545	1.26745e-07	0.0467394	0.00194798									0.0365817	9.35114e-05	0.0928733	0.000775193	0.00907691	0.000116322	0.0562181	0.00238996
SSRP1	ENSG00000149136.9	chr11	-	57333071	57333434	IR	True	0.685311	0.00822121	0.379497	0.0399559	0.750005	0.187496	0.634824	0.115182	0.050545	0.000154709	0.6941	6.61978e-05	0.991791	2.04735e-07	0.874391	0.0358728
ARHGAP25	ENSG00000163219.12	chr2	+	68787956	68807272	ES	True									0.254215	0.00242662	0.118435	0.00731551	0.029896	0.00043684	0.0683386	0.0040964	0.00762307	1.00216e-05	0.234602	0.00759107	0.0177037	0.00022902	0.142523	0.0221774
TTK	ENSG00000112742.10	chr6	+	80042097	80043578	PAS	True	0.0866154	0.000242639	0.0801918	5.14131e-06	0.00884891	1.71508e-07	0.0456229	0.00182246									0.0410724	0.000108991	0.0910429	0.000792253	0.00906117	0.000117007	0.055524	0.00231002
TTK	ENSG00000112742.10	chr6	+	80042118	80042673	PAS	False	0.123737	0.000442003	0.910087	1.8773e-05	0.982319	1.88461e-07	0.945151	0.00143484									0.0359007	9.03749e-05	0.897099	0.000704517	0.988229	1.48914e-05	0.936792	0.00279113
SLTM	ENSG00000137776.17	chr15	-	58888511	58889429	IR	True									0.065567	0.000252245	0.268487	6.68005e-05	0.729067	0.0355952	0.534592	0.0727668
NAA16	ENSG00000172766.19	chr13	+	41372830	41373767	3AS	False	0.278573	0.00156076	0.85506	6.71632e-06	0.99152	7.29693e-07	0.921094	0.00568458	0.0237525	5.34054e-05	0.686774	0.0178158	0.9791	0.000558924	0.861777	0.0296013	0.382228	0.0185846	0.791364	0.0192481	0.98305	2.70219e-06	0.864589	0.0177336
MAP3K7	ENSG00000135341.18	chr6	-	90515109	90515907	IR	True									0.036536	0.000100118	0.312811	0.043225	0.845415	0.00427125	0.595876	0.0839135
CCDC18-AS1	ENSG00000223745.8	chr1	-	93337483	93338229	IR	True	0.916816	0.0174856	0.750342	7.01446e-05	0.974328	6.58742e-06	0.866629	0.00983234	2.41262e-05	5.08554e-09	0.640463	0.0108646	0.950159	0.000328896	0.819419	0.0243239
ECT2	ENSG00000114346.14	chr3	+	172755374	172756982	ES	False	0.0423033	6.49347e-05	0.34734	0.00864313	0.0499082	7.39978e-06	0.199376	0.0244925	0.518153	0.0224711	0.148938	0.00314369	0.0154124	8.88104e-07	0.0806344	0.00558911	0.152458	0.00115096	0.374677	0.0213026	0.0691174	0.0049714	0.240354	0.0388111
ZBED5	ENSG00000236287.8	chr11	-	10852796	10855086	PAS	True	0.879263	0.0157572	0.284021	0.00440204	0.51024	0.00713532	0.397008	0.0178696	0.0944506	0.000463994	0.345357	0.017529	0.598997	0.00959273	0.490029	0.0284727	0.187289	0.00188766	0.339673	0.011077	0.581005	0.0162904	0.433939	0.0259048
ZC3H11A	ENSG00000058673.17	chr1	+	203801628	203802956	3AS	False	0.00910871	4.1945e-06	0.841643	1.72061e-06	0.323737	0.0241241	0.571704	0.0656732	0.0106445	1.7389e-05	0.724183	0.0315904	0.344731	0.00540816	0.516245	0.0550855	0.497293	0.0521712	0.680749	0.0220243	0.418196	0.0421016	0.582367	0.0393831
LINC00847	ENSG00000245060.8	chr5	+	180837105	180839801	PAS	True									0.0828376	0.000382296	0.80208	0.0312625	0.153913	0.10183	0.420943	0.150734
FOXP1	ENSG00000114861.23	chr3	-	70970194	70970735	IR	True									0.00706311	1.01736e-05	0.639908	0.0327207	0.986988	0.000962656	0.855801	0.0460331
PTPN7	ENSG00000143851.15	chr1	-	202153835	202154185	3AS	True	0.618362	0.00624081	0.103766	2.23387e-05	0.0211394	2.91022e-07	0.059415	0.00173459	0.304954	0.00363843	0.160133	0.00187097	0.0409445	0.000407353	0.0842754	0.00398898	0.0119487	2.03625e-05	0.207619	2.42229e-05	0.0612717	0.000946703	0.142934	0.00666176
FAR2	ENSG00000064763.11	chr12	+	29270638	29307657	3AS	True																	0.0110591	1.74693e-05	0.910077	0.00179275	0		0.699309	0.0789488
APPL2	ENSG00000136044.12	chr12	-	105208029	105208157	3AS	False	0.915387	0.0173881	0.341911	4.48172e-05	0.16615	0.0479555	0.248928	0.0277816	0.0295193	7.27913e-05	0.319529	0.0254993	0.0658928	9.68786e-06	0.173613	0.0199383	0.0757585	0.000304318	0.30961	0.0382296	0.0234019	9.06078e-07	0.189289	0.0405467
ATF1	ENSG00000123268.9	chr12	+	50780238	50795908	3AS	True	0.911166	0.017238	0.0901589	0.000199902	0.0249271	7.5211e-07	0.0608377	0.000912052	0.049136	0.000146502	0.116833	0.00123123	0.0428648	3.15862e-06	0.0752414	0.00159309	0.317469	0.00821484	0.12587	0.00275665	0.034647	5.19994e-05	0.0885357	0.00348515
IMMT	ENSG00000132305.21	chr2	-	86171312	86173649	3AS	False	0.0423033	6.3155e-05	0.62564	6.82132e-06	0.48599	0.000127806	0.558676	0.00432686	0.0823873	0.000376271	0.5842	0.00541914	0.46899	0.000698925	0.520444	0.00594003	0.0219184	4.21549e-05	0.606303	0.00223251	0.412657	0.0146335	0.52954	0.0162109
TPP2	ENSG00000134900.12	chr13	+	102645009	102646293	3AS	True	0.00435091	4.22849e-07	0.172276	3.59358e-06	0		0.0718792	0.0195241	0.32301	0.00415226	0.245404	0.0707272	0.00652095	0.000207424	0.10608	0.0423446	0.233411	0.00321057	0.223144	0.0192347	0.00743273	1.61141e-06	0.117194	0.0249511
ABCB7	ENSG00000131269.19	chrX	-	75071683	75073688	3AS	False	1	0.0283472	0.122262	2.64089e-05	0.0112418	4.86579e-07	0.063637	0.0043602	0.0536258	0.000170498	0.213016	0.0304231	0.00258756	8.1428e-08	0.0850138	0.0250466	0.307369	0.00685437	0.134768	0.00843619	0.00856056	3.7292e-07	0.0791603	0.00916891
SLC25A13	ENSG00000004864.14	chr7	-	96193183	96208837	ES	True									0.00239829	2.02213e-06	0.329477	0.00951314	0.0175279	0.000531378	0.137366	0.0324121	0.359538	0.0148197	0.214691	0.0210214	0.0353127	0.0113203	0.145253	0.0331297
SMARCA5	ENSG00000153147.6	chr4	+	143545583	143545909	IR	True									0.0608566	0.000218074	0.586219	0.0321165	0.925487	1.95912e-05	0.779561	0.0400282
MALAT1	ENSG00000251562.8	chr11	+	65501437	65501581	IR	True	0.724268	0.00976521	0.757913	0.0332262	1		0.880949	0.0316378	0.065567	0.000253381	0.794617	0.0362271	1		0.920184	0.0279887
TBC1D15	ENSG00000121749.15	chr12	+	71922963	71924310	PAS	True																	5.29115e-05	1.06324e-08	0.0750759	0.000626126	0		0.0402879	0.00349649
NONO	ENSG00000147140.17	chrX	+	71297047	71297376	3AS	False																	5.29115e-05	1.24723e-08	0.0802186	0.00200734	0.000307677	4.59263e-09	0.0445128	0.00531447
TMX3	ENSG00000166479.10	chr18	-	68687765	68689947	ES	True									5.88439e-05	1.91405e-08	0.803168	0.0110986	0.279012	1.56453e-05	0.517666	0.0628114
SYF2	ENSG00000117614.10	chr1	-	25228253	25228997	IR	True									0.0632056	0.000236184	0.788211	0.0319478	1		0.918302	0.0268411
ARHGAP25	ENSG00000163219.12	chr2	+	68787956	68788496	IR	True									0.0170522	3.17506e-05	0.205152	0.0215486	0.866503	4.90542e-05	0.51301	0.115737
TTI1	ENSG00000101407.13	chr20	-	38002776	38006196	3AS	True	0.0265528	2.76733e-05	0.209626	6.1914e-06	0.0061285	1.11468e-07	0.107991	0.01699	0.00288532	2.73687e-06	0.559661	0.00274797	0.0351765	0.000986461	0.261629	0.0864638	0.555111	0.0908256	0.296045	0.0562899	0.0347511	0.00168777	0.17325	0.0533815
ERGIC3	ENSG00000125991.20	chr20	+	35556271	35556972	3AS	False									0.418939	0.00935694	0.166334	0.0167284	0.0198529	0.000563216	0.0863639	0.013451	0.00750732	9.68662e-06	0.280491	0.00342322	0.0224251	2.58923e-06	0.172849	0.0228066
STIM1	ENSG00000167323.11	chr11	+	4082982	4083262	3AS	True	0.0447345	7.20999e-05	0.188171	2.26822e-05	0		0.0991334	0.0184528									0.22171	0.00272099	0.289035	0.00600303	0.0107205	5.74937e-05	0.133821	0.0279235
ECT2	ENSG00000114346.14	chr3	+	172761683	172762415	3AS	True	0.0708341	0.000177019	0.372376	0.0211275	0.0078877	3.55227e-07	0.17874	0.0462147	0.599174	0.0442468	0.147816	0.0338604	0		0.0625492	0.020759	0.247367	0.00387485	0.16116	0.0169268	0.00782442	1.71533e-07	0.103768	0.0163448
ZNF671	ENSG00000083814.13	chr19	-	57722422	57723213	3AS	False									0.0031679	3.19478e-06	0.807075	0.0031878	0.986229	4.64014e-07	0.911368	0.0105021	0.323753	0.0090089	0.866266	0.00974148	1		0.910823	0.00982432
HECTD2	ENSG00000165338.17	chr10	+	91484655	91485179	3AS	True									0.023397	5.18893e-05	0.347041	0.00276049	0.0188638	1.08936e-06	0.146829	0.0301142
ORAI2	ENSG00000160991.16	chr7	+	102433661	102436224	3AS	False																	0.0291474	6.59925e-05	0.617979	5.02897e-05	0.11841	6.38754e-06	0.377749	0.0591242
SETD4	ENSG00000185917.14	chr21	-	36043956	36045581	3AS	True	0.116139	0.000387738	0.250246	2.5612e-05	0		0.133259	0.0151447	0.080407	0.000362989	0.281718	0.0203285	0.00885199	7.92404e-07	0.133649	0.0335443
TFRC	ENSG00000072274.13	chr3	-	196072152	196077063	3AS	True	0.0897585	0.000274912	0.392875	7.64099e-06	0.089252	1.74479e-05	0.261544	0.0173522	0.505676	0.0200785	0.265032	0.00525083	0.10099	0.0414745	0.190188	0.0279931	0.00276318	1.95083e-06	0.601172	0.0249247	0		0.385215	0.0758373
HELLS	ENSG00000119969.15	chr10	+	94545907	94546376	3AS	True	0.0518935	9.95693e-05	0.244059	1.86909e-05	0		0.129286	0.0214486									0.0132177	2.28468e-05	0.353143	6.59004e-05	0		0.172582	0.0364004
MYL4	ENSG00000198336.9	chr17	+	47223057	47223508	3AS	True																	0.00629013	7.4068e-06	0.492144	0.000233893	0.0668909	4.4525e-05	0.32191	0.0399629
ZNF548	ENSG00000188785.12	chr19	+	57398412	57401667	PAS	True	0.0219851	1.60296e-05	0.526637	3.09022e-05	0.0124825	5.33121e-07	0.25861	0.0778259	0.598758	0.0434832	0.179945	0.0473042	0.017049	0.00167021	0.0892961	0.0279418	0.0654252	0.000242103	0.403952	0.0298368	0.043934	0.00541967	0.250823	0.0529654
NUP88	ENSG00000108559.12	chr17	-	5387069	5387385	IR	True									0.0644429	0.000242486	0.504322	0.0417729	0.944489	0.0100341	0.768741	0.0688642
NAA16	ENSG00000172766.19	chr13	+	41373780	41374741	5AS	False	0.497192	0.0041108	0.1592	1.88825e-05	0.0254155	2.39601e-06	0.0961488	0.00424637	0.0268915	6.28251e-05	0.317791	0.0199328	0.0485571	0.000146865	0.15834	0.0228791	0.382599	0.0186475	0.201387	0.0169506	0.0166929	1.49901e-06	0.131433	0.0161065
DYNC1I2	ENSG00000077380.16	chr2	+	171728418	171728702	IR	True									0.00403036	4.67255e-06	0.232902	0.0399143	0.751633	0.000112321	0.4953	0.0758054
FAM122B	ENSG00000156504.16	chrX	-	134796256	134797120	IR	True	0.556787	0.00512793	0.876387	0.00376885	0.992806	1.47463e-07	0.932282	0.0060034	0.023397	5.18537e-05	0.661343	0.012091	0.988584	0.000138354	0.858908	0.0366619	0.345609	0.0120235	0.47397	0.102882	0.920966	0.0256416	0.655314	0.123097
PPM1M	ENSG00000164088.18	chr3	+	52249669	52250594	PAS	False									0.416546	0.00911526	0.459464	0.00010066	0.712248	8.33858e-05	0.642332	0.0103777	0.0745956	0.000295192	0.405831	0.000135038	0.765841	3.83639e-05	0.581732	0.0295459
DZIP3	ENSG00000198919.13	chr3	+	108684341	108686444	3AS	True	0.315138	0.00189864	0.37998	0.00583807	0.0121481	6.6244e-05	0.178185	0.043433	0.0349107	9.25981e-05	0.265748	0.0160327	0.0450384	0.000311862	0.131528	0.0156668
PPP4R3B	ENSG00000275052.5	chr2	-	55574401	55577314	3AS	True									0.00171362	1.1206e-06	0.646951	0.00115351	0.151429	8.62726e-06	0.345535	0.0600215
MYCBP	ENSG00000214114.9	chr1	-	38866999	38873017	3AS	False	1	0.161089	0.843777	0.00728706	0.961458	4.1026e-06	0.898064	0.00635253									0.00405528	3.65287e-06	0.825197	2.34906e-05	0.977759	7.90692e-07	0.901924	0.00511811
LINC01138	ENSG00000274020.4	chr1	-	148432958	148433643	PAS	True									0.0743972	0.000318869	0.333362	8.89585e-05	0.0193604	0.000856273	0.158647	0.0252304
UBXN2A	ENSG00000173960.14	chr2	+	23984831	23999671	3AS	True									0.332848	0.00442196	0.106914	0.00763926	0		0.0474872	0.00688221	0.00569642	6.24061e-06	0.205898	8.42602e-05	0		0.108781	0.0105379
FIG4	ENSG00000112367.12	chr6	+	109825087	109825425	PAS	True									0.017986	3.47531e-05	0.81345	0.00455974	0.902072	0.000148997	0.865445	0.00310182	0.344902	0.0118961	0.534766	0.0736473	0.888086	0.00967522	0.671928	0.0748128
KANSL3	ENSG00000114982.19	chr2	-	96619762	96631311	3AS	True	0.0080363	2.79245e-06	0.426919	1.97056e-05	0		0.172519	0.0619264
ZC3H11A	ENSG00000058673.17	chr1	+	203795794	203802568	3AS	True	1	0.103147	0.880859	0.0147686	0.992548	2.22903e-07	0.935211	0.0101135	0.0462086	0.00013474	0.733746	0.0327694	0.976683	0.00017219	0.869778	0.0229597	0.360305	0.0149631	0.470391	0.0245694	0.863704	4.52337e-05	0.575782	0.0418547
DYRK4	ENSG00000010219.13	chr12	+	4591298	4593001	3AS	True									0.00778104	1.16178e-05	0.401297	0.0588931	0.00691882	6.60467e-07	0.16668	0.0595375
RHNO1	ENSG00000171792.11	chr12	+	2877282	2885282	3AS	False																	0.0452369	0.000127751	0.201905	0.0018888	0.0206243	0.000366963	0.120678	0.0118317
GPCPD1	ENSG00000125772.14	chr20	-	5575515	5575815	IR	True																	0.0626761	0.000221647	0.449184	0.00805811	0.857153	0.122432	0.528674	0.0220171
GALK2	ENSG00000156958.15	chr15	+	49239367	49281986	3AS	True	0.702867	0.00884933	0.141302	1.84856e-05	0.0208826	1.41065e-06	0.084278	0.00162626									0.0236067	4.77009e-05	0.225534	0.00390682	0		0.109507	0.0205918
LYZ	ENSG00000090382.7	chr12	+	69350272	69352211	3AS	True																	0.00122897	7.11288e-07	0.86529	0.000860707	0.182091	5.76734e-05	0.698665	0.0494507
ZNF548	ENSG00000188785.12	chr19	+	57397174	57398429	3AS	False	0.0189469	1.30874e-05	0.565732	3.46186e-05	0.0128156	4.49708e-07	0.271912	0.0852825	0.549685	0.0281271	0.1914	0.0508669	0.0259873	0.000744163	0.10688	0.0253985	0.0924755	0.000472779	0.488806	0.0383389	0.0728555	0.00815937	0.313734	0.0699187
MINDY4	ENSG00000106125.14	chr7	+	30771556	30778431	3AS	True	0.497192	0.00408866	0.409599	1.75884e-05	0.0357665	3.86886e-06	0.209191	0.0377035									0.0326269	8.01924e-05	0.444316	9.39619e-05	0.0169926	6.8478e-07	0.257089	0.0542779
CYLD	ENSG00000083799.18	chr16	+	50780044	50781245	3AS	True																	0.0043879	4.05931e-06	0.154728	0.000647439	0.0140636	0.000109094	0.0913718	0.00912023
RNF20	ENSG00000155827.12	chr9	+	101533914	101535397	3AS	True																	0.000351545	1.54051e-07	0.116442	7.08745e-05	0		0.0636639	0.00460595
ZNF41	ENSG00000147124.12	chrX	-	47456398	47467409	3AS	True	0.0620105	0.0001285	0.660092	1.43257e-05	0.259143	2.50677e-05	0.482709	0.0304747	0.0944506	0.000461471	0.617302	0.0130545	0.329021	0.00203053	0.46624	0.0244462
TPP2	ENSG00000134900.12	chr13	+	102645009	102646279	IR	True	0.00957717	5.14526e-06	0.54917	7.16871e-05	1		0.800573	0.0651595	0.371647	0.0061469	0.465907	0.0758113	0.926642	0.0324145	0.745135	0.111081
SLC7A7	ENSG00000155465.20	chr14	-	22773728	22773932	IR	True									0.030153	7.52118e-05	0.0476118	0.0101674	0.924203	0.0128447	0.443912	0.193617
PPM1M	ENSG00000164088.18	chr3	+	52249322	52249669	3AS	True									0.516737	0.0216697	0.28443	0.030719	0.100023	2.55496e-05	0.169953	0.0168551	0.045407	0.000129336	0.462915	5.50258e-05	0.103795	1.41807e-05	0.265768	0.0286105
STXBP2	ENSG00000076944.16	chr19	+	7639807	7640730	IR	True	1	0.0252542	0.022276	7.4892e-07	0.123785	3.57051e-05	0.0731632	0.000563939	0.050545	0.000152734	0.0135884	4.68215e-06	0.223741	0.00933477	0.14114	0.0163211	0.541531	0.0817993	0.0268906	0.000627665	0.11079	0.0076731	0.0625091	0.00503005
EP400	ENSG00000183495.14	chr12	+	132076593	132077400	IR	True									0.00412036	4.91664e-06	0.0291805	0.00329656	0.140308	0.000455917	0.0828179	0.00674558
SEPTIN7	ENSG00000122545.20	chr7	+	35872766	35873613	IR	True									0.00629897	8.96233e-06	0.379627	0.0087154	0.885143	1.34156e-05	0.677476	0.0598539
MFN1	ENSG00000171109.19	chr3	+	179347810	179348847	3AS	True	0.676148	0.00788783	0.778494	5.49018e-06	0.884662	2.26396e-05	0.826538	0.00249969	0.00124447	6.55804e-07	0.727748	0.00092809	0.865419	0.000297467	0.806931	0.00465128	0.479784	0.044708	0.827516	0.0127906	0.903771	5.54691e-06	0.854211	0.00815997
CDC27	ENSG00000004897.12	chr17	-	47151918	47154671	3AS	False	0.0878181	0.000252748	0.244267	5.89278e-06	0.0853206	0.00103248	0.166863	0.00771538	0.198054	0.0015462	0.122812	0.00306821	0.0433611	0.00023591	0.0749437	0.00238793	0.327508	0.00952721	0.220233	0.00516016	0.109838	0.00143339	0.17591	0.00660106
TMCC2	ENSG00000133069.17	chr1	+	205271795	205273338	PAS	True																	0.00403819	3.53917e-06	0.389647	0.0115332	0.0435252	1.93538e-06	0.272525	0.0376349
RIOK1	ENSG00000124784.9	chr6	+	7393303	7395052	3AS	False	1	0.0516899	0.167559	2.54563e-05	0.0779987	4.96871e-06	0.124969	0.00087334	0.579135	0.0361191	0.169728	0.00693258	0.0909463	0.000892886	0.125583	0.0041766	0.0972197	0.000508867	0.259196	0.0139468	0.0786641	7.88323e-06	0.176563	0.0163789
OXA1L	ENSG00000155463.14	chr14	+	22768171	22769776	IR	True	0.161179	0.000679115	0.830099	4.25481e-05	0.982908	6.92997e-07	0.899744	0.00739339	0.0669668	0.000266438	0.604416	0.0571204	0.95708	0.000536091	0.778111	0.0478006	0.491501	0.0496096	0.438052	0.0640337	0.817242	0.0163461	0.554402	0.0852441
CD72	ENSG00000137101.13	chr9	-	35616270	35616599	3AS	True									0.0137353	2.48509e-05	0.527243	0.0496673	0.983576	5.18453e-07	0.78939	0.0637416
DOCK10	ENSG00000135905.20	chr2	-	224805514	224806125	3AS	True									0.00339677	3.63968e-06	0.6361	0.0166982	0.953745	1.05114e-06	0.828425	0.0269475
PSTPIP1	ENSG00000140368.13	chr15	+	77035563	77035810	3AS	False									0.593391	0.0414828	0.771865	0.00989611	0.933243	0.000703726	0.865667	0.0105591	0.0387492	9.99955e-05	0.67278	0.00389746	0.936867	6.38268e-06	0.760257	0.0202762
ANKHD1	ENSG00000131503.21	chr5	+	140485732	140487005	3AS	False	0.687832	0.00842007	0.946033	2.95725e-06	0.868526	1.35584e-05	0.909097	0.00125437	0.00211351	1.48502e-06	0.940513	0.00226244	0.707923	0.00170433	0.80744	0.0181814	0.426849	0.0287754	0.876793	1.90987e-05	0.765076	0.0165739	0.837087	0.00863164
EP400	ENSG00000183495.14	chr12	+	132076515	132079096	PAS	True									0.00491724	6.39175e-06	0.0220576	0.001789	0.119187	0.000284501	0.0698177	0.00488015
DHX29	ENSG00000067248.10	chr5	-	55270487	55270577	3AS	True	0.068944	0.000157793	0.125576	0.000373501	0.0107165	5.40313e-07	0.0667726	0.00459318									0.750425	0.33522	0.0747148	0.000737661	0.0375648	3.23921e-06	0.0639308	0.000726615
EFTUD2	ENSG00000108883.13	chr17	-	44852562	44853516	3AS	True	0.0423033	6.4129e-05	0.70759	3.07997e-05	0.0500065	1.76838e-05	0.376731	0.0767832	0.566458	0.0325771	0.352709	0.0248348	0.0278883	0.00202343	0.133543	0.0386198
TRIP12	ENSG00000153827.14	chr2	-	229793130	229795178	3AS	True	0.486198	0.00380615	0.546822	0.00824623	0.856895	0.000639638	0.693608	0.0268646	0.700737	0.109525	0.69394	4.79428e-05	0.79566	0.00559201	0.754151	0.00671179	0.0804155	0.000342602	0.499992	9.09325e-05	0.87073	0.0234766	0.637304	0.0484973
FASTKD2	ENSG00000118246.14	chr2	+	206767470	206770127	IR	True									0.0249395	5.73887e-05	0.759576	0.00445696	0.966133	0.00367471	0.868924	0.0261153
PNN	ENSG00000100941.9	chr14	+	39179462	39180514	IR	True	1	0.0703008	0.579669	0.0318438	0.922424	0.00392332	0.722273	0.0461764	0.00481165	6.16998e-06	0.837039	0.00474345	0.990046	0.000113427	0.924933	0.0105571	0.584078	0.112588	0.868497	0.013219	1		0.896339	0.0111057
FOXP1	ENSG00000114861.23	chr3	-	70968381	70970194	PAS	True									0.00390371	4.34276e-06	0.136943	0.007956	0.00234979	2.81596e-05	0.0551451	0.0109695
TMCC2	ENSG00000133069.17	chr1	+	205271255	205271812	3AS	True																	0.00590492	6.61278e-06	0.40756	0.0129534	0.052414	5.813e-06	0.284962	0.0364255
EXOSC10	ENSG00000171824.14	chr1	-	11070973	11072086	3AS	False	1	0.0835504	0.0831331	1.74959e-06	0.0523951	0.000267781	0.0683811	0.000332639	0.00868317	1.34223e-05	0.0881987	0.000290926	0.0429851	5.13432e-07	0.0629321	0.000531901	0.448249	0.0356261	0.133176	0.00224418	0.0636075	0.00228167	0.106157	0.00404757
FCRL1	ENSG00000163534.15	chr1	-	157801591	157801914	IR	True									0.00270802	2.47356e-06	0.04678	1.19341e-05	0.386899	0.00963662	0.206558	0.0339478
ARHGAP9	ENSG00000123329.20	chr12	-	57474968	57475290	IR	True									0.0222224	4.72328e-05	0.249988	0.0492285	0.915717	1.04862e-05	0.661715	0.100943
ARHGAP25	ENSG00000163219.12	chr2	+	68787956	68807272	ME	True									0.0917404	0.000443159	0.879433	0.0097427	0.350848	0.0546943	0.582048	0.0953659	0.313429	0.00753889	0.89997	0.0245568	0.249999	0.187498	0.770886	0.0965483
AASDH	ENSG00000157426.14	chr4	-	56353596	56354038	3AS	True	0.289239	0.00165029	0.186781	0.00535192	0		0.104055	0.0196126									0.0635997	0.0002338	0.14694	0.00212642	0		0.088612	0.00540839
ARMCX5-GPRASP2	ENSG00000271147.8	chrX	+	102640060	102642277	PAS	True									0.00170741	1.04972e-06	0.212819	0.0055449	0		0.0889681	0.0185933
ACSL1	ENSG00000151726.15	chr4	-	184775415	184776883	IR	True																	0.0280927	6.08689e-05	0.0408826	1.56155e-06	0.4	0.239999	0.186002	0.0754085
C1D	ENSG00000197223.12	chr2	-	68047319	68062957	3AS	True																	0.00624809	7.14919e-06	0.257162	0.00157464	0.00355819	3.63035e-07	0.0981283	0.0178496
ELF1	ENSG00000120690.16	chr13	-	40949925	40951328	IR	True									0.0989865	0.000501514	0.289441	0.00760542	0.676863	0.00384672	0.520518	0.0448929
SEPSECS	ENSG00000109618.12	chr4	-	25156974	25158952	3AS	True	0.04273	6.72294e-05	0.52595	2.26046e-05	0.0404275	0.00118002	0.26195	0.0617068	0.594143	0.042173	0.225072	0.098671	0.0134436	2.89525e-06	0.10762	0.0456716
FOXP1	ENSG00000114861.23	chr3	-	70970183	70970735	IR	True									0.0106445	1.72339e-05	0.778892	0.019883	0.995016	6.70795e-08	0.910017	0.0221083
PRPF38B	ENSG00000134186.12	chr1	+	108692867	108693571	IR	True									0.011784	2.04925e-05	0.057487	0.000652842	0.725217	4.39372e-05	0.433143	0.109795
EIF3E	ENSG00000104408.11	chr8	-	108203138	108203400	IR	True									0.00890474	1.39212e-05	0.504298	0.0379217	0.954905	4.1029e-06	0.758339	0.0582654
MMS19	ENSG00000155229.21	chr10	-	97459475	97459658	3AS	True	0.116031	0.000382927	0.910571	1.28881e-06	0.982828	0.000314021	0.946405	0.00255799	0.0208079	4.16677e-05	0.78724	0.00591316	0.990432	2.06086e-07	0.924562	0.011031
SLC4A1AP	ENSG00000163798.13	chr2	+	27688020	27688680	IR	True									0.0853044	0.000398584	0.924806	0.00193804	0.99707	1.09596e-06	0.960979	0.00224751	0.783936	0.401682	0.392959	0.033317	1		0.410488	0.0355763
NUCB2	ENSG00000070081.17	chr11	+	17295467	17296049	3AS	True																	0.011194	1.81175e-05	0.922624	1.51821e-05	0.235317	0.000103213	0.707207	0.0746174
TMX3	ENSG00000166479.10	chr18	-	68687765	68691294	ME	True									0.0384809	0.000108151	0.428079	0.0301856	0.0609312	9.36098e-06	0.211574	0.036364
ARMCX5-GPRASP2	ENSG00000271147.8	chrX	+	102639533	102640060	IR	True									0.0023452	1.80632e-06	0.597222	0.02523	1		0.834937	0.0576826
TPT1	ENSG00000133112.17	chr13	-	45337403	45338659	IR	True	1	0.0690588	0.890077	0.00737783	1		0.941067	0.00701664									0.00553663	5.93076e-06	0.467404	0.00857445	0.843139	0.0692771	0.633652	0.0635267
DNAJA2	ENSG00000069345.12	chr16	-	46955622	46957006	IR	True									0.00239829	2.01855e-06	0.108579	0.00160836	0.677061	0.00582563	0.398947	0.0759796	0.820992	0.472396	0.0663972	0.000152736	0.206479	0.043169	0.0766806	0.000483634
DHX15	ENSG00000109606.13	chr4	-	24537173	24540107	3AS	True									0.00252806	2.22036e-06	0.043602	5.37668e-05	0.144798	0.00166716	0.100985	0.00356709
NAIP	ENSG00000278613.4	GL339449.2	+	424084	426856	3AS	True																	0.047867	0.000141005	0.085847	1.89256e-05	0.570503	0.0646225	0.302994	0.0617414
SUN1	ENSG00000164828.18	chr7	+	849603	849840	IR	True	0.685311	0.00825514	0.887996	1.90654e-05	1		0.951875	0.00403343	0.023397	5.13207e-05	0.737713	0.00184863	0.983869	7.88997e-05	0.913523	0.0139793
ZNF671	ENSG00000083814.13	chr19	-	57722422	57723213	IR	True									0.0604911	0.000209907	0.352302	0.0606921	0.933149	4.51545e-05	0.622068	0.114175
RECQL	ENSG00000004700.16	chr12	-	21474995	21475467	IR	True									0.0967674	0.000485502	0.303956	0.0253809	0.676472	0.0104381	0.501614	0.0493943
XAF1	ENSG00000132530.17	chr17	+	6758224	6759661	ES	False									0.0173858	3.3288e-05	0.158423	0.00822321	0.0295178	0.000198376	0.0849578	0.00635624
MBD4	ENSG00000129071.10	chr3	-	129437965	129439729	IR	True									0.0621827	0.000226103	0.132515	0.000397873	0.793729	0.0656898	0.480542	0.121002
FDPS	ENSG00000160752.15	chr1	+	155308965	155310063	3AS	False	1	0.876056	0.705028	4.81733e-05	0.660736	6.83629e-05	0.683577	6.85498e-05	0.0567758	0.000189489	0.743879	0.00524112	0.462918	5.25597e-05	0.578242	0.0136643	0.387432	0.0196703	0.813938	0.000149971	0.605137	0.000117776	0.7204	0.0105882
CELF2	ENSG00000048740.18	chr10	+	11314258	11321206	3AS	False	1	0.814415	0.160222	0.00130627	0.134705	0.000887455	0.149702	0.00139568	0.00307683	3.02662e-06	0.219157	1.18827e-05	0.123544	2.28935e-06	0.162678	0.00166266	0.633943	0.162466	0.217249	0.0113143	0.115656	0.00502336	0.175575	0.0107177
TMX3	ENSG00000166479.10	chr18	-	68687890	68689054	PAS	False									0.0031679	3.22749e-06	0.119873	0.00103317	0.0199484	8.53913e-05	0.0637619	0.0032852	0.417277	0.026161	0.177004	0.0298482	0.032391	0.00628951	0.113409	0.0239088
ZNF737	ENSG00000237440.9	chr19	-	20534934	20536133	PAS	True									0.00318426	3.34825e-06	0.125321	0.0023636	0.0148565	3.05016e-05	0.0610165	0.00372099
TNFAIP3	ENSG00000118503.15	chr6	+	137867258	137867494	TSS	False	1	0.996733	0.371789	0.000875279	0.370334	0.00118837	0.371399	0.000976432	0.750729	0.16685	0.329596	0.0789192	0.367213	5.16842e-05	0.346681	0.000173168	0.0720158	0.000279358	0.176058	0.0190411	0.368647	1.09162e-05	0.235503	0.0219657
PHKB	ENSG00000102893.16	chr16	+	47461426	47463898	3AS	False	0.985776	0.0215623	0.439531	0.00641275	0.244776	0.00305539	0.345169	0.0137408	0.00412036	4.99403e-06	0.406777	0.0114839	0.198844	0.00107886	0.288647	0.0140516	0.228124	0.00300456	0.420001	1.44241e-05	0.382207	0.0403384	0.410505	0.0117369
ZNF91	ENSG00000167232.14	chr19	-	23362725	23395324	3AS	True	0.78532	0.012469	0.945128	0.00140924	0.305186	0.0771387	0.760169	0.0511744	0.0669668	0.000268045	0.928331	0.0116575	0.466901	0.0239181	0.720827	0.0827853
TMX3	ENSG00000166479.10	chr18	-	68689054	68689947	IR	True									0.00987232	1.56073e-05	0.0940649	0.000369027	0.387123	0.0079607	0.25367	0.0266999	0.732135	0.303717	0.131034	0.0170136	0.372255	0.0307918	0.170547	0.0231511
IRAK3	ENSG00000090376.11	chr12	+	66203893	66208235	3AS	True																	0.00978185	1.45266e-05	0.607415	2.23964e-05	0.0401027	2.42893e-05	0.423692	0.0491916
GTF2IRD2B	ENSG00000174428.18	chr7	+	75135057	75136784	3AS	True									0.0526117	0.000165425	0.374055	0.0146938	0.0887121	0.000420375	0.211629	0.021466
SP140	ENSG00000079263.19	chr2	+	230251061	230253333	3AS	True									0.00447279	5.59792e-06	0.862763	0.00221516	0.658691	0.00452937	0.746738	0.0141874
KPNA1	ENSG00000114030.13	chr3	-	122433788	122437169	3AS	True																	0.00456508	4.4455e-06	0.0883855	0.00281496	0		0.0478824	0.00486985
NDUFAF5	ENSG00000101247.18	chr20	+	13814515	13816451	IR	True									0.0796264	0.000358066	0.583581	2.57185e-05	0.922887	3.99835e-05	0.755614	0.0237331
COPS2	ENSG00000166200.15	chr15	-	49128760	49129476	3AS	True																	0.00486425	4.85525e-06	0.101287	0.00493588	0.00411222	2.54352e-07	0.0590415	0.0057564
TLR2	ENSG00000137462.9	chr4	+	153684360	153701499	ES	True																	0.0268175	5.52573e-05	0.906907	1.57143e-05	0.355939	5.28712e-05	0.772379	0.0415704
UCKL1	ENSG00000198276.16	chr20	-	63945988	63946160	IR	True									0.0411588	0.000118318	0.405732	0.0696361	0.896678	3.95033e-05	0.666009	0.071972
TPR	ENSG00000047410.14	chr1	-	186355768	186356285	3AS	True									0.00537447	7.1749e-06	0.143687	5.07351e-05	0.00272414	7.12224e-08	0.0660477	0.0120773
CDC7	ENSG00000097046.13	chr1	+	91500948	91501653	3AS	True	0.0423033	5.95389e-05	0.18436	1.70969e-05	0.00568101	1.32407e-07	0.0936862	0.0134556									0.145652	0.00107991	0.422979	0.0470609	0.0316872	7.22598e-06	0.263159	0.0612092
SLC4A1AP	ENSG00000163798.13	chr2	+	27688020	27688699	IR	True	0.494112	0.00400083	0.394841	0.0296074	0.0914556	1.01017e-05	0.254176	0.0310822	0.60403	0.0454434	0.453581	0.0406201	0.244701	0.0177831	0.336929	0.037207	0.00553663	5.80357e-06	0.0798837	5.1536e-05	0.0034651	4.97689e-08	0.0517022	0.00184524
GCA	ENSG00000115271.11	chr2	+	162359157	162359493	IR	False									0.0663433	0.000257546	0.135865	0.011832	0.529221	0.0316682	0.358235	0.0602791
ATAD1	ENSG00000138138.13	chr10	-	87756922	87767672	ES	True									0.0110521	1.84432e-05	0.339221	0.0137452	0.112972	0.000715367	0.209579	0.0156267	0.245112	0.00372955	0.209931	0.017749	0.0296518	0.00167966	0.121427	0.0196279
ZFAND5	ENSG00000107372.13	chr9	-	72359521	72364695	ME	True																	0.0230733	4.60611e-05	0.861972	0.0170609	0.44372	0.00467297	0.675528	0.0690616
RSRP1	ENSG00000117616.18	chr1	-	25243633	25245149	3AS	False																	0.00704411	8.77388e-06	0.885162	0.00106929	0.573157	0.120987	0.694861	0.0810756
UQCC1	ENSG00000101019.22	chr20	-	35302579	35304069	PAS	True	0.0369512	4.64412e-05	0.0960146	0.000134683	0.442073	0.0026227	0.266132	0.0290776	0.787616	0.22213	0.285547	0.0401417	0.389452	0.0234765	0.338532	0.0374381	0.00704411	8.91747e-06	0.158564	0.0186957	0.855249	0.000112757	0.429252	0.11716
SLC4A1AP	ENSG00000163798.13	chr2	+	27688020	27688699	3AS	True																	0.00704411	8.87848e-06	0.121501	0.0032349	0		0.0607551	0.0076158
GUSBP11	ENSG00000228315.12	chr22	-	23695517	23705428	ES	False	0.658515	0.00697457	0.619891	4.20166e-05	0.360921	3.72916e-05	0.497642	0.00900821	0.096116	0.000477803	0.749122	0.0174919	0.345228	0.00945491	0.496403	0.0490466	0.731217	0.301152	0.621939	0.0096644	0.47222	0.0226886	0.561758	0.0192804
TMX3	ENSG00000166479.10	chr18	-	68689054	68691294	3AS	True									0.050545	0.000154185	0.237213	0.0110989	0.744072	0.0258316	0.522703	0.0747014
HELQ	ENSG00000163312.11	chr4	-	83447028	83448782	3AS	True									0.050545	0.000156264	0.835725	0.00765445	0.971095	4.20097e-05	0.917827	0.00660777
TRMT13	ENSG00000122435.10	chr1	+	100140514	100140844	IR	True									0.0785928	0.000347896	0.638254	0.0311879	0.954616	0.000896397	0.817132	0.0358397
MS4A1	ENSG00000156738.18	chr11	+	60464344	60464695	IR	True									0.00747826	1.0903e-05	0.713312	0.00647513	0.962572	0.000983461	0.869715	0.0184993
EP400	ENSG00000183495.14	chr12	+	132077400	132079096	PAS	True									0.00763578	1.12668e-05	0.958017	0.00149685	0.858145	6.33656e-05	0.905268	0.0037852
SF3B1	ENSG00000115524.17	chr2	-	197434971	197435027	TSS	True	0.0080363	3.08388e-06	0.908626	0.000195386	0.987184	1.61781e-07	0.947624	0.0019283									0.883153	0.618145	0.774073	0.0567602	0.683397	0.0969415	0.730806	0.0761582
ABCG1	ENSG00000160179.19	chr21	+	42219140	42219304	TSS	True									0.0928954	0.000450436	0.648243	0.0894319	0.95048	0.000210265	0.850137	0.0205437	0.623681	0.149695	0.853787	0.0141408	0.964874	5.64542e-06	0.911214	0.00568685
TPX2	ENSG00000088325.16	chr20	+	31739621	31757406	ES	True	1	0.516449	0.940832	5.76073e-05	0.951333	5.32733e-06	0.945326	6.53251e-05									0.0857048	0.000389475	0.842617	0.00292319	0.95212	0.00015201	0.886536	0.00496537
CASP8	ENSG00000064012.22	chr2	+	201286458	201287707	PAS	True	1	0.127269	0.870376	6.02359e-06	0.809372	4.03574e-05	0.848108	8.81169e-05	0.00853081	1.30369e-05	0.809412	0.0374394	0.949512	0.000229129	0.915973	0.00429993	0.834575	0.502054	0.610464	0.101207	0.454528	0.124056	0.542793	0.11549
SF3B1	ENSG00000115524.17	chr2	-	197401984	197402131	TSS	True	0.00875896	3.69732e-06	0.0798472	0.000289114	0		0.0364088	0.00656422
TRIM37	ENSG00000108395.14	chr17	-	59001714	59012327	3AS	False	0.0708341	0.000181188	0.29318	3.21151e-06	0.12691	0.000776659	0.212018	0.00747694	0.346208	0.00482255	0.414393	0.00748969	0.16977	0.00620299	0.263495	0.0210037	0.772112	0.373842	0.351619	0.0680766	0.111122	0.00150312	0.279321	0.0662271
CAPZA1	ENSG00000116489.13	chr1	+	112649469	112654464	3AS	True									0.0101344	1.61997e-05	0.79555	0.00553598	0.968341	4.7996e-07	0.890742	0.00865838	0.359538	0.014408	0.217953	0.0367506	0.718727	0.0756118	0.409239	0.100881
HLA-A	ENSG00000206503.13	chr6	+	29943026	29944121	3AS	True																	0.0101757	1.53592e-05	0.975009	4.46485e-07	0.302927	6.93751e-05	0.737517	0.100599
OXA1L	ENSG00000155463.14	chr14	+	22770278	22770460	IR	False	1	0.0722527	0.773633	0.00354916	0.573648	0.0149893	0.67432	0.018083	0.699825	0.108884	0.815986	0.00588225	0.735358	0.031508	0.767366	0.0205818	0.0280454	6.00837e-05	0.628082	0.0108332	0.31965	0.0867112	0.484419	0.0724649
DENND4A	ENSG00000174485.16	chr15	-	65697383	65701050	ES	False	1	0.882841	0.204783	0.00141324	0.209572	6.81534e-05	0.208984	0.000137943	0.401836	0.00828146	0.148483	0.00985497	0.10511	3.49249e-06	0.123347	0.00300011	0.0745956	0.000293354	0.358314	0.0268921	0.031032	0.00709264	0.234897	0.0457287
PSME3IP1	ENSG00000172775.17	chr16	-	57178852	57185820	ES	True									0.0372492	0.000102727	0.154205	1.34806e-05	0.024483	0.00119212	0.0787194	0.00495969	0.625099	0.152394	0.175649	0.0185242	0.0323181	3.12156e-06	0.131813	0.0140823
SSBP1	ENSG00000106028.11	chr7	+	141750310	141750457	PAS	True	1	0.0339127	0.559618	6.17183e-05	0.79649	1.82341e-05	0.666744	0.00983254	0.0107059	1.76774e-05	0.43341	0.00131072	0.71934	5.09429e-05	0.583265	0.017327	0.717722	0.275556	0.814786	0.0253826	0.762259	0.0833045	0.774194	0.0537657
CCDC18-AS1	ENSG00000223745.8	chr1	-	93337471	93338373	5AS	True									0.0785323	0.000345381	0.0738755	0.00747081	0.534477	0.00243621	0.308899	0.0713521
NFE2L2	ENSG00000116044.16	chr2	-	177230310	177232008	PAS	True	0.876644	0.0154883	0.895313	0.00306025	0.966923	4.7146e-07	0.931156	0.00196873	0.549685	0.02816	0.892386	0.000765913	0.93367	0.000280757	0.916913	0.000875075	0.090417	0.000451249	0.902281	0.00147152	0.969744	1.34244e-05	0.931643	0.00160957
PRPF38B	ENSG00000134186.12	chr1	+	108692867	108693571	3AS	True									0.0604911	0.000210389	0.0467402	6.24017e-06	0.577322	0.000515149	0.296583	0.0775923
CXXC1	ENSG00000154832.15	chr18	-	50285247	50285748	ES	False	0.768418	0.0116801	0.727558	8.48614e-05	0.957102	3.58381e-06	0.855477	0.0128664	0.0644429	0.000243608	0.568652	3.00463e-05	0.88953	0.000464429	0.773304	0.0195306	0.533428	0.0751211	0.551272	0.0265036	0.817227	0.0276493	0.685605	0.0456466
UBXN2A	ENSG00000173960.14	chr2	+	23999671	24000821	PAS	True									0.986496	0.84565	0.868098	0.0141533	0.901987	0.00713975	0.886705	0.0104173	0.0133754	2.34676e-05	0.733529	6.57181e-05	0.939103	0.0206138	0.80946	0.0253132
MS4A1	ENSG00000156738.18	chr11	+	60464852	60465920	IR	True									0.0133878	2.39871e-05	0.548687	0.0181537	0.920665	0.00384148	0.773209	0.0393806
ATP6V1A	ENSG00000114573.10	chr3	+	113778835	113781049	3AS	True																	0.0135395	2.43919e-05	0.111565	0.0039198	0		0.0663178	0.00720582
ADD3	ENSG00000148700.15	chr10	+	110077118	110100624	ES	False									0.023397	5.21953e-05	0.363976	1.80674e-05	0.472663	0.00167413	0.428932	0.00376912
LSG1	ENSG00000041802.11	chr3	-	194648795	194650880	5AS	True									0.0343061	8.97891e-05	0.239026	0.000101795	0.00682219	2.24403e-06	0.0941979	0.019453
METTL5	ENSG00000138382.15	chr2	-	169812506	169815476	3AS	False																	0.0593708	0.000198018	0.242606	2.69759e-05	0		0.120243	0.0140182
SOAT1	ENSG00000057252.13	chr1	+	179348942	179350295	3AS	True	0.0454689	8.02628e-05	0.0923885	0.000320175	0		0.0440439	0.00528858									0.0141086	2.57606e-05	0.166115	0.0126416	0		0.0872256	0.016195
GPX1	ENSG00000233276.7	chr3	-	49357766	49358026	IR	False																	0.0656629	0.00024618	0.599481	0.0155754	1		0.719753	0.0515613
SMAP2	ENSG00000084070.12	chr1	+	40344815	40344910	TSS	False									0.0669668	0.000273188	0.0163791	1.86974e-06	0.185505	0.0149493	0.118721	0.0147402	0.327486	0.00938386	0.0466628	0.0143268	0.310931	0.00841071	0.113626	0.0288492
SYNE1	ENSG00000131018.24	chr6	-	152143765	152148044	ES	False									0.0357386	9.54219e-05	0.103822	0.0163792	0.454845	0.000451171	0.343064	0.0276129
HELQ	ENSG00000163312.11	chr4	-	83437097	83439862	3AS	True									0.0627246	0.000229175	0.169813	0.0111937	0.023649	0.000134759	0.0833411	0.00821783	0.540033	0.0802091	0.12159	0.0137725	0		0.0722469	0.0101357
TOR1AIP2	ENSG00000169905.13	chr1	-	179862443	179865869	PAS	True	0.0522494	0.000105426	0.225614	0.00303051	0		0.101183	0.0244106									0.327508	0.0094569	0.0909099	2.5494e-05	0		0.0535945	0.00302439
CR2	ENSG00000117322.18	chr1	+	207466912	207468547	IR	True									0.0559588	0.000184796	0.218928	0.067195	0.907066	9.69757e-05	0.576059	0.129177
ZNF559-ZNF177	ENSG00000270011.7	chr19	+	9341184	9343589	3AS	True									0.0669668	0.000271881	0.676256	0.000133654	0.983948	0.000789548	0.869326	0.0232329
VTI1A	ENSG00000151532.14	chr10	+	112448489	112448881	IR	True									0.800944	0.242554	0.62491	0.0113038	0.635088	2.87217e-05	0.634099	0.00220104	0.0169732	3.18175e-05	0.118802	5.75932e-05	0.333333	0.222221	0.267821	0.0888603
TUT4	ENSG00000134744.14	chr1	-	52436975	52438219	IR	True	1	0.623865	0.0593169	2.45765e-06	0.115365	4.88946e-05	0.0683897	7.20534e-06	0.0171628	3.25595e-05	0.168175	0.00982117	0.519142	6.72572e-05	0.355211	0.0353819
FCRL2	ENSG00000132704.16	chr1	-	157801577	157801914	3AS	True									0.0215948	4.51402e-05	0.837141	0.000103236	0.291187	0.0185077	0.517363	0.0724451
DOCK10	ENSG00000135905.20	chr2	-	224805514	224806125	IR	True									0.0815549	0.00037084	0.0270811	3.20124e-06	0.333567	8.99825e-05	0.150216	0.0192395
MFSD6	ENSG00000151690.15	chr2	+	190408503	190435976	ES	False	1	0.967507	0.27124	0.00195153	0.277958	2.58027e-05	0.271452	7.30813e-05	0.0192135	3.81373e-05	0		0.228659	7.73623e-05	0.128091	0.0125396
CCDC88A	ENSG00000115355.17	chr2	-	55296523	55299838	ES	True									0.0901873	0.000432488	0.272773	0.0366529	0.066489	5.60165e-06	0.15305	0.0178038
MAP3K7	ENSG00000135341.18	chr6	-	90515092	90515907	IR	True									0.0378756	0.00010512	0.349581	0.0366773	0.772267	5.03984e-05	0.571045	0.0543618
ENTPD1	ENSG00000138185.20	chr10	+	95755743	95755766	TSS	True									0.890124	0.459883	0.144573	0.00248006	0.116243	0.003094	0.128344	0.00298828	0.0597525	0.000200746	0.393921	0.0330607	0.153639	0.000153744	0.304569	0.0271966
AHSA2P	ENSG00000173209.23	chr2	+	61185618	61186445	IR	False									0.096724	0.000482524	0.350135	3.73437e-05	0.6711	0.0406388	0.53745	0.0460694
CD300LF	ENSG00000186074.19	chr17	-	74670061	74672982	PAS	True																	0.0432677	0.000119029	0		0.13612	8.84608e-06	0.0537409	0.00422764
TMX3	ENSG00000166479.10	chr18	-	68687765	68689947	3AS	True									0.060546	0.000214834	0.603535	0.0338563	0.196056	0.00424044	0.364078	0.0497557
PRPF40A	ENSG00000196504.19	chr2	-	152694622	152715994	ES	False									0.0215948	4.45782e-05	0.13365	0.00549358	0.0628368	6.21811e-05	0.0931045	0.00256754	0.377985	0.017714	0.054959	0.000307908	0.0437202	0.00410686	0.0485916	0.00155254
PKM	ENSG00000067225.18	chr15	-	72199031	72199756	PAS	True									0.0215948	4.44698e-05	0.871355	0.0215791	0.955388	7.08931e-07	0.918501	0.00746196
EZH2	ENSG00000106462.11	chr7	-	148814137	148815505	ES	False																	0.0219184	4.17337e-05	0.980228	2.15231e-07	0.86881	0.0195953	0.934049	0.00793731
GPCPD1	ENSG00000125772.14	chr20	-	5610144	5610841	3AS	True									0.0222224	4.7221e-05	0.544194	4.48502e-05	0.901816	3.49912e-06	0.789788	0.0215298	0.23211	0.00316732	0.821954	0.0183303	1		0.869573	0.0211647
SLC11A2	ENSG00000110911.16	chr12	-	50985993	50988435	PAS	True	1	0.860584	0.475182	0.0389478	0.399199	0.0401143	0.43703	0.0410596	0.919484	0.564201	0.256211	0.00228594	0.28777	0.00472865	0.273226	0.00386894	0.0223486	4.35362e-05	0.586941	0.00605621	0.288789	0.000148967	0.451495	0.0295013
DOCK2	ENSG00000134516.18	chr5	+	169674445	169681743	3AS	True																	0.0223486	4.40704e-05	0.112279	0.00650523	0		0.0669482	0.00984166
CDC27	ENSG00000004897.12	chr17	-	47157140	47157229	IR	True									0.0225154	4.86465e-05	0.783455	0.000103421	0.931917	3.3721e-06	0.878287	0.00465634	0.2873	0.00575174	0.476836	5.3962e-05	0.33538	0.107502	0.443239	0.00724987
BAZ1A	ENSG00000198604.11	chr14	-	34800339	34800390	PAS	True																	0.0359007	9.08967e-05	0.0667217	0.00122122	0.338383	0.0971165	0.214399	0.049455
G2E3	ENSG00000092140.16	chr14	+	30597526	30598099	IR	True									0.060546	0.000212951	0.420457	8.28848e-05	0.715739	7.9455e-05	0.600939	0.0145946
LINC00377	ENSG00000229246.2	chr13	+	80652591	80753844	ES	True									0.0648495	0.00024833	0.800013	0.159988	0.945974	3.44873e-06	0.87104	0.034043
ZNF860	ENSG00000197385.6	chr3	+	31988659	31992144	PAS	True									0.049136	0.000146729	0.491966	5.84702e-05	0.427178	0.0749977	0.460586	0.0499196
CLINT1	ENSG00000113282.14	chr5	-	157789513	157790599	3AS	True									0.0669668	0.000271899	0.0877329	0.00265118	0.258536	5.46052e-05	0.184662	0.00634526	0.441593	0.032725	0.189103	0.0143156	0.372899	4.03316e-05	0.25326	0.0125735
LINC01410	ENSG00000238113.7	chr9	+	62811938	62813488	PAS	True									0.0737339	0.000314731	0.454451	7.81987e-05	0.0550271	0.00258371	0.297564	0.0232535	0.384758	0.0189294	0.227863	0.0370843	0		0.140433	0.0379846
SAFB2	ENSG00000130254.12	chr19	-	5595497	5598792	3AS	True	0.0249466	2.33314e-05	0.0954744	4.19243e-06	0.00154754	1.29051e-08	0.0468608	0.00503918									0.107514	0.000632205	0.213043	0.0289337	0.00322376	4.66501e-08	0.128517	0.0304359
SERBP1	ENSG00000142864.15	chr1	-	67424977	67425082	IR	True									0.0264743	6.13853e-05	0.0496568	0.00281867	0.209864	0.00494141	0.136989	0.014646
MBOAT2	ENSG00000143797.12	chr2	-	8908716	9003539	3AS	True																	0.0268175	5.61473e-05	0.402344	0.000257618	0.0221989	0.00120451	0.195983	0.0304801
TNPO3	ENSG00000064419.13	chr7	-	128954894	128955385	PAS	True	1	0.989326	0.940188	1.23109e-05	0.938223	7.61966e-07	0.939144	2.88579e-06	0.974104	0.783797	0.86406	0.00254466	0.847148	0.0017445	0.853437	0.00221327	0.0268175	5.58076e-05	0.747881	0.0127273	0.966832	1.77076e-06	0.836379	0.0192566
AC079466.1	ENSG00000266976.3	chr19	+	28611190	28611972	IR	True	0.0692291	0.000165395	0.40359	7.91808e-06	0.735927	0.000121441	0.56961	0.0250838
DMTF1	ENSG00000135164.19	chr7	+	87181341	87182227	3AS	False	1	0.625384	0.211374	0.000558281	0.225363	4.36039e-06	0.217311	0.00010121	0.0276869	6.61423e-05	0.411843	0.0184659	0.539059	0.000583882	0.482083	0.0127252	0.812879	0.455414	0.461528	0.012635	0.362895	0.0126027	0.427631	0.0111289
NOP58	ENSG00000055044.11	chr2	+	202292903	202297378	3AS	True									0.63936	0.0664846	0.465993	0.0196404	0.27805	0.0126356	0.35826	0.0255089	0.0281218	6.16165e-05	0.354777	0.0305574	0.014899	8.7373e-07	0.238011	0.0420235
IG_locus_9	IG_locus_9	chr2	-	89222382	89222461	TSS	False									0.976494	0.794245	0.0829899	0.0598429	0.142757	0.090798	0.124805	0.0825976	0.0282256	6.25313e-05	0.174298	0.0526506	0.0780306	0.00047651	0.148602	0.0296694
MMS19	ENSG00000155229.21	chr10	-	97459475	97459658	IR	True	1	0.0244811	0.172468	6.55478e-05	0.508425	0.102416	0.315958	0.0525471	0.0289303	6.96209e-05	0.0144675	7.67944e-07	0.809389	4.40444e-05	0.396959	0.152253
ANKRD13A	ENSG00000076513.17	chr12	+	109999784	110012004	3AS	True	0.0290517	3.23304e-05	0.138831	3.01136e-06	0.01418	3.32986e-07	0.080089	0.00484463									0.511998	0.0604318	0.221344	0.0147155	0.0640935	0.00262942	0.161438	0.0160667
DYNC1I2	ENSG00000077380.16	chr2	+	171728418	171728716	3AS	True									0.0295193	7.25563e-05	0.12901	0.00384854	0.0289218	1.23985e-05	0.0719233	0.0031989
SEPTIN1	ENSG00000180096.12	chr16	-	30381244	30381338	IR	False									0.0295193	7.31126e-05	0.393371	0.0117129	0.802329	0.00273977	0.605189	0.0400789
ENO1	ENSG00000074800.16	chr1	-	8868057	8871890	5AS	True	1	0.216209	0.949546	0.0101559	0.903947	1.28947e-05	0.927478	0.0023129	0.781568	0.211126	0.839013	0.023759	0.746894	0.00813394	0.755804	0.0291824	0.0301059	6.96285e-05	0.233411	2.30528e-05	0.592616	0.176882	0.38948	0.101438
YIPF5	ENSG00000145817.17	chr5	-	144162399	144164110	IR	True	1	0.181677	0.183947	0.022747	0.0468108	0.0118966	0.117847	0.0214577	0.982823	0.825417	0.171556	0.00718999	0.19601	0.0067098	0.185296	0.00714918	0.0301059	6.92135e-05	0.0725259	7.65127e-06	0.0214561	0.00277653	0.0505635	0.000969448
INSIG1	ENSG00000186480.13	chr7	+	155298697	155302746	3AS	True									0.0306912	7.76324e-05	0.517408	4.55721e-05	0.890361	5.85388e-05	0.758348	0.0277471	0.986296	0.924229	0.235741	9.60402e-05	0.242084	0.00247046	0.244943	0.00136052
AP1G2	ENSG00000213983.12	chr14	-	23562066	23562287	IR	False	1	0.0317646	0.0779773	0.000351631	0.219953	6.8668e-05	0.12729	0.00480561	0.0311854	7.94302e-05	0.0326613	2.24814e-06	0.136102	8.52336e-06	0.0879964	0.00297867	0.908964	0.687436	0.068632	0.0129662	0.113651	0.0135251	0.0864494	0.0143429
HNRNPH1	ENSG00000169045.17	chr5	-	179614959	179616125	ES	False	1	0.0520625	0.878743	8.98127e-07	0.878011	0.00185848	0.878649	0.000694886	0.854595	0.351364	0.893569	0.000609132	0.879355	0.000294069	0.885298	0.000497289	0.0325143	7.67817e-05	0.903536	0.000112942	0.819824	0.00173407	0.872891	0.00283306
STAT4	ENSG00000138378.19	chr2	-	191058219	191058709	IR	True									0.886961	0.451537	0.360205	2.2226e-05	0.273064	6.54466e-05	0.33314	1.96188e-05	0.0460166	0.000132193	0.277547	1.73732e-05	0.0539851	0.00984627	0.182044	0.0192627
DCTN4	ENSG00000132912.13	chr5	-	150753657	150756416	ES	False									0.0325863	8.35708e-05	0.0887186	0.000642655	0.184364	0.000483079	0.145667	0.00297219	0.920113	0.715263	0.11542	0.00540162	0.100105	0.00743188	0.110751	0.00622343
RAB1A	ENSG00000138069.18	chr2	-	65087153	65088690	PAS	True									0.922166	0.579237	0.760392	0.00730939	0.711187	0.0109312	0.732066	0.00998656	0.0326269	7.96712e-05	0.886802	0.00136341	0.96585	0.000486784	0.922689	0.00281378
NECAP1	ENSG00000089818.18	chr12	+	8091850	8092675	IR	False	1	0.864456	0.355697	0.0279949	0.309299	0.0155483	0.335724	0.0233305	1	0.985888	0.43391	0.0401828	0.44564	0.0366535	0.439559	0.0387762	0.0326269	8.10191e-05	0.25878	0.000996257	0.0457918	0.000343834	0.171319	0.0137386
CELF2	ENSG00000048740.18	chr10	+	11165682	11249152	ES	False																	0.0326269	7.84932e-05	0.924168	4.86441e-06	0.984933	6.67407e-07	0.949233	0.00105996
COBLL1	ENSG00000082438.17	chr2	-	164703220	164704443	3AS	True									0.0735157	0.000311217	0.721225	0.0120356	0.0419087	7.12823e-05	0.298337	0.113835
ERCC3	ENSG00000163161.14	chr2	-	127289519	127289688	IR	False	1	0.0365889	0.63437	0.0143022	0.823957	4.77559e-05	0.722787	0.0141529	0.0333032	8.65793e-05	0.736176	0.00791344	0.898463	0.000616661	0.823312	0.00860841	0.62123	0.147673	0.292201	0.0174034	0.443988	0.0193161	0.348605	0.0227834
TMX3	ENSG00000166479.10	chr18	-	68689042	68689947	3AS	True									0.0346665	9.13413e-05	0.982601	0.00137448	0.878928	8.35289e-06	0.933469	0.00461857
POC1B	ENSG00000139323.14	chr12	-	89492115	89525119	ES	False	1	0.405907	0.637905	0.00375881	0.708942	0.000102835	0.670643	0.00281257	0.575865	0.0344342	0.51685	3.64917e-05	0.493883	0.00906486	0.503614	0.00540804	0.0396667	0.000103329	0.591155	0.0024551	0.367934	0.0503465	0.493729	0.0294354
LINC01138	ENSG00000274020.4	chr1	-	148432959	148435354	PAS	True									0.0644429	0.000244509	0		0.249953	7.90025e-05	0.124411	0.0141897
FCRL1	ENSG00000163534.15	chr1	-	157792312	157796170	PAS	True									0.0769582	0.000332549	0.783869	0.00428149	0.904656	0.000859594	0.852332	0.00527308	0.634234	0.162853	0.857246	2.52359e-05	0.970915	2.81175e-06	0.912256	0.00299581
LAX1	ENSG00000122188.13	chr1	+	203765383	203765516	IR	True									0.0618891	0.000223948	0.671705	0.00573128	0.870231	0.000440923	0.788046	0.0110885
TRMT13	ENSG00000122435.10	chr1	+	100140514	100140966	3AS	True	1	0.492479	0.944215	0.0019413	0.914374	0.000968838	0.930566	0.00208703	0.0359025	9.649e-05	0.825386	0.000684443	0.611433	0.00820958	0.708277	0.0170152	0.357981	0.0137052	0.776903	0.059581	0.873052	4.00089e-05	0.833168	0.0218108
ABCC5	ENSG00000114770.17	chr3	-	183983753	183985378	PAS	True	1	0.0686414	0.0975051	0.0014222	0.022803	0.000223527	0.0589555	0.00255667	0.0361049	9.76682e-05	0.331941	0.0154631	0.0451304	2.63587e-06	0.165025	0.0223903	0.752291	0.339523	0.167696	0.0283558	0.089516	0.00272863	0.143949	0.0197737
DCAF16	ENSG00000163257.11	chr4	-	17804771	17810446	ES	True	0.0379023	4.94524e-05	0.524811	1.89471e-05	0.834598	3.74477e-05	0.66604	0.0195883
TRMT13	ENSG00000122435.10	chr1	+	100140514	100140851	IR	False									0.0395134	0.000111954	0.1631	0.00119932	0.403705	0.013066	0.306015	0.0200228
CRBN	ENSG00000113851.14	chr3	-	3154075	3154746	IR	False	1	0.600071	0.207777	0.00839874	0.307639	0.0223538	0.257678	0.0165378	0.0395134	0.000112441	0.332051	0.00399976	0.577321	0.0123311	0.473409	0.0232967	0.760454	0.351309	0.0723887	0.00240305	0.0404436	0.00106036	0.0589884	0.00213296
LINC00494	ENSG00000235621.9	chr20	+	48360150	48363931	3AS	True									0.0627607	0.000231003	0.838794	0.00785419	0.962242	8.41552e-07	0.918608	0.00419983
ITGAM	ENSG00000169896.18	chr16	+	31331635	31332868	PAS	True									0.79741	0.236712	0.217807	7.89543e-05	0.372595	0.0213255	0.323789	0.0137274	0.0413356	0.000110695	0.50657	0.0306404	0.760196	8.34837e-06	0.603383	0.0283429
PB_novel_18980	PB_novel_18980	chr5	+	112529836	112532589	PAS	True									0.0497351	0.000149391	0.64235	0.072007	0.891362	3.37946e-05	0.756062	0.036802
BX571818.1	ENSG00000285417.1	chr1	+	206053265	206056178	IR	True									0.0608566	0.000217078	0.81787	9.69132e-06	0.921041	0.00564929	0.872722	0.00761783
KANSL2	ENSG00000139620.13	chr12	-	48655060	48660467	ES	True									0.848353	0.33708	0.222444	0.0123016	0.174371	0.00115741	0.196939	0.00580748	0.0426739	0.000116357	0.312532	5.46365e-05	0.0617978	6.24833e-06	0.212744	0.0110233
ZNF654	ENSG00000175105.8	chr3	+	88113196	88128991	3AS	True																	0.0426739	0.000116081	0.91428	1.41533e-05	0.833356	0.138863	0.84717	0.0516328
RSRP1	ENSG00000117616.18	chr1	-	25243633	25245149	IR	False																	0.0437231	0.000121347	0.910289	0.00301678	0.621352	0.127746	0.742486	0.0804549
TMCC2	ENSG00000133069.17	chr1	+	205271812	205273338	PAS	True																	0.0524101	0.000167053	0.578433	0.0130456	0.885461	0.000920521	0.691145	0.0271889
HNRNPH3	ENSG00000096746.17	chr10	+	68337333	68338502	ES	False	1	0.319848	0.879829	2.74643e-05	0.907337	0.00125215	0.890892	0.000659591	0.584683	0.0380285	0.784603	0.002964	0.676387	0.0158369	0.721948	0.0121753	0.045024	0.000126053	0.704802	0.0631042	0.8403	2.50471e-05	0.753282	0.0335635
ACIN1	ENSG00000100813.14	chr14	-	23081836	23090521	ES	False	1	0.459512	0.349298	0.00477457	0.297709	0.0011899	0.325819	0.00372802	0.934192	0.623632	0.55663	0.00552298	0.518286	0.0213574	0.534851	0.0155114	0.04721	0.000136771	0.762894	8.29949e-05	0.31682	0.0369781	0.583253	0.0528036
ANAPC4	ENSG00000053900.11	chr4	+	25414385	25414465	IR	False	0.996029	0.0227804	0.196375	8.3713e-05	0.107658	5.35505e-06	0.158986	0.00134389	0.969806	0.762544	0.328283	0.00375351	0.318226	0.00641538	0.322119	0.00532658	0.0473382	0.000138295	0.217486	2.3506e-05	0.0915898	0.0177032	0.166599	0.00921203
CCNDBP1	ENSG00000166946.14	chr15	+	43185879	43189198	ES	False									0.0479744	0.000140732	0.896556	1.99972e-05	0.785929	0.00128534	0.834924	0.00326629	0.679696	0.218662	0.914545	0.00281518	0.929142	2.43998e-05	0.921328	0.00155733
RPRD1A	ENSG00000141425.18	chr18	-	36025678	36026899	IR	False	0.0843496	0.000223215	0.638154	0.0146741	0.984807	3.05014e-07	0.822284	0.0360611									0.404373	0.0234611	0.489649	0.0723499	0.724649	0.134621	0.585261	0.0986374
STAU1	ENSG00000124214.20	chr20	-	49124587	49135832	3AS	False	0.309856	0.00184303	0.208919	2.48481e-06	0.13523	0.000331443	0.174197	0.00140623	0.0737339	0.000313947	0.196354	7.9373e-06	0.135998	2.13575e-06	0.158755	0.000514576	0.53681	0.0780489	0.28844	0.00403461	0.202758	0.00338932	0.254773	0.00482681
FAM171A1	ENSG00000148468.17	chr10	-	15370955	15371084	TSS	True	0.0488508	9.18565e-05	0.159765	1.04748e-05	0.553907	1.04427e-05	0.346149	0.0294817
DNAJA4	ENSG00000140403.12	chr15	+	78274424	78275600	3AS	True									0.924718	0.589682	0.847044	1.99361e-05	0.901447	4.83412e-05	0.871687	6.41797e-05	0.0789064	0.000332714	0.88964	4.71732e-06	0.954678	5.04135e-07	0.917812	0.00160718
PPP1R12A	ENSG00000058272.19	chr12	-	79806352	79807225	IR	True									0.0735059	0.000309885	0.426021	0.0717873	0.94244	9.84532e-06	0.69804	0.0854256
SLC9B2	ENSG00000164038.16	chr4	-	103047168	103048892	3AS	True									0.050545	0.000155834	0.991429	1.02557e-06	0.914846	9.31825e-06	0.943051	0.00125666
ARHGAP17	ENSG00000288353.1	ML143373.1	-	202456	202967	PAS	True																	0.0507789	0.000154527	0.222503	3.23113e-05	0		0.146984	0.0356015
PTGS1	ENSG00000095303.17	chr9	+	122371272	122377898	ES	False																	0.0510707	0.000156659	0.0498393	0.00602049	0.293829	2.9881e-05	0.173498	0.0202293
TBC1D15	ENSG00000121749.15	chr12	+	71922982	71924310	PAS	True	1	0.0425449	0.86635	3.72246e-06	0.938635	5.44346e-06	0.890853	1.74395e-05	0.692026	0.102851	0.724296	0.00319407	0.753784	0.0149936	0.742624	0.0111216	0.0514022	0.000158927	0.724895	0.015761	0.927042	0.00285241	0.809241	0.0216104
PPP2R5A	ENSG00000066027.12	chr1	+	212347406	212348388	ES	True									0.92942	0.606052	0.339381	0.00848405	0.275836	0.00752146	0.298944	0.00882462	0.0514402	0.000160297	0.536174	0.0010846	0.168243	0.0188086	0.365782	0.0429171
CACUL1	ENSG00000151893.15	chr10	-	118692363	118693749	PAS	True									0.0517982	0.000161048	0.35975	0.000116041	0.109224	0.00214652	0.235105	0.0244	0.906044	0.678209	0.249172	0.0190205	0.221486	0.0407571	0.235103	0.0249178
TBC1D15	ENSG00000121749.15	chr12	+	71873003	71893221	ME	False									0.949912	0.686142	0.720823	0.0487811	0.732749	0.0177348	0.72442	0.0270859	0.0520967	0.000163611	0.411326	0.0139303	0.756788	0.000529247	0.556655	0.0321974
TPP2	ENSG00000134900.12	chr13	+	102645009	102646293	IR	False	0.0522494	0.000106267	0.201886	2.25135e-05	0.0609571	3.30343e-05	0.122652	0.00473186	0.944227	0.663674	0.172257	0.024005	0.144209	0.00916144	0.15158	0.0129462
UQCC1	ENSG00000101019.22	chr20	-	35344113	35347272	PAS	True	0.181336	0.000841998	0.693581	3.85219e-05	0.449944	0.0196929	0.576582	0.0219833	0.919166	0.559963	0.659131	0.0352586	0.567762	0.032063	0.609796	0.0369334	0.0524101	0.000167147	0.460726	0.00224317	0.102949	0.0171515	0.327408	0.0444868
SYK	ENSG00000165025.15	chr9	+	90895527	90898548	PAS	False	1	0.223166	0.929727	1.06076e-06	0.940937	0.000663645	0.937485	0.000428071	0.0525641	0.000164352	0.605525	0.00019684	0.730384	0.00832606	0.679994	0.0100206	0.663559	0.199418	0.565247	0.0634983	0.754218	0.0242205	0.638024	0.0546222
ZNF41	ENSG00000147124.12	chrX	-	47456398	47467409	5AS	True	1	0.854806	0.0534197	5.64553e-06	0.0772247	3.80585e-05	0.0643465	5.93012e-06	0.052831	0.000167043	0		0.104761	1.75348e-05	0.0713686	0.00273812
ZNF41	ENSG00000147124.12	chrX	-	47456398	47467323	3AS	True									0.0540689	0.000173806	1		0.651306	4.31122e-05	0.750067	0.0235234
NME8	ENSG00000086288.12	chr7	+	37850735	37857277	3AS	True																	0.0868318	0.000406393	0.912518	4.25888e-06	0.714287	0.204079	0.851628	0.0259461
CHD9	ENSG00000177200.17	chr16	+	53238586	53242839	ES	True																	0.0552917	0.000179029	0.155431	1.34029e-05	0		0.106029	0.00479765
LAS1L	ENSG00000001497.18	chrX	-	65524262	65524964	ES	False	1	0.149084	0.183185	0.00863229	0.261942	5.0016e-05	0.229705	0.00793761	0.605912	0.0464793	0.318889	0.0162849	0.422589	0.00232521	0.376284	0.0114395	0.0552917	0.000178011	0.176689	1.49465e-05	0.263373	0.10969	0.207025	0.022655
COIL	ENSG00000121058.5	chr17	-	56949767	56949888	IR	True	1	0.854158	0.0982198	0.00115218	0.0808318	0.000631324	0.0903924	0.000955287	0.870101	0.399534	0.209246	0.00138317	0.243673	0.00350391	0.229065	0.00304892	0.0554865	0.000181011	0.136745	0.000477997	0.0462645	8.9694e-07	0.0989763	0.0020538
ZNF107	ENSG00000196247.11	chr7	+	64679336	64691247	ES	False	1	0.450073	0.373306	6.93787e-05	0.28785	3.23327e-05	0.345217	3.72123e-05	0.0558662	0.000180565	0.305399	0.00840768	0.0890759	0.00136212	0.184349	0.0156841
NOL11	ENSG00000130935.10	chr17	+	67738355	67738951	3AS	True									0.0559588	0.00018327	0.805975	0.00487811	0.748714	6.58328e-06	0.775791	0.0032911	0.605865	0.132222	0.907242	0.0048433	0.84984	0.0295336	0.8904	0.010833
PBX3	ENSG00000167081.18	chr9	+	125748120	125748623	TSS	True	1	0.398507	0.086983	4.50375e-06	0.0624382	0.0059148	0.0774405	1.36709e-05	0.0559588	0.000184107	0.432	0.00859726	0.200596	0.00425143	0.302016	0.0187577	0.877619	0.603677	0.08513	0.00778626	0.0922047	1.27529e-05	0.0860612	0.000124531
PPP1R12A	ENSG00000058272.19	chr12	-	79806297	79807225	3AS	False	1	0.603868	0.895298	2.69491e-05	0.919796	8.44096e-06	0.904902	1.708e-05	0.0567722	0.00018848	0.794517	5.75482e-05	0.884384	0.000229393	0.848873	0.00189667	0.937039	0.766517	0.891689	0.00040361	0.872129	3.92348e-05	0.884631	0.000403063
RASA2	ENSG00000155903.13	chr3	+	141577106	141579436	IR	True									0.0573396	0.000192671	0.883024	1.55164e-05	0.618451	0.000108759	0.727594	0.0214989
GSAP	ENSG00000186088.16	chr7	-	77314489	77317555	3AS	True									0.0584507	0.000198159	0.680172	0.0294166	0.092553	0.0222101	0.348666	0.116245
MYNN	ENSG00000085274.16	chr3	+	169786415	169788495	PAS	True	1	0.596521	0.935408	1.74178e-06	0.924841	0.00271295	0.932415	7.46696e-06	0.939104	0.63784	0.805651	0.00186018	0.824816	0.00104705	0.816862	0.0015023	0.0584523	0.000192109	0.878782	1.48819e-05	0.959378	2.67234e-05	0.906829	0.00189524
PTPN22	ENSG00000134242.16	chr1	-	113848626	113856381	5AS	True									0.0785323	0.000344523	0.907305	8.03352e-06	0.844684	0.067074	0.865858	0.0284301
GATD3A	ENSG00000160221.18	chr21	+	44133616	44133838	TSS	True	1	0.238531	0.920468	2.31751e-05	0.817974	4.15997e-05	0.88621	3.56577e-05	0.0724794	0.000303415	0.953444	0.00086264	0.263624	0.102552	0.649821	0.129978
SEC31A	ENSG00000138674.17	chr4	-	82829058	82842184	ES	True									0.723325	0.136362	0.0588049	0.00125655	0.109485	0.00192108	0.0872508	0.00238069	0.0586579	0.000194212	0.326052	6.23897e-05	0.0868353	0.00575303	0.214711	0.020798
SUGP1	ENSG00000105705.16	chr19	-	19303847	19305848	3AS	False									0.059943	0.000204271	0.00591257	1.56026e-07	0.193954	0.00149565	0.0968688	0.0137023
TUT4	ENSG00000134744.14	chr1	-	52436978	52438219	IR	True	1	0.867274	0.0479482	1.09708e-05	0.0697523	3.72796e-05	0.0523378	1.37843e-06	0.0604911	0.000208229	0.0878699	0.00850264	0.2462	0.000117528	0.176382	0.0135342
WNT16	ENSG00000002745.13	chr7	+	121328999	121329387	TSS	False									0.0604911	0.000210193	0.861627	7.16852e-06	0.628656	0.0459102	0.724326	0.0274356
FOXP1	ENSG00000114861.23	chr3	-	71130497	71130584	TSS	True	1	0.51759	0.227059	0.00262068	0.25738	1.72163e-05	0.234546	0.00173625	0.060546	0.000212078	0.47704	0.00380425	0.295435	0.00422215	0.372927	0.0119263	0.982222	0.907906	0.1211	2.49894e-05	0.107651	2.51243e-05	0.115236	1.36199e-05
ARHGAP9	ENSG00000123329.20	chr12	-	57474973	57475290	IR	True									0.060546	0.000214007	0.0197483	0.000891276	0.127418	0.000934021	0.0757493	0.00433902	0.91726	0.706921	0.0767574	0.00495095	0.0568513	0.00170029	0.0687119	0.00330749
LUC7L3	ENSG00000108848.16	chr17	+	50750852	50752199	ES	False									0.948183	0.679782	0.730021	0.0161345	0.694902	0.00510333	0.70713	0.0125097	0.0605839	0.000205064	0.746134	0.000696145	0.395476	0.00874173	0.596161	0.0324437
NAPB	ENSG00000125814.17	chr20	-	23390264	23402992	ES	True									0.906995	0.515561	0.93762	1.51251e-05	0.933816	0.000793615	0.935044	0.000373176	0.0605839	0.000207803	0.752988	5.09294e-05	0.966585	0.00136831	0.842421	0.0160003
SELP	ENSG00000174175.17	chr1	-	169588851	169589461	PAS	True									0.787006	0.220867	0.133837	0.00013265	0.096374	0.00166612	0.111443	0.00124246	0.0605839	0.000207964	0.0994404	3.11225e-05	0.338387	9.1515e-05	0.163254	0.0118907
BBS2	ENSG00000125124.13	chr16	-	56501497	56502316	ES	True									0.963923	0.738708	0.266754	0.00841407	0.277225	0.0154138	0.272584	0.0121344	0.0608505	0.000210361	0.421708	0.0406571	0.0149281	1.91355e-06	0.264671	0.0771114
OSBPL9	ENSG00000117859.19	chr1	+	51787714	51788460	PAS	True																	0.0612755	0.000213322	0.834107	0.00357638	0.90046	0.0299843	0.865249	0.0153436
MIA3	ENSG00000154305.18	chr1	+	222654793	222658721	ES	True									0.0613867	0.000221052	0.14776	2.62142e-06	0.241754	0.00435705	0.200186	0.0037251	0.496016	0.0518525	0.310305	0.0267436	0.21103	0.0667233	0.267412	0.0495241
IARS1	ENSG00000196305.18	chr9	-	92251885	92256679	ME	True									0.722799	0.135607	0.962275	0.00111438	0.902093	0.00677627	0.928139	0.00462268	0.0626761	0.000221606	0.819223	0.072217	0.974803	1.10191e-06	0.865099	0.041694
AC079466.1	ENSG00000266976.3	chr19	+	28611190	28611972	3AS	True	0.068944	0.000158741	0.0779862	1.02294e-06	0.383461	1.046e-05	0.226984	0.0225816
ELAC2	ENSG00000006744.19	chr17	-	13017566	13017663	TSS	True									0.0627607	0.000231512	0.272244	0.0314031	0.0707927	2.07704e-06	0.142713	0.0102096
VTI1A	ENSG00000151532.14	chr10	+	112447467	112448381	IR	True									0.820281	0.282229	0.837902	0.010697	0.871123	1.37737e-05	0.855147	0.00378505	0.0631082	0.000230377	0.187707	0.00108443	0.333333	0.222221	0.298435	0.0867635
TFRC	ENSG00000072274.13	chr3	-	196058632	196060179	ES	True																	0.0631082	0.000230456	0.100085	0.00350338	0.0210492	0.0017585	0.0682026	0.00659504
RECQL	ENSG00000004700.16	chr12	-	21474979	21475467	3AS	True																	0.0631082	0.00023004	0.0840212	0.000749937	0.00915953	1.7226e-07	0.053588	0.00235107
AKAP13	ENSG00000170776.22	chr15	+	85743491	85743777	PAS	True									0.0632056	0.000235739	0.111539	5.57616e-06	0.0148524	1.24269e-06	0.0543339	0.00244375
LIN52	ENSG00000205659.11	chr14	+	74200012	74200200	IR	True									0.0648495	0.00024741	0.789251	4.15986e-05	0.969037	0.0130144	0.898327	0.0137847
SAMHD1	ENSG00000101347.10	chr20	-	36917049	36919363	3AS	False									0.751936	0.16765	0.152902	0.000658282	0.0819798	0.00525155	0.110578	0.00663903	0.065454	0.000243803	0.153692	0.00335619	0.0202695	0.000306714	0.0979887	0.00844302
IG_locus_5	IG_locus_5	chr14	-	106005486	106005580	TSS	False																	0.0657523	0.000248116	0.109334	0.0292795	0.0238446	0.000147544	0.0798379	0.0139611
HTT	ENSG00000197386.12	chr4	+	3124249	3125018	PAS	True									0.0669489	0.000261073	0.3919	0.0207835	0		0.173842	0.0610725
RBM25	ENSG00000119707.14	chr14	+	73099666	73102552	PAS	True									0.0669668	0.000273872	0.064934	7.70905e-07	0.1058	0.00934369	0.0891728	0.00486506
SYK	ENSG00000165025.15	chr9	+	90827420	90827579	TSS	False									0.0669668	0.00026523	0.532617	0.0152151	0.333917	0.00237405	0.427607	0.0158524
ZNF880	ENSG00000221923.9	chr19	+	52379420	52381388	PAS	True									0.0669668	0.000269204	0.119948	0.01039	0.0368749	7.38935e-07	0.06435	0.00212292	0.746365	0.327295	0.107394	0.00333463	0.217652	0.0479732	0.154505	0.0211678
SON	ENSG00000159140.21	chr21	+	33559775	33559876	IR	True									0.0669668	0.000269042	0.656811	6.78216e-05	0.266959	0.00256066	0.421938	0.0308994	0.898242	0.65844	0.357766	0.0860061	0.320865	0.129165	0.33969	0.101025
SLA	ENSG00000155926.14	chr8	-	133074852	133075026	TSS	True									0.650721	0.0748416	0.360301	0.0185432	0.214593	0.0215836	0.273846	0.0266876	0.0670395	0.000254605	0.860742	0.0113276	0.932644	2.81521e-06	0.887612	0.0061833
MFSD2B	ENSG00000205639.12	chr2	+	24016968	24017457	ES	False																	0.0789064	0.000334251	0.889655	9.46066e-06	0.496774	0.125156	0.713616	0.0612808
SLC38A1	ENSG00000111371.16	chr12	-	46243314	46268525	ES	False	1	0.148509	0.158359	0.00152051	0.210912	1.61952e-05	0.185593	0.00223277	0.734584	0.148704	0.115661	0.00307899	0.10131	0.000429892	0.107933	0.00138152	0.0681839	0.000260612	0.127361	8.89564e-06	0.0147078	0.00013198	0.0859699	0.00445437
MIR4432HG	ENSG00000228590.2	chr2	-	60412033	60412163	TSS	True									0.0684857	0.000281502	0.108101	1.53819e-05	0.225222	0.115341	0.239685	0.0842551
ZBED5	ENSG00000236287.8	chr11	-	10855118	10856143	IR	True	0.0685968	0.000147412	0.436215	0.00568054	0.752325	1.38296e-05	0.584926	0.0246502	0.11285	0.000608565	0.224726	0.0147543	0.626823	0.0452972	0.462832	0.0683394	0.690018	0.232088	0.247512	0.0857281	0.163097	0.0152175	0.217802	0.0577388
ERCC3	ENSG00000163161.14	chr2	-	127289501	127289688	3AS	False	0.0692291	0.000170024	0.136759	4.01739e-06	0.0430082	6.42574e-06	0.0912345	0.00202711	0.106834	0.000554089	0.104401	0.00129892	0.0490361	0.000113437	0.0733041	0.00116914	0.418682	0.0271602	0.377995	0.013077	0.291089	0.0452755	0.339019	0.0306621
PHGDH	ENSG00000092621.13	chr1	+	119734766	119735294	3AS	True	0.0692291	0.000162717	0.291245	6.81988e-05	0.0128275	1.43849e-06	0.14194	0.0282129
NFE2L2	ENSG00000116044.16	chr2	-	177232030	177232391	IR	True									0.0695587	0.000287135	0.599243	0.0197657	0.874915	1.2103e-05	0.751411	0.0170613
ZDHHC13	ENSG00000177054.14	chr11	+	19155929	19164300	ES	True									0.88074	0.433926	0.843141	0.0155843	0.792009	0.00619452	0.814035	0.0110372	0.0707387	0.000272098	0.758683	4.99555e-05	0.987033	5.80077e-07	0.862422	0.014296
SRP19	ENSG00000153037.15	chr5	+	112867371	112867906	PAS	True	1	0.874082	0.121646	0.000418825	0.141553	5.64686e-05	0.12809	1.61068e-05	0.0718808	0.000297983	0.290459	0.0183984	0.190514	3.9923e-06	0.242608	0.00712417	0.610956	0.136616	0.483988	0.00557386	0.476738	0.0390916	0.478151	0.019321
CAT	ENSG00000121691.7	chr11	+	34449227	34453109	5AS	True																	0.0720158	0.000280517	0.862546	1.5484e-05	0.504695	0.0253916	0.721554	0.038047
BCLAF1	ENSG00000029363.17	chr6	-	136275989	136277864	3AS	False	1	0.719947	0.93442	0.000299418	0.946122	0.00019426	0.939503	0.00027479	0.0721035	0.000300173	0.911353	0.000196072	0.951806	0.000175777	0.934359	0.000609977	0.845385	0.529527	0.869286	0.00269901	0.88746	0.00479873	0.874809	0.00347042
CCDC191	ENSG00000163617.11	chr3	-	114010771	114011226	TSS	True									0.0724794	0.000304284	0.963338	0.000174846	0.867538	0.00677696	0.907802	0.00472509
MMUT	ENSG00000146085.8	chr6	-	49430767	49431856	PAS	True																	0.0745956	0.000297107	0.910292	0.00300973	1		0.944248	0.00668238
CD72	ENSG00000137101.13	chr9	-	35616278	35616599	IR	False									0.0775872	0.00033663	0.555455	0.0373055	0.804364	3.11816e-05	0.708654	0.0200873
IARS1	ENSG00000196305.18	chr9	-	92289426	92293610	5AS	False	1	0.074718	0.382332	0.00215342	0.344236	0.000171947	0.363291	0.00152786	0.932168	0.615507	0.189456	0.000176421	0.18733	0.00147263	0.190425	0.000926839	0.0776139	0.00031555	0.374284	0.0267504	0.211621	2.49675e-05	0.30381	0.0206236
SASS6	ENSG00000156876.10	chr1	-	100121549	100123209	ES	True																	0.0776139	0.000313817	0.866403	1.85454e-05	1		0.937195	0.00439329
ZNF18	ENSG00000154957.14	chr17	-	11983404	11984112	IR	True									0.883417	0.443159	0.802864	0.00656584	0.859202	0.00224353	0.834201	0.00467846	0.0779354	0.000324446	0.552116	0.00259621	0.807044	0.109466	0.625001	0.066375
RTF1	ENSG00000137815.14	chr15	+	41470392	41471171	3AS	True																	0.0779354	0.000322146	0.183746	0.0195046	0		0.105784	0.0219762
ENOX2	ENSG00000165675.16	chrX	-	130898759	130901731	PAS	True																	0.0779354	0.000323796	0.256403	0.0569049	0.0408019	8.61882e-07	0.173733	0.033133
PACRGL	ENSG00000163138.19	chr4	+	20700457	20700787	TSS	True	1	0.766635	0.393033	0.0156524	0.482925	0.0139702	0.429609	0.0182112	0.0785323	0.000346249	0.259664	1.29763e-05	0.0904182	1.69959e-05	0.175842	0.00386917	0.781891	0.397133	0.323391	0.0255533	0.13245	0.00532999	0.259889	0.0394561
AK9	ENSG00000155085.15	chr6	-	109610094	109610513	PAS	True									0.0785323	0.000342933	0.0058564	3.52373e-07	0.0942935	3.34628e-06	0.0555336	0.00146237
HSPA14	ENSG00000187522.16	chr10	+	14851323	14852369	IR	True	1	0.233533	0.126458	0.0083734	0.0348834	6.53357e-06	0.0835193	0.00534754	0.907089	0.51606	0.225106	0.00865637	0.179558	0.0176732	0.19616	0.0161983	0.0789064	0.000331634	0.0825718	3.39416e-06	0.0999386	0.0899334	0.0516178	0.00200077
GNPTAB	ENSG00000111670.16	chr12	-	101745500	101747241	PAS	False	1	0.446172	0.849088	0.00684016	0.915765	8.26546e-05	0.87745	0.00492183	0.0790424	0.000352663	0.670273	0.0118859	0.871852	0.00127169	0.781328	0.0160319	0.731095	0.300696	0.663069	0.00240584	0.736479	0.0311411	0.687893	0.0152079
ATP2C1	ENSG00000017260.20	chr3	+	130894337	130930415	ES	False	1	0.823623	0.617716	0.00572373	0.645486	0.00335081	0.630981	0.0048244	0.0796264	0.000357252	0.484998	0.00511456	0.631767	1.14398e-05	0.564696	0.00665766	0.511748	0.0601592	0.559147	0.00531076	0.693833	0.0298448	0.619251	0.0188884
SRSF1	ENSG00000136450.13	chr17	-	58005617	58005800	IR	True	0.305305	0.00180425	0.727162	0.0229022	0.986686	9.88334e-07	0.856748	0.0274863									0.0808648	0.000346485	0.824159	0.0208289	1		0.894799	0.0192438
SDHA	ENSG00000073578.17	chr5	+	256333	256660	PAS	True	1	0.182448	0.917135	1.16984e-05	0.955912	1.9815e-06	0.932775	5.66878e-06	0.0815549	0.000371036	0.970512	0.000398938	0.917407	0.000209434	0.938864	0.00146148	0.915855	0.70334	0.934895	0.00200357	0.951364	0.00203562	0.941274	0.00213933
STRADB	ENSG00000082146.13	chr2	+	201477790	201479488	ME	True																	0.0825071	0.000357539	0.689735	0.0100778	1		0.794707	0.0238272
CD53	ENSG00000143119.14	chr1	+	110895055	110899123	5AS	True									0.952603	0.695485	0.86212	0.00960408	0.810002	0.0200199	0.830818	0.0159313	0.0825071	0.000356773	0.411269	9.88641e-05	0.292695	0.139504	0.358264	0.0429496
IG_locus_0	IG_locus_0	KI270846.1	-	480079	480162	TSS	False																	0.0825178	0.000359594	0.079802	0.00216873	0.0985745	1.61409e-06	0.08665	0.00139424
COG5	ENSG00000284369.3	KV880765.1	-	47077	49152	PAS	True	1	0.655186	0.811303	1.37442e-05	0.783879	1.53116e-05	0.79726	6.47267e-06	0.0828376	0.000382692	0.503912	0.136275	0.885971	0.00141918	0.730407	0.0490616	0.676298	0.214428	0.676984	0.0335299	0.556753	0.125745	0.631893	0.0652463
ELAC2	ENSG00000006744.19	chr17	-	13017702	13018018	TSS	True	1	0.922612	0.923933	0.0014689	0.926064	0.000812409	0.925331	0.00113802	0.0828376	0.000380999	0.645322	0.0590793	0.896724	7.70797e-06	0.783038	0.0220547	0.778526	0.388941	0.895708	0.00353897	0.932694	3.77445e-06	0.914492	0.00198367
SPART	ENSG00000133104.14	chr13	-	36335832	36346239	ES	True																	0.0857355	0.000394332	0.227825	0.000207498	0.267774	0.166248	0.245984	0.0450452
TLR2	ENSG00000137462.9	chr4	+	153684360	153702375	ES	True																	0.0841133	0.000368595	0.886864	0.00619572	0.271058	2.83769e-05	0.681595	0.0768675
COPB2	ENSG00000184432.11	chr3	-	139385200	139389547	3AS	False									0.0845925	0.000392286	0.0785404	9.22741e-06	0.276594	0.03616	0.195084	0.0229733	0.957683	0.829296	0.151841	0.0165021	0.198681	0.0231582	0.16888	0.0193176
SUPT20H	ENSG00000102710.20	chr13	-	37047936	37051487	ES	False	1	0.801356	0.734289	0.00273415	0.75113	0.000523151	0.740765	0.00202307	0.0850541	0.00039592	0.632763	0.000133453	0.731503	0.0109463	0.691646	0.00944887	0.792271	0.419336	0.811404	0.00260979	0.762882	0.00857338	0.791988	0.00458813
DLEU2	ENSG00000231607.12	chr13	-	50043435	50044768	PAS	True									1	0.957455	0.200757	0.00825461	0.181967	0.00504841	0.191498	0.00724002	0.0857048	0.00038392	0.488671	0.0921367	0.933295	7.65097e-06	0.647432	0.0875037
RNF38	ENSG00000137075.18	chr9	-	36351199	36352741	3AS	True	0.399414	0.00272826	0.159929	8.64619e-05	0		0.124184	0.0222559									0.0857048	0.000380094	0.176739	0.00466229	0		0.128813	0.0132665
KPNA2	ENSG00000182481.10	chr17	+	68044071	68044320	IR	False	1	0.706137	0.0747224	0.00120633	0.0558216	0.00126744	0.065463	0.00136676	0.639472	0.0671773	0.131713	0.00891534	0.198775	0.000907775	0.169089	0.00596311	0.0857048	0.000384178	0.118886	0.00503026	0.0248284	9.36947e-07	0.0770239	0.00495202
USP15	ENSG00000135655.16	chr12	+	62390979	62391815	3AS	True																	0.0857048	0.000390174	0.646534	0.000550572	0.599999	0.239999	0.605364	0.0551714
STRADA	ENSG00000266173.7	chr17	-	63725687	63728413	PAS	True	1	0.800013	0.101102	0.00342945	0.0652385	0.00151038	0.086522	0.00279765	0.908301	0.519184	0.129849	0.00570927	0.168339	0.0214591	0.143267	0.0107613	0.0857355	0.000396576	0.256681	0.0139676	0.0202017	1.39969e-06	0.155352	0.0191039
SELP	ENSG00000174175.17	chr1	-	169589461	169590146	3AS	False									0.846636	0.334035	0.838602	0.00123059	0.881239	0.00288767	0.863863	0.00249142	0.0857355	0.000395503	0.900293	0.000235623	0.650785	7.54659e-05	0.831966	0.0142599
CDCA2	ENSG00000184661.14	chr8	+	25459231	25459473	TSS	True	1	0.891164	0.923182	0.00021349	0.913641	4.18825e-05	0.919105	0.00015411									0.0861343	0.000400517	0.880576	0.00278136	1		0.919081	0.00892659
RFFL	ENSG00000092871.17	chr17	-	35017606	35026373	ES	False	1	0.698309	0.801055	2.15448e-05	0.847167	2.59507e-05	0.815054	1.84801e-05	0.0865651	0.000407391	0.161387	9.60013e-05	0.644782	3.63753e-05	0.449711	0.0486804	0.837746	0.511701	0.805407	0.0188131	0.738517	0.0114845	0.787686	0.017888
HLA-E	ENSG00000230254.7	GL000256.2	+	1790278	1790364	TSS	False									0.0865651	0.00040881	0.96201	4.79579e-07	0.919282	1.47854e-06	0.935791	0.000388663	0.800462	0.434162	0.778722	0.0116698	0.851346	0.00809768	0.807929	0.0116784
MAP3K8	ENSG00000107968.10	chr10	+	30434378	30438915	IR	True									0.0865651	0.000409036	0.287074	0.0100023	0.0414953	0.000228999	0.12536	0.0161316	0.586879	0.114973	0.227197	0.0189473	0.212933	3.96992e-05	0.210339	0.0107198
IG_locus_5	IG_locus_5	chr14	-	106154037	106154161	TSS	False									0.0866348	0.000411411	5.53027e-05	3.00013e-11	0.107002	0.0590692	0.0727789	0.0382398
PB_novel_18980	PB_novel_18980	chr5	+	112529818	112532589	PAS	True									0.0866348	0.000413931	0.305442	0.0793359	0.079941	0.000428065	0.207749	0.0377446
CRBN	ENSG00000113851.14	chr3	-	3153488	3154746	ES	True									0.0866348	0.00041304	0.860668	0.0022652	0.705344	0.00493574	0.771571	0.0100159	0.788238	0.409704	0.788099	0.0242177	0.711344	0.0534187	0.751523	0.0386326
TENT5C	ENSG00000183508.5	chr1	+	117606047	117606153	TSS	True																	0.0868318	0.000408227	0.9061	0.00203221	0.676233	0.0837843	0.845009	0.0172076
IG_locus_0	IG_locus_0	KI270846.1	-	473255	473350	TSS	False																	0.0868318	0.000418558	0.114342	0.0268023	0.0216721	9.09134e-05	0.0830777	0.0141716
RAB1A	ENSG00000138069.18	chr2	-	65088690	65088938	IR	True									0.920266	0.570013	0.205596	0.0110592	0.252229	0.00927594	0.233181	0.0100739	0.0868318	0.000416229	0.0956946	0.00134911	0.0289984	0.000465773	0.0652727	0.00231954
COPG2	ENSG00000158623.14	chr7	-	130552430	130555036	ES	True																	0.0874504	0.000425798	0.881622	1.27305e-05	1		0.943102	0.00342174
KIF23	ENSG00000137807.16	chr15	+	69426457	69429110	5AS	False	1	0.557085	0.0838801	0.000133691	0.0989952	0.00106616	0.0914441	0.000569354									0.0874504	0.000424633	0.0700694	1.73432e-06	0.0245445	1.3444e-06	0.0586062	0.000115659
PPP6R3	ENSG00000110075.15	chr11	+	68564432	68567013	3AS	False																	0.0877421	0.00043149	0.171109	0.00855346	0		0.105893	0.0169088
SLC43A2	ENSG00000167703.15	chr17	-	1574377	1575765	PAS	True																	0.0892597	0.000441127	0.510294	0.0521178	0.963492	1.27283e-06	0.674501	0.0725587
GLRX2	ENSG00000023572.10	chr1	-	193091021	193094939	PAS	True	0.0897585	0.00026577	0.703075	3.06541e-05	0.103521	0.0400537	0.377257	0.0940335
SELP	ENSG00000174175.17	chr1	-	169589565	169590146	3AS	False									0.718606	0.128242	0.445705	0.000117322	0.540862	0.00216346	0.503062	0.00446508	0.090417	0.000451186	0.136711	5.84735e-06	0.371631	0.0237499	0.211544	0.0118369
TAOK3	ENSG00000135090.14	chr12	-	118149930	118150082	PAS	True																	0.0907588	0.000455164	0.078476	0.00165051	0.00966669	1.51607e-06	0.0500807	0.00212178
ADORA2A	ENSG00000128271.22	chr22	+	24427596	24427746	TSS	True									0.9979	0.912702	0.690403	0.000117726	0.656281	7.21479e-05	0.668508	8.31799e-05	0.091999	0.000463752	0.588664	3.31789e-05	0.370347	6.39529e-05	0.484052	0.00870751
DLEU2	ENSG00000231607.12	chr13	-	50081822	50081989	TSS	True									0.947317	0.676324	0.682847	0.0101798	0.603036	0.0144418	0.64038	0.0145231	0.092022	0.00046822	0.848911	0.0044683	0.98886	2.15524e-07	0.89199	0.00688579
TYMP	ENSG00000025708.14	chr22	-	50527283	50529903	ES	True																	0.0927256	0.000480697	0.654375	0.0488839	0.952474	1.35201e-06	0.785878	0.0381045
PARP2	ENSG00000129484.14	chr14	+	20354947	20355751	IR	True	1	0.920963	0.16118	0.00596047	0.137002	0.000957793	0.145502	0.00265866	0.84531	0.331745	0.13064	0.00191854	0.181936	0.00276058	0.159662	0.00303324	0.0927256	0.000479601	0.134282	3.40395e-05	0.0250584	0.00185728	0.089721	0.00331735
MMUT	ENSG00000146085.8	chr6	-	49448927	49451465	3AS	True																	0.0927256	0.00048083	0.105063	8.65056e-06	0.00522839	6.61452e-05	0.0621353	0.0055055
DDX19A	ENSG00000168872.17	chr16	+	70356247	70361417	ES	False									0.0944506	0.000464547	0.0904996	0.000473462	0.187769	0.000428047	0.147877	0.00341475	1	0.986767	0.0727523	0.00406443	0.0796016	0.00464361	0.0756559	0.00435876
NOSIP	ENSG00000142546.14	chr19	-	49559933	49560413	TSS	False									0.0946403	0.000467142	0.481634	9.86694e-06	0.428103	0.0372195	0.458379	0.0173644
RPF1	ENSG00000117133.11	chr1	+	84482995	84489632	3AS	True									0.0967674	0.00048614	0.205367	0.0697998	0.041454	0.000319779	0.131824	0.0303685
TIMP1	ENSG00000102265.12	chrX	+	47586520	47586788	PAS	False																	0.0971107	0.000505933	0.991891	2.23011e-07	0.822525	0.0081282	0.922132	0.0129542
GUSB	ENSG00000169919.17	chr7	-	65974704	65976014	ES	False	1	0.199885	0.782554	8.64387e-06	0.766473	0.00844834	0.775005	0.00309178	0.813828	0.268588	0.736354	0.00165565	0.781943	0.005416	0.761279	0.00425415	0.097513	0.000512777	0.661223	1.83721e-05	0.763471	2.69004e-05	0.710098	0.00248495
ZFAND6	ENSG00000086666.19	chr15	+	80120498	80121747	IR	True									0.625286	0.0562826	0.773143	0.0415782	0.922442	0.0030684	0.860834	0.0203797	0.0988184	0.000524452	0.231388	0.00714028	0.142836	0.122425	0.207921	0.0514808
TBC1D15	ENSG00000121749.15	chr12	+	71873003	71884810	ES	False																	0.0988184	0.00052395	0.936717	5.28448e-05	0.977781	0.000517926	0.951299	0.000739322
ATF2	ENSG00000115966.17	chr2	-	175080765	175093060	ES	False	1	0.405218	0.0478238	8.757e-05	0.0696049	0.00154208	0.0592838	0.000659788	0.0989865	0.000502505	0.111972	0.0024955	0.202596	0.000403014	0.164394	0.00367375	0.566508	0.0982882	0.345539	0.040841	0.204677	0.00385022	0.283599	0.0322881
GPCPD1	ENSG00000125772.14	chr20	-	5575480	5575815	3AS	True									0.0989865	0.00050127	0.929986	0.00133235	0.890914	9.26531e-05	0.907432	0.00111827	0.815737	0.463752	0.920488	0.000380662	0.934692	0.00079673	0.924458	0.000485562
GPR89A	ENSG00000117262.19	chr1	+	145643978	145645646	IR	True	1	0.395994	0.599764	0.00501333	0.711664	0.0324315	0.646216	0.0148997	0.0998554	0.00050867	0.610232	0.0207685	0.333297	4.35678e-05	0.460223	0.0216785
ITGAM	ENSG00000169896.18	chr16	+	31331802	31332237	IR	True																	0.0998925	0.000532585	0.746617	0.0144227	0.886272	0.000102237	0.820789	0.0101652

## Sheet: README
Supplemental Table S2. Union of significant alternative splicing events between SF3B1mut/wt and SF3B1wt/wt detected in cell lines, CLL, or MDS patients.
