# Supplementary material for: Long-read transcriptome sequencing of CLL and MDS patients uncovers molecular effects of SF3B1 mutations
Source: HighWire-hosted journal article supplement (doi:10.1101/gr.279327.124), 2024-09-13
Supplement: Supplemental_Table_S3.xlsx [file Supplemental_Table_S3.xlsx]

## Sheet: DE MDS v CLL IsoSeq
# Differentially expressed genes reported by DESeq2
	baseMean	log2 Fold Change	lfcSE	stat	pvalue	padj
ENSG00000196565.15	238.272	27.1986	1.13344	23.9966	3.02095e-127	4.82234e-123
ENSG00000102445.20	661.546	-6.97152	0.299852	-23.2498	1.42762e-119	1.13945e-115
ENSG00000244734.4	11254.4	16.9948	0.776719	21.8803	4.00428e-106	2.13068e-102
ENSG00000204103.4	198.69	27.8494	1.319	21.1139	5.92462e-99	2.36437e-95
ENSG00000135046.14	935.232	12.0843	0.572913	21.0926	9.29229e-99	2.96666e-95
ENSG00000206172.8	3699.1	15.5738	0.739498	21.06	1.85295e-98	4.92977e-95
ENSG00000100985.7	575.79	29.5142	1.42565	20.7022	3.30601e-95	7.53911e-92
ENSG00000136929.13	378.995	12.8662	0.629648	20.4339	8.35109e-93	1.66636e-89
ENSG00000158856.18	81.3365	25.8095	1.26783	20.3572	4.00689e-92	7.10689e-89
ENSG00000178726.7	26.9276	25.101	1.23994	20.2437	4.03333e-91	6.43841e-88
ENSG00000012223.13	9446.49	17.8585	0.908606	19.6549	5.25434e-86	7.625e-83
ENSG00000188536.13	5211.64	14.6579	0.751508	19.5046	1.00374e-84	1.33523e-81
ENSG00000096006.12	553.975	13.8389	0.711162	19.4596	2.41808e-84	2.96922e-81
ENSG00000161642.18	14.2738	23.0183	1.18419	19.4381	3.67654e-84	4.19204e-81
ENSG00000154262.13	96.4033	-9.25885	0.488225	-18.9643	3.36545e-80	3.58151e-77
ENSG00000135218.19	286.38	12.1691	0.648368	18.7688	1.3602e-78	1.35705e-75
ENSG00000090382.7	3993.44	12.006	0.642439	18.6881	6.1834e-78	5.80621e-75
ENSG00000143797.12	63.9988	10.2922	0.553434	18.597	3.39788e-77	3.01335e-74
ENSG00000169429.11	2704.59	12.0392	0.650779	18.4997	2.07615e-76	1.7443e-73
ENSG00000132185.18	191.548	-7.89336	0.434095	-18.1835	6.97619e-74	5.56805e-71
ENSG00000147454.14	264.291	7.655	0.432289	17.7081	3.63274e-70	2.7614e-67
ENSG00000143546.10	2889.57	16.1707	0.922026	17.5382	7.31468e-69	5.30746e-66
ENSG00000138772.13	89.3155	11.1996	0.638941	17.5284	8.70063e-69	6.03862e-66
ENSG00000163617.11	89.1108	-7.9146	0.455745	-17.3663	1.48524e-67	9.87868e-65
ENSG00000163220.11	887.994	14.2996	0.824995	17.333	2.65212e-67	1.69343e-64
ENSG00000104267.10	201.637	11.335	0.657634	17.236	1.42498e-66	8.74886e-64
ENSG00000118113.12	449.856	13.5002	0.783521	17.2301	1.57781e-66	9.32835e-64
ENSG00000109684.15	26.5082	-7.54206	0.446694	-16.8842	5.88238e-64	3.35359e-61
ENSG00000144218.19	43.4423	-4.90032	0.292317	-16.7637	4.49702e-63	2.47538e-60
ENSG00000058091.17	115.96	-4.43681	0.264923	-16.7475	5.9034e-63	3.1412e-60
ENSG00000145569.6	39.1364	9.28585	0.555395	16.7194	9.47216e-63	4.87755e-60
ENSG00000112077.17	196.111	12.2108	0.733003	16.6586	2.62278e-62	1.30836e-59
ENSG00000070081.17	522.259	9.69369	0.582573	16.6395	3.60902e-62	1.74578e-59
ENSG00000086548.9	414.517	13.4266	0.810506	16.5657	1.23301e-61	5.78901e-59
ENSG00000126787.13	164.879	10.0401	0.607112	16.5375	1.97013e-61	8.98548e-59
ENSG00000130830.15	131.906	6.63457	0.401482	16.5252	2.41723e-61	1.07184e-58
ENSG00000170180.22	425.804	13.3242	0.807327	16.5041	3.42569e-61	1.47795e-58
ENSG00000132704.16	133.524	-7.69725	0.46782	-16.4534	7.92418e-61	3.32878e-58
ENSG00000148175.13	360.655	6.83342	0.415884	16.4311	1.14622e-60	4.69155e-58
ENSG00000095585.17	112.554	-5.03419	0.310748	-16.2002	5.02487e-59	2.0053e-56
ENSG00000082074.19	50.7915	9.46306	0.584862	16.18	6.98077e-59	2.7179e-56
ENSG00000171848.16	216.844	8.89184	0.552677	16.0887	3.06308e-58	1.16419e-55
ENSG00000065154.12	146.146	3.98733	0.248947	16.0168	9.74964e-58	3.61938e-55
ENSG00000122862.5	6802.98	8.06491	0.50733	15.8968	6.66985e-57	2.41979e-54
ENSG00000112742.10	54.097	5.49218	0.346472	15.8517	1.36798e-56	4.85267e-54
ENSG00000188313.13	109.776	5.94525	0.375796	15.8204	2.24965e-56	7.80678e-54
ENSG00000118520.15	75.4711	10.9081	0.690224	15.8037	2.93455e-56	9.96684e-54
ENSG00000143226.15	122.928	8.42827	0.535061	15.752	6.65725e-56	2.21395e-53
ENSG00000155962.13	68.9477	8.21291	0.523973	15.6743	2.2671e-55	7.38566e-53
ENSG00000111863.13	59.6437	-6.39993	0.409783	-15.6178	5.50424e-55	1.75728e-52
ENSG00000226571.2	35.5294	-7.09036	0.45849	-15.4646	6.01417e-54	1.88244e-51
ENSG00000079263.19	234.826	-4.84881	0.315708	-15.3585	3.10505e-53	9.5319e-51
ENSG00000109743.11	41.6117	9.82972	0.643798	15.2683	1.24308e-52	3.67469e-50
ENSG00000133742.14	568.396	13.7742	0.902089	15.2693	1.22562e-52	3.67469e-50
ENSG00000242550.6	59.4153	10.4808	0.688799	15.2161	2.76683e-52	8.03036e-50
ENSG00000124469.12	231.988	12.5767	0.828106	15.1872	4.29601e-52	1.22459e-49
ENSG00000085265.11	120.554	11.6008	0.765249	15.1595	6.55991e-52	1.83712e-49
ENSG00000157456.8	40.8537	9.57772	0.632058	15.1532	7.21505e-52	1.98576e-49
ENSG00000159618.16	4.91534	19.9542	1.3262	15.0461	3.65943e-51	9.90094e-49
ENSG00000116191.17	83.357	-4.60622	0.306367	-15.035	4.33086e-51	1.15223e-48
ENSG00000090376.11	19.9933	8.82327	0.587846	15.0095	6.3637e-51	1.66531e-48
ENSG00000102837.7	198.352	12.0399	0.80345	14.9852	9.16927e-51	2.36079e-48
ENSG00000100504.17	274.33	11.083	0.740265	14.9717	1.12364e-50	2.84709e-48
ENSG00000173391.9	73.4305	10.8808	0.732604	14.8522	6.72962e-50	1.67851e-47
ENSG00000145386.11	104.874	8.84394	0.602501	14.6787	8.82489e-49	2.16726e-46
ENSG00000158578.21	286.219	12.444	0.848149	14.6719	9.75515e-49	2.35941e-46
ENSG00000163993.7	102.441	11.3978	0.777552	14.6586	1.18748e-48	2.82923e-46
TR_locus_5	48.7277	6.07518	0.416486	14.5868	3.41019e-48	8.00541e-46
ENSG00000138449.11	39.4794	6.98743	0.479793	14.5634	4.7994e-48	1.11033e-45
ENSG00000170312.16	147.1	9.77263	0.671657	14.55	5.8372e-48	1.33113e-45
ENSG00000150625.16	60.8945	-8.90958	0.614772	-14.4925	1.35138e-47	3.03832e-45
ENSG00000143162.9	121.045	4.62298	0.319204	14.4828	1.55568e-47	3.44907e-45
ENSG00000087253.13	36.9205	8.53685	0.589505	14.4814	1.58862e-47	3.47385e-45
ENSG00000135838.13	48.8356	5.38318	0.373702	14.405	4.81425e-47	1.03851e-44
ENSG00000165092.13	30.2461	9.28571	0.647987	14.3301	1.4192e-46	3.02063e-44
ENSG00000088325.16	131.681	6.85661	0.479722	14.2929	2.42379e-46	5.09091e-44
ENSG00000171241.9	58.7921	5.81259	0.407819	14.2529	4.30298e-46	8.92058e-44
ENSG00000184557.4	38.848	25.0139	1.75952	14.2163	7.26276e-46	1.48635e-43
ENSG00000064763.11	41.823	9.4455	0.666161	14.179	1.23583e-45	2.49717e-43
ENSG00000223745.8	58.4066	-3.83209	0.270288	-14.1778	1.25696e-45	2.50811e-43
ENSG00000101425.14	166.68	12.107	0.855209	14.1567	1.69686e-45	3.34406e-43
ENSG00000071073.13	31.8895	6.77522	0.478764	14.1515	1.82901e-45	3.56055e-43
ENSG00000166947.15	143.619	11.6644	0.825625	14.1279	2.55538e-45	4.91463e-43
ENSG00000137807.16	78.0171	8.12658	0.576956	14.0853	4.67903e-45	8.89183e-43
ENSG00000145335.17	68.4961	10.6405	0.756578	14.064	6.31932e-45	1.18677e-42
ENSG00000011422.12	34.7228	9.32084	0.662942	14.0598	6.70625e-45	1.24479e-42
ENSG00000150681.10	272.662	11.1167	0.791042	14.0533	7.35471e-45	1.34946e-42
ENSG00000081189.16	243.672	-4.22686	0.301267	-14.0303	1.01732e-44	1.84539e-42
ENSG00000166527.8	20.6976	9.08652	0.649736	13.9849	1.92639e-44	3.45517e-42
ENSG00000115828.17	47.0115	8.54044	0.61122	13.9728	2.28586e-44	4.05436e-42
ENSG00000113140.11	53.9468	9.88945	0.708713	13.9541	2.97034e-44	5.21049e-42
ENSG00000204010.3	104.935	11.2481	0.806221	13.9517	3.07337e-44	5.33263e-42
ENSG00000011198.10	26.5647	3.50115	0.251305	13.9319	4.05615e-44	6.96219e-42
ENSG00000119326.15	38.1388	5.40902	0.388364	13.9277	4.29927e-44	7.30099e-42
ENSG00000156052.11	16.3647	8.13613	0.584922	13.9098	5.52487e-44	9.28353e-42
ENSG00000154511.12	18.897	-4.99342	0.359419	-13.893	6.98432e-44	1.16136e-41
ENSG00000196628.20	31.6545	-4.07443	0.293665	-13.8744	9.0488e-44	1.48913e-41
ENSG00000185246.18	51.84	-3.12719	0.225946	-13.8404	1.45302e-43	2.3668e-41
ENSG00000077232.18	185.032	-3.30553	0.239008	-13.8302	1.67488e-43	2.70061e-41
ENSG00000223609.11	189.179	12.2756	0.887661	13.8292	1.69923e-43	2.71248e-41
ENSG00000113448.19	23.9669	8.16031	0.590572	13.8176	1.995e-43	3.15308e-41
ENSG00000072110.15	133.5	11.5444	0.835733	13.8135	2.11345e-43	3.30755e-41
ENSG00000134321.12	37.8901	9.58936	0.69473	13.803	2.44451e-43	3.78852e-41
ENSG00000123405.14	39.4673	9.81712	0.712818	13.7723	3.74347e-43	5.74587e-41
ENSG00000162894.12	396.53	-5.75912	0.418435	-13.7635	4.22763e-43	6.42721e-41
ENSG00000090013.11	47.6808	8.22566	0.59811	13.7528	4.9029e-43	7.38349e-41
ENSG00000258227.7	38.4452	9.96951	0.728273	13.6892	1.17727e-42	1.75633e-40
ENSG00000091972.18	74.0799	-5.5087	0.402885	-13.6731	1.46941e-42	2.17187e-40
ENSG00000257017.9	23.6609	9.23598	0.678249	13.6174	3.15626e-42	4.62232e-40
ENSG00000186088.16	90.9054	-4.04273	0.297487	-13.5896	4.61805e-42	6.70162e-40
ENSG00000228716.7	198.497	5.70067	0.420523	13.5562	7.28538e-42	1.04772e-39
ENSG00000148346.12	73.9854	10.7875	0.79625	13.5479	8.15307e-42	1.16203e-39
ENSG00000151490.15	19.7799	-4.68015	0.346449	-13.5089	1.38542e-41	1.95712e-39
ENSG00000096093.16	24.2638	-3.61468	0.268473	-13.4639	2.55238e-41	3.574e-39
ENSG00000169877.10	152.896	11.9987	0.891528	13.4586	2.73955e-41	3.80274e-39
ENSG00000175029.17	14.2548	8.30654	0.617795	13.4454	3.2742e-41	4.50569e-39
ENSG00000015475.19	19.884	4.6792	0.34882	13.4144	4.98199e-41	6.79722e-39
ENSG00000109805.10	98.1248	7.58755	0.566712	13.3887	7.03903e-41	9.52238e-39
ENSG00000176597.12	30.0599	8.67952	0.648764	13.3785	8.07113e-41	1.08268e-38
ENSG00000100448.4	115.145	11.3796	0.851478	13.3645	9.74492e-41	1.29632e-38
ENSG00000117650.13	38.2169	7.47114	0.559362	13.3566	1.08473e-40	1.43104e-38
ENSG00000149516.14	223.702	12.4771	0.934544	13.351	1.16933e-40	1.53e-38
ENSG00000024526.17	29.1547	8.86876	0.665688	13.3227	1.70813e-40	2.21683e-38
ENSG00000112299.8	28.4429	8.49009	0.637474	13.3183	1.81128e-40	2.33174e-38
ENSG00000162747.12	97.1539	11.0569	0.83074	13.3098	2.03158e-40	2.59441e-38
ENSG00000187037.8	12.1142	8.15559	0.613689	13.2895	2.66522e-40	3.37658e-38
ENSG00000164104.12	261.492	3.85246	0.290568	13.2584	4.03488e-40	5.07156e-38
ENSG00000138134.12	22.8581	-3.56596	0.26906	-13.2534	4.31378e-40	5.37976e-38
ENSG00000082512.15	48.6933	-4.00916	0.30285	-13.2381	5.28403e-40	6.53868e-38
ENSG00000007392.17	68.8166	-3.31606	0.250527	-13.2363	5.41327e-40	6.64708e-38
ENSG00000135047.16	49.8476	10.1636	0.768268	13.2293	5.94528e-40	7.24462e-38
ENSG00000005381.8	490.853	13.6304	1.03136	13.216	7.09478e-40	8.57985e-38
ENSG00000173200.13	46.7908	-4.5141	0.341634	-13.2132	7.35856e-40	8.83194e-38
ENSG00000185483.12	34.4431	-7.9115	0.599278	-13.2017	8.57539e-40	1.02156e-37
ENSG00000114126.18	51.7881	3.46424	0.262422	13.2011	8.65203e-40	1.02305e-37
ENSG00000137804.14	133.199	4.72681	0.358543	13.1834	1.09383e-39	1.27854e-37
ENSG00000133048.13	51.4396	10.3705	0.786651	13.1831	1.09729e-39	1.27854e-37
ENSG00000156738.18	1887.94	-6.23874	0.473638	-13.1719	1.27277e-39	1.47226e-37
ENSG00000155189.12	47.0478	-3.28317	0.249617	-13.1529	1.63864e-39	1.88184e-37
ENSG00000284980.2	46.4937	-3.21838	0.245819	-13.0925	3.63518e-39	4.14489e-37
ENSG00000134827.8	43.7749	10.0892	0.770817	13.0889	3.80909e-39	4.31237e-37
ENSG00000105205.7	146.249	11.5905	0.885941	13.0827	4.13759e-39	4.65129e-37
ENSG00000169607.13	37.5974	8.61142	0.65934	13.0607	5.52392e-39	6.16632e-37
ENSG00000026103.22	34.2078	3.76872	0.288824	13.0485	6.4802e-39	7.18357e-37
ENSG00000023909.10	56.1773	5.27664	0.407255	12.9566	2.15601e-38	2.37355e-36
ENSG00000198805.12	63.9617	4.83399	0.373117	12.9557	2.18144e-38	2.38509e-36
ENSG00000138639.18	139.59	-3.77686	0.291546	-12.9546	2.21239e-38	2.40248e-36
ENSG00000172322.14	34.2386	7.94962	0.616333	12.8983	4.6039e-38	4.96568e-36
ENSG00000128951.14	69.453	3.96464	0.307578	12.8899	5.13134e-38	5.43868e-36
ENSG00000115607.9	21.3514	7.44489	0.57757	12.89	5.12236e-38	5.43868e-36
ENSG00000277571.2	147.138	11.9291	0.925476	12.8897	5.14465e-38	5.43868e-36
ENSG00000256269.10	160.401	6.8992	0.535293	12.8886	5.21548e-38	5.47728e-36
ENSG00000139132.14	8.44037	7.45381	0.57894	12.8749	6.22946e-38	6.4994e-36
ENSG00000165304.8	20.692	7.67655	0.596369	12.8722	6.45736e-38	6.69344e-36
ENSG00000163191.6	43.423	6.87816	0.535068	12.8547	8.08963e-38	8.33128e-36
ENSG00000197465.14	49.6269	9.82381	0.766528	12.816	1.3345e-37	1.36555e-35
ENSG00000123485.12	29.2745	8.23047	0.642237	12.8153	1.34585e-37	1.36839e-35
ENSG00000177156.11	117.612	4.57295	0.357072	12.8068	1.50216e-37	1.51766e-35
ENSG00000196937.11	55.7441	-4.00579	0.313537	-12.7761	2.22857e-37	2.2374e-35
ENSG00000284983.1	310.625	12.9592	1.0151	12.7664	2.52602e-37	2.52017e-35
ENSG00000118308.15	474.652	-3.66916	0.287649	-12.7557	2.89839e-37	2.86732e-35
ENSG00000134326.11	43.6939	9.09471	0.71301	12.7554	2.90989e-37	2.86732e-35
ENSG00000284835.2	312.555	12.9743	1.01727	12.754	2.961e-37	2.89978e-35
ENSG00000134198.10	20.1738	8.43014	0.661144	12.7508	3.08384e-37	2.9942e-35
ENSG00000089685.15	33.4202	8.57669	0.672652	12.7506	3.09492e-37	2.9942e-35
ENSG00000121957.15	19.0539	5.92571	0.465031	12.7426	3.42694e-37	3.29543e-35
ENSG00000165322.18	28.1474	-2.8451	0.224151	-12.6928	6.48338e-37	6.19726e-35
ENSG00000104043.15	34.896	8.54633	0.67341	12.6911	6.62299e-37	6.29302e-35
ENSG00000153064.12	208.526	-4.62737	0.365362	-12.6652	9.22312e-37	8.71175e-35
ENSG00000115738.10	24.6136	8.84794	0.698887	12.66	9.8444e-37	9.24389e-35
ENSG00000163221.9	229.997	11.9783	0.947406	12.6433	1.2188e-36	1.13776e-34
ENSG00000171051.9	31.8971	9.62075	0.760994	12.6423	1.23326e-36	1.14456e-34
ENSG00000143297.19	59.7177	-6.00178	0.475043	-12.6342	1.36829e-36	1.26255e-34
ENSG00000078589.13	110.231	-4.01625	0.318055	-12.6275	1.48909e-36	1.36611e-34
ENSG00000134460.18	45.2315	-5.61928	0.445704	-12.6076	1.91672e-36	1.74837e-34
ENSG00000163554.15	17.9704	8.69685	0.689897	12.606	1.95648e-36	1.7745e-34
ENSG00000112984.12	53.2663	8.8751	0.704383	12.5998	2.11593e-36	1.90828e-34
ENSG00000140416.23	20.0012	3.72118	0.295746	12.5823	2.64083e-36	2.36829e-34
ENSG00000011426.11	28.4673	8.27304	0.657598	12.5807	2.6964e-36	2.40461e-34
ENSG00000168497.5	40.7981	7.7739	0.618755	12.5638	3.33973e-36	2.96179e-34
ENSG00000135842.17	11.8242	7.05477	0.563762	12.5137	6.27998e-36	5.53853e-34
ENSG00000152766.6	12.1723	8.30365	0.664223	12.5013	7.34349e-36	6.44089e-34
ENSG00000206047.2	307.36	12.9393	1.03553	12.4953	7.9165e-36	6.90552e-34
ENSG00000159339.13	34.4917	9.82601	0.78902	12.4534	1.33961e-35	1.16218e-33
ENSG00000241399.7	30.279	7.42871	0.597987	12.4229	1.96409e-35	1.69475e-33
ENSG00000101307.16	62.2722	9.95022	0.801084	12.4209	2.01159e-35	1.7264e-33
ENSG00000183019.7	11.9848	7.9814	0.643598	12.4012	2.57362e-35	2.19693e-33
ENSG00000077984.6	39.0241	9.27155	0.747821	12.3981	2.67652e-35	2.27262e-33
ENSG00000169679.15	134.657	5.95978	0.4809	12.393	2.85212e-35	2.40891e-33
ENSG00000102524.11	32.9463	5.70296	0.460346	12.3884	3.01935e-35	2.53673e-33
ENSG00000165209.19	69.834	-4.36124	0.352225	-12.382	3.27276e-35	2.73524e-33
ENSG00000161551.14	12.6598	-3.40078	0.274677	-12.381	3.31155e-35	2.75325e-33
ENSG00000106066.15	28.5923	7.85809	0.635226	12.3705	3.77241e-35	3.12015e-33
ENSG00000256223.6	39.4836	-3.47989	0.281746	-12.3511	4.80201e-35	3.95126e-33
ENSG00000121152.10	44.6319	7.05666	0.571713	12.343	5.31407e-35	4.35018e-33
ENSG00000146856.14	16.9352	-3.99269	0.323853	-12.3287	6.34417e-35	5.16694e-33
ENSG00000136868.11	13.4941	4.36996	0.354467	12.3283	6.38007e-35	5.1698e-33
ENSG00000115271.11	315.886	5.06196	0.410829	12.3213	6.953e-35	5.6056e-33
ENSG00000144354.14	75.8951	6.74233	0.547287	12.3195	7.10948e-35	5.70295e-33
PB_novel_19831	5.95055	-5.19771	0.422007	-12.3167	7.36882e-35	5.88143e-33
ENSG00000135185.12	19.8778	-2.85959	0.232204	-12.315	7.51999e-35	5.97222e-33
ENSG00000133818.14	26.2386	-4.34839	0.353419	-12.3038	8.64366e-35	6.83063e-33
ENSG00000176890.16	41.8882	7.84127	0.638	12.2904	1.02006e-34	8.0213e-33
ENSG00000129071.10	233.659	-1.71602	0.139639	-12.289	1.03796e-34	8.12201e-33
ENSG00000206177.7	27.5851	9.45338	0.770448	12.27	1.31296e-34	1.02238e-32
ENSG00000164047.6	198.617	12.3603	1.00748	12.2685	1.3367e-34	1.03581e-32
ENSG00000119917.14	100.796	6.64192	0.542868	12.2349	2.02406e-34	1.56088e-32
ENSG00000072571.20	77.9339	5.3441	0.438137	12.1973	3.21132e-34	2.46453e-32
ENSG00000120278.16	27.1842	-5.48707	0.450472	-12.1807	3.93809e-34	3.00784e-32
ENSG00000140386.13	20.2754	-2.6078	0.214118	-12.1793	4.00927e-34	3.04762e-32
ENSG00000240247.7	302.485	12.9279	1.06166	12.177	4.11993e-34	3.11689e-32
ENSG00000163935.14	41.7613	-4.02955	0.330988	-12.1743	4.2605e-34	3.20803e-32
ENSG00000171049.9	23.7296	9.15862	0.752586	12.1695	4.51659e-34	3.3849e-32
ENSG00000058335.16	16.7666	-7.091	0.582745	-12.1683	4.58732e-34	3.42184e-32
ENSG00000143416.21	65.0371	10.4326	0.862457	12.0964	1.1035e-33	8.19308e-32
ENSG00000093134.15	17.6857	8.71336	0.721151	12.0826	1.30573e-33	9.64967e-32
ENSG00000197385.6	9.86658	-6.28417	0.521216	-12.0567	1.78706e-33	1.3146e-31
ENSG00000143476.18	52.367	4.41796	0.367112	12.0344	2.34441e-33	1.71669e-31
ENSG00000101162.4	30.2918	7.58626	0.630649	12.0293	2.49327e-33	1.81735e-31
ENSG00000102010.15	21.2414	9.14573	0.761277	12.0137	3.01183e-33	2.18536e-31
ENSG00000175471.19	10.0191	7.57868	0.631904	11.9934	3.84734e-33	2.77897e-31
ENSG00000120008.16	246.156	-4.50039	0.37528	-11.9921	3.90894e-33	2.80395e-31
ENSG00000146757.14	198.979	-2.89204	0.241166	-11.9919	3.91707e-33	2.80395e-31
ENSG00000197405.8	278.484	9.72839	0.812051	11.98	4.52236e-33	3.22278e-31
ENSG00000104921.15	42.6608	-6.21519	0.518888	-11.9779	4.63924e-33	3.29139e-31
ENSG00000103569.10	83.8429	11.0717	0.924733	11.9729	4.93051e-33	3.48255e-31
ENSG00000106605.11	13.3331	7.13732	0.596632	11.9627	5.5742e-33	3.91986e-31
ENSG00000182903.16	43.7634	-3.44781	0.288437	-11.9534	6.22923e-33	4.36128e-31
ENSG00000173848.19	141.448	5.47982	0.458446	11.953	6.26036e-33	4.36394e-31
ENSG00000065675.15	14.5453	7.24884	0.60652	11.9515	6.3739e-33	4.4105e-31
ENSG00000157557.13	83.9633	8.82816	0.738671	11.9514	6.38242e-33	4.4105e-31
ENSG00000166803.14	90.2066	10.4264	0.874229	11.9265	8.61701e-33	5.92902e-31
ENSG00000147535.17	41.0352	-3.78086	0.317283	-11.9164	9.72708e-33	6.66409e-31
ENSG00000130348.11	56.1665	-2.47893	0.208034	-11.916	9.77195e-33	6.66622e-31
ENSG00000213934.9	225.02	12.4283	1.04343	11.911	1.03747e-32	7.04729e-31
ENSG00000280908.2	36.3303	9.90999	0.832408	11.9052	1.11182e-32	7.52032e-31
ENSG00000120833.14	10.6277	6.50728	0.546695	11.9029	1.14245e-32	7.69493e-31
ENSG00000133574.10	26.2082	9.41546	0.791972	11.8886	1.35625e-32	9.09653e-31
ENSG00000169385.3	103.879	11.35	0.957829	11.8497	2.15945e-32	1.44232e-30
ENSG00000175449.14	26.7322	6.8492	0.578613	11.8373	2.50428e-32	1.66566e-30
ENSG00000183960.9	10.5913	-6.33565	0.536014	-11.8199	3.07935e-32	2.03965e-30
ENSG00000004939.15	105.098	10.9194	0.925313	11.8008	3.86765e-32	2.55121e-30
ENSG00000042980.13	163.529	-4.41824	0.374918	-11.7845	4.69011e-32	3.081e-30
ENSG00000085063.17	56.392	3.97576	0.337393	11.7838	4.73179e-32	3.09564e-30
ENSG00000197249.14	97.9428	10.115	0.858527	11.7818	4.84567e-32	3.1572e-30
ENSG00000197208.6	14.6514	8.48417	0.720389	11.7772	5.11625e-32	3.31995e-30
ENSG00000173221.14	40.744	9.22104	0.783191	11.7737	5.33482e-32	3.44776e-30
ENSG00000186265.10	53.3789	-5.10275	0.434373	-11.7474	7.28225e-32	4.68736e-30
ENSG00000072694.21	41.5735	-4.16622	0.355889	-11.7065	1.17993e-31	7.56435e-30
ENSG00000139291.14	38.1218	-2.86868	0.245067	-11.7057	1.19202e-31	7.61128e-30
ENSG00000240303.8	48.4016	-3.38395	0.289106	-11.7049	1.20339e-31	7.65328e-30
ENSG00000035499.13	27.2411	6.88752	0.588963	11.6943	1.36286e-31	8.63308e-30
ENSG00000162599.17	13.3303	7.4597	0.638336	11.6862	1.49998e-31	9.4641e-30
ENSG00000164398.15	20.2554	8.72336	0.746787	11.6812	1.59046e-31	9.99549e-30
ENSG00000171860.5	31.0191	7.51888	0.644329	11.6693	1.82888e-31	1.14488e-29
ENSG00000138640.15	21.9064	6.59865	0.565814	11.6622	1.98789e-31	1.23956e-29
ENSG00000285417.1	18.9064	-4.77256	0.409405	-11.6573	2.10551e-31	1.30779e-29
ENSG00000213551.7	60.1604	2.75568	0.236509	11.6515	2.25428e-31	1.39477e-29
ENSG00000188672.19	17.5806	8.64359	0.742188	11.6461	2.40234e-31	1.48064e-29
ENSG00000197561.7	151.404	11.8226	1.01546	11.6426	2.50368e-31	1.53717e-29
ENSG00000094804.12	44.8869	6.95466	0.598281	11.6244	3.09717e-31	1.89426e-29
ENSG00000256594.8	33.301	-2.46902	0.212629	-11.6119	3.58512e-31	2.17602e-29
ENSG00000075340.23	48.8055	9.90918	0.853363	11.6119	3.58478e-31	2.17602e-29
ENSG00000185745.10	48.2664	7.64945	0.659063	11.6066	3.81678e-31	2.30785e-29
ENSG00000112029.10	65.6957	3.43802	0.29661	11.591	4.57638e-31	2.75671e-29
ENSG00000082146.13	421.174	5.15841	0.445231	11.5859	4.8575e-31	2.91505e-29
ENSG00000163823.4	61.3398	10.022	0.865109	11.5846	4.93053e-31	2.94779e-29
ENSG00000005189.20	13.5423	5.217	0.451814	11.5468	7.66296e-31	4.56432e-29
ENSG00000137642.13	20.3207	7.28594	0.632055	11.5274	9.60089e-31	5.69736e-29
ENSG00000174652.19	290.549	-4.19297	0.364432	-11.5055	1.23777e-30	7.31798e-29
ENSG00000072858.11	65.6018	-4.78125	0.41611	-11.4903	1.47527e-30	8.68991e-29
ENSG00000168386.18	16.2724	-5.84505	0.508927	-11.4851	1.56844e-30	9.20475e-29
PB_novel_19373	9.50006	-5.29787	0.46258	-11.4529	2.2744e-30	1.3299e-28
ENSG00000110693.18	13.8539	8.18106	0.715008	11.4419	2.58149e-30	1.49999e-28
ENSG00000166523.8	20.9088	9.01038	0.787496	11.4418	2.58409e-30	1.49999e-28
ENSG00000174123.11	113.396	-5.30845	0.464767	-11.4218	3.25609e-30	1.88322e-28
ENSG00000090612.22	29.4991	-2.21524	0.194	-11.4188	3.36996e-30	1.94205e-28
ENSG00000064225.12	10.0123	7.92937	0.694612	11.4155	3.49771e-30	2.00842e-28
ENSG00000164109.14	43.0946	5.49854	0.481723	11.4143	3.54662e-30	2.0292e-28
ENSG00000105835.12	1482.11	4.78416	0.419233	11.4117	3.65538e-30	2.08396e-28
ENSG00000066926.12	344.857	4.77323	0.419103	11.3891	4.73625e-30	2.69056e-28
ENSG00000163751.4	7.68075	7.28252	0.640227	11.3749	5.5761e-30	3.15643e-28
ENSG00000137198.10	24.4202	8.97068	0.788932	11.3707	5.85377e-30	3.3019e-28
ENSG00000226767.1	7.69586	-6.18873	0.544537	-11.3651	6.23801e-30	3.50624e-28
ENSG00000182568.17	31.8788	4.4975	0.395994	11.3575	6.80728e-30	3.81279e-28
ENSG00000107566.14	50.9395	3.71288	0.327046	11.3528	7.18519e-30	4.01039e-28
ENSG00000172232.10	67.0228	10.7522	0.947408	11.3491	7.49421e-30	4.1683e-28
ENSG00000117399.14	19.3135	8.07792	0.712752	11.3334	8.96387e-30	4.96841e-28
ENSG00000182481.10	81.4549	2.74915	0.242779	11.3237	1.00205e-29	5.53488e-28
ENSG00000073756.12	20.0904	8.15854	0.72108	11.3143	1.1145e-29	6.13477e-28
ENSG00000268119.6	17.4805	7.47718	0.661084	11.3105	1.16445e-29	6.38766e-28
ENSG00000115875.19	336.384	-1.91067	0.169082	-11.3002	1.30911e-29	7.15664e-28
ENSG00000102349.18	12.8142	-5.76544	0.510455	-11.2947	1.39383e-29	7.59377e-28
ENSG00000128383.13	12.5576	8.2487	0.730947	11.2849	1.55736e-29	8.45582e-28
ENSG00000117724.13	11.5054	7.63873	0.677254	11.279	1.66675e-29	9.01909e-28
ENSG00000005249.13	13.72	5.64386	0.500621	11.2737	1.76958e-29	9.54319e-28
ENSG00000177575.13	24.7579	8.88509	0.789648	11.252	2.26506e-29	1.21741e-27
ENSG00000167232.14	24.4854	-3.59015	0.319268	-11.2449	2.45295e-29	1.31398e-27
PB_novel_18110	10.1014	-6.32688	0.5642	-11.2139	3.48499e-29	1.86057e-27
ENSG00000076641.4	59.595	8.29923	0.74102	11.1997	4.08967e-29	2.17611e-27
ENSG00000148180.21	144.29	8.86246	0.791647	11.195	4.31578e-29	2.2888e-27
ENSG00000153310.19	282.268	2.01175	0.179788	11.1896	4.58603e-29	2.42407e-27
ENSG00000158869.11	53.2676	9.64536	0.862147	11.1876	4.68947e-29	2.47056e-27
ENSG00000149554.13	57.677	3.79832	0.339602	11.1846	4.8506e-29	2.54704e-27
ENSG00000125384.7	37.0754	9.34064	0.83531	11.1822	4.98136e-29	2.60713e-27
ENSG00000080819.9	37.0509	5.88922	0.52679	11.1794	5.14123e-29	2.68201e-27
ENSG00000137486.17	5.76208	6.86164	0.61385	11.178	5.22278e-29	2.71568e-27
ENSG00000119979.18	69.5583	2.23933	0.200435	11.1724	5.56677e-29	2.88514e-27
ENSG00000239839.7	235.47	12.2839	1.10194	11.1475	7.36442e-29	3.80447e-27
ENSG00000163534.15	108.793	-5.74034	0.515233	-11.1413	7.89904e-29	4.06749e-27
ENSG00000184293.7	22.6913	-4.94443	0.444701	-11.1186	1.01896e-28	5.23013e-27
ENSG00000124019.10	3.71928	6.25557	0.563102	11.1091	1.13263e-28	5.79495e-27
ENSG00000065328.17	34.9265	7.46432	0.672333	11.1021	1.22497e-28	6.24734e-27
ENSG00000003147.19	8.72303	6.65477	0.599528	11.1	1.2542e-28	6.37604e-27
ENSG00000250361.9	26.1899	9.27872	0.83602	11.0987	1.27313e-28	6.45174e-27
ENSG00000112303.14	163.373	4.31772	0.389071	11.0975	1.28956e-28	6.51432e-27
ENSG00000171320.15	28.5456	6.0001	0.541084	11.089	1.41813e-28	7.14122e-27
ENSG00000184661.14	26.7	6.62229	0.597724	11.0792	1.58302e-28	7.94647e-27
ENSG00000121552.4	72.307	10.9095	0.986353	11.0605	1.95086e-28	9.76223e-27
ENSG00000133789.15	108.908	-3.86603	0.349601	-11.0584	1.99612e-28	9.95753e-27
ENSG00000111052.7	7.40558	7.56376	0.685166	11.0393	2.46898e-28	1.2278e-26
ENSG00000144645.14	18.4836	-6.48741	0.589344	-11.0078	3.50283e-28	1.73651e-26
ENSG00000105374.10	12.3321	8.23341	0.749316	10.9879	4.36957e-28	2.15949e-26
ENSG00000165702.14	18.7685	8.74305	0.795932	10.9847	4.52867e-28	2.23121e-26
ENSG00000198157.11	61.5833	6.77436	0.617707	10.9669	5.51024e-28	2.69816e-26
ENSG00000163412.13	7.28623	7.51564	0.68529	10.9671	5.50065e-28	2.69816e-26
ENSG00000168615.13	30.3564	3.66611	0.334571	10.9576	6.10816e-28	2.98179e-26
ENSG00000073792.16	13.7182	7.98339	0.729057	10.9503	6.62314e-28	3.22333e-26
ENSG00000157554.19	23.481	7.53789	0.688658	10.9458	6.96319e-28	3.37852e-26
ENSG00000148773.14	6.57103	6.81136	0.624392	10.9088	1.04639e-27	5.06168e-26
ENSG00000164237.9	30.9301	7.70707	0.706898	10.9027	1.1194e-27	5.39847e-26
ENSG00000186205.13	13.2882	8.42838	0.774571	10.8814	1.41451e-27	6.80113e-26
ENSG00000008394.13	59.9039	10.5863	0.973404	10.8755	1.50824e-27	7.23002e-26
ENSG00000198336.9	6.94441	7.25346	0.667998	10.8585	1.8169e-27	8.68357e-26
ENSG00000163864.17	9.67264	7.53309	0.694085	10.8533	1.92447e-27	9.14297e-26
ENSG00000197632.9	45.6412	10.2346	0.94298	10.8534	1.92057e-27	9.14297e-26
ENSG00000189060.5	32.6646	7.14309	0.658573	10.8463	2.07608e-27	9.83395e-26
ENSG00000038427.16	50.4363	10.1247	0.934311	10.8366	2.30991e-27	1.09092e-25
ENSG00000160336.16	18.9561	-2.7636	0.255256	-10.8268	2.57084e-27	1.21057e-25
ENSG00000164292.13	27.9825	6.17639	0.570732	10.8219	2.71191e-27	1.27324e-25
PB_novel_19993	8.47709	-6.34637	0.586921	-10.813	2.98769e-27	1.39861e-25
ENSG00000132424.16	420.731	-2.003	0.185647	-10.7893	3.86594e-27	1.80444e-25
ENSG00000101236.17	13.3522	4.893	0.454186	10.7731	4.61134e-27	2.14609e-25
ENSG00000109674.4	8.67532	6.83064	0.634595	10.7638	5.10377e-27	2.36836e-25
ENSG00000198825.15	29.5477	-5.34487	0.497971	-10.7333	7.1026e-27	3.28634e-25
ENSG00000169062.15	29.099	-2.32601	0.216722	-10.7327	7.14944e-27	3.29845e-25
ENSG00000157796.18	20.6348	-3.07218	0.286295	-10.7308	7.29404e-27	3.35547e-25
ENSG00000047597.7	17.4976	7.91091	0.737311	10.7294	7.40725e-27	3.39776e-25
ENSG00000164687.11	46.0667	6.00224	0.559736	10.7233	7.90905e-27	3.61754e-25
ENSG00000135404.12	43.0739	4.16896	0.388884	10.7203	8.1724e-27	3.72732e-25
ENSG00000141447.18	9.28095	6.92684	0.646508	10.7142	8.72634e-27	3.96862e-25
ENSG00000132965.10	72.6441	4.87351	0.455856	10.6909	1.12261e-26	5.09098e-25
ENSG00000133816.17	11.2525	7.91635	0.74066	10.6882	1.15547e-26	5.22517e-25
ENSG00000278624.2	64.9099	10.6897	1.00227	10.6655	1.47667e-26	6.6588e-25
ENSG00000137563.13	56.3572	9.15559	0.859225	10.6556	1.64117e-26	7.37973e-25
ENSG00000118804.8	16.4382	8.75063	0.821362	10.6538	1.67389e-26	7.50568e-25
ENSG00000107789.16	55.6281	3.75854	0.353166	10.6424	1.89149e-26	8.45767e-25
ENSG00000169397.3	25.6368	9.27226	0.871864	10.635	2.04854e-26	9.1343e-25
ENSG00000145349.17	43.1038	-4.74647	0.446398	-10.6328	2.09699e-26	9.32432e-25
ENSG00000136732.16	28.706	5.40339	0.508409	10.628	2.20702e-26	9.7863e-25
ENSG00000111339.12	13.7389	8.45613	0.795792	10.6261	2.25438e-26	9.96861e-25
ENSG00000170779.11	18.2281	4.75611	0.448253	10.6103	2.66846e-26	1.1767e-24
ENSG00000163421.9	14.7448	8.5571	0.807308	10.5995	2.99446e-26	1.31682e-24
ENSG00000087586.18	23.0381	6.23407	0.588283	10.5971	3.07455e-26	1.34833e-24
ENSG00000151725.12	113.594	5.00396	0.472387	10.5929	3.21385e-26	1.40555e-24
ENSG00000189057.11	37.0538	-5.03877	0.476211	-10.581	3.65147e-26	1.59258e-24
ENSG00000205726.15	9.21555	6.79573	0.64231	10.5801	3.68388e-26	1.60234e-24
ENSG00000122861.16	23.9959	8.65223	0.817832	10.5795	3.7103e-26	1.60944e-24
ENSG00000185201.16	56.2218	5.18177	0.490345	10.5676	4.21128e-26	1.82181e-24
ENSG00000122952.17	20.6571	4.53128	0.428811	10.5671	4.23436e-26	1.82684e-24
ENSG00000152689.18	67.8468	-3.7275	0.353609	-10.5413	5.57133e-26	2.39717e-24
ENSG00000124813.23	3.86227	6.49513	0.616214	10.5404	5.62702e-26	2.41463e-24
ENSG00000088826.18	35.9979	9.77513	0.927434	10.54	5.65107e-26	2.41845e-24
ENSG00000143479.17	10.3167	6.88111	0.653241	10.5338	6.03562e-26	2.57611e-24
ENSG00000168685.15	76.5435	7.06444	0.670878	10.5301	6.27476e-26	2.67104e-24
ENSG00000059728.11	33.1169	3.80996	0.361897	10.5278	6.43478e-26	2.73001e-24
ENSG00000274580.4	74.4122	10.7966	1.02556	10.5276	6.44749e-26	2.73001e-24
ENSG00000285501.2	6.5467	-5.33288	0.506803	-10.5226	6.79719e-26	2.87046e-24
ENSG00000182885.17	106.004	11.2154	1.06636	10.5175	7.17398e-26	3.02159e-24
ENSG00000006576.16	37.8675	-2.78594	0.264892	-10.5173	7.19294e-26	3.0216e-24
ENSG00000122644.13	74.5869	3.61578	0.344035	10.5099	7.77795e-26	3.2514e-24
ENSG00000134627.12	19.8461	6.25918	0.595553	10.5099	7.7807e-26	3.2514e-24
ENSG00000163736.4	55.6559	9.93879	0.946153	10.5044	8.24272e-26	3.43547e-24
ENSG00000197705.10	16.2019	-6.23071	0.593422	-10.4996	8.67167e-26	3.60484e-24
ENSG00000197321.15	4.71206	6.88445	0.655729	10.4989	8.73802e-26	3.62299e-24
ENSG00000118515.11	90.0533	5.75815	0.549091	10.4867	9.94491e-26	4.11271e-24
ENSG00000053900.11	49.4943	-1.85697	0.177239	-10.4772	1.09976e-25	4.53628e-24
ENSG00000129173.13	20.9784	7.40996	0.707499	10.4735	1.14393e-25	4.70631e-24
ENSG00000142657.21	130.565	3.83354	0.366094	10.4715	1.16813e-25	4.79355e-24
ENSG00000163512.14	49.453	1.55699	0.148745	10.4675	1.21865e-25	4.98802e-24
ENSG00000168078.10	12.9997	7.85337	0.750689	10.4615	1.29717e-25	5.29582e-24
ENSG00000165480.16	12.9721	6.21318	0.594008	10.4598	1.32184e-25	5.38278e-24
ENSG00000080986.13	46.0188	3.99262	0.381745	10.4589	1.33443e-25	5.42024e-24
ENSG00000162896.6	24.8036	-7.86838	0.752507	-10.4562	1.37224e-25	5.55964e-24
ENSG00000122694.16	28.2357	5.54707	0.530621	10.4539	1.40608e-25	5.68234e-24
ENSG00000196549.12	75.0108	6.81489	0.652501	10.4443	1.55665e-25	6.27494e-24
ENSG00000153317.15	16.2874	4.11899	0.394402	10.4437	1.56668e-25	6.29949e-24
ENSG00000136689.19	52.5016	10.4217	0.999044	10.4317	1.77667e-25	7.12586e-24
ENSG00000147905.18	65.6639	-2.93934	0.281956	-10.4248	1.91009e-25	7.64178e-24
TR_locus_3	7.3183	-5.9737	0.573567	-10.415	2.11788e-25	8.45193e-24
ENSG00000117155.17	20.9522	3.34796	0.322222	10.3903	2.74629e-25	1.09324e-23
ENSG00000075420.13	8.38691	5.62953	0.542564	10.3758	3.19555e-25	1.26892e-23
ENSG00000117322.18	125.666	-5.43284	0.524013	-10.3678	3.4757e-25	1.37674e-23
ENSG00000006740.17	21.4343	-7.72932	0.745685	-10.3654	3.56299e-25	1.40782e-23
ENSG00000168081.9	5.06558	-4.81058	0.464299	-10.361	3.73207e-25	1.47099e-23
ENSG00000164032.12	106.7	5.71747	0.552463	10.3491	4.22651e-25	1.66177e-23
ENSG00000105810.10	10.5665	5.29348	0.512117	10.3365	4.82001e-25	1.89046e-23
ENSG00000170962.13	48.4988	-5.87437	0.568829	-10.3271	5.31196e-25	2.0783e-23
ENSG00000119535.18	22.4188	9.06641	0.87803	10.3259	5.38381e-25	2.10126e-23
ENSG00000154839.10	10.4271	6.15334	0.597184	10.3039	6.76434e-25	2.63364e-23
ENSG00000158825.6	6.95514	7.47818	0.725902	10.3019	6.90728e-25	2.68275e-23
ENSG00000070540.13	8.55585	4.35735	0.423181	10.2967	7.29514e-25	2.82651e-23
ENSG00000125538.12	26.2571	7.58203	0.736426	10.2957	7.36701e-25	2.84745e-23
ENSG00000174607.11	16.7222	-4.74726	0.461278	-10.2915	7.69488e-25	2.96699e-23
ENSG00000136810.13	26.8827	7.45545	0.724451	10.2912	7.72246e-25	2.97045e-23
ENSG00000198223.17	2.15673	5.89297	0.574165	10.2635	1.02856e-24	3.94685e-23
ENSG00000186652.10	12.038	8.22423	0.801718	10.2583	1.0865e-24	4.15917e-23
ENSG00000052795.13	4.59588	6.22547	0.607174	10.2532	1.145e-24	4.37266e-23
PB_novel_01936	10.4167	7.58344	0.739937	10.2488	1.19866e-24	4.56664e-23
ENSG00000076554.15	52.9563	-2.90827	0.283908	-10.2437	1.26292e-24	4.80001e-23
ENSG00000181631.7	36.6548	7.24868	0.708831	10.2263	1.51254e-24	5.73509e-23
ENSG00000196139.14	10.5111	8.08156	0.790499	10.2234	1.55851e-24	5.89538e-23
ENSG00000204136.11	8.43994	7.76248	0.760052	10.2131	1.73247e-24	6.53791e-23
ENSG00000101928.13	38.2742	2.69562	0.263986	10.2112	1.76655e-24	6.6508e-23
ENSG00000090889.12	41.9446	7.06788	0.694114	10.1826	2.37157e-24	8.90763e-23
ENSG00000165923.16	6.50354	-5.08164	0.499261	-10.1783	2.47821e-24	9.28629e-23
ENSG00000150337.13	7.90292	7.45099	0.732182	10.1764	2.52707e-24	9.44722e-23
ENSG00000153898.13	37.0666	-4.45534	0.437952	-10.1731	2.61369e-24	9.7482e-23
ENSG00000151458.12	4.62428	6.47631	0.636829	10.1696	2.70946e-24	1.00819e-22
ENSG00000106772.18	9.73996	7.00033	0.68878	10.1634	2.88885e-24	1.07243e-22
ENSG00000093009.11	18.9295	6.44581	0.634268	10.1626	2.9121e-24	1.07856e-22
ENSG00000134057.15	30.9661	5.43537	0.534898	10.1615	2.94463e-24	1.08808e-22
ENSG00000125868.16	43.5321	3.99462	0.393374	10.1548	3.15591e-24	1.16346e-22
ENSG00000120798.17	58.1793	-2.04081	0.201076	-10.1495	3.33191e-24	1.22551e-22
ENSG00000111726.13	27.0636	3.03603	0.299154	10.1487	3.35708e-24	1.22791e-22
ENSG00000165650.12	48.1118	6.13078	0.604101	10.1486	3.36149e-24	1.22791e-22
ENSG00000125148.7	13.2842	7.32522	0.721787	10.1487	3.35684e-24	1.22791e-22
ENSG00000256235.2	5.8043	7.10474	0.700419	10.1436	3.53962e-24	1.29002e-22
ENSG00000174371.17	59.2956	3.8899	0.383802	10.1352	3.8561e-24	1.40216e-22
ENSG00000152270.9	5.70163	6.30613	0.622392	10.1321	3.98069e-24	1.44418e-22
ENSG00000066279.18	5.58985	6.13982	0.606359	10.1257	4.24869e-24	1.53791e-22
ENSG00000091436.17	19.4575	4.76826	0.471086	10.1218	4.42024e-24	1.59639e-22
ENSG00000166851.15	21.1136	8.20056	0.811477	10.1057	5.21118e-24	1.87779e-22
ENSG00000102265.12	9.89715	6.19251	0.613327	10.0966	5.7199e-24	2.05646e-22
ENSG00000104093.14	4.27366	6.50582	0.644386	10.0962	5.74532e-24	2.06096e-22
ENSG00000153071.15	11.2756	7.31972	0.725812	10.0849	6.44504e-24	2.30678e-22
ENSG00000175305.17	9.52877	4.83896	0.479972	10.0818	6.65214e-24	2.37557e-22
ENSG00000170956.17	8.68166	7.81599	0.775508	10.0785	6.87385e-24	2.44927e-22
ENSG00000139173.10	6.69042	-3.17494	0.315181	-10.0734	7.24319e-24	2.571e-22
ENSG00000136631.15	36.362	-2.05551	0.204054	-10.0733	7.2477e-24	2.571e-22
ENSG00000126262.5	7.02655	7.55832	0.751042	10.0638	7.98749e-24	2.82715e-22
ENSG00000262634.5	10.6387	6.03648	0.600171	10.0579	8.47479e-24	2.99299e-22
ENSG00000139679.15	25.9378	8.04027	0.799486	10.0568	8.57428e-24	3.02144e-22
ENSG00000140379.9	119.42	7.02346	0.698532	10.0546	8.76756e-24	3.08274e-22
ENSG00000163563.8	651.429	6.91938	0.6883	10.0529	8.92464e-24	3.13108e-22
ENSG00000111880.16	90.7753	-3.05444	0.304199	-10.041	1.00696e-23	3.52502e-22
ENSG00000235621.9	15.3454	-6.60942	0.660205	-10.0112	1.36136e-23	4.75521e-22
ENSG00000277804.4	35.4072	9.86339	0.985934	10.0041	1.46204e-23	5.09575e-22
ENSG00000285318.2	74.8006	10.9165	1.09129	10.0034	1.47287e-23	5.1223e-22
ENSG00000119655.11	37.9055	4.62254	0.462278	9.99948	1.53198e-23	5.31632e-22
ENSG00000229474.7	27.7183	-4.06823	0.407917	-9.97318	1.99725e-23	6.91586e-22
ENSG00000121064.13	29.0369	3.46278	0.347749	9.95769	2.33422e-23	8.06519e-22
ENSG00000092853.14	17.1196	5.73587	0.576375	9.95163	2.48079e-23	8.5531e-22
ENSG00000004809.14	8.95058	7.69602	0.773432	9.95049	2.50943e-23	8.6332e-22
ENSG00000170458.14	21.4162	9.1458	0.919703	9.9443	2.67034e-23	9.16702e-22
ENSG00000126790.12	22.5153	-4.46305	0.449022	-9.93948	2.80289e-23	9.60142e-22
ENSG00000174837.15	12.443	7.79281	0.784404	9.93468	2.94128e-23	1.00539e-21
ENSG00000136982.6	14.3124	4.83279	0.486809	9.92748	3.16144e-23	1.07833e-21
ENSG00000178999.13	6.51562	6.11653	0.616714	9.91794	3.47854e-23	1.18396e-21
ENSG00000188321.13	45.1864	-2.57599	0.259958	-9.90922	3.79606e-23	1.28929e-21
ENSG00000126759.14	11.1793	7.90856	0.798394	9.90559	3.93639e-23	1.33411e-21
ENSG00000163754.18	43.9112	3.11806	0.314789	9.90524	3.95022e-23	1.33596e-21
ENSG00000101439.9	6.23139	7.14614	0.721652	9.90247	4.06103e-23	1.37053e-21
ENSG00000284903.2	140.478	11.8157	1.19474	9.88981	4.60908e-23	1.55221e-21
ENSG00000127423.11	2.98938	5.65186	0.571589	9.88798	4.694e-23	1.57748e-21
ENSG00000131747.15	67.2721	4.61174	0.466748	9.88057	5.05458e-23	1.69509e-21
ENSG00000142089.16	10.511	7.87918	0.797588	9.87876	5.14653e-23	1.72231e-21
PB_novel_07846	13.1238	-5.31402	0.53797	-9.8779	5.19069e-23	1.73345e-21
ENSG00000010610.10	80.0752	10.5102	1.0642	9.87616	5.28202e-23	1.76027e-21
PB_novel_20420	3.56216	-5.08626	0.51506	-9.87509	5.33862e-23	1.77543e-21
ENSG00000172965.17	12.1894	6.68003	0.677244	9.86356	5.98896e-23	1.98756e-21
ENSG00000111247.15	41.4253	4.25753	0.431967	9.85614	6.44792e-23	2.13544e-21
ENSG00000163312.11	22.5868	-2.24993	0.228302	-9.85505	6.51873e-23	2.15442e-21
ENSG00000124731.13	21.1783	7.30148	0.741931	9.84119	7.48231e-23	2.46777e-21
ENSG00000144848.11	36.775	1.76018	0.178926	9.83745	7.76521e-23	2.55579e-21
ENSG00000146410.12	8.87273	5.48039	0.557223	9.83518	7.94282e-23	2.60887e-21
PB_novel_20761	33.7538	-7.79375	0.792711	-9.83177	8.21632e-23	2.69316e-21
ENSG00000187621.15	13.8997	-5.37288	0.546589	-9.82984	8.37501e-23	2.73956e-21
ENSG00000109099.16	4.55129	6.3091	0.641906	9.8287	8.47021e-23	2.76503e-21
ENSG00000112365.5	15.7378	-2.06704	0.210333	-9.82747	8.57493e-23	2.7935e-21
ENSG00000123610.5	49.1078	9.87384	1.00484	9.82629	8.67591e-23	2.82064e-21
ENSG00000142945.13	70.5736	4.69614	0.478269	9.81904	9.32237e-23	3.02466e-21
ENSG00000133069.17	166.031	11.3537	1.15693	9.81369	9.83039e-23	3.18301e-21
ENSG00000157500.12	55.0954	-2.21817	0.226197	-9.80636	1.05717e-22	3.41611e-21
ENSG00000025039.15	6.14268	6.18491	0.630821	9.80454	1.07631e-22	3.47094e-21
ENSG00000198947.16	9.82676	-5.80963	0.592974	-9.79744	1.15476e-22	3.71641e-21
ENSG00000136867.11	6.02482	6.48377	0.662344	9.78912	1.25386e-22	4.02724e-21
ENSG00000166405.15	9.80837	-4.30656	0.440048	-9.78657	1.28579e-22	4.12149e-21
ENSG00000112685.14	49.9855	-1.9382	0.198155	-9.78121	1.35576e-22	4.33706e-21
ENSG00000151948.12	13.7504	8.35036	0.854142	9.77632	1.42295e-22	4.54292e-21
ENSG00000144283.22	4.84823	6.20778	0.635279	9.77174	1.48867e-22	4.74323e-21
ENSG00000171791.14	11.9717	-3.52834	0.361176	-9.76902	1.52918e-22	4.86262e-21
ENSG00000165819.12	120.633	-2.63704	0.270034	-9.76558	1.58205e-22	5.02073e-21
ENSG00000127980.16	46.2091	-2.74031	0.280781	-9.7596	1.67813e-22	5.31508e-21
ENSG00000162711.18	17.469	8.78096	0.900183	9.75464	1.76233e-22	5.57072e-21
ENSG00000183918.17	7.1741	7.51679	0.770697	9.75324	1.78674e-22	5.6367e-21
ENSG00000078399.19	4.24518	6.54573	0.671671	9.74544	1.92944e-22	6.07487e-21
ENSG00000166927.13	18.5636	4.24434	0.435685	9.74176	2.00055e-22	6.28636e-21
ENSG00000100300.18	21.2757	5.07762	0.522228	9.723	2.40594e-22	7.54538e-21
ENSG00000237638.2	4.33637	-4.12429	0.42424	-9.7216	2.43925e-22	7.63484e-21
ENSG00000005471.19	14.039	-4.20305	0.43265	-9.71468	2.61069e-22	8.15546e-21
ENSG00000113070.8	21.5523	8.48507	0.873831	9.7102	2.72805e-22	8.50545e-21
ENSG00000135363.12	5.79933	6.71129	0.691394	9.7069	2.81781e-22	8.76818e-21
ENSG00000085840.13	53.9755	6.49473	0.66913	9.70623	2.83622e-22	8.80829e-21
ENSG00000163464.8	9.6385	7.84371	0.808437	9.70231	2.94735e-22	9.13563e-21
ENSG00000145220.14	23.4414	3.70836	0.382297	9.70021	3.00882e-22	9.3081e-21
ENSG00000103202.13	6.95953	6.14469	0.633741	9.6959	3.13855e-22	9.69066e-21
ENSG00000137462.9	67.9966	5.64552	0.582475	9.6923	3.25137e-22	1.00196e-20
ENSG00000013583.10	5.68684	5.67309	0.585457	9.69002	3.32472e-22	1.02259e-20
ENSG00000163599.17	63.6572	-7.68542	0.793357	-9.68721	3.41739e-22	1.04907e-20
ENSG00000163661.4	31.9192	7.99706	0.825685	9.68537	3.47959e-22	1.06612e-20
ENSG00000178852.16	5.09255	-3.19274	0.329929	-9.67704	3.77474e-22	1.15433e-20
ENSG00000118513.19	89.4341	4.66581	0.482396	9.67215	3.95952e-22	1.20852e-20
ENSG00000167900.12	10.5483	6.34572	0.65634	9.66834	4.10999e-22	1.25206e-20
ENSG00000169891.18	4.04035	6.21163	0.643006	9.6603	4.4455e-22	1.35169e-20
ENSG00000163492.15	4.58205	-4.8219	0.499414	-9.65512	4.67611e-22	1.4191e-20
ENSG00000112367.12	88.7203	-2.75702	0.285656	-9.65153	4.84275e-22	1.46496e-20
ENSG00000136404.16	4.33151	6.23414	0.645932	9.65139	4.84933e-22	1.46496e-20
ENSG00000152760.10	5.0061	6.87007	0.71183	9.65128	4.85476e-22	1.46496e-20
ENSG00000137502.10	37.1973	-3.98197	0.412634	-9.65012	4.90959e-22	1.47871e-20
ENSG00000148834.13	27.1223	3.20085	0.331725	9.6491	4.95889e-22	1.49075e-20
ENSG00000120594.17	8.35739	6.71591	0.696034	9.64882	4.9724e-22	1.492e-20
ENSG00000091490.11	62.9932	-4.51113	0.467547	-9.6485	4.98808e-22	1.4939e-20
ENSG00000224137.1	13.2654	-4.9026	0.508174	-9.64748	5.0379e-22	1.50599e-20
ENSG00000175538.11	3.34276	6.3526	0.658512	9.6469	5.06634e-22	1.51166e-20
ENSG00000164821.5	75.6482	10.914	1.13157	9.645	5.16097e-22	1.53702e-20
ENSG00000160746.13	33.7066	3.67969	0.382168	9.62847	6.06262e-22	1.80219e-20
ENSG00000140694.17	35.4987	-2.09422	0.217592	-9.62449	6.30192e-22	1.86984e-20
ENSG00000134333.14	104.157	2.46035	0.255826	9.6173	6.75795e-22	2.00143e-20
ENSG00000170365.10	19.4992	5.78594	0.601804	9.61433	6.95626e-22	2.05635e-20
ENSG00000172331.12	60.2292	3.84765	0.400282	9.61235	7.09145e-22	2.09244e-20
ENSG00000179909.15	8.41142	-2.95074	0.30705	-9.60995	7.25817e-22	2.13374e-20
ENSG00000118985.16	28.9988	3.73412	0.388563	9.61005	7.25114e-22	2.13374e-20
ENSG00000153044.10	10.1631	3.17828	0.330748	9.60937	7.29926e-22	2.14188e-20
ENSG00000196550.10	9.61563	5.64481	0.587777	9.60366	7.71556e-22	2.25988e-20
ENSG00000019991.18	4.18376	6.57032	0.684403	9.60006	7.98968e-22	2.33588e-20
ENSG00000114450.11	8.90006	4.23515	0.441549	9.59159	8.67401e-22	2.53132e-20
ENSG00000008438.5	22.3064	9.19277	0.959205	9.58374	9.35898e-22	2.72623e-20
ENSG00000135069.14	50.6033	5.16074	0.538577	9.58218	9.50155e-22	2.76272e-20
ENSG00000128886.12	29.6646	-5.02475	0.524938	-9.5721	1.04759e-21	3.04048e-20
ENSG00000100526.20	16.8285	8.30512	0.868485	9.56276	1.14659e-21	3.3218e-20
ENSG00000100479.13	14.8316	4.89808	0.512379	9.55949	1.18334e-21	3.41737e-20
ENSG00000139734.19	20.9183	6.29194	0.65819	9.55945	1.18387e-21	3.41737e-20
ENSG00000175893.12	10.9378	-3.27502	0.342677	-9.55717	1.21015e-21	3.48694e-20
ENSG00000116030.17	88.3385	5.1088	0.534832	9.55216	1.27021e-21	3.65341e-20
PB_novel_08557	6.61981	-5.48706	0.57455	-9.5502	1.2945e-21	3.71657e-20
ENSG00000167815.12	16.973	4.58219	0.479992	9.54637	1.34317e-21	3.84937e-20
ENSG00000183495.14	18.2098	-3.33798	0.349853	-9.5411	1.41321e-21	4.04285e-20
ENSG00000237440.9	25.5104	-3.77711	0.396057	-9.53676	1.47359e-21	4.20802e-20
ENSG00000127507.18	14.0253	9.48471	0.994943	9.53292	1.52918e-21	4.35899e-20
ENSG00000189190.10	26.3342	-2.39344	0.251101	-9.53181	1.54564e-21	4.39806e-20
ENSG00000197956.10	71.3432	5.67657	0.595713	9.52903	1.58756e-21	4.5093e-20
ENSG00000174099.12	4.98969	6.88999	0.723097	9.52845	1.5965e-21	4.52662e-20
ENSG00000196415.10	36.6279	9.91164	1.04031	9.5276	1.6096e-21	4.55569e-20
ENSG00000181315.11	16.5741	-3.02959	0.318082	-9.52456	1.65743e-21	4.68275e-20
ENSG00000271736.2	4.60775	6.80895	0.715077	9.52199	1.69901e-21	4.79175e-20
ENSG00000186074.19	4.90968	7.04219	0.739854	9.51835	1.75947e-21	4.95351e-20
ENSG00000181751.10	25.647	3.05705	0.32139	9.51195	1.87118e-21	5.25875e-20
ENSG00000268555.2	5.00031	7.02972	0.739199	9.50991	1.90819e-21	5.35332e-20
ENSG00000137965.11	45.2427	4.80663	0.505868	9.50175	2.06397e-21	5.7802e-20
ENSG00000184226.15	12.773	-5.73707	0.604134	-9.49636	2.17348e-21	6.07623e-20
ENSG00000236287.8	151.792	-2.20374	0.232132	-9.49347	2.23462e-21	6.23623e-20
ENSG00000114698.15	10.4507	8.02949	0.845831	9.49302	2.24443e-21	6.25269e-20
ENSG00000184792.16	12.629	7.92681	0.835293	9.48985	2.31358e-21	6.43408e-20
ENSG00000138587.6	11.2763	7.62037	0.80336	9.48562	2.40937e-21	6.68884e-20
ENSG00000100721.11	43.1399	-5.66978	0.597756	-9.4851	2.42142e-21	6.71062e-20
ENSG00000224597.10	4.69443	5.08943	0.536822	9.48067	2.52662e-21	6.99002e-20
ENSG00000157551.19	5.60298	7.21941	0.761949	9.47493	2.66929e-21	7.37195e-20
ENSG00000145354.12	62.9676	3.52606	0.372168	9.47437	2.68383e-21	7.39932e-20
ENSG00000141179.14	21.1005	3.43147	0.362202	9.47393	2.69513e-21	7.41766e-20
ENSG00000029725.17	62.8702	-2.65113	0.279898	-9.47175	2.75189e-21	7.56083e-20
ENSG00000180871.8	15.2414	8.62039	0.910578	9.46694	2.88155e-21	7.90347e-20
ENSG00000121742.19	9.72878	7.97662	0.843285	9.45899	3.10935e-21	8.51363e-20
ENSG00000288299.1	105.137	2.54336	0.269023	9.45404	3.25986e-21	8.91048e-20
ENSG00000120885.22	10.8771	8.13725	0.860893	9.4521	3.32095e-21	9.06193e-20
ENSG00000165030.4	11.1287	7.64233	0.808836	9.44855	3.43541e-21	9.35827e-20
ENSG00000198736.12	9.82897	4.51353	0.477844	9.44562	3.53319e-21	9.60824e-20
ENSG00000160856.21	132.519	-5.71292	0.604904	-9.44435	3.57626e-21	9.70881e-20
ENSG00000073737.17	5.02121	6.67529	0.707059	9.44092	3.69511e-21	1.00144e-19
ENSG00000171766.17	29.2941	-3.58333	0.379661	-9.43824	3.79105e-21	1.0257e-19
ENSG00000132640.15	11.0246	6.73946	0.714459	9.43297	3.98651e-21	1.07676e-19
ENSG00000068885.15	23.2436	-2.26763	0.24045	-9.43081	4.06946e-21	1.09731e-19
ENSG00000162772.17	38.3685	6.89926	0.731911	9.42636	4.24575e-21	1.14292e-19
ENSG00000183032.12	9.77828	7.42231	0.787485	9.42532	4.28779e-21	1.15229e-19
ENSG00000109881.17	12.4459	3.481	0.369816	9.41279	4.83152e-21	1.29623e-19
ENSG00000197721.17	7.10887	6.97632	0.741388	9.40982	4.97009e-21	1.33117e-19
ENSG00000011600.12	17.6248	5.9971	0.637397	9.40873	5.02144e-21	1.34267e-19
ENSG00000162367.11	17.8053	8.28694	0.88117	9.40447	5.22934e-21	1.39592e-19
ENSG00000111716.14	117.694	4.92279	0.523594	9.40192	5.35738e-21	1.42771e-19
ENSG00000138778.13	10.7871	5.9419	0.632013	9.40154	5.37696e-21	1.43054e-19
ENSG00000105281.12	80.9153	10.8976	1.1593	9.40018	5.44706e-21	1.44678e-19
ENSG00000206560.11	42.1924	4.4718	0.475979	9.39494	5.72487e-21	1.51804e-19
ENSG00000213625.9	59.3647	2.43616	0.259771	9.37811	6.71685e-21	1.77813e-19
ENSG00000181704.12	15.0168	2.95018	0.314848	9.37019	7.24054e-21	1.91359e-19
ENSG00000049323.16	3.32798	6.26268	0.668478	9.36856	7.35294e-21	1.94008e-19
ENSG00000121621.7	35.5908	3.23685	0.345663	9.36417	7.66472e-21	2.01901e-19
ENSG00000140526.18	10.1008	3.17594	0.339189	9.36333	7.72625e-21	2.03186e-19
ENSG00000170522.10	25.1173	6.00695	0.641799	9.35955	8.00799e-21	2.10249e-19
ENSG00000205208.5	19.8097	2.16716	0.231564	9.3588	8.06476e-21	2.11207e-19
ENSG00000140030.6	64.8335	4.27083	0.456348	9.35872	8.07092e-21	2.11207e-19
ENSG00000135905.20	22.8858	-3.05654	0.326863	-9.35115	8.67032e-21	2.26521e-19
ENSG00000185946.16	40.9414	-2.30932	0.247049	-9.34761	8.9648e-21	2.33832e-19
ENSG00000021355.13	241.274	2.33273	0.249625	9.34494	9.19383e-21	2.39414e-19
ENSG00000213347.10	7.66335	7.4002	0.79276	9.33472	1.01255e-20	2.63246e-19
ENSG00000181061.14	95.8069	5.34223	0.572488	9.3316	1.0428e-20	2.70671e-19
ENSG00000178425.14	32.8189	-2.32035	0.248761	-9.32762	1.08273e-20	2.80579e-19
ENSG00000163931.16	67.8437	5.73979	0.615464	9.32596	1.09988e-20	2.84561e-19
ENSG00000138069.18	135.115	1.83986	0.197341	9.32326	1.12822e-20	2.91421e-19
ENSG00000158470.5	9.68198	6.31656	0.677949	9.31716	1.195e-20	3.0817e-19
ENSG00000204936.10	84.5862	11.0887	1.19148	9.3067	1.31863e-20	3.39503e-19
ENSG00000198851.10	7.59938	7.49642	0.806653	9.29324	1.49655e-20	3.84693e-19
ENSG00000162722.9	74.1969	8.14668	0.876943	9.28986	1.54489e-20	3.96481e-19
ENSG00000166707.12	3.90249	-4.57577	0.492605	-9.28893	1.55848e-20	3.99326e-19
ENSG00000196247.11	45.9889	-2.83705	0.305489	-9.28691	1.58829e-20	4.06312e-19
ENSG00000102804.15	11.9195	3.70709	0.39971	9.27445	1.78538e-20	4.55273e-19
ENSG00000123219.13	44.9995	4.98213	0.537189	9.27445	1.78539e-20	4.55273e-19
ENSG00000258216.7	4.66975	-4.15804	0.448428	-9.27248	1.81874e-20	4.63038e-19
ENSG00000134802.18	64.6173	4.40832	0.475487	9.27118	1.84098e-20	4.67955e-19
ENSG00000106615.10	17.0861	3.01494	0.325414	9.26493	1.95199e-20	4.95384e-19
ENSG00000169403.12	30.1026	7.58074	0.818481	9.26196	2.00705e-20	5.08548e-19
ENSG00000122986.14	25.6489	-4.19694	0.453362	-9.25738	2.09504e-20	5.30002e-19
ENSG00000288243.1	11.3543	6.71022	0.725107	9.25411	2.16024e-20	5.45632e-19
ENSG00000116711.10	3.39186	6.40743	0.692873	9.24763	2.29532e-20	5.78833e-19
ENSG00000151012.13	4.17633	5.86547	0.634329	9.24673	2.31455e-20	5.82763e-19
ENSG00000138592.14	81.6091	-2.07027	0.223925	-9.24536	2.34443e-20	5.89357e-19
ENSG00000150782.12	17.657	6.54261	0.708325	9.23674	2.54115e-20	6.37804e-19
ENSG00000276371.2	106.385	-2.62091	0.283794	-9.23524	2.57714e-20	6.45824e-19
ENSG00000115977.20	4.26362	5.42446	0.587755	9.22911	2.72899e-20	6.82804e-19
ENSG00000198874.13	41.9202	-1.92772	0.208922	-9.22696	2.78415e-20	6.95514e-19
ENSG00000175063.17	6.55639	7.18032	0.778276	9.22593	2.81111e-20	7.01154e-19
ENSG00000187266.14	26.0442	7.40352	0.802795	9.22218	2.91121e-20	7.24986e-19
ENSG00000145649.8	19.8404	8.93491	0.969209	9.21876	3.00564e-20	7.47336e-19
ENSG00000163568.15	49.4953	-4.67479	0.507156	-9.21765	3.0367e-20	7.53885e-19
ENSG00000168264.10	34.3834	4.06374	0.44089	9.21713	3.05172e-20	7.55522e-19
ENSG00000180817.12	58.987	5.88431	0.638413	9.21709	3.05276e-20	7.55522e-19
ENSG00000281649.2	89.683	-2.95625	0.321014	-9.20909	3.28912e-20	8.1276e-19
ENSG00000274829.4	36.0935	-2.07001	0.224862	-9.20569	3.39486e-20	8.3759e-19
ENSG00000159496.14	6.1977	7.14556	0.776545	9.20172	3.52255e-20	8.67754e-19
ENSG00000146670.10	24.4194	7.4239	0.806952	9.19993	3.58183e-20	8.80997e-19
ENSG00000029534.21	37.4773	4.66523	0.507474	9.19305	3.81845e-20	9.37752e-19
ENSG00000164879.7	16.963	7.80881	0.849713	9.18994	3.93073e-20	9.63843e-19
ENSG00000133318.14	459.69	3.28357	0.35749	9.18507	4.11245e-20	1.00686e-18
ENSG00000150540.14	7.81705	7.58186	0.825942	9.17965	4.32475e-20	1.05721e-18
ENSG00000169439.12	27.9182	9.3128	1.01461	9.17867	4.36431e-20	1.06525e-18
ENSG00000136842.14	92.2858	4.82402	0.525625	9.17769	4.40451e-20	1.07342e-18
ENSG00000134243.12	10.5623	7.26007	0.791183	9.17622	4.46487e-20	1.08647e-18
ENSG00000008869.12	13.7629	-3.06206	0.334012	-9.1675	4.84134e-20	1.1745e-18
ENSG00000100321.15	2.52137	5.92468	0.646269	9.16751	4.84052e-20	1.1745e-18
ENSG00000100906.11	222.859	4.51455	0.492605	9.16464	4.97147e-20	1.20424e-18
ENSG00000168026.18	9.06664	-4.68134	0.511408	-9.15383	5.49504e-20	1.32905e-18
ENSG00000132842.14	133.229	-2.08524	0.227806	-9.15359	5.50725e-20	1.32999e-18
ENSG00000134690.11	22.4944	5.14747	0.562983	9.14321	6.0626e-20	1.46189e-18
ENSG00000163029.16	143.906	-2.37534	0.26005	-9.13417	6.59083e-20	1.58687e-18
ENSG00000183688.4	23.2643	9.10432	0.997175	9.13011	6.84305e-20	1.64511e-18
ENSG00000159840.16	37.5475	9.33314	1.02258	9.12701	7.04153e-20	1.69029e-18
ENSG00000108848.16	439.322	-2.24563	0.246083	-9.12552	7.1395e-20	1.71123e-18
ENSG00000162692.12	12.6857	8.19577	0.898274	9.12391	7.24618e-20	1.73419e-18
ENSG00000137575.12	309.225	3.1722	0.347788	9.12107	7.43842e-20	1.77754e-18
ENSG00000131669.10	13.4003	8.10482	0.888935	9.11745	7.69131e-20	1.83522e-18
ENSG00000172115.9	302.906	4.73653	0.519659	9.11468	7.89001e-20	1.87982e-18
ENSG00000237513.2	13.0829	-3.67146	0.4029	-9.1126	8.0434e-20	1.91351e-18
ENSG00000188610.12	9.49691	5.09475	0.559254	9.1099	8.24583e-20	1.95875e-18
ENSG00000171552.14	95.1895	8.37983	0.920355	9.105	8.62658e-20	2.04615e-18
ENSG00000151746.15	21.2258	-3.83245	0.421088	-9.10132	8.9242e-20	2.1136e-18
ENSG00000004700.16	117.972	-2.14794	0.236143	-9.09592	9.37922e-20	2.21808e-18
ENSG00000048028.11	48.1774	-3.72465	0.409526	-9.09504	9.45524e-20	2.23275e-18
ENSG00000114209.15	185.557	5.73218	0.630525	9.09111	9.80292e-20	2.31143e-18
ENSG00000243317.8	75.3743	3.66189	0.402806	9.09094	9.81873e-20	2.31175e-18
ENSG00000130560.9	16.84	3.86972	0.425717	9.08988	9.9148e-20	2.33093e-18
ENSG00000145730.20	13.02	5.54321	0.610582	9.07857	1.10016e-19	2.58262e-18
ENSG00000007237.19	9.95303	7.91311	0.871892	9.07579	1.1286e-19	2.64549e-18
ENSG00000274536.7	19.3821	6.58667	0.725989	9.07268	1.16127e-19	2.71808e-18
ENSG00000187010.21	10.1703	7.86427	0.867311	9.06742	1.21867e-19	2.84825e-18
ENSG00000124491.16	24.5686	6.78506	0.749796	9.04921	1.44006e-19	3.36077e-18
ENSG00000126970.16	7.93073	-3.14305	0.34739	-9.04762	1.46122e-19	3.40517e-18
ENSG00000277909.4	5.68387	6.49279	0.718023	9.04259	1.53001e-19	3.56027e-18
ENSG00000167996.16	694.651	3.31277	0.366405	9.04128	1.54847e-19	3.598e-18
ENSG00000143158.11	19.615	2.17001	0.240183	9.03485	1.64227e-19	3.81039e-18
ENSG00000118508.5	4.63671	6.03937	0.668572	9.03323	1.66683e-19	3.86177e-18
ENSG00000132646.11	252.272	3.17747	0.351833	9.03118	1.69824e-19	3.92885e-18
ENSG00000061918.14	3.56183	5.9634	0.660373	9.03035	1.71123e-19	3.95317e-18
ENSG00000184613.11	9.45979	7.90244	0.875394	9.02729	1.75974e-19	4.05935e-18
ENSG00000270164.1	10.9209	-4.805	0.53238	-9.02551	1.78867e-19	4.12015e-18
ENSG00000242616.4	44.7144	4.90641	0.544559	9.00989	2.06256e-19	4.73735e-18
ENSG00000197993.9	8.90096	7.65571	0.84969	9.01	2.06055e-19	4.73735e-18
ENSG00000101447.15	4.09345	5.65267	0.62769	9.00551	2.14674e-19	4.92362e-18
ENSG00000174446.13	12.0011	-1.93427	0.214912	-9.0003	2.25099e-19	5.15532e-18
ENSG00000174021.11	51.897	4.48636	0.498499	8.99975	2.26235e-19	5.16652e-18
ENSG00000134986.14	22.7066	5.0622	0.562474	8.99988	2.25959e-19	5.16652e-18
ENSG00000065923.10	9.45639	-3.85944	0.428894	-8.99859	2.28644e-19	5.21405e-18
ENSG00000113263.13	7.26715	7.41173	0.823866	8.99628	2.33486e-19	5.31687e-18
ENSG00000125124.13	30.9663	-2.9407	0.326948	-8.9944	2.37521e-19	5.40107e-18
ENSG00000166265.13	3.28601	6.45942	0.71819	8.99402	2.38349e-19	5.41218e-18
ENSG00000069966.19	32.9481	-3.46136	0.385076	-8.98875	2.50047e-19	5.66975e-18
ENSG00000146386.8	49.8976	6.43989	0.716552	8.98733	2.53311e-19	5.73562e-18
ENSG00000153132.13	5.24002	6.07718	0.676346	8.98531	2.58013e-19	5.83381e-18
ENSG00000172243.18	23.2791	7.2689	0.809126	8.98365	2.61929e-19	5.91397e-18
ENSG00000122223.13	6.33379	6.39008	0.712612	8.96712	3.0436e-19	6.86228e-18
ENSG00000102362.15	5.41828	6.59981	0.736206	8.96462	3.11343e-19	7.00983e-18
ENSG00000117984.15	121.254	8.28632	0.924735	8.96075	3.22491e-19	7.2506e-18
ENSG00000123609.11	114.119	4.77412	0.533129	8.95491	3.40027e-19	7.63411e-18
ENSG00000171681.12	68.269	-1.95504	0.218356	-8.95343	3.44597e-19	7.72585e-18
ENSG00000049192.15	2.64896	-4.19783	0.468885	-8.9528	3.46583e-19	7.75947e-18
ENSG00000067182.8	31.924	6.21491	0.694475	8.94907	3.58499e-19	8.01501e-18
ENSG00000009790.15	61.251	-2.15595	0.240928	-8.94851	3.60309e-19	8.03298e-18
ENSG00000123080.12	14.2807	4.67318	0.522224	8.94861	3.59986e-19	8.03298e-18
ENSG00000112759.19	42.7707	4.42209	0.494296	8.94624	3.67807e-19	8.1887e-18
ENSG00000070371.16	6.5205	6.69702	0.74879	8.94379	3.76063e-19	8.36084e-18
ENSG00000165704.15	38.7679	3.6897	0.412628	8.94197	3.82298e-19	8.48766e-18
ENSG00000002745.13	8.50246	-5.31274	0.59415	-8.94175	3.83051e-19	8.49256e-18
ENSG00000205269.6	7.69217	7.13722	0.798327	8.94021	3.88416e-19	8.59956e-18
ENSG00000013306.16	61.3225	5.67579	0.635076	8.93718	3.99229e-19	8.82673e-18
ENSG00000137210.14	26.6513	3.52461	0.394396	8.93673	4.00854e-19	8.85038e-18
ENSG00000069974.16	271.857	3.0856	0.345647	8.92703	4.3761e-19	9.64858e-18
ENSG00000197063.11	11.1279	7.56662	0.847781	8.9252	4.44887e-19	9.79548e-18
ENSG00000285443.2	38.0322	9.64254	1.0808	8.92165	4.59403e-19	1.01012e-17
ENSG00000108219.15	32.6622	6.24379	0.700001	8.91969	4.67583e-19	1.02567e-17
ENSG00000142347.19	43.342	7.04384	0.789699	8.91965	4.67762e-19	1.02567e-17
ENSG00000043093.15	24.8375	2.78591	0.312621	8.91145	5.03716e-19	1.10299e-17
ENSG00000036549.13	36.331	-1.7699	0.198614	-8.91129	5.04443e-19	1.10307e-17
ENSG00000198223.17_PAR_Y	2.16989	5.91781	0.664456	8.90625	5.27884e-19	1.15275e-17
ENSG00000255240.6	6.27431	-3.95142	0.443681	-8.90599	5.29138e-19	1.15391e-17
ENSG00000075426.12	12.63	7.57052	0.850545	8.90079	5.54505e-19	1.20758e-17
ENSG00000100749.8	122.15	4.83539	0.543279	8.90037	5.56615e-19	1.21052e-17
ENSG00000167536.14	13.1442	5.42253	0.609288	8.89978	5.59579e-19	1.21531e-17
ENSG00000145416.13	81.3918	-3.80154	0.427924	-8.88368	6.46839e-19	1.40292e-17
ENSG00000143228.13	33.623	4.20581	0.473477	8.88281	6.51921e-19	1.41202e-17
ENSG00000237438.7	5.1721	-4.69311	0.528396	-8.8818	6.57857e-19	1.42295e-17
ENSG00000139146.14	108.264	-2.6264	0.295808	-8.87871	6.76394e-19	1.46107e-17
ENSG00000163803.13	7.13613	6.53637	0.73621	8.87841	6.78252e-19	1.4631e-17
ENSG00000162174.12	5.93732	6.44716	0.726304	8.87667	6.88919e-19	1.4841e-17
PB_novel_19247	9.39274	-6.33332	0.714014	-8.87003	7.31271e-19	1.57322e-17
ENSG00000048392.12	51.8647	-2.16758	0.24448	-8.86606	7.57821e-19	1.62814e-17
ENSG00000215784.6	6.29061	5.36754	0.605421	8.86579	7.59607e-19	1.62979e-17
ENSG00000101017.14	7.84907	-3.74851	0.422956	-8.86266	7.81305e-19	1.67409e-17
ENSG00000116815.16	53.8776	4.29355	0.484605	8.85988	8.00972e-19	1.71393e-17
ENSG00000159216.19	38.294	4.37117	0.493483	8.85778	8.16253e-19	1.74429e-17
ENSG00000138821.13	83.9752	2.7307	0.308363	8.85548	8.33217e-19	1.77579e-17
ENSG00000205542.11	1529.78	4.73484	0.534672	8.8556	8.32326e-19	1.77579e-17
ENSG00000168288.13	109.76	3.31963	0.375052	8.85114	8.66337e-19	1.84391e-17
ENSG00000287092.1	8.75998	-5.12629	0.57942	-8.84728	8.96808e-19	1.90369e-17
ENSG00000205056.8	9.42629	-4.77717	0.539954	-8.84737	8.9605e-19	1.90369e-17
ENSG00000261611.6	11.9954	-4.51606	0.510825	-8.84072	9.5105e-19	2.01615e-17
ENSG00000179639.10	16.1608	8.5847	0.971103	8.84015	9.55859e-19	2.02366e-17
ENSG00000116717.13	7.609	4.93653	0.558607	8.83722	9.81268e-19	2.0747e-17
ENSG00000120910.15	42.37	-2.36288	0.267461	-8.83447	1.00572e-18	2.12359e-17
ENSG00000179869.15	3.61692	6.4352	0.728646	8.83172	1.03076e-18	2.17357e-17
ENSG00000173914.12	11.0179	-2.33642	0.2647	-8.82667	1.07839e-18	2.27102e-17
ENSG00000115594.12	2.6822	6.06243	0.687121	8.82295	1.11483e-18	2.34467e-17
ENSG00000141480.18	43.9657	3.64182	0.412794	8.82237	1.12062e-18	2.35375e-17
ENSG00000105383.15	5.63866	6.68941	0.75826	8.82205	1.12387e-18	2.35746e-17
ENSG00000077152.11	26.1245	7.99741	0.906623	8.82109	1.13351e-18	2.37457e-17
ENSG00000185418.16	20.1028	-2.30753	0.261742	-8.81607	1.18545e-18	2.48011e-17
ENSG00000184500.16	11.2858	6.28037	0.712645	8.81277	1.22095e-18	2.55105e-17
ENSG00000142556.19	31.9272	-2.57159	0.291927	-8.80901	1.26255e-18	2.63453e-17
ENSG00000131446.17	89.091	6.5513	0.74379	8.808	1.27398e-18	2.6549e-17
ENSG00000186106.11	10.5915	-2.13998	0.243119	-8.80218	1.34186e-18	2.79271e-17
ENSG00000102145.15	14.1992	7.91949	0.899762	8.80176	1.34685e-18	2.79944e-17
ENSG00000173660.12	67.1699	5.4647	0.620924	8.80092	1.35701e-18	2.81691e-17
ENSG00000198856.13	47.531	5.88778	0.669036	8.8004	1.36325e-18	2.82618e-17
ENSG00000112312.10	31.9328	5.55109	0.631095	8.79597	1.41822e-18	2.93633e-17
ENSG00000102554.14	6.32667	4.71249	0.535921	8.79327	1.45273e-18	3.00387e-17
ENSG00000133119.13	60.385	2.68883	0.305849	8.79135	1.47778e-18	3.05172e-17
ENSG00000111913.20	306.741	-3.02817	0.344716	-8.78455	1.56995e-18	3.23787e-17
ENSG00000115944.15	36.7431	4.0311	0.45919	8.77871	1.65365e-18	3.4061e-17
ENSG00000163041.13	226.019	3.39094	0.386372	8.77637	1.68835e-18	3.47309e-17
ENSG00000004866.22	10.4975	2.79367	0.318573	8.7693	1.79777e-18	3.69341e-17
ENSG00000133740.11	7.18547	-4.3067	0.49125	-8.76682	1.83788e-18	3.77095e-17
ENSG00000116001.17	139.592	-1.8731	0.213703	-8.765	1.86781e-18	3.82745e-17
ENSG00000159082.18	4.66576	3.50304	0.399723	8.76367	1.88992e-18	3.86779e-17
ENSG00000235162.9	5.68548	6.05749	0.691262	8.76294	1.90222e-18	3.88798e-17
ENSG00000186529.16	7.93788	7.59403	0.866745	8.76155	1.92585e-18	3.93125e-17
ENSG00000137876.11	275.146	4.23009	0.482841	8.76083	1.93812e-18	3.95124e-17
ENSG00000101084.18	24.3466	2.3868	0.272565	8.75681	2.00855e-18	4.0844e-17
ENSG00000003436.16	13.7765	7.35229	0.839603	8.75687	2.00753e-18	4.0844e-17
ENSG00000124098.10	137.441	4.24352	0.484656	8.75573	2.02781e-18	4.11308e-17
ENSG00000250722.6	5.94376	7.21357	0.823861	8.7558	2.02654e-18	4.11308e-17
ENSG00000222041.11	11.5848	5.86467	0.670396	8.74807	2.17034e-18	4.39659e-17
ENSG00000119900.9	8.42483	3.38237	0.386924	8.74169	2.29649e-18	4.64036e-17
ENSG00000106069.23	5.00998	6.63145	0.758597	8.74174	2.29555e-18	4.64036e-17
ENSG00000185885.16	12.3681	4.5715	0.522998	8.74095	2.31151e-18	4.66481e-17
ENSG00000204271.13	6.39073	-4.98772	0.57063	-8.74073	2.31604e-18	4.66805e-17
ENSG00000138678.11	24.2511	5.5313	0.632936	8.73911	2.34951e-18	4.72953e-17
ENSG00000106780.9	6.31559	4.84467	0.554411	8.73841	2.36405e-18	4.75282e-17
ENSG00000089335.21	23.8071	-1.87615	0.214721	-8.73762	2.38074e-18	4.78035e-17
ENSG00000076003.5	247.289	2.78564	0.319139	8.72859	2.57878e-18	5.17149e-17
ENSG00000134242.16	155.583	-1.9501	0.223425	-8.7282	2.58752e-18	5.18251e-17
ENSG00000078124.12	12.2701	2.38316	0.273254	8.72139	2.74809e-18	5.49721e-17
ENSG00000131981.16	6.44543	6.68213	0.766354	8.71938	2.79737e-18	5.58878e-17
ENSG00000198730.9	89.9361	-1.69598	0.194566	-8.71674	2.86317e-18	5.70597e-17
ENSG00000177879.17	30.2379	4.05687	0.465409	8.71678	2.86221e-18	5.70597e-17
ENSG00000127954.13	5.06313	7.05093	0.80932	8.71217	2.98114e-18	5.93366e-17
ENSG00000198168.9	21.938	3.91462	0.4494	8.71076	3.01835e-18	6.00024e-17
ENSG00000151687.14	5.23687	-2.94859	0.338732	-8.70478	3.18184e-18	6.31738e-17
ENSG00000071539.14	12.5785	4.34822	0.499607	8.70328	3.22435e-18	6.39382e-17
PB_novel_01035	3.49345	6.11611	0.702778	8.70276	3.23914e-18	6.41519e-17
ENSG00000167283.8	43.322	5.50294	0.632653	8.6982	3.372e-18	6.67004e-17
ENSG00000137193.14	93.7273	7.37568	0.848325	8.6944	3.48658e-18	6.88815e-17
ENSG00000143742.14	370.224	4.89923	0.563512	8.6941	3.49582e-18	6.89787e-17
ENSG00000152056.17	6.98293	-2.87983	0.331495	-8.68738	3.7088e-18	7.30909e-17
ENSG00000223482.8	24.3972	2.11833	0.24399	8.68207	3.88639e-18	7.64963e-17
ENSG00000112419.14	7.43639	3.95208	0.45528	8.68054	3.93898e-18	7.74359e-17
ENSG00000242685.7	9.95241	-3.92778	0.452851	-8.67346	4.19167e-18	8.23021e-17
ENSG00000113648.16	98.4419	2.26218	0.26088	8.67133	4.27105e-18	8.37576e-17
ENSG00000131462.8	8.28418	4.09361	0.472107	8.67092	4.28644e-18	8.39564e-17
ENSG00000137801.11	15.8474	8.67678	1.0007	8.67074	4.29325e-18	8.39868e-17
ENSG00000198538.11	22.6197	-2.63253	0.30364	-8.66989	4.32549e-18	8.45138e-17
ENSG00000119865.9	3.70452	6.24439	0.720317	8.66895	4.36123e-18	8.51079e-17
ENSG00000154582.17	21.467	4.54437	0.524364	8.66644	4.45839e-18	8.68978e-17
ENSG00000184182.19	15.9518	2.21617	0.255789	8.66407	4.55226e-18	8.86191e-17
ENSG00000170345.10	178.653	4.8822	0.563707	8.66088	4.68139e-18	9.1022e-17
ENSG00000121316.11	158.122	4.3346	0.500533	8.65997	4.71904e-18	9.16424e-17
ENSG00000176340.4	21.0159	3.31664	0.383426	8.65002	5.14922e-18	9.98748e-17
ENSG00000158402.20	4.21329	5.5406	0.640645	8.64847	5.21939e-18	1.01113e-16
ENSG00000065833.9	5.1957	5.16932	0.597791	8.64737	5.26979e-18	1.01966e-16
ENSG00000196188.12	8.00052	6.67022	0.771907	8.64121	5.562e-18	1.07489e-16
ENSG00000213246.7	21.3488	2.25448	0.261022	8.63714	5.76384e-18	1.11255e-16
ENSG00000149150.9	30.6689	6.59469	0.763751	8.63461	5.89296e-18	1.1361e-16
ENSG00000239941.1	5.48899	-3.38237	0.391753	-8.63393	5.92785e-18	1.14145e-16
ENSG00000198876.13	92.2444	5.73764	0.664913	8.62916	6.18042e-18	1.18865e-16
ENSG00000119888.11	14.8541	8.39519	0.973617	8.62268	6.54047e-18	1.25639e-16
ENSG00000146592.17	3.7557	6.46323	0.74964	8.62178	6.59206e-18	1.26477e-16
ENSG00000239463.7	9.59246	-3.82559	0.443866	-8.6188	6.76593e-18	1.29657e-16
ENSG00000176160.11	9.67109	-4.57855	0.532212	-8.60287	7.77473e-18	1.48811e-16
ENSG00000283979.1	23.736	9.20689	1.07052	8.60041	7.94346e-18	1.51858e-16
ENSG00000172543.8	5.03205	6.62126	0.770025	8.59876	8.05842e-18	1.53871e-16
ENSG00000122176.12	22.7036	-7.21959	0.839636	-8.59847	8.07849e-18	1.5407e-16
ENSG00000118777.12	14.9542	6.84139	0.795784	8.59705	8.17938e-18	1.55808e-16
ENSG00000124882.4	17.7692	7.59665	0.884009	8.59341	8.44281e-18	1.60635e-16
ENSG00000163710.9	5.65765	7.12441	0.829387	8.58996	8.69984e-18	1.65328e-16
ENSG00000242361.7	9.26737	-3.8628	0.44987	-8.58648	8.96765e-18	1.70215e-16
ENSG00000267040.6	7.41178	-2.97268	0.346322	-8.58359	9.19589e-18	1.7434e-16
ENSG00000139508.15	21.9116	-2.2924	0.267161	-8.5806	9.43821e-18	1.78656e-16
ENSG00000277377.4	22.9923	9.24703	1.07768	8.5805	9.44594e-18	1.78656e-16
ENSG00000140284.11	15.637	5.41867	0.631576	8.57961	9.5199e-18	1.79842e-16
ENSG00000229314.5	11.6201	8.25439	0.962468	8.57628	9.79931e-18	1.84901e-16
ENSG00000079974.18	10.4581	-2.18807	0.255322	-8.56983	1.03635e-17	1.95316e-16
ENSG00000071082.11	358.293	5.44404	0.635673	8.56422	1.08814e-17	2.04834e-16
ENSG00000138380.18	8.5937	-3.02881	0.353911	-8.55812	1.14721e-17	2.15699e-16
ENSG00000154114.12	8.28861	3.4859	0.407385	8.55676	1.16083e-17	2.18005e-16
ENSG00000134539.17	9.46057	7.70873	0.901864	8.54755	1.25728e-17	2.3584e-16
ENSG00000075218.19	19.8395	7.6558	0.895942	8.54497	1.28565e-17	2.40878e-16
ENSG00000188229.6	85.3677	4.19999	0.491533	8.54467	1.289e-17	2.41223e-16
ENSG00000163606.11	11.7278	4.24658	0.497156	8.54175	1.32207e-17	2.47122e-16
ENSG00000224610.1	6.05182	-5.5342	0.647984	-8.54065	1.33474e-17	2.49198e-16
ENSG00000081041.9	7.89965	7.52858	0.882026	8.53555	1.3949e-17	2.60127e-16
ENSG00000145675.15	43.2931	3.59088	0.421211	8.52513	1.52638e-17	2.84313e-16
ENSG00000106588.12	72.9008	5.2556	0.616654	8.52277	1.55786e-17	2.89837e-16
ENSG00000180537.13	8.20295	6.45284	0.757439	8.51929	1.60535e-17	2.98325e-16
ENSG00000007312.13	18.8032	-4.12266	0.48394	-8.51895	1.61002e-17	2.98846e-16
ENSG00000173715.18	5.23353	-3.42322	0.401934	-8.51685	1.63947e-17	3.0396e-16
ENSG00000182141.10	13.2108	-2.26778	0.266337	-8.5147	1.67024e-17	3.09305e-16
ENSG00000091164.13	40.65	2.78425	0.32703	8.51372	1.68441e-17	3.11567e-16
ENSG00000128699.14	131.323	-2.10277	0.247138	-8.50852	1.76172e-17	3.2549e-16
ENSG00000103381.12	27.4673	2.80525	0.329722	8.50791	1.7709e-17	3.26808e-16
ENSG00000142583.18	30.6629	5.90803	0.694646	8.50509	1.81447e-17	3.34462e-16
ENSG00000203880.12	77.3993	-1.86344	0.219125	-8.50402	1.83143e-17	3.37199e-16
ENSG00000116209.12	85.7434	2.76917	0.325841	8.49852	1.92028e-17	3.53149e-16
ENSG00000117009.12	15.2367	-3.31968	0.390681	-8.49717	1.94268e-17	3.56859e-16
ENSG00000205639.12	12.1951	7.85636	0.924931	8.49399	1.9966e-17	3.66343e-16
ENSG00000116679.16	357.805	2.59745	0.305806	8.49378	2.00023e-17	3.66585e-16
ENSG00000140403.12	54.9859	4.75197	0.559876	8.48754	2.11053e-17	3.86358e-16
ENSG00000179088.15	7.13616	-4.6882	0.552524	-8.48506	2.15616e-17	3.94259e-16
ENSG00000006534.16	26.2269	9.16528	1.0805	8.48244	2.20525e-17	4.02774e-16
ENSG00000014257.16	4.2676	5.85698	0.691064	8.47529	2.34485e-17	4.27781e-16
ENSG00000167264.18	17.8685	-1.81285	0.214032	-8.46999	2.45408e-17	4.47197e-16
ENSG00000101220.18	7.91561	5.97228	0.706001	8.4593	2.68987e-17	4.89605e-16
ENSG00000105339.11	9.4685	7.02476	0.830541	8.45805	2.71886e-17	4.94319e-16
ENSG00000198848.13	22.3519	9.20368	1.09065	8.43868	3.20947e-17	5.82854e-16
ENSG00000109436.8	8.70866	-5.54655	0.657983	-8.42963	3.46768e-17	6.28178e-16
ENSG00000140374.16	44.7282	2.87633	0.341221	8.42952	3.47086e-17	6.28178e-16
ENSG00000177674.16	10.9814	4.30764	0.511008	8.42968	3.46609e-17	6.28178e-16
ENSG00000116729.14	12.1553	8.25579	0.98017	8.42282	3.67544e-17	6.64452e-16
ENSG00000111670.16	22.2387	-3.00064	0.356644	-8.41352	3.97884e-17	7.18488e-16
ENSG00000261040.7	4.85537	-4.97873	0.592062	-8.40913	4.13075e-17	7.45075e-16
ENSG00000081181.8	8.97303	7.20734	0.857233	8.40768	4.18204e-17	7.53475e-16
ENSG00000112531.17	12.5987	2.35044	0.279607	8.40623	4.23406e-17	7.61987e-16
PB_novel_36063	5.01151	6.72686	0.800833	8.39983	4.47136e-17	8.03788e-16
ENSG00000140090.18	2.77496	6.20002	0.738418	8.39635	4.60556e-17	8.2698e-16
ENSG00000103876.13	5.87826	4.62612	0.551002	8.39583	4.62602e-17	8.2821e-16
ENSG00000057294.15	5.2266	6.98629	0.832119	8.39578	4.62797e-17	8.2821e-16
ENSG00000136630.13	31.2294	9.38452	1.11773	8.39603	4.61817e-17	8.2821e-16
ENSG00000255398.3	28.4985	8.7861	1.04676	8.39358	4.71575e-17	8.42973e-16
ENSG00000105472.13	4.627	6.77518	0.80761	8.38917	4.89567e-17	8.74157e-16
ENSG00000178338.11	9.77002	-2.25308	0.268682	-8.38564	5.04487e-17	8.99791e-16
ENSG00000162739.14	101.181	-4.44018	0.529795	-8.38093	5.25096e-17	9.35504e-16
ENSG00000228474.6	62.7103	5.79332	0.691522	8.37763	5.40021e-17	9.6102e-16
ENSG00000151692.15	3.10624	5.79585	0.691835	8.3775	5.40631e-17	9.61034e-16
ENSG00000100387.9	48.7464	5.47061	0.65309	8.3765	5.45229e-17	9.6813e-16
ENSG00000100003.18	3.14756	6.27266	0.748929	8.37551	5.49841e-17	9.75234e-16
ENSG00000182117.6	32.8317	6.5123	0.777757	8.37318	5.60846e-17	9.93649e-16
ENSG00000125037.12	22.1518	3.21973	0.384682	8.36986	5.76877e-17	1.02092e-15
PB_novel_20476	5.92156	-5.7878	0.691611	-8.36858	5.83156e-17	1.03089e-15
ENSG00000167081.18	20.3572	-2.28175	0.272665	-8.36831	5.84494e-17	1.03211e-15
ENSG00000198105.15	7.4892	-3.23179	0.386444	-8.36289	6.11977e-17	1.07945e-15
ENSG00000152492.15	19.1928	-2.18521	0.261369	-8.36066	6.23709e-17	1.09893e-15
ENSG00000184939.16	21.2267	-2.82704	0.338388	-8.35443	6.57485e-17	1.1561e-15
ENSG00000056050.7	34.3408	7.20949	0.862957	8.35441	6.57609e-17	1.1561e-15
ENSG00000235655.3	141.338	3.82097	0.457792	8.34652	7.03021e-17	1.23458e-15
ENSG00000198959.12	23.7754	8.71235	1.04402	8.345	7.12153e-17	1.24924e-15
ENSG00000116675.16	9.4833	6.446	0.772682	8.34238	7.28111e-17	1.27583e-15
ENSG00000198521.12	25.7717	-1.8425	0.220882	-8.34153	7.33329e-17	1.28357e-15
ENSG00000147124.12	13.8859	-2.96625	0.355825	-8.33625	7.66821e-17	1.34072e-15
ENSG00000136014.12	7.76821	-4.46396	0.535507	-8.33594	7.68827e-17	1.34276e-15
ENSG00000081665.14	33.4921	-2.02393	0.242806	-8.33557	7.71282e-17	1.3441e-15
ENSG00000167553.16	76.2637	3.16435	0.379619	8.33559	7.71136e-17	1.3441e-15
ENSG00000163755.9	86.1722	-2.2617	0.27135	-8.33498	7.75143e-17	1.34936e-15
ENSG00000198898.14	207.714	2.87309	0.345081	8.32584	8.37362e-17	1.45608e-15
ENSG00000181826.10	10.0148	5.64886	0.67862	8.32405	8.50088e-17	1.4766e-15
ENSG00000048052.22	43.4356	-3.45692	0.415754	-8.31482	9.18937e-17	1.59446e-15
ENSG00000144655.15	126.677	7.83512	0.942446	8.3136	9.28441e-17	1.6092e-15
ENSG00000068489.13	9.55923	5.26163	0.63323	8.30921	9.63445e-17	1.66806e-15
ENSG00000046651.15	95.3253	-2.62309	0.315804	-8.30608	9.89158e-17	1.71072e-15
ENSG00000196268.12	14.4375	-2.33924	0.281669	-8.30493	9.98784e-17	1.7255e-15
ENSG00000240583.13	19.6891	8.80827	1.06084	8.3031	1.01427e-16	1.75035e-15
ENSG00000122641.11	4.75583	6.74797	0.81362	8.29376	1.09726e-16	1.89153e-15
ENSG00000097033.14	48.1093	1.51726	0.183058	8.28841	1.14777e-16	1.97647e-15
ENSG00000168385.18	204.088	-1.644	0.198475	-8.28314	1.19965e-16	2.06359e-15
ENSG00000154723.12	39.267	5.5196	0.666384	8.28291	1.20206e-16	2.0655e-15
ENSG00000170385.10	19.563	4.67611	0.564639	8.28159	1.21546e-16	2.08404e-15
PB_novel_03266	4.24101	5.83561	0.70464	8.28168	1.21447e-16	2.08404e-15
ENSG00000265380.1	5.73888	-5.83108	0.704869	-8.27258	1.31093e-16	2.24531e-15
ENSG00000123975.5	26.7977	5.41141	0.65439	8.2694	1.34634e-16	2.3035e-15
ENSG00000115233.12	47.8216	3.23706	0.39152	8.26792	1.36317e-16	2.3298e-15
ENSG00000198574.6	3.48223	5.99187	0.724914	8.26563	1.38959e-16	2.37241e-15
ENSG00000183696.14	8.02631	6.16977	0.746561	8.26426	1.40565e-16	2.39726e-15
ENSG00000213782.7	87.9088	-1.69525	0.205166	-8.26281	1.4228e-16	2.42393e-15
ENSG00000082293.13	4.45321	-3.95123	0.478274	-8.26144	1.43924e-16	2.44932e-15
ENSG00000241343.10	198.552	5.45636	0.660605	8.25964	1.46115e-16	2.48396e-15
ENSG00000116824.5	5.2146	6.05288	0.732855	8.25931	1.46511e-16	2.48804e-15
ENSG00000123595.8	16.1376	2.72838	0.33036	8.25879	1.4716e-16	2.4964e-15
ENSG00000177663.14	19.5761	6.16544	0.746844	8.25532	1.51496e-16	2.56722e-15
ENSG00000182782.8	8.86135	7.82634	0.948314	8.2529	1.54603e-16	2.6171e-15
PB_novel_18980	18.6691	-5.4036	0.654911	-8.25089	1.57224e-16	2.65865e-15
ENSG00000108582.12	8.66698	4.72347	0.572496	8.25065	1.57536e-16	2.6611e-15
ENSG00000196730.13	4.59375	6.52823	0.791258	8.25044	1.57807e-16	2.66287e-15
ENSG00000272917.1	4.80755	-5.04617	0.611744	-8.24882	1.59971e-16	2.69653e-15
ENSG00000165672.7	56.9408	3.6465	0.442548	8.23978	1.72525e-16	2.90509e-15
ENSG00000143942.5	6.31464	6.34689	0.770798	8.23418	1.80798e-16	3.04119e-15
ENSG00000060140.9	1.85926	5.44542	0.661706	8.22937	1.88202e-16	3.16239e-15
ENSG00000165168.8	140.791	4.78466	0.581684	8.22553	1.94324e-16	3.26182e-15
ENSG00000139318.8	215.66	5.19484	0.632336	8.21531	2.11611e-16	3.54827e-15
ENSG00000149292.17	14.9867	-2.41382	0.293958	-8.21146	2.18521e-16	3.66028e-15
ENSG00000049449.10	9.22537	2.70128	0.329178	8.20614	2.2842e-16	3.82208e-15
ENSG00000114738.11	41.0879	4.97937	0.606925	8.20426	2.32014e-16	3.87815e-15
ENSG00000244398.1	83.5189	6.10236	0.7439	8.2032	2.34073e-16	3.90848e-15
ENSG00000069869.16	17.0137	4.37511	0.533489	8.20094	2.38509e-16	3.97839e-15
ENSG00000184588.18	552.888	-3.51896	0.429199	-8.19891	2.42579e-16	4.04206e-15
PB_novel_49851	7.20014	7.50485	0.915574	8.19688	2.46706e-16	4.10653e-15
ENSG00000136250.12	71.701	5.01028	0.61166	8.19129	2.58434e-16	4.2928e-15
ENSG00000164120.14	16.286	7.41391	0.905095	8.1913	2.58418e-16	4.2928e-15
ENSG00000112232.10	3.87036	-4.51152	0.550824	-8.1905	2.60133e-16	4.31654e-15
ENSG00000167088.11	67.2467	4.27106	0.521644	8.18768	2.66301e-16	4.4143e-15
ENSG00000197223.12	62.2069	4.56489	0.557724	8.18486	2.72621e-16	4.51436e-15
ENSG00000122507.21	12.7443	-2.57914	0.315422	-8.17679	2.91507e-16	4.8221e-15
ENSG00000243719.7	9.49619	-3.64318	0.44568	-8.17443	2.97268e-16	4.91231e-15
ENSG00000122547.11	7.19776	7.42318	0.908281	8.17279	3.01348e-16	4.97457e-15
ENSG00000138326.21	1230.19	4.95698	0.60681	8.16892	3.11169e-16	5.13139e-15
ENSG00000116260.17	45.9972	6.95604	0.851606	8.16814	3.13172e-16	5.15909e-15
ENSG00000186231.17	3.33712	-3.89757	0.47729	-8.16604	3.18686e-16	5.24451e-15
ENSG00000065618.21	8.8141	7.77445	0.952407	8.16295	3.26942e-16	5.37485e-15
ENSG00000149485.19	36.0001	5.08838	0.623788	8.15723	3.42802e-16	5.62978e-15
ENSG00000163867.17	33.4435	-1.72685	0.211965	-8.14686	3.73499e-16	6.12222e-15
ENSG00000138738.11	2.557	6.02473	0.739528	8.14672	3.73938e-16	6.12222e-15
ENSG00000203747.12	24.1993	6.18276	0.758918	8.14682	3.73629e-16	6.12222e-15
ENSG00000086289.12	9.44882	5.5462	0.681199	8.14183	3.89344e-16	6.36793e-15
ENSG00000168374.11	47.8538	1.97021	0.241993	8.1416	3.90101e-16	6.37377e-15
ENSG00000253250.3	7.68278	5.23344	0.643294	8.13538	4.10634e-16	6.7024e-15
ENSG00000125356.7	42.7858	5.46762	0.672123	8.13485	4.12449e-16	6.72516e-15
PB_novel_50056	6.89994	7.37786	0.907384	8.13091	4.26088e-16	6.94045e-15
PB_novel_19424	4.11491	-5.29369	0.651176	-8.12943	4.31299e-16	7.01817e-15
ENSG00000109689.18	13.6793	-2.26436	0.278585	-8.12807	4.36177e-16	7.09031e-15
ENSG00000139572.4	3.18719	6.44856	0.793504	8.1267	4.4115e-16	7.16386e-15
ENSG00000118689.15	11.0735	4.74635	0.584441	8.12118	4.61664e-16	7.48938e-15
ENSG00000179262.10	32.925	4.1775	0.514404	8.12105	4.62168e-16	7.48994e-15
ENSG00000165646.14	3.94141	5.53239	0.681355	8.11968	4.67403e-16	7.56709e-15
ENSG00000284254.3	27.7678	-3.32005	0.408944	-8.11858	4.71656e-16	7.62821e-15
ENSG00000124107.5	11.8345	8.07208	0.995047	8.11226	4.96884e-16	8.02809e-15
ENSG00000187098.17	5.30485	5.83746	0.719866	8.10909	5.0999e-16	8.23152e-15
ENSG00000255197.6	9.23718	6.73253	0.830818	8.1035	5.33997e-16	8.6103e-15
ENSG00000129810.15	12.1255	2.65098	0.32718	8.10252	5.38325e-16	8.67132e-15
ENSG00000169019.11	78.8368	4.34601	0.536445	8.1015	5.42842e-16	8.73526e-15
ENSG00000111206.13	8.37986	6.63913	0.820362	8.09292	5.82493e-16	9.36388e-15
ENSG00000115657.14	21.7838	5.6675	0.700409	8.09171	5.8834e-16	9.44836e-15
ENSG00000152240.13	34.4569	5.18207	0.640433	8.09152	5.89271e-16	9.4538e-15
ENSG00000164919.11	77.6601	4.74383	0.586737	8.08511	6.21068e-16	9.95393e-15
ENSG00000196209.13	12.0511	8.23267	1.01896	8.07948	6.50428e-16	1.0414e-14
ENSG00000123473.16	30.7488	4.0008	0.495237	8.07856	6.5538e-16	1.04828e-14
ENSG00000173915.16	35.9589	6.1422	0.760372	8.07788	6.59002e-16	1.05269e-14
ENSG00000008517.18	4.13772	6.64151	0.822192	8.0778	6.59458e-16	1.05269e-14
ENSG00000162385.11	11.9379	3.20173	0.396664	8.07165	6.93569e-16	1.10604e-14
ENSG00000173535.15	3.76005	6.64412	0.823563	8.06753	7.1733e-16	1.14279e-14
ENSG00000115128.7	31.5002	5.28701	0.655449	8.06625	7.24897e-16	1.15369e-14
ENSG00000185986.12	5.4861	-3.67656	0.455893	-8.06452	7.35225e-16	1.16896e-14
ENSG00000152229.18	74.184	3.76672	0.467147	8.06324	7.42969e-16	1.1801e-14
ENSG00000107779.14	11.9586	-4.46017	0.553161	-8.06305	7.44167e-16	1.18083e-14
ENSG00000110079.18	3.85412	6.17557	0.766619	8.05559	7.90951e-16	1.25382e-14
ENSG00000140307.11	44.6014	4.68655	0.581794	8.05534	7.92577e-16	1.25515e-14
ENSG00000173020.11	20.0311	6.31263	0.783919	8.05265	8.10188e-16	1.28177e-14
ENSG00000163739.5	4.12911	6.79483	0.844208	8.04877	8.36304e-16	1.3212e-14
ENSG00000149091.15	15.1439	8.08788	1.00487	8.0487	8.3677e-16	1.3212e-14
ENSG00000161298.18	5.29686	-2.91634	0.362383	-8.04768	8.43791e-16	1.33097e-14
ENSG00000152455.16	15.1378	3.94961	0.490802	8.04725	8.46759e-16	1.33434e-14
ENSG00000100427.16	11.1216	8.10108	1.00681	8.04629	8.53431e-16	1.34352e-14
ENSG00000167380.16	25.7558	-2.27387	0.282656	-8.04464	8.64999e-16	1.36039e-14
ENSG00000153563.16	14.1178	8.40708	1.04595	8.03771	9.15348e-16	1.43816e-14
ENSG00000232884.9	5.07512	-4.02209	0.50056	-8.03518	9.34443e-16	1.46672e-14
ENSG00000111371.16	209.756	-2.89648	0.360613	-8.03209	9.58249e-16	1.50261e-14
ENSG00000067066.17	239.502	-1.50434	0.187394	-8.02767	9.93434e-16	1.55625e-14
ENSG00000047346.12	16.6994	-2.48702	0.309889	-8.02553	1.01088e-15	1.58203e-14
ENSG00000179604.10	19.6975	8.95085	1.11544	8.02451	1.0193e-15	1.59364e-14
ENSG00000204852.16	5.75767	-3.32719	0.414746	-8.02223	1.03842e-15	1.62194e-14
ENSG00000143933.19	345.053	4.43841	0.5533	8.0217	1.04288e-15	1.62732e-14
ENSG00000268471.6	5.27956	-2.70097	0.336721	-8.02138	1.04562e-15	1.63001e-14
ENSG00000144320.14	19.6388	2.25775	0.281533	8.0195	1.06174e-15	1.65352e-14
ENSG00000141293.16	14.2993	-2.87097	0.358045	-8.01846	1.07076e-15	1.66593e-14
ENSG00000160255.18	471.126	7.84523	0.97853	8.01736	1.08045e-15	1.67938e-14
ENSG00000250850.2	2.71347	-4.25732	0.531113	-8.01585	1.09381e-15	1.69849e-14
ENSG00000139722.7	12.2218	6.4707	0.807277	8.01547	1.0972e-15	1.7021e-14
ENSG00000115523.17	8.52283	7.23851	0.903838	8.00863	1.15995e-15	1.7977e-14
ENSG00000135655.16	148.579	1.52806	0.190991	8.0007	1.23714e-15	1.91547e-14
ENSG00000095380.11	10.229	2.77878	0.347325	8.00053	1.23888e-15	1.9163e-14
ENSG00000148737.17	6.12722	5.42584	0.678259	7.99966	1.24762e-15	1.92795e-14
PB_novel_03762	15.3395	-2.32641	0.29083	-7.9992	1.25227e-15	1.93327e-14
ENSG00000172216.6	12.2373	7.55547	0.944627	7.99837	1.26079e-15	1.94454e-14
ENSG00000158156.9	6.41129	6.21682	0.77742	7.99673	1.27768e-15	1.96869e-14
ENSG00000188690.15	17.7317	2.22547	0.278436	7.99274	1.31971e-15	2.03149e-14
ENSG00000125740.14	21.3614	8.63933	1.08164	7.98724	1.37991e-15	2.1221e-14
ENSG00000185480.12	24.9492	3.26263	0.408568	7.98553	1.39922e-15	2.14973e-14
ENSG00000138160.7	111.071	3.28815	0.411948	7.98194	1.44049e-15	2.20895e-14
ENSG00000095303.17	8.62779	6.16698	0.772617	7.98194	1.44053e-15	2.20895e-14
ENSG00000100941.9	257.905	-1.45605	0.182467	-7.97983	1.46535e-15	2.24486e-14
ENSG00000156531.17	49.5081	-2.23066	0.279574	-7.97878	1.47781e-15	2.26093e-14
ENSG00000181467.5	7.53416	6.5109	0.816034	7.97871	1.47867e-15	2.26093e-14
ENSG00000143321.19	8.66027	3.87749	0.485988	7.97858	1.48021e-15	2.26111e-14
ENSG00000136942.15	175.821	4.90909	0.615414	7.97689	1.50064e-15	2.29013e-14
ENSG00000196911.11	11.3923	-2.12224	0.266081	-7.97591	1.51265e-15	2.30625e-14
ENSG00000111275.13	27.6237	6.38852	0.801036	7.97532	1.51982e-15	2.31497e-14
ENSG00000196547.15	7.67423	3.82449	0.479855	7.97009	1.58553e-15	2.41275e-14
ENSG00000198918.8	422.604	5.32385	0.668211	7.96733	1.62143e-15	2.46504e-14
ENSG00000070182.21	7.83188	7.12889	0.895234	7.96316	1.67697e-15	2.54704e-14
ENSG00000143774.17	15.7718	3.6092	0.453583	7.95708	1.76152e-15	2.67293e-14
ENSG00000000971.16	19.7307	4.85533	0.61074	7.94992	1.86637e-15	2.82933e-14
ENSG00000163644.15	29.9534	-1.97675	0.248916	-7.94144	1.99846e-15	3.0267e-14
ENSG00000129355.7	15.5692	3.56185	0.448772	7.93688	2.07333e-15	3.13527e-14
ENSG00000253293.5	4.41192	6.87696	0.866474	7.93672	2.07604e-15	3.13527e-14
ENSG00000276615.2	8.60814	7.61342	0.959252	7.93683	2.07408e-15	3.13527e-14
ENSG00000128944.13	5.54383	4.07591	0.513619	7.93566	2.09384e-15	3.15917e-14
ENSG00000066654.14	63.0713	-1.48106	0.186658	-7.93463	2.11127e-15	3.17946e-14
ENSG00000106789.13	3.68345	6.33907	0.798912	7.93463	2.11122e-15	3.17946e-14
ENSG00000163611.11	21.2801	-2.10714	0.265714	-7.93011	2.18956e-15	3.29424e-14
ENSG00000166483.11	23.281	-2.12539	0.26806	-7.92878	2.21316e-15	3.32661e-14
ENSG00000183690.13	2.88025	5.07624	0.640542	7.92491	2.28318e-15	3.42752e-14
ENSG00000170525.21	25.9049	6.12607	0.773022	7.92483	2.28458e-15	3.42752e-14
ENSG00000198826.11	8.93276	3.89739	0.491976	7.92191	2.33888e-15	3.50569e-14
ENSG00000162129.14	8.07938	3.47619	0.438917	7.91991	2.37685e-15	3.55926e-14
ENSG00000198160.15	34.4377	1.83065	0.231167	7.91916	2.39125e-15	3.57747e-14
ENSG00000274619.2	9.99057	5.97934	0.755908	7.91014	2.57095e-15	3.8427e-14
ENSG00000163519.14	13.2092	8.38386	1.06075	7.9037	2.70744e-15	4.04293e-14
ENSG00000177105.10	32.1251	3.88574	0.491908	7.89932	2.80436e-15	4.18373e-14
ENSG00000035687.10	115.948	2.22969	0.282303	7.89823	2.82881e-15	4.21627e-14
ENSG00000107738.20	45.97	6.82643	0.865079	7.89111	2.99509e-15	4.45995e-14
ENSG00000137309.20	90.5997	6.80313	0.862743	7.88546	3.13368e-15	4.66196e-14
ENSG00000104918.8	7.70632	7.6598	0.972513	7.87629	3.37236e-15	5.01238e-14
ENSG00000151470.13	13.5582	3.95066	0.501704	7.87448	3.42152e-15	5.08071e-14
ENSG00000188175.10	4.14741	6.34576	0.805993	7.87322	3.45617e-15	5.1274e-14
ENSG00000164125.16	3.85113	6.51226	0.828329	7.86193	3.78257e-15	5.60642e-14
ENSG00000157404.16	7.98785	5.50534	0.700342	7.86093	3.81286e-15	5.64607e-14
ENSG00000230266.1	3.00193	-4.46398	0.567956	-7.85974	3.84944e-15	5.69496e-14
ENSG00000074219.14	3.63997	-4.93418	0.62791	-7.85811	3.89988e-15	5.76424e-14
ENSG00000114346.14	31.6586	3.10181	0.394953	7.85362	4.04199e-15	5.96877e-14
ENSG00000197841.15	13.946	-2.25859	0.287594	-7.85339	4.04946e-15	5.97427e-14
ENSG00000120306.11	4.44109	5.36312	0.682964	7.85271	4.07152e-15	6.00126e-14
ENSG00000164056.11	2.59199	5.76297	0.734131	7.85005	4.15861e-15	6.12397e-14
ENSG00000139174.12	8.96289	-4.13258	0.526487	-7.84934	4.18216e-15	6.15298e-14
ENSG00000089159.16	21.1689	5.84454	0.744727	7.8479	4.23052e-15	6.2184e-14
ENSG00000092020.10	77.7906	3.36317	0.428825	7.84275	4.40773e-15	6.47292e-14
ENSG00000288210.1	4.04734	4.29576	0.547753	7.8425	4.41648e-15	6.4798e-14
ENSG00000111796.4	12.614	8.17853	1.04323	7.83964	4.51831e-15	6.62313e-14
ENSG00000131127.14	16.3965	-1.82376	0.232641	-7.83935	4.5287e-15	6.62619e-14
ENSG00000196678.14	20.3975	2.93935	0.374942	7.83946	4.52474e-15	6.62619e-14
ENSG00000171777.16	22.1172	8.65921	1.10471	7.83842	4.56246e-15	6.66946e-14
ENSG00000150093.20	424.809	-2.29364	0.292715	-7.83575	4.66049e-15	6.80654e-14
ENSG00000173542.9	9.05115	4.12498	0.526545	7.83406	4.72378e-15	6.89266e-14
ENSG00000129007.14	2.38892	5.48332	0.70005	7.83276	4.77278e-15	6.9578e-14
ENSG00000131469.15	622.732	4.5991	0.587561	7.82744	4.97905e-15	7.25188e-14
ENSG00000181104.7	8.86827	5.75379	0.735299	7.82511	5.07203e-15	7.38057e-14
ENSG00000173262.12	7.59361	7.55821	0.966468	7.82045	5.26359e-15	7.65234e-14
ENSG00000112773.16	47.9776	3.70363	0.473645	7.81942	5.30652e-15	7.70773e-14
ENSG00000234836.7	9.91396	7.69319	0.984653	7.8131	5.57975e-15	8.09723e-14
ENSG00000184584.13	10.7217	5.63863	0.721823	7.81166	5.64407e-15	8.18313e-14
ENSG00000079215.14	4.22563	5.86964	0.75154	7.81015	5.71197e-15	8.27406e-14
ENSG00000166451.13	10.0202	3.63737	0.465848	7.80807	5.80704e-15	8.39655e-14
ENSG00000285906.2	4.05521	6.61236	0.846854	7.80815	5.80341e-15	8.39655e-14
ENSG00000128708.13	109.399	3.57449	0.457864	7.80689	5.86179e-15	8.46803e-14
ENSG00000204370.13	33.6651	4.03362	0.516822	7.80466	5.96645e-15	8.61143e-14
ENSG00000131115.16	42.0823	-1.94404	0.249157	-7.80249	6.06968e-15	8.75251e-14
ENSG00000109452.12	4.38024	6.18493	0.793083	7.79859	6.26012e-15	9.01897e-14
ENSG00000180667.10	15.7353	3.08587	0.395789	7.79675	6.35226e-15	9.14348e-14
ENSG00000119844.15	50.965	-1.89245	0.242828	-7.79335	6.52575e-15	9.38473e-14
ENSG00000163728.11	78.865	-1.75017	0.224579	-7.79312	6.53769e-15	9.39345e-14
ENSG00000260078.3	9.51427	7.56317	0.97051	7.79298	6.54473e-15	9.39511e-14
ENSG00000263513.5	5.67237	5.20578	0.668042	7.79259	6.56499e-15	9.41572e-14
ENSG00000110756.18	22.136	-2.31675	0.297308	-7.79243	6.57309e-15	9.41887e-14
ENSG00000155307.19	187.107	2.93613	0.37688	7.79061	6.6685e-15	9.54702e-14
ENSG00000255717.7	513.487	-2.33679	0.300075	-7.78737	6.84189e-15	9.78647e-14
ENSG00000198919.13	12.7381	-2.41693	0.310487	-7.78431	7.00925e-15	1.00169e-13
PB_novel_06663	6.11634	-4.07421	0.523405	-7.78404	7.02447e-15	1.00297e-13
ENSG00000120662.16	17.1041	-1.7236	0.221501	-7.78145	7.16986e-15	1.02281e-13
ENSG00000164251.5	2.84504	5.96089	0.766685	7.77488	7.55178e-15	1.07633e-13
ENSG00000268362.6	10.1336	-2.04181	0.262698	-7.77248	7.6962e-15	1.09594e-13
ENSG00000118680.14	109.079	3.40394	0.438048	7.77069	7.80572e-15	1.11054e-13
ENSG00000132749.11	8.19629	6.48763	0.835998	7.76034	8.47001e-15	1.20398e-13
ENSG00000125676.20	58.6092	-1.78266	0.229729	-7.75981	8.50559e-15	1.20796e-13
ENSG00000147206.17	4.42147	6.79313	0.875889	7.75569	8.78626e-15	1.24671e-13
ENSG00000203760.9	6.79648	6.8245	0.880169	7.75363	8.93032e-15	1.26603e-13
ENSG00000167851.15	2.62877	5.86148	0.75609	7.75236	9.01996e-15	1.27647e-13
ENSG00000105514.8	10.4215	6.7635	0.872432	7.75246	9.01267e-15	1.27647e-13
ENSG00000069493.15	97.8813	-2.71831	0.350717	-7.75071	9.13778e-15	1.292e-13
ENSG00000063854.13	18.542	3.61811	0.466881	7.74953	9.223e-15	1.30289e-13
ENSG00000204604.12	53.2127	-2.23859	0.289014	-7.74563	9.51105e-15	1.342e-13
ENSG00000171503.12	20.225	2.14697	0.277188	7.74555	9.51664e-15	1.342e-13
ENSG00000105610.6	14.7875	8.08812	1.04453	7.74334	9.68402e-15	1.3644e-13
ENSG00000164010.15	68.5921	4.08949	0.528209	7.74219	9.77179e-15	1.37555e-13
ENSG00000177700.6	15.2295	3.74155	0.483314	7.74144	9.82978e-15	1.38249e-13
ENSG00000173083.15	4.53296	6.44727	0.833034	7.73951	9.98032e-15	1.40243e-13
ENSG00000141682.12	568.396	-3.0504	0.394151	-7.73918	1.00057e-14	1.40476e-13
ENSG00000103148.17	25.4025	7.0539	0.911509	7.7387	1.00439e-14	1.40888e-13
ENSG00000189144.14	2.01552	-3.55465	0.459387	-7.73781	1.01141e-14	1.41748e-13
ENSG00000145348.17	24.6281	-2.03388	0.262992	-7.73362	1.04533e-14	1.46374e-13
ENSG00000015479.20	895.659	-1.74248	0.225319	-7.73339	1.04717e-14	1.46503e-13
ENSG00000127314.18	389.097	1.90308	0.246129	7.73203	1.05848e-14	1.47955e-13
ENSG00000170854.18	21.1765	-1.44614	0.187079	-7.73009	1.07475e-14	1.49987e-13
ENSG00000138777.20	57.2127	1.71117	0.221366	7.73007	1.07489e-14	1.49987e-13
ENSG00000214189.9	7.99798	4.19388	0.542858	7.72556	1.11361e-14	1.55253e-13
ENSG00000216490.4	35.1747	3.45842	0.447674	7.72532	1.1157e-14	1.55409e-13
ENSG00000163026.12	15.762	-2.57602	0.333535	-7.72339	1.13277e-14	1.57649e-13
ENSG00000166900.17	46.9957	3.09695	0.401364	7.71607	1.19973e-14	1.66823e-13
ENSG00000121797.10	5.63906	3.45522	0.447837	7.71534	1.2066e-14	1.67632e-13
ENSG00000115514.12	33.2083	4.59419	0.595535	7.71439	1.21565e-14	1.68742e-13
ENSG00000155959.12	120.23	3.47513	0.450605	7.71214	1.23728e-14	1.71596e-13
ENSG00000196664.5	20.9533	-3.79583	0.492897	-7.70106	1.34944e-14	1.86989e-13
ENSG00000152684.11	5.1507	2.3958	0.311148	7.69988	1.3619e-14	1.88551e-13
ENSG00000237943.7	2.98137	5.73196	0.744942	7.69451	1.42042e-14	1.96484e-13
ENSG00000128311.14	5.24309	5.49094	0.714892	7.68081	1.5809e-14	2.18493e-13
ENSG00000234883.6	3.52593	-4.01882	0.523283	-7.68001	1.59078e-14	2.19668e-13
ENSG00000136235.17	5.70551	7.11585	0.926602	7.6795	1.59706e-14	2.20345e-13
ENSG00000108953.17	64.5289	1.84069	0.239758	7.67727	1.62514e-14	2.24026e-13
ENSG00000179750.16	7.29113	5.26927	0.68639	7.67678	1.63132e-14	2.24684e-13
ENSG00000166508.18	195.635	4.31677	0.562546	7.67364	1.67182e-14	2.30062e-13
ENSG00000237192.8	6.8254	7.46255	0.973164	7.66834	1.74243e-14	2.39573e-13
ENSG00000198464.14	17.6938	-2.24267	0.292562	-7.66562	1.77965e-14	2.4448e-13
ENSG00000100225.18	141.337	2.38387	0.310986	7.66551	1.7812e-14	2.44482e-13
ENSG00000285226.2	17.641	4.10213	0.535172	7.66506	1.78747e-14	2.44998e-13
ENSG00000110080.20	2.38943	5.58289	0.728359	7.66502	1.78803e-14	2.44998e-13
ENSG00000243189.7	20.3212	-4.2329	0.552296	-7.66419	1.7997e-14	2.46386e-13
ENSG00000284061.2	9.81973	8.0318	1.04836	7.66131	1.8404e-14	2.51743e-13
ENSG00000108465.15	145.75	-2.79485	0.364883	-7.65956	1.86573e-14	2.54988e-13
ENSG00000139629.16	5.49755	5.9475	0.77672	7.6572	1.90031e-14	2.59492e-13
ENSG00000148926.10	12.0654	6.65862	0.869769	7.65562	1.92378e-14	2.62473e-13
ENSG00000241468.8	52.3463	4.08772	0.534032	7.65444	1.94154e-14	2.6467e-13
ENSG00000163430.12	2.25435	5.25198	0.686356	7.65199	1.979e-14	2.69546e-13
ENSG00000188343.13	3.22855	5.74004	0.750494	7.64835	2.03568e-14	2.7703e-13
ENSG00000173218.15	5.11621	5.70976	0.746738	7.64627	2.06893e-14	2.81314e-13
ENSG00000184292.7	5.79033	7.25433	0.949029	7.64395	2.10659e-14	2.86192e-13
ENSG00000224152.1	2.36653	4.77076	0.624136	7.64379	2.1092e-14	2.86303e-13
ENSG00000282540.1	3.24506	5.9311	0.776134	7.64185	2.14124e-14	2.90404e-13
ENSG00000117115.13	16.8016	8.7833	1.14988	7.63845	2.19845e-14	2.9791e-13
ENSG00000167173.19	17.5602	9.70596	1.27126	7.63488	2.26027e-14	3.06027e-13
ENSG00000140525.19	44.5599	2.25583	0.295531	7.63317	2.29056e-14	3.09866e-13
ENSG00000008083.14	18.0452	3.97284	0.520577	7.6316	2.31861e-14	3.13396e-13
ENSG00000072401.15	46.0126	2.16935	0.284478	7.62573	2.42651e-14	3.27703e-13
ENSG00000164440.15	2.94807	-4.4726	0.58668	-7.62357	2.46763e-14	3.32973e-13
ENSG00000197170.10	37.1145	3.28995	0.431676	7.62133	2.51069e-14	3.38497e-13
ENSG00000163683.12	34.3905	-2.90981	0.381881	-7.61968	2.54312e-14	3.42581e-13
ENSG00000132386.11	3.38662	-3.1519	0.413724	-7.61836	2.56912e-14	3.45791e-13
ENSG00000108175.17	3.56807	5.23811	0.687948	7.61411	2.65524e-14	3.57082e-13
ENSG00000105369.10	28.1143	-4.02452	0.528617	-7.6133	2.67182e-14	3.59009e-13
ENSG00000198821.11	7.52979	7.30995	0.960922	7.60723	2.80035e-14	3.75962e-13
ENSG00000274000.4	3.9577	6.23057	0.819247	7.60524	2.84378e-14	3.81473e-13
ENSG00000257335.8	3.65503	6.51799	0.857269	7.6032	2.88887e-14	3.87196e-13
ENSG00000121691.7	699.975	2.76233	0.363329	7.60283	2.89716e-14	3.87981e-13
ENSG00000081237.20	496.475	-2.40335	0.316236	-7.59985	2.96481e-14	3.96708e-13
ENSG00000133169.6	9.09665	7.89673	1.03937	7.5976	3.01666e-14	4.03307e-13
ENSG00000111775.3	18.1579	4.11117	0.541288	7.59516	3.0741e-14	4.10299e-13
ENSG00000106348.18	25.3241	7.25084	0.954656	7.59524	3.07226e-14	4.10299e-13
ENSG00000162704.16	231.046	2.23148	0.293916	7.59224	3.14426e-14	4.19313e-13
ENSG00000125753.14	21.7324	8.785	1.15781	7.58759	3.25917e-14	4.34274e-13
ENSG00000090339.9	29.1972	7.47523	0.985792	7.58297	3.37738e-14	4.4965e-13
ENSG00000135604.10	39.7035	3.34575	0.441607	7.5763	3.55536e-14	4.72951e-13
ENSG00000115107.20	10.2513	7.90649	1.04374	7.57515	3.58724e-14	4.76795e-13
ENSG00000213057.5	2.46509	-3.838	0.507197	-7.56708	3.81701e-14	5.06913e-13
ENSG00000120727.13	100.66	3.98993	0.527369	7.56571	3.85745e-14	5.117e-13
ENSG00000106070.20	3.20322	4.88555	0.645755	7.56564	3.85946e-14	5.117e-13
ENSG00000125977.7	111.691	2.82586	0.373543	7.565	3.87864e-14	5.13815e-13
ENSG00000172164.15	7.50663	4.33971	0.573987	7.56064	4.01083e-14	5.30886e-13
ENSG00000127838.14	19.0084	6.61889	0.8757	7.55839	4.0808e-14	5.397e-13
ENSG00000136869.16	20.3404	3.56348	0.471498	7.55778	4.09999e-14	5.41389e-13
ENSG00000288524.1	3.6771	6.51987	0.862671	7.55777	4.10035e-14	5.41389e-13
ENSG00000136783.10	74.9401	3.27294	0.433125	7.55657	4.13836e-14	5.45955e-13
ENSG00000117280.13	55.9298	-2.06562	0.273369	-7.55616	4.15155e-14	5.47244e-13
ENSG00000226918.1	6.46939	-5.95488	0.788247	-7.55458	4.2021e-14	5.5345e-13
ENSG00000123689.6	4.3388	6.71407	0.888861	7.55357	4.23499e-14	5.57322e-13
ENSG00000284548.3	62.5803	1.53	0.202607	7.55158	4.30025e-14	5.65443e-13
ENSG00000197930.13	14.5412	2.774	0.367437	7.54961	4.36575e-14	5.73584e-13
ENSG00000124172.10	180.807	4.61441	0.611342	7.548	4.41986e-14	5.80216e-13
ENSG00000196696.13	11.3666	-3.8691	0.512799	-7.54507	4.52056e-14	5.92947e-13
ENSG00000141469.18	21.603	3.54461	0.469802	7.5449	4.52637e-14	5.93222e-13
ENSG00000163697.17	17.3609	-3.80053	0.504163	-7.5383	4.76156e-14	6.23533e-13
ENSG00000188002.10	4.18103	-3.03609	0.402845	-7.53662	4.82315e-14	6.31082e-13
ENSG00000166501.14	58.2209	-2.76193	0.366699	-7.53186	5.00233e-14	6.5399e-13
ENSG00000275568.4	4.63395	3.3156	0.440378	7.529	5.11299e-14	6.6791e-13
ENSG00000121570.12	4.0421	5.4963	0.730204	7.52707	5.18912e-14	6.77301e-13
ENSG00000165502.7	64.7917	4.44097	0.590041	7.52654	5.21023e-14	6.795e-13
ENSG00000169896.18	130.271	6.06107	0.805373	7.52579	5.24019e-14	6.8285e-13
ENSG00000002834.18	92.8685	6.75629	0.897925	7.52434	5.29882e-14	6.89928e-13
ENSG00000176788.9	9.29711	6.36066	0.845446	7.52343	5.33557e-14	6.94145e-13
ENSG00000143771.12	17.1082	4.18049	0.555868	7.52064	5.45085e-14	7.08566e-13
ENSG00000173930.9	3.53911	6.17185	0.820741	7.51985	5.48389e-14	7.12281e-13
ENSG00000115355.17	23.2165	-2.60921	0.347025	-7.51879	5.52848e-14	7.17489e-13
ENSG00000086065.14	103.35	3.5099	0.466993	7.51596	5.64959e-14	7.32611e-13
ENSG00000010671.16	275.033	-2.27419	0.30261	-7.51524	5.68045e-14	7.35418e-13
ENSG00000164442.10	119.054	3.23891	0.430974	7.51533	5.67663e-14	7.35418e-13
ENSG00000172172.8	26.029	5.5632	0.740436	7.51341	5.76081e-14	7.45217e-13
ENSG00000261824.7	13.6211	-1.84828	0.246044	-7.51201	5.82279e-14	7.52625e-13
ENSG00000152700.14	27.2733	3.44812	0.459126	7.51019	5.90418e-14	7.62528e-13
ENSG00000085365.18	27.0282	-1.81491	0.241761	-7.50707	6.04671e-14	7.79674e-13
ENSG00000108679.13	11.9253	6.84735	0.912111	7.50715	6.04304e-14	7.79674e-13
ENSG00000168496.4	21.0791	2.38754	0.318154	7.50435	6.17343e-14	7.95371e-13
ENSG00000214212.9	3.93089	6.18582	0.824461	7.50287	6.24358e-14	8.03761e-13
ENSG00000162433.15	11.4255	6.05603	0.807353	7.50108	6.32922e-14	8.14128e-13
ENSG00000164124.11	1.78252	4.94777	0.65994	7.4973	6.51457e-14	8.37296e-13
ENSG00000204020.6	3.90047	4.5025	0.600595	7.49673	6.54293e-14	8.39588e-13
ENSG00000178719.17	24.9856	5.7882	0.772091	7.49679	6.54004e-14	8.39588e-13
ENSG00000164087.8	3.94471	4.07442	0.543956	7.49034	6.86937e-14	8.80769e-13
ENSG00000108179.14	51.8926	3.16427	0.42277	7.48461	7.17621e-14	9.19373e-13
ENSG00000147872.10	80.2424	3.14579	0.420372	7.48333	7.2462e-14	9.27594e-13
ENSG00000170949.17	15.0105	-2.48274	0.3319	-7.48038	7.41064e-14	9.47885e-13
ENSG00000189221.10	3.36861	5.70289	0.763144	7.4729	7.84486e-14	1.00262e-12
PB_novel_13891	3.48711	-3.8822	0.519864	-7.46773	8.15902e-14	1.04194e-12
ENSG00000126777.18	107.936	-1.81651	0.243327	-7.46529	8.31193e-14	1.06062e-12
ENSG00000180964.17	25.793	5.0144	0.671787	7.46427	8.37617e-14	1.06713e-12
ENSG00000100242.15	17.5863	7.14181	0.9568	7.46427	8.3763e-14	1.06713e-12
ENSG00000135636.14	11.2966	8.01209	1.07369	7.46221	8.50827e-14	1.08307e-12
ENSG00000166503.9	4.3091	5.74708	0.770212	7.46168	8.54292e-14	1.08662e-12
ENSG00000136048.14	24.1308	2.98189	0.399633	7.46157	8.55004e-14	1.08666e-12
ENSG00000140057.9	2.50053	5.48028	0.734605	7.46017	8.64083e-14	1.09732e-12
ENSG00000120756.13	9.09144	3.45014	0.463215	7.44824	9.45951e-14	1.20033e-12
ENSG00000101608.13	289.46	4.3147	0.579502	7.44553	9.65532e-14	1.22421e-12
ENSG00000134531.10	18.7625	7.95238	1.06855	7.44224	9.89899e-14	1.25411e-12
ENSG00000003400.15	11.0642	3.75819	0.50537	7.43651	1.03381e-13	1.30871e-12
ENSG00000148459.16	6.6069	2.55818	0.344086	7.43472	1.04792e-13	1.32551e-12
ENSG00000276463.4	18.949	4.01714	0.540423	7.43333	1.05898e-13	1.33844e-12
ENSG00000182512.5	3.87324	5.65597	0.760966	7.43261	1.06472e-13	1.34454e-12
ENSG00000106125.14	5.20754	5.95654	0.801416	7.43252	1.06549e-13	1.34454e-12
ENSG00000150672.17	3.65123	-4.65252	0.62607	-7.43132	1.07521e-13	1.35573e-12
ENSG00000151491.14	4.17317	5.59901	0.753864	7.42708	1.11018e-13	1.39872e-12
ENSG00000072952.19	2.33606	4.77828	0.643443	7.42612	1.11832e-13	1.40787e-12
ENSG00000282844.2	24.3448	6.62939	0.892731	7.42597	1.11958e-13	1.40834e-12
ENSG00000274047.4	17.4132	-2.47423	0.333318	-7.42305	1.14454e-13	1.4386e-12
ENSG00000273884.4	3.72116	6.63519	0.89479	7.41536	1.21296e-13	1.5234e-12
ENSG00000170677.6	6.75637	4.94344	0.667136	7.40994	1.26358e-13	1.58573e-12
ENSG00000143256.5	5.27076	4.98247	0.672454	7.40939	1.26885e-13	1.59109e-12
ENSG00000069424.15	13.7561	5.56301	0.750969	7.40777	1.28437e-13	1.60929e-12
ENSG00000114503.11	86.5752	-1.31755	0.177916	-7.40544	1.30717e-13	1.63658e-12
ENSG00000229754.1	2.8795	6.29564	0.850265	7.40432	1.31821e-13	1.6491e-12
ENSG00000163734.4	2.52211	5.96112	0.805587	7.39973	1.36463e-13	1.70585e-12
ENSG00000112739.17	216.574	-1.83857	0.248667	-7.39371	1.42787e-13	1.78349e-12
ENSG00000183291.17	503.063	3.7628	0.508989	7.39269	1.43887e-13	1.79583e-12
ENSG00000143537.14	14.5381	10.2009	1.38039	7.3899	1.46938e-13	1.83248e-12
ENSG00000122085.17	27.7908	-1.74487	0.236125	-7.38961	1.47263e-13	1.83509e-12
ENSG00000124767.7	117.033	-1.58847	0.215091	-7.3851	1.52343e-13	1.89692e-12
ENSG00000133103.17	23.3028	-2.03985	0.276219	-7.3849	1.52563e-13	1.89818e-12
ENSG00000232112.3	66.6482	4.69256	0.635453	7.38459	1.52925e-13	1.9012e-12
ENSG00000117228.10	66.3481	4.19687	0.568591	7.38118	1.56898e-13	1.94907e-12
ENSG00000111845.5	18.0452	4.11047	0.557066	7.37878	1.59742e-13	1.98286e-12
ENSG00000078043.16	12.6369	-1.31086	0.177719	-7.37601	1.63102e-13	2.023e-12
ENSG00000079156.17	5.38587	5.79071	0.78536	7.37333	1.66423e-13	2.06259e-12
ENSG00000145592.14	305.06	4.20548	0.570449	7.37223	1.67794e-13	2.07615e-12
ENSG00000164611.13	11.5853	4.77089	0.647152	7.37214	1.67907e-13	2.07615e-12
ENSG00000179820.16	12.6973	7.26111	0.984938	7.37215	1.67897e-13	2.07615e-12
ENSG00000181007.9	16.3741	-1.99728	0.270948	-7.37144	1.68796e-13	2.08551e-12
ENSG00000152582.14	2.53415	6.01597	0.816238	7.37036	1.70167e-13	2.10083e-12
ENSG00000197006.14	63.4846	1.42156	0.192932	7.36823	1.72908e-13	2.13302e-12
ENSG00000148634.16	76.7634	-2.33603	0.317092	-7.36704	1.74461e-13	2.15051e-12
ENSG00000142731.11	38.6663	2.48374	0.337266	7.36434	1.7803e-13	2.19282e-12
ENSG00000120334.15	16.5403	2.04206	0.277342	7.36297	1.79864e-13	2.2137e-12
ENSG00000130755.13	33.2382	4.46872	0.606947	7.36263	1.80322e-13	2.21763e-12
ENSG00000134049.6	78.5167	3.7523	0.509781	7.3606	1.83089e-13	2.24992e-12
ENSG00000275970.4	9.38258	7.96707	1.08247	7.3601	1.83769e-13	2.25654e-12
ENSG00000101474.12	98.8054	3.08422	0.41911	7.35897	1.8533e-13	2.27396e-12
ENSG00000143545.10	3.99352	3.46814	0.471369	7.35758	1.87272e-13	2.29602e-12
ENSG00000100162.15	3.30949	4.74015	0.644495	7.35483	1.91174e-13	2.34206e-12
ENSG00000135451.13	6.54176	6.63115	0.901637	7.35457	1.91543e-13	2.34478e-12
ENSG00000099246.17	116.192	1.76724	0.240321	7.35368	1.92819e-13	2.3586e-12
ENSG00000162086.16	20.5767	-1.81229	0.246462	-7.35321	1.93495e-13	2.36506e-12
ENSG00000187134.14	8.76498	5.91906	0.805123	7.35175	1.95629e-13	2.3893e-12
ENSG00000121005.9	2.94876	4.97037	0.676113	7.3514	1.96146e-13	2.39379e-12
ENSG00000282899.2	5.53288	6.02174	0.819404	7.34892	1.99808e-13	2.43661e-12
ENSG00000163634.12	15.551	3.8283	0.521057	7.34718	2.02434e-13	2.46675e-12
ENSG00000251369.9	14.4182	-2.27797	0.31039	-7.33906	2.15092e-13	2.619e-12
ENSG00000100336.17	12.1766	5.15821	0.703147	7.33589	2.20254e-13	2.67981e-12
ENSG00000158201.10	36.6515	-2.0646	0.281584	-7.33208	2.26606e-13	2.755e-12
ENSG00000172270.21	106.975	3.35439	0.457599	7.33041	2.29446e-13	2.7874e-12
ENSG00000210082.2	116.647	3.07733	0.420065	7.32584	2.37399e-13	2.88182e-12
ENSG00000276858.4	9.75608	8.02128	1.095	7.32539	2.38213e-13	2.88951e-12
ENSG00000241839.10	20.6499	8.8626	1.21087	7.31923	2.49403e-13	3.02295e-12
ENSG00000129226.14	68.661	4.22388	0.577121	7.31887	2.50062e-13	3.02633e-12
ENSG00000152380.10	1.93288	5.22164	0.713446	7.31891	2.49998e-13	3.02633e-12
ENSG00000158089.15	6.09684	4.64627	0.635191	7.31477	2.57826e-13	3.11794e-12
ENSG00000121858.11	38.8361	3.64401	0.498298	7.31292	2.61407e-13	3.15885e-12
ENSG00000114268.12	4.98887	6.50021	0.889183	7.31032	2.66515e-13	3.21813e-12
ENSG00000133026.13	4.61906	4.87918	0.667684	7.30762	2.71907e-13	3.28076e-12
ENSG00000164849.10	7.13193	6.17153	0.845316	7.30086	2.85945e-13	3.44753e-12
ENSG00000165338.17	4.90619	-2.8863	0.395439	-7.29898	2.89949e-13	3.49317e-12
ENSG00000088832.18	107.665	2.41207	0.330591	7.29624	2.95919e-13	3.56241e-12
ENSG00000171858.18	327.729	4.50405	0.617982	7.28833	3.13829e-13	3.77517e-12
ENSG00000185950.9	7.16683	2.98022	0.408979	7.28696	3.17037e-13	3.81089e-12
ENSG00000102384.13	6.732	4.13475	0.567626	7.28429	3.23371e-13	3.8841e-12
ENSG00000177602.5	6.45415	6.03602	0.828737	7.2834	3.25513e-13	3.90689e-12
ENSG00000138061.12	4.78351	6.97341	0.957453	7.28329	3.25773e-13	3.90708e-12
ENSG00000116459.11	87.5789	2.99961	0.411911	7.28219	3.28434e-13	3.93604e-12
ENSG00000125743.10	35.7779	4.20065	0.576931	7.28102	3.31305e-13	3.96746e-12
ENSG00000111665.12	5.26762	4.36612	0.599944	7.27756	3.39922e-13	4.06759e-12
ENSG00000056736.10	8.39621	-6.04672	0.831049	-7.27602	3.43821e-13	4.11117e-12
ENSG00000160883.11	47.8432	9.63254	1.32428	7.27381	3.49493e-13	4.17586e-12
ENSG00000275841.4	3.89342	6.66383	0.916623	7.26998	3.59549e-13	4.2928e-12
ENSG00000074416.14	3.39836	5.74535	0.790539	7.26764	3.65831e-13	4.36454e-12
ENSG00000039068.19	13.4378	7.58322	1.04397	7.2638	3.76362e-13	4.48683e-12
ENSG00000092529.25	15.1356	4.35121	0.599177	7.26198	3.81452e-13	4.54412e-12
ENSG00000084090.13	314.831	-2.47704	0.341242	-7.25891	3.90233e-13	4.64525e-12
ENSG00000197324.9	28.6311	5.90462	0.813596	7.25743	3.94525e-13	4.69285e-12
ENSG00000267680.5	30.7062	-2.26327	0.311927	-7.25577	3.99384e-13	4.74711e-12
ENSG00000188243.13	31.3329	5.552	0.76557	7.25211	4.10333e-13	4.87362e-12
ENSG00000142669.15	33.0992	2.85498	0.393729	7.25112	4.13339e-13	4.90445e-12
ENSG00000135709.12	2.12855	5.43305	0.749278	7.25105	4.13543e-13	4.90445e-12
ENSG00000198056.15	26.9644	3.98296	0.549398	7.24969	4.17727e-13	4.95039e-12
ENSG00000198053.12	39.9498	7.3546	1.01481	7.24731	4.25144e-13	5.03455e-12
ENSG00000070526.15	3.9911	5.22375	0.721029	7.24486	4.3288e-13	5.12236e-12
ENSG00000187210.14	14.6524	4.54999	0.628186	7.24306	4.38674e-13	5.18708e-12
ENSG00000177868.12	6.87526	2.08086	0.287335	7.24191	4.42396e-13	5.22722e-12
ENSG00000275066.5	17.4427	-2.33162	0.322038	-7.24021	4.47975e-13	5.28922e-12
ENSG00000153250.20	21.5107	2.52044	0.348134	7.23987	4.49129e-13	5.29893e-12
ENSG00000103257.9	16.2321	8.12661	1.12271	7.23837	4.54122e-13	5.35387e-12
ENSG00000285390.2	46.9528	3.53166	0.487927	7.23809	4.55043e-13	5.35682e-12
ENSG00000129244.9	4.25093	6.63536	0.916725	7.23811	4.54966e-13	5.35682e-12
ENSG00000182489.9	2.5865	-4.29643	0.594195	-7.23068	4.80584e-13	5.65333e-12
ENSG00000135002.12	49.3972	2.26374	0.313085	7.23042	4.81487e-13	5.65978e-12
ENSG00000168653.11	26.7026	4.7	0.650055	7.23016	4.82424e-13	5.66662e-12
ENSG00000100554.12	34.9464	3.03166	0.419331	7.22974	4.83924e-13	5.68005e-12
ENSG00000155115.7	21.8039	5.48428	0.75868	7.22872	4.87577e-13	5.71454e-12
ENSG00000128016.7	59.6012	5.75756	0.796483	7.22872	4.87555e-13	5.71454e-12
ENSG00000159259.8	5.97694	2.75365	0.381043	7.22662	4.95146e-13	5.79898e-12
ENSG00000273738.4	9.13977	7.93073	1.09788	7.2237	5.05908e-13	5.92068e-12
ENSG00000128973.13	10.3022	5.0774	0.702945	7.22304	5.08389e-13	5.94536e-12
ENSG00000172594.13	4.19305	5.35416	0.741432	7.22138	5.14634e-13	6.01398e-12
ENSG00000278634.4	3.49336	6.5242	0.90357	7.22047	5.18078e-13	6.04981e-12
ENSG00000205323.9	8.82973	3.19712	0.442834	7.21968	5.21116e-13	6.08083e-12
ENSG00000133246.12	14.9707	8.63388	1.19607	7.21851	5.25604e-13	6.12871e-12
ENSG00000233098.9	7.49855	-4.9496	0.685701	-7.2183	5.26414e-13	6.13307e-12
ENSG00000140463.14	16.2699	-1.95251	0.270498	-7.21821	5.26745e-13	6.13307e-12
ENSG00000106992.19	2.23538	4.81313	0.666845	7.21777	5.28488e-13	6.14887e-12
ENSG00000133317.16	3.10359	6.32231	0.875989	7.21734	5.30126e-13	6.16344e-12
ENSG00000105968.19	58.8477	2.18689	0.303134	7.21426	5.4229e-13	6.30028e-12
ENSG00000070495.15	22.8659	2.53611	0.351618	7.21266	5.48675e-13	6.36982e-12
ENSG00000136051.15	29.0793	-1.96541	0.272579	-7.21043	5.5776e-13	6.47059e-12
ENSG00000241490.1	2.82596	-3.9593	0.549148	-7.20989	5.59958e-13	6.48835e-12
ENSG00000239713.9	36.9411	-2.50426	0.347338	-7.20986	5.60104e-13	6.48835e-12
ENSG00000105011.9	4.03827	3.89876	0.540781	7.20951	5.61544e-13	6.50031e-12
ENSG00000198189.11	137.165	2.93994	0.407872	7.208	5.67788e-13	6.56782e-12
ENSG00000102543.14	23.0657	1.89177	0.262504	7.20662	5.73562e-13	6.62981e-12
ENSG00000186001.14	8.47929	-1.92197	0.266758	-7.20491	5.80819e-13	6.70399e-12
ENSG00000034533.12	19.8642	-1.56641	0.217406	-7.20497	5.80566e-13	6.70399e-12
ENSG00000140718.21	24.6145	-2.10819	0.292613	-7.20471	5.81685e-13	6.70913e-12
ENSG00000177628.16	23.1175	3.14309	0.43668	7.1977	6.12389e-13	7.05817e-12
ENSG00000103196.12	2.46254	5.96694	0.829065	7.19719	6.14645e-13	7.07906e-12
ENSG00000273841.5	18.1268	4.41597	0.613663	7.19607	6.19707e-13	7.13221e-12
ENSG00000197766.8	11.4347	5.82479	0.809529	7.19528	6.23323e-13	7.16866e-12
PB_novel_03255	2.79167	5.49612	0.763867	7.19512	6.24071e-13	7.17209e-12
ENSG00000198513.13	5.77788	-2.21155	0.3074	-7.19437	6.27511e-13	7.20644e-12
ENSG00000213186.8	5.96086	4.0012	0.556177	7.19412	6.28666e-13	7.21452e-12
ENSG00000258659.7	33.9167	-2.13977	0.297623	-7.18954	6.50103e-13	7.45516e-12
ENSG00000106397.12	18.4534	7.45524	1.03722	7.18773	6.58784e-13	7.54929e-12
ENSG00000233450.7	4.28073	5.73123	0.797378	7.1876	6.59405e-13	7.55099e-12
ENSG00000185198.12	2.50083	6.00587	0.835752	7.18618	6.66268e-13	7.62411e-12
ENSG00000163170.12	4.16544	5.15899	0.717917	7.18606	6.66874e-13	7.62559e-12
ENSG00000175592.9	2.02427	5.70596	0.794504	7.18179	6.88044e-13	7.86202e-12
ENSG00000274173.1	2.5532	6.0377	0.840786	7.18102	6.91917e-13	7.90063e-12
ENSG00000165733.8	57.04	-2.03281	0.283121	-7.18001	6.97074e-13	7.95382e-12
ENSG00000165406.16	18.8406	4.15596	0.578842	7.17977	6.98282e-13	7.96191e-12
ENSG00000055118.16	15.2825	5.98156	0.833388	7.1774	7.10475e-13	8.09515e-12
ENSG00000283750.3	8.38838	7.80407	1.08777	7.17435	7.26498e-13	8.27182e-12
ENSG00000245498.7	2.06899	-3.86063	0.538714	-7.16639	7.70016e-13	8.74859e-12
ENSG00000255561.7	14.5882	-2.01096	0.280603	-7.16654	7.6915e-13	8.74859e-12
ENSG00000145287.11	73.1226	4.44	0.619551	7.16648	7.6952e-13	8.74859e-12
ENSG00000171448.9	9.78513	-1.99157	0.278021	-7.16338	7.87139e-13	8.93677e-12
ENSG00000267731.1	2.88947	-4.33443	0.605225	-7.16169	7.96894e-13	9.04109e-12
ENSG00000213903.9	5.60834	7.07428	0.988508	7.15652	8.27487e-13	9.38151e-12
ENSG00000113088.6	3.15913	6.3354	0.88552	7.15444	8.40166e-13	9.51851e-12
PB_novel_18767	2.22229	-4.49101	0.627914	-7.15228	8.53497e-13	9.66267e-12
ENSG00000145741.16	242.753	3.65441	0.510992	7.1516	8.5773e-13	9.69684e-12
ENSG00000196517.13	19.4646	8.70383	1.21703	7.15167	8.57276e-13	9.69684e-12
ENSG00000155099.8	26.356	1.82422	0.255173	7.14895	8.74463e-13	9.87901e-12
ENSG00000095932.7	3.02395	6.20028	0.86761	7.14639	8.90929e-13	1.00579e-11
ENSG00000115641.19	3.11836	6.15619	0.861533	7.14563	8.95849e-13	1.01063e-11
ENSG00000086288.12	5.63494	7.14424	0.999949	7.14461	9.02525e-13	1.01744e-11
ENSG00000086061.16	233.475	2.52676	0.353726	7.14326	9.11457e-13	1.02679e-11
ENSG00000196747.4	4.06055	4.23184	0.592489	7.14248	9.16622e-13	1.03188e-11
ENSG00000111640.15	141.318	2.83907	0.397571	7.14103	9.26322e-13	1.04206e-11
ENSG00000249790.3	9.89146	7.15397	1.00186	7.14072	9.2845e-13	1.04372e-11
ENSG00000136542.9	17.3482	5.6717	0.794501	7.1387	9.42171e-13	1.0584e-11
ENSG00000175581.14	15.4326	4.12974	0.578514	7.13853	9.43367e-13	1.059e-11
ENSG00000171840.12	2.75594	5.25955	0.736954	7.13688	9.54699e-13	1.07097e-11
ENSG00000224091.1	3.41423	6.41395	0.898867	7.1356	9.63648e-13	1.08025e-11
ENSG00000127920.6	5.13931	6.55959	0.919818	7.1314	9.93563e-13	1.113e-11
ENSG00000187912.12	4.3137	-4.67217	0.655212	-7.13076	9.98127e-13	1.11733e-11
ENSG00000168421.13	110.541	-2.39441	0.335906	-7.1282	1.01686e-12	1.13751e-11
ENSG00000141506.14	12.0122	6.17503	0.866559	7.12591	1.03392e-12	1.15577e-11
ENSG00000093183.14	19.5273	2.12714	0.298525	7.12551	1.03699e-12	1.15759e-11
ENSG00000160117.16	13.0908	8.18651	1.14889	7.1256	1.03628e-12	1.15759e-11
ENSG00000142168.15	59.4433	3.73144	0.523777	7.12411	1.04756e-12	1.16857e-11
ENSG00000196502.12	7.62706	4.66929	0.655605	7.12211	1.06288e-12	1.18483e-11
ENSG00000142197.12	8.9344	-2.86405	0.402144	-7.12196	1.06401e-12	1.18526e-11
ENSG00000248571.1	4.07551	-4.51906	0.634706	-7.11993	1.07985e-12	1.20206e-11
ENSG00000131174.7	30.876	4.07755	0.57321	7.11354	1.13102e-12	1.25815e-11
ENSG00000166925.9	8.84054	6.25377	0.879389	7.11149	1.14796e-12	1.2761e-11
ENSG00000255819.7	4.26958	6.128	0.86182	7.11053	1.15597e-12	1.28411e-11
ENSG00000159256.13	166.15	-1.73721	0.244324	-7.11029	1.15799e-12	1.28547e-11
ENSG00000221944.9	17.8528	-1.74594	0.245783	-7.10358	1.21568e-12	1.34857e-11
ENSG00000189164.15	3.36033	-2.62376	0.369507	-7.1007	1.24122e-12	1.37499e-11
ENSG00000186407.7	16.9006	8.54404	1.20326	7.10072	1.24108e-12	1.37499e-11
ENSG00000082438.17	35.3146	-3.81039	0.536649	-7.10033	1.24455e-12	1.37773e-11
ENSG00000124802.12	25.2525	5.97758	0.842026	7.09905	1.25619e-12	1.38965e-11
ENSG00000111843.14	9.30064	3.25829	0.459001	7.09865	1.25978e-12	1.39265e-11
ENSG00000138663.9	48.8125	3.08624	0.434776	7.09846	1.26157e-12	1.39366e-11
ENSG00000182287.15	124.514	1.6452	0.231858	7.09573	1.28675e-12	1.42049e-11
ENSG00000136100.14	35.9736	-2.03286	0.286523	-7.09494	1.29411e-12	1.42763e-11
ENSG00000072422.17	6.85229	4.20637	0.592894	7.09464	1.29689e-12	1.42971e-11
ENSG00000163219.12	288.656	-2.64864	0.373511	-7.09119	1.32965e-12	1.46482e-11
ENSG00000148187.18	11.3663	-1.79993	0.253849	-7.09056	1.33574e-12	1.47051e-11
ENSG00000254006.5	4.14345	6.6849	0.943722	7.08354	1.40516e-12	1.54587e-11
ENSG00000169020.10	27.5618	5.79647	0.818635	7.08066	1.43472e-12	1.5773e-11
ENSG00000116747.13	63.8467	1.3749	0.194184	7.0804	1.43744e-12	1.5792e-11
ENSG00000145819.18	2.29222	4.45654	0.629438	7.08018	1.43963e-12	1.58053e-11
ENSG00000187837.4	16.5827	4.11835	0.581721	7.0796	1.44575e-12	1.58615e-11
ENSG00000023330.15	31.3851	3.14479	0.444244	7.07897	1.45233e-12	1.59227e-11
ENSG00000239672.8	8.21515	4.06888	0.574806	7.07871	1.45501e-12	1.59412e-11
ENSG00000114446.5	49.1989	-2.01668	0.285015	-7.07571	1.48687e-12	1.6279e-11
ENSG00000100368.14	4.09118	6.18389	0.874156	7.07413	1.50391e-12	1.64543e-11
ENSG00000122224.18	30.2352	-3.13681	0.443821	-7.06775	1.57471e-12	1.72172e-11
ENSG00000108474.17	11.7597	-1.92232	0.271998	-7.06739	1.57879e-12	1.725e-11
ENSG00000170638.10	10.0928	4.87386	0.6897	7.06664	1.58731e-12	1.73312e-11
ENSG00000247982.6	7.38804	-3.77528	0.534444	-7.06395	1.61839e-12	1.76585e-11
ENSG00000229998.8	5.41215	6.87528	0.974192	7.05742	1.69623e-12	1.84952e-11
ENSG00000162959.13	16.1231	1.66946	0.236635	7.05502	1.7258e-12	1.88048e-11
ENSG00000284936.2	9.64674	2.9705	0.421118	7.05386	1.74022e-12	1.89489e-11
ENSG00000100650.16	214.327	-1.48609	0.210693	-7.05332	1.74701e-12	1.90099e-11
ENSG00000134755.17	6.5049	6.12216	0.868705	7.04746	1.82213e-12	1.98138e-11
ENSG00000126003.7	18.2605	4.12579	0.585443	7.04729	1.82431e-12	1.98194e-11
ENSG00000090061.17	27.6259	4.31964	0.612956	7.04723	1.82513e-12	1.98194e-11
ENSG00000086102.19	81.7591	-2.36762	0.336007	-7.04632	1.83715e-12	1.99364e-11
ENSG00000134899.23	78.1082	-1.8078	0.256565	-7.04618	1.83902e-12	1.99431e-11
ENSG00000172005.11	2.81322	5.98035	0.848796	7.04569	1.84544e-12	1.99991e-11
ENSG00000116337.19	27.4742	6.96442	0.988714	7.04392	1.86902e-12	2.0241e-11
ENSG00000018869.17	4.50016	-2.57952	0.366223	-7.04357	1.87381e-12	2.02791e-11
ENSG00000229833.10	34.9035	6.43994	0.914327	7.04337	1.87648e-12	2.02942e-11
ENSG00000198242.14	340.144	4.53029	0.643242	7.04291	1.88264e-12	2.03471e-11
ENSG00000102893.16	117.366	-1.81619	0.257924	-7.04157	1.90092e-12	2.05307e-11
ENSG00000186871.7	18.0627	4.14941	0.589826	7.03497	1.99309e-12	2.15117e-11
ENSG00000276262.2	41.9592	-2.63402	0.374428	-7.0348	1.99554e-12	2.15235e-11
ENSG00000170085.18	12.1594	-3.00955	0.427922	-7.03294	2.02231e-12	2.17975e-11
ENSG00000100453.13	2.97954	5.77712	0.821585	7.03167	2.0407e-12	2.19809e-11
ENSG00000243215.7	8.98304	-3.51288	0.499662	-7.03052	2.05764e-12	2.21484e-11
ENSG00000185404.17	51.8236	-1.75751	0.250028	-7.02925	2.0764e-12	2.23353e-11
ENSG00000112486.17	99.9185	-3.73759	0.531734	-7.02907	2.07918e-12	2.23501e-11
ENSG00000151292.17	48.1397	-1.88028	0.26759	-7.02673	2.11435e-12	2.27129e-11
ENSG00000169139.12	87.8275	4.28642	0.610073	7.02608	2.12418e-12	2.28032e-11
ENSG00000029363.17	227.933	-1.40328	0.19979	-7.02377	2.15966e-12	2.31685e-11
ENSG00000131389.17	12.8337	3.9173	0.557811	7.02264	2.17718e-12	2.33407e-11
ENSG00000066336.12	20.3046	4.12766	0.587775	7.02252	2.17906e-12	2.33452e-11
ENSG00000151135.10	70.4573	-2.23676	0.318535	-7.02202	2.18686e-12	2.3413e-11
ENSG00000100632.11	16.4338	2.96391	0.422174	7.0206	2.20922e-12	2.36366e-11
ENSG00000196267.12	5.11938	-3.13817	0.447022	-7.02016	2.21615e-12	2.36949e-11
ENSG00000173207.13	20.7111	4.77228	0.679823	7.01988	2.22063e-12	2.3711e-11
ENSG00000168329.14	6.12969	6.14752	0.875724	7.01993	2.21972e-12	2.3711e-11
ENSG00000182240.16	21.6314	-2.5867	0.36849	-7.01974	2.22274e-12	2.37177e-11
ENSG00000169255.15	17.636	4.14665	0.590899	7.01752	2.25835e-12	2.40816e-11
ENSG00000135338.14	3.92072	4.90657	0.699343	7.01596	2.28374e-12	2.4336e-11
ENSG00000135469.14	5.94293	-3.48202	0.49631	-7.01582	2.28612e-12	2.43451e-11
ENSG00000130402.13	24.422	6.96132	0.992289	7.01542	2.29265e-12	2.43984e-11
ENSG00000118600.12	9.04748	-1.60366	0.22869	-7.01235	2.34356e-12	2.49236e-11
ENSG00000109943.9	1.89346	5.45862	0.778486	7.01183	2.35216e-12	2.49984e-11
ENSG00000171843.17	9.32051	3.32025	0.473567	7.01116	2.36352e-12	2.51023e-11
ENSG00000198382.9	93.7101	-2.91681	0.416127	-7.0094	2.39338e-12	2.53857e-11
ENSG00000168876.9	28.5506	-1.32507	0.18904	-7.00949	2.39184e-12	2.53857e-11
ENSG00000091651.9	5.38296	3.04639	0.434734	7.00747	2.42658e-12	2.57208e-11
ENSG00000104147.9	4.137	4.38866	0.626311	7.00716	2.43205e-12	2.57617e-11
ENSG00000204634.13	8.36881	5.06297	0.722571	7.00688	2.43684e-12	2.57953e-11
ENSG00000103495.14	7.92452	6.04061	0.862138	7.00655	2.44269e-12	2.58401e-11
ENSG00000106991.14	21.6527	8.67474	1.23848	7.00432	2.48182e-12	2.62366e-11
ENSG00000134744.14	52.973	-2.13683	0.305117	-7.00333	2.4995e-12	2.6406e-11
ENSG00000275136.4	9.77868	8.02575	1.14607	7.00282	2.5086e-12	2.64847e-11
ENSG00000135899.19	156.913	-1.82849	0.26112	-7.0025	2.5143e-12	2.65273e-11
ENSG00000196511.14	11.0256	-1.91554	0.273602	-7.00117	2.53832e-12	2.6763e-11
ENSG00000071205.12	2.55448	5.27893	0.754243	6.99898	2.57834e-12	2.7167e-11
ENSG00000060558.4	11.5529	8.24639	1.17839	6.99802	2.59598e-12	2.73348e-11
ENSG00000101347.10	22.1118	2.19521	0.313702	6.99775	2.60107e-12	2.73704e-11
ENSG00000174059.17	4.37141	5.09616	0.728372	6.99664	2.62175e-12	2.75698e-11
ENSG00000106327.13	12.2428	7.83879	1.12046	6.99604	2.63298e-12	2.76697e-11
ENSG00000147036.12	2.2176	5.70788	0.816212	6.99313	2.68816e-12	2.8231e-11
ENSG00000226264.10	11.6879	-3.33107	0.476362	-6.99272	2.69603e-12	2.8295e-11
ENSG00000151240.17	5.41121	-4.89388	0.699919	-6.99207	2.70861e-12	2.84084e-11
ENSG00000143977.14	35.1213	4.89261	0.69988	6.99064	2.73636e-12	2.86805e-11
ENSG00000135114.12	25.5518	6.3718	0.912321	6.98417	2.86553e-12	3.00147e-11
PB_novel_03872	5.36005	-4.05628	0.580944	-6.98222	2.90544e-12	3.04128e-11
ENSG00000106714.17	7.19531	5.55916	0.796505	6.97944	2.9635e-12	3.10003e-11
ENSG00000147533.17	39.9186	1.9056	0.273041	6.97916	2.96958e-12	3.10435e-11
ENSG00000184076.13	20.7575	4.60911	0.660453	6.97871	2.97898e-12	3.11214e-11
ENSG00000166352.17	26.4618	9.22068	1.32166	6.97659	3.02423e-12	3.15734e-11
ENSG00000101935.10	30.7851	3.23244	0.463405	6.9754	3.04992e-12	3.18208e-11
ENSG00000103342.13	24.9843	2.74009	0.39306	6.97117	3.14319e-12	3.27725e-11
ENSG00000136854.24	8.36886	5.01935	0.720034	6.97098	3.14731e-12	3.27941e-11
ENSG00000083750.13	12.4826	-2.31777	0.33253	-6.97009	3.16733e-12	3.29811e-11
ENSG00000132199.20	9.58847	2.88003	0.413226	6.96963	3.17776e-12	3.30682e-11
ENSG00000277443.3	6.55264	5.03756	0.722888	6.96867	3.19954e-12	3.32731e-11
ENSG00000143727.16	45.7748	2.28139	0.327423	6.9677	3.2217e-12	3.34818e-11
ENSG00000078018.20	3.10352	-4.28506	0.615022	-6.96733	3.23015e-12	3.35477e-11
ENSG00000141219.15	17.5579	-1.77424	0.254702	-6.96596	3.26169e-12	3.38532e-11
ENSG00000100902.11	32.8036	2.82017	0.405046	6.9626	3.34054e-12	3.46492e-11
ENSG00000100351.17	8.8884	5.34776	0.768505	6.95865	3.43554e-12	3.56114e-11
ENSG00000089169.15	4.30417	6.81327	0.979387	6.95667	3.48415e-12	3.60918e-11
PB_novel_50714	6.50046	7.42646	1.0677	6.95555	3.51191e-12	3.63558e-11
ENSG00000163636.11	30.0413	2.09742	0.301584	6.95468	3.53367e-12	3.65573e-11
ENSG00000251323.3	3.91526	-3.72277	0.535681	-6.9496	3.66311e-12	3.78719e-11
ENSG00000139289.13	9.04399	6.27479	0.903016	6.9487	3.68668e-12	3.80909e-11
ENSG00000117592.9	80.2814	1.36859	0.196984	6.94771	3.71255e-12	3.83334e-11
ENSG00000257698.2	4.25931	5.33787	0.768458	6.94621	3.7524e-12	3.87198e-11
ENSG00000197497.11	4.98139	-3.4137	0.491508	-6.94535	3.77513e-12	3.89292e-11
ENSG00000111261.14	6.11585	4.64447	0.668805	6.94444	3.79973e-12	3.91575e-11
ENSG00000048140.18	15.7142	6.60157	0.950657	6.94422	3.80569e-12	3.91937e-11
ENSG00000107669.18	25.8006	-1.89004	0.272334	-6.94015	3.9168e-12	4.0312e-11
ENSG00000163565.19	531.839	-1.99777	0.287902	-6.93909	3.94643e-12	4.05907e-11
ENSG00000176463.14	2.70197	5.85111	0.843741	6.93472	4.07016e-12	4.18364e-11
ENSG00000151176.8	11.355	6.04965	0.872428	6.93427	4.08329e-12	4.19444e-11
ENSG00000198604.11	89.1936	1.55744	0.224664	6.93231	4.14023e-12	4.25019e-11
PB_novel_19254	2.2725	-3.92201	0.565775	-6.9321	4.14649e-12	4.25388e-11
ENSG00000141522.12	39.7902	5.75081	0.829697	6.93122	4.17234e-12	4.27765e-11
ENSG00000188895.12	9.59833	2.27658	0.328634	6.92739	4.28679e-12	4.39217e-11
ENSG00000251002.8	15.2556	-3.6792	0.531289	-6.92505	4.35813e-12	4.4624e-11
ENSG00000100116.17	2.92657	5.20984	0.752382	6.92446	4.37628e-12	4.47811e-11
ENSG00000126267.11	14.8099	4.12371	0.595855	6.92065	4.49581e-12	4.59748e-11
ENSG00000112053.14	4.1218	6.60608	0.954675	6.91972	4.52529e-12	4.62466e-11
ENSG00000234284.7	5.19125	-2.61879	0.378534	-6.91824	4.57292e-12	4.67035e-11
ENSG00000143776.18	2.52643	4.57201	0.660896	6.91791	4.58362e-12	4.67828e-11
ENSG00000165233.18	4.32319	4.21051	0.608662	6.91766	4.59177e-12	4.6836e-11
ENSG00000248323.7	2.68392	5.85935	0.847028	6.91753	4.59573e-12	4.68465e-11
ENSG00000128512.23	2.87429	5.59867	0.809574	6.91558	4.65948e-12	4.7466e-11
ENSG00000127955.17	3.47238	5.07952	0.734723	6.91352	4.7278e-12	4.81312e-11
ENSG00000090674.16	13.0073	3.92437	0.567782	6.91175	4.78696e-12	4.87025e-11
ENSG00000156535.15	2.55495	5.41413	0.783582	6.90947	4.86463e-12	4.94612e-11
ENSG00000105851.11	34.2672	3.39764	0.491867	6.90765	4.9275e-12	5.00685e-11
ENSG00000115317.12	8.69119	2.33199	0.337847	6.9025	5.10948e-12	5.18846e-11
ENSG00000118655.7	24.5193	3.46101	0.501548	6.90065	5.1765e-12	5.25318e-11
ENSG00000055332.18	34.8375	1.92474	0.27894	6.90019	5.1934e-12	5.26698e-11
ENSG00000141198.16	2.78201	5.50329	0.797611	6.89972	5.21046e-12	5.28093e-11
ENSG00000143198.13	8.9331	2.47743	0.359071	6.89956	5.21629e-12	5.28348e-11
ENSG00000100226.16	28.618	6.05656	0.878218	6.89643	5.33274e-12	5.398e-11
ENSG00000151247.12	249.711	3.35786	0.486964	6.89549	5.36781e-12	5.43006e-11
ENSG00000241837.7	50.1494	3.69858	0.536636	6.89215	5.49543e-12	5.55564e-11
ENSG00000147604.14	1432.12	4.28309	0.621683	6.88951	5.59851e-12	5.65627e-11
ENSG00000220842.6	520.313	4.70821	0.683435	6.88904	5.61697e-12	5.67132e-11
ENSG00000185015.8	5.81334	-2.73998	0.397779	-6.8882	5.65032e-12	5.70139e-11
ENSG00000142634.13	3.62353	6.01251	0.873083	6.88652	5.71725e-12	5.76529e-11
ENSG00000185009.13	81.5099	-1.5463	0.224636	-6.88361	5.83553e-12	5.88084e-11
ENSG00000227502.3	3.92994	6.59312	0.957977	6.88234	5.88768e-12	5.92965e-11
ENSG00000114021.12	12.9081	-1.58637	0.230573	-6.88011	5.98081e-12	6.01586e-11
ENSG00000139354.11	1.65315	5.31374	0.772329	6.88014	5.97927e-12	6.01586e-11
ENSG00000079950.14	126.333	-1.97141	0.286547	-6.87989	5.99003e-12	6.02134e-11
ENSG00000005238.20	8.43634	6.83901	0.994117	6.87948	6.00697e-12	6.03457e-11
ENSG00000119922.10	25.0912	3.48172	0.50612	6.87924	6.01742e-12	6.03747e-11
ENSG00000085514.16	2.44496	5.79453	0.842321	6.87925	6.01703e-12	6.03747e-11
ENSG00000197601.13	43.3908	1.81822	0.264351	6.87804	6.06823e-12	6.08462e-11
ENSG00000121210.16	58.3726	-1.95105	0.283679	-6.87767	6.08382e-12	6.09643e-11
ENSG00000131401.11	22.8518	-3.67056	0.533862	-6.87549	6.17757e-12	6.18648e-11
ENSG00000118965.16	6.13821	-2.16441	0.314827	-6.87492	6.20233e-12	6.20738e-11
PB_novel_17123	10.2126	-2.84408	0.413786	-6.8733	6.27342e-12	6.27459e-11
ENSG00000010219.13	6.3404	-2.71903	0.395615	-6.8729	6.29082e-12	6.28806e-11
ENSG00000119878.6	17.3439	4.32298	0.629275	6.86977	6.4304e-12	6.42356e-11
ENSG00000185222.10	8.77896	7.64977	1.11359	6.86945	6.44482e-12	6.43393e-11
ENSG00000072786.13	20.1521	4.65615	0.677842	6.86908	6.46174e-12	6.4468e-11
ENSG00000035720.8	64.6031	-2.98891	0.435137	-6.8689	6.46974e-12	6.45075e-11
ENSG00000143627.19	10.7592	8.00659	1.16626	6.86518	6.64083e-12	6.6172e-11
ENSG00000183648.11	29.5977	5.88789	0.857897	6.86317	6.73502e-12	6.70687e-11
ENSG00000196923.14	11.2457	4.50268	0.656078	6.86303	6.74173e-12	6.70937e-11
ENSG00000164683.18	3.10686	5.66372	0.825632	6.85986	6.89275e-12	6.85539e-11
ENSG00000099194.6	64.5167	5.57641	0.813314	6.8564	7.06185e-12	7.0192e-11
ENSG00000187446.12	16.9216	4.15924	0.606649	6.85609	7.07704e-12	7.02992e-11
ENSG00000179094.16	7.44038	6.46842	0.94354	6.85548	7.10734e-12	7.05562e-11
ENSG00000152457.18	62.0405	-1.66725	0.243204	-6.85534	7.11434e-12	7.05818e-11
ENSG00000183323.13	3.24329	4.70964	0.687781	6.84759	7.51063e-12	7.44672e-11
ENSG00000285456.2	5.5825	6.73445	0.983825	6.84517	7.63852e-12	7.56882e-11
ENSG00000186431.19	9.47859	7.98159	1.16631	6.84343	7.73178e-12	7.65648e-11
ENSG00000111321.11	7.8285	5.89439	0.861348	6.84321	7.74353e-12	7.66336e-11
ENSG00000167325.15	246.816	2.26285	0.330679	6.84303	7.75345e-12	7.66842e-11
ENSG00000052749.14	11.2308	5.90861	0.863657	6.84138	7.84323e-12	7.75241e-11
ENSG00000119522.16	4.72896	2.8338	0.414222	6.84127	7.84942e-12	7.75373e-11
ENSG00000147586.10	12.4486	3.65162	0.533828	6.84045	7.89453e-12	7.79347e-11
ENSG00000274474.3	64.6007	1.72316	0.251929	6.83988	7.92593e-12	7.81963e-11
ENSG00000198363.18	14.7626	4.0741	0.595687	6.83934	7.95583e-12	7.84428e-11
ENSG00000159399.10	12.1849	5.44117	0.795583	6.83922	7.9628e-12	7.84631e-11
ENSG00000128915.12	76.8664	-1.70511	0.249339	-6.83852	8.00176e-12	7.87983e-11
ENSG00000281818.3	6.76831	5.01976	0.73436	6.83555	8.16912e-12	8.03969e-11
ENSG00000186532.12	5.60892	-3.33213	0.487556	-6.83435	8.23758e-12	8.10207e-11
ENSG00000266412.5	1034.96	2.21738	0.324506	6.83311	8.30959e-12	8.16786e-11
ENSG00000113810.16	234.975	2.31843	0.339306	6.83287	8.32307e-12	8.17607e-11
ENSG00000167562.13	21.0396	-1.54635	0.226322	-6.83254	8.34264e-12	8.19026e-11
ENSG00000138768.15	89.4771	-1.94303	0.284396	-6.83212	8.3671e-12	8.20418e-11
ENSG00000171401.15	5.62567	6.90286	1.01035	6.83215	8.36519e-12	8.20418e-11
ENSG00000177666.17	193.686	6.1308	0.897367	6.83198	8.37497e-12	8.20685e-11
ENSG00000152253.9	2.81243	5.66627	0.829491	6.83102	8.43103e-12	8.25672e-11
ENSG00000197044.11	9.52467	-2.76212	0.404373	-6.83062	8.45506e-12	8.27518e-11
ENSG00000018699.13	67.9215	-1.43483	0.210074	-6.8301	8.48531e-12	8.2997e-11
ENSG00000242715.8	2.7345	5.52675	0.809239	6.82956	8.51778e-12	8.32635e-11
ENSG00000251247.11	9.56839	-1.72668	0.252895	-6.82767	8.63027e-12	8.43115e-11
ENSG00000109062.12	8.23033	4.30063	0.629938	6.82707	8.66679e-12	8.46165e-11
ENSG00000171817.17	3.2721	-3.33676	0.488761	-6.82696	8.67301e-12	8.46255e-11
ENSG00000141380.14	124.544	-1.90908	0.279652	-6.82662	8.69362e-12	8.47747e-11
ENSG00000123643.13	2.85723	3.07438	0.450413	6.82568	8.75108e-12	8.52829e-11
ENSG00000113812.14	23.5063	-1.38271	0.202636	-6.82361	8.87793e-12	8.64664e-11
ENSG00000168671.10	3.44963	6.38447	0.935788	6.82256	8.9434e-12	8.70509e-11
ENSG00000162496.9	2.79944	5.81334	0.852098	6.82238	8.95422e-12	8.71031e-11
PB_novel_14150	2.86704	-3.27357	0.479931	-6.82092	9.04565e-12	8.79389e-11
ENSG00000171109.19	72.0893	-1.24968	0.183223	-6.82056	9.06866e-12	8.81089e-11
ENSG00000127540.12	27.0429	2.96322	0.434487	6.82004	9.1015e-12	8.83742e-11
ENSG00000275564.4	8.29634	7.78898	1.1422	6.8193	9.14879e-12	8.87794e-11
ENSG00000275835.5	10.1682	-1.88689	0.276706	-6.8191	9.16114e-12	8.882e-11
ENSG00000101132.10	14.3046	4.3391	0.63632	6.81906	9.1641e-12	8.882e-11
ENSG00000224397.7	4.12112	6.54814	0.960502	6.81741	9.26973e-12	8.97892e-11
ENSG00000179163.12	23.6096	2.42006	0.355058	6.81596	9.36374e-12	9.06449e-11
ENSG00000167513.9	19.6097	8.39054	1.23119	6.81496	9.4291e-12	9.12222e-11
ENSG00000184752.13	9.62337	5.6776	0.833213	6.8141	9.48539e-12	9.17112e-11
ENSG00000156411.10	53.7763	4.1655	0.611696	6.80974	9.77736e-12	9.4477e-11
ENSG00000231389.7	34.8428	-2.69955	0.396434	-6.80958	9.78831e-12	9.45256e-11
ENSG00000163453.11	2.82191	6.22207	0.913787	6.8091	9.82136e-12	9.47874e-11
ENSG00000180071.20	3.91788	6.6217	0.972854	6.80646	1.00027e-11	9.64796e-11
ENSG00000125971.17	9.58606	2.79724	0.411025	6.80553	1.00681e-11	9.70516e-11
ENSG00000167994.13	17.1986	8.48911	1.24763	6.8042	1.01611e-11	9.78883e-11
ENSG00000122299.12	84.8514	-2.09726	0.308251	-6.80373	1.01943e-11	9.81492e-11
ENSG00000171476.22	4.52726	6.20877	0.912873	6.80135	1.03643e-11	9.97256e-11
ENSG00000164068.16	20.6322	8.02317	1.17976	6.80067	1.04134e-11	1.00138e-10
ENSG00000180185.11	5.28174	2.45514	0.361118	6.7987	1.05565e-11	1.01453e-10
ENSG00000034713.8	27.1752	3.49047	0.513532	6.79698	1.06836e-11	1.02613e-10
ENSG00000049759.19	6.84107	3.17063	0.466621	6.79486	1.0842e-11	1.04071e-10
ENSG00000101843.19	49.6914	3.30837	0.486906	6.79468	1.08555e-11	1.04139e-10
ENSG00000029993.15	35.8354	2.41573	0.355611	6.79318	1.09691e-11	1.05165e-10
ENSG00000162676.12	6.17767	6.32264	0.931033	6.791	1.1136e-11	1.06701e-10
ENSG00000164116.17	4.98777	5.16751	0.761035	6.79011	1.12049e-11	1.07297e-10
ENSG00000131355.15	3.96248	6.723	0.990497	6.7875	1.14094e-11	1.09189e-10
ENSG00000145431.11	1.17858	4.98074	0.734059	6.78521	1.15917e-11	1.10868e-10
ENSG00000164070.12	11.6508	6.14009	0.906079	6.77656	1.23075e-11	1.17644e-10
ENSG00000237649.8	3.27236	5.5472	0.8187	6.77562	1.23872e-11	1.18335e-10
ENSG00000104312.8	37.4073	2.06317	0.304533	6.77486	1.24528e-11	1.1889e-10
ENSG00000178053.20	1.53568	4.53096	0.668857	6.77418	1.25115e-11	1.19379e-10
ENSG00000091409.15	6.60305	5.22507	0.771516	6.77246	1.26607e-11	1.2073e-10
ENSG00000101336.17	20.4556	4.91734	0.726233	6.77102	1.27874e-11	1.21866e-10
ENSG00000141905.19	3.855	6.02406	0.889699	6.77089	1.27991e-11	1.21904e-10
ENSG00000087903.13	5.57902	5.21269	0.770017	6.76958	1.29158e-11	1.22943e-10
ENSG00000183520.12	49.5953	3.52002	0.5201	6.76797	1.306e-11	1.24241e-10
ENSG00000170296.10	28.7547	2.00711	0.296593	6.76722	1.3128e-11	1.24739e-10
ENSG00000197498.13	32.2175	4.00876	0.592379	6.76723	1.31274e-11	1.24739e-10
ENSG00000147044.22	1.9274	-3.13336	0.463251	-6.76385	1.34374e-11	1.27604e-10
ENSG00000172239.14	32.4765	-0.945775	0.139863	-6.76216	1.35953e-11	1.29026e-10
ENSG00000147162.14	79.604	-2.0842	0.308241	-6.7616	1.36477e-11	1.29446e-10
ENSG00000137364.5	24.993	3.35585	0.496428	6.75999	1.38003e-11	1.30816e-10
ENSG00000177337.8	3.62114	-2.7828	0.411732	-6.75876	1.39178e-11	1.31851e-10
ENSG00000109736.15	17.1644	5.07998	0.751649	6.75845	1.39477e-11	1.32057e-10
ENSG00000167785.9	18.4288	-2.84287	0.420661	-6.7581	1.39815e-11	1.32229e-10
ENSG00000173145.11	41.5095	-2.19527	0.324836	-6.75809	1.39825e-11	1.32229e-10
ENSG00000236320.4	1.75293	5.21821	0.772253	6.75712	1.40757e-11	1.33032e-10
ENSG00000231247.8	3.91047	6.01852	0.890805	6.75628	1.41582e-11	1.33732e-10
ENSG00000204472.13	8.09301	7.69169	1.13887	6.7538	1.44021e-11	1.35955e-10
ENSG00000118518.16	20.4493	-1.40446	0.207989	-6.75258	1.45238e-11	1.37024e-10
ENSG00000012124.17	70.6755	-4.31363	0.638955	-6.75106	1.46767e-11	1.38384e-10
ENSG00000160211.19	52.6912	5.10133	0.755736	6.75015	1.4769e-11	1.39172e-10
ENSG00000028137.19	38.7611	6.12241	0.907145	6.7491	1.48767e-11	1.40104e-10
ENSG00000169764.16	82.422	1.83324	0.271656	6.74838	1.49503e-11	1.40715e-10
ENSG00000164338.10	32.9692	-1.41059	0.209038	-6.74799	1.4991e-11	1.40932e-10
ENSG00000165929.13	5.19998	5.29481	0.78464	6.74807	1.49822e-11	1.40932e-10
ENSG00000166825.15	17.141	6.94173	1.02907	6.74566	1.52335e-11	1.43126e-10
ENSG00000183597.16	31.5196	3.19329	0.47342	6.74514	1.52883e-11	1.43557e-10
ENSG00000123191.16	1.88107	5.02948	0.745751	6.74418	1.53896e-11	1.44423e-10
ENSG00000136146.15	20.0252	1.59568	0.236613	6.74385	1.54247e-11	1.44583e-10
ENSG00000160014.17	52.1934	2.76967	0.410694	6.74387	1.54221e-11	1.44583e-10
ENSG00000276618.4	37.7264	-1.66924	0.247532	-6.74351	1.546e-11	1.44829e-10
ENSG00000134375.11	28.9372	2.42678	0.359901	6.74289	1.55262e-11	1.45363e-10
ENSG00000143183.18	55.2439	2.85645	0.423785	6.74033	1.58023e-11	1.47862e-10
ENSG00000139233.7	9.31257	2.54204	0.377152	6.7401	1.5828e-11	1.48015e-10
ENSG00000177311.11	11.2357	-2.78067	0.412625	-6.73897	1.59513e-11	1.49081e-10
ENSG00000140092.14	2.36332	5.80595	0.861688	6.73788	1.60716e-11	1.50117e-10
ENSG00000117632.23	291.13	3.86714	0.574054	6.73656	1.62186e-11	1.51402e-10
ENSG00000131171.13	390.178	2.89563	0.429881	6.73588	1.62939e-11	1.52016e-10
ENSG00000215712.11	14.8905	2.67221	0.396759	6.73509	1.63826e-11	1.52754e-10
ENSG00000140968.11	86.2337	-3.11582	0.462721	-6.73368	1.65423e-11	1.54153e-10
ENSG00000007968.7	4.87125	6.17193	0.916628	6.7333	1.65859e-11	1.54469e-10
ENSG00000230989.7	60.4374	2.29906	0.34159	6.73046	1.69128e-11	1.57422e-10
ENSG00000087086.15	95.4065	2.65723	0.394822	6.73021	1.6942e-11	1.57602e-10
ENSG00000065135.12	153.024	1.55888	0.231695	6.72817	1.71812e-11	1.59734e-10
ENSG00000184743.13	12.6953	1.59308	0.236825	6.72683	1.73402e-11	1.61119e-10
ENSG00000288673.1	3.6027	5.93275	0.881971	6.7267	1.73555e-11	1.61166e-10
ENSG00000198015.14	121.461	3.30941	0.492162	6.72423	1.76527e-11	1.63831e-10
ENSG00000172809.13	187.05	3.8176	0.567864	6.72274	1.7834e-11	1.65418e-10
ENSG00000140006.11	20.488	-1.56792	0.233292	-6.72082	1.80703e-11	1.67512e-10
ENSG00000178105.11	55.2248	-1.68148	0.250205	-6.72038	1.81251e-11	1.67923e-10
ENSG00000136152.15	38.3212	-1.73182	0.257725	-6.71962	1.82197e-11	1.68702e-10
ENSG00000141562.18	23.4195	2.26447	0.33703	6.71889	1.83108e-11	1.69303e-10
ENSG00000107521.19	27.0848	3.36531	0.500876	6.71885	1.83165e-11	1.69303e-10
ENSG00000127184.13	63.843	4.12449	0.613863	6.71891	1.83092e-11	1.69303e-10
ENSG00000163947.12	137.025	-2.86556	0.426523	-6.71843	1.83698e-11	1.69697e-10
ENSG00000168958.20	48.1011	-0.944028	0.140528	-6.71774	1.84567e-11	1.70402e-10
ENSG00000184305.15	2.92166	4.81281	0.716599	6.71618	1.86551e-11	1.72133e-10
ENSG00000131495.9	14.7771	3.1884	0.474917	6.71359	1.89894e-11	1.75117e-10
ENSG00000130766.5	5.33733	6.48028	0.965713	6.71036	1.94145e-11	1.78934e-10
ENSG00000174796.12	10.0878	-1.51884	0.226357	-6.70992	1.94725e-11	1.79365e-10
ENSG00000163349.22	7.58932	2.25319	0.335847	6.70899	1.95981e-11	1.80418e-10
ENSG00000241106.8	15.1417	-4.86157	0.724729	-6.70812	1.97146e-11	1.81386e-10
ENSG00000213799.13	18.6704	-1.91294	0.285212	-6.70707	1.98574e-11	1.82594e-10
ENSG00000023041.11	117.545	-1.31837	0.196705	-6.70224	2.05246e-11	1.88621e-10
ENSG00000204397.8	24.8837	3.79564	0.566419	6.7011	2.0685e-11	1.89986e-10
ENSG00000138795.10	86.2685	-2.53918	0.379023	-6.69929	2.09428e-11	1.92243e-10
ENSG00000109787.13	181.014	3.53783	0.528166	6.69832	2.10825e-11	1.93414e-10
ENSG00000137959.16	38.3472	4.4568	0.665477	6.69715	2.12521e-11	1.94858e-10
ENSG00000231607.12	34.6587	3.77231	0.563302	6.69678	2.13059e-11	1.95239e-10
ENSG00000224478.3	2.33565	-3.72914	0.557546	-6.68848	2.25494e-11	2.06515e-10
ENSG00000167363.14	2.69901	5.80503	0.867952	6.6882	2.2594e-11	2.06805e-10
ENSG00000135845.10	33.3228	1.99326	0.298035	6.68802	2.2621e-11	2.06934e-10
ENSG00000012660.14	302.354	-1.40054	0.209457	-6.68653	2.28523e-11	2.0893e-10
PB_novel_49853	2.49007	5.90773	0.883706	6.68517	2.3065e-11	2.10754e-10
ENSG00000153551.14	2.9125	3.78859	0.566827	6.68386	2.32735e-11	2.12537e-10
ENSG00000196961.13	17.9437	6.81219	1.01932	6.68309	2.33949e-11	2.13524e-10
PB_novel_19252	1.42041	-3.39023	0.507354	-6.68219	2.35402e-11	2.14727e-10
ENSG00000278046.4	3.92616	6.68362	1.00053	6.68007	2.38822e-11	2.17723e-10
ENSG00000241674.8	12.7116	-3.6717	0.549731	-6.67908	2.40441e-11	2.18948e-10
ENSG00000278415.4	4.4767	6.81357	1.02013	6.6791	2.40422e-11	2.18948e-10
ENSG00000148908.15	14.0798	3.1747	0.475355	6.6786	2.41233e-11	2.19544e-10
PB_novel_18178	2.0909	-3.15607	0.472584	-6.67833	2.41681e-11	2.19826e-10
ENSG00000224259.7	7.5038	7.59892	1.13793	6.67786	2.42456e-11	2.20406e-10
ENSG00000167555.14	5.44398	-2.69667	0.403973	-6.67537	2.46601e-11	2.24046e-10
ENSG00000065911.13	42.786	1.68094	0.251826	6.67502	2.47202e-11	2.24464e-10
ENSG00000172493.22	10.4781	2.46566	0.369416	6.67448	2.48119e-11	2.25169e-10
ENSG00000102174.9	13.0271	-5.96953	0.894405	-6.67431	2.48398e-11	2.25294e-10
ENSG00000288445.2	22.709	-2.02071	0.302868	-6.67194	2.52451e-11	2.2884e-10
ENSG00000175727.14	4.34504	4.51491	0.676815	6.67082	2.54376e-11	2.30454e-10
ENSG00000101844.18	38.7487	2.20713	0.331039	6.66727	2.60601e-11	2.3596e-10
ENSG00000148344.11	4.88669	6.75706	1.01349	6.66715	2.60818e-11	2.36022e-10
ENSG00000153214.11	36.3858	-2.03939	0.305955	-6.66566	2.63487e-11	2.38303e-10
ENSG00000165359.16	35.14	-1.80196	0.270456	-6.66266	2.68913e-11	2.43072e-10
ENSG00000092531.10	167.31	-1.4083	0.211414	-6.66131	2.71402e-11	2.45183e-10
ENSG00000101255.11	22.5342	4.70297	0.70604	6.66105	2.71875e-11	2.45472e-10
ENSG00000170315.14	321.144	2.77754	0.417119	6.65888	2.75926e-11	2.48988e-10
PB_novel_03692	3.87747	5.55479	0.834376	6.65741	2.7869e-11	2.51341e-10
ENSG00000135315.12	23.3327	-1.95819	0.294187	-6.65627	2.80866e-11	2.5316e-10
ENSG00000147576.17	5.14495	-2.40389	0.361153	-6.65614	2.81114e-11	2.53241e-10
ENSG00000152219.5	29.5786	-1.5244	0.229031	-6.65586	2.81642e-11	2.53573e-10
ENSG00000196363.9	11.7634	3.69559	0.555329	6.65476	2.83758e-11	2.55334e-10
ENSG00000146373.16	2.22255	4.82053	0.724567	6.65298	2.87208e-11	2.58293e-10
ENSG00000179241.13	14.3739	5.45426	0.820815	6.64493	3.03354e-11	2.7266e-10
ENSG00000171408.14	2.88759	-4.30184	0.647435	-6.64444	3.04376e-11	2.73424e-10
ENSG00000186350.12	3.95384	5.40518	0.813577	6.64372	3.05854e-11	2.74598e-10
ENSG00000134352.20	6.33664	2.52629	0.380371	6.64163	3.10231e-11	2.78371e-10
PB_novel_15181	7.87255	-2.85735	0.430411	-6.63867	3.16534e-11	2.83867e-10
ENSG00000168038.11	6.22608	-1.77225	0.26707	-6.63588	3.22575e-11	2.89122e-10
ENSG00000132388.12	51.0291	-1.70437	0.256997	-6.63188	3.31442e-11	2.96903e-10
ENSG00000165389.7	29.4643	3.82033	0.576124	6.63108	3.33229e-11	2.98336e-10
ENSG00000276291.5	21.5471	-1.48815	0.224459	-6.62994	3.35822e-11	3.00321e-10
ENSG00000235588.8	7.96221	7.66717	1.15644	6.62997	3.35764e-11	3.00321e-10
ENSG00000197756.10	366.274	3.6682	0.553517	6.62708	3.42383e-11	3.06017e-10
ENSG00000173875.14	68.8066	-1.61324	0.243446	-6.6267	3.43279e-11	3.06646e-10
ENSG00000099251.14	4.51712	-2.88495	0.435375	-6.62635	3.4408e-11	3.0719e-10
ENSG00000089220.5	59.8762	-2.10578	0.3178	-6.62613	3.44596e-11	3.07478e-10
ENSG00000275269.4	9.4524	7.83309	1.18238	6.62486	3.47574e-11	3.09963e-10
ENSG00000235915.8	4.55018	6.53018	0.98595	6.62323	3.51426e-11	3.13222e-10
ENSG00000221983.8	215.408	2.9426	0.444318	6.62272	3.52642e-11	3.14131e-10
ENSG00000074695.6	44.8555	-1.66153	0.250937	-6.62128	3.56107e-11	3.17041e-10
ENSG00000130770.18	43.0065	3.29857	0.498228	6.62061	3.57726e-11	3.18304e-10
ENSG00000233276.7	178.382	3.40105	0.513755	6.61998	3.59248e-11	3.19481e-10
ENSG00000235025.8	2.03518	5.56403	0.840534	6.61963	3.6009e-11	3.20051e-10
ENSG00000128487.17	26.8683	2.74298	0.414385	6.6194	3.60655e-11	3.20374e-10
ENSG00000197471.12	24.8798	4.64388	0.701568	6.61928	3.60949e-11	3.20457e-10
ENSG00000144647.6	6.02832	7.10528	1.07352	6.61868	3.62429e-11	3.21593e-10
ENSG00000188761.13	4.01558	5.52564	0.83527	6.61539	3.70571e-11	3.28635e-10
ENSG00000139514.13	4.92287	4.27595	0.646396	6.61505	3.7142e-11	3.29204e-10
ENSG00000134779.15	26.9508	1.70442	0.257743	6.61285	3.76984e-11	3.33951e-10
ENSG00000034152.19	247.617	5.90928	0.893723	6.61198	3.79204e-11	3.35731e-10
ENSG00000229417.1	1.55686	-3.44222	0.520806	-6.60941	3.85865e-11	3.41439e-10
ENSG00000185630.19	2.28105	5.60194	0.84781	6.60754	3.90752e-11	3.45572e-10
ENSG00000147400.10	10.1363	3.50917	0.531133	6.60697	3.92278e-11	3.4673e-10
ENSG00000104774.13	71.2581	6.05552	0.916568	6.60673	3.92892e-11	3.4708e-10
ENSG00000100330.16	18.2118	2.53558	0.38386	6.60548	3.96222e-11	3.49828e-10
ENSG00000125995.16	14.1417	3.98567	0.603423	6.6051	3.97236e-11	3.50529e-10
ENSG00000165629.20	46.1981	3.53195	0.53492	6.60276	4.03561e-11	3.55914e-10
ENSG00000158290.18	86.758	-2.07448	0.314228	-6.60183	4.06104e-11	3.57959e-10
ENSG00000079257.8	14.2621	4.58029	0.693807	6.60168	4.06538e-11	3.58144e-10
ENSG00000125691.14	299.901	3.55891	0.539314	6.59896	4.14051e-11	3.64562e-10
ENSG00000206428.9	7.77844	7.62379	1.15534	6.59876	4.14609e-11	3.64851e-10
ENSG00000272994.1	5.23373	-2.10378	0.318824	-6.59856	4.1517e-11	3.65144e-10
ENSG00000135090.14	142.673	-1.6687	0.252905	-6.59812	4.16412e-11	3.66034e-10
ENSG00000285933.1	2.78564	5.56396	0.843301	6.59784	4.17201e-11	3.66526e-10
PB_novel_19429	2.25217	-3.85239	0.583973	-6.59686	4.19961e-11	3.68281e-10
ENSG00000103035.11	85.2899	2.11214	0.320176	6.59681	4.20097e-11	3.68281e-10
ENSG00000285250.2	4.34877	3.07329	0.465876	6.5968	4.20121e-11	3.68281e-10
ENSG00000065518.8	26.236	5.50898	0.835086	6.5969	4.19833e-11	3.68281e-10
ENSG00000073754.6	2.69163	6.10874	0.926164	6.59575	4.23113e-11	3.707e-10
ENSG00000105993.15	58.904	1.61947	0.245546	6.59538	4.2417e-11	3.71422e-10
ENSG00000051341.14	1.89387	4.52792	0.686973	6.59112	4.36509e-11	3.82017e-10
ENSG00000118971.9	4.91097	3.13066	0.475081	6.58974	4.40608e-11	3.85393e-10
ENSG00000156831.8	9.69432	2.29358	0.348087	6.58909	4.42531e-11	3.86863e-10
ENSG00000141552.18	3.41507	4.63569	0.703787	6.58678	4.49474e-11	3.92718e-10
ENSG00000160789.22	118.647	6.12527	0.929957	6.58662	4.49943e-11	3.92912e-10
ENSG00000213741.11	640.499	3.78547	0.574884	6.58475	4.55663e-11	3.97597e-10
PB_novel_08332	1.35639	4.83183	0.733796	6.5847	4.55806e-11	3.97597e-10
ENSG00000166704.11	9.63398	-2.30211	0.349692	-6.58324	4.60306e-11	4.01304e-10
ENSG00000198131.14	17.5547	-1.60676	0.244112	-6.58206	4.6397e-11	4.04276e-10
ENSG00000116752.6	86.4123	3.41215	0.518411	6.58193	4.64373e-11	4.04407e-10
ENSG00000132963.8	30.3626	3.58359	0.544697	6.57905	4.73466e-11	4.12101e-10
ENSG00000161405.17	9.04541	-3.05923	0.465134	-6.57709	4.79736e-11	4.17331e-10
ENSG00000273715.4	5.08476	6.24426	0.949643	6.57538	4.85302e-11	4.21943e-10
ENSG00000113749.7	3.35003	6.46013	0.982716	6.57375	4.90652e-11	4.26362e-10
ENSG00000049245.13	113.874	1.55517	0.236608	6.57278	4.93853e-11	4.28716e-10
ENSG00000278615.5	9.41976	5.79932	0.882326	6.57276	4.93897e-11	4.28716e-10
ENSG00000158717.11	17.2179	4.57153	0.695602	6.57204	4.96302e-11	4.30569e-10
ENSG00000135070.15	56.8295	1.77477	0.27012	6.57029	5.0219e-11	4.3544e-10
ENSG00000245910.8	54.7903	4.15209	0.632073	6.56901	5.06513e-11	4.38951e-10
ENSG00000122490.19	3.54146	5.65216	0.860608	6.56764	5.11198e-11	4.4277e-10
ENSG00000114473.14	5.38453	-1.85095	0.281999	-6.56367	5.24993e-11	4.54472e-10
ENSG00000135164.19	65.5917	-1.89508	0.288826	-6.56133	5.33295e-11	4.61409e-10
ENSG00000235985.7	8.12886	7.56306	1.15273	6.561	5.34478e-11	4.62181e-10
ENSG00000176170.14	3.38449	6.26453	0.95491	6.56034	5.3686e-11	4.6399e-10
ENSG00000179542.16	3.16967	6.35981	0.969468	6.56011	5.37684e-11	4.64451e-10
ENSG00000162852.14	45.9489	-1.73093	0.263871	-6.55976	5.38948e-11	4.65291e-10
ENSG00000174946.7	5.73381	6.3134	0.962462	6.55964	5.39392e-11	4.65423e-10
ENSG00000257221.4	2.0457	-3.39314	0.517395	-6.55813	5.44881e-11	4.69904e-10
ENSG00000115163.15	2.06597	4.71085	0.718361	6.55778	5.46161e-11	4.70754e-10
ENSG00000249709.8	27.9489	-1.69174	0.258217	-6.55162	5.69176e-11	4.90327e-10
ENSG00000108518.8	81.0395	2.21104	0.337606	6.54916	5.78601e-11	4.98177e-10
ENSG00000132274.16	368.08	-2.28793	0.349414	-6.5479	5.83498e-11	5.01852e-10
ENSG00000162063.13	9.14754	5.92678	0.905136	6.54795	5.83326e-11	5.01852e-10
ENSG00000147852.16	24.6988	5.48486	0.837956	6.54552	5.92893e-11	5.09658e-10
ENSG00000064703.12	47.5965	-1.71639	0.262333	-6.5428	6.03785e-11	5.18741e-10
ENSG00000064199.7	2.34174	4.65849	0.712105	6.54186	6.07592e-11	5.21732e-10
ENSG00000177954.14	382.1	4.66854	0.713912	6.53938	6.17743e-11	5.30163e-10
ENSG00000137478.15	52.5637	-2.86659	0.438483	-6.53753	6.25448e-11	5.36487e-10
ENSG00000168476.12	11.3674	5.29714	0.810411	6.53636	6.30355e-11	5.40406e-10
ENSG00000110031.13	57.1137	-2.05031	0.313772	-6.53439	6.38687e-11	5.46961e-10
ENSG00000197858.11	6.29719	6.54178	1.00112	6.53443	6.38506e-11	5.46961e-10
ENSG00000105701.16	46.5371	5.46985	0.838092	6.52655	6.7303e-11	5.76063e-10
ENSG00000164045.12	2.88576	4.57453	0.700958	6.52612	6.74963e-11	5.77408e-10
ENSG00000027075.15	20.4208	4.42403	0.677916	6.52593	6.75822e-11	5.77833e-10
ENSG00000139597.18	20.7914	-1.27097	0.194797	-6.5246	6.81811e-11	5.8233e-10
ENSG00000182774.13	280.798	4.1089	0.629754	6.52461	6.81802e-11	5.8233e-10
ENSG00000175352.11	3.87833	5.84432	0.895792	6.52419	6.83687e-11	5.8362e-10
ENSG00000133321.11	2.56597	4.06422	0.623029	6.52331	6.87705e-11	5.86736e-10
ENSG00000114737.16	4.7461	6.53659	1.00255	6.51998	7.0316e-11	5.99601e-10
ENSG00000149534.9	2.47958	5.48309	0.841377	6.51681	7.18205e-11	6.11873e-10
ENSG00000090020.11	4.20064	6.16275	0.945673	6.51678	7.18317e-11	6.11873e-10
ENSG00000240505.9	3.89792	-4.21677	0.647137	-6.51605	7.21849e-11	6.14553e-10
ENSG00000137101.13	11.3898	-2.88713	0.443124	-6.5154	7.24985e-11	6.16894e-10
ENSG00000136699.19	18.6446	5.51302	0.84618	6.51519	7.2596e-11	6.17394e-10
ENSG00000136938.9	157.854	1.59115	0.244315	6.51272	7.38032e-11	6.27327e-10
ENSG00000135926.15	110.029	3.25484	0.50001	6.50955	7.53768e-11	6.40362e-10
ENSG00000281500.3	10.6834	4.87555	0.749033	6.50913	7.55877e-11	6.41812e-10
ENSG00000278229.2	275.251	4.06428	0.624933	6.50355	7.84438e-11	6.65709e-10
ENSG00000142546.14	16.3656	-2.41935	0.372046	-6.50282	7.88284e-11	6.68617e-10
ENSG00000235568.7	5.28091	7.12466	1.09634	6.49858	8.10799e-11	6.87349e-10
ENSG00000177917.11	15.5018	1.64353	0.252952	6.49741	8.17123e-11	6.92343e-10
PB_novel_47468	9.72933	7.20606	1.10928	6.49614	8.24062e-11	6.97852e-10
PB_novel_17554	3.16966	6.17377	0.950489	6.49537	8.28322e-11	7.01087e-10
ENSG00000225873.4	1.29379	4.68787	0.722044	6.4925	8.44257e-11	7.14195e-10
ENSG00000257315.3	5.36182	-2.38589	0.367546	-6.49141	8.50377e-11	7.18992e-10
ENSG00000197818.12	8.69685	2.80951	0.432813	6.49126	8.51211e-11	7.19316e-10
ENSG00000099250.18	2.05107	5.74316	0.884809	6.49085	8.53561e-11	7.2092e-10
ENSG00000175489.10	18.9232	5.76511	0.888467	6.48883	8.65066e-11	7.30251e-10
ENSG00000110665.12	6.18472	4.8295	0.74429	6.48873	8.65609e-11	7.30323e-10
ENSG00000172428.11	11.4979	4.65437	0.717311	6.48864	8.66167e-11	7.30408e-10
ENSG00000214114.9	21.2582	2.47037	0.380763	6.48794	8.70196e-11	7.32316e-10
ENSG00000159346.13	189.886	2.86052	0.440899	6.48793	8.70265e-11	7.32316e-10
ENSG00000125912.11	7.77567	6.42685	0.990566	6.48806	8.69515e-11	7.32316e-10
ENSG00000111537.5	7.56845	7.29963	1.12509	6.48801	8.69761e-11	7.32316e-10
ENSG00000152061.23	154.467	-1.55744	0.24008	-6.48715	8.74778e-11	7.35726e-10
ENSG00000159147.18	11.2793	3.14744	0.48531	6.48541	8.84883e-11	7.43833e-10
ENSG00000234545.8	50.7891	1.29725	0.200099	6.48306	8.9878e-11	7.55117e-10
ENSG00000140287.11	4.89979	5.97276	0.921398	6.48229	9.03436e-11	7.5863e-10
ENSG00000163827.13	2.23644	5.70206	0.879924	6.48017	9.16183e-11	7.68929e-10
ENSG00000127564.17	7.9904	7.13277	1.10076	6.47986	9.18064e-11	7.70103e-10
ENSG00000226521.7	1.55608	-3.78223	0.583734	-6.47938	9.20992e-11	7.72153e-10
ENSG00000101856.10	31.703	1.36323	0.210411	6.4789	9.23951e-11	7.74228e-10
ENSG00000262145.5	3.55763	4.05101	0.625362	6.47787	9.30274e-11	7.79117e-10
ENSG00000162642.14	16.6318	2.39807	0.37033	6.47548	9.45079e-11	7.91101e-10
ENSG00000187231.14	36.7137	-1.82868	0.282409	-6.47529	9.46269e-11	7.91682e-10
ENSG00000164924.18	2588.78	-1.41322	0.21829	-6.47406	9.54053e-11	7.97776e-10
ENSG00000181938.14	9.54946	3.01496	0.465771	6.47307	9.60333e-11	8.02607e-10
ENSG00000170191.5	9.64009	1.77734	0.274633	6.4717	9.69082e-11	8.09496e-10
ENSG00000131941.8	6.50462	-4.30447	0.665538	-6.46766	9.95351e-11	8.30135e-10
ENSG00000130724.9	8.26208	2.48068	0.383547	6.46772	9.94914e-11	8.30135e-10
ENSG00000166896.9	2.71958	4.56867	0.706378	6.46775	9.94729e-11	8.30135e-10
ENSG00000104903.5	4.2508	5.16128	0.798054	6.46733	9.97479e-11	8.31476e-10
ENSG00000164180.14	5.60708	-2.10728	0.325864	-6.46673	1.00144e-10	8.34344e-10
ENSG00000004534.15	63.5929	-1.70058	0.263087	-6.46392	1.02023e-10	8.4955e-10
ENSG00000169021.6	11.2695	1.58077	0.244559	6.46377	1.02125e-10	8.49961e-10
ENSG00000188312.14	3.85797	3.97251	0.61463	6.46325	1.02479e-10	8.52458e-10
ENSG00000145425.10	3193.2	3.52031	0.544674	6.46315	1.02547e-10	8.52583e-10
ENSG00000132541.11	13.5656	4.55912	0.705878	6.45879	1.05545e-10	8.77054e-10
ENSG00000169564.7	175.241	3.69345	0.571953	6.45761	1.06368e-10	8.83147e-10
ENSG00000171700.14	9.46248	4.26318	0.660182	6.45758	1.06389e-10	8.83147e-10
ENSG00000276985.4	8.8986	7.88453	1.221	6.45745	1.06479e-10	8.83429e-10
ENSG00000253276.4	2.54879	5.40363	0.836832	6.45724	1.06632e-10	8.84241e-10
ENSG00000268163.1	1.45695	-3.06142	0.474295	-6.45467	1.08456e-10	8.98905e-10
ENSG00000165416.15	46.484	2.97931	0.461592	6.45443	1.0863e-10	8.99875e-10
ENSG00000079308.19	19.3304	8.4968	1.31664	6.45341	1.09364e-10	9.05489e-10
PB_novel_01460	3.19337	6.06294	0.939569	6.45289	1.09735e-10	9.08088e-10
ENSG00000197989.14	13.3104	-3.09395	0.479779	-6.4487	1.12816e-10	9.33103e-10
ENSG00000107562.16	5.18949	7.12531	1.10604	6.44218	1.17772e-10	9.73582e-10
ENSG00000226417.6	3.37218	2.65104	0.411573	6.44124	1.18505e-10	9.79138e-10
ENSG00000122390.19	10.2983	4.51544	0.701137	6.44016	1.19347e-10	9.85585e-10
ENSG00000086619.14	7.70039	-2.29059	0.355746	-6.43883	1.20398e-10	9.93749e-10
ENSG00000123600.20	13.5662	-1.63536	0.25407	-6.43666	1.22131e-10	1.00753e-09
ENSG00000121749.15	93.6136	1.05219	0.16348	6.43618	1.22521e-10	1.01023e-09
ENSG00000074319.13	21.2062	2.13511	0.331759	6.43574	1.2287e-10	1.01258e-09
ENSG00000140612.14	47.0384	2.74737	0.426924	6.43527	1.23254e-10	1.01523e-09
ENSG00000196724.13	3.25984	-2.94407	0.457862	-6.43005	1.27565e-10	1.05019e-09
ENSG00000123146.20	129.661	5.82706	0.906271	6.42971	1.27845e-10	1.05195e-09
ENSG00000146112.12	5.40562	6.3937	0.994531	6.42886	1.28563e-10	1.05731e-09
ENSG00000141030.13	87.1683	1.74996	0.272265	6.42742	1.29789e-10	1.06685e-09
ENSG00000213965.3	5.12218	5.34696	0.832004	6.4266	1.30488e-10	1.07204e-09
ENSG00000070501.12	7.4012	1.96925	0.306445	6.42612	1.30899e-10	1.07487e-09
ENSG00000104381.14	7.77783	-1.80109	0.280298	-6.42563	1.31327e-10	1.07782e-09
ENSG00000229685.8	33.452	-2.69794	0.420076	-6.42251	1.34043e-10	1.09899e-09
ENSG00000076382.17	100.921	3.57636	0.556845	6.42253	1.34025e-10	1.09899e-09
ENSG00000154153.13	1.66636	4.41448	0.687381	6.42217	1.34349e-10	1.10093e-09
ENSG00000113296.14	3.2733	5.58707	0.87018	6.42059	1.35746e-10	1.1118e-09
ENSG00000277726.4	4.89977	-2.25849	0.351832	-6.41922	1.36975e-10	1.1213e-09
ENSG00000156239.12	7.12659	-1.87634	0.292396	-6.41713	1.38866e-10	1.1362e-09
ENSG00000065357.20	189.116	-2.80956	0.437846	-6.41676	1.39202e-10	1.13836e-09
ENSG00000115590.14	2.30417	5.88753	0.917789	6.4149	1.40911e-10	1.15175e-09
ENSG00000115902.11	13.4748	4.82296	0.7521	6.41266	1.43005e-10	1.16826e-09
ENSG00000169122.11	1.32985	5.15271	0.80359	6.41212	1.43512e-10	1.17181e-09
ENSG00000162366.8	3.2267	6.37561	0.994345	6.41187	1.43747e-10	1.17313e-09
ENSG00000170832.13	11.0079	1.87213	0.292039	6.41054	1.45003e-10	1.18277e-09
ENSG00000104756.16	21.0489	2.11632	0.330393	6.40547	1.49904e-10	1.22212e-09
ENSG00000094916.16	12.3833	2.43022	0.37958	6.4024	1.52954e-10	1.24635e-09
ENSG00000188917.15	21.1512	-1.9391	0.303004	-6.39957	1.55812e-10	1.26899e-09
ENSG00000110801.14	9.50297	1.62945	0.254635	6.39913	1.56261e-10	1.272e-09
ENSG00000125245.13	17.1685	-2.73827	0.4283	-6.39334	1.62297e-10	1.32046e-09
ENSG00000111912.20	49.8067	2.15649	0.337436	6.39083	1.64992e-10	1.3417e-09
ENSG00000161533.12	25.4357	1.57848	0.247074	6.3887	1.67298e-10	1.35976e-09
ENSG00000196378.13	3.83716	-2.18121	0.341484	-6.38743	1.68692e-10	1.3704e-09
ENSG00000018280.17	19.362	5.98777	0.937442	6.38734	1.68792e-10	1.37051e-09
ENSG00000147439.13	10.9638	2.25435	0.352978	6.38667	1.69538e-10	1.37587e-09
ENSG00000198346.11	4.58905	-2.73375	0.428132	-6.3853	1.71066e-10	1.38757e-09
ENSG00000168802.14	14.4991	4.26494	0.668055	6.38411	1.72393e-10	1.39761e-09
ENSG00000104408.11	1040.1	3.37202	0.52835	6.38216	1.74612e-10	1.41489e-09
ENSG00000141526.17	5.97741	6.47272	1.01444	6.38059	1.76402e-10	1.42867e-09
ENSG00000178607.16	3.0301	2.50594	0.392855	6.37879	1.78491e-10	1.44485e-09
ENSG00000005022.6	25.7133	1.52469	0.239205	6.37398	1.84182e-10	1.49016e-09
ENSG00000203618.6	2.43055	5.53295	0.868089	6.37372	1.84498e-10	1.49197e-09
ENSG00000110719.10	31.8209	5.12564	0.804206	6.37353	1.84721e-10	1.49301e-09
ENSG00000128309.16	3.87356	3.85882	0.605866	6.3691	1.9014e-10	1.53604e-09
ENSG00000135317.13	71.5146	-1.41205	0.221709	-6.36892	1.90365e-10	1.53707e-09
ENSG00000103528.17	2.52995	-4.24044	0.665968	-6.36734	1.92334e-10	1.55205e-09
ENSG00000137947.12	34.7017	2.3284	0.365683	6.36728	1.92414e-10	1.55205e-09
ENSG00000186594.14	26.6046	3.89206	0.611439	6.36542	1.9476e-10	1.57018e-09
ENSG00000235169.11	2.25602	5.36883	0.843456	6.36527	1.94948e-10	1.5709e-09
ENSG00000124243.17	2.70497	-3.46751	0.54477	-6.36509	1.95172e-10	1.57191e-09
ENSG00000123416.15	1346.99	2.50519	0.393668	6.36372	1.9692e-10	1.58519e-09
ENSG00000021776.11	44.1724	-1.63694	0.257438	-6.35858	2.03622e-10	1.63797e-09
ENSG00000121053.6	7.62018	7.51909	1.18252	6.35854	2.03682e-10	1.63797e-09
ENSG00000259986.1	5.0879	6.89182	1.08394	6.35811	2.04253e-10	1.64174e-09
ENSG00000118503.15	40.5515	4.02847	0.633637	6.35769	2.04813e-10	1.64541e-09
ENSG00000065413.20	42.9263	-1.9727	0.310341	-6.35657	2.06307e-10	1.65658e-09
ENSG00000132952.12	48.8717	-1.72596	0.271562	-6.35567	2.07519e-10	1.66548e-09
ENSG00000105402.8	24.4656	3.31296	0.52131	6.35508	2.08323e-10	1.67108e-09
ENSG00000141985.9	3.95918	6.16013	0.969381	6.35471	2.08822e-10	1.67425e-09
ENSG00000167703.15	8.5661	6.53839	1.02925	6.35258	2.11737e-10	1.69677e-09
ENSG00000180644.8	8.9892	6.80297	1.07118	6.35088	2.14085e-10	1.71472e-09
ENSG00000271303.2	3.48631	6.00934	0.946427	6.3495	2.1602e-10	1.72935e-09
ENSG00000166025.18	2.83882	4.81889	0.758951	6.34941	2.16146e-10	1.7295e-09
ENSG00000169682.18	9.07134	5.61766	0.884863	6.34862	2.17258e-10	1.73752e-09
ENSG00000103111.15	12.8632	3.62184	0.57069	6.34643	2.20368e-10	1.76151e-09
ENSG00000154144.13	23.569	-1.1905	0.18766	-6.34389	2.24035e-10	1.78993e-09
[truncated: 7,125 more rows]

## Sheet: README
Supplemental Table S3. Differential expression analysis results using Iso-Seq count reads between MDS and CLL samples.
