# Supplementary material for: Long-read transcriptome sequencing of CLL and MDS patients uncovers molecular effects of SF3B1 mutations
Source: HighWire-hosted journal article supplement (doi:10.1101/gr.279327.124), 2024-09-13
Supplement: Supplemental_Table_S4.xlsx [file Supplemental_Table_S4.xlsx]

## Sheet: ASEs called in all
gene	gene_id	chrom	strand	start	end	splice_type	novel	padj	pvalue	trA (reads supporting shorter version of the AS event)	trB (reads supporting longer version of the AS event)	nmdA	nmdB	nmdDiff	all_mut_PSI	all_mut_disp	all_wt_PSI	all_wt_disp	total_PSI	total_disp	C12_all_mut_in_cov	C12_all_mut_total_cov	C13_all_mut_in_cov	C13_all_mut_total_cov	C14_all_mut_in_cov	C14_all_mut_total_cov	C15_all_mut_in_cov	C15_all_mut_total_cov	C16_all_mut_in_cov	C16_all_mut_total_cov	C17_all_mut_in_cov	C17_all_mut_total_cov	C18_all_mut_in_cov	C18_all_mut_total_cov	C19_all_mut_in_cov	C19_all_mut_total_cov	M12_all_mut_in_cov	M12_all_mut_total_cov	M13_all_mut_in_cov	M13_all_mut_total_cov	M14_all_mut_in_cov	M14_all_mut_total_cov	M15_all_mut_in_cov	M15_all_mut_total_cov	M16_all_mut_in_cov	M16_all_mut_total_cov	M17_all_mut_in_cov	M17_all_mut_total_cov	M18_all_mut_in_cov
SEPTIN6	ENSG00000125354.24	chrX	-	119625379	119629317	3AS	FALSE	7.64149e-17	9.43557e-22	[5, 7, 2, 27, 25, 12, 102, 53, 59, 147, 22, 328, 17, 51, 100, 65, 213, 56, 61, 44, 194, 49, 104, 145, 150, 232, 55, 126, 48, 97, 174, 183, 227, 96, 98, 134, 151, 128, 133, 135, 137, 190, 191, 196, 205, 225, 377, 6, 13, 69, 110, 117, 119, 138, 142, 154, 161, 163, 175, 178, 180, 215, 223, 224, 228, 281, 294, 296, 307, 312, 315, 326, 333, 364, 375, 376, 15, 19, 23, 30, 31, 39, 41, 42, 45, 47, 57, 60…	[16, 14, 3, 34, 37, 71, 40, 217, 52, 32, 237, 26, 74, 77, 288, 385, 66, 164, 271, 295, 29, 50, 200, 241, 245, 263, 264, 269, 274, 278, 70, 75, 80, 130, 192, 235, 236, 240, 248, 255, 260, 265, 272, 283, 299, 300, 342, 349, 33, 36, 38, 43, 46, 67, 68, 72, 73, 76, 81, 84, 86, 89, 90, 179, 243, 244, 246, 247, 249, 251, 256, 259, 261, 267, 268, 273, 279, 282, 290, 292, 293, 302, 303, 306, 308, 311, 31…	0.0387725	0.0460251	0.00725256	0.443931	0.0293673	0.0327637	3.01686e-05	0.241482	0.0517005	149	256	309	586	344	886	741	992	103	212	45	251	79	724	125	366	21	36	66	96	17	135	36	74	0	0	4	16	16
MAP3K7	ENSG00000135341.18	chr6	-	90560214	90561621	3AS	TRUE	5.1899e-16	1.28168e-20	[1, 0, 6, 15, 9, 28, 7, 5, 19, 21, 149, 64, 126, 129, 101, 24, 23, 96, 12, 130, 370, 2, 29, 142, 150, 139, 10, 127, 147, 374, 111, 166, 38, 201, 100, 133, 167, 185, 373, 151, 152, 179, 183, 184, 187, 206, 212, 220, 3, 4, 8, 16, 25, 61, 135, 154, 223, 224, 430, 98, 103, 112, 128, 145, 158, 163, 168, 169, 192, 195, 200, 207, 208, 222, 228, 233, 246, 251, 354, 432, 441, 22, 26, 30, 32, 60, 68, 73, 7…	[14, 11, 43, 69, 62, 125, 20, 88, 91, 44, 37, 70, 97, 84, 57, 347, 42, 50, 99, 18, 122, 188, 31, 56, 79, 267, 54, 83, 293, 308, 317, 39, 53, 77, 137, 281, 110, 210, 321, 94, 109, 118, 175, 255, 289, 322, 323, 388, 47, 93, 115, 121, 136, 216, 238, 260, 263, 272, 278, 279, 283, 284, 292, 296, 302, 304, 305, 307, 315, 320, 334, 375, 384, 390, 398, 411, 419, 423, 17, 36, 41, 45, 48, 51, 52, 55, 71, 7…	0.207359	0.995907	0.788548	0.598387	0.0248149	0.0992518	0.000427563	0.346821	0.0626824	69	88	116	165	148	233	129	153	98	143	60	178	57	174	29	42	23	29	13	20	10	27	52	73	0	0	3	5	13
PRPF38A	ENSG00000134748.13	chr1	+	52414647	52414761	3AS	TRUE	1.09566e-15	4.05869e-20	[1, 8, 0, 5, 14, 32, 37, 15, 40, 74, 80, 98, 20, 44, 63, 88, 118, 3, 13, 42, 109, 29, 81, 82, 83, 91, 93, 102, 103, 106, 115, 116, 117, 126, 137, 140, 2, 9, 16, 17, 18, 24, 36, 52, 56, 58, 59, 64, 65, 66, 69, 70, 71, 72, 73, 77, 84, 90, 95, 97, 105, 110, 111, 113, 120, 125, 127, 128, 129, 131, 132, 133, 136, 138, 141, 142, 143, 144, 146, 148, 149, 150, 151, 154, 156, 159, 161, 163, 164, 165, 166]	[6, 10, 23, 25, 31, 104, 41, 43, 54, 122, 123, 130, 4, 134, 147, 21, 27, 30, 158, 34, 100, 112]	0.0910677	0.0788609	0.0122068	0.224398	0.00477587	0.0307728	3.87833e-06	0.127402	0.0121742	35	122	38	171	34	259	36	204	17	128	11	108	16	105	14	49	19	72	25	121	16	61	23	146	0	1	12	63	24
SERBP1	ENSG00000142864.15	chr1	-	67424959	67425082	3AS	FALSE	4.31874e-14	2.13308e-18	[1, 3, 134, 41, 64, 59, 72, 8, 34, 13, 125, 22, 185, 182, 202, 121, 128, 133, 167, 192, 228, 258, 44, 51, 70, 71, 81, 126, 131, 147, 190, 198, 226, 7, 11, 16, 17, 47, 58, 60, 62, 65, 73, 83, 95, 96, 103, 118, 119, 123, 127, 130, 132, 148, 154, 156, 159, 160, 186, 210, 212, 217, 218, 231, 234, 259, 260, 263, 265, 266, 274, 278, 279, 280, 282, 284, 287, 290, 293, 294, 295, 296, 297, 299, 301, 303]	[2, 5, 48, 33, 114, 37, 6, 74, 50, 89, 43, 23, 53, 78, 170, 172, 92, 79, 142, 0, 18, 49, 86, 207, 257, 77, 115, 209, 237, 14, 30, 117, 162, 181, 220, 275, 63, 66, 75, 85, 104, 106, 113, 124, 136, 138, 143, 155, 189, 199, 211, 214, 264, 4, 15, 19, 20, 21, 26, 29, 31, 32, 46, 52, 55, 57, 61, 68, 69, 80, 84, 87, 88, 90, 91, 94, 97, 99, 101, 102, 105, 108, 111, 112, 116, 122, 137, 140, 141, 144, 146,…	0.0470361	0.0433806	0.00365553	0.817202	0.0047085	0.546292	0.00171583	0.686826	0.021444	253	274	295	332	310	356	193	214	201	240	171	245	141	211	178	197	126	137	163	196	65	88	137	165	0	0	41	45	98
ENOX2	ENSG00000165675.16	chrX	-	130637404	130656580	3AS	TRUE	1.05669e-12	6.52393e-17	[4, 9, 11, 14, 20, 45, 35, 140, 93, 80, 192, 74, 19, 86, 257, 79, 115, 130, 229, 275, 57, 61, 184, 227, 52, 65, 105, 114, 145, 48, 53, 71, 72, 75, 78, 84, 89, 108, 137, 147, 281, 284, 286, 303, 311, 348, 54, 64, 66, 111, 131, 138, 178, 180, 190, 198, 208, 276, 295, 300, 314, 315, 316, 332, 335, 347, 350, 352, 355, 359, 8, 27, 50, 58, 59, 60, 68, 69, 70, 73, 87, 88, 90, 96, 106, 109, 112, 121, 136…	[0, 2, 3, 139, 6, 7, 1, 49, 39, 21, 5, 22, 141, 235, 33, 171, 18, 12, 41, 151, 193, 30, 228, 346, 16, 28, 122, 173, 77, 143, 221, 245, 15, 123, 146, 149, 150, 179, 182, 199, 200, 205, 217, 36, 81, 100, 127, 152, 153, 195, 201, 214, 233, 259, 268, 289, 38, 47, 51, 76, 94, 117, 119, 124, 125, 134, 144, 156, 158, 161, 162, 164, 170, 187, 197, 203, 206, 207, 222, 237, 238, 264, 297, 308, 345, 13, 17,…	0.0672736	0.0635268	0.00374681	0.304596	0.0182937	0.787218	0.00170941	0.536945	0.0644569	32	121	27	163	64	264	35	181	26	97	91	174	56	171	5	24	11	55	14	20	11	24	0	7	0	0	1	2	2
NFYA	ENSG00000001167.14	chr6	+	41073084	41079028	3AS	TRUE	1.14807e-11	8.50572e-16	[3, 1, 13, 22, 7, 5, 54, 9, 53, 101, 30, 17, 50, 18, 24, 63, 10, 44, 153, 31, 97, 146, 148, 156, 107, 159, 72, 131, 187, 199, 16, 28, 52, 106, 123, 150, 152, 160, 161, 163, 164, 283, 40, 76, 93, 168, 178, 212, 218, 231, 246, 8, 27, 88, 91, 116, 133, 162, 167, 179, 183, 189, 195, 205, 229, 258, 274, 281, 300, 301, 304, 2, 11, 14, 29, 41, 48, 49, 55, 62, 65, 66, 68, 69, 70, 71, 77, 78, 84, 85, 86, …	[34, 38, 37, 59, 35, 47, 64, 43, 233, 51, 127, 36, 290, 58, 140, 142, 45, 61, 232, 234, 115, 128, 130, 134, 135, 141, 269, 286, 288, 289, 291, 297, 42, 299, 46, 312, 314, 315, 120, 95, 96, 223, 230, 104, 240, 117, 118, 119, 248, 121, 125]	0.0573876	0.0440181	0.0133695	0.219895	0.0139708	0.00283435	4.34516e-05	0.102084	0.0273466	40	115	24	219	45	444	88	230	40	166	5	102	0	147	11	41	10	45	4	18	9	44	6	32	0	0	4	15	11
RBM18	ENSG00000119446.14	chr9	-	122261498	122264714	3AS	TRUE	2.04646e-11	1.76885e-15	[3, 12, 8, 4, 70, 62, 83, 102, 128, 130, 5, 131, 7, 11, 13, 59, 61, 65, 68, 72, 73, 74, 75, 76, 95, 103, 106, 127]	[0, 2, 1, 6, 32, 24, 19, 29, 26, 16, 27, 28, 42, 47, 55, 10, 21, 53, 58, 33, 36, 38, 40, 45, 50, 60, 85, 98, 122, 17, 34, 44, 80, 81, 86, 87, 96, 104, 107, 108, 117, 118, 121, 15, 22, 23, 25, 30, 31, 37, 41, 48, 51, 56, 57, 63, 64, 66, 67, 69, 77, 78, 84, 88, 89, 91, 93, 94, 100, 101, 109, 110, 111, 113, 115, 116, 119, 120, 124, 126, 129, 132]	1	0.346179	0.653821	0.734829	0.00871351	0.962015	0.00020982	0.850237	0.0179373	83	124	81	144	109	160	59	91	93	134	81	95	53	62	24	35	24	26	37	47	54	67	83	111	3	6	13	21	61
OXA1L	ENSG00000155463.14	chr14	+	22768171	22769790	3AS	TRUE	9.16882e-11	9.05719e-15	[3, 1, 18, 20, 22, 47, 58, 59, 19, 30, 86, 87, 90, 135, 163, 176, 140, 166, 180, 57, 76, 81, 99, 129, 132, 133, 134, 10, 142, 161, 181, 183, 193, 67, 68, 196, 70, 71, 198, 77, 207, 80, 209, 211, 216, 218, 93, 221, 225, 226, 228, 102, 232, 107, 122, 123, 124, 234]	[37, 12, 38, 36, 96, 69, 65, 148, 175, 147, 158, 174, 189, 92, 165, 170, 45, 46, 173, 177, 178, 179, 182, 190, 191, 206, 210, 213, 214, 219, 220, 95, 224]	0.341873	1	0.658127	0.420336	0.0172736	0.0512191	4.6459e-06	0.232952	0.0431188	21	32	20	46	33	68	21	62	52	77	9	42	17	47	53	86	6	8	15	38	15	47	13	33	0	0	8	14	21
SLTM	ENSG00000137776.17	chr15	-	58916999	58932355	3AS	FALSE	1.50166e-10	1.6688e-14	[1, 0, 6, 197, 2, 13, 7, 14, 19, 97, 18, 4, 389, 9, 25, 21, 77, 98, 69, 58, 76, 38, 68, 26, 160, 473, 63, 12, 344, 399, 276, 83, 49, 40, 189, 54, 101, 420, 57, 84, 246, 475, 158, 37, 225, 248, 460, 275, 396, 798, 1132, 23, 514, 449, 482, 212, 331, 366, 174, 372, 490, 617, 92, 129, 230, 231, 343, 400, 481, 820, 78, 446, 501, 10, 59, 116, 206, 249, 329, 334, 441, 71, 82, 113, 196, 326, 377, 378, 50…	[3, 66, 47, 11, 107, 345, 89, 190, 811, 80, 459, 88, 363, 483, 124, 319, 857, 60, 950, 115, 128, 162, 165, 1276, 300, 969, 656, 696, 185, 1214, 1220, 1268, 1272, 821, 834, 851, 1367, 863, 1400, 1402, 896, 934, 1006, 1024, 1025, 1035, 1081, 1083, 1105, 1110, 1201, 1224, 201, 203, 1243, 733, 1269, 771, 1289, 1294, 1299, 1331, 336, 340, 866, 936, 954, 956, 965, 1010, 1014, 1017, 1027, 1036, 1038, 10…	0.310406	0.32882	0.0184138	0.157703	0.00567635	0.0166101	6.77863e-05	0.0906224	0.00850313	40	380	89	824	60	986	77	529	60	238	8	201	49	378	7	98	9	52	11	51	17	76	66	274	0	3	3	16	15
ANKHD1	ENSG00000131503.21	chr5	+	140436257	140438493	3AS	FALSE	5.55773e-10	6.86258e-14	[71, 65, 46, 64, 31, 47, 411, 144, 75, 521, 151, 415, 62, 234, 417, 177, 478, 548, 97, 99, 515, 516, 523, 401, 533, 409, 162, 166, 553, 48, 592, 81, 608, 374, 517, 561, 393, 395, 524, 525, 400, 147, 150, 534, 281, 539, 418, 422, 424, 425, 171, 173, 175, 433, 557, 181, 560, 183, 184, 185, 186, 562, 563, 573, 578, 67, 196, 453, 461, 79, 82, 609, 101, 102, 103, 486]	[7, 0, 8, 4, 11, 2, 30, 95, 12, 16, 3, 23, 349, 18, 52, 26, 78, 212, 9, 43, 5, 250, 310, 136, 238, 164, 219, 260, 336, 159, 236, 248, 252, 480, 559, 149, 161, 180, 235, 254, 309, 345, 1, 17, 20, 536, 51, 170, 233, 274, 284, 306, 307, 410, 464, 473, 518, 519, 531, 45, 520, 69, 585, 587, 80, 597, 195, 237, 255, 269, 271, 273, 276, 278, 280, 282, 285, 287, 305, 311, 316, 319, 332, 334, 346, 353, 357…	0.487549	0.568102	0.0805527	0.649055	0.0311061	0.968916	0.00039433	0.805709	0.0384752	9	42	86	117	72	137	46	115	55	95	45	53	135	142	17	26	4	8	86	176	45	60	113	140	0	0	20	33	34
COG1	ENSG00000166685.12	chr17	+	73201900	73203023	3AS	TRUE	7.42709e-10	1.1005e-13	[19, 34, 58, 39, 0, 197, 146, 193, 208, 210, 213, 100, 257, 274, 180, 205, 217, 266, 269, 277, 22, 24, 30, 166, 176, 177, 178, 183, 184, 187, 189, 190, 63, 191, 69, 198, 206, 216, 226, 249, 255]	[1, 6, 2, 18, 45, 75, 10, 20, 28, 21, 99, 59, 72, 32, 14, 83, 90, 211, 242, 4, 12, 194, 204, 38, 132, 200, 215, 276, 16, 93, 155, 195, 248, 9, 74, 94, 101, 119, 125, 160, 175, 209, 227, 41, 43, 64, 86, 89, 96, 104, 108, 114, 118, 122, 139, 145, 157, 159, 169, 173, 202, 207, 212, 219, 220, 221, 222, 251, 254, 260, 262, 281, 284, 3, 5, 7, 8, 11, 13, 15, 17, 26, 27, 29, 31, 35, 40, 44, 46, 49, 50, 5…	0.361345	0.3498	0.0115448	0.792704	0.00859415	0.995173	1.51385e-05	0.897189	0.0198188	3	4	79	107	116	137	156	219	5	6	6	6	125	132	6	10	1	1	32	56	13	16	30	38	0	0	12	18	5
DLST	ENSG00000119689.15	chr14	+	74889349	74889896	3AS	FALSE	7.42709e-10	1.0574e-13	[0, 4, 9, 11, 65, 8, 2, 63, 74, 45, 60, 53, 103, 123, 137, 138, 33, 75, 128, 36, 68, 94, 41, 42, 79, 111, 134, 16, 37, 71, 72, 78, 115, 143, 150, 171, 10, 20, 38, 43, 44, 48, 57, 64, 66, 67, 69, 76, 77, 80, 81, 88, 89, 90, 91, 92, 95, 98, 101, 102, 112, 118, 119, 120, 121, 130, 131, 142, 144, 148, 157, 159, 162, 164, 165, 168, 170, 173, 174]	[15, 14, 23, 24, 18, 153, 114, 141, 154, 31, 108, 122, 21, 156, 56, 70, 155, 158, 34, 167, 169, 49, 113, 116, 124, 5, 6, 145, 19, 149, 22, 26, 27, 28, 30, 161, 40, 172, 51, 55, 58, 61, 62, 96, 107, 109, 110, 117, 126, 127]	0.226917	0.672794	0.445877	0.448861	0.0216492	0.0185291	0.000503805	0.230212	0.069438	5	6	24	47	26	46	4	13	7	10	0	2	6	62	3	4	3	6	25	57	0	2	15	26	0	0	7	17	1
TMEM14C	ENSG00000284936.2	KZ208911.1	+	234125	235453	3AS	FALSE	3.1267e-09	5.01903e-13	[0, 6, 13, 20, 25, 26]	[8, 9, 33, 14, 18, 30]	0.0149254	0.0173913	0.00246593	0.680908	0.000107896	0.0262102	8.45516e-06	0.322196	0.10426	1	1	0	0	0	1	1	2	0	0	1	3	2	5	0	0	4	4	9	9	2	4	5	11	0	0	3	4	19
DDX5	ENSG00000108654.16	chr17	-	64501891	64502009	3AS	TRUE	3.70805e-09	6.41008e-13	[46, 27, 79, 329, 218, 524, 219, 175, 2426, 1943, 346, 2523, 2040, 2699, 1554, 1305, 1306, 1437, 2733, 1967, 1969, 1590, 1856, 2116, 2648, 2036, 2166, 1533, 2801]	[168, 232, 28, 234, 1946, 285, 152, 254, 237, 1689, 341, 2031, 2044, 1797, 518, 2724, 2017, 2694, 274, 278, 2717, 288, 2601, 2730, 1595, 1611, 2004, 347, 354, 2535, 2701, 270, 2703, 273, 2707, 2593, 2721, 2725, 2602, 2603, 300, 1968, 1848, 2618, 1980, 1981, 200, 1995, 2000, 343, 2527, 229, 2536, 1642, 2025, 369, 2675, 373]	0.784897	0.793149	0.00825185	0.756491	0.0285755	0.103103	0.00193453	0.458118	0.107188	15	21	48	72	37	52	34	68	124	138	3	14	11	37	11	13	6	6	2	2	15	20	34	45	0	0	0	0	11
ZNF91	ENSG00000167232.14	chr19	-	23362725	23373741	3AS	TRUE	3.76405e-09	6.97167e-13	[3, 88, 11, 39, 36, 83, 35, 92, 96, 8, 9, 103, 203, 82, 98, 217, 40, 160, 12, 37, 84, 97, 102, 108, 124, 131, 138, 147, 158, 181, 196, 4, 5, 6, 7, 42, 52, 71, 74, 79, 85, 86, 87, 89, 90, 93, 95, 100, 104, 107, 118, 119, 122, 123, 126, 128, 129, 130, 132, 133, 134, 141, 143, 144, 145, 146, 149, 150, 152, 155, 156, 157, 195, 215, 216, 222, 233, 235, 243, 247, 252, 261, 263, 264, 265]	[16, 114, 46, 20, 33, 45, 21, 167, 135, 164, 29, 75, 189, 201, 55, 78, 49, 53, 54, 58, 153, 178, 56, 65, 68, 163, 165, 169, 171, 176, 179, 185, 194, 202, 204, 220, 242, 262, 13, 15, 19, 25, 32, 47, 51, 60, 61, 63, 69, 72, 105, 106, 116, 161, 162, 168, 173, 175, 177, 182, 183, 187, 190, 192, 193, 197, 198, 206, 213, 214, 218, 223, 224, 227, 228, 229, 230, 231, 232, 237, 239, 249, 250, 251, 258]	0.215923	0.274583	0.0586598	0.711307	0.0437734	0.0472877	0.000358851	0.397437	0.115934	162	170	176	218	128	173	193	236	126	147	29	60	11	45	7	8	6	9	1	1	0	2	0	0	0	0	0	0	1
SLC3A2	ENSG00000168003.17	chr11	+	62881447	62881892	3AS	TRUE	4.44197e-09	9.56365e-13	[22, 0, 24, 46, 47, 11, 2, 26, 23, 1, 142, 7, 163, 133, 6, 76, 8, 103, 77, 10, 25, 106, 138, 73, 150, 151, 5, 71, 79, 168, 191, 78, 149, 159, 175, 183, 4, 14, 16, 75, 160, 166, 194, 9, 98, 153, 178, 12, 38, 140, 145, 155, 170, 184, 189, 55, 62, 72, 91, 93, 96, 117, 118, 144, 154, 158, 167, 169, 173, 177, 180, 196, 209, 210, 222, 231, 232, 233, 251, 255, 3, 17, 18, 19, 20, 21, 39, 40, 41, 43, 44, …	[69, 58, 204, 63, 104, 207, 59, 195, 66, 197, 226, 15, 193, 235, 56, 57, 64, 65, 192, 70, 201, 206, 94, 95, 228, 101, 230, 243, 247, 248, 252]	0.191911	0.137931	0.0539799	0.0983767	0.00147073	0.00685247	3.08129e-05	0.0548565	0.0040453	5	17	1	53	7	112	17	128	5	46	1	30	3	149	16	129	3	16	31	181	10	115	11	116	0	0	2	62	11
CEP135	ENSG00000174799.11	chr4	+	56008382	56009734	3AS	TRUE	4.44197e-09	1.00464e-12	[0, 29, 3, 7, 6, 11, 16, 81, 90, 101, 8, 28, 186, 10, 12, 70, 88, 94, 100, 120, 128, 198, 218, 14, 15, 43, 44, 46, 73, 76, 107, 111, 113, 181, 219, 13, 24, 26, 41, 45, 47, 48, 49, 50, 55, 56, 58, 59, 61, 63, 67, 71, 72, 75, 77, 78, 79, 80, 83, 84, 85, 86, 89, 93, 95, 97, 102, 103, 104, 105, 109, 110, 114, 115, 116, 118, 123, 124, 125, 126, 127, 137, 139, 140, 143, 144, 148, 159, 163, 164, 165, 16…	[18, 35, 19, 27, 187, 65, 141, 185, 210, 130, 135, 152, 154, 156, 37, 38, 62, 190, 66, 194, 201, 215, 129, 132, 133, 136, 138, 142, 146, 21, 22, 23, 147, 149, 151, 153, 30, 31, 33, 34, 36, 162, 53, 57, 60, 193, 196, 197, 206, 211, 212, 221, 225, 228, 236, 157, 239]	0.311155	0.985816	0.674661	0.398764	0.022361	0.0096257	3.36582e-07	0.197895	0.0516611	14	21	10	27	23	38	7	12	2	4	3	18	1	14	0	0	1	3	8	12	1	5	12	19	0	0	0	0	1
GCC2	ENSG00000135968.21	chr2	+	108485908	108486510	3AS	FALSE	4.44197e-09	1.03082e-12	[14, 54, 12, 125, 65, 3, 107, 6, 110, 51, 66, 115, 164, 256, 32, 62, 63, 68, 75, 146, 40, 83, 92, 111, 118, 120, 151, 152, 157, 163, 165, 168, 177, 184, 229, 280, 288, 347, 5, 18, 33, 36, 37, 39, 49, 58, 59, 74, 84, 88, 89, 90, 94, 95, 99, 100, 101, 112, 124, 127, 128, 130, 132, 135, 138, 143, 148, 150, 154, 156, 172, 173, 178, 180, 182, 183, 191, 192, 198, 201, 212, 253, 259, 264, 265, 268, 271,…	[21, 50, 28, 160, 223, 42, 237, 322, 227, 240, 30, 45, 332, 207, 337, 222, 224, 239, 241, 244, 257, 258, 260, 261, 262, 263, 267, 20, 22, 31, 43, 44, 301, 321, 325, 326, 329, 205, 206, 208, 333, 210, 215, 344, 217, 346, 219, 353, 230, 231, 233, 234, 361, 236, 242, 122, 370]	0.460366	0.425676	0.0346902	0.616911	0.0520334	0.024838	5.36207e-07	0.324552	0.109415	29	32	5	8	36	62	9	17	3	7	1	12	1	10	2	2	2	2	5	5	0	1	1	1	0	0	0	1	3
NONO	ENSG00000147140.17	chrX	+	71297047	71297360	IR	FALSE	4.44197e-09	1.09501e-12	[67, 97, 96, 98, 627, 130, 10, 99, 113, 115, 778, 154, 270, 93, 132, 632, 266, 135, 122, 257, 580, 87, 111, 81, 619, 626, 661, 824, 829, 576, 577, 581, 588, 91, 100, 644, 655, 669, 670, 166, 247, 780, 289, 816, 863, 667, 675, 677, 235, 263, 268, 790, 799, 801, 820, 836, 837, 855, 866, 878, 94, 607, 615, 106, 110, 634, 134, 653, 146, 149, 151, 662, 162, 169, 691, 692, 740, 238, 245, 250, 267, 277,…	[92, 131, 64, 205, 371, 393, 186, 368, 309, 327, 501, 640, 282, 665, 397, 572, 591, 613, 116, 642, 647, 220, 818, 338, 873, 402, 594, 606, 611, 630, 633, 663, 222, 812, 305, 830, 351, 442, 445, 519, 27, 547, 551, 65, 69, 71, 586, 587, 645, 646, 143, 657, 152, 163, 684, 180, 187, 716, 722, 723, 213, 284, 300, 815, 848, 849, 850, 860, 353, 354, 362, 377, 891, 910, 913, 917, 453, 466, 475]	0.943144	0.984177	0.0410334	0.166212	0.0157338	0.885083	0.00480754	0.484746	0.118171	4	135	13	80	25	171	22	150	7	98	1	6	16	18	1	20	0	9	3	58	7	17	17	156	0	0	0	6	7
NET1	ENSG00000173848.19	chr10	+	5455118	5456086	3AS	TRUE	4.44197e-09	1.09697e-12	[12, 1, 17, 176, 2, 164, 42, 177, 20, 0, 18, 7, 152, 3, 9, 184, 14, 15, 31, 32, 147, 26, 183, 19, 22, 260, 27, 79, 180, 45, 46, 209, 279, 59, 74, 112, 151, 155, 187, 203, 208, 231, 54, 70, 106, 127, 188, 205, 223, 224, 6, 8, 33, 53, 119, 123, 129, 179, 192, 194, 197, 201, 230, 244, 247, 249, 256, 263, 275, 11, 28, 37, 41, 47, 57, 86, 89, 117, 190, 193, 204, 221, 242, 251, 254, 268, 276, 281, 286,…	[84, 67, 104, 121, 225, 227, 228, 108, 280, 233, 75, 232, 113, 71, 243, 142, 292, 167, 68, 90, 91, 103, 115, 255, 257, 132, 136, 265, 139, 141, 271, 146, 274, 148, 278, 23, 283, 166, 39, 296, 299, 83, 88, 105, 248, 124]	0.0452261	0.0580448	0.0128187	0.149915	0.00234079	0.00115063	1.4292e-06	0.0706955	0.0130122	0	0	0	4	0	27	5	19	0	5	0	5	0	27	0	0	1	22	26	130	3	23	98	649	0	0	13	51	22
ZNF410	ENSG00000119725.20	chr14	+	73892208	73893796	3AS	FALSE	4.76638e-09	1.23594e-12	[0, 2, 12, 3, 126, 16, 8, 45, 182, 29, 178, 9, 10, 35, 41, 90, 133, 62, 68, 198, 25, 43, 258, 7, 22, 24, 34, 49, 50, 59, 97, 105, 131, 200, 224, 261, 266, 303, 5, 60, 102, 118, 157, 165, 168, 171, 241, 28, 85, 89, 98, 113, 114, 122, 145, 152, 189, 210, 262, 269, 270, 272, 301, 6, 17, 21, 61, 66, 70, 72, 80, 95, 101, 115, 120, 139, 142, 143, 151, 162, 166, 170, 176, 177, 181, 186, 199, 228, 229, 2…	[18, 57, 195, 300, 54, 221, 128, 389, 14, 15, 19, 26, 27, 415, 37, 39, 298, 299, 431, 307, 308, 311, 439, 441, 187, 191, 192, 323, 327, 329, 336, 339, 342, 344, 351, 359, 240, 368, 242, 370, 374, 378]	0.237349	0.179688	0.0576619	0.138619	0.00401106	0.00497079	1.0754e-07	0.074298	0.0092324	8	30	4	31	3	48	2	44	7	74	2	33	0	25	7	31	4	7	5	33	4	35	9	68	0	0	8	36	5
ZNF91	ENSG00000167232.14	chr19	-	23357714	23362739	ALJ	TRUE	6.7172e-09	1.82474e-12	[3, 30, 88, 17, 114, 43, 11, 46, 39, 36, 45, 83, 167, 135, 164, 35, 92, 96, 205, 8, 91, 109, 0, 9, 48, 29, 99, 166, 44, 103, 201, 203, 55, 82, 98, 111, 217, 244, 22, 34, 40, 49, 53, 54, 58, 80, 81, 113, 127, 153, 160, 178, 208, 219, 12, 26, 37, 56, 65, 68, 84, 97, 102, 108, 115, 124, 131, 138, 147, 158, 163, 165, 169, 171, 174, 176, 180, 181, 185, 186, 194, 196, 202, 204, 220, 242, 259, 262, 1, 4…	[16, 31, 18, 20, 33, 21, 137, 75, 189, 78, 77, 179, 73, 24, 32, 60, 61, 190, 70, 207, 224, 121]	0.39521	0.0525803	0.342629	0.524289	0.0354912	0.0401775	0.000494663	0.284582	0.0719582	149	215	152	254	119	231	180	318	130	189	25	73	7	79	7	10	5	11	0	4	1	3	1	2	0	0	0	0	1
ZNF91	ENSG00000167232.14	chr19	-	23357714	23362725	ALJ	TRUE	7.19629e-09	2.04374e-12	[16, 31, 88, 114, 18, 11, 46, 20, 33, 39, 45, 21, 83, 167, 135, 164, 92, 96, 205, 91, 109, 0, 48, 29, 75, 137, 99, 166, 189, 44, 103, 201, 203, 55, 78, 82, 98, 111, 217, 244, 34, 40, 49, 53, 54, 58, 77, 80, 81, 127, 153, 160, 178, 208, 219, 12, 26, 56, 65, 68, 73, 84, 102, 115, 124, 131, 147, 163, 165, 169, 171, 174, 176, 179, 180, 181, 185, 186, 194, 202, 204, 220, 242, 259, 262, 1, 4, 5, 6, 7, …	[3, 30, 17, 43, 36, 35, 8, 9, 22, 113, 138, 158, 37, 196, 97, 108, 128, 256, 133, 136, 157, 159, 41, 57, 195, 74, 79, 225, 118, 120, 126, 266]	0.322929	0.127315	0.195614	0.247974	0.0320422	0.69057	2.36749e-05	0.428322	0.0613809	6	215	40	254	46	231	44	318	27	189	26	73	52	79	0	10	5	11	1	4	2	3	0	2	0	0	0	0	1
FAR2	ENSG00000064763.11	chr12	+	29297200	29307657	3AS	TRUE	7.86015e-09	2.32934e-12	[0, 43, 22, 25, 13, 51, 15, 48, 61, 3, 23, 111, 55, 63, 89, 14, 34, 47, 57, 68, 92, 5, 17, 29, 54, 126, 135, 6, 10, 11, 19, 20, 24, 26, 28, 32, 36, 38, 39, 42, 44, 45, 46, 50, 52, 53, 59, 60, 65, 66, 67, 73, 74, 75, 76, 77, 79, 82, 83, 84, 88, 90, 97, 98, 99, 101, 102, 103, 106, 108, 110, 114, 116, 117, 120, 123, 124, 125, 127, 129, 130, 133, 134, 139, 140, 141, 142, 143, 144, 147, 149, 151]	[12, 85, 18, 136, 9, 138, 78, 81, 104, 113, 132, 145, 146, 148, 150, 33, 37, 80, 91, 105, 107, 119, 121]	0.0429066	0.0784314	0.0355248	0.153498	0.000672971	0		0.0691821	0.00925463	0	0	0	0	0	1	0	0	0	0	0	0	0	2	0	0	33	157	4	44	1	9	0	4	0	0	0	2	10
VEZT	ENSG00000028203.18	chr12	+	95266632	95270050	3AS	FALSE	9.93817e-09	3.06787e-12	[0, 3, 22, 18, 127, 300, 15, 25, 70, 299, 35, 177, 24, 102, 84, 91, 313, 98, 497, 61, 123, 362, 495, 16, 315, 17, 92, 45, 100, 197, 297, 303, 333, 442, 136, 150, 189, 437, 30, 33, 342, 60, 153, 275, 278, 283, 301, 390, 53, 73, 124, 126, 167, 191, 246, 263, 272, 349, 375, 414, 421, 775, 783, 7, 8, 118, 147, 166, 323, 370, 441, 443, 513, 745, 776, 928, 935, 1055, 31, 55, 57, 65, 104, 122, 139, 217,…	[6, 2, 23, 28, 273, 11, 1, 269, 289, 46, 58, 85, 339, 12, 105, 271, 156, 20, 499, 378, 79, 385, 50, 74, 90, 47, 80, 268, 78, 14, 40, 49, 158, 318, 130, 429, 687, 87, 498, 234, 285, 34, 179, 288, 454, 532, 663, 799, 120, 27, 43, 54, 72, 83, 426, 555, 77, 89, 119, 173, 210, 304, 374, 399, 478, 585, 869, 36, 129, 196, 199, 212, 233, 274, 372, 574, 640, 735, 970, 71, 125, 131, 270, 284, 305, 329, 337…	0.766103	0.795124	0.0290211	0.748853	0.00238375	0.54848	0.00300829	0.648746	0.0123667	127	157	219	299	194	246	147	172	183	223	153	250	164	235	37	46	31	38	36	47	12	18	100	136	0	1	9	10	19
USP15	ENSG00000135655.16	chr12	+	62389514	62389633	IR	TRUE	1.65337e-08	5.30804e-12	[63, 169, 34, 56, 174, 539, 552, 497, 506, 133, 137, 152, 513, 530, 592, 850, 471, 521, 544, 569, 640, 646, 795, 829, 858, 893, 536, 540, 542, 545, 547, 550, 551, 561, 562, 600, 107, 1186, 826, 837, 889, 982, 474, 485, 999, 490, 1012, 504, 1028, 517, 1029, 522, 11, 525, 1040, 1041, 1042, 1044, 1022, 1049, 556, 1069, 1072, 568, 1080, 574, 1087, 581, 1094, 1095, 588, 78, 79, 80, 596, 599, 1113, 603…	[15, 200, 106, 59, 112, 256, 296, 255, 692, 290, 366, 12, 395, 537, 170, 435, 198, 333, 86, 119, 642, 516, 383, 138, 139, 511, 274, 659, 404, 409, 155, 284, 412, 291, 422, 168, 43, 940, 1197, 434, 179, 180, 54, 311, 315, 446, 449, 450, 326, 457, 585, 459, 1096, 973, 593, 210, 468, 1239, 1240, 606, 863, 480, 610, 100, 491, 754, 118, 632, 377, 250, 380]	0.993827	1	0.00617284	0.177673	0.00691356	0.85583	7.26375e-06	0.480981	0.0952721	4	20	3	30	5	44	1	21	9	30	2	6	5	18	2	6	0	2	0	0	0	5	2	42	0	0	0	0	2
ZBED5	ENSG00000236287.8	chr11	-	10855086	10856143	3AS	FALSE	2.59734e-08	8.6593e-12	[0, 8, 5, 13, 41, 10, 55, 63, 14, 27, 31, 32, 40, 48, 53, 54, 57, 61, 62, 64, 67, 71, 77, 78, 79, 81, 83, 84, 88, 91, 94, 96, 103, 105, 106, 109]	[2, 12, 16, 15, 21, 68, 70, 76, 33, 59, 60, 75, 80, 82, 87, 90, 98, 99, 102, 104, 110]	0.358855	0.279679	0.0791761	0.584613	0.0173848	0.203589	0.00981406	0.39383	0.0465135	262	358	573	790	326	576	507	636	157	309	97	250	142	496	54	82	25	33	32	43	28	60	33	56	0	0	14	26	15
RWDD4	ENSG00000182552.15	chr4	-	183655961	183658928	3AS	TRUE	3.36886e-08	1.16474e-11	[2, 0, 55, 7, 10, 3, 72, 38, 9, 32, 122, 31, 48, 62, 53, 61, 14, 23, 24, 92, 105, 15, 46, 50, 59, 60, 65, 77, 83, 89, 99, 132, 1, 6, 17, 18, 29, 30, 35, 36, 45, 47, 49, 52, 56, 57, 68, 70, 73, 75, 78, 79, 80, 81, 82, 85, 86, 93, 96, 100, 102, 107, 111, 114, 116, 117, 119, 121, 125, 128, 130, 135, 136, 137, 139, 141, 142, 143]	[5, 13, 22, 19, 20, 26, 25, 123, 84, 87, 64, 74, 90, 95, 127, 134, 133, 138, 37, 41, 43, 54, 88, 98, 109, 110, 115, 118]	0.244019	1	0.755981	0.276075	0.0180722	0.0394386	0.000293731	0.155994	0.0218119	28	90	20	80	24	98	32	73	16	81	5	68	4	37	12	38	11	15	15	32	9	48	3	29	0	2	2	6	10
SLC7A7	ENSG00000155465.20	chr14	-	22773224	22773728	ALJ	TRUE	3.41356e-08	1.22235e-11	[0, 28, 2, 39, 7, 17, 20, 38, 112, 52, 124, 6, 10, 13, 162, 167, 79, 88, 14, 46, 59, 75, 96, 50, 121, 24, 129, 35, 110, 4, 29, 97, 128, 54, 94, 183, 208, 331, 22, 72, 168, 19, 58, 93, 99, 141, 149, 49, 3, 118, 212, 229, 8, 41, 65, 82, 122, 126, 213, 37, 53, 61, 80, 123, 166, 178, 216, 516, 12, 36, 43, 68, 83, 85, 91, 100, 113, 116, 119, 130, 137, 140, 201, 369, 443, 519, 11, 16, 25, 31, 55, 136, …	[330, 339, 345, 5, 346, 363, 372, 337, 357, 185, 365, 384, 414, 418, 444, 392, 409, 417, 419, 423, 425, 428, 438, 332, 480, 378, 394, 397, 401, 402, 405, 412, 413, 415, 548, 421, 427, 429, 555, 431, 557, 560, 434, 562, 565, 566, 567, 441, 568, 569, 573, 447, 450, 451, 579, 580, 581, 455, 456, 333, 342, 343, 344, 347, 348, 475, 354, 482, 377, 379]	0.344796	0.315254	0.0295419	0.185047	0.0146671	0.00118405	3.93496e-06	0.0978418	0.0261126	21	105	8	69	46	356	64	238	10	52	1	47	18	290	4	64	2	9	6	29	77	336	9	20	0	0	0	1	6
SLC7A7	ENSG00000155465.20	chr14	-	22773716	22773932	3AS	TRUE	3.42552e-08	1.26893e-11	[0, 28, 2, 39, 7, 17, 20, 38, 112, 52, 124, 6, 10, 13, 162, 167, 79, 88, 14, 46, 59, 75, 96, 50, 121, 24, 129, 35, 110, 4, 29, 97, 128, 54, 94, 208, 331, 22, 72, 168, 19, 58, 93, 99, 141, 149, 49, 3, 212, 229, 8, 41, 82, 122, 126, 213, 37, 53, 61, 123, 166, 178, 216, 516, 12, 36, 43, 68, 83, 85, 91, 100, 113, 119, 130, 137, 140, 201, 369, 443, 519, 11, 16, 25, 31, 55, 136, 144, 146, 147, 181, 193…	[330, 339, 345, 5, 346, 363, 372, 337, 357, 185, 365, 384, 414, 418, 444, 392, 409, 417, 419, 423, 425, 428, 438, 332, 480, 378, 394, 397, 401, 402, 405, 412, 413, 415, 548, 421, 554, 555, 427, 557, 429, 560, 431, 562, 434, 565, 566, 567, 568, 569, 441, 573, 447, 450, 579, 580, 581, 451, 455, 456, 333, 342, 343, 344, 347, 348, 475, 354, 482, 377, 379]	0.34531	0.317568	0.0277427	0.188094	0.0151157	0.00121534	4.1593e-06	0.0991486	0.0266498	21	104	8	68	46	351	64	237	10	51	1	47	18	274	4	63	2	9	6	29	78	331	9	19	0	0	0	1	6
UXS1	ENSG00000115652.15	chr2	-	106164784	106166055	3AS	FALSE	4.35044e-08	1.66527e-11	[0, 9, 200, 4, 7, 3, 82, 199, 221, 38, 14, 190, 136, 198, 241, 359, 1, 216, 247, 308, 12, 124, 236, 251, 330, 382, 20, 24, 53, 64, 73, 207, 211, 226, 228, 294, 297, 298, 301, 306, 415, 15, 30, 42, 68, 97, 201, 220, 224, 235, 237, 240, 248, 253, 259, 267, 275, 276, 289, 291, 292, 369, 379, 391, 400, 401, 5, 6, 40, 55, 63, 67, 86, 98, 100, 119, 125, 158, 165, 181, 191, 203, 213, 218, 229, 238, 239,…	[2, 195, 202, 8, 25, 212, 31, 34, 23, 264, 46, 123, 138, 345, 107, 392, 104, 143, 153, 225, 331, 19, 22, 115, 129, 156, 310, 340, 349, 357, 362, 398, 65, 103, 128, 144, 157, 245, 317, 318, 348, 351, 389, 390, 431, 11, 13, 16, 21, 59, 60, 61, 76, 80, 87, 90, 93, 94, 101, 110, 114, 117, 120, 126, 131, 133, 137, 140, 142, 147, 149, 150, 151, 155, 160, 164, 167, 168, 171, 172, 174, 175, 177, 179, 180…	0.190214	0.21288	0.0226661	0.582824	0.016309	0.227203	0.00547468	0.411864	0.0386997	28	44	41	51	69	127	67	87	51	99	17	44	17	75	34	48	19	27	43	63	17	39	64	132	0	0	22	36	14
TRIM37	ENSG00000108395.14	chr17	-	59070947	59075646	3AS	TRUE	4.82278e-08	1.90562e-11	[3, 6, 0, 10, 5, 40, 2, 7, 290, 25, 12, 81, 13, 32, 14, 90, 20, 229, 313, 48, 111, 328, 392, 28, 49, 305, 23, 26, 119, 247, 336, 405, 506, 239, 317, 326, 329, 334, 359, 362, 385, 394, 406, 462, 505, 519, 35, 43, 87, 102, 143, 332, 356, 458, 478, 17, 62, 76, 125, 128, 141, 294, 324, 337, 345, 358, 389, 390, 429, 436, 459, 534, 11, 27, 33, 58, 71, 75, 80, 85, 109, 110, 117, 132, 215, 230, 243, 295,…	[45, 44, 63, 54, 66, 38, 461, 472, 479, 42, 468, 89, 41, 46, 555, 213, 262, 271, 549, 166, 550, 443, 444, 473, 231, 522, 275, 531, 277, 278, 280, 540, 285, 171, 172, 553, 178, 435, 438, 571, 64, 448, 67, 450, 197, 453, 205, 78, 211, 84, 91, 221, 222, 233, 237, 240, 248, 249, 251]	0.247335	0.223577	0.0237575	0.21195	0.00916689	0.00097614	4.40716e-09	0.0989973	0.0282178	0	7	19	90	16	124	21	74	2	14	1	12	0	40	2	6	1	2	0	5	1	3	3	15	0	0	0	0	0
SNRPN	ENSG00000128739.23	chr15	+	24962209	24967931	ES	FALSE	4.96678e-08	2.02385e-11	[0, 13, 7, 23, 12, 40, 21, 3, 1, 25, 26, 54, 44, 68, 39, 100, 20, 34, 35, 43, 48, 52, 58, 75, 152, 153, 156, 163, 164, 168, 176, 2, 8, 14, 16, 19, 24, 30, 31, 32, 33, 42, 53, 55, 56, 57, 60, 61, 62, 65, 67, 69, 70, 74, 76, 77, 78, 81, 84, 86, 89, 91, 93, 98, 137, 138, 140, 141, 142, 144, 145, 147, 148, 149, 150, 157, 159, 161, 162, 165, 169, 172, 174, 181, 185, 186, 188, 189]	[6, 15, 5, 111, 11, 108, 71, 101, 112, 79, 97, 115, 127, 128, 129, 131, 4, 139, 143, 154, 166, 170, 171, 173, 175, 179, 180, 182, 183, 184, 59, 80, 82, 92, 99, 104, 105, 110, 113, 114, 119, 120, 121, 122, 123, 124, 126, 190]	0.0811733	0.971429	0.890255	0.302106	0.0311109	0.0320668	7.26698e-07	0.173146	0.0271	13	30	9	49	19	45	90	116	36	98	12	131	4	130	5	123	4	30	7	15	14	55	2	5	1	1	1	3	3
PDHX	ENSG00000110435.12	chr11	+	34931484	34947505	3AS	TRUE	5.5358e-08	2.32407e-11	[3, 2, 1, 43, 14, 38, 45, 40, 29, 17, 47, 20, 13, 11, 19, 46, 65, 67, 15, 69, 83, 41, 0, 5, 7, 49, 68, 70, 90, 31, 75, 85, 98, 163, 16, 50, 52, 60, 76, 95, 112, 120, 121, 132, 139, 148, 161, 162, 8, 9, 10, 18, 22, 23, 35, 37, 39, 44, 51, 56, 57, 59, 61, 64, 66, 72, 73, 82, 88, 92, 93, 103, 107, 108, 114, 118, 119, 122, 127, 131, 133, 136, 138, 149, 155, 156, 164, 170, 172, 174]	[27, 28, 36, 117, 30, 167, 102, 105, 109, 110, 111, 124, 137, 144, 145, 146, 151, 154, 160, 165, 169, 100, 101, 104, 106, 113, 125]	0.0866551	1	0.913345	0.119719	0.00522629	0.00194034	0.000102896	0.0558825	0.00886538	20	70	19	78	25	124	17	87	8	59	8	84	1	109	4	30	4	14	0	15	2	34	2	9	0	0	0	3	2
CD2BP2	ENSG00000169217.9	chr16	-	30350770	30351547	ALJ	TRUE	5.66877e-08	2.44989e-11	[1, 9, 15, 58, 54, 19, 39, 2, 38, 63, 84, 43, 8, 25, 48, 83, 11, 34, 42, 49, 82, 5, 23, 27, 40, 41, 44, 46, 50, 51, 77, 79, 80, 81, 85, 0, 3, 4, 6, 7, 14, 17, 21, 26, 28, 29, 30, 33, 35, 36, 45, 47, 52, 53, 55, 56, 57, 59, 61, 66, 67, 68, 69, 74, 87, 89, 91, 92]	[10, 13, 32, 12, 20, 31, 62, 76, 37, 64, 73, 75, 16, 18, 22, 24, 60, 65, 70, 71, 72, 78, 86, 88, 90]	0.176573	0.843284	0.66671	0.435269	0.041868	0.0124577	0.000325697	0.203803	0.0623832	7	14	38	45	13	20	113	139	1	5	1	2	3	15	18	28	0	0	2	10	2	5	7	11	0	0	2	6	2
ZNF561	ENSG00000171469.11	chr19	-	9618166	9619431	3AS	FALSE	6.71076e-08	2.98308e-11	[3, 54, 39, 74, 48, 58, 112, 1, 139, 71, 61, 120, 119, 110, 116, 62, 69, 91, 142, 66, 190, 83, 145, 47, 64, 188, 201, 206, 81, 207, 208, 209, 210, 231, 137, 143, 157, 160, 167, 171, 179, 52, 55, 57, 60, 63, 189, 191, 72, 192, 194, 76, 196, 202, 218, 220, 222, 228, 233, 238, 239, 241, 244, 246]	[4, 10, 6, 9, 23, 2, 16, 123, 20, 12, 38, 8, 14, 21, 80, 138, 78, 11, 46, 90, 104, 118, 133, 108, 121, 26, 32, 36, 50, 51, 34, 7, 19, 53, 232, 15, 35, 135, 200, 22, 24, 28, 67, 93, 147, 148, 154, 162, 205, 5, 29, 59, 73, 77, 114, 126, 129, 134, 140, 146, 163, 164, 168, 174, 186, 204, 223, 234, 235, 236, 237, 243, 17, 18, 27, 30, 41, 43, 44, 65, 68, 75, 79, 82, 85, 86, 87, 88, 89, 92, 94, 96, 97, …	0.797619	0.346867	0.450752	0.612491	0.0184979	0.917802	0.00129668	0.762175	0.0322424	25	46	88	131	47	77	61	145	58	76	34	40	56	62	9	15	13	21	6	24	7	14	8	15	1	1	5	7	6
SNW1	ENSG00000100603.14	chr14	-	77737075	77738777	3AS	TRUE	7.51229e-08	3.43213e-11	[0, 3, 5, 58, 24, 33, 39, 56, 29, 57, 35, 32, 146, 14, 34, 149, 8, 48, 59, 88, 165, 25, 40, 45, 47, 49, 66, 67, 82, 111, 117, 173, 11, 18, 19, 42, 52, 55, 61, 65, 68, 86, 96, 98, 101, 122, 163, 164, 166, 175, 199, 204, 4, 7, 10, 13, 21, 26, 28, 41, 43, 50, 51, 62, 69, 77, 78, 85, 87, 89, 90, 91, 92, 93, 94, 99, 103, 104, 109, 110, 123, 127, 133, 137, 139, 142, 151, 153, 154, 157, 158, 169, 171, 1…	[12, 31, 114, 17, 118, 120, 147, 121, 130, 131, 128, 129, 134, 136, 138, 140, 141, 15, 143, 144, 145, 150, 156, 30, 159, 160, 162, 37, 185, 189, 193, 200, 201, 203, 211, 214, 215, 218, 116]	0.0556206	1	0.944379	0.123202	0.00575277	0.0070808	7.40653e-05	0.06163	0.00729861	4	50	15	41	23	112	27	86	39	158	4	108	4	86	6	43	0	19	7	46	4	61	19	103	0	2	1	28	11
ENOSF1	ENSG00000132199.20	chr18	-	683380	685920	3AS	FALSE	9.95321e-08	4.67022e-11	[15, 20, 84, 5, 12, 111, 117, 239, 8, 193, 265, 7, 10, 11, 14, 40, 58, 64, 77, 106, 108, 116, 122, 124, 137, 147, 156, 166, 173, 186, 192, 222, 229, 259, 0, 1, 3, 4, 9, 13, 16, 17, 18, 19, 21, 23, 24, 25, 26, 27, 28, 29, 32, 33, 35, 36, 38, 39, 41, 47, 49, 53, 55, 62, 71, 75, 79, 82, 83, 85, 87, 89, 90, 91, 92, 94, 95, 98, 104, 105, 107, 109, 110, 112, 113, 114, 115, 118, 119, 120, 123, 125, 128,…	[37, 63, 81, 80, 258, 50, 60, 69, 97, 158, 205, 210, 269, 274, 289, 43, 44, 45, 46, 48, 52, 56, 59, 61, 65, 66, 67, 68, 70, 76, 78, 86, 88, 93, 96, 99, 100, 101, 130, 134, 136, 140, 141, 142, 144, 155, 160, 179, 197, 203, 206, 209, 211, 212, 214, 227, 240, 260, 261, 263, 266, 267, 271, 272, 278, 279, 280, 281, 282, 283, 284, 286, 288, 292, 296, 297, 299, 300, 302, 305, 307]	0.662722	0.611111	0.0516108	0.484018	0.0175842	0.0250026	2.41417e-06	0.251641	0.0648403	1	2	1	13	2	5	8	10	1	1	0	0	1	5	0	2	1	1	9	14	0	2	2	2	0	0	2	2	9
NDRG3	ENSG00000101079.21	chr20	-	36651769	36653723	ALJ	TRUE	1.14602e-07	5.51883e-11	[0, 11, 18, 7, 17, 26, 2, 50, 1, 16, 52, 57, 34, 46, 40, 4, 25, 73, 3, 65, 75, 20, 47, 49, 53, 59, 61, 62, 69, 76, 80, 88, 90, 98, 5, 6, 9, 10, 12, 13, 14, 15, 19, 22, 23, 28, 31, 36, 38, 39, 41, 42, 43, 44, 45, 48, 51, 54, 55, 56, 58, 60, 63, 64, 66, 67, 68, 70, 71, 72, 74, 78, 81, 82, 85, 87, 89, 91, 93, 94, 95, 96, 97, 99, 100, 101, 103, 105, 106, 107, 108]	[21, 29, 27, 77, 24, 32, 102, 79, 30, 33, 35, 37, 104, 83, 84, 86, 92]	0.0470267	0.0429448	0.00408191	0.183843	0.011997	0.00432966	1.88654e-05	0.0874868	0.0189086	10	78	46	199	91	295	6	126	18	69	0	36	7	70	9	37	0	4	1	1	4	37	2	5	0	0	0	1	6
SLC7A7	ENSG00000155465.20	chr14	-	22773224	22773716	ALJ	TRUE	1.31115e-07	6.47591e-11	[330, 339, 345, 5, 183, 346, 363, 372, 118, 337, 65, 357, 80, 185, 116, 365, 367, 15, 127, 384, 414, 418, 444, 63, 192, 332, 378, 392, 409, 417, 419, 423, 425, 428, 438, 480, 498, 510, 550, 9, 48, 64, 117, 154, 155, 169, 207, 226, 227, 233, 257, 266, 267, 268, 269, 270, 271, 272, 273, 284, 308, 313, 327, 333, 342, 343, 344, 347, 348, 351, 354, 377, 379, 394, 397, 401, 402, 405, 412, 413, 415, 421…	[0, 28, 2, 39, 7, 17, 20, 38, 112, 52, 124, 6, 10, 13, 162, 167, 79, 88, 14, 46, 59, 75, 96, 50, 121, 24, 129, 35, 110, 4, 29, 97, 128, 54, 94, 208, 331, 22, 72, 168, 19, 58, 93, 99, 141, 149, 49, 3, 212, 229, 8, 41, 82, 122, 126, 213, 37, 53, 61, 123, 166, 178, 216, 516, 12, 36, 43, 68, 83, 85, 91, 100, 113, 119, 130, 137, 140, 201, 369, 443, 519, 11, 16, 25, 31, 55, 136, 144, 146, 147, 181, 193…	0.333333	0.34383	0.0104969	0.800449	0.0146445	0.975184	3.82853e-05	0.887535	0.0123388	84	105	59	69	305	356	173	238	41	52	46	47	252	290	60	64	7	9	23	29	254	336	10	20	0	0	1	1	28
TNPO3	ENSG00000064419.13	chr7	-	129005159	129014978	3AS	TRUE	1.31257e-07	6.645e-11	[0, 3, 1, 37, 95, 2, 6, 26, 53, 87, 160, 10, 9, 19, 138, 22, 70, 5, 13, 61, 80, 96, 107, 115, 78, 94, 108, 170, 27, 29, 41, 46, 104, 112, 177, 180, 42, 60, 82, 98, 114, 121, 144, 164, 182, 194, 216, 221, 226, 236, 241, 30, 47, 48, 62, 65, 68, 72, 77, 79, 85, 113, 116, 120, 133, 135, 151, 184, 185, 195, 206, 207, 209, 215, 219, 225, 237, 240, 246, 289, 7, 8, 15, 17, 18, 20, 21, 23, 24, 25, 39, 40,…	[57, 58, 55, 169, 158, 63, 179, 89, 251, 260, 261, 262, 263, 265, 267, 273, 275, 279, 152, 292, 165, 293, 168, 50, 51, 187, 188, 190, 66, 196, 69, 84, 86, 93, 239, 245, 248, 253, 255]	0.147074	0.899083	0.752009	0.160805	0.0123227	0.00167426	5.20362e-09	0.0855491	0.0192723	11	38	4	79	6	77	6	56	3	14	0	23	0	61	0	5	0	7	2	14	1	1	2	5	0	0	3	7	2
ZNF91	ENSG00000167232.14	chr19	-	23362725	23374637	3AS	TRUE	1.47493e-07	7.73331e-11	[30, 91, 48, 22, 186, 115, 180, 101, 140, 120, 154]	[16, 31, 114, 46, 20, 33, 45, 21, 167, 135, 164, 205, 29, 166, 189, 44, 201, 55, 78, 49, 53, 54, 58, 77, 153, 178, 56, 65, 68, 73, 163, 165, 169, 171, 174, 176, 179, 185, 194, 202, 204, 220, 242, 259, 262, 13, 15, 19, 25, 32, 47, 51, 60, 61, 63, 66, 67, 69, 70, 72, 76, 105, 106, 116, 161, 162, 168, 170, 172, 175, 177, 182, 183, 184, 187, 188, 191, 192, 193, 197, 198, 199, 206, 209, 211, 213, 214,…	0.104972	0.260392	0.15542	0.923447	0.0049925	0.263337	0.00821827	0.680197	0.0905128	198	199	190	204	146	166	245	263	151	158	33	37	12	21	8	8	6	6	3	3	1	1	1	1	0	0	0	0	1
NSMCE4A	ENSG00000107672.15	chr10	-	121974081	121974873	3AS	TRUE	1.47493e-07	7.83124e-11	[4, 0, 25, 1, 45, 36, 53, 57, 10, 17, 47, 37, 40, 7, 67, 59, 79, 108, 39, 55, 99, 35, 38, 49, 86, 43, 46, 48, 180, 71, 80, 91, 95, 5, 9, 13, 146, 157, 158, 159, 160, 161, 34, 163, 42, 164, 50, 173, 52, 176, 181, 188, 165, 191, 66, 166, 74, 75, 168, 81, 169, 85, 87, 88, 93, 94, 96, 102, 104, 120, 126, 192, 195, 196]	[16, 30, 23, 15, 26, 54, 115, 109, 22, 24, 28, 123, 11, 27, 135, 140, 183, 112, 113, 128, 129, 131, 132, 134, 136, 138, 12, 139, 142, 143, 144, 145, 21, 150, 29, 151, 153, 156, 174, 182, 185, 186, 189, 190, 64, 147, 110, 149, 114, 125, 121, 122, 152, 127]	0.762896	1	0.237104	0.508626	0.09412	0.0122369	5.93641e-07	0.249496	0.100575	85	89	16	37	50	103	97	109	91	126	0	84	6	130	19	30	7	7	2	2	0	3	2	4	0	1	0	0	2
TOR1AIP2	ENSG00000169905.13	chr1	-	179865854	179877692	3AS	TRUE	1.49244e-07	8.10846e-11	[9, 15, 4, 6, 85, 35, 78, 16]	[26, 29, 18, 20, 19, 23, 115, 94, 89, 41, 61, 57, 27, 127, 31]	0.979167	1	0.0208333	0.749936	3.42812e-05	0		0.431437	0.138293	1	1	1	5	0	0	3	3	3	3	0	0	0	1	1	1	0	0	1	1	0	0	8	10	0	0	1	1	2
TUT4	ENSG00000134744.14	chr1	-	52436963	52438219	3AS	FALSE	1.65863e-07	9.41656e-11	[2, 93, 14, 209, 6, 41, 204, 91, 186, 292, 67, 69, 0, 53, 278, 291, 365, 34, 239, 62, 618, 283, 397, 518, 201, 230, 392, 396, 398, 492, 7, 521, 13, 573, 1093, 152, 764, 366, 393, 394, 405, 439, 452, 969, 976, 509, 1, 566, 1078, 572, 582, 73, 80, 90, 617, 117, 153, 173, 688, 695, 195, 721, 214, 223, 232, 749, 241, 245, 257, 776, 288, 801, 849, 341, 347, 867, 872, 371, 379, 442, 449, 454, 459, 462,…	[3, 32, 92, 98, 35, 60, 4, 37, 296, 89, 119, 177, 9, 5, 519, 30, 78, 206, 11, 65, 85, 399, 723, 61, 83, 88, 570, 115, 118, 127, 132, 187, 226, 261, 287, 300, 455, 789, 814, 858, 892, 8, 33, 57, 82, 130, 376, 435, 852, 856, 1036, 31, 55, 372, 395, 404, 501, 511, 574, 575, 599, 614, 629, 747, 777, 812, 859, 868, 869, 871, 873, 889, 890, 891, 898, 1089, 12, 36, 39, 64, 68, 79, 84, 94, 99, 112, 122, …	0.328395	0.281841	0.0465545	0.736853	0.00691651	0.432868	2.28867e-05	0.592805	0.0241893	78	113	81	111	148	180	85	96	41	44	25	44	27	41	6	7	1	1	4	4	7	9	3	4	0	0	0	0	1
CCDC18-AS1	ENSG00000223745.8	chr1	-	93337483	93338229	3AS	TRUE	1.65863e-07	9.42103e-11	[47, 55, 149, 30, 415, 280, 804, 42, 171, 905, 658, 655, 1223, 1307, 496, 1139, 492, 930, 1215, 173, 263, 277, 1236, 1297, 379, 1132, 1157, 1255, 1267, 1318, 1366, 18, 29, 194, 202, 433, 439, 443, 548, 728, 854, 864, 889, 1092, 1095, 1228, 1280, 1310, 1320, 1376, 71, 214, 556, 569, 652, 766, 807, 822, 1043, 1087, 1091, 1128, 1135, 1140, 1153, 1159, 1175, 1245, 1247, 1278, 1313, 1322, 1327, 1331, …	[52, 12, 204, 313, 137, 101, 136, 217, 6, 262, 304, 413, 226, 301, 144, 193, 222, 91, 351, 418, 85, 190, 345, 403, 627, 853, 216, 232, 363, 174, 192, 250, 327, 376, 595, 754, 904, 1065, 224, 260, 286, 400, 460, 473, 486, 495, 1040, 1048, 1152, 1336, 1386, 20, 98, 145, 164, 181, 185, 188, 189, 199, 210, 212, 213, 235, 237, 240, 245, 256, 261, 270, 287, 293, 311, 316, 326, 392, 429, 448, 456, 467, …	1	1	0	0.325863	0.0155049	0.840629	1.68326e-05	0.55653	0.0634496	31	165	38	155	36	157	39	212	35	106	34	58	16	51	20	67	2	3	0	3	4	7	0	0	0	0	0	0	3
RNF2	ENSG00000121481.11	chr1	+	185087640	185091578	3AS	TRUE	1.77304e-07	1.05087e-10	[1, 2, 17, 5, 0, 25, 27, 40, 32, 30, 38, 41, 12, 33, 7, 22, 51, 52, 20, 21, 23, 26, 28, 49, 53, 3, 4, 6, 19, 36, 37, 45, 46, 47, 48, 50, 55, 62, 63, 64, 65, 66, 67, 72, 73, 75]	[8, 9, 14, 54, 39, 35, 56, 57, 13, 58, 69, 10, 11, 15, 24, 29, 43, 44, 59, 61, 68, 74, 76]	0.101449	1	0.898551	0.287871	0.00698543	0.0629074	6.92135e-06	0.182832	0.0179806	19	58	15	41	10	39	4	37	22	59	5	28	15	74	11	17	3	7	5	15	9	14	7	22	0	3	1	7	8
WASHC4	ENSG00000136051.15	chr12	+	105120597	105121100	3AS	FALSE	1.77304e-07	1.04796e-10	[3, 6, 32, 29, 13, 41, 124, 74, 97, 7, 57, 75, 0, 30, 103, 87, 46, 51, 104, 143, 140, 184, 197, 141, 223, 251, 607, 164, 209, 250, 273, 365, 70, 101, 121, 129, 130, 132, 154, 176, 186, 194, 201, 301, 332, 361, 494, 5, 24, 28, 84, 85, 88, 118, 125, 157, 160, 198, 242, 328, 423, 469, 476, 497, 8, 16, 34, 35, 49, 77, 96, 105, 126, 138, 158, 159, 180, 185, 200, 202, 206, 227, 228, 236, 265, 270, 281,…	[17, 54, 27, 134, 73, 14, 240, 375, 67, 71, 234, 578, 144, 379, 410, 4, 45, 151, 177, 212, 420, 456, 466, 479, 483, 520, 21, 26, 541, 33, 62, 76, 598, 613, 107, 122, 156, 163, 166, 231, 249, 278, 284, 317, 329, 345, 408, 419, 424, 443, 449, 463, 471, 472, 477, 478, 480, 482, 484, 491, 498, 500, 512, 518, 521, 12, 527, 529, 530, 20, 532, 544, 550, 552, 555, 47, 48, 50, 565, 566, 567, 569, 61, 63, …	0.384474	1	0.615526	0.374349	0.0195137	0.104093	0.000332153	0.235717	0.0259466	49	81	56	90	79	174	33	79	12	33	22	96	18	59	5	7	1	5	4	7	3	10	6	18	0	0	0	1	4
PIP5K1B	ENSG00000107242.20	chr9	+	68818545	68822614	3AS	TRUE	1.94957e-07	1.17957e-10	[0, 1, 13, 4, 3, 2, 29, 11, 9, 34, 84, 24, 27, 36, 75, 57, 99, 33, 37, 38, 147, 35, 66, 90, 115, 123, 39, 41, 47, 54, 55, 152, 240, 270, 10, 58, 59, 68, 69, 72, 101, 126, 141, 144, 162, 169, 194, 195, 201, 211, 224, 228, 237, 272, 283, 15, 23, 25, 28, 40, 42, 56, 60, 64, 70, 73, 91, 92, 93, 94, 102, 103, 105, 114, 138, 145, 183, 185, 197, 229, 248, 279, 289, 298, 304, 317, 6, 19, 20, 22, 26, 31, …	[17, 14, 21, 18, 246, 275, 285, 249, 261, 267, 12, 269, 277, 281, 291, 164, 299, 300, 179, 309, 189, 320, 241, 251]	0.0967867	0.131387	0.0346002	0.0984828	0.00234008	0.00286565	1.02791e-06	0.050149	0.00537589	2	39	4	63	2	29	3	29	1	16	0	25	4	157	0	1	0	32	1	21	2	7	8	78	0	3	4	26	6
NDRG3	ENSG00000101079.21	chr20	-	36653701	36656359	3AS	TRUE	2.12278e-07	1.31059e-10	[0, 11, 18, 7, 26, 2, 1, 57, 34, 46, 40, 4, 25, 73, 3, 65, 53, 59, 61, 62, 69, 80, 88, 90, 98, 9, 10, 13, 14, 15, 19, 23, 28, 31, 38, 39, 41, 42, 44, 45, 51, 55, 56, 58, 60, 63, 64, 66, 67, 68, 70, 71, 74, 81, 85, 87, 91, 93, 94, 95, 96, 97, 99, 100, 101, 103, 107]	[21, 29, 27, 24, 30, 32, 47, 79, 102, 22, 33, 35, 37, 78, 82, 83, 84, 86, 92, 104]	0.0453839	0.0487805	0.00339659	0.187661	0.0121804	0.00510805	3.76344e-05	0.0894406	0.019353	10	77	45	194	92	292	6	124	18	68	0	34	6	67	9	37	0	4	1	1	4	37	2	5	0	0	0	1	6
CNTRL	ENSG00000119397.17	chr9	+	121169816	121173356	3AS	TRUE	2.18282e-07	1.37461e-10	[44, 767, 80, 147, 77, 739, 108, 769, 133, 777, 142, 660, 665, 670, 679, 810, 43, 814, 54, 957, 198, 74, 76, 81, 867, 996, 1003, 878, 881, 122]	[4, 3, 99, 46, 45, 114, 402, 29, 37, 30, 22, 60, 162, 239, 295, 62, 121, 127, 180, 229, 174, 269, 281, 420, 428, 431, 442, 635, 651, 712, 887, 10, 26, 57, 101, 160, 252, 256, 268, 271, 296, 308, 330, 331, 368, 418, 437, 453, 517, 562, 636, 743, 759, 8, 38, 40, 139, 178, 202, 204, 212, 217, 223, 248, 260, 320, 321, 327, 361, 379, 406, 413, 434, 438, 443, 444, 451, 477, 482, 528, 549, 564, 586, 595…	0.290323	0.4406	0.150277	0.819105	0.00132878	0.996068	0.000330042	0.907559	0.0218428	18	21	41	48	34	40	40	46	7	9	10	10	25	28	2	4	0	0	0	0	0	0	1	1	0	0	0	0	0
PPP2R5A	ENSG00000066027.12	chr1	+	212342280	212345802	3AS	TRUE	2.45009e-07	1.57317e-10	[0, 61, 17, 44, 11, 37, 80, 57, 72, 117, 5, 79, 88, 188, 10, 63, 198, 202, 46, 50, 130, 201, 209, 211, 216, 290, 6, 8, 16, 69, 73, 93, 105, 144, 167, 199, 218, 220, 246, 298, 299, 1, 2, 3, 7, 12, 13, 14, 18, 19, 20, 21, 28, 36, 38, 42, 47, 58, 70, 74, 76, 78, 85, 87, 92, 96, 97, 109, 111, 118, 119, 121, 132, 134, 136, 173, 182, 191, 197, 200, 208, 210, 212, 215, 219, 229, 245, 250, 263, 271, 281,…	[48, 27, 35, 29, 129, 34, 33, 228, 243, 259, 49, 152, 251, 262, 31, 116, 242, 247, 257, 175, 297, 145, 151, 213, 231, 98, 122, 128, 142, 161, 169, 178, 180, 221, 230, 234, 236, 255, 269, 273, 277, 278, 285, 286, 22, 25, 32, 39, 40, 41, 43, 45, 59, 81, 113, 127, 133, 141, 143, 147, 153, 154, 156, 164, 170, 171, 174, 176, 183, 187, 189, 194, 214, 223, 225, 226, 232, 233, 239, 240, 241, 249, 252, 25…	0.310897	1	0.689103	0.517181	0.0366384	0.0797009	0.00425164	0.295284	0.0647256	14	17	20	33	5	12	6	8	16	25	5	30	7	21	2	6	2	2	12	19	13	20	136	185	0	0	3	4	4
GTF2I	ENSG00000263001.7	chr7	+	74716950	74718878	3AS	TRUE	2.61743e-07	1.71294e-10	[5, 7, 12, 1, 41, 62, 65, 123, 17, 96, 67, 29, 79, 169, 459, 436, 56, 104, 42, 373, 404, 191, 179, 40, 141, 186, 63, 415, 435, 490, 503, 34, 98, 210, 414, 702, 144, 357, 394, 418, 511, 514, 614, 691, 693, 700, 22, 84, 119, 162, 203, 288, 473, 564, 703, 726, 830, 839, 187, 207, 211, 217, 243, 284, 334, 352, 429, 517, 591, 620, 626, 733, 803, 818, 2, 37, 99, 130, 136, 153, 160, 168, 184, 189, 192, …	[27, 94, 13, 87, 386, 97, 122, 128, 405, 124, 143, 686, 306, 819, 314, 701, 93, 120, 133, 272, 663, 291, 712, 850, 213, 86, 346, 102, 366, 385, 384, 132, 388, 391, 137, 266, 393, 140, 268, 273, 397, 275, 159, 294, 682, 299, 302, 303, 816, 312, 317, 319, 321, 324, 328, 331, 332, 845, 847, 81, 851, 724, 343, 860, 353, 356, 362, 112, 368, 116, 118, 375, 903]	0.147018	0.0921409	0.0548768	0.20267	0.00899339	0.0107615	4.1444e-05	0.09657	0.0165142	19	63	41	190	34	222	59	176	5	19	2	26	8	124	0	6	3	10	3	14	0	6	0	18	0	0	0	2	0
UBC	ENSG00000150991.15	chr12	-	124912050	124912278	IR	TRUE	3.07452e-07	2.05003e-10	[2, 108, 19, 9, 32, 27, 130, 194, 435, 333, 385, 263, 398, 468, 353, 3, 395, 531, 406, 537, 503, 773, 392, 394, 396, 794, 668, 541, 797, 543, 547, 682, 555, 683, 684, 686, 54, 824, 569, 571, 573, 574, 447, 577, 67, 587, 715, 207, 336, 719, 594, 340, 598, 730, 351, 355, 359, 488, 745, 746, 368, 498, 371, 372, 755, 118, 762, 765, 382, 383, 847]	[0, 4, 6, 10, 14, 5, 37, 25, 13, 21, 11, 8, 39, 23, 30, 16, 15, 145, 42, 55, 74, 44, 112, 40, 58, 115, 144, 36, 24, 111, 233, 80, 82, 237, 97, 309, 125, 75, 123, 129, 255, 76, 65, 817, 7, 81, 92, 137, 171, 214, 219, 62, 113, 114, 197, 231, 87, 148, 200, 232, 442, 617, 60, 105, 183, 202, 284, 289, 457, 29, 78, 84, 192, 205, 266, 270, 319, 331, 427, 615, 626, 655, 708, 26, 43, 90, 106, 117, 121, 13…	0.00449653	0.00369546	0.000801067	0.926687	0.0125207	0.992614	2.5662e-05	0.956345	0.00452016	4337	4347	3109	3128	18782	18826	12443	19332	15140	15189	5403	5431	20891	21061	12189	22360	1057	1076	8416	8754	10489	10531	4411	7466	3	3	1675	1691	4889
UBC	ENSG00000150991.15	chr12	-	124911647	124912050	ALJ	TRUE	3.12093e-07	2.11952e-10	[0, 4, 6, 10, 17, 14, 1, 5, 20, 37, 25, 57, 28, 22, 13, 337, 21, 11, 18, 228, 8, 39, 31, 23, 33, 61, 30, 226, 256, 16, 15, 145, 42, 55, 85, 35, 74, 44, 112, 190, 40, 51, 58, 115, 144, 36, 335, 24, 195, 95, 111, 193, 86, 233, 53, 93, 124, 80, 82, 143, 225, 237, 97, 309, 484, 125, 75, 123, 129, 158, 165, 255, 76, 357, 65, 99, 153, 817, 7, 79, 81, 92, 104, 135, 137, 171, 214, 219, 554, 62, 113, 114,…	[2, 108, 19, 9, 32, 27, 130, 194, 435, 333, 385, 263, 398, 468, 353, 3, 395, 531, 406, 537, 503, 773, 392, 394, 396, 794, 668, 541, 797, 543, 547, 682, 555, 683, 684, 686, 54, 824, 569, 571, 573, 574, 447, 577, 67, 587, 715, 207, 336, 719, 594, 340, 598, 730, 351, 355, 613, 359, 488, 745, 746, 368, 498, 371, 372, 755, 118, 762, 765, 382, 383, 847]	0.00390303	0.00449632	0.000593287	0.0716523	0.0120332	0.00732697	2.51993e-05	0.0426984	0.00432822	10	4361	19	3153	44	18878	6889	19538	49	15276	28	5461	170	21268	10171	22845	19	1090	338	9008	42	10591	3055	7561	0	6	16	1729	17
ELP2	ENSG00000134759.14	chr18	+	36145034	36145947	3AS	TRUE	3.61741e-07	2.50136e-10	[2, 13, 14, 22, 28, 0, 19, 21, 23, 98, 7, 26, 12, 60, 27, 33, 128, 159, 9, 61, 78, 157, 247, 47, 10, 214, 271, 188, 362, 75, 163, 178, 5, 6, 135, 142, 150, 175, 193, 261, 481, 8, 17, 76, 82, 160, 170, 172, 176, 209, 211, 233, 234, 274, 287, 307, 376, 433, 458, 1, 3, 34, 51, 66, 67, 77, 80, 99, 102, 121, 129, 137, 154, 168, 180, 194, 197, 216, 220, 228, 231, 241, 249, 267, 275, 278, 279, 281, 286,…	[25, 445, 37, 65, 97, 520, 93, 123, 222, 399, 480, 516, 46, 53, 575, 86, 91, 110, 131, 669, 248, 479, 530, 573, 89, 621, 379, 470, 488, 492, 504, 506, 511, 512, 518, 523, 525, 531, 533, 535, 536, 539, 540, 543, 544, 546, 35, 39, 552, 41, 42, 554, 44, 556, 45, 567, 569, 58, 63, 576, 577, 580, 583, 585, 88, 92, 96, 101, 104, 619, 641, 138, 651, 652, 655, 657, 664, 169, 185, 698, 189, 701, 705, 707,…	0.203665	0.966942	0.763277	0.173932	0.00425483	0.0204117	0.000182021	0.0862777	0.00943044	11	80	19	94	32	113	18	70	23	96	7	110	13	62	14	52	0	9	0	4	3	15	3	8	0	0	0	1	1
SMNDC1	ENSG00000119953.14	chr10	-	110298790	110300546	3AS	FALSE	3.73405e-07	2.72033e-10	[4, 1, 35, 26, 14, 7, 82, 101, 70, 56, 81, 74, 78, 53, 47, 63, 39, 61, 73, 92, 95, 3, 134, 8, 138, 140, 24, 28, 50, 51, 55, 86, 144, 40, 171, 64, 71, 100, 122, 129, 145, 148, 150, 152, 153, 154, 163, 164, 165, 168, 42, 172, 58, 75, 77, 83, 89, 91, 96, 98, 109, 111, 115, 118, 123]	[17, 27, 103, 38, 13, 67, 41, 106, 21, 105, 18, 147, 155, 125, 158, 174]	0.997387	0.995516	0.00187163	0.247048	0.0220081	0.0247487	6.94331e-07	0.140577	0.0232359	32	55	5	46	16	136	24	81	18	62	0	30	4	73	4	10	2	7	14	43	4	42	18	111	0	0	3	7	5
RUBCNL	ENSG00000102445.20	chr13	-	46368615	46368732	3AS	TRUE	3.73405e-07	2.68941e-10	[125, 80, 9, 139, 59, 131, 178, 43, 132, 144, 386, 207, 133, 122, 362, 246, 88, 346, 227, 618, 186, 675, 137, 234, 199, 1990, 740, 190, 615, 865, 38, 378, 256, 159, 191, 534, 154, 56, 153, 110, 321, 650, 206, 243, 240, 1978, 452, 537, 596, 415, 1260, 174, 176, 317, 193, 311, 405, 329, 712, 383, 1216, 343, 355, 511, 301, 418, 1133, 423, 1116, 120, 391, 566, 114, 603, 731, 276, 822, 1023, 644, 424,…	[204, 65, 73, 157, 1668, 395, 510, 1147, 2089, 3400, 3360, 1971, 479, 1997, 1761, 487, 1280, 904, 1658, 3070, 3550, 2448, 3486, 2346, 3026, 3391, 2145, 3423, 416, 2148, 3475, 2792, 3402, 458, 3458, 3591, 2451, 568, 2845, 7, 729, 3361, 1397, 1129, 3352, 3408, 3464, 3495, 3505, 3578, 3654, 3702, 3736, 4153, 4461, 662, 920, 1159, 3500, 3525, 3527, 3548, 3567, 1582, 3871, 4222, 2458, 3446, 3462, 3470…	0.994011	0.99742	0.00340915	0.145024	0.00981433	0.0250721	1.57181e-05	0.085668	0.006056	60	463	2427	6158	149	2231	790	2907	82	792	324	3037	17	565	13	175	1	3	4	7	2	23	0	2	0	0	0	0	1
DYNLL1	ENSG00000088986.11	chr12	+	120496216	120496415	3AS	FALSE	3.73405e-07	2.6871e-10	[3, 7, 16, 12]	[2, 8, 13]	0.00210526	0.00332226	0.001217	0.539817	0.00182324	0.111082	5.77341e-06	0.285166	0.0384071	1	2	3	8	3	6	0	1	4	6	1	11	0	2	9	13	3	7	0	0	1	2	0	1	102	174	0	2	6
ZFAND5	ENSG00000107372.13	chr9	-	72363606	72364695	3AS	TRUE	3.93473e-07	2.91512e-10	[0, 51, 6, 33, 48, 14, 64, 53, 108, 86, 98, 242, 19, 190, 152, 65, 85, 227, 101, 46, 66, 198, 77, 111, 261, 134, 157, 47, 218, 128, 256, 265, 138, 270, 271, 150, 160, 41, 43, 173, 175, 176, 59, 187, 67, 192, 69, 200, 203, 204, 205, 207, 214, 89, 219, 94, 228, 230, 231, 106, 237, 238, 255, 277, 278]	[1, 171, 23, 117, 142, 26, 201, 141, 146, 268, 236, 273, 18, 22, 250, 220]	0.198996	1	0.801004	0.164742	0.0128588	0.0116457	3.58403e-05	0.0899938	0.0126055	5	16	1	62	10	88	2	65	8	33	0	16	2	67	1	23	0	7	8	14	10	46	29	107	0	0	26	67	14
TMEM14C	ENSG00000111843.14	chr6	+	10723241	10724569	3AS	FALSE	4.25717e-07	3.20657e-10	[0, 25, 6, 7, 12, 18, 20, 21, 22, 35]	[4, 32, 10, 26, 27, 28]	0.042328	0.0425532	0.000225149	0.611862	0.0141415	0.0217362	1.22604e-06	0.303549	0.0845631	1	1	1	2	0	1	0	1	0	1	1	2	0	2	2	4	5	6	5	7	1	2	9	18	0	0	0	1	9
NDRG3	ENSG00000101079.21	chr20	-	36651769	36653701	ALJ	TRUE	4.38019e-07	3.38633e-10	[21, 17, 50, 29, 27, 24, 75, 77, 30, 32, 47, 49, 53, 69, 76, 79, 98, 102, 12, 22, 33, 35, 37, 39, 42, 45, 48, 51, 54, 55, 56, 67, 72, 78, 81, 82, 83, 84, 86, 89, 92, 99, 104, 105, 106, 108]	[0, 11, 18, 7, 26, 2, 1, 16, 52, 57, 34, 46, 40, 4, 25, 73, 3, 65, 20, 59, 61, 62, 80, 88, 90, 5, 6, 9, 10, 13, 14, 15, 19, 23, 28, 31, 36, 38, 41, 43, 44, 58, 60, 63, 64, 66, 68, 70, 71, 74, 85, 87, 91, 93, 94, 95, 96, 97, 100, 101, 103, 107]	0.0911392	0.0412148	0.0499245	0.792275	0.00844296	0.975616	0.000115228	0.887851	0.0129814	67	78	149	199	203	295	118	126	50	69	34	36	61	70	28	37	4	4	0	1	33	37	3	5	0	0	1	1	7
CDK8	ENSG00000132964.12	chr13	+	26396354	26397152	3AS	TRUE	4.38019e-07	3.4074e-10	[1, 0, 3, 5, 29, 63, 14, 9, 6, 69, 12, 11, 45, 21, 71, 2, 17, 39, 4, 15, 19, 48, 58, 86, 10, 26, 33, 49, 52, 60, 61, 62, 75, 76, 77, 113, 118, 123, 7, 8, 13, 16, 20, 28, 31, 34, 36, 38, 40, 41, 42, 43, 44, 46, 47, 50, 51, 54, 56, 59, 65, 66, 67, 68, 79, 81, 84, 85, 87, 88, 89, 91, 94, 96, 102, 103, 106, 108, 111, 112, 114, 115, 116, 117, 120, 121, 125, 126]	[23, 24, 18, 35, 93, 98, 100, 22, 25, 30, 32, 53, 55, 90, 95, 97, 99, 119, 122]	0.13578	1	0.86422	0.176001	0.0109736	0		0.0929048	0.0258637	0	3	5	20	10	46	11	26	0	5	1	1	1	33	1	2	0	0	2	2	1	2	1	9	0	0	2	5	0
CD2BP2	ENSG00000169217.9	chr16	-	30351547	30352505	IR	TRUE	4.59943e-07	3.63475e-10	[10, 13, 32, 12, 20, 58, 38, 63, 31, 62, 76, 37, 41, 44, 64, 73, 75, 77, 16, 18, 22, 24, 59, 60, 61, 65, 66, 67, 68, 69, 70, 71, 72, 78, 86, 88, 90]	[1, 9, 15, 54, 19, 2, 84, 43, 8, 25, 83, 11, 34, 42, 49, 82, 5, 23, 27, 40, 50, 51, 79, 80, 81, 85, 0, 3, 4, 6, 7, 14, 17, 21, 26, 28, 29, 30, 33, 36, 45, 47, 52, 53, 55, 56, 57, 87, 89, 91, 92]	0.815789	0.121154	0.694636	0.497334	0.0692159	0.978094	0.000406932	0.746628	0.0868595	4	14	3	45	2	19	7	137	4	5	1	2	11	14	7	28	0	0	6	8	3	5	4	11	0	0	4	6	0
SMNDC1	ENSG00000119953.14	chr10	-	110298790	110303467	3AS	FALSE	4.88029e-07	3.91696e-10	[0, 2, 25, 22, 34, 29, 49, 19, 37, 5, 6, 66, 112, 30, 137, 11, 15, 142, 45, 46, 65, 79, 102, 124, 126, 128, 130, 135, 12, 139, 141, 20, 149, 156, 159, 160, 161, 162, 167, 169, 170, 68, 72, 76, 84, 93, 97, 104, 107, 114, 116, 120]	[17, 16, 31, 27, 36, 69, 103, 38, 52, 33, 117, 119, 41, 54, 67, 106, 108, 131, 133, 18, 146, 147, 155, 158, 105, 113, 125, 174]	0.254053	0.994987	0.740935	0.166958	0.00713627	0.0260782	0.000424903	0.0939491	0.00912183	45	114	19	113	37	206	45	177	40	189	4	117	6	92	9	44	5	14	15	99	10	69	25	123	0	0	4	14	9
GSAP	ENSG00000186088.16	chr7	-	77314489	77320724	3AS	TRUE	4.9972e-07	4.07249e-10	[0, 8, 2, 38, 29, 32, 36, 55, 26, 46, 94, 41, 67, 18, 35, 133, 483, 163, 409, 47, 237, 257, 45, 380, 1, 24, 54, 443, 651, 107, 110, 545, 112, 168, 341, 20, 25, 71, 95, 360, 456, 467, 158, 326, 345, 568, 736, 64, 103, 111, 578, 72, 268, 401, 797, 22, 128, 383, 478, 550, 592, 1290, 57, 352, 361, 392, 403, 15, 74, 340, 351, 44, 66, 119, 145, 349, 441, 477, 553, 48, 125, 277, 468, 816, 63, 186, 368, …	[82, 336, 440, 541, 374, 1235, 53, 997, 1430, 1443, 1502, 1196, 1493, 1275, 1280, 1398, 1464, 1359, 1429, 1445, 1246, 1360, 1540, 91, 138, 480, 790, 822, 1219, 1392, 1467, 1598, 84, 462, 722, 1355, 1374, 1382, 1403, 1422, 1497, 1533, 1668, 1736, 869, 1356, 1357, 1369, 1651, 1662, 1682, 1687, 1692, 1756, 2124, 135, 469, 496, 792, 1373, 1381, 1451, 1469, 1487, 1512, 1550, 1559, 1566, 1664, 1683, 17…	0.746345	1	0.253655	0.37657	0.0246147	0.0284032	0.000231565	0.209404	0.0416605	112	213	468	835	221	583	222	389	69	194	54	354	40	312	23	61	4	8	4	11	3	19	1	1	0	0	0	0	4
WASHC5	ENSG00000164961.16	chr8	-	125038959	125039794	3AS	TRUE	5.14063e-07	4.25286e-10	[0, 1, 117, 24, 4, 13, 19, 9, 38, 34, 339, 10, 11, 12, 14, 57, 128, 5, 164, 53, 106, 109, 122, 45, 69, 101, 17, 66, 157, 227, 345, 441, 108, 139, 163, 187, 7, 26, 105, 129, 132, 133, 136, 198, 206, 223, 288, 353, 8, 27, 119, 155, 166, 177, 182, 183, 304, 309, 346, 359, 442, 473, 476, 22, 48, 54, 72, 94, 111, 131, 137, 138, 142, 143, 165, 172, 184, 191, 200, 202, 208, 294, 374, 375, 392, 394, 435,…	[6, 103, 83, 120, 249, 352, 58, 85, 95, 169, 303, 344, 104, 110, 265, 281, 296, 297, 298, 393, 409, 512, 516, 518, 35, 37, 90, 100, 102, 118, 148, 167, 194, 218, 261, 266, 269, 280, 291, 299, 300, 312, 332, 379, 384, 398, 400, 456, 513, 514, 517, 519, 32, 36, 40, 41, 43, 47, 59, 75, 77, 78, 79, 80, 84, 87, 88, 91, 92, 97, 107, 114, 116, 121, 123, 124, 141, 168, 173, 180, 197, 254, 258, 259, 260, …	0.141956	1	0.858044	0.172234	0.00775371	0.0185502	0.000297224	0.0949517	0.0118263	7	62	35	159	31	199	21	90	8	49	5	116	4	106	1	14	5	18	2	15	6	24	15	42	0	0	2	2	5
SUN1	ENSG00000164828.18	chr7	+	849603	849922	3AS	TRUE	5.16577e-07	4.33744e-10	[4, 5, 27, 13, 15, 327, 32, 134, 23, 338, 14, 78, 62, 315, 80, 356, 378, 40, 117, 250, 304, 139, 223, 372, 33, 93, 197, 335, 389, 443, 471, 39, 57, 108, 135, 370, 398, 433, 510, 551, 590, 748, 243, 331, 342, 365, 390, 413, 423, 520, 526, 563, 55, 568, 63, 576, 587, 595, 125, 180, 752, 284, 357, 363, 419, 435, 439, 448, 453, 475, 489, 534, 541, 53, 566, 569, 652, 198, 203, 714, 235, 753, 757, 761,…	[133, 222, 83, 238, 122, 391, 75, 116, 722, 191, 252, 644, 691, 699, 244, 589, 705, 768, 292, 344, 112, 636, 131, 155, 703, 739, 229, 746, 246, 759, 255, 258, 259, 260, 802, 425, 42, 91, 114, 115, 119, 121, 123, 124, 147, 152, 158, 167, 688, 689, 695, 185, 698, 706, 712, 715, 717, 718, 724, 726, 729, 730, 736, 737, 232, 236, 242, 755, 756, 248, 760, 765, 257, 773, 793, 794, 796, 798, 817, 823, 82…	0.450642	0.997468	0.546826	0.335459	0.0195308	0.0267511	8.28917e-05	0.142102	0.0271032	0	3	101	186	24	50	107	183	1	1	0	0	21	83	0	1	0	0	0	0	0	1	1	1	0	0	0	0	0
STAU2	ENSG00000040341.18	chr8	-	73709162	73738283	3AS	FALSE	5.2888e-07	4.50605e-10	[18, 11, 23, 93, 32, 22, 41, 47, 124, 207, 26, 135, 137, 58, 122, 222, 113, 285, 289, 322, 338, 513, 311, 428, 72, 123, 187, 239, 242, 269, 274, 293, 307, 314, 432, 434, 453, 512, 12, 525, 15, 19, 531, 533, 65, 75, 88, 91, 94, 111, 140, 154, 156, 158, 159, 175, 181, 183, 186, 192, 217, 220, 226, 241, 245, 248, 266, 273, 275, 278, 279, 282, 284, 297, 306, 325, 354, 361, 364, 371, 373, 404, 409, 41…	[31, 45, 190, 89, 37, 288, 295, 39, 462, 339, 345, 219, 291, 292, 324, 83, 287, 298, 488, 491, 365, 494, 496, 500, 515, 517, 519, 523, 529, 530, 532, 296, 309, 55, 56, 317, 330, 461, 334, 463, 337, 342, 470, 92, 346, 350, 352, 355, 357, 485, 106, 366, 497, 507, 508, 509]	0.0520156	0.066879	0.0148634	0.399342	0.0211948	0.0465009	0.00126793	0.212391	0.0429863	27	51	18	37	22	88	39	58	36	82	4	28	0	22	5	13	20	37	7	18	3	5	0	1	0	2	0	0	2
ZBED5	ENSG00000236287.8	chr11	-	10852796	10855118	ALJ	TRUE	5.40135e-07	4.66864e-10	[0, 1, 8, 5, 9, 4, 3, 23, 28, 15, 6, 13, 11, 25, 30, 51, 41, 47, 10, 17, 37, 42, 44, 50, 55, 19, 22, 29, 43, 45, 49, 63, 70, 72, 76, 85, 93, 7, 14, 20, 24, 26, 27, 31, 32, 33, 34, 35, 36, 38, 39, 40, 46, 48, 52, 53, 54, 56, 57, 58, 59, 61, 62, 64, 65, 66, 67, 69, 71, 73, 75, 77, 78, 79, 80, 81, 82, 83, 84, 86, 87, 88, 89, 90, 91, 92, 94, 95, 96, 97, 99, 100, 101, 102, 103, 104, 105, 106, 107, 108…	[2, 12, 16, 68, 21, 74, 18, 98, 60]	0.290166	0.277524	0.0126428	0.467548	0.0169963	0.154477	0.00794008	0.309331	0.0374165	262	370	568	1025	325	763	505	825	155	342	96	299	141	620	53	96	25	37	32	47	28	64	33	61	0	4	14	30	15
ATAD1	ENSG00000138138.13	chr10	-	87759787	87767672	3AS	TRUE	5.96477e-07	5.22928e-10	[10, 85, 79, 9, 67, 53, 115, 149, 213, 176, 55, 59, 60, 76, 88, 102, 114, 140, 141, 19, 155, 159, 58, 187, 189, 63, 190, 192, 68, 196, 71, 200, 201, 204, 206, 93, 103, 242]	[23, 44, 153, 28, 146, 21, 178, 18, 163, 164, 139, 165, 181, 195, 260, 148, 166, 43, 172, 174, 184, 257, 258, 15, 20, 150, 151, 157, 30, 158, 168, 41, 50, 186, 191, 194, 70, 199, 72, 203, 209, 210, 97, 226, 227, 232, 233, 234, 236, 238, 241, 244, 248, 253]	0.895706	0.824138	0.0715676	0.774569	0.00765872	0.112309	1.26166e-05	0.495521	0.103415	32	38	24	30	62	73	22	29	18	28	11	16	4	13	8	8	0	0	1	1	0	1	24	28	0	0	0	0	10
GGNBP2	ENSG00000278311.5	chr17	+	36586198	36587024	3AS	TRUE	8.79873e-07	7.82244e-10	[18, 15, 25, 26, 172, 203, 275, 217, 196, 225, 146, 311, 321, 213, 226, 353, 384, 269, 302, 305, 308, 314, 194, 195, 198, 199, 327, 328, 202, 204, 205, 329, 336, 209, 214, 221, 222, 362, 363, 112, 380]	[1, 0, 7, 23, 6, 33, 21, 51, 56, 58, 120, 81, 67, 63, 64, 57, 54, 236, 82, 157, 274, 34, 115, 289, 62, 84, 135, 80, 108, 12, 19, 27, 76, 87, 133, 24, 91, 104, 109, 134, 169, 234, 3, 11, 13, 29, 31, 95, 106, 152, 240, 252, 294, 17, 40, 42, 44, 71, 90, 93, 111, 127, 136, 142, 144, 155, 183, 188, 207, 219, 220, 233, 235, 237, 248, 259, 277, 280, 281, 295, 301, 303, 312, 330, 371, 9, 10, 20, 28, 30, …	0.176724	0.163128	0.0135956	0.884588	0.00494859	0.988761	3.86139e-05	0.934994	0.00588736	88	104	76	88	158	191	127	137	114	125	62	63	95	100	41	47	13	18	43	57	92	104	86	100	1	2	23	28	59
ZNF548	ENSG00000188785.12	chr19	+	57398429	57401667	ALJ	TRUE	9.07584e-07	8.18087e-10	[2, 3, 17, 15, 53, 35, 5, 36, 45, 7, 21, 24, 43, 50, 4, 6, 16, 20, 22, 23, 30, 32, 44, 48, 51, 54, 55, 58, 64, 66, 67, 69, 71, 75, 77, 79, 80, 81, 83]	[1, 0, 13, 9, 12, 27, 42, 37, 38, 46, 10, 19, 39, 65, 31, 41, 62, 74, 26, 28, 40, 52, 56, 11, 14, 18, 25, 29, 33, 34, 47, 49, 57, 59, 60, 61, 63, 68, 73, 76, 78, 82, 84]	0.102222	0.162362	0.0601394	0.542553	0.0552107	0.893458	0.000717159	0.702568	0.050954	9	35	48	58	83	108	29	45	57	80	37	39	38	41	5	6	7	7	1	15	14	24	15	35	0	0	1	4	7
MYL4	ENSG00000198336.9	chr17	+	47223495	47223676	ALJ	TRUE	9.61464e-07	8.84638e-10	[2, 0, 7, 15, 8, 21, 9, 3, 18, 30, 5, 19, 29, 34, 44, 1, 4, 6, 10, 14, 16, 17, 20, 23, 24, 25, 26, 27, 28, 31, 33, 35, 36, 43, 45, 46, 47, 48, 50, 51]	[13, 11, 37, 40, 12, 41, 38, 39, 42, 49, 22]	0.188073	0.194805	0.0067318	0.389678	6.89103e-05	0.0100212	4.29121e-07	0.220092	0.0381652	0	0	0	0	0	0	0	0	0	0	0	0	0	0	0	0	1	1	3	5	0	2	13	22	1	1	15	35	6
HLTF	ENSG00000071794.16	chr3	-	149041668	149042165	3AS	FALSE	9.61464e-07	8.90398e-10	[1, 4, 2, 0, 29, 76, 67, 18, 16, 159, 189, 37, 71, 82, 83, 12, 22, 58, 152, 185, 197, 202, 208, 212, 237, 272, 9, 21, 23, 35, 39, 42, 56, 57, 118, 125, 144, 146, 148, 154, 158, 162, 168, 169, 173, 180, 209, 215, 247, 308, 3, 15, 20, 24, 30, 33, 41, 50, 66, 69, 74, 75, 77, 78, 86, 88, 90, 95, 98, 99, 100, 102, 104, 106, 110, 111, 112, 114, 116, 117, 120, 122, 124, 127, 128, 129, 130, 132, 134, 138…	[5, 7, 13, 11, 68, 113, 14, 55, 221, 228, 219, 258, 139, 155, 298, 299, 46, 49, 204, 79, 81, 89, 225, 103, 233, 108, 250, 123, 133, 8, 135, 137, 275, 278, 28, 287, 291, 293, 295, 297, 300, 301, 48, 313, 61, 63, 65, 323, 70, 198, 73, 203, 211, 84, 91, 92, 93, 220, 223, 224, 226, 230, 234, 109, 236, 244, 119, 335]	0.0482115	0.0503751	0.00216363	0.358646	0.00485317	0.118188	0.00283013	0.246314	0.0216284	39	85	28	60	24	84	34	52	15	42	16	44	7	30	0	0	16	54	10	26	1	1	6	27	0	0	0	0	6
PGBD1	ENSG00000137338.5	chr6	+	28281918	28283775	3AS	TRUE	1.00468e-06	9.42823e-10	[1, 23, 58, 25, 8, 42, 43, 7, 13, 41, 53, 55, 74, 0, 3, 5, 20, 28, 31, 36, 38, 45, 46, 47, 50, 52, 57, 60, 62, 63, 65, 66, 68, 73, 76, 78, 80]	[2, 32, 9, 6, 59, 33, 44, 11, 18, 64, 67, 75, 81, 82, 12, 14, 15, 16, 17, 19, 21, 22, 27, 34, 35, 39, 40, 77, 83, 85, 87]	0.379747	0.326923	0.0528238	0.77545	0.0157049	0.218449	2.1389e-05	0.478671	0.0701919	0	0	6	7	0	0	3	10	1	1	0	0	1	4	0	0	1	1	3	3	0	0	2	3	0	0	0	0	1
SLC36A4	ENSG00000180773.15	chr11	-	93154216	93162705	3AS	TRUE	1.1852e-06	1.12687e-09	[6, 47, 90, 59, 110, 7, 51, 58, 100, 134, 52, 61, 62, 95, 128, 135, 136, 139, 45, 53, 54, 60, 91, 93, 102, 108, 115, 119, 122, 123, 124, 125]	[1, 4, 27, 10, 9, 18, 19, 20, 11, 89, 55, 78, 8, 16, 72, 63, 88, 0, 130, 132, 137, 24, 42, 65, 66, 67, 70, 74, 80, 83, 84, 85, 97, 98, 121, 144]	0.38172	0.29798	0.0837406	0.504897	0.0602274	0.953331	0.000931114	0.725257	0.0776262	5	18	6	13	8	23	1	11	11	15	15	15	8	10	5	8	2	4	0	13	10	12	20	58	1	3	0	9	7
TAF2	ENSG00000064313.12	chr8	-	119793451	119795531	ES	TRUE	1.45291e-06	1.39934e-09	[1, 3, 37, 27, 239, 2, 0, 45, 119, 150, 88, 6, 21, 266, 120, 162, 64, 160, 241, 4, 17, 73, 140, 156, 412, 147, 171, 7, 77, 293, 674, 46, 145, 447, 677, 26, 28, 29, 248, 252, 260, 298, 308, 323, 347, 395, 547, 50, 55, 62, 65, 113, 125, 209, 218, 297, 299, 316, 322, 325, 401, 546, 567, 635, 35, 52, 59, 75, 94, 118, 136, 149, 197, 229, 232, 246, 295, 296, 302, 304, 305, 317, 319, 330, 335, 336, 384,…	[34, 81, 554, 557, 348, 531, 586, 734, 303, 525, 72, 85, 602, 774, 8, 84, 90, 93, 111, 640, 191, 202, 806, 314, 342, 488, 515, 517, 518, 521, 523, 524, 13, 528, 534, 24, 539, 542, 38, 578, 579, 68, 581, 71, 74, 76, 78, 79, 591, 86, 91, 612, 101, 613, 103, 616, 105, 618, 107, 108, 109, 110, 621, 627, 116, 628, 137, 651, 143, 657, 660, 163, 164, 167, 176, 178, 180, 181, 697, 187, 188, 189, 192, 193…	0.996945	1	0.0030546	0.195352	0.0242104	0.0273091	4.0942e-07	0.104673	0.0137951	1	35	19	119	12	191	16	73	9	36	5	79	4	78	2	2	0	10	0	6	0	1	16	25	0	0	0	0	5
ZNF410	ENSG00000119725.20	chr14	+	73892107	73893796	IR	FALSE	1.73063e-06	1.68819e-09	[11, 73, 153, 287, 96, 216, 305, 108, 223, 260, 23, 92, 252, 263, 268, 362, 91, 116, 136, 149, 155, 174, 257, 271, 331, 410, 40, 44, 76, 79, 86, 107, 111, 119, 129, 130, 154, 156, 158, 160, 193, 201, 209, 212, 215, 220, 248, 259, 265, 275, 285, 288, 289, 297, 315, 317, 324, 333, 335, 337, 346, 356, 357, 363, 369, 379, 391, 396, 397, 398, 400, 401, 402, 413, 420, 429, 435]	[18, 57, 195, 300, 54, 196, 221, 109, 128, 389, 14, 15, 19, 26, 27, 415, 37, 39, 298, 299, 46, 431, 307, 308, 311, 439, 441, 187, 191, 192, 323, 327, 329, 336, 339, 342, 344, 351, 359, 110, 240, 368, 242, 370, 374, 378]	0.376068	0.179104	0.196964	0.575276	0.0452941	0.0571305	1.81978e-05	0.366191	0.0793231	9	10	4	6	5	18	2	3	7	19	2	4	0	3	7	8	4	7	5	8	4	9	9	25	0	0	8	9	5
BUB1B	ENSG00000156970.13	chr15	+	40200980	40202404	3AS	TRUE	1.81951e-06	1.79735e-09	[0, 3, 85, 31, 5, 9, 30, 15, 4, 11, 239, 16, 19, 74, 52, 251, 18, 77, 127, 10, 22, 25, 83, 126, 258, 279, 338, 44, 342, 39, 42, 90, 132, 137, 230, 234, 278, 345, 29, 50, 98, 117, 119, 124, 153, 165, 203, 263, 282, 311, 348, 367, 378, 8, 12, 13, 45, 46, 48, 49, 56, 60, 64, 72, 80, 81, 86, 104, 114, 116, 120, 166, 180, 213, 227, 229, 235, 242, 247, 250, 252, 253, 259, 261, 264, 267, 277, 284, 291, …	[23, 76, 135, 68, 309, 112, 162, 225, 106, 118, 28, 183, 187, 61, 70, 323, 337, 107, 109, 370, 376, 385, 388, 393, 399, 274, 147, 26, 283, 287, 289, 163, 294, 168, 170, 171, 305, 185, 191, 319, 67, 195, 71, 198, 199, 202, 335, 208, 210, 212, 218, 93, 221, 97, 99, 102, 359, 364, 110, 368, 369]	0.307379	0.213004	0.0943741	0.21153	0.00825831	0.0279144	0.000134536	0.119576	0.0131378	0	10	1	9	4	26	3	25	2	12	1	45	0	3	2	7	4	30	9	20	0	1	8	56	0	0	0	2	4
RDX	ENSG00000137710.17	chr11	-	110257913	110258105	3AS	TRUE	1.90203e-06	1.90236e-09	[0, 11, 10, 82, 1, 19, 46, 87, 13, 59, 52, 64, 25, 47, 81, 5, 8, 12, 15, 16, 36, 43, 44, 50, 54, 55, 61, 69, 84, 92, 100, 101, 110, 112, 2, 3, 7, 14, 17, 18, 26, 27, 28, 31, 32, 34, 37, 38, 39, 41, 45, 48, 49, 51, 53, 56, 58, 60, 62, 65, 76, 80, 83, 85, 86, 88, 90, 91, 93, 95, 96, 97, 102, 103, 104, 105, 106, 111, 116, 118, 119]	[24, 23, 107, 114, 22, 35, 66, 71, 78, 99, 109, 63, 67, 68, 72, 77, 79, 98, 108, 113, 120, 122]	0.133663	0.965517	0.831854	0.178033	0.0113929	0		0.0843041	0.0190734	2	6	4	18	2	13	5	13	0	5	5	9	0	8	0	0	2	5	1	10	0	2	9	31	0	0	0	0	1
ITFG1	ENSG00000129636.13	chr16	-	47313823	47365787	3AS	TRUE	2.0013e-06	2.02636e-09	[0, 8, 22, 35, 42, 11, 39, 4, 83, 44, 19, 65, 117, 172, 3, 29, 54, 69, 146, 56, 122, 188, 2, 32, 41, 43, 49, 70, 89, 93, 94, 121, 151, 156, 159, 170, 185, 5, 9, 10, 12, 13, 21, 27, 34, 40, 45, 46, 47, 55, 57, 60, 62, 64, 67, 71, 76, 78, 79, 80, 81, 82, 84, 86, 88, 90, 95, 96, 97, 98, 99, 100, 101, 103, 107, 119, 125, 127, 129, 130, 132, 133, 134, 135, 136, 137, 138, 141, 142, 152, 155, 160, 165, …	[28, 6, 58, 68, 114, 120, 18, 20, 53, 128, 162, 176, 75, 102, 140, 148, 158, 33, 164, 171, 177, 178, 180, 183, 194, 87, 108, 110, 111, 113, 118, 126]	0.106505	0.858108	0.751603	0.184501	0.0121585	0.0220532	5.95066e-05	0.0984233	0.0109433	12	32	13	31	22	92	16	44	13	48	5	103	5	56	4	20	0	5	1	8	3	19	4	8	0	0	1	1	5
USP15	ENSG00000135655.16	chr12	+	62389514	62389633	3AS	TRUE	2.19573e-06	2.25034e-09	[63, 169, 34, 56, 174, 539, 552, 497, 506, 133, 137, 152, 513, 530, 592, 850, 471, 521, 544, 569, 640, 646, 795, 829, 858, 893, 536, 540, 542, 545, 547, 550, 551, 561, 562, 600, 107, 1186, 826, 837, 889, 982, 474, 485, 999, 490, 1012, 504, 1028, 517, 1029, 522, 11, 525, 1040, 1041, 1042, 1044, 1022, 1049, 556, 1069, 1072, 568, 1080, 574, 1087, 581, 1094, 1095, 588, 78, 79, 80, 596, 599, 1113, 603…	[0, 1, 14, 31, 57, 135, 39, 5, 207, 115, 158, 163, 130, 82, 109, 134, 201, 23, 144, 266, 55, 61, 195, 147, 151, 38, 187, 175, 30, 4, 194, 432, 192, 275, 196, 205, 337, 715, 27, 58, 166, 181, 150, 98, 161, 173, 231, 361, 8, 90, 165, 349, 69, 103, 230, 279, 381, 433, 624, 749, 16, 40, 108, 113, 124, 142, 145, 171, 288, 391, 406, 473, 854, 1101, 32, 154, 215, 217, 263, 306, 375, 392, 445, 451, 483, …	0.993827	0.401935	0.591892	0.918595	0.00334038	0.993665	2.76447e-05	0.956914	0.00337499	96	112	108	135	161	200	74	94	141	162	93	97	112	125	36	40	61	63	26	26	60	65	179	219	0	0	18	18	154
COASY	ENSG00000068120.15	chr17	+	42562219	42562355	IR	FALSE	2.36633e-06	2.4544e-09	[7, 1, 60, 42, 71, 128, 98, 101, 70, 75, 77, 46, 141, 48, 51, 54, 56]	[0, 37, 2, 9, 8, 20, 33, 90, 76, 12, 21, 29, 41, 117, 64, 78, 10, 13, 39, 121, 4, 32, 120, 124, 137, 6, 14, 22, 25, 45, 50, 74, 116, 118, 130, 3, 11, 16, 18, 19, 23, 24, 28, 30, 49, 52, 57, 58, 62, 63, 66, 67, 68, 69, 72, 73, 80, 86, 89, 91, 92, 95, 97, 99, 100, 102, 103, 112, 113, 114, 115, 122, 123, 125, 126, 127, 132, 133, 135, 136, 138, 139, 146, 147, 148, 149, 150, 151]	0.0986842	0.250391	0.151707	0.68382	0.0112905	0.967765	1.61023e-06	0.837185	0.0230392	0	0	6	8	1	2	14	16	0	0	1	1	12	13	0	0	0	0	34	55	0	0	15	17	0	0	8	10	1
SNW1	ENSG00000100603.14	chr14	-	77737095	77738777	IR	TRUE	2.82615e-06	2.96623e-09	[12, 31, 114, 17, 118, 120, 147, 121, 130, 131, 128, 129, 134, 136, 138, 140, 141, 15, 143, 144, 145, 150, 156, 30, 159, 160, 162, 37, 185, 189, 193, 200, 201, 203, 211, 214, 215, 218, 116]	[1, 6, 23, 9, 36, 124, 126, 20, 38, 54, 102, 115, 179, 53, 71, 72, 73, 205, 79, 80, 105, 106, 108, 112, 119]	1	1	0	0.181226	0.051149	0.933905	0.00218176	0.461505	0.155466	1	5	19	34	17	40	3	30	0	39	1	5	14	18	0	6	0	0	0	7	1	5	0	19	0	0	0	1	0
TOR1AIP2	ENSG00000169905.13	chr1	-	179865854	179877238	3AS	TRUE	2.86879e-06	3.04641e-09	[8, 2, 5, 39, 65, 109, 1, 46, 70, 95, 34, 48, 67, 88, 91, 111, 10, 24, 28, 33, 38, 40, 43, 45, 49, 51, 52, 54, 56, 62, 63, 64, 72, 77, 80, 82, 96, 102, 116, 118, 119]	[26, 18, 20, 115, 94, 59, 127, 89, 27, 31, 61, 57]	0.31015	1	0.68985	0.295889	0.0172448	0		0.152255	0.0423947	1	1	1	11	0	11	3	6	3	5	0	4	0	5	1	3	0	0	1	5	0	1	7	10	0	0	1	7	2
SUN1	ENSG00000164828.18	chr7	+	849603	849831	IR	TRUE	3.05214e-06	3.2788e-09	[133, 222, 83, 122, 391, 75, 722, 191, 644, 691, 699, 768, 705, 589, 344, 131, 259, 260, 155, 425, 703, 759, 112, 246, 255, 773, 147, 152, 796, 798, 167, 42, 689, 817, 695, 185, 825, 706, 712, 715, 718, 724, 726, 345, 474, 729, 730, 350, 481, 737, 232, 236, 760, 114, 242, 756, 119, 248, 123, 765]	[34, 54, 12, 87, 0, 279, 316, 325, 101, 111, 382, 46, 31, 19, 44, 168, 170, 92, 352, 360, 179, 245, 132, 163, 265, 332, 337, 387, 392, 269, 388, 446, 473, 533, 48, 570, 571, 178, 738, 233, 763, 508, 51, 582, 627, 630, 127, 645, 670, 184, 190, 211, 735, 228, 742, 256, 771, 780, 353, 375, 380, 424, 444, 458, 478, 490, 505, 513, 518, 524, 20, 22, 548, 37, 550, 562, 52, 573, 579, 583, 76, 77, 81, 600…	0.996865	0.932508	0.0643568	0.533037	0.0177916	0.932949	0.000158665	0.784775	0.0377997	0	0	29	112	20	38	54	142	1	2	0	0	32	47	0	0	0	0	0	0	0	0	0	0	0	0	0	0	0
GEN1	ENSG00000178295.15	chr2	+	17754345	17759928	3AS	FALSE	3.36345e-06	3.69221e-09	[5, 57, 10, 12, 6, 8, 9, 136, 13, 17, 18, 21, 55, 56, 59, 74, 75, 91, 122, 166, 167, 169]	[29, 70, 52, 34, 41, 79, 92, 32, 154, 27, 38, 31, 50, 90, 93, 108, 140, 141, 28, 156, 30, 33, 35, 36, 158, 40, 161, 162, 49, 51, 71, 72, 73, 76, 77, 78, 80, 94, 95, 121, 170]	0.169492	0.211073	0.0415811	0.94184	0.000541333	0.0981719	0.0153737	0.540263	0.17933	1	1	0	0	5	5	1	1	4	4	0	1	0	0	0	0	3	3	2	2	0	0	3	3	0	0	0	0	0
FCRL1	ENSG00000163534.15	chr1	-	157801577	157801914	3AS	FALSE	3.36345e-06	3.69628e-09	[8, 45, 32, 62, 4, 77, 21, 65, 30, 44, 53, 134, 106, 36, 247, 221, 174, 158, 78, 72, 160, 60, 75, 93, 1, 283, 35, 46, 286, 120, 171, 188, 63, 108, 118, 50, 317, 111, 99, 112, 141, 179, 409, 420, 165, 5, 242, 604, 116, 161, 438, 27, 40, 103, 391, 61, 169, 294, 453, 529, 543, 17, 129, 288, 302, 309, 342, 119, 223, 226, 236, 271, 703, 997, 83, 205, 224, 265, 266, 600, 81, 101, 126, 139, 339, 548, 84…	[43, 262, 334, 381, 207, 524, 246, 373, 677, 232, 313, 756, 277, 227, 530, 537, 732, 552, 230, 275, 419, 38, 1136, 412, 130, 1225, 735, 256, 273, 276, 407, 98, 616, 1190, 701, 1240, 1256, 268, 360, 408, 444, 450, 456, 998, 1031, 523, 1082, 1092, 1098, 1107, 610, 1182, 1189, 681, 1229, 1234, 214, 731, 225, 1251, 1255, 1261, 1274, 264, 1287, 799, 1336, 323, 872, 406, 413, 1037, 527, 1039, 1049, 541…	0.346012	0.997455	0.651443	0.359078	0.0285836	0.0605058	0.00027569	0.192741	0.0260621	19	39	105	161	113	295	81	205	23	81	5	72	27	126	14	24	0	0	0	0	1	10	0	0	0	0	0	0	0
TPT1	ENSG00000133112.17	chr13	-	45337403	45338659	3AS	TRUE	3.80517e-06	4.2287e-09	[26, 227, 72, 235, 286, 256, 130, 229, 236, 210, 213, 121, 223]	[7, 197, 128, 126]	0.0361991	0.0153846	0.0208145	0.128745	3.86851e-05	0.762721	0.0381545	0.397224	0.0910644	0	6	1	3	1	2	2	7	0	7	0	0	1	3	2	10	0	9	2	17	3	20	4	29	0	1	5	32	1
DNAJC3	ENSG00000102580.15	chr13	+	95725252	95757643	3AS	TRUE	4.0332e-06	4.53191e-09	[0, 7, 8, 25, 36, 72, 15, 42, 44, 47, 48, 53, 89, 2, 12, 17, 23, 24, 26, 29, 34, 37, 39, 41, 43, 46, 49, 55, 59, 75, 76]	[6, 31, 66, 86, 13, 56, 57, 60, 61, 63, 70, 74, 77, 79, 82, 83, 85, 87, 88]	0.117381	1	0.882619	0.241268	0.0141248	0		0.109891	0.0263632	0	0	1	6	0	4	1	10	1	3	0	2	0	3	0	1	0	1	8	27	4	13	9	25	0	0	4	5	3
FAM122B	ENSG00000156504.16	chrX	-	134796256	134797120	3AS	TRUE	4.47372e-06	5.08215e-09	[82, 52, 77, 115, 79, 224, 112, 121, 76, 125, 103, 234, 117, 296, 107, 275, 278, 164, 300, 303, 304, 81]	[106, 19, 80, 25, 168, 18, 6, 4, 110, 29, 141, 33, 64, 7, 120, 101, 66, 142, 28, 177, 249, 94, 130, 144, 291, 171, 187, 195, 272, 146, 273, 274, 151, 282, 156, 286, 160, 289, 165, 297, 170, 298, 49, 305, 183, 57, 190, 201, 212, 213, 222, 96, 230, 235, 246, 252, 254, 308]	0.0140845	0.0170455	0.00296095	0.749718	0.025936	0.991146	2.7158e-07	0.866329	0.0305989	40	56	48	54	57	66	25	34	39	47	39	39	38	42	23	24	6	7	11	13	6	6	15	26	0	0	1	1	11
DDHD2	ENSG00000085788.14	chr8	+	38237627	38238106	3AS	TRUE	5.47994e-06	6.29287e-09	[4, 245, 155, 54, 121, 214, 258, 203, 159, 192, 398, 93, 143, 412, 73, 164, 267, 402, 512, 154, 168, 195, 197, 219, 404, 448, 461, 530, 552, 554, 59, 60, 68, 80, 81, 96, 107, 112, 114, 157, 161, 162, 163, 169, 180, 181, 186, 189, 191, 193, 210, 211, 217, 228, 275, 329, 367, 378, 389, 403, 406, 410, 414, 416, 421, 424, 425, 427, 437, 443, 444, 450, 455, 456, 502, 507, 508]	[0, 6, 40, 43, 5, 1, 61, 19, 9, 223, 14, 144, 10, 58, 52, 28, 171, 8, 48, 124, 46, 99, 251, 135, 220, 17, 72, 246, 78, 248, 269, 23, 56, 299, 521, 20, 22, 76, 97, 242, 499, 21, 36, 42, 87, 91, 100, 105, 225, 229, 252, 261, 439, 560, 567, 64, 79, 86, 116, 139, 145, 254, 260, 262, 265, 271, 283, 298, 318, 435, 511, 520, 2, 15, 38, 119, 150, 274, 285, 335, 359, 363, 373, 438, 451, 497, 516, 557, 572…	0.0806452	0.108874	0.0282293	0.811892	0.0153563	0.969384	8.87222e-05	0.885158	0.012816	59	84	177	229	163	201	223	327	35	46	79	82	105	108	22	26	2	5	13	25	17	18	42	50	0	0	11	13	15
YWHAB	ENSG00000166913.13	chr20	+	44901833	44903035	3AS	FALSE	5.51047e-06	6.46401e-09	[33, 38, 70, 73, 44, 43, 156, 234, 237, 39, 359, 294, 83, 348, 221, 257, 49, 226, 230, 262, 55, 187, 365, 259, 148, 176, 316, 327, 346, 225, 357, 360, 361, 370, 371, 246, 251]	[1, 97, 105, 107, 59, 103, 111, 114, 161, 98, 130, 122, 126, 155, 308, 185, 369, 258, 131, 261, 266, 142, 151, 157, 172, 182, 188, 203, 91, 93, 222, 249]	0.938983	1	0.0610169	0.180248	0.0248646	0.704019	0.0256747	0.397134	0.0888972	3	50	6	91	9	69	19	114	10	77	20	55	17	30	2	16	3	16	5	46	9	24	3	40	0	0	0	9	2
SEPTIN2	ENSG00000168385.18	chr2	+	241335212	241335974	3AS	FALSE	5.51047e-06	6.41689e-09	[11, 10, 2, 25, 56, 250, 34, 15, 245, 16, 69, 174, 13, 33, 19, 113, 149, 88, 62, 303, 8, 5, 38, 135, 294, 186, 28, 131, 31, 145, 170, 172, 315, 203, 21, 71, 63, 384, 0, 171, 196, 348, 59, 102, 77, 104, 125, 264, 611, 29, 49, 108, 163, 302, 323, 358, 429, 87, 273, 478, 9, 78, 134, 391, 46, 191, 328, 6, 20, 76, 332, 92, 150, 183, 277, 427, 435, 89, 147, 290, 300, 306, 336, 376, 507, 591, 60, 82, 24…	[14, 97, 85, 212, 252, 23, 268, 249, 322, 408, 224, 95, 144, 661, 214, 263, 35, 91, 3, 812, 1059, 52, 124, 173, 882, 401, 308, 381, 423, 431, 94, 185, 1034, 1039, 1046, 1049, 1070, 572, 111, 1177, 688, 213, 228, 809, 825, 852, 351, 354, 876, 399, 455, 459, 1047, 1048, 556, 1077, 1078, 1079, 576, 1089, 579, 600, 1116, 1130, 1135, 119, 120, 126, 1173, 207, 209, 222, 747, 749, 242, 754, 756, 771, 27…	0.225734	0.997833	0.772099	0.133466	0.00885558	0.0312526	0.000196153	0.0808464	0.00524077	89	457	33	706	47	1177	37	426	102	525	17	930	10	510	6	178	8	112	20	38	10	122	28	135	2	2	2	7	15
EI24	ENSG00000149547.15	chr11	+	125572569	125575262	3AS	FALSE	5.76195e-06	6.83015e-09	[2, 4, 18, 61, 27, 24, 5, 8, 3, 47, 16, 70, 0, 46, 50, 64, 19, 58, 71, 72, 12, 23, 62, 73, 9, 74, 87, 7, 28, 51, 63, 66, 68, 77, 79, 80, 81, 86, 105, 10, 11, 13, 17, 26, 29, 30, 31, 32, 37, 40, 42, 44, 48, 49, 53, 55, 57, 65, 67, 69, 76, 78, 82, 83, 84, 85, 88, 93, 94, 95, 97, 98, 99, 100, 101, 102, 103, 106, 107, 108, 109, 110, 111, 112, 115, 116, 117, 120, 121, 122, 123, 124, 125, 126, 129, 132…	[6, 14, 43, 89, 25, 21, 33, 35, 128, 130, 38, 39, 41, 45, 54, 56, 92, 96, 114, 119, 133]	0.095657	0.272059	0.176402	0.118983	0.00058487	0.0201369	2.54977e-06	0.0611029	0.00273427	2	14	3	28	3	28	2	34	3	21	0	25	0	14	5	26	0	2	1	15	1	19	2	21	0	0	2	20	2
CNTRL	ENSG00000119397.17	chr9	+	121171548	121173356	3AS	TRUE	6.28308e-06	7.52549e-09	[36, 48, 623, 787, 968, 729, 730, 748, 899, 775, 649, 911, 788, 932, 436, 721, 741, 358, 746, 768, 644, 138, 140, 141, 527, 655, 783, 531, 669, 544, 672, 801, 35, 677, 803, 804, 806, 42, 811, 433, 50, 51, 309, 689, 945, 948, 441, 58, 952, 61, 832, 322, 706, 68, 837, 582, 838, 964, 973, 206, 720, 849, 734, 230, 874, 620, 750, 875, 753, 879, 638]	[4, 99, 46, 45, 114, 402, 29, 37, 30, 22, 60, 150, 162, 295, 567, 62, 121, 163, 180, 229, 174, 269, 281, 420, 428, 431, 442, 635, 651, 712, 887, 10, 26, 57, 160, 169, 181, 252, 256, 266, 268, 271, 296, 308, 331, 418, 437, 453, 517, 562, 636, 743, 759, 38, 161, 171, 178, 202, 204, 217, 223, 248, 260, 320, 332, 361, 406, 413, 434, 444, 451, 482, 549, 564, 586, 595, 600, 612, 624, 652, 692, 714, 735…	0.419118	0.492657	0.0735392	0.656817	0.0288531	0.958138	1.31436e-05	0.82055	0.0335394	20	21	34	43	37	65	40	60	8	13	11	15	24	28	2	3	0	3	0	0	0	0	1	3	0	0	0	0	0
UBXN2A	ENSG00000173960.14	chr2	+	23999654	24000821	ALJ	TRUE	7.37072e-06	8.9192e-09	[3, 1, 20, 51, 0, 63, 40, 42, 53, 47, 22, 13, 30, 17, 21, 50, 82, 111, 5, 31, 49, 59, 75, 104, 118, 9, 55, 65, 71, 73, 79, 80, 96, 98, 100, 101, 116, 2, 4, 6, 8, 10, 11, 12, 15, 16, 18, 23, 24, 25, 26, 27, 29, 32, 33, 35, 38, 39, 41, 43, 44, 45, 46, 48, 52, 54, 56, 57, 60, 61, 62, 64, 66, 67, 68, 69, 70, 72, 76, 77, 78, 81, 83, 84, 87, 88, 90, 92, 93, 95, 97, 99, 102, 103, 105, 106, 107, 109, 110…	[19, 74, 14, 114, 89, 128, 129, 123, 113, 85, 86, 117, 91, 28, 94, 127]	0.418728	0.285714	0.133014	0.142308	0.00347947	0		0.0680022	0.00887838	1	9	1	8	0	11	3	18	6	29	0	29	0	14	2	9	1	3	1	16	2	12	5	22	0	1	0	3	2
GGNBP2	ENSG00000275099.2	KI270857.1	+	821693	822519	3AS	TRUE	7.47587e-06	9.13876e-09	[29, 5, 24, 87, 32, 166, 91, 127, 296, 181, 194, 207, 217, 260, 269, 271, 274, 288, 164, 165, 294, 168, 295, 297, 301, 176, 177, 178, 179, 180, 310, 185, 191, 64, 320, 324, 197, 75, 203, 220]	[0, 1, 6, 15, 8, 11, 2, 34, 51, 14, 62, 74, 54, 52, 42, 12, 225, 56, 13, 79, 63, 190, 226, 27, 70, 9, 44, 80, 100, 228, 232, 106, 134, 137, 154, 209, 210, 231, 259, 50, 72, 76, 86, 88, 89, 110, 147, 159, 163, 173, 184, 237, 242, 256, 280, 21, 22, 25, 46, 48, 71, 82, 108, 119, 130, 131, 135, 160, 170, 171, 183, 193, 213, 227, 230, 239, 246, 250, 252, 272, 281, 291, 314, 16, 19, 28, 35, 36, 40, 45,…	0.15678	0.158526	0.00174647	0.889876	0.00279323	0.981645	0.000150365	0.933362	0.00383945	78	100	77	84	162	199	123	138	88	102	72	73	92	99	45	49	24	27	36	46	64	69	105	111	2	2	14	17	60
VPS8	ENSG00000156931.16	chr3	+	184869528	184870715	3AS	TRUE	7.52578e-06	9.29516e-09	[1, 13, 6, 49, 147, 16, 19, 27, 57, 254, 185, 240, 5, 153, 18, 29, 34, 390, 2, 20, 24, 40, 112, 150, 156, 172, 173, 187, 189, 217, 25, 39, 50, 69, 111, 128, 129, 130, 134, 220, 227, 271, 298, 338, 358, 360, 7, 8, 14, 55, 63, 74, 78, 81, 133, 154, 161, 174, 175, 181, 186, 191, 194, 204, 218, 230, 231, 232, 263, 275, 276, 277, 291, 305, 317, 319, 330, 336, 347, 351, 373, 408, 3, 10, 12, 17, 22, 28,…	[53, 11, 334, 348, 59, 340, 90, 353, 357, 66, 344, 350, 96, 226, 113, 400, 146, 21, 409, 410, 30, 418, 36, 304, 306, 308, 182, 309, 56, 312, 314, 315, 316, 323, 324, 325, 70, 71, 326, 327, 94, 103, 362, 368, 115, 125]	0.326778	0.905882	0.579105	0.14345	0.00445736	0.00813089	3.44061e-07	0.0681313	0.00755787	4	16	18	82	7	79	22	80	1	8	1	14	2	31	0	0	0	1	0	0	1	6	0	0	0	0	0	0	0
LIN9	ENSG00000183814.15	chr1	-	226297813	226301172	3AS	TRUE	7.52578e-06	9.47696e-09	[1, 9, 8, 30, 10, 124, 23, 115, 4, 76, 134, 7, 24, 89, 40, 70, 109, 15, 189, 194, 21, 28, 37, 52, 66, 79, 102, 117, 132, 136, 137, 148, 164, 172, 246, 0, 13, 16, 22, 31, 32, 38, 47, 62, 81, 84, 90, 100, 119, 127, 135, 139, 156, 166, 167, 168, 175, 178, 179, 180, 187, 210, 216, 232, 244, 259, 5, 12, 14, 17, 19, 20, 26, 35, 36, 45, 50, 51, 53, 56, 57, 58, 64, 69, 72, 73, 74, 75, 80, 82, 83, 85, 86,…	[42, 43, 161, 41, 176, 183, 243, 261, 264, 265, 171, 49, 65, 78, 219, 220, 93, 99, 230, 108, 238, 240, 241, 248]	0.086671	0.0722892	0.0143819	0.0871504	0.00452734	0		0.0436731	0.00549172	2	30	0	56	4	37	3	33	5	35	0	45	0	37	0	2	1	22	0	17	1	4	0	24	2	22	0	3	1
S100A8	ENSG00000143546.10	chr1	-	153390557	153391040	3AS	TRUE	7.52578e-06	9.47854e-09	[0, 10, 6, 16, 49, 19, 31, 21, 28, 32, 34, 38, 42, 43, 44, 46, 48, 54, 55, 59, 61, 65]	[1, 4, 12, 15, 13, 11, 35, 24, 18, 30, 29, 36, 50, 25, 37, 39, 40, 45, 53, 64]	0	0.0159096	0.0159096	0.122732	0.000229685	0.0567389	0.000174021	0.0939017	0.00134983	0	0	0	0	0	0	0	0	0	0	0	0	0	0	0	0	134	1210	74	529	96	815	81	534	1472	10046	319	2547	469
ELP2	ENSG00000134759.14	chr18	+	36145034	36145933	IR	TRUE	7.56461e-06	9.62086e-09	[25, 445, 37, 65, 97, 520, 93, 123, 222, 480, 516, 46, 53, 575, 86, 91, 110, 669, 479, 573, 89, 379, 470, 488, 492, 504, 506, 511, 512, 518, 523, 525, 531, 533, 535, 536, 539, 540, 543, 546, 35, 39, 41, 42, 554, 556, 45, 567, 569, 58, 63, 576, 577, 580, 583, 585, 88, 92, 96, 101, 104, 619, 651, 652, 655, 657, 664, 169, 698, 189, 701, 705, 707, 708, 710, 225, 257, 336, 345, 346, 351, 375, 411, 413…	[124, 134, 166, 219, 221, 294, 417, 120, 217, 232, 243, 293, 308, 327, 502, 145, 223, 298, 337, 339, 347, 378, 415, 428, 484, 537, 549, 553, 568, 570, 590, 84, 112, 115, 119, 643, 149, 662, 152, 167, 173, 688, 195, 201, 215, 246, 251, 253, 254, 265, 266, 273, 280, 285, 291, 309, 310, 311, 313, 314, 318, 322, 326, 330, 338, 343, 348, 356, 357, 371, 386, 388, 391, 395, 407, 425, 432, 455, 460, 477,…	1	1	0	0.158565	0.0173728	0.83911	0.00313644	0.432603	0.121225	3	14	6	25	10	42	3	21	5	26	8	13	4	17	0	14	0	0	0	0	0	1	0	3	0	0	0	0	1
SNHG29	ENSG00000175061.18	chr17	+	16441130	16441356	IR	FALSE	8.01648e-06	1.03531e-08	[28, 47, 111, 26, 112, 114, 9, 41, 150, 160, 145]	[0, 1, 21, 10, 5, 14, 15, 44, 86, 34, 80, 32, 88, 35, 87, 135, 36, 27, 167, 51, 58, 76, 99, 110, 120]	0.977143	0.993534	0.0163916	0.593799	0.0586097	0.991374	7.24311e-07	0.790738	0.0680583	9	15	20	24	7	7	4	7	14	24	0	0	26	26	3	3	0	5	9	22	5	7	3	9	0	0	1	10	28
ZC3H11A	ENSG00000058673.17	chr1	+	203795775	203802568	3AS	TRUE	8.01648e-06	1.03935e-08	[103, 667, 704, 748]	[0, 23, 25, 129, 219, 97, 248, 183, 216, 292, 189, 264, 523, 591, 215, 651, 320, 75, 213, 250, 136, 142, 654, 538, 289, 423, 170, 556, 430, 50, 180, 566, 184, 449, 331, 460, 478, 225, 504, 366, 239, 249, 253]	1	1	0	0.426307	0.11476	0.986864	8.16159e-05	0.701007	0.126842	7	7	12	17	13	20	5	18	0	4	1	3	5	6	0	0	0	0	0	2	0	1	0	1	0	0	0	1	0
BRD9	ENSG00000028310.18	chr5	-	865581	870472	ES	FALSE	8.63229e-06	1.12985e-08	[2, 5, 11, 38, 34, 30, 148, 182, 199, 195, 41, 192, 198, 137, 202, 26, 275, 357, 76, 152, 218, 247, 280, 361, 374, 395, 32, 51, 62, 73, 82, 128, 135, 185, 193, 227, 229, 235, 252, 310, 10, 15, 22, 23, 74, 111, 149, 181, 207, 209, 211, 215, 225, 241, 244, 246, 248, 256, 263, 264, 265, 272, 277, 290, 316, 323, 328, 338, 363, 369, 417, 0, 1, 6, 7, 12, 13, 17, 21, 25, 31, 35, 36, 39, 40, 42, 43, 44, …	[54, 113, 57, 159, 289, 230, 66, 18, 58, 126, 212, 306, 86, 80, 382, 24, 33, 59, 77, 118, 238, 399, 71, 87, 169, 190, 219, 231, 239, 258, 304, 311, 314, 322, 324, 336, 340, 400, 434, 3, 9, 16, 19, 20, 28, 37, 47, 48, 50, 53, 55, 56, 60, 61, 63, 64, 65, 68, 69, 70, 81, 83, 84, 85, 100, 101, 103, 104, 105, 107, 108, 109, 110, 112, 114, 115, 117, 120, 121, 124, 125, 127, 129, 136, 141, 143, 150, 154…	0.257267	1	0.742733	0.364454	0.0241386	0.0737933	0.0016713	0.221473	0.0350874	12	25	25	51	26	83	31	67	8	25	5	34	17	120	11	39	2	5	0	13	4	14	12	19	0	0	2	4	1
DPH5	ENSG00000117543.21	chr1	-	100992740	100995109	3AS	TRUE	9.20148e-06	1.21571e-08	[0, 5, 38, 2, 42, 49, 75, 39, 80, 8, 67, 37, 91, 16, 18, 63, 94, 137, 158, 59, 71, 102, 40, 53, 55, 60, 87, 92, 112, 120, 179, 15, 41, 56, 62, 68, 72, 79, 83, 84, 85, 88, 89, 93, 104, 111, 123, 126, 133, 146, 175, 190, 3, 7, 14, 17, 33, 46, 61, 66, 69, 73, 77, 78, 81, 82, 90, 96, 99, 100, 105, 107, 108, 109, 110, 116, 117, 127, 136, 140, 141, 144, 153, 154, 162, 163, 165, 167, 169, 170, 171, 173,…	[23, 26, 35, 129, 6, 135, 20, 121, 128, 132, 21, 27, 50, 51, 124, 139, 142, 145, 148, 24, 149, 156, 28, 150, 157, 159, 160, 161, 164, 44, 47, 54, 195, 199, 200, 202, 204, 205, 122]	0.357496	0.831169	0.473673	0.277691	0.0335612	0.00710653	1.57308e-07	0.127074	0.0388164	6	12	2	16	10	24	7	27	9	23	5	31	0	17	0	9	1	2	1	5	0	10	2	4	0	1	0	0	1
ZNF107	ENSG00000196247.11	chr7	+	64697367	64699283	ALJ	TRUE	9.71571e-06	1.29565e-08	[6, 24, 3, 34, 0, 12, 1, 35, 8, 27, 30, 22, 19, 33, 38, 26, 51, 67, 9, 123, 45, 5, 91, 103, 13, 97, 59, 82, 134, 201, 78, 40, 71, 90, 186, 7, 37, 56, 98, 183, 185, 236, 48, 55, 119, 120, 232, 258, 311, 14, 29, 54, 62, 74, 92, 105, 111, 118, 122, 132, 133, 138, 152, 154, 170, 172, 180, 233, 242, 245, 252, 304, 307, 316, 4, 31, 32, 36, 42, 44, 53, 57, 83, 101, 108, 114, 124, 136, 150, 164, 167, 174…	[10, 16, 23, 88, 182, 95, 96, 225, 196, 70, 231, 63, 205, 127, 130, 263, 272, 274, 20, 21, 283, 296, 310, 317, 190, 191, 318, 208, 211, 247, 250]	0.403771	0.32459	0.0791808	0.200822	0.0173768	0.0180099	0.000226029	0.115572	0.0172527	30	288	26	396	34	419	31	203	47	180	10	183	16	132	4	22	4	9	10	52	2	7	9	24	0	0	0	7	5
SLC33A1	ENSG00000169359.16	chr3	-	155828377	155829687	3AS	TRUE	9.84998e-06	1.32572e-08	[4, 20, 9, 14, 57, 62, 2, 30, 6, 24, 5, 12, 15, 35, 27, 71, 136, 114, 58, 67, 83, 93, 110, 17, 18, 86, 130, 13, 44, 74, 88, 125, 7, 23, 33, 36, 54, 72, 73, 76, 98, 99, 109, 116, 120, 124, 127, 1, 3, 19, 37, 38, 47, 50, 51, 52, 60, 61, 63, 68, 69, 79, 94, 96, 103, 111, 119, 123, 128, 129, 137, 138, 139, 140, 141, 143, 146, 148, 149, 150, 151, 152, 154, 158, 161, 162, 164, 166, 170, 171, 178, 179, …	[26, 56, 16, 101, 29, 117, 131, 31, 172, 113, 168, 49, 115, 132, 142, 144, 145, 169, 182, 184, 59, 92, 118, 121]	0.311359	0.390071	0.0787123	0.0989724	0.002327	0.0110889	2.01096e-07	0.0546425	0.00314121	4	39	22	134	11	134	18	114	2	68	6	89	0	79	2	17	1	18	8	32	1	6	4	19	0	0	0	3	0
ZC3H11A	ENSG00000058673.17	chr1	+	203801628	203802568	IR	TRUE	1.10641e-05	1.50279e-08	[20, 13, 58, 90, 101, 86, 117, 91, 160, 69, 88, 78, 233, 153, 35, 112, 130, 163, 169, 95, 55, 120, 123, 137, 374, 32, 208, 577, 109, 111, 118, 185, 199, 245, 277, 549, 45, 581, 116, 124, 152, 155, 168, 737, 228, 241, 252, 254, 255, 263, 275, 318, 525, 546, 71, 583, 585, 586, 83, 600, 618, 119, 121, 628, 125, 126, 645, 646, 138, 151, 158, 159, 162, 675, 166, 686, 693, 699, 708, 714, 719, 720, 722,…	[7, 4, 0, 23, 59, 46, 72, 202, 99, 25, 53, 57, 115, 527, 129, 219, 2, 42, 314, 482, 97, 248, 259, 563, 183, 216, 267, 17, 93, 105, 189, 203, 205, 292, 304, 523, 526, 51, 114, 148, 215, 425, 438, 452, 454, 75, 649, 651, 146, 250, 320, 367, 369, 392, 420, 446, 448, 450, 512, 516, 519, 12, 524, 532, 538, 540, 551, 552, 556, 50, 566, 569, 66, 87, 603, 613, 110, 642, 136, 648, 142, 663, 170, 180, 184,…	0.99945	0.51169	0.487761	0.246257	0.0236798	0.726271	0.0299995	0.466487	0.080152	38	115	104	226	90	145	28	133	5	32	19	38	39	73	0	7	6	22	2	11	1	9	1	48	0	0	0	1	1
LRRCC1	ENSG00000133739.16	chr8	+	85107399	85109594	3AS	TRUE	1.12697e-05	1.54464e-08	[0, 12, 15, 2, 66, 71, 35, 18, 170, 21, 48, 52, 101, 130, 143, 150, 173, 306, 28, 39, 64, 65, 68, 94, 97, 99, 146, 154, 167, 181, 187, 194, 228, 236, 265, 268, 281, 286, 287, 6, 13, 24, 26, 33, 42, 45, 53, 67, 72, 76, 77, 82, 83, 87, 93, 105, 112, 116, 119, 133, 139, 140, 147, 151, 152, 155, 157, 160, 166, 172, 184, 185, 188, 191, 193, 197, 199, 202, 206, 223, 229, 248, 249, 256, 257, 263, 271, 2…	[11, 70, 100, 79, 20, 264, 225, 103, 135, 270, 272, 276, 279, 280, 284, 285, 301, 302, 50, 107, 108, 235, 251]	0.129447	1	0.870553	0.221279	0.00484717	0.0182735	3.53168e-06	0.113628	0.0141847	9	21	4	17	2	17	2	19	0	6	0	12	1	11	0	1	3	17	7	16	0	5	1	2	0	0	0	0	5
ATP5F1B	ENSG00000110955.9	chr12	-	56639196	56639979	IR	TRUE	1.16825e-05	1.61711e-08	[38, 220, 225, 41, 330, 236, 291, 308]	[11, 16, 9, 20, 13, 42, 19, 5, 36, 67, 80, 46, 63, 68, 49, 143, 185, 69, 111, 21, 65, 78, 170, 64, 195, 87, 139, 18, 155, 165, 309, 182, 207, 86, 88, 217, 257, 260, 147, 156, 28, 29, 288, 34, 45, 175, 305, 55, 316, 66, 204, 77, 214, 215, 97, 110, 238, 245, 123]	0.208333	0.995798	0.787465	0.758056	0.0341307	1		0.86733	0.0386766	5	7	46	48	9	13	21	34	6	6	2	2	64	65	0	1	0	0	2	3	2	4	23	24	0	0	3	3	3
ZC3H11A	ENSG00000058673.17	chr1	+	203801628	203802651	3AS	TRUE	1.16825e-05	1.63848e-08	[140, 56, 172, 175, 211, 177, 284, 344, 179, 197, 84, 473, 474, 224, 490, 365, 500, 378, 815, 816]	[20, 13, 58, 90, 101, 86, 117, 91, 160, 69, 88, 195, 78, 233, 153, 35, 112, 130, 163, 169, 95, 55, 120, 123, 137, 374, 32, 208, 577, 591, 104, 109, 111, 118, 185, 199, 245, 264, 277, 549, 45, 581, 116, 124, 152, 155, 168, 213, 737, 228, 241, 252, 254, 255, 263, 275, 318, 501, 525, 546, 550, 71, 583, 585, 586, 83, 600, 604, 618, 119, 121, 628, 125, 126, 645, 646, 138, 654, 151, 154, 158, 159, 162,…	0.8	1	0.2	0.955647	0.0020683	0.717229	0.00476028	0.858729	0.0203877	78	78	123	132	57	62	108	108	27	28	20	23	34	38	7	10	16	16	9	9	8	8	47	50	0	0	1	1	5
NET1	ENSG00000173848.19	chr10	+	5455118	5456064	IR	TRUE	1.16825e-05	1.64449e-08	[84, 67, 104, 121, 225, 227, 228, 108, 280, 233, 75, 232, 113, 71, 243, 142, 292, 167, 68, 90, 91, 103, 115, 255, 257, 132, 136, 265, 139, 141, 271, 146, 274, 148, 278, 23, 283, 166, 39, 296, 299, 83, 88, 105, 248, 124]	[25, 40, 16, 52, 10, 212, 93, 160, 174, 5, 133, 264, 266, 140, 149, 165, 294, 168, 169, 51, 61, 65, 219, 96, 97, 98, 99, 102, 114, 301]	0.0580448	0.646341	0.588297	0.0540939	2.67882e-06	0.859694	0.0191396	0.313746	0.124026	0	0	0	0	2	2	0	5	0	0	0	0	0	0	0	0	0	1	0	26	0	3	5	103	0	0	0	13	0
OAS1	ENSG00000089127.14	chr12	+	112908824	112911050	3AS	TRUE	1.25033e-05	1.77547e-08	[1, 4, 6, 0, 34, 18, 31, 43, 26, 59, 54, 60, 69, 74, 136, 142, 37, 58, 107, 122, 137, 138, 16, 22, 24, 161, 45, 51, 67, 75, 76, 85, 86, 93, 102, 105, 108, 119, 123, 124, 125, 165]	[3, 30, 96, 98, 84, 2, 111, 97, 99, 101, 103, 112, 132, 130, 140, 146, 90, 94, 95, 104, 114]	0.0865225	0.10219	0.0156673	0.326037	0.0326545	0.00635803	0.000591158	0.152816	0.0430397	3	11	9	32	27	40	30	99	19	25	1	44	4	38	13	32	1	4	0	0	5	13	0	1	0	0	0	0	0
DNAJA2	ENSG00000069345.12	chr16	-	46955362	46957220	ALJ	TRUE	1.41254e-05	2.02325e-08	[4, 68, 57, 1, 77, 41, 72, 101, 122, 133, 166, 70, 76, 120, 126, 132, 143, 13, 16, 49, 56, 67, 93, 127, 131, 140, 153, 174, 176, 180, 190, 7, 8, 10, 18, 27, 44, 47, 71, 79, 92, 94, 113, 123, 128, 130, 134, 135, 138, 139, 141, 142, 145, 148, 150, 154, 156, 167, 168, 169, 175, 177, 178, 179, 183, 187, 189, 191, 202, 203, 207, 210]	[0, 9, 17, 6, 2, 28, 51, 5, 32, 31, 35, 59, 14, 19, 3, 23, 39, 21, 40, 15, 43, 45, 25, 34, 58, 62, 63, 91, 107, 22, 65, 38, 50, 53, 83, 111, 124, 129, 152, 54, 73, 85, 102, 144, 155, 159, 182, 11, 12, 24, 30, 33, 37, 60, 64, 86, 98, 99, 103, 105, 108, 109, 114, 117, 162, 164, 170, 185, 193, 198, 20, 26, 29, 36, 42, 46, 48, 55, 61, 66, 69, 74, 75, 78, 80, 81, 82, 87, 88, 89, 90, 95, 96, 97, 100, 1…	0.433702	0.262038	0.171663	0.785781	0.0158826	0.966	0.000692042	0.874479	0.015402	85	99	98	112	83	99	26	50	117	136	22	37	127	148	45	67	7	8	13	29	27	37	36	62	3	3	35	42	66
CD72	ENSG00000137101.13	chr9	-	35616270	35616599	IR	TRUE	1.45122e-05	2.09657e-08	[11, 21, 140, 149, 159, 163, 192, 136, 9, 10, 137, 142, 148, 151, 158, 161, 162, 165, 168, 46, 175, 180, 183, 184, 186, 187, 196, 197]	[2, 33, 49, 24, 69, 27, 25, 52, 89, 15, 38, 50, 58, 65, 41, 77, 78, 30, 74, 91, 92, 19, 36, 48, 55, 56, 62, 67, 83, 88, 90, 119, 122, 133, 188, 3, 5, 7, 14, 16, 20, 22, 23, 34, 35, 37, 57, 60, 64, 68, 71, 73, 75, 76, 80, 82, 84, 86, 87, 94, 97, 98, 101, 102, 104, 105, 107, 108, 109, 111, 112, 115, 116, 120, 121, 123, 125, 127, 128, 130, 131, 132, 134, 135, 150, 153, 160, 167, 170, 171, 173, 174, …	1	1	0	0.567495	0.0194611	0.993368	7.7147e-08	0.805555	0.0616708	2	9	8	14	3	4	6	14	1	2	17	19	18	34	2	6	0	0	0	0	2	2	0	0	0	0	0	0	1
RUBCNL	ENSG00000102445.20	chr13	-	46368627	46368732	IR	TRUE	1.48726e-05	2.167e-08	[204, 65, 73, 157, 1668, 395, 510, 1147, 2089, 3400, 3360, 1971, 479, 1997, 1761, 487, 1280, 904, 1658, 3070, 3550, 2448, 3486, 2346, 3026, 3391, 2145, 3423, 416, 2148, 3475, 2792, 3402, 458, 3458, 3591, 2451, 568, 2845, 7, 729, 3361, 1397, 1129, 3352, 3408, 3464, 3495, 3505, 3578, 3654, 3702, 3736, 4153, 4461, 662, 920, 1159, 3500, 3525, 3527, 3548, 3567, 1582, 3871, 4222, 2458, 3446, 3462, 3470…	[123, 12, 6, 128, 49, 619, 457, 136, 189, 83, 221, 82, 211, 103, 113, 148, 657, 339, 108, 84, 710, 68, 285, 610, 212, 480, 31, 788, 164, 465, 786, 63, 625, 387, 663, 1057, 384, 220, 218, 138, 371, 691, 725, 685, 348, 620, 963, 621, 244, 344, 404, 1011, 382, 781, 1080, 1481, 263, 1422, 2161, 242, 632, 707, 794, 1733, 965, 943, 22, 613, 192, 1652, 483, 74, 267, 640, 1181, 602, 1008, 1039, 1540, 95,…	0.997419	0.99973	0.00231113	0.721424	0.0547329	0.960441	0.000203208	0.837797	0.0258511	790	850	1220	3647	2124	2273	1386	2176	1056	1138	656	979	507	524	269	282	2	3	0	4	0	2	0	0	0	0	0	0	2
DNAJA2	ENSG00000069345.12	chr16	-	46955362	46955622	ALJ	TRUE	1.49875e-05	2.20225e-08	[0, 9, 17, 6, 2, 28, 51, 52, 5, 32, 31, 1, 35, 59, 14, 19, 3, 23, 39, 21, 40, 15, 43, 45, 25, 34, 58, 62, 63, 91, 107, 22, 65, 38, 50, 53, 83, 101, 111, 124, 129, 152, 54, 70, 73, 84, 85, 102, 120, 126, 144, 155, 159, 182, 11, 12, 16, 24, 30, 33, 37, 49, 56, 60, 64, 86, 93, 98, 99, 103, 105, 108, 109, 114, 117, 131, 162, 164, 170, 174, 180, 185, 193, 198, 7, 18, 20, 26, 27, 29, 36, 42, 46, 48, 55…	[4, 68, 57, 77, 41, 133, 166, 72, 122, 132, 143, 76, 13, 140, 153, 176, 190, 67, 127, 128, 134, 8, 135, 10, 138, 139, 141, 142, 145, 150, 156, 163, 167, 169, 44, 47, 175, 177, 178, 179, 183, 187, 189, 202, 203, 207, 123]	0.27105	0.42623	0.15518	0.186518	0.0139341	0.0245864	0.000383834	0.107016	0.0130847	13	99	12	112	12	100	21	50	18	136	15	37	18	148	19	67	1	8	15	29	8	38	23	62	0	5	7	42	6
BRD9	ENSG00000028310.18	chr5	-	869394	870472	3AS	FALSE	1.70457e-05	2.52572e-08	[230, 18, 212, 24, 238, 258, 219, 231, 261, 389, 141, 143, 271, 19, 150, 155, 37, 431, 432, 330, 333, 206, 226, 104, 249, 250, 445]	[54, 113, 57, 159, 289, 66, 58, 92, 126, 306, 86, 80, 382, 59, 77, 88, 118, 399, 71, 87, 131, 169, 190, 239, 304, 311, 313, 314, 322, 324, 336, 340, 387, 400, 434, 3, 16, 28, 47, 48, 50, 53, 55, 56, 60, 61, 63, 64, 65, 67, 68, 69, 70, 81, 83, 84, 85, 89, 90, 91, 93, 94, 95, 100, 101, 103, 105, 107, 108, 109, 110, 112, 114, 115, 117, 120, 121, 124, 125, 127, 129, 130, 132, 136, 154, 157, 161, 165,…	1	0.961219	0.0387812	0.956058	0.0022951	0.416868	0.000242378	0.771644	0.070845	10	12	25	25	28	28	30	31	8	8	4	6	17	17	11	11	2	2	1	1	3	4	15	15	0	0	2	3	2
THOC1	ENSG00000079134.12	chr18	-	224179	224923	3AS	FALSE	1.72223e-05	2.57316e-08	[0, 1, 15, 95, 65, 10, 11, 3, 50, 6, 106, 8, 34, 21, 120, 73, 33, 38, 27, 113, 204, 291, 24, 59, 98, 268, 68, 173, 174, 240, 23, 142, 143, 56, 89, 91, 102, 105, 133, 154, 158, 160, 203, 221, 381, 7, 57, 85, 117, 118, 129, 136, 144, 145, 151, 155, 170, 171, 176, 205, 245, 269, 296, 305, 377, 379, 391, 419, 12, 16, 30, 43, 67, 83, 93, 103, 104, 108, 110, 111, 112, 115, 128, 131, 135, 147, 153, 157,…	[2, 94, 39, 25, 226, 31, 266, 70, 492, 260, 20, 148, 410, 156, 412, 318, 66, 247, 513, 514, 393, 267, 396, 397, 270, 272, 402, 22, 278, 411, 29, 285, 287, 413, 415, 292, 166, 40, 41, 42, 45, 46, 429, 434, 179, 307, 181, 309, 436, 186, 320, 321, 324, 330, 79, 337, 82, 466, 344, 353, 363, 505, 509, 126]	0.707304	0.473881	0.233423	0.214695	0.0120131	0.0396745	0.00049357	0.129948	0.0136777	18	73	12	69	3	71	7	58	13	70	5	69	2	57	9	29	2	12	2	10	1	7	8	29	10	23	1	2	10
TTK	ENSG00000112742.10	chr6	+	80040703	80042118	3AS	TRUE	1.81069e-05	2.74678e-08	[0, 1, 4, 2, 5, 15, 100, 17, 10, 16, 19, 24, 27, 74, 77, 99, 145, 26, 92, 93, 116, 3, 14, 21, 45, 103, 137, 140, 141, 167, 174, 13, 35, 53, 60, 84, 91, 104, 122, 134, 135, 136, 138, 185, 31, 42, 46, 49, 75, 80, 87, 97, 98, 113, 126, 139, 146, 159, 160, 165, 173, 188, 191, 209, 220, 7, 8, 9, 18, 20, 22, 23, 28, 29, 32, 39, 43, 50, 51, 55, 58, 59, 61, 63, 64, 65, 66, 67, 68, 69, 70, 71, 72, 73, 81,…	[6, 37, 33, 56, 178, 57, 133, 163, 47, 79, 131, 132, 154, 40, 41, 48, 52, 54, 190, 192, 195, 197, 78, 85, 90, 222]	0.129291	0.1	0.0292906	0.0886704	0.000469685	0.00863227	1.99706e-06	0.0497195	0.00208438	0	2	0	4	0	2	1	6	0	4	0	3	0	1	0	2	7	49	12	84	0	2	11	135	1	19	0	19	3
SSRP1	ENSG00000149136.9	chr11	-	57333071	57333434	IR	TRUE	1.81069e-05	2.75004e-08	[23, 35, 224, 237, 118, 57, 63]	[34, 6, 17, 127, 8, 134, 95, 131, 70, 87, 139, 159, 170, 54, 111, 149, 152, 160, 38, 173, 66, 67, 83, 219, 104, 120, 126, 140, 142, 143, 16, 146, 163, 168, 172, 180, 59, 188, 193, 68, 71, 72, 75, 80, 81, 209, 85, 89, 91, 94, 100, 102, 103, 107, 235, 109, 110, 114, 119, 124]	0.0327869	0.76834	0.735553	0.437171	0.0430082	0.95313	0.0206983	0.686936	0.105945	2	2	7	9	3	6	33	46	0	0	0	0	4	5	1	4	0	0	0	6	2	5	4	11	0	0	2	3	3
ARHGAP25	ENSG00000163219.12	chr2	+	68787956	68807272	ES	TRUE	1.94422e-05	2.97686e-08	[11, 24, 12, 23, 19, 15, 46, 51, 106, 104, 124, 144, 28, 67, 16, 189, 65, 58, 20, 103, 155, 251, 266, 75, 181, 197, 54, 50, 142, 9, 171, 196, 10, 105, 176, 87, 98, 227, 237, 268, 299, 179, 375, 5, 62, 132, 186, 200, 550, 188, 205, 246, 250, 513, 59, 83, 139, 438, 548, 1, 57, 259, 281, 526, 539, 0, 44, 219, 224, 267, 279, 284, 312, 315, 367, 540, 665, 29, 71, 82, 96, 111, 129, 137, 223, 229, 320, …	[32, 248, 133, 231, 33, 116, 66, 166, 433, 175, 498, 131, 167, 497, 86, 613, 115, 672, 173, 740, 673, 709, 780, 160, 741, 746, 313, 333, 619, 135, 685, 177, 276, 792, 813, 319, 85, 614, 158, 688, 721, 749, 754, 771, 789, 790, 815, 371, 549, 668, 689, 704, 728, 233, 753, 777, 781, 787, 277, 803, 824, 321, 336, 442, 996, 1014, 1025, 1035, 1039, 1041, 530, 1021, 1045, 1055, 1057, 1056, 1058, 556, 53…	0.245414	1	0.754586	0.162384	0.012742	0.0244665	0.000372138	0.0942098	0.0104744	48	296	161	1087	240	2301	440	1700	78	413	11	353	62	1542	3	188	8	34	19	97	17	90	19	50	0	0	10	28	8
TTK	ENSG00000112742.10	chr6	+	80042097	80043578	ALJ	TRUE	2.00388e-05	3.1002e-08	[0, 1, 4, 2, 5, 15, 100, 17, 10, 16, 19, 24, 11, 27, 74, 77, 99, 145, 26, 92, 93, 116, 3, 14, 21, 45, 103, 137, 140, 141, 167, 174, 13, 25, 35, 53, 60, 84, 91, 104, 122, 134, 135, 136, 138, 185, 31, 38, 42, 46, 49, 62, 75, 80, 87, 97, 98, 113, 126, 139, 146, 157, 159, 160, 165, 173, 176, 180, 188, 191, 209, 210, 220, 7, 8, 9, 12, 18, 20, 22, 23, 28, 29, 30, 32, 34, 36, 39, 43, 44, 48, 50, 51, 55,…	[6, 37, 33, 56, 178, 57, 133, 163, 47, 79, 131, 132, 154, 40, 41, 52, 54, 190, 192, 195, 197, 78, 85, 90, 222]	0.13148	0.100559	0.0309214	0.0868775	0.000448797	0.00854619	7.66884e-07	0.0490219	0.0020018	0	2	0	4	0	2	1	6	0	4	0	3	0	1	0	2	7	49	12	84	0	2	11	137	1	19	0	19	3
TTK	ENSG00000112742.10	chr6	+	80042118	80042673	ALJ	FALSE	2.00388e-05	3.11769e-08	[6, 37, 33, 56, 178, 25, 57, 38, 47, 62, 79, 133, 157, 163, 176, 180, 210, 12, 23, 36, 40, 41, 44, 48, 52, 54, 78, 82, 85, 90, 96, 131, 132, 143, 154, 175, 190, 192, 195, 197, 212, 222]	[0, 1, 4, 2, 5, 15, 100, 17, 10, 16, 19, 24, 11, 27, 74, 77, 99, 145, 26, 92, 93, 116, 3, 14, 21, 45, 103, 137, 140, 141, 167, 174, 13, 35, 53, 60, 84, 91, 104, 122, 134, 135, 136, 138, 185, 31, 42, 46, 49, 75, 80, 87, 97, 98, 113, 126, 139, 146, 159, 160, 165, 173, 188, 191, 209, 220, 7, 8, 9, 18, 20, 22, 28, 29, 30, 32, 34, 39, 43, 50, 51, 55, 58, 59, 61, 63, 64, 65, 66, 67, 68, 69, 70, 71, 72,…	0.127451	0.129693	0.00224185	0.902846	0.000450232	0.985056	3.26963e-07	0.942739	0.00203936	2	2	4	4	2	2	5	6	4	4	3	3	1	1	2	2	42	49	72	84	2	2	124	137	18	19	19	19	78
SLTM	ENSG00000137776.17	chr15	-	58888511	58889429	IR	TRUE	2.28855e-05	3.58884e-08	[101, 129, 481, 485, 519, 576, 823, 928, 154, 199, 295, 924, 925, 950, 469, 1009, 680, 208, 741, 755, 834, 863, 957, 972, 1000, 1035, 153, 1224, 713, 835, 836, 837, 839, 856, 1384, 1386, 1449, 941, 944, 505, 1032, 1037, 1039, 1055, 1058, 1071, 1080, 1088, 1095, 1106, 1115, 111, 119, 132, 167, 191, 714, 1238, 1252, 1265, 1266, 1282, 266, 1293, 272, 1296, 1297, 277, 1302, 280, 792, 288, 1312, 806, …	[475, 490, 548, 523, 30, 492, 255, 35, 393, 171, 374, 656, 789, 311, 608, 1006, 639, 520, 530, 542, 417, 440, 567, 1083, 846, 988, 989, 96, 621, 241, 1014, 641, 387, 5, 395, 1038, 146, 532, 1046, 791, 279, 1050, 410, 541, 797, 800, 419, 802, 804, 426, 685, 1202, 692, 832, 332, 1104, 722, 468, 853, 983, 728, 604, 1116, 247, 1123, 745, 746, 749, 750, 240, 1015, 632, 380]	1	1	0	0.251957	1.54783e-05	0.772409	0.03262	0.465688	0.0797587	0	15	10	41	10	38	15	54	3	13	4	8	6	14	3	7	0	1	0	0	2	3	0	5	0	0	0	0	0
NAA16	ENSG00000172766.19	chr13	+	41372830	41373767	3AS	FALSE	2.33404e-05	3.689e-08	[31, 67, 36, 189, 233, 21, 68, 33, 340, 347, 224, 226, 409, 59, 62, 319, 326, 216, 346, 223, 229, 236, 247, 250, 264, 265, 18, 22, 27, 320, 323, 72, 205, 207, 341, 342, 344, 219, 353, 227, 359, 232, 240, 243]	[1, 3, 5, 15, 24, 14, 2, 80, 16, 61, 74, 48, 295, 138, 78, 122, 172, 10, 55, 108, 135, 184, 296, 7, 23, 26, 77, 114, 115, 119, 127, 166, 329, 389, 17, 25, 47, 66, 87, 91, 109, 121, 124, 132, 142, 144, 145, 156, 160, 176, 191, 203, 322, 327, 381, 12, 34, 35, 37, 38, 42, 83, 120, 129, 130, 136, 151, 162, 182, 193, 194, 234, 269, 273, 276, 279, 280, 288, 304, 321, 328, 330, 336, 345, 365, 366, 376, …	1	0.613014	0.386986	0.763564	0.0176557	0.98216	0.000423625	0.874353	0.0210973	10	14	19	37	39	55	11	28	8	11	15	16	40	50	5	6	5	8	19	22	3	3	17	33	0	0	0	0	6
MAP3K7	ENSG00000135341.18	chr6	-	90515109	90515907	IR	TRUE	2.33721e-05	3.72287e-08	[43, 62, 64, 129, 308, 39, 312, 3, 255, 384, 272, 302, 307, 311, 315, 208, 115, 262, 397, 402, 275, 406, 412, 427, 45, 303, 48, 428, 51, 313, 316, 326, 327, 72, 73, 338, 366]	[15, 126, 97, 27, 267, 38, 13, 116, 4, 8, 224, 128, 401, 34, 292, 47, 191, 192, 195, 222, 98, 228, 354, 113, 382, 131, 266, 146, 276, 405, 26, 155, 30, 33, 36, 40, 172, 173, 46, 174, 181, 182, 439, 440, 190, 63, 65, 193, 68, 196, 74, 336, 337, 339, 215, 351, 225, 353, 102, 104, 105, 107, 364, 365, 114, 243, 117, 245, 376, 452, 454, 462, 463]	1	0.92268	0.0773196	0.356199	0.0447538	0.869944	0.00334023	0.586724	0.084212	0	7	7	27	9	29	3	32	1	14	8	12	10	14	2	5	0	2	0	1	1	2	1	10	4	4	0	3	1
ECT2	ENSG00000114346.14	chr3	+	172755374	172756982	ES	FALSE	2.46134e-05	3.95099e-08	[0, 4, 8, 1, 17, 6, 3, 11, 80, 24, 96, 150, 60, 51, 95, 155, 111, 124, 18, 145, 210, 249, 289, 9, 16, 20, 33, 74, 109, 148, 156, 167, 172, 205, 246, 7, 12, 22, 31, 34, 43, 44, 57, 69, 76, 77, 78, 104, 108, 116, 136, 151, 153, 160, 180, 204, 233, 240, 2, 10, 13, 14, 15, 21, 23, 26, 27, 28, 29, 32, 35, 36, 37, 40, 62, 63, 72, 73, 75, 79, 85, 97, 99, 100, 101, 105, 106, 107, 110, 114, 119, 120, 125,…	[25, 41, 49, 5, 19, 68, 70, 47, 53, 38, 39, 55, 50, 52, 203, 128, 267, 290, 56, 61, 86, 112, 121, 131, 133, 192, 193, 202, 242, 243, 248, 262, 272, 42, 46, 48, 54, 71, 81, 83, 87, 88, 89, 90, 91, 98, 113, 132, 134, 139, 142, 161, 190, 191, 198, 199, 216, 218, 220, 231, 237, 239, 251, 255, 261, 263, 264, 265, 268, 271, 273, 274, 276, 279, 284, 287, 297]	0.0695781	0.223969	0.15439	0.313099	0.0214718	0.0486986	1.077e-05	0.180972	0.0283448	4	19	2	10	0	15	1	8	2	4	2	10	0	9	0	0	12	30	12	54	0	1	11	69	0	0	1	5	12
TAF2	ENSG00000064313.12	chr8	-	119794841	119795531	3AS	TRUE	2.50443e-05	4.05107e-08	[303, 8, 314, 342, 488, 137, 651, 524, 13, 400, 274, 767, 278, 279, 24, 415, 417, 418, 38, 328, 458, 485, 492, 116, 383]	[34, 81, 554, 557, 531, 586, 734, 762, 525, 72, 85, 602, 740, 774, 83, 84, 90, 93, 111, 640, 661, 191, 202, 715, 744, 795, 805, 806, 515, 517, 518, 521, 523, 528, 19, 534, 539, 542, 578, 579, 68, 581, 71, 74, 76, 78, 79, 591, 86, 87, 91, 95, 96, 609, 610, 612, 101, 613, 103, 615, 105, 616, 107, 108, 109, 110, 618, 621, 627, 628, 654, 143, 657, 660, 163, 164, 167, 172, 176, 178, 180, 181, 697, 187…	1	1	0	0.97947	1.35596e-06	0.252031	0.0209476	0.741607	0.120196	2	2	18	19	12	12	16	16	12	12	4	5	4	5	3	3	0	0	0	0	1	1	24	24	0	0	2	2	8
ZBED5	ENSG00000236287.8	chr11	-	10852796	10855086	ALJ	TRUE	2.89126e-05	4.7125e-08	[1, 2, 12, 9, 4, 3, 16, 23, 28, 15, 6, 11, 25, 30, 47, 17, 21, 37, 42, 44, 50, 68, 18, 19, 22, 29, 43, 45, 49, 70, 72, 74, 76, 85, 93, 7, 14, 20, 24, 26, 32, 33, 34, 35, 36, 38, 39, 46, 48, 52, 53, 54, 56, 57, 58, 59, 60, 62, 65, 66, 69, 71, 73, 75, 77, 79, 80, 81, 82, 84, 86, 87, 88, 89, 90, 91, 92, 94, 95, 96, 97, 98, 99, 100, 101, 102, 103, 104, 105, 106, 107, 108, 109, 110]	[0, 8, 5, 13, 51, 41, 10, 55, 63, 64, 67, 40, 78, 83, 27, 61, 31]	0.22642	0.359598	0.133178	0.331404	0.012902	0.578456	0.0117243	0.451557	0.0268292	96	370	217	1025	249	763	128	825	150	342	152	299	353	620	28	96	8	37	11	47	32	64	23	61	0	4	12	30	13
ZC3H11A	ENSG00000058673.17	chr1	+	203801628	203802956	3AS	FALSE	3.10281e-05	5.09562e-08	[30, 5, 1, 18, 26, 60, 198, 65, 178, 193, 80, 214, 317, 36, 182, 400, 107, 218, 21, 656, 201, 291, 325, 319, 364, 368, 463, 15, 16, 38, 598, 156, 759, 760, 765, 793, 798, 351, 354, 406, 445, 534, 543, 544, 39, 54, 64, 67, 68, 74, 79, 82, 96, 608, 610, 616, 644, 653, 147, 173, 188, 706, 204, 206, 212, 231, 232, 234, 761, 762, 766, 256, 775, 788, 280, 283, 286, 799, 308, 340, 376, 388, 407, 411, 42…	[20, 13, 58, 90, 140, 101, 86, 117, 56, 91, 172, 175, 160, 69, 88, 195, 78, 233, 153, 35, 112, 130, 163, 169, 211, 95, 55, 120, 123, 137, 374, 32, 177, 208, 577, 591, 104, 109, 111, 118, 185, 199, 245, 264, 277, 549, 45, 581, 116, 124, 152, 155, 168, 213, 737, 228, 241, 252, 254, 255, 263, 275, 284, 318, 344, 501, 525, 546, 550, 71, 583, 585, 586, 83, 84, 600, 604, 618, 119, 121, 628, 125, 126, 6…	0.34901	0.982725	0.633715	0.729466	0.0229424	0.35516	0.0162779	0.549017	0.0544332	78	83	132	180	62	91	108	112	28	39	23	66	38	54	10	15	16	25	9	11	8	15	50	65	0	0	1	1	5
LINC00847	ENSG00000245060.8	chr5	+	180837105	180839801	ALJ	TRUE	3.11806e-05	5.15916e-08	[2, 0, 1, 15, 16, 18, 24, 3, 23, 11, 13, 39, 6, 7, 10, 14, 17, 19, 20, 21, 22, 36, 37, 38, 40, 41, 42]	[5, 8, 30, 4, 26, 35, 27, 28, 9, 31, 32, 33, 34, 12, 25, 29]	1	1	0	0.735419	0.042302	0.0885118	0.0629358	0.431553	0.13853	9	10	30	32	15	19	35	36	13	13	5	6	1	6	7	10	2	2	1	2	0	0	4	4	0	0	0	0	1
FOXP1	ENSG00000114861.23	chr3	-	70970194	70970735	IR	TRUE	3.27367e-05	5.45706e-08	[21, 582, 22, 583, 341, 298, 652, 619, 628, 629, 729, 631, 648, 720, 682, 286, 580, 728, 733, 748, 760, 269, 285, 824, 23, 588, 609, 622, 634, 716, 717, 730, 739, 742, 745, 754, 755, 761, 775, 581, 610, 612, 618, 620, 627, 117, 632, 636, 640, 641, 644, 646, 647, 650, 651, 724, 736, 737, 738, 740, 743, 766, 767, 770, 772, 774, 776, 781, 804, 805, 806, 808, 822, 823, 852, 854, 860, 909]	[98, 9, 25, 243, 38, 293, 294, 158, 153, 210, 247, 347, 160, 458, 430, 99, 39, 290, 338, 425, 744, 248, 292, 428, 154, 249, 764, 773, 287, 288, 291, 297, 839, 337, 340, 388, 431, 3, 24, 617, 159, 684, 685, 211, 746, 747, 759, 757, 807, 826, 842, 844, 335, 342, 348, 390, 426, 427, 429, 980, 483, 485, 513, 19, 20, 559, 560, 57, 74, 75, 587, 624, 625, 116, 118, 637, 639, 642, 643, 649, 151, 152, 155…	0.188235	0.392086	0.203851	0.663946	0.0269662	0.988214	0.000821163	0.842696	0.042883	45	67	55	131	57	78	105	251	31	45	24	52	50	52	18	24	0	1	0	0	2	2	2	6	1	1	0	0	1
PTPN7	ENSG00000143851.15	chr1	-	202153835	202154185	3AS	TRUE	3.31306e-05	5.58406e-08	[3, 19, 11, 8, 9, 28, 44, 123, 133, 10, 12, 144, 122, 17, 2, 81, 165, 52, 37, 136, 21, 6, 5, 164, 66, 120, 141, 156, 29, 84, 82, 192, 193, 13, 24, 119, 126, 151, 311, 32, 112, 147, 291, 299, 7, 35, 49, 115, 142, 152, 181, 199, 288, 31, 134, 149, 212, 246, 303, 39, 58, 74, 89, 96, 113, 128, 137, 139, 143, 145, 198, 203, 205, 257, 265, 334, 345, 350, 40, 43, 153, 159, 200, 236, 272, 277, 287, 322, …	[87, 135, 45, 258, 161, 238, 71, 140, 16, 47, 65, 88, 106, 194, 224, 247, 388, 262, 273, 83, 95, 172, 177, 180, 190, 204, 237, 248, 274, 296, 339, 375, 381, 403, 409, 429, 449, 450, 455, 25, 75, 79, 80, 91, 100, 101, 102, 118, 124, 183, 213, 216, 218, 222, 239, 245, 249, 253, 260, 263, 264, 270, 278, 280, 292, 293, 333, 348, 362, 363, 377, 383, 386, 392, 398, 405, 406, 407, 408, 414, 416, 418, 41…	0.373278	0.912752	0.539473	0.168043	0.00200797	0.0441374	0.00065998	0.102475	0.00551388	0	2	9	44	10	55	38	178	1	3	0	3	11	122	0	8	0	0	22	129	1	7	37	170	0	0	11	52	2
FAR2	ENSG00000064763.11	chr12	+	29270638	29307657	3AS	TRUE	3.31306e-05	5.60453e-08	[27, 62, 8, 137, 115, 56, 152]	[12, 85, 136, 9, 138, 78, 81, 104, 113, 132, 145, 146, 148, 150, 33, 37, 80, 91, 105, 107, 121]	1	0.0810811	0.918919	0.910734	0.000536645	0		0.701037	0.0702048	0	0	0	0	0	0	0	0	0	0	0	0	0	0	0	0	33	33	4	4	1	1	0	0	0	0	0	0	9
APPL2	ENSG00000136044.12	chr12	-	105208029	105208157	3AS	FALSE	3.33112e-05	5.67623e-08	[0, 13, 57, 2, 9, 76, 63, 86, 81, 55, 79, 148, 169, 42, 23, 38, 112, 135, 56, 64, 68, 174, 184, 12, 15, 35, 37, 41, 95, 119, 136, 188, 264, 266, 1, 5, 7, 24, 36, 49, 51, 62, 87, 113, 114, 115, 127, 129, 149, 172, 186, 187, 194, 197, 213, 217, 259, 261, 265, 3, 4, 8, 11, 17, 27, 32, 34, 39, 44, 47, 48, 58, 61, 66, 72, 75, 77, 78, 80, 83, 84, 85, 88, 96, 97, 98, 102, 103, 104, 106, 107, 108, 109, 1…	[6, 16, 130, 65, 100, 138, 14, 170, 132, 142, 18, 150, 157, 40, 207, 218, 221, 233, 253, 128, 131, 133, 10, 141, 270, 19, 20, 274, 22, 276, 25, 280, 155, 156, 30, 31, 282, 283, 284, 165, 166, 43, 176, 180, 59, 190, 206, 209, 215, 220, 94, 223, 224, 230, 235, 236, 238, 243, 245, 246, 247, 250, 251, 252, 126, 255]	0.237028	0.261538	0.0245102	0.318511	0.0260285	0.056236	1.35102e-05	0.194327	0.0300276	4	11	23	52	12	28	8	30	9	17	1	22	8	75	2	3	11	20	0	9	0	16	7	17	0	0	2	5	10
ATF1	ENSG00000123268.9	chr12	+	50780238	50795908	3AS	TRUE	3.50137e-05	6.00956e-08	[0, 8, 9, 14, 10, 41, 12, 21, 25, 100, 2, 29, 18, 23, 45, 30, 33, 49, 57, 3, 22, 83, 40, 55, 36, 37, 62, 24, 47, 52, 54, 71, 85, 26, 31, 51, 61, 65, 69, 75, 94, 95, 99, 102, 103, 107, 116, 133, 147, 6, 11, 16, 19, 27, 39, 43, 44, 46, 50, 56, 58, 60, 63, 64, 66, 67, 68, 70, 76, 77, 78, 79, 87, 88, 89, 91, 92, 96, 101, 111, 112, 113, 114, 115, 117, 118, 119, 120, 122, 125, 128, 129, 130, 131, 132, …	[1, 84, 106, 38, 42, 48, 82, 86, 134, 15, 145, 20, 80, 81, 90, 104, 105, 109, 110, 123]	0.04714	0.99654	0.9494	0.116709	0.0016903	0.0391143	1.8007e-06	0.07792	0.00213353	12	118	20	138	15	138	20	93	14	106	7	98	12	210	7	56	9	38	3	21	1	24	5	41	1	7	0	18	1
IMMT	ENSG00000132305.21	chr2	-	86171312	86173649	3AS	FALSE	3.66912e-05	6.37751e-08	[1, 2, 36, 105, 65, 16, 194, 28, 67, 128, 184, 53, 185, 74, 165, 96, 129, 69, 139, 142, 31, 327, 23, 38, 179, 50, 60, 72, 107, 183, 211, 182, 209, 342, 55, 118, 145, 186, 201, 233, 347, 360, 398, 9, 76, 93, 127, 167, 188, 215, 235, 274, 287, 288, 328, 341, 352, 394, 415, 14, 15, 19, 22, 25, 26, 40, 41, 43, 46, 51, 52, 70, 77, 84, 90, 101, 111, 116, 119, 121, 124, 135, 138, 146, 150, 154, 155, 156…	[0, 4, 42, 58, 11, 48, 29, 20, 193, 57, 32, 54, 68, 39, 44, 168, 95, 47, 63, 79, 206, 236, 115, 269, 297, 66, 286, 49, 170, 281, 5, 62, 258, 343, 24, 85, 98, 112, 126, 143, 164, 169, 180, 376, 397, 419, 27, 33, 64, 73, 78, 81, 82, 87, 91, 100, 104, 152, 158, 162, 187, 190, 199, 216, 223, 227, 254, 270, 280, 294, 332, 335, 337, 339, 340, 344, 349, 362, 369, 379, 396, 411, 420, 429, 7, 35, 71, 80, …	0.0541004	0.0509938	0.00310657	0.602441	0.00307588	0.454495	0.00625283	0.531017	0.00997833	135	206	169	299	249	490	248	332	120	202	109	194	209	407	119	225	35	57	119	240	83	128	145	243	0	0	66	102	93
TPP2	ENSG00000134900.12	chr13	+	102645009	102646293	3AS	TRUE	3.66912e-05	6.38809e-08	[0, 8, 4, 3, 32, 25, 36, 27, 10, 309, 28, 35, 543, 167, 19, 127, 140, 302, 335, 369, 396, 16, 24, 59, 570, 95, 193, 301, 334, 444, 12, 124, 126, 129, 176, 184, 198, 266, 287, 303, 326, 349, 359, 375, 400, 430, 487, 13, 37, 545, 553, 47, 48, 54, 100, 106, 111, 128, 136, 139, 157, 161, 177, 194, 206, 239, 241, 297, 304, 308, 325, 331, 342, 345, 355, 356, 357, 361, 363, 366, 368, 374, 377, 378, 384,…	[90, 58, 82, 76, 70, 217, 271, 580, 584, 328, 492, 498, 505, 572, 62, 81, 88, 97, 621, 112, 210, 214, 220, 233, 242, 246, 255, 260, 411, 504, 507, 508, 512, 513, 514, 520, 533, 552, 57, 63, 64, 71, 78, 80, 595, 84, 85, 89, 92, 94, 98, 612, 102, 615, 616, 105, 617, 618, 108, 619, 620, 634, 636, 204, 209, 213, 218, 221, 228, 230, 232, 247, 249, 251, 253, 258, 261, 264, 267, 269, 272, 276, 277, 279,…	0.172234	1	0.827766	0.224811	0.0377701	0.00520145	0.000235914	0.103233	0.0335017	5	16	8	48	7	81	32	36	4	20	0	29	0	51	1	5	1	12	2	6	0	3	6	8	0	0	0	0	1
ABCB7	ENSG00000131269.19	chrX	-	75071683	75073688	3AS	FALSE	3.85618e-05	6.78784e-08	[0, 2, 5, 16, 69, 43, 48, 7, 65, 3, 54, 124, 6, 47, 51, 127, 42, 66, 103, 115, 252, 12, 14, 57, 72, 75, 86, 89, 90, 92, 108, 122, 160, 163, 164, 169, 176, 223, 250, 271, 1, 8, 10, 11, 15, 17, 29, 31, 32, 34, 40, 50, 52, 64, 68, 74, 77, 81, 91, 100, 101, 107, 110, 111, 114, 119, 120, 126, 130, 131, 133, 134, 135, 136, 137, 141, 142, 149, 151, 152, 153, 156, 157, 158, 161, 162, 183, 195, 206, 213, …	[37, 33, 167, 201, 20, 172, 190, 166, 196, 199, 239, 257, 259, 260, 266, 13, 21, 276, 24, 26, 39, 41, 173, 177, 179, 189, 192, 193, 200, 202, 207, 210, 234, 236]	0.127835	1	0.872165	0.163898	0.0171291	0.00506414	1.57648e-07	0.0799429	0.0158892	11	27	2	20	16	35	11	24	2	18	1	28	0	27	2	13	2	7	0	3	1	16	3	13	0	0	2	4	0
SLC25A13	ENSG00000004864.14	chr7	-	96193183	96208837	ES	TRUE	3.85618e-05	6.80899e-08	[0, 5, 20, 6, 13, 2, 73, 9, 150, 141, 52, 97, 1, 7, 16, 128, 161, 19, 72, 34, 41, 65, 51, 79, 91, 151, 185, 26, 48, 67, 89, 186, 298, 3, 21, 24, 39, 43, 47, 88, 27, 33, 62, 85, 120, 135, 139, 152, 156, 168, 177, 178, 200, 204, 206, 259, 290, 10, 12, 22, 49, 54, 57, 66, 75, 84, 100, 103, 114, 131, 146, 147, 159, 163, 164, 173, 182, 189, 198, 212, 221, 226, 232, 235, 237, 247, 268, 280, 282, 284, 2…	[36, 55, 58, 176, 11, 258, 281, 165, 299, 245, 255, 262, 264, 157, 46, 318, 64, 78, 104, 243, 267, 269, 271, 18, 275, 276, 277, 278, 283, 287, 40, 44, 45, 301, 302, 50, 305, 306, 53, 56, 59, 316, 317, 323, 324, 325, 70, 71, 81, 82, 253, 238, 240, 241, 117, 119, 121, 252, 125]	0.358588	1	0.641412	0.220354	0.0230943	0.012802	0.000574249	0.11987	0.0277381	6	20	13	42	14	48	22	38	3	13	6	12	4	26	3	13	0	3	3	22	3	7	2	15	0	0	1	2	6
SMARCA5	ENSG00000153147.6	chr4	+	143545583	143545909	IR	TRUE	4.18131e-05	7.43473e-08	[118, 74, 262, 324, 351, 254, 510, 519, 521, 402, 409, 62, 454, 456, 330, 469, 472, 359, 491, 492, 496, 498]	[81, 88, 225, 222, 115, 308, 198, 82, 306, 202, 331, 143, 227, 357, 103, 238, 245, 378, 410, 288, 299, 435, 310, 312, 315, 317, 325, 199, 329, 203, 208, 211, 336, 350, 104, 364, 253, 383, 526, 542]	0.994413	1	0.00558659	0.396287	0.0529507	0.926649	3.36541e-05	0.600521	0.0973427	7	23	29	41	73	99	43	78	5	21	5	9	22	26	2	2	0	0	1	1	0	2	1	8	0	0	0	0	0
MALAT1	ENSG00000251562.8	chr11	+	65501437	65501581	IR	TRUE	4.59486e-05	8.22679e-08	[11, 8, 20, 22, 12, 27, 18, 173, 52, 57, 108, 21, 30, 156, 56, 98, 133, 137, 10, 17, 40, 96, 102, 15, 19, 145, 26, 28, 29, 31, 33, 159, 163, 36, 37, 164, 39, 166, 42, 43, 167, 169, 46, 171, 172, 49, 176, 178, 186, 88, 89, 104, 109, 110, 124, 126]	[0, 2, 47, 9, 127, 25, 107, 1, 4, 16, 58, 67, 72, 94, 99, 101, 3, 140, 158, 32, 41, 179, 53, 54, 183, 60, 61, 70, 71, 76, 78, 85, 86, 91, 92, 93, 95, 100, 115, 193]	1	1	0	0.839482	0.0301593	1		0.91737	0.0226887	15	30	47	51	100	119	48	99	13	15	5	7	30	30	15	15	4	9	17	18	36	37	35	40	554	554	9	9	20
SYF2	ENSG00000117614.10	chr1	-	25228253	25228997	IR	TRUE	6.03025e-05	1.08712e-07	[51, 55, 50, 12, 57, 52, 53, 82, 47, 83, 59, 95]	[1, 14, 5, 8, 56, 29, 36, 75, 45, 22, 87, 88, 98]	1	1	0	0.615254	0.0694453	0.954593	0.0433232	0.790017	0.0860009	14	14	9	11	8	21	11	16	10	14	18	20	19	19	8	10	2	2	1	4	4	8	1	8	0	5	1	1	12
ARHGAP25	ENSG00000163219.12	chr2	+	68787956	68788496	IR	TRUE	6.39326e-05	1.16046e-07	[33, 66, 323, 433, 639, 313, 685, 813, 619, 1040, 688, 614, 749, 760, 781, 549, 829, 744, 753, 1014, 892, 642, 1035, 654, 788, 1056, 1058, 682, 811, 566, 822, 708, 979, 1016, 731, 990, 997, 742, 871, 873, 1005, 623, 752, 755, 1021, 766]	[114, 126, 378, 664, 648, 711, 738, 1049, 201, 110, 387, 542, 422, 502, 18, 602, 734, 491, 624, 1012]	0.993266	0.693431	0.299835	0.164737	0.0181386	0.868226	5.9251e-05	0.377057	0.113751	4	18	12	63	27	74	11	105	0	22	0	5	11	23	0	0	0	1	0	0	0	3	0	3	0	0	0	1	0
TTI1	ENSG00000101407.13	chr20	-	38002776	38006196	3AS	TRUE	6.49961e-05	1.18779e-07	[0, 1, 3, 5, 13, 29, 24, 64, 22, 71, 2, 4, 6, 9, 23, 27, 39, 109, 10, 15, 33, 38, 42, 43, 62, 63, 66, 67, 74, 90, 7, 8, 14, 19, 21, 26, 41, 45, 46, 48, 51, 55, 65, 70, 72, 76, 77, 80, 82, 83, 89, 98, 100, 103, 106, 107, 108, 110, 111, 112, 113, 117, 118, 120]	[11, 30, 97, 56, 95, 96, 40, 91, 93, 99, 31, 58, 59, 32, 34, 37, 50, 52, 54, 57, 61, 92, 104, 119]	0.261277	1	0.738723	0.38977	0.0364227	0.0278501	0.000999538	0.198984	0.059553	5	5	15	37	13	22	20	35	2	2	0	1	17	27	1	3	0	1	0	1	0	0	4	13	0	0	0	0	0
CYLD	ENSG00000083799.18	chr16	+	50784451	50786854	3AS	TRUE	6.57463e-05	1.20962e-07	[1, 5, 20, 16, 17, 39, 0, 4, 18, 65, 41, 35, 40, 43, 2, 9, 76, 10, 68, 32, 80, 28, 87, 101, 304, 30, 194, 143, 674, 122, 95, 163, 186, 11, 6, 106, 172, 178, 25, 27, 47, 86, 152, 104, 23, 46, 55, 77, 81, 137, 140, 284, 344, 29, 151, 219, 233, 399, 510, 606, 105, 193, 196, 218, 259, 292, 485, 583, 67, 69, 147, 174, 189, 278, 297, 428, 568, 611, 36, 74, 98, 108, 148, 157, 168, 198, 206, 221, 415, 42…	[13, 102, 489, 211, 517, 424, 319, 15, 670, 563, 716, 770, 369, 413, 496, 767, 33, 682, 735, 375, 460, 595, 648, 753, 902, 486, 8, 531, 49, 565, 149, 676, 680, 686, 736, 781, 807, 817, 829, 832, 899, 906, 402, 431, 505, 513, 555, 45, 562, 52, 78, 79, 592, 603, 94, 114, 131, 134, 160, 684, 687, 177, 696, 698, 705, 707, 711, 726, 727, 730, 740, 745, 746, 747, 748, 755, 761, 779, 783, 790, 793, 794,…	0.150752	0.713924	0.563172	0.0953485	0.0050592	0.0164457	6.36011e-05	0.0565557	0.0033908	12	160	9	216	14	380	29	134	10	172	3	174	7	222	1	72	0	19	25	148	16	145	67	360	0	0	3	20	6
ERGIC3	ENSG00000125991.20	chr20	+	35556271	35556972	3AS	FALSE	6.58683e-05	1.21999e-07	[0, 24, 26, 22, 6, 11, 56, 7, 10, 44, 61, 66, 15, 23, 38, 40, 43, 49, 50, 52, 62, 65, 69, 72, 75, 78, 80, 82, 83, 86, 89, 95, 98, 102, 103, 106, 107, 109]	[9, 33, 99, 21, 68, 101, 70, 71, 91, 60, 92, 84, 87, 90, 59, 28, 94]	0.0279653	0.0935252	0.0655599	0.20403	0.0142827	0.0172882	0.000199473	0.11527	0.0179583	6	21	6	30	3	17	7	22	11	48	1	52	0	60	15	78	8	18	14	31	7	38	5	23	0	0	11	24	7
YWHAB	ENSG00000166913.13	chr20	+	44901833	44903035	IR	FALSE	7.01236e-05	1.30747e-07	[33, 38, 70, 73, 44, 43, 156, 234, 237, 39, 359, 294, 83, 348, 221, 257, 49, 226, 230, 262, 55, 187, 365, 259, 148, 176, 316, 327, 346, 225, 357, 360, 361, 370, 371, 246, 251]	[34, 42, 16, 36, 69, 67, 52, 77, 82, 18, 2, 108, 116, 30, 71, 134, 236, 125, 181, 50, 184, 117, 208, 213, 214, 106, 235, 284, 292, 86, 133, 138, 270, 146, 278, 152, 154, 158, 286, 40, 170, 303, 53, 312, 314, 189, 63, 191, 209, 211, 337, 216, 220, 355, 100, 363, 368, 254]	0.938983	0.8692	0.0697827	0.355227	0.0460654	0.819654	0.0217694	0.555806	0.0884634	17	64	69	154	152	212	56	151	28	95	54	89	75	88	4	18	7	20	1	42	15	30	6	43	0	0	0	9	12
STIM1	ENSG00000167323.11	chr11	+	4082982	4083262	3AS	TRUE	7.37652e-05	1.38448e-07	[1, 17, 42, 113, 57, 50, 75, 62, 28, 67, 58, 5, 11, 74, 110, 147, 30, 105, 111, 118, 0, 13, 14, 27, 41, 112, 119, 122, 140, 4, 9, 15, 37, 53, 65, 80, 83, 102, 131, 148, 156, 6, 7, 8, 16, 19, 21, 26, 31, 34, 35, 38, 44, 45, 46, 51, 59, 66, 68, 69, 72, 77, 78, 79, 81, 88, 89, 90, 95, 96, 100, 104, 115, 117, 121, 123, 124, 126, 127, 128, 129, 130, 141, 143, 149, 150, 151, 158, 159, 160]	[22, 47, 32, 64, 137, 48, 145, 25, 97, 98, 36, 39, 136, 138, 146, 49, 20, 23]	0.330292	0.326923	0.00336889	0.2341	0.0105958	0.00727762	0.000103526	0.100981	0.0230132	0	0	5	16	2	13	7	18	0	0	0	0	0	23	0	0	0	0	0	3	0	1	10	18	0	0	4	16	0
ECT2	ENSG00000114346.14	chr3	+	172761683	172762415	3AS	TRUE	7.51566e-05	1.41987e-07	[0, 25, 8, 1, 49, 17, 6, 3, 5, 11, 19, 70, 24, 96, 150, 47, 95, 155, 53, 38, 55, 18, 145, 203, 249, 289, 9, 16, 20, 33, 102, 128, 143, 148, 167, 172, 205, 223, 246, 267, 290, 12, 22, 31, 34, 57, 77, 78, 104, 116, 121, 131, 133, 136, 151, 153, 160, 180, 192, 202, 213, 233, 240, 242, 243, 262, 272, 2, 10, 13, 14, 15, 21, 26, 27, 28, 29, 30, 32, 35, 36, 37, 42, 45, 59, 72, 73, 75, 82, 83, 85, 88, 97…	[4, 41, 68, 80, 60, 51, 111, 39, 124, 50, 52, 156, 74, 109, 43, 44, 56, 61, 193, 69, 204, 86, 108, 112, 248, 137, 138, 141, 159, 40, 46, 48, 54, 58, 63, 64, 65, 191, 196, 81, 211, 84, 87, 89, 90, 91, 217, 226, 229, 234, 235, 115, 117, 125, 119, 250, 251, 253, 126]	0.104487	0.123779	0.0192913	0.207913	0.0300007	0.00697979	1.94581e-07	0.111053	0.0254012	6	19	0	10	5	15	0	8	2	4	0	9	0	8	0	0	6	30	8	54	0	1	8	69	0	0	3	4	0
THADA	ENSG00000115970.18	chr2	-	43592416	43595930	3AS	TRUE	7.79397e-05	1.48207e-07	[0, 32, 21, 155, 43, 33, 123, 24, 52, 4, 217, 7, 10, 197, 19, 35, 88, 51, 307, 34, 102, 379, 66, 181, 250, 29, 48, 179, 352, 355, 8, 38, 73, 86, 116, 200, 220, 231, 243, 275, 290, 315, 341, 356, 388, 436, 26, 31, 41, 71, 76, 78, 111, 117, 126, 128, 131, 133, 186, 193, 202, 218, 222, 246, 256, 267, 273, 274, 299, 311, 317, 334, 343, 346, 362, 377, 394, 403, 438, 446, 2, 11, 16, 20, 37, 44, 46, 50,…	[93, 64, 91, 397, 349, 364, 109, 390, 398, 18, 418, 318, 338, 360, 391, 268, 411, 420, 437, 65, 321, 322, 77, 339, 344, 90, 348, 363, 114, 375]	0.226504	0.17284	0.0536643	0.19813	0.0225491	0.00486101	2.51773e-07	0.108456	0.0268113	6	20	10	40	11	53	4	28	6	16	0	5	0	18	1	1	5	8	6	8	1	2	0	10	0	0	1	3	2
ZNF671	ENSG00000083814.13	chr19	-	57722422	57723213	3AS	FALSE	8.41752e-05	1.61104e-07	[7, 39, 43, 45, 18, 55, 40, 42, 47, 50, 51, 58]	[0, 2, 6, 13, 11, 27, 14, 37, 15, 16, 17, 19, 56, 10, 22, 23, 24, 26, 28, 29, 31, 34, 36, 44, 53, 54, 60, 61]	0.918605	0.121577	0.797027	0.843263	0.00586778	0.988297	9.32614e-07	0.917031	0.00921944	16	18	14	17	36	51	45	62	24	30	43	47	53	60	17	23	5	6	4	7	5	5	18	18	0	0	8	10	8
HECTD2	ENSG00000165338.17	chr10	+	91484655	91485179	3AS	TRUE	9.15966e-05	1.76439e-07	[0, 15, 2, 25, 24, 39, 38, 6, 30, 47, 55, 3, 5, 19, 20, 31, 41, 43, 46, 48, 56, 12, 17, 18, 21, 23, 26, 28, 32, 36, 40, 42, 45, 49, 50, 54, 58, 59, 61, 64, 67, 72, 82, 83, 84, 87, 88, 91, 92]	[7, 70, 79, 10, 66, 71, 14, 35, 57, 62, 63, 65, 68, 69, 77, 80, 81, 94, 95, 97]	0.631818	0.581395	0.0504228	0.437926	0.015073	0.0178528	8.60927e-07	0.232601	0.0638096	3	7	10	22	5	12	5	11	0	3	2	10	1	11	1	1	0	0	0	0	0	0	3	3	0	0	0	0	0
ORAI2	ENSG00000160991.16	chr7	+	102433661	102436224	3AS	FALSE	9.21408e-05	1.78625e-07	[0, 20, 5, 32, 13, 23, 26, 27, 28, 31]	[4, 8, 37, 21, 38, 9, 7, 10, 40, 17]	0.994898	0.293478	0.70142	0.637521	0.000209021	0.123597	1.58468e-05	0.361926	0.063559	1	1	0	0	0	0	0	0	0	0	0	0	0	1	1	2	0	0	1	1	0	0	0	0	0	0	15	21	0
SETD4	ENSG00000185917.14	chr21	-	36043956	36045581	3AS	TRUE	9.29129e-05	1.81269e-07	[2, 16, 3, 8, 9, 29, 22, 7, 10, 11, 13, 17, 132, 46, 120, 6, 12, 20, 51, 105, 128, 150, 15, 21, 41, 85, 110, 117, 152, 1, 23, 24, 36, 37, 42, 52, 64, 91, 96, 98, 104, 116, 118, 125, 126, 130, 135, 146, 159, 172, 174, 178, 179, 188, 0, 4, 14, 18, 26, 28, 33, 39, 40, 45, 49, 50, 53, 57, 58, 60, 61, 63, 65, 68, 71, 77, 80, 81, 83, 84, 87, 88, 94, 95, 97, 100, 102, 106, 108, 112, 113, 115, 119, 121, …	[145, 44, 151, 156, 43, 122, 134, 138, 144, 32, 171, 55, 78, 136, 139, 140, 141, 142, 147, 148, 149, 30, 31, 35, 163, 165, 168, 48, 176, 56, 73, 74, 76, 82, 86]	0.635097	0.946429	0.311331	0.233449	0.00382924	0.00553123	5.26306e-07	0.120231	0.0228073	3	5	7	13	6	21	9	37	0	6	1	12	2	20	3	5	0	2	0	1	1	2	1	6	0	0	1	1	0
TFRC	ENSG00000072274.13	chr3	-	196072152	196077063	3AS	TRUE	9.34769e-05	1.83523e-07	[38, 195, 1257, 1099, 563, 965, 643, 309, 832, 398, 1557, 1080, 577, 94, 608, 612, 1397, 7, 1032, 1415, 1544, 657, 146, 530, 21, 1429, 792, 671, 808, 312, 1464, 829, 1341, 322, 705, 1093, 1479, 329, 721, 350, 616, 749, 626, 1396, 890, 252]	[138, 148, 245, 125, 785, 172, 166, 877, 774, 884, 953, 1079, 595, 804, 326, 852, 492, 1035, 580, 584, 614, 627, 163, 164, 1196, 1245, 226, 802, 1342, 1374, 1432, 924, 1444, 964, 1030, 1549, 1056, 1591, 583, 1118, 1138, 630, 1154, 1158, 649, 652, 1182, 187, 1218, 1219, 1246, 1249, 1268, 1274, 1276, 1290, 794, 1317, 1318, 302, 1336, 313, 325, 1356, 1359, 346, 879, 370, 882, 891, 1409, 1425, 1436, …	0.998069	0.990881	0.00718804	0.4556	0.0308025	0.069405	0.0166313	0.283773	0.0555703	4	15	4	27	7	18	2	10	5	8	2	8	0	4	0	2	23	40	26	29	3	5	18	26	0	0	2	2	7
HELLS	ENSG00000119969.15	chr10	+	94545907	94546376	3AS	TRUE	9.56227e-05	1.88917e-07	[2, 6, 131, 33, 73, 7, 137, 18, 62, 103, 117, 8, 32, 168, 52, 72, 92, 118, 129, 132, 136, 139, 13, 14, 19, 146, 153, 36, 45, 46, 50, 53, 181, 182, 56, 187, 64, 65, 74, 91, 93, 95, 96, 98, 107, 125, 190, 192, 194, 195, 196, 198]	[15, 88, 35, 90, 105, 22, 149, 162, 164, 167, 40, 169, 75, 172, 148, 20, 122]	0.0891365	0.170455	0.0813181	0.275938	0.0015227	0.0131483	0.00216843	0.144501	0.0257967	0	8	1	3	0	8	0	1	2	7	2	7	0	2	0	0	5	11	5	8	0	0	4	8	0	3	0	0	1
MYL4	ENSG00000198336.9	chr17	+	47223057	47223508	3AS	TRUE	0.000101053	2.00892e-07	[2, 0, 8, 21, 18, 34, 33, 35, 36, 10, 43, 45, 46, 24, 26]	[13, 11, 37, 40, 12, 3, 41, 44, 38, 39, 42, 49, 22, 25, 28, 31]	0.0963855	0.188235	0.0918498	0.47638	3.62532e-05	0.0603102	1.36578e-05	0.304962	0.0400188	0	0	0	0	0	0	0	0	0	0	0	0	0	0	0	0	1	1	3	4	0	2	13	19	1	1	18	35	6
ZNF548	ENSG00000188785.12	chr19	+	57398412	57401667	ALJ	TRUE	0.000112264	2.24567e-07	[1, 3, 0, 13, 9, 12, 17, 27, 42, 37, 53, 38, 46, 10, 19, 39, 65, 31, 35, 41, 36, 45, 62, 74, 24, 26, 28, 40, 43, 50, 52, 56, 6, 11, 14, 18, 20, 23, 25, 29, 30, 32, 33, 34, 44, 47, 48, 49, 54, 55, 57, 58, 59, 60, 61, 63, 64, 66, 67, 68, 69, 71, 73, 75, 76, 78, 79, 82, 83, 84]	[2, 15, 5, 7, 21, 4, 77, 16, 80, 81, 51, 22]	0.161842	0.0701754	0.0916667	0.334912	0.0616757	0.0241721	0.00263751	0.176818	0.0574339	26	35	1	58	7	108	6	45	23	80	0	39	0	41	1	6	0	7	9	15	7	24	14	35	0	0	2	4	6
PRPF38B	ENSG00000134186.12	chr1	+	108692867	108693589	3AS	TRUE	0.000114748	2.30953e-07	[6, 39, 7, 11, 114, 83, 65, 4, 50, 111, 185, 22, 12, 162, 180, 38, 51, 52, 203, 122, 158, 29, 41, 187, 164, 115, 127, 5, 181, 14, 28, 67, 217, 223, 281, 364, 183, 191, 229, 320, 326, 392, 10, 20, 21, 60, 103, 120, 131, 168, 186, 202, 252, 270, 306, 77, 91, 93, 94, 96, 98, 157, 173, 201, 205, 211, 212, 213, 219, 220, 224, 243, 248, 254, 258, 265, 287, 288, 316, 350, 351, 352, 354, 370, 381, 389, 4…	[33, 171, 95, 165, 66, 90, 299, 302, 318, 226, 393, 269, 335, 134, 190, 218, 227, 278, 314, 329, 147, 300, 305, 323, 42, 57, 71, 76, 116, 121, 244, 293, 295, 298, 301, 304, 307, 313, 401, 81, 117, 137, 142, 167, 170, 172, 174, 198, 199, 206, 216, 235, 257, 264, 273, 274, 275, 280, 284, 296, 297, 311, 324, 325, 332, 334, 337, 345, 347, 359, 360, 369, 378, 380, 384, 402, 405, 407, 408, 409]	0.951297	0.991935	0.0406385	0.182521	0.00342874	0.0460543	0.000531104	0.11548	0.00668589	2	23	29	85	31	178	48	173	2	20	0	27	11	78	1	9	3	11	4	22	1	10	5	41	0	0	3	4	1
NAA16	ENSG00000172766.19	chr13	+	41373780	41374741	5AS	FALSE	0.000125663	2.56018e-07	[1, 3, 5, 15, 24, 14, 2, 80, 16, 61, 74, 48, 295, 138, 78, 122, 172, 10, 55, 108, 135, 184, 296, 7, 23, 26, 77, 114, 115, 119, 127, 166, 329, 389, 17, 25, 47, 66, 87, 91, 96, 109, 117, 121, 124, 132, 142, 144, 145, 156, 160, 176, 191, 203, 322, 327, 381, 12, 34, 35, 37, 38, 42, 83, 120, 129, 130, 151, 167, 193, 194, 198, 234, 269, 273, 276, 279, 280, 288, 304, 321, 328, 330, 336, 345, 351, 365, 3…	[31, 67, 36, 189, 233, 21, 54, 68, 33, 340, 347, 224, 226, 136, 409, 182, 59, 62, 319, 326, 216, 346, 223, 229, 236, 247, 250, 264, 265, 18, 20, 22, 27, 30, 185, 57, 320, 323, 72, 205, 207, 339, 342, 344, 219, 353, 227, 359, 104, 232, 240, 243, 246]	0.608646	1	0.391354	0.239419	0.0172247	0.038271	0.000275336	0.137043	0.0168595	4	14	18	37	16	56	18	28	3	11	1	15	10	51	1	6	3	8	3	22	0	4	16	36	0	0	0	0	1
NUP88	ENSG00000108559.12	chr17	-	5387069	5387385	IR	TRUE	0.000125663	2.56024e-07	[34, 278, 63, 640, 131, 561, 279, 567, 452, 251, 637, 668, 564, 565, 4, 656, 559, 705, 714, 621, 632, 119, 641, 650, 652, 655, 149, 284, 157, 669, 670, 679, 40, 680, 681, 873, 560, 563, 55, 573, 702, 704, 706, 579, 709, 582, 845, 719, 723, 598, 727, 608, 228, 615, 631, 105, 635, 745, 236, 109, 620, 622, 623, 627, 628, 630, 120]	[50, 22, 294, 390, 299, 190, 84, 237, 282, 175, 289, 797, 809, 300, 335, 527, 159, 172, 182, 514, 5, 59, 188, 798, 376, 26, 568, 599, 603, 132, 665, 673, 229, 245, 280, 372, 382, 407, 447, 453, 515, 525, 25, 27, 549, 554, 562, 583, 600, 604, 605, 609, 612, 636, 152, 667, 677, 689, 179, 693, 696, 195, 203, 204, 205, 716, 718, 213, 214, 219, 220, 221, 738, 740, 230, 765, 767, 768, 269, 270, 785, 78…	1	0.996835	0.00316456	0.480634	0.0347219	0.942619	0.0105515	0.710575	0.0778707	3	22	26	38	10	39	28	55	6	19	4	5	10	12	13	19	0	0	0	0	1	2	0	0	0	0	0	0	2
DYNC1I2	ENSG00000077380.16	chr2	+	171728418	171728702	IR	TRUE	0.00012853	2.63452e-07	[85, 68, 74, 38, 131, 41, 249, 251, 108, 253, 257, 269, 234, 275, 148, 149, 172, 301, 183, 223, 228, 239, 115, 247, 254, 258, 260, 261, 135, 276, 279, 24, 155, 288, 39, 40, 167, 297, 185, 323, 324, 329, 331, 335, 337, 340, 344, 220, 350, 95, 231, 232, 235, 236, 363, 242, 243, 245, 248, 255, 365, 370]	[59, 112, 207, 60, 126, 51, 96, 105, 110, 123, 138, 206, 342, 84, 91, 101, 109, 121, 140, 144, 166, 168, 176, 187, 46, 52, 54, 56, 57, 66, 76, 80, 81, 87, 92, 106, 107, 111, 113, 117, 132, 134, 137, 139, 142, 146, 147, 153, 158, 162, 163, 173, 175, 186, 188, 191, 193, 194, 196, 197, 200, 201, 202, 203, 209, 210, 212, 214, 219, 221, 227, 233, 240, 262, 280, 281, 283, 284, 285, 291, 293, 294, 295]	1	0.97037	0.0296296	0.19153	0.029821	0.746351	3.68664e-05	0.395658	0.080191	2	18	2	11	5	46	0	14	2	18	7	10	10	17	0	4	0	3	0	0	0	1	0	4	0	0	0	0	0
FAM122B	ENSG00000156504.16	chrX	-	134796256	134797120	IR	TRUE	0.000139394	2.87442e-07	[82, 52, 77, 115, 79, 224, 112, 121, 76, 125, 103, 234, 117, 296, 107, 275, 278, 164, 300, 303, 304, 81]	[9, 13, 12, 0, 15, 2, 5, 44, 11, 21, 30, 50, 48, 68, 26, 60, 72, 74, 97, 24, 31, 35, 47, 137, 155, 158, 172, 182, 189, 203, 208, 219, 225, 250, 277, 284, 285, 39, 40, 45, 46, 54, 58, 62, 63, 67, 70, 73, 88, 89, 93, 95, 98, 99, 100, 104, 111, 114, 122, 123, 126, 127, 128, 129, 131, 134, 135, 136, 138, 145, 152, 153, 159, 161, 163, 166, 167, 169, 175, 185, 204, 211, 214, 217, 218, 228, 229, 237, 24…	0.0140845	0.0364716	0.0223871	0.60718	0.0731256	0.988581	3.59123e-05	0.780547	0.0754476	11	27	20	26	19	28	24	33	6	14	5	5	13	17	3	4	0	1	1	3	0	0	8	19	1	1	3	3	0
PPM1M	ENSG00000164088.18	chr3	+	52249669	52250594	ALJ	FALSE	0.000140251	2.90941e-07	[15, 8, 10, 13, 6, 59, 5, 28, 33, 23, 29, 35, 31, 60, 70, 78, 32, 43, 45, 49, 50, 51, 66, 68, 69, 71, 79, 84, 91, 95, 1, 2, 3, 9, 16, 17, 18, 22, 34, 36, 38, 39, 40, 46, 47, 52, 53, 54, 55, 56, 57, 58, 62, 64, 65, 67, 72, 73, 75, 81, 83, 85, 86, 87, 88, 89, 90, 92, 93, 94, 96, 97, 98, 99, 100, 101, 102, 103]	[0, 14, 37, 4, 11, 41, 24, 63, 20, 26, 48, 74, 7, 19, 21, 25, 27, 30, 42, 44, 61, 76, 77, 80, 82, 104]	0.490385	0.0781991	0.412186	0.411466	0.000152911	0.744215	5.55477e-05	0.601052	0.0228248	1	1	4	8	5	6	10	27	1	1	0	0	7	15	0	3	2	2	4	7	1	7	0	3	0	0	6	14	0
PPP4R3B	ENSG00000275052.5	chr2	-	55574401	55577314	3AS	TRUE	0.000142662	2.99465e-07	[1, 2, 191, 199, 46, 186, 60, 119, 201, 528, 170, 189, 194, 237, 47, 193, 195, 270, 380, 200, 238, 241, 247, 406, 37, 559, 156, 185, 209, 245, 246, 269, 271, 328, 336, 354, 395, 399, 402, 433, 506, 525, 15, 22, 540, 542, 543, 544, 545, 548, 550, 79, 109, 139, 148, 152, 160, 172, 180, 231, 235, 240, 242, 249, 275, 279, 282, 286, 287, 307, 314, 319, 321, 323, 326, 327, 330, 342, 358, 360, 363, 381,…	[50, 66, 344, 117, 220, 322, 138, 303, 431, 491, 132, 385, 392, 343, 357, 373, 387, 514, 563, 564, 128, 340, 359, 400, 409, 420, 421, 469, 503, 513, 515, 516, 517, 518, 519, 523, 529, 530, 533, 536, 537, 539, 549, 551, 48, 562, 52, 53, 72, 103, 130, 135, 248, 250, 276, 329, 335, 338, 339, 341, 353, 386, 389, 391, 396, 404, 411, 416, 423, 426, 427, 432, 449, 450, 471, 492, 501, 507]	0.505119	0.425703	0.0794166	0.587214	0.0181551	0.158518	3.53033e-05	0.388895	0.0611885	13	19	37	57	38	55	28	45	17	19	13	27	3	8	0	0	3	5	6	8	0	4	17	22	0	0	1	1	1
DZIP3	ENSG00000198919.13	chr3	+	108684341	108686444	3AS	TRUE	0.000142662	2.98604e-07	[4, 19, 66, 5, 11, 94, 2, 28, 54, 55, 16, 22, 37, 74, 176, 23, 84, 8, 31, 105, 133, 7, 17, 18, 80, 93, 119, 123, 145, 160, 207, 224, 15, 24, 26, 27, 72, 83, 88, 96, 97, 111, 121, 124, 128, 129, 143, 150, 153, 166, 222, 223, 1, 6, 10, 12, 14, 21, 29, 30, 32, 33, 39, 47, 51, 58, 59, 64, 68, 73, 76, 77, 79, 81, 85, 86, 87, 89, 91, 92, 95, 99, 102, 103, 104, 108, 110, 112, 113, 114, 115, 116, 117, 11…	[63, 38, 171, 174, 167, 41, 44, 109, 175, 67, 60, 71, 219, 221, 130, 144, 34, 35, 168, 42, 43, 173, 48, 49, 50, 178, 53, 180, 183, 56, 184, 186, 61, 62, 65, 194, 195, 196, 217, 90, 226, 100, 106, 230, 234]	0.156213	1	0.843787	0.264087	0.0132349	0.0374213	0.00038756	0.13539	0.0187211	5	19	19	47	18	64	9	20	6	25	3	57	4	10	0	6	0	2	0	0	0	2	0	3	0	0	0	0	0
MYCBP	ENSG00000214114.9	chr1	-	38866999	38873017	3AS	FALSE	0.000180447	3.8101e-07	[3, 6]	[0, 9, 2, 8, 18, 10, 16, 11, 19, 12, 13, 15, 22, 25, 27]	0.0410959	0.0893561	0.0482602	0.858242	0.0017228	0.981517	5.51588e-07	0.919823	0.00526657	12	15	7	8	14	15	9	11	17	17	15	15	21	24	24	24	4	4	16	18	13	14	2	3	10	12	2	3	31
ZC3H11A	ENSG00000058673.17	chr1	+	203801639	203802568	IR	TRUE	0.000184639	3.93271e-07	[100, 102, 113, 266, 167, 718, 237, 145, 547, 548, 695, 258, 131, 274, 150, 541, 294, 295, 298, 316, 89, 483, 238, 247, 637]	[7, 4, 0, 23, 59, 46, 72, 202, 99, 25, 53, 57, 115, 527, 129, 219, 2, 42, 314, 248, 259, 563, 183, 216, 267, 17, 93, 105, 189, 203, 205, 292, 304, 523, 526, 51, 114, 215, 425, 438, 452, 454, 75, 649, 146, 320, 367, 369, 392, 420, 446, 448, 450, 512, 516, 519, 12, 524, 532, 538, 540, 551, 552, 556, 50, 566, 569, 66, 87, 603, 613, 110, 642, 136, 648, 142, 663, 170, 180, 184, 190, 705, 729, 222, 242…	1	0.504582	0.495418	0.789363	0.0291289	0.993161	3.96523e-07	0.894084	0.0260248	38	38	104	115	86	91	28	31	5	5	19	21	39	44	0	0	4	6	1	1	1	1	1	8	0	0	0	0	1
LINC01138	ENSG00000274020.4	chr1	-	148432958	148433643	ALJ	TRUE	0.000184639	3.9442e-07	[7, 15, 0, 25, 33, 32, 8, 24, 54, 19, 26, 28, 40, 59, 6, 21, 37, 46, 63, 1, 4, 5, 14, 16, 17, 18, 20, 23, 27, 29, 30, 31, 34, 35, 36, 38, 39, 41, 42, 44, 47, 49, 50, 51, 53, 55, 56, 57, 60, 62, 64, 66, 69, 71, 72, 73, 74, 75, 76]	[11, 10, 70, 43, 48, 9, 68, 45, 52, 61]	0.964497	1	0.035503	0.330432	0.000104667	0.0639296	0.0407082	0.203019	0.034638	1	1	2	11	1	6	4	9	0	2	1	4	3	8	5	10	0	0	2	4	2	4	0	0	0	2	0	3	1
DLST	ENSG00000119689.15	chr14	+	74889349	74889877	IR	TRUE	0.00018796	4.05369e-07	[15, 14, 23, 24, 18, 153, 114, 141, 154, 31, 108, 122, 21, 156, 56, 155, 158, 34, 167, 169, 49, 113, 116, 124, 145, 19, 22, 26, 27, 28, 161, 40, 51, 55, 58, 61, 62, 96, 107, 109, 110, 117, 126, 127]	[50, 1, 129, 3, 87, 59, 99, 132, 39, 82, 83, 86, 125]	0.662879	0.972973	0.310094	0.0434146	0.00338223	0.716269	0.0769754	0.261796	0.11418	0	5	1	25	0	26	1	5	0	7	0	0	4	10	0	3	0	3	0	25	0	0	0	15	0	0	0	7	0
UBXN2A	ENSG00000173960.14	chr2	+	23984831	23999671	3AS	TRUE	0.00018796	4.06157e-07	[3, 1, 20, 0, 63, 40, 42, 53, 47, 22, 13, 30, 17, 21, 50, 82, 5, 31, 59, 75, 104, 55, 65, 71, 73, 79, 80, 100, 101, 2, 4, 10, 15, 16, 18, 24, 27, 32, 33, 35, 38, 39, 41, 44, 45, 46, 48, 52, 54, 56, 62, 64, 66, 67, 68, 70, 76, 77, 78, 83, 88, 90, 92, 93, 95, 97, 99, 103, 105, 106, 107, 109, 110, 112, 115, 119, 120, 122, 125, 126]	[19, 74, 14, 114, 89, 128, 129, 91, 12, 113, 85, 86, 117, 123, 28, 94, 127]	0.413725	0.3	0.113725	0.156731	0.00638633	0.00415718	3.42664e-05	0.0789604	0.0109574	1	9	1	8	0	11	3	15	6	27	0	28	0	14	2	9	1	3	1	15	2	11	5	17	0	1	0	2	2
FIG4	ENSG00000112367.12	chr6	+	109825087	109825425	ALJ	TRUE	0.000213064	4.63034e-07	[4, 0, 88, 42, 35, 110, 141, 45, 91, 573, 551, 130, 23, 73, 85, 213, 343, 470, 14, 32, 47, 178, 200, 243, 283, 21, 267, 515, 80, 171, 229, 444, 530, 536, 650, 64, 108, 197, 207, 234, 298, 375, 524, 543, 550, 557, 576, 592, 677, 752, 766, 34, 40, 57, 62, 176, 193, 196, 202, 233, 265, 278, 285, 293, 341, 364, 418, 423, 438, 468, 480, 484, 508, 529, 541, 542, 546, 572, 596, 611, 614, 626, 639, 694, …	[1, 28, 12, 22, 33, 39, 66, 89, 310, 100, 8, 10, 43, 26, 50, 93, 7, 398, 253, 37, 117, 48, 9, 69, 86, 517, 58, 54, 55, 72, 60, 102, 19, 38, 68, 104, 194, 289, 67, 118, 331, 92, 49, 52, 111, 169, 254, 406, 487, 581, 13, 96, 106, 107, 122, 134, 206, 248, 306, 388, 392, 431, 463, 476, 479, 507, 512, 535, 548, 595, 30, 44, 53, 82, 103, 144, 148, 170, 223, 238, 276, 292, 323, 381, 523, 544, 579, 24, 3…	0.439678	0.240726	0.198953	0.73254	0.0155955	0.90414	0.000309958	0.818256	0.0130041	165	199	242	335	486	612	261	368	282	327	472	510	329	387	73	90	28	34	5	8	46	52	0	5	0	3	2	5	12
DLST	ENSG00000119689.15	chr14	+	74882016	74885585	ES	FALSE	0.000219354	4.79413e-07	[15, 8, 2, 63, 31, 100, 122, 21, 41, 3, 49, 19, 40, 55, 82, 89, 93, 99, 112, 126]	[0, 4, 14, 11, 65, 24, 50, 52, 45, 153, 1, 137, 138, 33, 75, 36, 68, 94, 25, 42, 56, 70, 111, 134, 16, 34, 59, 71, 78, 87, 115, 116, 143, 150, 169, 5, 6, 10, 20, 22, 27, 28, 30, 38, 39, 43, 48, 51, 57, 61, 62, 64, 66, 67, 69, 73, 81, 86, 88, 90, 91, 92, 95, 96, 98, 101, 107, 110, 117, 119, 125, 131, 132, 135, 140, 144, 145, 146, 147, 148, 149, 152, 159, 160, 162, 165, 168, 173, 174]	0.335821	0.240154	0.0956665	0.775047	0.0281941	0.964953	4.43197e-05	0.870542	0.0184796	1	5	27	36	18	29	8	8	3	5	2	2	55	59	1	4	3	4	41	45	1	1	18	18	0	0	11	12	1
RPL4	ENSG00000174444.15	chr15	-	66500193	66500292	IR	TRUE	0.000220039	4.83626e-07	[54, 309, 315, 320, 464, 278, 37, 70, 327, 306, 307, 277, 280]	[1, 9, 114, 101, 119, 255, 137, 62, 7, 13, 143, 60, 107, 207, 295, 174, 192, 103, 179, 56, 186, 89, 90, 117, 253, 139, 147, 164, 296, 321, 219, 99, 267, 268, 145, 287, 170, 49, 189, 104, 125, 270, 276, 30, 159, 414, 290, 300, 47, 433, 180, 308, 184, 313, 318, 322, 448, 68, 200, 79, 209, 352, 100, 235, 236, 115, 252]	1	0.621429	0.378571	0.808469	0.0197471	1		0.900713	0.020983	18	24	20	20	36	38	8	15	16	27	7	8	21	21	12	15	1	1	0	0	0	0	6	7	3	3	0	0	8
TMX3	ENSG00000166479.10	chr18	-	68687765	68689947	ES	TRUE	0.000227694	5.03815e-07	[129, 15, 132, 166, 64, 164, 190, 237, 110, 157, 205, 230, 539, 294, 322, 201, 207, 382, 523, 280, 546, 291, 295, 308, 310, 312, 313, 216, 356, 121, 133, 519, 137, 268, 269, 526, 271, 532, 281, 282, 413, 541, 551, 298, 299, 555, 559, 432, 561, 562, 182, 314, 566, 444, 569, 318, 321, 326, 329, 330, 460, 208, 217, 349, 481, 488, 233, 490, 107, 244, 245, 502, 247, 123, 605]	[6, 77, 10, 293, 65, 341, 380, 202, 377, 407, 128, 379, 31, 50, 53, 192, 206, 367, 389, 514, 35, 554, 41, 130, 150, 186, 198, 215, 223, 229, 315, 319, 388, 392, 470, 520, 524, 525, 25, 540, 542, 544, 32, 550, 552, 553, 557, 560, 563, 51, 567, 63, 81, 90, 136, 210, 212, 218, 220, 231, 232, 289, 325, 327, 328, 342, 363, 364, 387, 390, 391, 393, 400, 401, 403, 406, 416, 417, 418, 419, 423, 447, 449,…	1	1	0	0.690723	0.0392448	0.291542	4.03189e-05	0.527191	0.0579111	7	12	37	41	35	50	21	22	20	26	19	29	37	40	4	4	3	7	0	0	2	2	2	5	0	0	0	0	3
GPCPD1	ENSG00000125772.14	chr20	-	5575525	5575815	IR	TRUE	0.000227694	5.06074e-07	[114, 261, 424, 658, 31, 41, 706, 756, 329, 526, 724, 1606, 106, 702, 728, 826, 325, 1362, 380, 1457, 1057, 1646, 632, 1672, 1683, 687, 1714, 1721, 1241, 276, 788, 812, 828, 845, 1390, 1427, 1455, 1513, 1537, 1056, 35, 1579, 44, 1068, 1069, 1582, 1601, 1603, 1099, 617, 1133, 1654, 1673, 1164, 1195, 1198, 690, 1716, 1205, 1217, 707, 1730, 1733, 1225, 1743, 1238, 739, 740, 1766, 1255, 1256, 1776, 1…	[64, 29, 101, 118, 93, 115, 171, 138, 203, 176, 21, 123, 4, 202, 403, 11, 196, 240, 211, 154, 162, 126, 125, 141, 144, 660, 164, 210, 225, 369, 134, 181, 227, 269, 797, 292, 301, 370, 389, 146, 149, 353, 104, 148, 167, 186, 701, 204, 221, 391, 543, 1100, 143, 656, 161, 183, 188, 710, 207, 794, 798, 823, 314, 321, 335, 338, 352, 398, 930, 425, 515, 537, 565, 601, 92, 108, 620, 624, 127, 130, 131, …	0.993377	1	0.00662252	0.610571	0.063526	0.967039	0.000506977	0.755111	0.0604836	31	41	181	187	215	278	85	121	37	54	49	51	70	71	6	7	7	15	6	8	6	11	7	24	0	0	0	4	7
SYVN1	ENSG00000162298.19	chr11	-	65133252	65133469	3AS	TRUE	0.000243407	5.47009e-07	[2, 0, 34, 7, 19, 4, 27, 62, 79, 86, 11, 98, 99, 150, 10, 44, 87, 128, 133, 141, 166, 18, 41, 49, 139, 149, 177, 1, 5, 13, 32, 40, 45, 48, 55, 61, 74, 97, 103, 117, 136, 144, 145, 146, 147, 152, 174, 190, 191, 192, 196, 198, 3, 6, 8, 9, 12, 14, 15, 16, 17, 20, 22, 25, 28, 29, 31, 33, 35, 39, 46, 52, 56, 57, 60, 64, 65, 66, 68, 69, 70, 71, 75, 80, 83, 84, 85, 90, 105, 107, 108, 109, 115, 116, 121,…	[193, 72, 129, 36, 179, 122, 135, 24, 26, 37, 38, 178, 180, 188, 197, 78, 81, 88, 92, 93, 94, 126, 247]	0.197977	1	0.802023	0.154485	5.52649e-05	0.00867484	0.000281832	0.0901294	0.0133312	0	0	0	1	2	2	0	4	0	0	0	0	1	4	0	0	0	0	4	10	0	0	1	4	0	0	2	20	0
KANSL3	ENSG00000114982.19	chr2	-	96619762	96631311	3AS	TRUE	0.000243407	5.46291e-07	[1, 13, 9, 35, 71, 218, 10, 178, 84, 87, 142, 179, 204, 221, 11, 14, 20, 24, 29, 30, 32, 75, 104, 105, 133, 137, 140, 162, 181, 198, 213, 216, 220, 0, 2, 6, 7, 8, 12, 26, 28, 31, 38, 41, 43, 44, 45, 48, 50, 54, 55, 60, 63, 73, 76, 86, 88, 90, 94, 96, 102, 106, 109, 110, 116, 127, 128, 129, 134, 135, 136, 138, 139, 143, 145, 146, 147, 149, 151, 152, 154, 155, 156, 158, 164, 165, 166, 172, 175, 180…	[58, 67, 65, 99, 228, 125, 157, 62, 78, 227, 107, 111, 112, 115, 123, 150, 153, 159, 160, 161, 163, 168, 170, 174, 61, 66, 68, 199, 77, 80, 81, 85, 91, 92, 219, 223, 97, 100, 231, 119, 120, 126]	0.420712	0.978261	0.557549	0.404555	6.84293e-05	0.0247619	0.00806244	0.206374	0.0576778	0	0	0	0	0	0	0	2	0	0	0	0	1	1	0	0	0	0	1	13	0	0	1	1	0	0	2	4	0
ZC3H11A	ENSG00000058673.17	chr1	+	203795794	203802568	3AS	TRUE	0.000248209	5.60865e-07	[139, 339, 579, 601, 326, 529, 684, 578, 770, 771, 782, 531, 791, 669, 677, 698, 724, 740, 357, 751, 767]	[7, 4, 59, 46, 230, 72, 202, 99, 195, 53, 57, 115, 527, 2, 314, 482, 563, 267, 17, 93, 105, 203, 205, 304, 526, 104, 114, 148, 425, 438, 452, 454, 530, 553, 649, 146, 665, 367, 369, 392, 420, 446, 448, 450, 501, 512, 516, 519, 12, 524, 532, 540, 550, 551, 552, 569, 66, 73, 590, 87, 603, 604, 613, 110, 648, 663, 154, 705, 730, 227, 744, 746, 240, 753, 242, 768, 265, 787, 288, 296, 313, 315, 356, 3…	1	0.428838	0.571162	0.664693	0.0588707	0.974974	0.000264483	0.798729	0.0509466	36	51	97	113	89	95	29	65	8	20	19	20	34	41	0	0	7	7	5	9	2	8	7	26	0	0	0	1	1
DYRK4	ENSG00000010219.13	chr12	+	4591298	4593001	3AS	TRUE	0.00027515	6.2514e-07	[44, 31, 85, 35, 36, 64, 52, 61, 129, 45, 67, 69, 91, 96, 143, 22, 24, 47, 48, 49, 72, 92, 98, 102, 116, 126, 135, 137, 139, 169, 172, 184, 330, 21, 29, 53, 54, 60, 68, 73, 74, 88, 95, 109, 119, 125, 138, 142, 168, 180, 185, 196, 201, 211, 214, 259, 263, 277, 297, 310, 329, 4, 6, 9, 23, 25, 26, 27, 28, 30, 32, 34, 37, 38, 39, 40, 42, 43, 51, 55, 56, 59, 62, 63, 66, 70, 75, 76, 81, 82, 83, 84, 86,…	[171, 223, 243, 267, 278, 226, 230, 246, 252, 253, 260, 266, 270, 276, 289, 258, 264, 11, 12, 13, 14, 271, 273, 279, 154, 282, 288, 290, 293, 295, 296, 317, 328, 336, 337, 221, 222, 225, 227, 228, 229, 232, 233, 234, 237, 240, 241, 242, 244, 245, 249, 250, 254]	0.907317	1	0.0926829	0.443548	0.0719296	0.00665861	1.16167e-07	0.19504	0.0782767	13	20	23	33	15	40	9	16	11	25	0	5	1	41	2	3	0	0	0	0	0	0	0	0	0	0	0	0	0
HELLS	ENSG00000119969.15	chr10	+	94545952	94546376	3AS	TRUE	0.000284242	6.49307e-07	[0, 97, 41, 4, 27, 48, 147, 1, 3, 109, 9, 38, 21, 43, 77, 163, 185, 16, 51, 119, 121, 152, 189, 5, 23, 26, 28, 29, 30, 34, 37, 39, 47, 49, 54, 55, 61, 63, 69, 71, 78, 79, 84, 89, 94, 104, 106, 108, 112, 114, 115, 120, 123, 126, 127, 130, 138, 140, 141, 145, 150, 154, 156, 158, 159, 160, 161, 165, 166, 171, 173, 178, 179, 184, 186, 188, 191, 193, 197]	[12, 70, 143, 99, 170, 76, 142, 144, 151, 183, 155, 124, 31]	0.107303	1	0.892697	0.106262	2.89194e-05	0.00792042	1.24049e-07	0.0652924	0.00145181	0	10	1	8	0	12	0	1	1	9	3	25	0	2	1	4	3	12	3	16	0	0	1	12	1	7	0	4	0
RHNO1	ENSG00000171792.11	chr12	+	2877282	2885282	3AS	FALSE	0.000286638	6.5832e-07	[0, 6, 18, 13, 19, 20, 12, 33, 3, 5, 7, 27, 29, 36]	[8, 25, 26, 31, 34, 21]	0.00858896	0.969231	0.960642	0.138831	0.00586061	0.0130118	0.000189001	0.0745022	0.00745223	3	15	0	10	1	25	2	44	5	25	1	23	1	31	2	32	3	8	10	27	0	7	1	8	0	0	2	12	4
GPCPD1	ENSG00000125772.14	chr20	-	5575515	5575815	IR	TRUE	0.000287038	6.62783e-07	[47, 68, 784, 1090, 834, 71, 727, 1402, 1287, 1810, 1305, 675, 1059, 1067, 688, 307, 1594, 729, 985, 862, 1277, 894, 1796, 1543, 1807, 1553, 1658, 1561, 28, 1180, 1308, 1436, 32, 1439, 674, 1060, 1315, 1571, 1064, 1575, 1838, 1458, 52, 1724, 1821, 1612, 846, 847, 1104, 721, 1360, 723, 1742, 1366, 856, 1242, 1116, 1367, 1371, 1494, 1501, 1755, 1758, 1508, 741, 1624, 376, 1657, 891, 1151]	[64, 29, 101, 118, 93, 115, 171, 138, 203, 176, 21, 123, 4, 202, 403, 11, 196, 240, 211, 154, 162, 126, 125, 141, 144, 660, 164, 210, 225, 369, 134, 181, 227, 269, 797, 292, 301, 370, 389, 146, 149, 353, 104, 148, 167, 186, 701, 204, 221, 391, 543, 1100, 143, 656, 161, 183, 188, 710, 207, 794, 798, 823, 314, 321, 335, 338, 352, 398, 930, 425, 515, 537, 565, 601, 92, 108, 620, 624, 127, 130, 131, …	0.536082	1	0.463918	0.638375	0.0537498	0.977793	0.000487438	0.772853	0.0603892	31	40	181	187	215	241	85	94	37	49	49	54	70	72	6	6	7	17	6	11	6	8	7	22	0	0	0	3	7
NAP1L4	ENSG00000205531.13	chr11	-	2945646	2951258	ES	FALSE	0.000292651	6.8198e-07	[0, 15, 121, 40, 69, 145, 28, 190, 81, 39, 21, 126, 159, 95, 132, 49, 55, 110, 134, 4, 43, 44, 53, 86, 141, 181, 271, 14, 67, 85, 96, 157, 171, 184, 192, 218, 241, 278, 302, 306, 9, 13, 68, 94, 99, 103, 108, 112, 124, 139, 140, 143, 151, 183, 193, 195, 232, 236, 256, 260, 270, 294, 303, 305, 312, 314, 317, 320, 364, 2, 16, 47, 48, 51, 54, 57, 58, 59, 66, 70, 75, 88, 89, 90, 91, 93, 100, 102, 104,…	[6, 11, 117, 36, 79, 26, 62, 130, 8, 197, 12, 42, 158, 20, 83, 19, 136, 194, 30, 80, 97, 131, 64, 123, 133, 150, 251, 115, 122, 137, 138, 175, 279, 31, 73, 76, 120, 152, 154, 163, 179, 204, 255, 281, 356, 33, 63, 82, 116, 119, 153, 164, 228, 246, 282, 316, 345, 352, 362, 1, 5, 7, 10, 17, 18, 22, 27, 29, 32, 35, 41, 45, 46, 50, 52, 65, 72, 74, 78, 84, 92, 98, 101, 111, 113, 114, 118, 127, 135, 144…	0.338893	0.456759	0.117866	0.335847	0.022743	0.479747	1.25431e-05	0.411719	0.0166946	8	29	10	48	60	105	38	90	0	0	21	51	0	0	45	110	5	19	3	16	21	50	14	46	0	0	10	42	5
ENTPD1	ENSG00000138185.20	chr10	+	95866176	95868540	ALJ	TRUE	0.000292651	6.83198e-07	[11, 494, 38, 65, 41, 91, 143, 120, 83, 159, 131, 62, 122, 183, 125, 269, 419, 35, 52, 141, 149, 217, 277, 344, 267, 275, 355, 13, 25, 36, 46, 118, 135, 191, 293, 312, 324, 354, 365, 370, 459, 574, 22, 28, 53, 75, 92, 111, 130, 189, 201, 223, 228, 229, 278, 284, 294, 301, 309, 317, 339, 363, 496, 523, 39, 43, 68, 78, 80, 86, 106, 108, 112, 128, 132, 136, 193, 198, 239, 249, 283, 323, 348, 351, 35…	[3, 2, 6, 458, 55, 44, 30, 89, 12, 94, 40, 47, 1, 490, 15, 72, 27, 32, 57, 77, 19, 475, 56, 70, 99, 214, 498, 100, 150, 474, 45, 103, 127, 14, 457, 473, 9, 115, 145, 469, 23, 24, 10, 134, 234, 251, 471, 4, 34, 61, 116, 186, 230, 413, 499, 109, 114, 140, 210, 248, 463, 81, 96, 124, 177, 513, 107, 171, 209, 337, 343, 345, 497, 528, 16, 76, 101, 102, 113, 129, 162, 170, 190, 194, 205, 211, 226, 232,…	0.616606	0.37865	0.237955	0.767936	0.0147672	0.892469	0.000220964	0.832268	0.00671028	199	234	274	311	414	484	87	122	198	223	81	91	248	305	83	99	35	40	28	59	47	66	16	19	0	4	7	13	48
GALK2	ENSG00000156958.15	chr15	+	49239367	49281986	3AS	TRUE	0.000292651	6.86585e-07	[10, 0, 3, 9, 19, 79, 103, 74, 21, 49, 68, 7, 90, 92, 89, 127, 131, 135, 169, 1, 2, 8, 15, 17, 24, 38, 97, 140, 155, 174, 180, 195, 197, 242, 257, 6, 11, 14, 29, 37, 54, 60, 67, 93, 100, 113, 116, 119, 132, 134, 154, 157, 165, 170, 177, 184, 192, 210, 211, 220, 224, 228, 252, 259, 260, 272, 4, 5, 13, 16, 18, 26, 27, 28, 30, 34, 36, 39, 40, 41, 42, 45, 46, 50, 51, 53, 55, 59, 63, 64, 65, 66, 69, 7…	[33, 186, 44, 182, 80, 212, 268, 275, 22, 279, 283, 285, 287, 48, 185, 58, 57, 61, 205, 84]	0.42328	0.545455	0.122174	0.138941	0.0139837	0.00471346	7.70107e-08	0.0699266	0.0115447	4	12	1	18	0	42	1	19	3	27	0	35	0	24	0	18	2	11	6	10	2	9	0	2	0	0	0	0	1
LYZ	ENSG00000090382.7	chr12	+	69350272	69352211	3AS	TRUE	0.000301594	7.11288e-07	[11]	[50, 292, 267, 410, 282, 124]	0	0.97561	0.97561	0.86529	0.000860707	0.182091	5.76734e-05	0.698665	0.0494507	0	0	0	0	0	0	0	0	0	0	0	0	0	0	0	0	3	3	4	5	27	31	12	13	0	0	3	3	18
MINDY4	ENSG00000106125.14	chr7	+	30771556	30778431	3AS	TRUE	0.000316342	7.53183e-07	[2, 4, 8, 12, 11, 13, 15, 5, 10, 14, 16, 22, 1, 3, 6, 7, 9, 18, 20, 21, 23, 25, 28, 29, 30, 32, 33, 34]	[0, 17, 35, 38, 39, 40, 24, 36, 19, 26, 27]	0.0619048	1	0.938095	0.422702	4.92435e-05	0.0258439	2.75332e-06	0.228963	0.0470325	0	1	0	0	0	1	0	1	0	0	0	0	0	0	0	0	0	0	13	30	3	4	2	3	0	0	1	2	0
ZNF548	ENSG00000188785.12	chr19	+	57397174	57398429	3AS	FALSE	0.000316342	7.53884e-07	[1, 0, 13, 9, 12, 27, 37, 53, 38, 46, 10, 19, 39, 65, 31, 41, 62, 26, 28, 40, 52, 56, 11, 14, 18, 25, 29, 32, 33, 34, 47, 48, 49, 54, 55, 57, 58, 59, 60, 61, 63, 64, 66, 67, 68, 69, 71, 76, 78, 82, 83, 84]	[2, 17, 15, 5, 45, 7, 43, 21, 24, 4, 6, 75, 77, 16, 79, 51, 80, 22]	0.16777	0.0841424	0.083628	0.383267	0.0741326	0.0384375	0.00252442	0.217471	0.0664717	26	34	1	49	7	93	6	32	23	79	0	37	0	39	1	6	0	7	10	11	8	22	18	31	0	0	3	4	6
CYLD	ENSG00000083799.18	chr16	+	50780044	50781245	3AS	TRUE	0.000334201	8.00571e-07	[1, 5, 20, 16, 17, 39, 0, 4, 18, 65, 41, 40, 2, 13, 9, 76, 102, 10, 68, 32, 80, 28, 87, 101, 34, 304, 30, 194, 143, 122, 95, 163, 186, 11, 6, 172, 178, 25, 27, 47, 86, 517, 23, 46, 55, 77, 81, 137, 140, 344, 424, 29, 151, 219, 233, 399, 234, 606, 105, 196, 259, 485, 583, 67, 69, 147, 174, 278, 297, 319, 428, 568, 611, 15, 74, 98, 146, 148, 157, 168, 198, 221, 415, 630, 632, 871, 61, 113, 180, 220…	[43, 489, 674, 152, 284, 193, 292, 670, 206, 764, 429, 716, 256, 873, 496, 387, 410, 75, 645, 150, 683, 717, 785, 810, 902, 907, 516, 621, 678, 694, 731, 732, 736, 765, 773, 788, 826, 836, 838, 846, 893, 909, 920, 934, 933, 426, 949, 959, 961, 490, 514, 520, 525, 541, 543, 38, 554, 93, 652, 668, 669, 175, 705, 713, 715, 718, 719, 724, 215, 727, 734, 737, 740, 747, 749, 750, 756, 759, 760, 763, 76…	0.0998228	0.997389	0.897566	0.0884928	0.00716401	0.0117879	4.56173e-05	0.0513479	0.00410852	13	163	3	197	6	379	19	140	12	171	4	162	1	208	0	69	4	18	26	145	18	141	62	347	0	0	0	20	19
ZNF41	ENSG00000147124.12	chrX	-	47456398	47467409	3AS	TRUE	0.000391319	9.42228e-07	[4, 2, 13, 11, 47, 49, 82, 12, 70, 56, 22, 59, 63, 14, 60, 68, 95, 98, 118, 126, 129, 5, 23, 50, 76, 78, 80, 81, 89, 94, 97, 112, 116]	[7, 18, 25, 20, 9, 55, 36, 1, 37, 16, 53, 40, 26, 52, 84, 85, 106, 114, 28, 33, 35, 46, 48, 57, 58, 62, 67, 72, 77, 100, 110, 117, 119, 122]	0.00382409	1	0.996176	0.630069	0.00628867	0.319946	0.00167907	0.488827	0.0267772	20	24	48	79	21	54	25	35	10	17	9	19	33	44	4	7	1	3	2	2	1	4	0	1	0	0	1	1	0
TPP2	ENSG00000134900.12	chr13	+	102645009	102646279	IR	TRUE	0.000396695	9.6007e-07	[90, 58, 82, 76, 70, 217, 271, 580, 584, 328, 492, 498, 505, 572, 62, 81, 88, 97, 621, 112, 210, 214, 220, 233, 242, 246, 255, 260, 411, 504, 507, 508, 512, 513, 514, 520, 533, 552, 57, 63, 64, 71, 78, 80, 595, 84, 85, 89, 92, 94, 98, 612, 102, 615, 616, 105, 617, 618, 108, 619, 620, 634, 636, 204, 209, 213, 218, 221, 228, 230, 232, 247, 251, 253, 258, 261, 264, 267, 269, 272, 276, 277, 279, 280,…	[15, 23, 30, 56, 40, 51, 123, 165, 21, 73, 87, 164, 45, 329, 339, 46, 60, 114, 173, 371, 455, 43, 61, 68, 91, 107, 121, 137, 138, 159, 197, 226, 238, 243, 336, 340, 354, 358, 367, 386, 402, 428, 493, 517, 6, 11, 17, 29, 31, 38, 44, 564, 66, 72, 74, 77, 86, 599, 605, 96, 109, 117, 120, 130, 131, 134, 141, 150, 152, 156, 160, 162, 169, 174, 178, 185, 186, 191, 192, 203, 208, 211, 212, 215, 219, 223…	1	1	0	0.389915	0.0612007	0.888063	0.0760031	0.6419	0.144964	0	5	15	23	10	17	6	38	1	5	0	0	6	6	2	3	0	1	0	2	0	0	0	6	0	0	0	0	2
GABPA	ENSG00000154727.11	chr21	+	25735578	25741572	3AS	TRUE	0.000400741	9.74811e-07	[3, 37, 9, 41, 22, 105, 63, 65, 77, 83, 84, 106, 60, 85, 97, 113, 131, 8, 14, 25, 27, 44, 46, 57, 58, 61, 69, 70, 71, 76, 78, 79, 82, 86, 87, 90, 101, 103, 114, 115, 118, 120, 135, 136, 137]	[26, 89, 53, 96, 94, 128, 130, 133, 15]	0.0675241	0.0404624	0.0270617	0.166837	0.0113398	0.0242521	9.35918e-07	0.0968736	0.0107546	24	77	4	72	6	65	21	66	7	53	3	93	0	35	1	4	3	13	0	14	4	9	6	14	0	0	0	3	1
FIG4	ENSG00000112367.12	chr6	+	109735298	109738324	IR	FALSE	0.000411915	1.01109e-06	[1, 0, 12, 22, 42, 66, 89, 310, 100, 8, 43, 26, 50, 7, 110, 398, 117, 48, 9, 45, 58, 54, 55, 60, 19, 38, 104, 194, 289, 213, 343, 470, 14, 49, 52, 169, 200, 243, 254, 283, 406, 13, 106, 107, 134, 206, 306, 392, 431, 479, 507, 515, 548, 44, 53, 144, 148, 170, 223, 292, 323, 381, 536, 24, 36, 64, 76, 97, 105, 108, 135, 151, 184, 221, 224, 234, 245, 287, 288, 301, 311, 313, 315, 366, 419, 524, 564, …	[4, 88, 551, 73, 47, 267, 444, 229, 543, 576, 806, 572, 764, 511, 259, 521, 160, 161, 421, 566, 696, 449, 459, 718, 477, 226, 751, 244]	0.181752	0.0930736	0.0886789	0.177443	0.0199782	0.0348116	0.000324363	0.0868774	0.00668555	15	180	60	288	52	495	66	273	7	258	16	474	21	293	8	78	2	32	1	2	1	38	3	3	0	1	3	3	1
SLC7A7	ENSG00000155465.20	chr14	-	22773728	22773932	IR	TRUE	0.000411915	1.01216e-06	[330, 339, 345, 5, 346, 363, 372, 337, 357, 185, 365, 384, 414, 418, 444, 392, 409, 417, 419, 423, 425, 428, 438, 332, 480, 378, 394, 397, 401, 402, 405, 412, 413, 415, 548, 421, 554, 427, 429, 555, 431, 557, 560, 434, 562, 565, 566, 567, 441, 568, 569, 573, 447, 450, 451, 579, 580, 581, 455, 456, 333, 342, 343, 344, 347, 348, 475, 354, 482, 377, 379]	[183, 80, 15, 127, 192, 257, 494, 308, 313, 154, 479]	0.317568	0.46875	0.151182	0.0236841	0.00490383	0.87509	0.0289341	0.271392	0.163737	0	21	1	9	0	46	0	64	0	10	0	1	6	24	0	4	0	2	0	6	0	78	0	9	0	0	0	0	0
PPM1M	ENSG00000164088.18	chr3	+	52249322	52249669	3AS	TRUE	0.00045083	1.11335e-06	[0, 14, 37, 4, 11, 41, 24, 63, 20, 26, 48, 74, 7, 16, 19, 21, 22, 25, 27, 30, 38, 42, 44, 61, 76, 77, 80, 82, 96, 104]	[15, 8, 13, 5, 78, 49, 51, 95, 9, 39, 62, 64, 65, 67, 73, 75, 83, 87, 88, 90, 94, 100]	0.084507	0.233333	0.148826	0.430537	0.00763025	0.102652	3.73736e-06	0.229141	0.026657	0	1	1	5	0	5	15	25	0	1	0	0	3	10	0	0	0	2	3	7	4	5	0	0	0	0	7	13	0
STXBP2	ENSG00000076944.16	chr19	+	7639807	7640730	IR	TRUE	0.0004578	1.13676e-06	[0, 21, 83, 27, 37, 71, 117, 103, 84, 33, 78, 32, 54, 102, 105, 169, 6, 15, 177, 39, 49, 81, 86, 123, 146, 190, 18, 26, 51, 62, 67, 89, 97, 104, 109, 114, 129, 139, 141, 147, 151, 160, 161, 173, 174, 175, 183, 189, 191, 215, 2, 5, 10, 12, 16, 19, 20, 23, 28, 29, 31, 34, 35, 42, 43, 44, 46, 53, 55, 64, 68, 70, 75, 76, 80, 87, 88, 92, 93, 95, 96, 107, 108, 111, 115, 122, 124, 126, 130, 133, 138, 14…	[7, 38, 110, 59, 14, 61, 119, 50, 57, 66, 60, 65, 74, 112, 11, 153, 40, 52, 58, 91, 1, 3, 131, 132, 8, 9, 135, 143, 148, 22, 36, 45, 47, 48, 176, 56, 63, 69, 73, 79, 85, 216, 98, 106, 118, 219]	0.161059	0.27673	0.11567	0.0218188	0.000265796	0.168315	0.00886103	0.0955139	0.00964775	0	1	0	16	0	18	1	43	0	3	0	2	0	45	1	20	0	6	1	203	0	24	1	23	0	0	0	84	0
EP400	ENSG00000183495.14	chr12	+	132076593	132077400	IR	TRUE	0.0004578	1.14187e-06	[44, 49, 53, 10, 52, 60, 55, 25, 8, 65, 6, 24, 67, 71, 11, 16, 42, 88, 22, 69, 91, 2, 9, 43, 66, 76, 94, 146, 23, 102, 121, 141, 1, 30, 59, 61, 72, 80, 89, 92, 93, 97, 98, 106, 120, 128, 144, 3, 4, 5, 13, 14, 15, 18, 19, 20, 21, 28, 31, 32, 33, 34, 38, 39, 40, 41, 62, 64, 73, 84, 85, 86, 90, 95, 104, 107, 109, 111, 113, 115, 116, 119, 122, 123, 124, 125, 126, 129, 131, 132, 135, 136, 138, 147, 14…	[47, 51, 75, 81, 58, 96, 36, 7, 117, 103, 82, 114, 118]	0.941301	0.969512	0.0282109	0.021917	0.00209242	0.138446	0.000492085	0.0794701	0.0067525	0	72	0	103	0	85	0	79	3	28	3	35	2	30	0	30	0	0	0	0	0	1	0	2	0	0	0	1	0
AASDH	ENSG00000157426.14	chr4	-	56353613	56354038	IR	TRUE	0.000532755	1.33541e-06	[21, 240, 139, 69, 22, 23, 410, 167, 47, 334, 342, 349, 149, 443, 457, 471, 374, 375, 376, 265, 411, 28, 30, 416, 38, 45, 46, 173, 49, 438, 66, 67, 68, 451, 459, 76, 80, 81, 338, 339, 468, 346, 219, 482, 485, 489, 493, 494, 239, 372, 117, 380, 381]	[18, 11, 119, 6, 33, 156, 160, 111, 184, 194, 209, 269, 164, 235, 162, 169, 180, 182, 190, 206, 241, 264, 125, 130, 146, 181, 212, 251, 272, 284, 347, 15, 65, 72, 73, 86, 91, 102, 109, 134, 137, 144, 145, 198, 199, 205, 207, 210, 214, 220, 221, 222, 223, 228, 234, 243, 256, 268, 275, 286, 302, 310, 314, 316, 320, 322, 323, 343, 345, 354, 356, 358, 359, 371, 382, 400, 419, 420, 498, 501, 510]	1	0.994709	0.00529101	0.297287	0.0736476	0.894076	0.0115123	0.549041	0.127415	0	5	11	19	10	12	1	13	8	12	2	2	4	6	5	8	0	2	0	0	0	0	0	4	0	0	0	0	0
ABCC5	ENSG00000114770.17	chr3	-	183984894	183987769	3AS	TRUE	0.000542789	1.37316e-06	[10, 88, 118, 102]	[5, 45, 80, 119, 23, 6, 108, 117, 139, 15, 152, 154, 159, 160, 50, 58, 73, 78, 110]	0.0540541	0.065	0.0109459	0.966235	0.00524947	0.544679	0.0253188	0.806375	0.0615263	7	7	6	7	13	13	13	13	1	1	1	1	3	5	3	3	4	4	2	2	2	2	3	3	0	0	1	1	7
SEPTIN7	ENSG00000122545.20	chr7	+	35872766	35873613	IR	TRUE	0.000542789	1.37396e-06	[33, 23, 865, 1249, 841, 881, 929, 1232, 1042, 883, 1392, 24, 508]	[129, 130, 276, 833, 678, 359, 254, 902, 143, 442, 449, 389, 920, 1063, 682, 474, 103, 874, 514, 781, 655, 408, 1305, 550, 1070, 562, 445, 446, 969, 1099, 973, 858, 740, 104, 1008, 241, 757, 760, 1017, 1277]	0.178161	0.801418	0.623258	0.271473	0.0327085	0.858599	1.22419e-05	0.490603	0.104911	5	19	6	16	12	24	15	61	6	15	6	7	4	9	1	6	0	0	0	10	2	2	1	3	0	0	0	0	0
CASC3	ENSG00000108349.17	chr17	+	40167948	40168180	IR	TRUE	0.000551271	1.40224e-06	[45, 50, 323, 157, 123, 60, 320, 195, 396, 377, 260, 299, 125, 414]	[12, 159, 21, 36, 62, 192, 197, 339, 87, 136, 152, 31, 118, 411, 422, 317, 194, 196, 358, 128, 141, 275, 150, 279, 27, 33, 160, 417, 56, 314, 329, 208, 209, 216, 91, 257, 133, 137, 138, 394, 140, 142, 273, 276, 153, 35, 37, 421, 40, 175, 303, 434, 179, 183, 441, 191, 193, 68, 332, 80, 83, 337, 88, 223, 357, 359, 104, 234, 235, 365, 239, 244, 119, 120, 249]	1	1	0	0.734954	8.56304e-05	0.97061	2.03771e-06	0.830671	0.0157823	0	0	19	21	7	8	28	39	0	1	0	0	7	8	1	1	0	0	0	1	1	1	1	4	0	0	0	1	0
RBM17	ENSG00000134453.16	chr10	+	6089034	6089193	AFJ	TRUE	0.000553187	1.41394e-06	[11, 55, 72, 54, 106, 84, 105, 52, 39, 51, 38, 96, 40, 64, 94, 155, 156, 167, 171, 189, 8, 63, 68, 113, 114, 116, 192, 24, 74, 88, 95, 108, 126, 127, 147, 154, 169, 172, 185, 199, 12, 15, 28, 33, 53, 56, 69, 71, 73, 83, 85, 86, 87, 107, 112, 117, 133, 136, 137, 138, 139, 148, 149, 157, 158, 159, 166, 168, 170, 182, 183, 184, 186, 190, 194, 201, 202, 218, 219, 223, 225]	[2, 3, 1, 18, 5, 59, 7, 48, 36, 4, 44, 50, 43, 10, 35, 61, 45, 82, 17, 99, 58, 77, 78, 80, 76, 118, 174, 176, 26, 30, 47, 79, 81, 115, 125, 130, 135, 144, 151, 161, 37, 67, 103, 131, 162, 13, 23, 25, 29, 75, 93, 102, 104, 110, 111, 121, 122, 146, 150, 153, 173, 177, 207, 0, 6, 9, 14, 16, 19, 20, 21, 22, 27, 31, 32, 34, 41, 42, 46, 49, 57, 60, 62, 65, 66, 70, 89, 90, 91, 92, 97, 98, 100, 101, 109,…	0.873874	0.594589	0.279285	0.849125	0.0252936	0.954231	4.15715e-06	0.910718	0.00644025	128	140	178	189	284	315	331	364	98	110	172	195	210	220	80	85	8	9	33	33	43	44	43	50	0	9	27	28	47
MAP3K7	ENSG00000135341.18	chr6	-	90514201	90516681	ALJ	TRUE	0.000561397	1.44186e-06	[15, 9, 43, 69, 5, 62, 125, 64, 126, 129, 101, 23, 12, 37, 70, 97, 130, 347, 142, 10, 267, 293, 308, 39, 77, 133, 312, 206, 241, 3, 4, 25, 61, 94, 223, 224, 255, 289, 388, 34, 93, 112, 115, 128, 145, 169, 207, 208, 222, 246, 263, 272, 278, 288, 292, 300, 302, 304, 305, 307, 311, 315, 334, 354, 384, 385, 390, 419, 432, 22, 26, 32, 41, 45, 48, 49, 51, 60, 67, 68, 71, 72, 73, 75, 76, 78, 95, 102, 10…	[1, 0, 14, 11, 6, 28, 7, 19, 21, 149, 132, 20, 24, 96, 88, 91, 140, 44, 84, 134, 35, 57, 370, 2, 29, 42, 50, 150, 99, 139, 199, 18, 122, 127, 147, 188, 374, 31, 56, 79, 86, 111, 166, 38, 54, 66, 83, 201, 317, 53, 100, 137, 167, 185, 281, 373, 13, 110, 116, 151, 152, 179, 183, 184, 187, 210, 212, 220, 321, 8, 16, 59, 109, 118, 135, 154, 164, 175, 322, 323, 346, 410, 430, 47, 98, 103, 113, 120, 121…	0.89729	0.396585	0.500705	0.791996	0.00732888	0.911439	0.000792045	0.851195	0.00689627	71	89	116	170	162	238	108	159	113	148	164	184	151	183	40	45	30	32	11	24	21	28	56	79	3	3	4	8	19
MFN1	ENSG00000171109.19	chr3	+	179347810	179348847	3AS	TRUE	0.000569143	1.46878e-06	[2, 95, 32, 28, 91, 53, 90, 43, 75, 108, 116, 159, 211, 29, 66, 88, 84, 98, 129, 205, 223, 249, 350, 42, 218, 243, 257, 265, 281, 300, 343, 344, 20, 35, 49, 54, 60, 62, 71, 77, 100, 107, 142, 147, 152, 157, 169, 170, 176, 197, 215, 217, 220, 229, 240, 255, 266, 268, 269, 274, 277, 278, 280, 284, 288, 290, 291, 298, 307, 314, 319, 320, 329, 342, 345, 357, 361, 363, 365, 388, 398]	[0, 1, 5, 83, 7, 3, 6, 30, 21, 64, 87, 106, 22, 36, 50, 70, 163, 26, 103, 37, 196, 96, 33, 125, 11, 97, 168, 48, 99, 4, 27, 119, 181, 38, 127, 155, 326, 9, 13, 47, 126, 131, 148, 175, 239, 61, 73, 76, 86, 89, 104, 115, 123, 124, 128, 133, 137, 151, 195, 248, 311, 322, 370, 373, 378, 25, 31, 45, 63, 78, 85, 94, 112, 118, 120, 149, 185, 206, 209, 214, 219, 227, 232, 241, 242, 244, 250, 267, 305, 30…	0.142606	0.149453	0.00684759	0.779889	0.00691326	0.872409	0.000291561	0.825858	0.00542059	262	346	198	292	171	236	142	217	106	134	224	297	137	180	37	53	21	30	25	25	31	33	51	54	0	2	11	12	52
SLC9B2	ENSG00000164038.16	chr4	-	103047408	103049020	ALJ	TRUE	0.000604073	1.56639e-06	[4, 2, 3, 5, 11, 15, 1, 12, 29, 23, 6, 8, 64, 73, 100, 38, 93, 128, 177, 10, 13, 25, 26, 30, 35, 94, 102, 146, 153, 162, 51, 57, 60, 66, 74, 86, 88, 98, 99, 107, 117, 135, 148, 171, 0, 31, 47, 48, 49, 50, 59, 67, 81, 83, 87, 89, 91, 92, 106, 109, 110, 112, 114, 119, 120, 137, 145, 152, 154, 155, 160, 164, 170, 174, 181, 186, 188, 7, 16, 17, 18, 19, 20, 21, 22, 24, 27, 28, 32, 33, 34, 36, 40, 41, …	[14, 9, 45, 90, 122, 39, 82, 121, 157]	0.14342	0.0104167	0.133003	0.025385	9.95014e-07	0.117067	0.00137149	0.069835	0.0028018	0	9	1	44	0	51	2	66	0	16	1	29	0	27	0	5	0	2	0	6	1	2	0	33	0	3	1	15	1
CDC27	ENSG00000004897.12	chr17	-	47151918	47154671	3AS	FALSE	0.000606128	1.5792e-06	[4, 1, 27, 32, 0, 21, 164, 13, 183, 51, 58, 41, 29, 171, 30, 2, 23, 106, 100, 345, 362, 306, 12, 82, 151, 133, 420, 122, 107, 321, 182, 239, 75, 31, 73, 259, 35, 89, 236, 11, 113, 143, 166, 243, 247, 251, 252, 287, 240, 489, 22, 134, 249, 286, 55, 74, 280, 491, 227, 248, 381, 509, 5, 72, 101, 168, 276, 297, 315, 329, 359, 365, 407, 410, 412, 456, 566, 577, 18, 26, 28, 194, 226, 233, 264, 278, 408…	[39, 25, 118, 66, 181, 92, 117, 307, 38, 114, 124, 153, 136, 646, 3, 15, 263, 317, 294, 301, 140, 150, 197, 389, 645, 222, 464, 594, 601, 141, 682, 195, 721, 213, 282, 796, 835, 376, 448, 482, 496, 518, 549, 582, 589, 593, 96, 619, 623, 115, 627, 120, 643, 644, 191, 722, 731, 735, 783, 303, 331, 399, 924, 929, 955, 450, 967, 466, 484, 513, 515, 521, 535, 536, 541, 545, 557, 46, 570, 574, 86, 87, …	0.524161	0.470437	0.0537242	0.192478	0.00652664	0.0702367	0.00156377	0.132293	0.0078558	24	91	16	123	19	183	9	81	13	92	7	107	2	78	4	26	20	55	27	64	4	36	39	270	0	1	8	47	33
TMCC2	ENSG00000133069.17	chr1	+	205271795	205273338	ALJ	TRUE	0.000629971	1.6491e-06	[8, 11, 9, 6, 28, 15, 22, 21, 27, 19, 20, 55, 16, 23, 47, 52, 62, 61, 78, 94, 7, 17, 25, 32, 33, 37, 40, 51, 54, 57, 77, 79, 81, 87, 98, 0, 1, 12, 13, 14, 18, 24, 31, 35, 36, 41, 43, 44, 45, 48, 49, 53, 56, 58, 59, 63, 64, 65, 67, 68, 70, 73, 74, 75, 80, 82, 83, 84, 86, 88, 89, 90, 91, 93, 95, 96, 99, 101, 102, 103, 105, 106, 107, 110, 111, 112]	[2, 10, 30, 34, 97, 29, 46, 50, 39, 76, 38, 72, 85, 104, 3, 42, 60, 66, 69, 71, 92, 100, 108, 109]	0.0551698	0.0360046	0.0191651	0.396329	0.0118066	0.0433429	9.87436e-07	0.28087	0.0389416	0	0	0	0	0	0	0	0	0	0	0	0	0	0	0	0	0	0	4	6	1	1	59	146	0	0	1137	2572	1
RIOK1	ENSG00000124784.9	chr6	+	7393303	7395052	3AS	FALSE	0.000671784	1.76685e-06	[0, 1, 2, 6, 55, 58, 118, 125, 14, 77, 8, 62, 93, 33, 59, 132, 51, 15, 21, 66, 70, 74, 107, 57, 73, 86, 133, 236, 13, 32, 46, 53, 61, 65, 71, 162, 166, 210, 3, 10, 39, 68, 123, 238, 38, 41, 47, 69, 72, 79, 83, 91, 95, 97, 98, 99, 105, 111, 112, 122, 129, 137, 154, 171, 193, 203, 207, 241, 250, 254, 9, 16, 18, 19, 20, 26, 27, 34, 43, 44, 50, 54, 60, 67, 75, 84, 92, 94, 101, 102, 104, 106, 108, 109…	[4, 17, 22, 24, 90, 130, 12, 28, 156, 35, 257, 186, 126, 256, 145, 88, 267, 144, 146, 36, 103, 237, 242, 246, 131, 259, 261, 11, 269, 139, 270, 143, 277, 273, 25, 151, 285, 161, 164, 37, 40, 48, 49, 177, 184, 185, 63, 64, 194, 195, 196, 201, 205, 212, 87, 216, 89, 223, 96, 226, 100, 229, 235, 245, 252, 253, 127, 290, 294, 296]	0.334404	0.992754	0.65835	0.206761	0.00905811	0.0856438	0.000516886	0.144596	0.00672933	12	72	19	57	17	109	26	79	13	109	23	178	6	107	2	30	6	42	5	39	8	38	6	16	0	0	4	7	9
OXA1L	ENSG00000155463.14	chr14	+	22768171	22769776	IR	TRUE	0.000678009	1.79159e-06	[37, 12, 38, 36, 96, 69, 65, 148, 175, 147, 158, 174, 189, 92, 165, 170, 45, 46, 173, 177, 178, 179, 182, 190, 191, 206, 210, 213, 214, 219, 220, 95, 224]	[0, 13, 6, 25, 29, 8, 21, 9, 15, 33, 24, 16, 32, 7, 23, 5, 60, 4, 51, 31, 14, 27, 56, 39, 53, 34, 54, 61, 63, 164, 11, 26, 88, 89, 112, 141, 167, 17, 40, 49, 62, 79, 103, 108, 115, 119, 139, 155, 42, 48, 64, 85, 98, 106, 113, 116, 118, 126, 157, 159, 184, 208, 233, 2, 28, 35, 43, 66, 73, 78, 82, 97, 100, 104, 110, 111, 114, 117, 120, 128, 130, 131, 137, 143, 145, 146, 151, 152, 153, 154, 156, 160…	1	0.97691	0.0230896	0.554434	0.0676734	0.940059	0.00219738	0.707874	0.0725053	17	38	149	169	133	166	137	158	18	70	30	39	49	66	10	63	3	9	9	24	8	23	24	37	1	1	1	9	13
CD72	ENSG00000137101.13	chr9	-	35616270	35616599	3AS	TRUE	0.000689526	1.83426e-06	[11, 21, 140, 149, 159, 163, 192, 136, 9, 10, 137, 142, 148, 151, 158, 161, 162, 165, 168, 46, 175, 180, 183, 184, 186, 187, 196, 197]	[12, 1, 6, 47, 4, 28, 40, 85, 18, 0, 53, 26, 157, 54, 59, 96, 103, 124, 129, 147, 154, 156, 164, 39, 42, 44, 45, 172, 176, 51, 61, 63, 70, 198, 72, 201, 79, 93, 95, 99, 100, 106, 113, 114, 126, 202, 204, 208, 209, 211, 212, 213]	1	0.522843	0.477157	0.548442	0.0403004	0.984226	1.08651e-06	0.771976	0.0615884	3	10	5	11	0	1	7	15	2	3	32	34	5	21	8	12	0	0	0	0	2	2	0	0	0	0	0	0	0
TRAPPC6B	ENSG00000182400.15	chr14	-	39158402	39159449	3AS	TRUE	0.000689526	1.83905e-06	[4, 6, 37, 22, 36, 49, 55, 121, 146, 67, 198, 122, 124, 145, 52, 56, 189, 220, 116, 119, 126, 132, 135, 140, 147, 152, 25, 158, 38, 165, 40, 167, 172, 174, 47, 48, 175, 176, 182, 183, 193, 71, 199, 203, 204, 91, 123]	[27, 23, 105, 101, 76, 162, 41, 173, 78, 79, 206, 178, 211, 180, 212, 89]	1	1	0	0.247326	0.0558789	0		0.12013	0.0453255	9	27	2	35	0	18	6	20	5	15	0	23	0	17	0	6	1	4	0	3	0	0	3	3	0	0	0	0	2
UPF3B	ENSG00000125351.12	chrX	-	119838051	119838366	3AS	TRUE	0.00071478	1.91524e-06	[0, 1, 3, 19, 26, 41, 55, 31, 2, 52, 8, 29, 7, 50, 56, 30, 66, 9, 46, 58, 65, 73, 87, 98, 119, 5, 6, 12, 15, 17, 24, 25, 28, 38, 39, 48, 51, 57, 59, 60, 61, 64, 68, 71, 75, 76, 78, 81, 82, 84, 85, 88, 90, 91, 92, 94, 96, 100, 102, 103, 104, 106, 107, 110, 111, 113, 115, 118, 120, 122, 123, 129, 130, 133, 134, 135, 136]	[35, 13, 22, 18, 95, 42, 36, 112, 114, 116, 121, 124, 125, 126]	0.185695	1	0.814305	0.111567	0.00444656	0.00490714	8.48613e-08	0.0575585	0.00608705	2	8	1	17	3	20	1	11	5	17	0	29	0	21	0	6	0	5	0	10	1	6	1	7	1	1	0	1	0
SYF2	ENSG00000117614.10	chr1	-	25228235	25228997	3AS	TRUE	0.000751486	2.02287e-06	[0, 3, 9, 11, 25, 37, 32, 40, 71, 7, 74, 84, 76, 89, 96, 4, 16, 18, 20, 27, 31, 35, 38, 39, 46, 49, 54, 61, 62, 64, 65, 66, 69, 72, 73, 78, 79, 81, 85, 90, 91, 92, 93, 97]	[51, 21, 55, 50, 12, 57, 33, 44, 48, 52, 53, 82, 68, 47, 80, 83, 59, 95]	0.123706	1	0.876294	0.0890675	0.00243616	0.0151431	2.71913e-07	0.0517561	0.00248565	0	15	3	22	14	38	6	42	4	49	3	34	0	45	2	29	0	8	4	30	5	48	8	62	6	201	1	22	8
DOCK10	ENSG00000135905.20	chr2	-	224805514	224806125	3AS	TRUE	0.000774423	2.09417e-06	[24, 30, 23, 406, 392, 279, 488, 149, 281, 422, 479, 480, 506, 512, 513, 269, 19, 404, 21, 407, 409, 159, 31, 33, 416, 419, 36, 544, 38, 40, 424, 425, 426, 427, 430, 559, 432, 188, 327, 457, 461, 342, 477, 481, 482, 484, 485, 240]	[2, 4, 74, 25, 109, 18, 136, 119, 127, 280, 58, 110, 382, 8, 107, 263, 270, 3, 29, 120, 121, 125, 153, 262, 405, 7, 56, 573, 71, 118, 134, 177, 179, 234, 236, 261, 271, 345, 380, 447, 462, 508, 0, 11, 528, 530, 531, 532, 22, 535, 534, 28, 542, 32, 34, 37, 39, 55, 567, 570, 63, 576, 577, 66, 67, 578, 115, 122, 123, 128, 129, 132, 151, 152, 154, 176, 178, 180, 181, 190, 215, 217, 218, 220, 221, 222…	0.270968	0.20904	0.0619282	0.683299	0.0162825	0.955447	2.12853e-06	0.837817	0.0249108	23	39	36	59	67	103	17	39	6	14	12	12	12	15	1	1	1	2	0	0	1	1	0	0	0	0	0	0	1
PSTPIP1	ENSG00000140368.13	chr15	+	77035563	77035810	3AS	FALSE	0.000796534	2.1638e-06	[6, 63, 131, 47, 168, 129, 144, 145, 167, 55, 1, 139, 141, 14, 147, 20, 148, 150, 151, 26, 156, 158, 159, 160, 164, 166, 169, 43, 50, 51, 75, 103, 110, 114, 115, 118, 121]	[3, 19, 4, 9, 25, 21, 31, 5, 35, 22, 28, 64, 7, 77, 34, 87, 152, 11, 15, 27, 33, 52, 57, 60, 65, 68, 72, 74, 105, 109, 0, 8, 10, 12, 13, 18, 23, 24, 29, 30, 32, 36, 37, 38, 40, 41, 42, 44, 45, 46, 48, 49, 53, 54, 56, 58, 59, 66, 67, 69, 70, 76, 78, 81, 82, 83, 86, 90, 91, 92, 93, 94, 95, 97, 98, 99, 100, 101, 102, 104, 106, 108, 111, 112, 113, 116, 117, 120, 123, 125, 127, 132, 133, 134, 135, 136…	0.372727	0.329091	0.0436364	0.70314	0.00739828	0.936256	3.51194e-06	0.809828	0.017361	5	5	4	6	5	7	11	20	12	16	2	3	26	29	6	6	3	5	23	35	7	10	22	28	0	0	28	33	2
ANKHD1	ENSG00000131503.21	chr5	+	140485732	140487005	3AS	FALSE	0.000826843	2.25634e-06	[12, 16, 3, 23, 144, 13, 26, 258, 238, 260, 53, 62, 336, 234, 240, 124, 475, 480, 252, 309, 306, 269, 273, 533, 553, 48, 311, 587, 332, 334, 357, 363, 490, 255, 256, 134, 394, 139, 395, 147, 275, 524, 288, 168, 174, 317, 445, 449, 450, 452, 581, 73, 335, 337, 466, 590, 594, 218, 351, 355, 356, 103, 232, 239, 494, 370, 373, 375, 249, 125, 615]	[0, 8, 11, 2, 65, 46, 19, 15, 31, 47, 21, 349, 18, 52, 98, 78, 43, 5, 250, 521, 151, 310, 474, 164, 242, 415, 177, 248, 414, 417, 149, 161, 180, 254, 345, 478, 1, 17, 20, 536, 51, 582, 97, 99, 170, 192, 233, 274, 307, 410, 519, 520, 531, 32, 45, 69, 580, 74, 585, 80, 81, 592, 595, 162, 205, 237, 276, 282, 285, 292, 305, 316, 319, 321, 323, 358, 372, 374, 396, 397, 412, 476, 483, 484, 485, 514, 6,…	0.98778	0.97216	0.0156202	0.920919	0.00167955	0.755122	0.00883891	0.837826	0.0118988	17	17	103	110	79	86	68	69	12	12	16	16	83	99	0	0	3	3	38	48	6	7	29	33	0	0	5	5	5
EP400	ENSG00000183495.14	chr12	+	132076515	132079096	ALJ	TRUE	0.000839719	2.30185e-06	[44, 49, 45, 53, 50, 10, 52, 60, 55, 25, 8, 65, 6, 24, 67, 71, 0, 11, 12, 16, 42, 88, 22, 69, 91, 54, 78, 142, 2, 9, 43, 66, 76, 79, 87, 94, 146, 17, 23, 57, 77, 102, 108, 121, 139, 141, 1, 30, 59, 61, 63, 72, 80, 89, 92, 93, 97, 98, 100, 101, 106, 117, 120, 128, 137, 144, 3, 4, 5, 13, 14, 15, 18, 19, 20, 21, 27, 28, 31, 32, 33, 34, 35, 37, 38, 39, 40, 41, 46, 48, 56, 62, 64, 68, 70, 73, 74, 83, …	[47, 51, 75, 81, 58, 96, 36, 7, 103, 82, 118]	0.925346	0.975155	0.0498091	0.0158536	0.00104231	0.115097	0.000377551	0.0630744	0.00451262	0	72	0	106	0	93	0	81	3	32	3	40	1	39	0	32	0	0	0	2	0	1	0	3	0	0	0	5	0
TBRG1	ENSG00000154144.13	chr11	+	124625903	124626472	3AS	TRUE	0.000840708	2.31494e-06	[0, 47, 56, 48, 40, 60, 37, 79, 63, 80, 102, 25, 45, 75, 89, 10, 15, 21, 23, 27, 36, 39, 62, 64, 67, 70, 88, 105, 108, 118, 119]	[20, 106, 95, 132, 31, 109, 111, 17, 50, 122]	0.405751	1	0.594249	0.244795	0.0361135	0		0.13174	0.0471985	3	3	1	13	0	13	5	18	2	6	0	5	0	9	0	4	1	1	3	3	0	3	1	3	0	0	0	1	0
CCDC18-AS1	ENSG00000223745.8	chr1	-	93337483	93338229	IR	TRUE	0.000865441	2.39373e-06	[47, 55, 149, 30, 415, 280, 804, 42, 171, 905, 658, 655, 1223, 1307, 496, 1139, 492, 930, 1215, 173, 263, 277, 1236, 1297, 379, 1132, 1157, 1255, 1267, 1318, 1366, 18, 29, 194, 202, 433, 439, 443, 548, 728, 854, 864, 889, 1092, 1095, 1228, 1280, 1310, 1320, 1376, 71, 214, 556, 569, 652, 766, 807, 822, 1043, 1087, 1091, 1128, 1135, 1140, 1153, 1159, 1175, 1245, 1247, 1278, 1313, 1322, 1327, 1331, …	[9, 16, 2, 150, 3, 148, 176, 215, 50, 10, 24, 21, 108, 247, 201, 169, 0, 276, 48, 285, 191, 368, 97, 207, 23, 378, 526, 575, 167, 208, 251, 296, 297, 49, 186, 244, 146, 292, 377, 38, 159, 349, 451, 143, 385, 550, 585, 209, 334, 408, 462, 552, 704, 1133, 1467, 88, 152, 153, 161, 234, 347, 441, 484, 543, 571, 630, 637, 57, 135, 306, 341, 419, 476, 491, 570, 934, 996, 22, 126, 127, 195, 246, 299, 33…	1	1	0	0.642955	0.0151715	0.933612	0.0012263	0.763254	0.0366833	165	299	195	312	300	421	125	298	157	228	106	130	81	116	82	129	3	4	0	3	5	8	7	7	1	1	0	0	4
DHX29	ENSG00000067248.10	chr5	-	55270487	55270577	3AS	TRUE	0.000891811	2.47768e-06	[1, 4, 25, 18, 2, 13, 3, 32, 0, 44, 69, 88, 96, 12, 5, 115, 28, 31, 119, 148, 68, 8, 10, 24, 134, 173, 21, 30, 65, 78, 157, 161, 9, 17, 61, 67, 99, 147, 151, 181, 188, 210, 45, 46, 86, 128, 235, 258, 50, 64, 73, 89, 149, 156, 168, 169, 204, 223, 242, 284, 291, 391, 429, 433, 19, 20, 22, 23, 35, 56, 62, 81, 95, 105, 118, 120, 129, 137, 146, 154, 163, 170, 176, 182, 183, 184, 186, 187, 192, 194, 20…	[6, 54, 58, 97, 362, 398, 76, 248, 252, 384, 263, 396, 399, 409, 413, 415, 37, 427, 48, 308, 321, 66, 80, 225, 102, 358, 113, 370, 372]	0.216593	0.126374	0.0902192	0.0883064	0.00403744	0.0145148	6.92526e-07	0.0533639	0.00330835	18	80	12	155	0	130	10	70	4	59	2	96	0	47	2	7	6	29	0	18	1	15	2	37	0	0	1	5	2
CD2BP2	ENSG00000169217.9	chr16	-	30350770	30353095	ALJ	TRUE	0.000904428	2.5239e-06	[10, 9, 13, 32, 12, 20, 15, 58, 19, 38, 63, 84, 31, 43, 25, 48, 83, 11, 49, 62, 76, 37, 40, 41, 44, 46, 51, 64, 73, 75, 77, 79, 80, 85, 0, 6, 7, 16, 18, 21, 22, 24, 26, 28, 29, 30, 33, 35, 45, 47, 52, 53, 56, 59, 60, 61, 65, 66, 67, 68, 69, 70, 71, 72, 74, 78, 86, 87, 88, 90, 91]	[1, 54, 2, 8, 34, 42, 82, 5, 23, 27, 50, 81, 3, 4, 14, 17, 36, 55, 57, 89, 92]	0.695238	0.065534	0.629704	0.387168	0.0495422	0.803441	0.0209009	0.602034	0.0761753	4	14	3	45	2	20	4	138	4	5	1	2	10	14	7	28	0	0	1	10	2	5	4	11	0	0	2	6	0
EFTUD2	ENSG00000108883.13	chr17	-	44852562	44853516	3AS	TRUE	0.00100102	2.81445e-06	[3, 24, 68, 218, 230, 133, 201, 268, 150, 177, 128, 13, 275, 276, 282, 158, 287, 290, 174, 182, 190, 198, 202, 203, 208, 209, 212, 341, 91, 222, 107, 253]	[58, 71, 64, 61, 1, 66, 331, 125, 264, 270, 351, 256, 258, 140, 274, 326, 72, 344, 103, 108, 121, 122]	0.992754	0.789474	0.20328	0.551891	0.0330198	0.0351795	0.000674446	0.305272	0.0886956	0	0	4	8	6	10	5	14	0	0	0	0	0	7	0	1	0	0	0	4	0	0	5	5	0	0	2	3	1
FASTKD1	ENSG00000138399.18	chr2	-	169531490	169537226	3AS	TRUE	0.00100102	2.81816e-06	[0, 4, 2, 5, 46, 13, 6, 14, 44, 202, 36, 39, 211, 3, 194, 96, 132, 72, 231, 9, 12, 22, 110, 204, 214, 48, 95, 178, 203, 209, 8, 21, 35, 37, 47, 89, 154, 198, 200, 201, 239, 10, 61, 112, 168, 199, 205, 258, 308, 374, 7, 20, 41, 42, 50, 54, 69, 79, 88, 92, 94, 135, 167, 177, 180, 182, 189, 195, 217, 219, 227, 238, 256, 273, 275, 299, 302, 309, 317, 323, 325, 11, 15, 19, 23, 33, 34, 43, 45, 49, 56, …	[53, 284, 124, 156, 137, 148, 282, 125, 128, 131, 151, 285, 319, 78, 334, 216, 235, 129, 134, 136, 266, 140, 272, 146, 150, 153, 155, 158, 159, 161, 288, 163, 164, 295, 298, 301, 179, 312, 315, 60, 329, 331, 76, 333, 213, 370, 381, 375, 126, 397, 398]	0.244579	1	0.755421	0.118076	0.014242	0.00642218	4.3465e-05	0.0575501	0.00945181	18	35	10	106	5	85	2	46	15	53	0	78	0	55	2	19	0	14	0	9	0	2	0	2	0	0	0	0	1
MED6	ENSG00000133997.12	chr14	-	70592988	70593295	3AS	FALSE	0.00100213	2.83366e-06	[0, 26, 35, 7, 9, 12, 76, 10, 38, 53, 59, 67, 11, 15, 43, 57, 58, 61, 68, 70, 73, 74, 75, 77, 78, 81, 86, 88, 92, 93]	[5, 65, 46, 90, 91]	0.140992	0.0238095	0.117183	0.195899	0.0135013	0.0144387	7.1502e-07	0.104697	0.013726	7	11	2	14	0	24	1	14	3	21	2	11	0	10	1	8	1	2	0	1	0	1	0	2	0	1	1	1	1
TRIP12	ENSG00000153827.14	chr2	-	229793130	229795178	3AS	TRUE	0.00102178	2.90185e-06	[15, 14, 177, 81, 58, 63, 82, 96, 105, 111, 167, 62, 101, 138, 298, 26, 125, 152, 381, 248, 77, 97, 102, 106, 108, 164, 207, 361, 362, 39, 68, 99, 140, 142, 147, 176, 210, 265, 278, 313, 363, 64, 66, 69, 79, 84, 87, 90, 104, 113, 115, 117, 120, 121, 130, 132, 150, 154, 156, 161, 162, 168, 169, 172, 173, 175, 178, 182, 188, 189, 190, 192, 193, 198, 199, 200, 202, 203, 205, 209, 213, 214, 217, 233,…	[17, 5, 40, 27, 35, 204, 0, 38, 249, 28, 3, 4, 234, 165, 7, 11, 143, 224, 37, 44, 59, 78, 22, 24, 76, 170, 215, 246, 254, 36, 65, 144, 183, 16, 30, 75, 94, 149, 197, 225, 276, 2, 21, 73, 126, 235, 277, 325, 1, 13, 20, 29, 32, 41, 42, 55, 56, 100, 103, 112, 133, 137, 166, 171, 181, 216, 223, 237, 245, 247, 260, 273, 274, 289, 291, 294, 305, 307, 311, 339, 344, 368, 401, 6, 8, 9, 10, 12, 18, 23, 25…	0.409231	0.316	0.0932308	0.572464	0.00937637	0.820864	0.00822234	0.696465	0.0239509	4	7	30	39	12	17	8	13	5	12	8	10	14	18	3	5	0	0	0	4	3	7	4	10	0	0	0	3	3
BNIP3	ENSG00000176171.11	chr10	-	131967686	131969332	ALJ	TRUE	0.00106179	3.02858e-06	[0, 2, 10, 8, 16, 1, 9, 11, 13, 18, 12, 17, 20, 5, 15, 19, 22, 3, 7, 21, 23, 24, 25, 26, 27, 28, 30, 31, 33, 34]	[4, 14, 32, 6, 29]	0.16426	0.0857143	0.0785456	0.0963918	7.02667e-06	0		0.0487358	0.00304141	1	11	1	6	0	11	1	16	0	9	0	11	0	13	1	17	0	1	0	6	0	0	15	139	0	0	0	0	2
IKZF5	ENSG00000095574.12	chr10	-	122994751	122995993	IR	TRUE	0.00106208	3.04255e-06	[17, 168, 166, 132, 137, 187, 170, 223, 131, 138, 46, 185, 196, 201, 205, 208, 219, 226, 234, 236, 125]	[12, 57, 37, 81, 78, 60, 63, 72, 102, 65, 34, 92, 75, 77, 66, 98, 106, 108, 110, 113, 119, 182, 184, 82, 89, 94, 229, 104, 105, 241, 245, 118, 123, 126]	0.0925926	0.185185	0.0925926	0.558698	0.0793296	0.977212	0.00161219	0.746634	0.0884506	5	7	15	16	56	56	11	19	10	20	1	1	8	8	0	1	0	0	6	27	10	13	3	21	0	0	0	1	2
PARG	ENSG00000227345.8	chr10	-	49934163	49941508	3AS	TRUE	0.00106858	3.07435e-06	[2, 1, 125, 128, 141, 151, 159, 88, 136, 139, 145, 23, 158, 34, 162, 165, 40, 171, 51, 180, 181, 186, 67, 72, 204, 77, 214, 89, 226, 111, 117, 253, 267]	[3, 30, 49, 184, 237, 82, 192, 199, 177, 247, 101, 235, 44, 178, 245, 86, 121, 31]	1	1	0	0.357244	0.0283406	0.0667067	5.29005e-06	0.217329	0.0325717	6	14	11	26	9	22	14	22	3	17	1	8	0	3	0	3	3	7	5	5	0	0	0	0	0	0	0	0	0
FASTKD2	ENSG00000118246.14	chr2	+	206767470	206770127	IR	TRUE	0.00109358	3.15977e-06	[47, 61, 223, 96, 36, 182, 241, 64, 325, 261, 284, 305, 322, 338, 217, 219, 220, 349, 350, 352, 228, 356, 358, 359, 240]	[17, 27, 4, 2, 20, 122, 35, 165, 69, 126, 239, 41, 49, 84, 231, 152, 169, 108, 125, 131, 134, 143, 44, 184, 192, 230, 105, 129, 140, 271, 283, 291, 37, 168, 45, 175, 177, 54, 63, 77, 213, 253, 227, 249, 235, 238, 112, 121, 123, 362]	1	0.653722	0.346278	0.657213	0.0397438	0.964224	0.00415932	0.801051	0.0523552	23	26	23	31	62	76	53	64	19	31	27	32	12	18	3	8	9	10	1	7	3	3	1	1	1	1	0	1	1
FIG4	ENSG00000112367.12	chr6	+	109735149	109738411	ALJ	TRUE	0.00111032	3.22186e-06	[1, 28, 0, 12, 22, 33, 39, 42, 66, 89, 310, 100, 8, 10, 43, 26, 50, 93, 7, 35, 110, 398, 253, 37, 117, 48, 9, 69, 86, 517, 141, 45, 58, 91, 54, 55, 72, 60, 102, 573, 19, 38, 68, 104, 194, 289, 67, 118, 130, 331, 23, 85, 92, 213, 343, 470, 14, 32, 49, 52, 111, 169, 200, 243, 254, 283, 406, 487, 581, 13, 96, 106, 107, 122, 134, 206, 248, 267, 306, 388, 392, 431, 463, 476, 479, 507, 512, 515, 535, 5…	[4, 88, 551, 73, 47, 229, 444, 576, 764, 806, 572, 449, 521, 696, 718, 244, 566, 477]	0.272909	0.0719101	0.200999	0.128173	0.00930861	0.0296491	0.000242271	0.066901	0.0035487	14	199	59	333	46	611	66	365	7	325	16	507	21	382	8	89	2	34	1	8	1	52	3	5	0	2	3	5	1
PNN	ENSG00000100941.9	chr14	+	39179462	39180514	IR	TRUE	0.00111691	3.25476e-06	[5, 212, 292, 262, 40, 105, 234, 272, 243, 307, 25, 90, 255]	[6, 14, 115, 69, 118, 127, 125, 136, 77, 97, 120, 71, 73, 226, 135, 15, 27, 66, 109, 293, 181, 138, 233, 142, 300, 187, 209, 219, 232, 123, 131, 132, 134, 149, 151, 156, 157, 158, 162, 163, 298, 301, 49, 315, 189, 318, 67, 68, 326, 200, 201, 205, 208, 253, 227, 100, 101, 102, 117, 249, 252]	0.0467836	0.103047	0.0562635	0.796237	0.0208134	0.986095	0.000256907	0.878214	0.0241451	47	53	81	92	220	240	85	114	33	46	33	42	74	79	16	21	1	2	11	14	32	33	14	21	0	0	0	0	21
ARHGAP25	ENSG00000163219.12	chr2	+	68787956	68806730	ES	TRUE	0.00121574	3.55778e-06	[133, 37, 116, 120, 131, 168, 86, 333, 177, 319, 74, 85, 1007, 371, 787, 668, 676, 934, 679, 321, 856, 483, 1025, 134, 1041, 663, 921, 414, 556, 301, 472, 986, 475, 604, 485, 489, 877, 372, 1015]	[498, 497, 641, 745, 780, 313, 764, 735, 750, 775, 790, 749, 892, 549, 184, 728, 509, 1030, 1045, 1057, 180, 830, 193, 198, 208, 979, 992, 997, 998, 871, 1005, 755, 1021]	1	1	0	0.449361	0.0485745	0.0400043	0.0033011	0.253054	0.0710885	4	6	3	5	2	46	44	104	5	11	1	5	7	30	0	1	0	0	0	0	5	8	7	11	0	0	6	6	3
INTS13	ENSG00000064102.15	chr12	-	26917441	26917643	3AS	TRUE	0.00121834	3.58044e-06	[0, 2, 43, 3, 114, 19, 13, 12, 49, 9, 14, 26, 28, 15, 51, 184, 17, 96, 21, 87, 115, 239, 33, 68, 111, 128, 143, 178, 225, 248, 272, 22, 30, 34, 38, 71, 123, 138, 141, 206, 216, 228, 247, 260, 5, 6, 24, 29, 76, 83, 85, 88, 97, 125, 134, 137, 139, 144, 145, 154, 163, 165, 168, 169, 174, 175, 193, 196, 200, 203, 214, 219, 221, 229, 236, 241, 252, 256, 264, 269, 273, 274, 302, 311, 1, 4, 7, 16, 20, 2…	[8, 64, 157, 162, 155, 75, 204, 180, 201, 110, 18, 149, 290, 40, 42, 305, 50, 313, 185, 60, 320, 321, 69, 73, 77, 205, 208, 211, 95, 98, 230, 106, 109]	0.199825	0.266667	0.0668412	0.107483	0.000266846	0.029486	0.000158789	0.0674616	0.0019835	1	40	4	37	3	38	9	36	5	25	4	55	2	30	2	18	1	22	1	34	0	10	4	38	0	0	0	7	2
MAP3K7	ENSG00000135341.18	chr6	-	90515109	90515907	3AS	TRUE	0.00126828	3.74285e-06	[43, 62, 64, 129, 308, 39, 312, 3, 255, 384, 272, 302, 307, 311, 315, 208, 115, 262, 397, 402, 275, 406, 412, 427, 45, 303, 48, 428, 51, 313, 316, 326, 327, 72, 73, 338, 366]	[9, 70, 130, 293, 133, 112, 145, 246, 160, 194, 227, 328, 171, 269, 244, 214, 189, 350]	1	1	0	0.188181	0.0165115	0.72892	0.0463996	0.396642	0.0885697	1	8	3	23	9	29	1	30	2	15	1	5	5	9	0	3	0	2	0	1	1	2	1	10	0	0	0	3	0
PRPF38A	ENSG00000134748.13	chr1	+	52414647	52414740	IR	TRUE	0.00136247	4.0398e-06	[6, 23, 25, 104, 43, 123, 122, 130, 100, 134, 158, 112, 21, 27, 30]	[11, 28, 55, 48, 61, 75, 33, 38, 85, 101, 121, 135, 19, 50, 53, 60, 62, 76, 78, 89, 96, 99, 114, 119, 167, 168]	0.078125	0.970149	0.892024	0.094809	0.00586745	0.40126	0.0194204	0.198294	0.0315285	4	39	4	40	3	35	20	56	4	20	3	12	4	19	3	15	0	18	1	24	2	16	0	23	0	0	0	12	2
FOXP1	ENSG00000114861.23	chr3	-	70968381	70970194	ALJ	TRUE	0.00136247	4.05447e-06	[187, 5, 48, 18, 98, 171, 9, 28, 33, 46, 25, 47, 17, 185, 15, 296, 128, 186, 243, 38, 220, 119, 259, 107, 69, 82, 52, 161, 263, 41, 293, 294, 235, 148, 158, 241, 29, 166, 208, 626, 153, 136, 150, 463, 586, 40, 163, 256, 257, 876, 6, 173, 177, 181, 210, 247, 347, 59, 160, 215, 306, 458, 512, 638, 7, 100, 120, 125, 162, 250, 401, 58, 238, 301, 377, 430, 433, 13, 44, 99, 149, 179, 192, 212, 396, 439…	[21, 582, 22, 583, 341, 298, 652, 729, 619, 628, 629, 648, 631, 286, 682, 285, 824, 580, 728, 733, 748, 760, 775, 23, 588, 730, 739, 742, 745, 622, 754, 755, 634, 761, 640, 641, 770, 644, 772, 646, 647, 774, 650, 651, 781, 909, 804, 805, 806, 808, 822, 823, 581, 860, 736, 737, 738, 740, 743, 618, 620, 627, 117, 632, 636, 766, 767]	0.458324	0.1375	0.320824	0.0724692	0.00703919	0.00164633	1.66509e-05	0.035934	0.0054816	22	143	72	294	21	230	135	588	14	153	28	124	2	131	4	99	1	7	0	22	0	22	4	49	0	5	0	15	0
TMCC2	ENSG00000133069.17	chr1	+	205271255	205271812	3AS	TRUE	0.00138056	4.12536e-06	[8, 9, 6, 28, 21, 19, 16, 23, 47, 62, 61, 7, 25, 32, 33, 37, 40, 57, 77, 81, 87, 1, 12, 13, 24, 31, 36, 41, 43, 45, 48, 58, 70, 73, 74, 86, 88, 95, 96, 107, 111]	[2, 10, 30, 34, 15, 97, 29, 46, 50, 52, 39, 76, 38, 51, 72, 85, 104, 3, 14, 35, 42, 56, 60, 64, 69, 71, 82, 84, 91, 92, 100, 101, 102, 106, 108, 109]	0.0459818	0.0434038	0.002578	0.41406	0.0131336	0.052414	5.813e-06	0.296953	0.0381669	0	0	0	0	0	0	0	0	0	0	0	0	0	0	0	0	0	0	4	6	1	1	60	142	0	0	1153	2504	1
EXOSC10	ENSG00000171824.14	chr1	-	11070973	11072086	3AS	FALSE	0.00138716	4.1622e-06	[1, 34, 13, 24, 2, 21, 20, 106, 71, 183, 33, 57, 30, 15, 53, 215, 39, 73, 10, 184, 27, 185, 26, 97, 19, 41, 195, 29, 186, 0, 234, 66, 189, 32, 331, 339, 8, 18, 49, 87, 249, 31, 40, 337, 38, 196, 220, 286, 110, 133, 212, 261, 36, 43, 136, 162, 190, 254, 37, 82, 170, 193, 218, 270, 316, 517, 145, 224, 236, 239, 246, 309, 311, 394, 419, 498, 81, 105, 107, 156, 173, 227, 250, 278, 356, 366, 371, 373,…	[3, 188, 109, 153, 64, 48, 152, 67, 263, 202, 532, 80, 35, 423, 42, 154, 233, 415, 587, 281, 347, 355, 380, 514, 515, 582, 95, 131, 158, 312, 401, 410, 431, 432, 439, 448, 510, 6, 528, 533, 23, 535, 538, 28, 541, 546, 548, 552, 553, 69, 600, 602, 604, 146, 155, 177, 205, 210, 211, 256, 266, 269, 291, 320, 321, 367, 369, 375, 382, 413, 425, 441, 454, 464, 470, 471, 476, 483, 486, 492, 506, 617]	0.472532	0.422709	0.0498236	0.104807	0.0011922	0.0490912	0.000228744	0.0786855	0.00153299	21	165	25	356	46	545	68	662	24	173	19	266	27	454	11	152	28	102	8	100	5	53	18	128	0	1	5	20	4
FCRL1	ENSG00000163534.15	chr1	-	157801591	157801914	IR	TRUE	0.00139979	4.21739e-06	[43, 262, 334, 381, 207, 524, 246, 373, 677, 232, 313, 756, 277, 227, 530, 537, 732, 552, 230, 275, 419, 38, 1136, 412, 130, 1225, 735, 256, 273, 276, 407, 98, 616, 1190, 701, 1240, 1256, 268, 360, 408, 444, 450, 456, 998, 1031, 523, 1082, 1092, 1098, 1107, 610, 1182, 1189, 681, 1229, 1234, 214, 731, 225, 1251, 1255, 1261, 1274, 264, 1287, 799, 1336, 323, 872, 406, 413, 1037, 527, 1039, 1049, 541…	[239, 71, 82, 430, 606, 371, 425, 439, 369, 658, 329, 349, 708, 410, 467, 471, 89, 280, 363, 440, 464, 596, 694, 301, 911, 933, 936, 1080, 599, 629, 691, 695, 1246, 1291, 308, 853, 855, 877, 880, 898, 927, 432, 478, 1005, 1038, 531, 538, 544, 1057, 546, 1102, 1128, 635, 123, 1150, 645, 1158, 654, 661, 664, 673, 682, 683, 686, 1208, 697, 702, 1219, 711, 716, 720, 734, 746, 754, 243, 755, 263, 270,…	1	0.996904	0.00309598	0.0459855	6.29069e-06	0.369351	0.0118438	0.188211	0.0321036	0	19	6	111	3	116	7	88	1	24	0	5	2	29	0	14	0	0	0	0	0	1	0	0	0	0	0	0	0
ARHGAP25	ENSG00000163219.12	chr2	+	68787956	68807272	ME	TRUE	0.00153969	4.67235e-06	[133, 116, 175, 131, 86, 115, 333, 741, 177, 319, 85, 371, 787, 668, 442, 321, 336, 1025, 134, 1041, 414, 556, 301, 440, 726, 472, 604, 485, 877, 751, 372, 1015]	[32, 248, 231, 33, 66, 166, 433, 167, 613, 672, 173, 740, 673, 709, 160, 619, 135, 685, 276, 792, 813, 614, 158, 688, 721, 754, 771, 789, 815, 689, 704, 233, 753, 777, 781, 277, 803, 824, 996, 1014, 1035, 1039, 530, 1055, 1056, 1058, 53, 566, 629, 634, 635, 651, 653, 654, 657, 658, 681, 692, 694, 182, 696, 699, 187, 707, 708, 710, 204, 724, 733, 743, 758, 762, 765, 768, 779, 782, 786, 791, 788, 8…	1	1	0	0.88626	0.0154343	0.374007	0.067372	0.692141	0.0932032	42	44	157	158	214	238	343	409	73	75	7	10	45	59	2	3	8	8	18	18	10	12	14	15	0	0	7	7	6
ARHGAP9	ENSG00000123329.20	chr12	-	57474968	57475290	IR	TRUE	0.00153969	4.67691e-06	[299, 146, 130, 136, 416, 315, 183, 356, 365, 381, 5, 637, 520, 654, 404, 26, 27, 540, 30, 287, 417, 291, 298, 696, 719, 465, 85, 727, 345, 349, 350, 351, 361, 374, 378]	[68, 91, 125, 104, 150, 681, 521, 168, 53, 595, 596, 88, 102, 112, 176, 456, 36, 57, 97, 118, 126, 144, 158, 688, 692, 547, 550, 41, 561, 51, 99, 103, 107, 116, 119, 121, 138, 143, 153, 184, 200, 217, 221, 231, 748, 266, 276, 286, 302, 323, 382, 472, 479, 487, 509, 512, 515, 517, 11, 12, 526, 527, 530, 532, 538, 541, 40, 47, 54, 577, 69, 582, 584, 89, 602, 604, 625, 634, 651, 657, 148, 149, 154, …	1	0.996078	0.00392157	0.496993	0.120304	0.9125	1.67865e-05	0.711793	0.0713962	0	0	0	8	0	2	6	14	0	0	0	0	8	14	0	1	0	1	11	13	0	0	3	3	0	0	4	6	0
AASDH	ENSG00000157426.14	chr4	-	56353596	56354038	3AS	TRUE	0.00155721	4.74936e-06	[1, 2, 13, 7, 3, 36, 56, 101, 74, 10, 27, 32, 43, 100, 31, 104, 85, 16, 113, 17, 82, 225, 70, 120, 25, 39, 128, 147, 168, 227, 5, 57, 200, 229, 254, 373, 26, 62, 93, 98, 133, 155, 157, 175, 329, 428, 12, 35, 42, 44, 92, 103, 135, 163, 179, 188, 202, 252, 276, 289, 295, 332, 365, 0, 29, 50, 64, 89, 99, 114, 121, 141, 154, 170, 174, 185, 211, 218, 231, 233, 238, 245, 258, 263, 293, 296, 300, 309, 3…	[21, 240, 139, 69, 22, 23, 410, 167, 47, 334, 342, 349, 149, 443, 457, 471, 374, 375, 376, 265, 411, 28, 30, 416, 38, 45, 46, 173, 49, 438, 66, 67, 68, 451, 459, 76, 80, 81, 338, 339, 468, 346, 219, 482, 485, 489, 493, 494, 239, 372, 117, 380, 381]	0.244769	1	0.755231	0.129372	0.00711685	0.0181132	0.000644399	0.0733385	0.00702504	5	75	8	66	2	72	12	47	4	73	0	91	2	46	3	16	2	17	0	3	0	2	4	18	0	0	0	1	1
KPNA1	ENSG00000114030.13	chr3	-	122433788	122442037	3AS	TRUE	0.00160041	4.90087e-06	[7, 417]	[21, 70, 253, 28, 333, 62, 64, 244, 256, 63, 206, 407, 322, 75, 80, 342, 225, 226, 373, 385, 406, 23, 24, 25, 420, 324, 338, 339, 340, 217, 99, 355, 357, 247, 248, 260, 261, 388, 389, 392, 265, 393, 396, 408, 29, 411, 412, 436, 437, 440, 57, 441, 315, 442, 443, 445, 67, 326, 79, 334, 335, 336, 85, 86, 343, 94, 227, 231, 359, 363, 236, 366, 367, 374, 250, 251]	0	1	1	0.966193	0.00328354	0.2017	0.103297	0.742637	0.133542	11	11	8	8	16	16	16	16	8	8	0	0	1	1	0	0	3	3	9	9	2	4	41	41	0	0	3	3	7
ARHGAP25	ENSG00000163219.12	chr2	+	68787956	68807272	ME	TRUE	0.00163652	5.03164e-06	[133, 116, 175, 131, 86, 115, 333, 741, 177, 319, 85, 371, 787, 668, 321, 336, 1025, 134, 1041, 414, 556, 301, 440, 726, 472, 604, 485, 877, 751, 372, 1015]	[32, 248, 231, 33, 66, 166, 433, 167, 613, 672, 173, 740, 673, 709, 160, 619, 135, 685, 276, 792, 813, 614, 158, 688, 721, 754, 771, 789, 815, 689, 704, 233, 753, 777, 781, 277, 803, 824, 442, 996, 1014, 1035, 1039, 530, 1055, 1056, 1058, 53, 566, 629, 634, 635, 651, 653, 654, 657, 658, 681, 692, 694, 182, 696, 699, 187, 707, 708, 710, 204, 724, 733, 743, 758, 762, 765, 768, 779, 782, 786, 791, 7…	1	1	0	0.886495	0.0153983	0.377422	0.0674084	0.693625	0.0924026	42	44	157	158	215	238	343	409	73	75	7	10	45	59	2	3	8	8	18	18	10	12	14	15	0	0	7	7	6
CDC27	ENSG00000004897.12	chr17	-	47138891	47142228	3AS	TRUE	0.00166357	5.13536e-06	[345, 107, 259, 243, 287, 491, 410, 412, 441, 584, 500, 104, 665, 795, 375, 508, 576, 583, 585, 594, 685, 689, 712, 713, 721, 396, 482, 495, 525, 683, 688, 254, 781, 783, 277, 281, 367, 904, 914, 428, 430, 433, 955, 957, 470, 517, 519, 528, 548, 553, 559, 560, 562, 572, 574, 580, 80, 611, 632, 638, 652, 653, 669, 673, 675, 676, 681, 684, 687, 691, 693, 697, 699, 706, 709, 714, 715, 204, 717, 718,…	[106, 100, 117, 114, 408, 145, 188, 447, 351, 514, 829, 215, 120, 758, 768, 770, 132, 901, 649, 138, 522, 785, 147, 148, 919, 798, 800, 804, 948, 953, 451, 452, 199, 839, 211, 854, 217, 476, 221, 865, 504, 492, 748, 374, 757, 121, 634, 637]	1	0.37415	0.62585	0.50455	0.0958855	0.0377798	5.38195e-06	0.332405	0.10327	8	8	4	12	7	17	1	9	2	6	0	3	1	3	0	1	5	6	3	4	1	6	3	80	0	0	1	2	10
ZNF493	ENSG00000196268.12	chr19	+	21397131	21397267	AFJ	TRUE	0.00170047	5.27025e-06	[27, 3, 25, 63, 13, 62, 44, 52, 57, 86, 87, 111, 21, 34, 38, 41, 50, 59, 83, 93, 108, 115, 117]	[0, 5, 2, 6, 4, 22, 7, 10, 8, 24, 31, 18, 19, 17, 58, 20, 68, 78, 12, 30, 32, 35, 40, 48, 51, 56, 60, 66, 77, 91, 92, 100, 106, 114, 1, 9, 11, 14, 15, 16, 23, 26, 28, 29, 33, 36, 37, 39, 42, 43, 45, 46, 47, 49, 53, 54, 55, 61, 64, 65, 67, 69, 70, 71, 72, 73, 74, 75, 76, 79, 80, 81, 82, 84, 85, 88, 89, 90, 94, 95, 96, 97, 98, 99, 101, 102, 103, 104, 105, 107, 109, 110, 112, 113, 116, 118, 119, 120]	0.610526	0.122586	0.48794	0.772559	0.0623444	0.932294	4.35885e-06	0.874734	0.0126617	37	40	64	69	94	97	49	54	47	47	69	74	37	38	9	11	7	7	4	4	1	1	0	3	1	3	0	0	2
ACSL1	ENSG00000151726.15	chr4	-	184775415	184776883	IR	TRUE	0.00174201	5.42053e-06	[219, 323, 191, 329, 460, 355, 271, 379, 306, 452, 315, 378, 424, 662, 844, 354, 380, 616, 630, 698, 708, 731, 740, 233, 319, 367, 445, 545, 555, 599, 608, 651, 672, 673, 678, 681, 692, 693, 697, 704, 706, 712, 718, 722, 725, 726, 728, 747, 236, 751, 241, 761, 770, 837, 327, 840, 869, 365, 893, 895, 434, 458, 462, 463, 464, 468, 470, 472, 476, 479, 480, 481, 485, 486, 487, 491, 493, 495, 497, 502]	[98, 413, 388, 393, 139, 848, 721, 503, 504, 89]	1	0.722222	0.277778	0.0405729	1.36409e-06	0.571428	0.244897	0.259663	0.117087	0	0	0	0	0	0	0	1	0	0	0	0	0	1	0	0	0	0	0	37	2	33	1	36	0	0	0	0	0
TBC1D15	ENSG00000121749.15	chr12	+	71921454	71922963	IR	TRUE	0.0017638	5.55366e-06	[27, 354, 361, 32, 352, 326, 57, 445, 350, 363, 411, 412, 413, 427, 61, 499, 384, 392, 395, 410, 418, 420, 425, 428, 436, 438, 329, 461, 334, 465, 469, 471, 474, 223, 225, 360, 497, 371, 380, 511]	[39, 19, 37, 99, 116, 151, 73, 216, 143, 203, 386, 261, 133, 142, 52, 182, 202, 212, 213, 218, 115]	0.410891	0.474747	0.0638564	0.3833	0.11921	1		0.588325	0.158606	10	14	2	2	4	4	3	3	11	23	4	4	3	3	1	1	2	7	0	11	1	2	2	25	0	1	0	5	1
HIF1A	ENSG00000100644.17	chr14	+	61695839	61720381	3AS	FALSE	0.0017638	5.54961e-06	[0, 5, 3, 66, 6, 97, 13, 62, 60, 171, 58, 44, 56, 105, 19, 26, 132, 24, 304, 73, 153, 55, 194, 462, 204, 420, 125, 137, 53, 684, 52, 196, 761, 34, 295, 345, 197, 71, 106, 47, 117, 156, 249, 421, 483, 15, 207, 80, 116, 18, 78, 246, 774, 8, 74, 159, 183, 199, 219, 349, 382, 41, 111, 133, 228, 289, 439, 465, 467, 645, 800, 818, 64, 94, 177, 214, 237, 280, 326, 480, 633, 711, 815, 836, 12, 32, 40, 49…	[1, 7, 23, 14, 59, 192, 92, 160, 300, 127, 181, 31, 168, 95, 383, 530, 21, 408, 518, 20, 443, 507, 522, 208, 264, 474, 87, 46, 83, 281, 57, 376, 200, 291, 81, 224, 235, 975, 992, 85, 96, 119, 155, 425, 460, 796, 937, 93, 141, 285, 319, 357, 363, 998, 1056, 203, 341, 516, 525, 184, 191, 355, 370, 594, 760, 779, 790, 963, 185, 213, 236, 271, 288, 344, 470, 506, 509, 648, 678, 764, 939, 983, 1028, 1…	0.113295	0.122855	0.00956001	0.359284	0.0111585	0.311621	0.000827392	0.336832	0.00656811	121	378	168	644	664	2061	163	490	491	1429	44	191	238	759	12	38	128	274	223	688	163	504	1076	3569	0	0	69	127	212
C1D	ENSG00000197223.12	chr2	-	68047319	68062957	3AS	TRUE	0.0017638	5.51762e-06	[0, 16, 7, 18, 24, 3, 40, 56, 32, 67, 39, 44, 48, 57]	[5, 36, 26, 63, 34, 61]	0.0520646	0.0779221	0.0258574	0.209022	0.00353113	0.011395	0.000142229	0.0938404	0.0123433	2	7	0	5	0	5	1	2	1	9	0	4	0	4	0	2	0	3	1	5	1	6	2	10	44	134	0	1	7
ELF1	ENSG00000120690.16	chr13	-	40949925	40951328	IR	TRUE	0.00180638	5.71003e-06	[72, 207, 57, 644, 180, 592, 647, 688, 79, 641, 642, 837, 331, 600, 1030, 664, 667, 687, 695, 953, 707, 838, 591, 980, 865, 878, 1018, 1023]	[73, 144, 269, 175, 328, 80, 670, 288, 755, 539, 541, 303, 368, 256, 391, 909, 912, 540, 33, 677, 426, 554, 696, 574, 704, 449, 577, 589, 624, 631, 632, 1036]	0.0701754	0.968	0.897825	0.205792	0.0247064	0.671506	0.00321472	0.380878	0.07317	3	20	4	9	34	98	6	13	3	24	0	2	3	6	0	2	0	4	0	21	2	6	0	3	0	0	0	1	0
CPSF3	ENSG00000119203.14	chr2	+	9440666	9441534	IR	TRUE	0.00183045	5.81375e-06	[27, 53, 183, 250, 261, 157, 166, 262, 179, 257, 263, 265, 266, 267, 269, 271, 273, 276, 278, 152, 170, 173, 180, 181, 189, 192, 194, 69, 197, 200, 94, 232, 244, 246, 119, 248]	[0, 41, 55, 59, 58, 28, 61, 71, 66, 36, 52, 33, 54, 140, 57, 80, 68, 81, 147, 17, 62, 141, 165, 9, 51, 74, 88, 5, 48, 50, 83, 87, 108, 120, 128, 130, 142, 178, 198, 217, 264, 26, 40, 42, 44, 70, 73, 84, 89, 95, 109, 111, 112, 113, 116, 117, 123, 126, 131, 132, 136, 137, 143, 145, 146, 148, 149, 150, 153, 154, 156, 158, 159, 167, 171, 172, 177, 182, 184, 185, 187, 188, 191, 193, 195, 201, 202, 206…	1	0.990497	0.00950292	0.779516	0.0666752	0.953383	6.21969e-06	0.854419	0.0313421	52	52	70	76	85	88	34	34	97	106	300	358	56	57	1	1	5	6	0	0	1	3	3	7	0	0	0	0	1
FOXP1	ENSG00000114861.23	chr3	-	70970183	70970735	IR	TRUE	0.00183045	5.85405e-06	[296, 626, 586, 512, 638, 34, 763, 584, 681, 732, 735, 623, 756, 765, 927, 686, 585, 607, 621, 749, 630, 633, 769, 771, 645, 778, 780, 683, 819, 828, 594, 726, 857, 734, 741, 752, 758, 635]	[98, 9, 25, 243, 38, 293, 294, 158, 153, 210, 247, 347, 160, 458, 430, 99, 39, 290, 338, 425, 744, 248, 292, 428, 154, 249, 764, 773, 287, 288, 291, 297, 839, 337, 340, 388, 431, 3, 24, 617, 159, 684, 685, 211, 746, 747, 759, 757, 807, 826, 842, 844, 335, 342, 348, 390, 426, 427, 429, 980, 483, 485, 513, 19, 20, 559, 560, 57, 74, 75, 587, 624, 625, 116, 118, 637, 639, 642, 643, 649, 151, 152, 155…	0.144578	0.392086	0.247508	0.806503	0.020278	0.995178	4.00284e-08	0.907759	0.0216087	45	61	55	77	57	70	105	193	31	40	24	32	50	50	18	20	0	0	0	0	2	2	2	5	1	1	0	0	1
SEPSECS	ENSG00000109618.12	chr4	-	25156974	25158952	3AS	TRUE	0.00183045	5.86079e-06	[0, 4, 6, 3, 28, 2, 26, 34, 33, 27, 43, 5, 10, 12, 82, 87, 107, 39, 56, 63, 66, 84, 89, 92, 122, 7, 13, 14, 25, 36, 38, 42, 48, 49, 54, 55, 61, 65, 69, 71, 73, 74, 79, 86, 91, 93, 94, 95, 96, 98, 99, 102, 103, 115, 119, 121, 123, 127, 128]	[17, 21, 29, 18, 19, 20, 30, 46, 50, 78, 22, 23, 24, 41, 44, 47, 80, 85, 106, 108, 114]	0.409412	0.965116	0.555705	0.30759	0.0621563	0.019502	0.000390074	0.159904	0.0507303	6	6	2	14	1	12	0	14	6	18	0	18	0	14	0	5	1	4	3	3	1	3	2	7	0	0	2	3	0
TBRG1	ENSG00000154144.13	chr11	+	124625903	124626459	IR	TRUE	0.00183045	5.87653e-06	[20, 106, 95, 132, 31, 109, 111, 17, 50, 122]	[5, 29, 16, 6, 22, 94, 69, 71, 72, 74, 32, 44, 81, 114, 26]	1	1	0	0.602862	0.0945392	1		0.785865	0.0979246	0	3	14	15	7	7	15	20	2	4	1	1	8	8	2	2	0	1	0	3	0	0	0	1	0	0	0	0	0
ARHGAP25	ENSG00000163219.12	chr2	+	68787956	68807272	ME	TRUE	0.00183279	5.91516e-06	[133, 116, 175, 131, 86, 115, 333, 741, 177, 319, 85, 371, 787, 668, 442, 321, 336, 1025, 134, 1039, 1041, 414, 556, 301, 440, 726, 472, 604, 485, 877, 751, 372, 1015]	[32, 248, 231, 33, 66, 166, 433, 167, 613, 672, 173, 740, 673, 709, 160, 619, 135, 685, 276, 792, 813, 614, 158, 688, 721, 754, 771, 789, 815, 689, 704, 233, 753, 777, 781, 277, 803, 824, 996, 1014, 1035, 530, 1055, 1056, 1058, 53, 566, 629, 634, 635, 651, 653, 654, 657, 658, 681, 692, 694, 182, 696, 699, 187, 707, 708, 710, 204, 724, 733, 743, 758, 762, 765, 768, 779, 782, 786, 791, 788, 804, 80…	1	1	0	0.884205	0.0164626	0.374007	0.067372	0.691546	0.0935373	42	44	157	158	214	238	343	409	73	75	7	10	45	59	2	3	8	8	18	18	10	12	14	15	0	0	7	7	6
RPL27A	ENSG00000166441.13	chr11	+	8683265	8683989	IR	TRUE	0.00183279	5.9293e-06	[23, 27, 22, 45, 110, 111, 115, 117, 28]	[2, 3, 11, 47, 8, 61, 1, 81, 32, 64, 44, 53, 119, 121, 95]	0.118644	0.00740741	0.111237	0.790344	0.04291	0.993003	0.00129412	0.892678	0.032888	4	5	43	44	75	79	50	50	11	13	5	5	46	49	16	17	3	3	3	4	5	5	8	9	5	15	0	0	6
PRPF38B	ENSG00000134186.12	chr1	+	108692867	108693571	IR	TRUE	0.00183823	5.96962e-06	[33, 171, 95, 165, 299, 66, 90, 302, 318, 393, 269, 335, 314, 329, 300, 305, 401, 293, 295, 298, 307, 274, 409, 311, 325, 199, 334, 81, 337, 345, 359]	[210, 56, 73, 119, 271, 113, 141, 135, 78, 80, 129, 59, 225, 371, 143, 144, 146, 26, 207, 233, 123, 253]	1	0.859155	0.140845	0.17133	0.0513619	0.79161	0.0142731	0.402095	0.129566	0	1	2	26	3	29	0	39	0	2	0	0	1	11	0	0	0	2	0	3	0	0	0	4	0	0	0	3	0
EIF3E	ENSG00000104408.11	chr8	-	108203138	108203400	IR	TRUE	0.0018825	6.13663e-06	[26, 309, 212, 343, 201, 347, 43, 56, 95, 148, 32, 34, 164, 180, 181, 311, 200, 208, 213, 341, 219, 348, 349, 353, 355, 228, 360, 362, 363, 123]	[53, 1, 72, 35, 6, 82, 121, 153, 128, 33, 79, 85, 92, 101, 124, 137, 29, 94, 129, 131, 132, 257, 140, 143, 18, 147, 150, 151, 152, 154, 155, 156, 159, 160, 289, 163, 166, 183, 60, 199, 75, 333, 78, 211, 84, 342, 91, 93, 98, 227, 229, 120, 127]	0.991914	0.738532	0.253382	0.282351	0.0770281	0.845796	0.0482352	0.537912	0.145776	3	20	3	6	7	16	10	29	14	35	13	15	6	7	5	8	1	3	0	34	0	8	0	18	1	1	0	4	1
MMS19	ENSG00000155229.21	chr10	-	97459475	97459658	3AS	TRUE	0.00188714	6.17503e-06	[78, 94, 325, 162, 183, 737, 774, 791, 783, 170, 766, 132, 781, 788, 674, 181, 71, 77, 734, 740, 364, 763, 391, 778, 395, 396, 397, 782, 147, 787, 533, 151, 800, 418, 422, 808, 428, 816, 435, 187, 318, 446, 198, 201, 459, 207, 208, 463, 218, 219, 732, 478, 98, 738, 864, 743, 108, 748, 751, 113, 882, 757, 121, 378, 892, 893]	[0, 4, 1, 46, 40, 9, 3, 32, 31, 206, 216, 163, 58, 44, 133, 41, 55, 11, 60, 278, 362, 120, 56, 142, 369, 412, 49, 169, 93, 341, 523, 8, 195, 235, 273, 299, 824, 42, 73, 332, 371, 519, 47, 116, 119, 276, 330, 370, 415, 517, 520, 553, 27, 29, 43, 144, 154, 156, 204, 257, 311, 381, 453, 516, 609, 827, 25, 45, 90, 114, 126, 164, 185, 192, 248, 258, 351, 380, 429, 452, 454, 509, 510, 512, 539, 558, 60…	0.486486	0.472371	0.0141152	0.88204	0.00626272	0.990533	7.03193e-05	0.94138	0.00703862	1	1	68	84	20	27	79	119	2	2	0	0	47	52	1	1	0	0	22	24	3	3	7	7	0	0	7	7	1
SNRPN	ENSG00000128739.23	chr15	+	24968082	24974386	3AS	FALSE	0.00194925	6.42642e-06	[13, 5, 111, 100, 153, 164, 4, 8, 165, 167, 178, 180, 82, 83, 86, 87, 92, 94, 98, 109, 114, 119, 122]	[0, 6, 15, 23, 12, 40, 21, 3, 51, 11, 25, 26, 54, 44, 108, 39, 101, 112, 20, 34, 35, 36, 43, 47, 48, 58, 75, 79, 115, 152, 163, 176, 16, 17, 19, 24, 30, 31, 32, 37, 50, 53, 55, 56, 59, 61, 64, 65, 66, 67, 70, 72, 73, 76, 77, 78, 81, 89, 91, 93, 102, 104, 105, 113, 116, 117, 120, 121, 123, 124, 126, 128, 129, 130, 137, 138, 140, 142, 143, 144, 145, 146, 147, 148, 150, 151, 157, 159, 171, 172, 173,…	0.478632	0.198243	0.280389	0.861092	0.00841257	0.983793	0.000561228	0.922377	0.0092647	23	29	42	51	38	44	92	118	86	95	126	128	125	131	118	122	20	30	9	15	49	53	3	3	0	0	3	3	13
SLC4A1AP	ENSG00000163798.13	chr2	+	27688020	27688680	IR	TRUE	0.00194925	6.41902e-06	[16, 168, 131, 167, 145, 48, 219, 228, 236, 177, 243, 149, 214, 245, 220, 158]	[5, 10, 1, 23, 14, 36, 45, 115, 81, 154, 62, 87, 25, 41, 43, 70, 15, 24, 56, 73, 74, 151, 152, 69, 216, 90, 121, 109, 116, 119, 132, 135, 7, 139, 143, 18, 146, 147, 21, 28, 29, 156, 157, 160, 162, 37, 38, 39, 42, 171, 50, 53, 55, 64, 68, 200, 77, 85, 213, 92, 93, 222, 98, 100, 103, 105, 233, 107, 239, 122, 249]	1	1	0	0.721884	0.073208	0.997241	7.70743e-08	0.832014	0.0586981	81	92	209	214	142	149	151	163	82	101	27	28	43	44	38	41	9	17	2	4	2	4	3	7	0	0	0	0	1
NDUFAF5	ENSG00000101247.18	chr20	+	13786608	13787177	IR	TRUE	0.00196891	6.51555e-06	[109, 318, 224, 406, 162, 4, 383, 199, 376, 378, 254, 386, 413, 416, 295, 193, 214, 347, 351, 127, 384, 382, 389, 265, 267, 398, 272, 401, 404, 409, 411, 412, 417, 420, 422, 42, 170, 427, 173, 432, 434, 435, 436, 312, 445, 190, 447, 200, 343, 226, 356, 230, 233, 364, 366, 377, 381]	[0, 1, 3, 121, 22, 7, 77, 124, 6, 81, 139, 152, 175, 114, 221, 86, 103, 119, 13, 107, 161, 237, 92, 147, 178, 315, 49, 89, 138, 145, 159, 174, 215, 249, 15, 111, 117, 125, 222, 261, 269, 128, 196, 201, 266, 273, 5, 53, 62, 87, 106, 115, 134, 141, 158, 197, 231, 235, 250, 253, 296, 334, 367, 373, 18, 21, 47, 67, 82, 91, 105, 136, 148, 153, 160, 166, 189, 192, 194, 202, 203, 207, 210, 212, 234, 243…	1	0.999073	0.000926784	0.78623	0.0344294	0.961759	1.13754e-06	0.870497	0.0176834	10	11	41	41	117	124	70	75	25	25	26	30	64	68	2	3	2	2	7	9	4	7	23	33	0	0	5	8	13
CCDC66	ENSG00000180376.17	chr3	+	56615272	56615921	3AS	TRUE	0.0020201	6.70988e-06	[0, 29, 209, 180, 6, 27, 101, 102, 9, 30, 96, 98, 181, 593, 2, 95, 126, 165, 219, 193, 199, 229, 367, 657, 24, 41, 297, 312, 359, 480, 595, 20, 23, 104, 166, 171, 177, 198, 228, 237, 255, 261, 266, 299, 346, 371, 377, 406, 418, 419, 450, 464, 592, 643, 726, 16, 25, 31, 90, 114, 168, 174, 185, 230, 232, 236, 239, 252, 257, 260, 274, 275, 290, 296, 307, 311, 326, 351, 363, 389, 394, 397, 402, 412, …	[14, 33, 36, 38, 539, 72, 543, 70, 146, 674, 220, 522, 35, 40, 54, 578, 77, 121, 651, 145, 156, 158, 681, 701, 764, 768, 276, 415, 459, 478, 496, 500, 511, 512, 519, 523, 13, 22, 37, 552, 43, 44, 48, 56, 58, 59, 62, 63, 65, 68, 69, 582, 75, 76, 78, 79, 83, 84, 85, 599, 604, 605, 612, 621, 117, 123, 124, 638, 128, 129, 642, 135, 648, 138, 653, 142, 659, 661, 150, 663, 666, 671, 161, 673, 163, 678,…	0.713918	0.655022	0.0588957	0.324451	0.0368623	0.0618275	0.00260019	0.198388	0.0378326	5	25	16	41	5	32	6	18	8	24	5	38	0	23	3	10	1	5	0	2	0	7	2	3	1	6	0	2	6
ERGIC3	ENSG00000125991.20	chr20	+	35556271	35556954	IR	TRUE	0.00202022	6.73524e-06	[9, 21, 68, 71, 60, 92, 84, 87, 90, 59, 28, 94]	[1, 12, 4, 13, 35, 73, 74, 81, 85, 88, 96, 3, 5, 8, 18, 20, 25, 31, 32, 34, 41, 48, 76, 77, 79, 97, 104]	0.0606061	1	0.939394	0.265188	0.0689429	0.89633	6.12839e-05	0.483073	0.137836	0	6	1	7	1	4	10	17	0	11	0	1	3	3	1	15	0	8	2	16	1	8	1	6	0	0	0	10	0
COASY	ENSG00000068120.15	chr17	+	42562219	42562611	3AS	FALSE	0.00208266	6.98414e-06	[5, 26, 47, 94, 55, 36, 81, 131, 134, 143, 144, 17, 27, 34, 43, 53, 61, 79, 84, 85, 87, 88, 104, 105]	[7, 60, 42, 71, 35, 128, 98, 70, 75, 77, 141, 48, 54, 56]	0.169118	0.132743	0.0363743	0.626433	0.0341452	0.0993197	0.00485541	0.344295	0.0866675	0	0	2	2	0	0	1	4	0	0	0	0	1	8	0	0	0	0	13	18	0	1	2	4	0	0	2	2	0
NUCB2	ENSG00000070081.17	chr11	+	17295467	17296049	3AS	TRUE	0.00208266	6.99483e-06	[162, 158, 437, 258, 458, 299, 182, 121, 474, 28]	[31, 90, 79, 341, 43, 333, 411, 78, 392, 414, 427, 72, 328, 457, 77, 356, 491, 370, 375, 505, 514, 387, 404, 409, 415, 418, 35, 419, 420, 38, 166, 421, 422, 42, 446, 325, 326, 327, 462, 338, 465, 343, 472, 348, 478, 479, 352, 480, 487, 361, 492, 499, 501, 381, 382]	0.0714286	1	0.928571	0.925027	4.11583e-06	0.235317	0.000103213	0.749812	0.0657939	0	0	0	0	0	0	1	1	0	0	0	0	0	0	0	0	8	8	21	21	1	1	2	3	78	85	0	1	5
ZC3H11A	ENSG00000058673.17	chr1	+	203796496	203802568	3AS	TRUE	0.00216733	7.31705e-06	[307, 94, 690, 810, 290, 260, 679, 683, 302, 723, 278, 764]	[4, 0, 72, 99, 53, 2, 42, 97, 216, 17, 189, 523, 148, 425, 51, 438, 215, 104, 114, 392, 649, 530, 448, 75, 642, 387, 389, 265, 12, 524, 532, 538, 154, 413, 170, 430, 50, 180, 566, 705, 449, 331, 460, 87, 730, 604, 225, 377, 488, 489, 242, 504, 249, 812, 813, 814]	1	1	0	0.68367	0.0656492	0.983925	0.000393026	0.841549	0.051142	11	17	27	29	10	11	10	18	1	1	6	8	6	6	0	0	1	1	0	0	0	0	1	10	0	0	0	2	1
CASD1	ENSG00000127995.17	chr7	+	94528250	94533204	3AS	TRUE	0.00216733	7.35622e-06	[2, 36, 12, 26, 39, 4, 7, 15, 32, 42, 92, 34, 49, 50, 73, 1, 3, 5, 6, 8, 9, 10, 11, 13, 17, 19, 25, 31, 35, 38, 40, 41, 43, 45, 54, 55, 57, 58, 60, 61, 63, 64, 66, 71, 77, 83, 85, 89, 93, 99]	[22, 68, 94, 72, 24, 67, 70, 14, 79, 16, 80, 84, 21, 87]	0.372222	1	0.627778	0.393224	0.090071	0		0.169862	0.0822193	6	6	6	12	0	8	4	5	3	7	2	9	0	6	0	1	0	0	3	3	0	0	0	0	0	0	0	0	0
FASTKD1	ENSG00000138399.18	chr2	-	169531490	169537230	IR	TRUE	0.00216733	7.35949e-06	[1, 157, 212, 108, 265, 16, 18, 290, 300, 193, 206, 343, 229, 363, 364, 240, 241, 250, 251, 380]	[53, 284, 124, 156, 137, 148, 282, 125, 128, 131, 151, 285, 319, 78, 334, 216, 235, 129, 134, 136, 266, 140, 272, 146, 150, 153, 155, 158, 159, 161, 288, 163, 164, 295, 298, 301, 179, 312, 315, 60, 329, 331, 76, 333, 213, 352, 370, 375, 381, 126, 397, 398]	1	1	0	0.857797	0.018182	0.194122	0.0216554	0.526369	0.132577	18	19	10	13	5	7	2	2	15	15	0	1	0	2	3	3	0	1	0	0	0	0	0	0	0	0	0	0	1
MYNN	ENSG00000085274.16	chr3	+	169774431	169778767	IR	TRUE	0.00226622	7.72328e-06	[21, 9, 108, 67, 139, 13, 55, 186, 127, 74, 126, 151, 279, 156, 162, 189, 203, 114, 244, 262, 270, 273, 36, 297, 299, 301, 302, 190, 63, 204, 212, 217, 227, 236, 252, 314]	[178, 198, 31, 193, 259, 68, 69, 232, 45, 269, 177, 119, 184, 154]	0.995763	1	0.00423729	0.22924	0.00199199	0.0244141	1.70108e-06	0.138468	0.013085	2	9	3	12	3	6	3	20	2	6	0	6	0	7	2	3	0	4	4	8	0	5	4	18	0	0	0	0	1
TMX3	ENSG00000166479.10	chr18	-	68687765	68691294	ME	TRUE	0.00232836	7.9638e-06	[129, 15, 132, 166, 64, 164, 190, 237, 110, 157, 205, 230, 539, 294, 322, 201, 207, 382, 523, 280, 546, 291, 295, 308, 310, 312, 313, 216, 356, 121, 133, 519, 137, 268, 269, 526, 271, 532, 281, 282, 541, 413, 551, 298, 299, 555, 559, 432, 561, 562, 566, 314, 569, 444, 318, 321, 326, 329, 330, 460, 208, 217, 349, 481, 488, 233, 490, 107, 244, 245, 502, 247]	[28, 22, 381, 311, 101, 135, 405, 348, 116, 531, 23, 33, 420, 42, 44, 309, 438, 446, 582, 583, 585, 204, 83, 345, 346, 94, 352, 108, 112, 368, 506]	1	0.984615	0.0153846	0.442475	0.0935148	0.0577346	2.18456e-05	0.267871	0.0717507	1	6	10	14	2	17	2	3	4	10	5	15	3	6	2	2	1	5	0	0	0	0	0	3	0	0	0	0	0
TPT1	ENSG00000133112.17	chr13	-	45337403	45338659	IR	TRUE	0.00238081	8.17258e-06	[26, 227, 72, 235, 286, 256, 130, 229, 236, 210, 213, 121, 223]	[3, 5, 8, 9, 17, 40, 32, 13, 62, 28, 65, 57, 58, 59, 74, 39, 50, 22, 37, 67, 43, 46, 47, 76, 80, 75, 146, 34, 193, 79, 111, 112, 118, 119, 127, 289]	0.0361991	0.119914	0.0837153	0.699794	0.0614282	0.953488	0.0114666	0.818384	0.0576406	71	77	107	109	129	130	61	66	59	66	10	10	157	159	8	16	5	14	9	24	23	40	17	42	3	4	13	40	13
GTF3C2	ENSG00000115207.13	chr2	-	27343578	27356738	ES	FALSE	0.00242174	8.343e-06	[4, 5, 36, 16, 25, 19, 6, 171, 22, 73, 175, 183, 94, 197, 43, 207, 35, 86, 89, 118, 192, 119, 127, 158, 179, 241, 34, 48, 70, 107, 178, 247, 44, 52, 135, 137, 144, 162, 185, 188, 201, 215, 261, 262, 13, 42, 53, 60, 68, 75, 97, 105, 122, 128, 130, 140, 153, 163, 166, 172, 180, 184, 187, 189, 198, 199, 200, 204, 206, 209, 210, 214, 227, 235, 236, 242, 248, 258, 260, 263, 270, 272, 278, 292, 293, 29…	[2, 9, 31, 37, 40, 54, 149, 104, 29, 159, 165, 328, 56, 58, 96, 295, 301, 21, 12, 62, 63, 65, 84, 88, 95, 224, 274, 279, 311, 315, 319, 11, 23, 74, 77, 79, 80, 91, 98, 99, 102, 108, 117, 131, 133, 136, 138, 141, 150, 156, 161, 168, 191, 212, 213, 237, 238, 240, 252, 259, 266, 269, 280, 281, 284, 286, 299, 303, 305, 306, 310, 316, 320, 327, 332, 334, 337, 341]	0.282212	0.194882	0.0873299	0.302766	0.00101932	0.143308	0.00297227	0.218005	0.00970489	3	3	4	18	4	23	15	60	1	1	0	0	16	70	0	0	0	0	18	38	1	3	5	11	0	0	0	2	1
NAIP	ENSG00000278613.4	GL339449.2	+	424084	426856	3AS	TRUE	0.00253204	8.76504e-06	[1, 17, 23, 26, 29, 34, 38, 24, 36, 40, 42, 83, 31, 57, 11, 15, 16, 19, 20, 33, 39, 61, 65, 66, 70, 71, 73, 74, 75, 76, 78, 79, 84, 86, 88, 90, 91]	[9, 14, 27, 52, 60, 10, 30, 51, 53, 59, 2, 4, 41, 45, 46, 48, 62, 68, 87]	0.183432	0.279412	0.0959798	0.0849227	3.21079e-05	0.612048	0.0530804	0.331931	0.071316	1	1	0	3	0	7	0	1	0	0	0	1	0	0	0	0	2	14	0	4	4	52	0	0	0	0	0	1	0
SUN1	ENSG00000164828.18	chr7	+	849603	849840	IR	TRUE	0.00253204	8.7855e-06	[238, 116, 252, 244, 292, 258, 802, 739, 229, 746, 636, 257, 793, 794, 688, 823, 698, 717, 736, 124, 755]	[34, 54, 12, 87, 0, 279, 316, 325, 101, 111, 382, 46, 31, 19, 44, 168, 170, 92, 352, 360, 179, 245, 132, 163, 265, 332, 337, 387, 392, 269, 388, 446, 473, 533, 48, 570, 571, 178, 738, 233, 763, 508, 51, 582, 627, 630, 127, 645, 670, 184, 190, 211, 735, 228, 742, 256, 771, 780, 353, 375, 380, 424, 444, 458, 478, 490, 505, 513, 518, 524, 20, 22, 548, 37, 550, 562, 52, 573, 579, 583, 76, 77, 81, 600…	1	0.932508	0.0674916	0.809113	0.00641118	0.98694	8.31056e-05	0.925022	0.011196	0	0	29	47	20	26	54	73	1	1	0	0	32	38	0	0	0	0	0	0	0	0	0	1	0	0	0	0	0
CITED2	ENSG00000164442.10	chr6	-	139374412	139374647	AFJ	TRUE	0.00257138	8.95375e-06	[1, 11, 25, 3, 4, 13, 14, 22, 24, 27, 30, 35, 46, 49, 50, 56, 64]	[0, 6, 34, 23, 9, 16, 33, 52, 7, 8, 21, 55, 2, 26, 58, 60, 61, 75, 5, 10, 12, 15, 17, 18, 19, 20, 28, 29, 31, 32, 36, 37, 38, 39, 40, 41, 42, 43, 44, 45, 47, 48, 51, 53, 54, 57, 59, 62, 63, 65, 66, 67, 68, 69, 70, 71, 72, 73, 76]	0.022792	0.00273973	0.0200523	0.940178	0.000394605	0.786857	0.0618348	0.857108	0.0251509	5	5	14	15	25	26	26	26	199	216	4	5	59	65	8	8	22	23	681	703	107	112	429	449	0	4	180	187	133
ZNF671	ENSG00000083814.13	chr19	-	57722422	57723213	IR	TRUE	0.00260546	9.13278e-06	[7, 39, 43, 45, 18, 55, 40, 42, 47, 50, 51, 58]	[1, 5, 20, 35, 41, 32, 38, 8, 48, 21, 30]	0.918605	0.756757	0.161848	0.362328	0.0709389	0.936124	1.79895e-05	0.571218	0.120151	6	8	6	9	20	35	7	24	0	6	0	4	7	14	0	6	0	1	0	3	0	0	2	2	0	0	0	2	0
DNAJA2	ENSG00000069345.12	chr16	-	46955622	46957006	IR	TRUE	0.00260546	9.13677e-06	[4, 68, 57, 77, 41, 133, 166, 72, 122, 132, 143, 126, 140, 153, 176, 190, 67, 127, 128, 134, 8, 135, 138, 139, 141, 142, 145, 150, 156, 163, 167, 169, 44, 47, 175, 177, 178, 179, 183, 187, 189, 202, 203, 207, 123]	[5, 35, 58, 107, 50, 83, 144, 102, 11, 12, 30, 60, 103, 108, 7, 18, 20, 149, 42, 46, 48, 69, 71, 82, 95, 96, 97, 104, 209]	0.427152	0.711111	0.283959	0.121494	0.00626357	0.546575	0.0402975	0.280754	0.0591546	4	17	1	13	5	20	1	22	2	20	0	15	1	19	2	21	0	1	0	15	1	9	1	24	0	0	1	8	1
RECQL	ENSG00000004700.16	chr12	-	21474995	21475467	IR	TRUE	0.00263088	9.25841e-06	[37, 77, 39, 35, 93, 324, 69, 349, 42, 102, 258, 316, 333, 408, 465, 572, 592, 92, 101, 168, 197, 307, 358, 377, 378, 385, 410, 437, 453, 458, 464, 520, 528, 532, 533, 541, 543, 545, 546, 553, 46, 559, 561, 562, 566, 567, 568, 574, 579, 72, 593, 84, 89, 91, 100, 160, 198, 225, 304, 323, 369, 380, 381, 382, 386, 404, 427, 444, 451, 452, 459, 472, 483, 493, 496, 509, 604, 606]	[186, 50, 60, 114, 176, 121, 86, 191, 213, 73, 106, 189, 286, 242, 175, 222, 289, 336, 415, 432, 524, 598, 184, 200, 205, 239, 255, 292, 348, 383, 420, 522, 529, 530, 534, 549, 552, 576, 577, 586, 589, 97, 123, 124, 131, 133, 169, 171, 179, 183, 188, 206, 214, 218, 219, 250, 259, 260, 268, 269, 272, 295, 298, 300, 302, 305, 311, 322, 329, 331, 334, 342, 343, 344, 346, 354, 367, 371, 375, 384, 387…	1	1	0	0.255015	0.0192384	0.653515	0.0108035	0.399718	0.0506773	7	52	10	39	52	96	12	30	6	52	7	15	12	25	1	18	0	5	0	0	2	4	0	1	0	0	0	0	0
XAF1	ENSG00000132530.17	chr17	+	6758224	6759661	ES	FALSE	0.0026426	9.33228e-06	[0, 2, 5, 41, 8, 20, 52, 25, 142, 76, 62, 81, 60, 21, 115, 89, 110, 57, 112, 484, 86, 201, 4, 77, 128, 10, 73, 93, 172, 29, 15, 94, 101, 415, 87, 125, 141, 144, 148, 156, 179, 219, 417, 18, 72, 96, 146, 197, 241, 1, 31, 35, 36, 50, 51, 55, 84, 88, 161, 271, 297, 416, 448, 458, 483, 506, 536, 538, 53, 74, 82, 163, 194, 206, 216, 558, 337, 344, 395, 429, 445, 460, 512, 515, 516, 522, 530, 532, 533,…	[7, 28, 132, 69, 38, 23, 119, 47, 240, 265, 162, 272, 193, 127, 155, 231, 26, 195, 149, 232, 287, 317, 262, 276, 332, 244, 166, 254, 433, 525, 151, 251, 252, 268, 304, 314, 315, 334, 566, 602, 120, 235, 239, 250, 263, 269, 281, 301, 308, 321, 327, 335, 336, 350, 371, 437, 469, 482, 497, 499, 501, 520, 521, 527, 528, 542, 33, 553, 44, 59, 71, 599, 106, 129, 181, 183, 223, 226, 247, 249, 253, 255, …	0.357653	0.394427	0.0367737	0.0876575	0.00691692	0.0267063	0.000135123	0.0593829	0.00345694	60	340	174	571	183	708	114	482	15	228	12	229	47	497	26	363	24	409	0	112	11	118	5	80	0	0	0	30	4
PSMD1	ENSG00000173692.14	chr2	+	231166017	231166400	3AS	TRUE	0.00266324	9.44001e-06	[35, 152, 301, 45, 92, 224, 104, 269, 151, 285, 191, 79, 218, 108, 239, 247, 248, 251, 334]	[16, 42, 243, 271, 321, 217, 86, 279, 294, 170, 58, 240, 128, 262, 263, 267, 277, 158, 286, 31, 163, 164, 39, 297, 43, 299, 308, 181, 55, 311, 317, 319, 66, 323, 324, 210, 89, 241, 242, 249, 250, 252, 253, 255]	1	1	0	0.876667	0.0131997	0.328286	0.0550589	0.662488	0.0992651	9	9	7	7	13	13	3	3	7	7	2	4	2	2	1	1	4	5	2	2	2	6	15	16	0	0	2	2	3
BRCA1	ENSG00000012048.23	chr17	-	43095922	43097243	3AS	TRUE	0.00266324	9.47093e-06	[8, 16, 50, 45, 30, 76, 34, 112, 36, 98, 110, 91, 2, 7, 71, 105, 35, 100, 166, 199, 17, 46, 58, 185, 309, 6, 38, 61, 95, 101, 128, 150, 159, 188, 194, 14, 63, 97, 125, 130, 138, 146, 256, 395, 443, 9, 24, 31, 39, 73, 74, 81, 117, 139, 141, 144, 167, 173, 175, 189, 202, 206, 208, 212, 249, 267, 274, 285, 300, 301, 304, 319, 342, 372, 383, 396, 425, 435, 0, 1, 5, 12, 18, 20, 21, 23, 25, 26, 28, 40,…	[418, 170, 412, 197, 220, 224, 360, 386, 389, 148, 149, 161, 162, 422, 296, 424, 426, 178, 182, 441, 318, 192, 203, 331, 218, 355, 230, 231, 232, 363, 367, 368, 244]	0.379095	0.488372	0.109277	0.130914	0.00570208	0		0.0808573	0.0117019	0	3	0	3	0	3	1	2	0	1	1	3	0	1	0	0	0	0	1	1	0	0	0	0	0	0	0	0	1
ABCC5	ENSG00000114770.17	chr3	-	183985378	183987769	3AS	FALSE	0.00267227	9.56904e-06	[13, 5, 45, 94, 22, 130, 23, 6, 136, 137, 151, 163, 46, 61, 108, 111, 117, 120, 131, 15, 146, 148, 152, 154, 155, 156, 159, 160, 162, 36, 164, 165, 41, 47, 49, 50, 53, 58, 63, 73, 74, 78, 110, 116, 125, 126]	[82, 80, 112, 96, 129, 139, 12, 140]	0.108046	0.757576	0.64953	0.0516769	0.0208531	0.2081	0.000244254	0.123148	0.0313765	0	15	0	8	0	20	2	22	3	5	0	8	0	6	0	8	0	8	0	7	0	7	4	7	0	0	0	1	3
SCLT1	ENSG00000151466.12	chr4	-	128965318	128970377	3AS	TRUE	0.00267227	9.56418e-06	[4, 11, 65, 6, 10, 12, 25, 46, 98, 56, 3, 57, 5, 24, 99, 111, 123, 201, 8, 22, 34, 63, 69, 96, 109, 112, 118, 122, 152, 198, 0, 13, 14, 36, 43, 85, 100, 113, 129, 134, 138, 140, 144, 163, 164, 199, 240, 251, 1, 2, 7, 9, 23, 26, 27, 28, 31, 32, 33, 37, 38, 39, 42, 47, 64, 66, 68, 70, 71, 74, 75, 76, 77, 79, 80, 88, 91, 92, 93, 94, 106, 107, 108, 110, 114, 117, 119, 124, 127, 132, 136, 142, 143, 15…	[55, 58, 41, 78, 219, 222, 102, 256, 135, 137, 266, 267, 151, 157, 158, 159, 160, 35, 44, 45, 172, 174, 52, 53, 72, 207, 81, 209, 210, 212, 220, 225, 249, 252, 253, 254]	0.241135	1	0.758865	0.115524	0.0101756	0.00406533	0.00023185	0.0611841	0.00954316	2	10	1	22	0	33	2	18	6	13	0	17	0	29	2	10	2	14	1	1	2	21	6	22	0	0	0	1	0
MBD4	ENSG00000129071.10	chr3	-	129437965	129439729	IR	TRUE	0.00268996	9.69882e-06	[62, 37, 337, 121, 313, 315, 65, 89, 76, 289, 177, 293, 296, 302, 436, 437, 55, 440, 442, 326, 461, 472, 345, 346, 91, 474, 350, 481, 494, 368, 496, 383]	[26, 488, 214]	0.191781	0.0588235	0.132957	0.18081	0.025155	0.838653	0.0546148	0.409235	0.120919	3	29	2	22	2	13	0	15	4	20	1	3	3	6	0	6	0	4	4	5	0	2	0	0	0	0	1	3	0
TCP11L1	ENSG00000176148.16	chr11	+	33059095	33061529	3AS	TRUE	0.00268996	9.68226e-06	[2, 28, 0, 4, 15, 19, 22, 45, 54, 24, 40, 6, 8, 13, 41, 44, 21, 25, 26, 30, 33, 39, 47, 65, 68, 71, 78, 79, 80, 96, 113, 120, 3, 5, 9, 12, 14, 16, 20, 32, 34, 36, 38, 42, 43, 48, 51, 53, 56, 59, 61, 62, 67, 69, 72, 73, 81, 82, 87, 91, 93, 97, 99, 100, 102, 107, 108, 109, 110, 114, 115, 119, 124, 125, 126]	[17, 60, 23, 70, 88, 117, 122, 7, 10, 11, 18, 63, 66, 89, 90, 104, 105, 106, 111, 112, 116, 123]	0.223404	0.180328	0.0430764	0.2007	0.0132764	0.00530252	1.36287e-07	0.0983014	0.0201517	1	4	0	5	3	19	7	25	5	17	0	7	0	13	0	6	0	1	2	6	2	5	0	5	0	0	2	9	0
NOP58	ENSG00000055044.11	chr2	+	202292903	202297357	3AS	TRUE	0.00271639	9.82766e-06	[436, 48, 531, 507, 511, 514, 527, 517, 524, 537, 27, 674, 549, 426, 686, 689, 437, 696, 697, 698, 724, 727, 731, 732, 100, 487, 488, 115]	[43, 116, 86, 465, 518, 144, 56, 482, 362, 243, 374, 127, 388, 705, 273, 289, 440, 505, 379, 413, 672, 419, 292, 38, 688, 562, 574, 454, 481, 123, 108, 492, 368]	1	1	0	0.560073	0.115784	1		0.713786	0.117189	14	18	6	6	65	65	26	41	6	11	8	8	12	12	1	1	0	0	0	3	1	1	0	4	0	0	1	3	1
FDPS	ENSG00000160752.15	chr1	+	155308965	155310063	3AS	FALSE	0.00284954	1.03446e-05	[1, 44, 39, 72, 48, 83, 6, 11, 31, 34, 47, 49, 50, 60, 61, 62, 63, 64, 70, 88, 103, 108, 109, 113, 118, 119, 125, 128, 130, 134, 137]	[0, 18, 17, 2, 40, 43, 87, 25, 46, 19, 69, 76, 90, 91, 104, 105, 13, 20, 24, 26, 30, 35, 38, 56, 57, 58, 59, 65, 67, 71, 73, 74, 75, 79, 85, 92, 93, 94, 95, 96, 97, 106, 110, 112, 114, 120, 121, 122, 126, 127, 131, 135, 136]	0.313725	0.253333	0.0603922	0.761332	0.0025238	0.537451	7.12655e-05	0.648017	0.0128606	5	5	4	5	6	7	17	19	6	9	12	19	21	27	11	20	2	2	2	4	8	13	7	7	0	0	6	6	15
TRAPPC6B	ENSG00000182400.15	chr14	-	39158402	39159482	3AS	TRUE	0.00285862	1.04128e-05	[1, 2, 15, 17, 28, 43, 12, 21, 120, 20, 80, 85, 16, 26, 51, 69, 129, 157, 3, 13, 58, 81, 190, 68, 35, 42, 44, 45, 46, 53, 60, 111, 112, 117, 139, 144, 159, 170, 196, 201, 207, 213, 214, 0, 11, 29, 31, 32, 54, 59, 62, 65, 73, 84, 88, 94, 98, 103, 108, 113, 114, 125, 127, 133, 137, 143, 148, 149, 151, 153, 160, 163, 179, 181, 184, 186, 187, 188, 191, 192, 194, 197, 200, 205, 210, 216, 217, 218, 225…	[14, 74, 30, 77, 72, 208, 100, 102, 150, 24, 39, 168, 171, 177, 209, 86, 215, 92, 222, 97, 104, 109, 110, 224]	0.1377	0.990654	0.852954	0.0968256	0.00434453	0.0125713	0.00036706	0.0546671	0.00481216	5	40	2	61	7	61	11	52	8	51	0	79	0	47	0	10	2	27	9	25	1	8	2	8	0	4	0	0	1
ZNF410	ENSG00000119725.20	chr14	+	73886915	73893796	3AS	FALSE	0.00300875	1.09968e-05	[1, 53, 99, 135, 302, 355, 326, 175, 88, 249, 283, 253]	[18, 57, 188, 195, 214, 161, 300, 387, 54, 196, 221, 109, 366, 389, 14, 15, 19, 411, 415, 37, 422, 39, 295, 298, 299, 46, 431, 307, 436, 437, 311, 439, 441, 187, 191, 192, 321, 323, 327, 329, 336, 339, 340, 342, 344, 351, 354, 359, 110, 237, 240, 242, 367, 368, 374, 377, 254]	0.209302	0.224359	0.0150566	0.840766	0.00994232	0.263984	0.0249867	0.716475	0.0440854	10	10	4	4	5	8	4	6	8	9	2	5	0	1	8	8	5	5	5	9	3	4	11	12	0	0	9	12	6
LETMD1	ENSG00000050426.16	chr12	+	51049185	51053811	3AS	FALSE	0.0030793	1.13221e-05	[11, 39, 33, 236, 63, 202, 95, 111, 274, 132, 140, 296, 48, 226, 2, 137, 16, 146, 284, 183, 73, 75, 79, 212, 230, 231, 249]	[7, 13, 1, 23, 52, 88, 65, 47, 8, 15, 87, 104, 85, 139, 12, 9, 89, 180, 93, 86, 97, 101, 102, 141, 160, 21, 92, 115, 135, 237, 36, 204, 205, 221, 223, 6, 67, 120, 156, 161, 168, 3, 5, 30, 51, 54, 59, 74, 76, 77, 105, 107, 109, 112, 117, 121, 124, 129, 145, 155, 157, 164, 165, 172, 174, 178, 188, 195, 206, 208, 210, 213, 217, 219, 222, 224, 228, 232, 241, 243, 245, 247, 250, 253, 255, 262, 266, 27…	0.334783	0.645412	0.31063	0.791724	0.00268149	0.910399	1.16723e-05	0.846851	0.00409934	45	51	44	48	69	94	53	67	45	69	25	27	70	90	38	46	4	6	12	14	24	29	12	17	0	0	3	4	13
TNIP1	ENSG00000145901.16	chr5	-	151032394	151033607	3AS	TRUE	0.0030793	1.13307e-05	[21, 154, 18, 88, 17, 158, 165, 192, 151, 166, 68, 393, 423, 313, 342, 19, 146, 273, 159, 414, 161, 419, 430, 309, 314, 441, 447, 73, 218, 347, 348, 365, 369, 374, 383]	[5, 2, 57, 47, 76, 15, 210, 74, 79, 64, 97, 235, 401, 289, 35, 167, 52, 188, 216, 92, 257, 23, 172, 303, 439, 59, 354, 101, 251, 130, 385, 6, 10, 394, 399, 274, 20, 276, 278, 412, 285, 33, 168, 425, 302, 431, 179, 436, 184, 442, 318, 66, 324, 202, 204, 334, 339, 345, 103, 105, 233, 361, 362, 238, 366, 244, 381, 255]	0.0490196	0.0504202	0.00140056	0.590878	0.0350644	0.91493	0.00282832	0.753977	0.0416132	0	0	8	10	5	6	21	85	0	1	0	0	11	14	1	1	0	0	11	11	0	1	41	70	0	0	24	48	0
DPY19L4	ENSG00000156162.16	chr8	+	94783802	94787893	3AS	TRUE	0.00308272	1.13814e-05	[0, 2, 79, 102, 107, 55, 11, 59, 5, 36, 78, 80, 89, 18, 22, 26, 44, 64, 84, 91, 122, 139, 14, 23, 24, 29, 32, 38, 41, 52, 53, 54, 56, 81, 93, 113, 124, 125, 135, 4, 6, 8, 9, 10, 12, 16, 17, 19, 20, 21, 27, 28, 34, 35, 39, 40, 42, 45, 47, 48, 51, 57, 58, 60, 61, 62, 63, 65, 67, 69, 71, 72, 73, 74, 75, 76, 77, 82, 83, 85, 86, 87, 88, 94, 95, 96, 98, 100, 101, 103, 104, 105, 106, 108, 109, 111, 115,…	[153, 25, 129, 133, 13, 15, 147, 149, 156, 31, 43, 46, 49, 50, 66, 68, 70, 114, 127]	0.648829	1	0.351171	0.136817	0.00547454	0		0.0679424	0.0072807	1	9	0	11	0	27	0	1	2	8	0	3	1	11	0	2	0	1	1	2	0	0	1	1	0	1	0	0	0
SLC22A15	ENSG00000163393.13	chr1	+	116037686	116038344	ALJ	TRUE	0.0031337	1.16083e-05	[13, 17, 70, 14, 33, 43, 104, 5, 15, 25, 41, 76, 80, 90, 102, 107, 124, 4, 9, 18, 27, 30, 35, 40, 45, 56, 59, 68, 71, 72, 73, 91, 115, 140, 148, 164, 0, 2, 6, 7, 8, 10, 12, 16, 19, 20, 21, 22, 23, 24, 26, 28, 29, 31, 32, 34, 36, 37, 38, 39, 42, 44, 46, 47, 48, 49, 50, 51, 52, 53, 54, 55, 57, 58, 60, 61, 62, 63, 65, 66, 67, 74, 78, 82, 83, 84, 85, 86, 87, 88, 94, 95, 96, 97, 98, 99, 100, 101, 103,…	[158, 3, 138, 116, 129, 134, 137, 151, 160, 165, 64, 69, 75, 79, 81, 89, 114, 117, 119, 121, 123, 125, 126, 127]	0.883178	1	0.116822	0.2749	0.0225041	0.00862574	9.19213e-05	0.15501	0.0297682	0	3	1	13	1	14	1	5	2	7	0	3	0	1	0	0	1	4	2	2	1	3	7	18	0	0	1	2	1
ABTB1	ENSG00000114626.18	chr3	+	127677563	127677675	IR	FALSE	0.00315065	1.171e-05	[1, 2, 4, 7, 8, 21, 17, 57, 51, 36, 151, 70, 60, 63, 28, 39, 44, 75, 148, 0, 27, 54, 59, 62, 81, 102, 125, 3, 5, 13, 20, 31, 35, 53, 58, 61, 66, 68, 76, 83, 99, 114, 122, 129, 137, 9, 16, 18, 26, 32, 34, 38, 41, 45, 46, 47, 48, 50, 56, 67, 71, 77, 78, 80, 85, 86, 89, 90, 92, 93, 94, 96, 97, 98, 100, 104, 105, 106, 107, 112, 113, 115, 116, 117, 118, 123, 124, 128, 130, 131, 132, 134, 135, 136, 138…	[14, 10, 72, 12, 15, 101, 6, 11, 19, 29, 65, 79, 88, 23, 24, 33, 37, 40, 64, 69, 87, 91, 95, 103, 109, 163]	0.381271	0.98	0.598729	0.00313126	4.3002e-05	0.120868	0.00420709	0.0632458	0.00785939	0	0	0	6	0	0	0	25	0	0	0	0	1	22	0	1	0	0	0	61	0	8	0	15	0	0	0	100	0
ZWILCH	ENSG00000174442.12	chr15	+	66527912	66528835	IR	TRUE	0.00325436	1.21356e-05	[63, 64, 87, 69, 234, 266, 147, 66, 78, 269, 151, 291, 80, 239, 263, 265, 138, 139, 144, 145, 148, 149, 152, 153, 289, 293, 294, 296, 311, 61, 222, 95, 228, 240]	[91, 115, 172, 206]	1	1	0	0.0303103	0.000717621	0.777578	0.000574352	0.17037	0.0781792	0	15	0	3	0	4	2	13	0	7	0	0	0	1	0	2	0	3	0	4	0	0	0	4	0	0	0	1	0
TNFAIP3	ENSG00000118503.15	chr6	+	137867258	137867494	AFJ	FALSE	0.00329935	1.23441e-05	[7, 8, 16, 15, 1, 10, 38, 11, 49, 51, 26, 14, 27, 0, 64, 47, 53, 76, 88, 65, 101, 55, 5, 46, 93, 122, 125, 127, 48, 95, 110, 133, 9, 30, 81, 83, 103, 121, 2, 4, 18, 28, 32, 35, 39, 50, 74, 77, 89, 105, 111, 112, 117, 123, 136, 137, 140, 141, 151, 3, 17, 19, 20, 21, 22, 24, 25, 29, 31, 33, 34, 36, 45, 52, 56, 57, 58, 59, 62, 63, 66, 67, 68, 69, 70, 71, 73, 75, 78, 80, 82, 84, 86, 87, 91, 92, 100, …	[6, 12, 13, 37, 23, 72, 42, 94, 97, 96, 113, 148, 40, 90, 98, 129, 131, 139, 144, 145, 146, 150, 41, 43, 44, 54, 60, 61, 79, 85, 99, 109, 116, 118, 119, 120, 154, 156]	0.204738	0.18709	0.017648	0.241212	0.0234263	0.369838	1.72869e-05	0.2938	0.0142297	0	0	4	12	0	11	6	17	1	1	0	3	2	2	0	1	0	0	0	33	5	67	52	185	0	1	1	20	2
PHKB	ENSG00000102893.16	chr16	+	47461426	47463898	3AS	FALSE	0.00339892	1.27586e-05	[0, 90, 142, 58, 6, 59, 44, 1, 88, 124, 196, 19, 20, 86, 423, 290, 46, 52, 233, 222, 430, 244, 323, 83, 163, 226, 286, 353, 101, 193, 265, 349, 367, 424, 489, 45, 184, 321, 347, 391, 455, 458, 463, 103, 267, 369, 373, 461, 462, 652, 774, 63, 141, 202, 228, 242, 245, 258, 318, 329, 357, 401, 457, 575, 590, 719, 799, 800, 814, 94, 171, 191, 203, 225, 238, 250, 270, 283, 293, 295, 346, 354, 356, 379…	[3, 62, 60, 50, 199, 247, 91, 165, 170, 64, 361, 186, 260, 10, 153, 587, 597, 131, 787, 332, 408, 15, 644, 239, 577, 96, 642, 678, 684, 690, 232, 773, 316, 378, 919, 540, 119, 120, 673, 687, 187, 718, 725, 263, 779, 781, 788, 789, 285, 804, 805, 808, 830, 839, 850, 862, 399, 400, 434, 453, 971, 470, 993, 514, 5, 527, 531, 538, 543, 49, 568, 574, 582, 592, 85, 87, 600, 89, 605, 95, 607, 102, 632, …	1	0.119325	0.880675	0.42021	0.00723496	0.256828	0.0107286	0.34038	0.0169176	159	366	260	665	253	675	192	304	93	203	43	183	50	178	36	82	15	28	3	5	9	24	13	32	0	0	3	4	12
ZNF91	ENSG00000167232.14	chr19	-	23362725	23395324	3AS	TRUE	0.00340961	1.28409e-05	[17, 0, 111, 34, 226, 14, 110, 112, 94, 267]	[16, 31, 114, 18, 46, 20, 45, 21, 167, 135, 164, 205, 75, 166, 44, 201, 55, 78, 53, 54, 58, 153, 178, 219, 26, 56, 65, 68, 163, 169, 171, 174, 176, 179, 185, 194, 204, 220, 242, 259, 262, 13, 19, 27, 50, 51, 59, 60, 61, 63, 67, 69, 70, 72, 76, 105, 106, 116, 161, 162, 168, 170, 172, 173, 175, 177, 182, 183, 184, 188, 190, 191, 192, 193, 197, 198, 199, 206, 209, 213, 214, 218, 221, 223, 229, 230, …	0.25641	0.239336	0.0170738	0.900981	0.0159051	0.456876	0.0253502	0.752349	0.066818	196	196	180	183	153	155	243	246	151	153	31	32	12	23	9	9	6	8	3	4	1	1	2	2	0	0	0	0	1
TREM1	ENSG00000124731.13	chr6	-	41286606	41286680	AFJ	TRUE	0.00344048	1.29996e-05	[18, 30, 47, 4, 6, 16, 48, 88, 37, 40, 58, 74, 0, 1, 2, 3, 5, 7, 8, 9, 34, 57, 83, 87, 96, 99]	[19, 20, 21, 27, 10, 28, 11, 25, 12, 14, 13, 38, 43, 42, 35, 52, 15, 71, 17, 32, 33, 36, 39, 44, 50, 53, 59, 65, 22, 24, 41, 45, 51, 61, 63, 69, 76, 91, 95, 23, 26, 29, 31, 46, 49, 54, 55, 56, 60, 62, 64, 66, 67, 68, 70, 72, 73, 75, 77, 78, 79, 80, 81, 82, 84, 85, 86, 89, 90, 92, 93, 94, 97, 98]	0.850746	0.261861	0.588885	0.946348	3.85282e-06	0.549911	0.16456	0.721753	0.085912	0	1	0	1	0	0	0	0	0	0	0	0	0	0	0	0	4	5	105	110	182	189	60	67	0	0	12	12	83
RPS6KB1	ENSG00000108443.14	chr17	+	59936541	59945405	3AS	TRUE	0.00350961	1.33281e-05	[1, 152, 140, 150, 257, 387, 185, 324, 102, 117, 130, 261, 263, 264, 22, 279, 177, 197, 236, 238, 370, 253, 254, 255, 393]	[39, 204, 62, 91, 256, 300, 375, 291, 320, 225, 229, 386, 262, 391, 284, 32, 36, 298, 299, 304, 52, 308, 309, 311, 312, 63, 318, 322, 198, 207, 337, 351, 353, 230, 365, 239, 367, 378]	0.272727	0.432432	0.159705	0.657772	0.0399086	0.129372	0.0201558	0.40506	0.102737	6	6	1	4	4	6	7	8	11	13	0	1	0	4	0	0	0	0	0	4	1	3	8	11	0	0	2	2	4
ARMCX5-GPRASP2	ENSG00000271147.8	chrX	+	102639533	102640060	IR	TRUE	0.00350961	1.33475e-05	[115, 104, 111, 134, 114, 117, 119, 120, 130, 136, 137, 13, 141, 144, 148, 149, 150, 23, 25, 103, 105, 106, 107, 109, 112, 121, 127]	[22, 9, 61, 50, 1, 46, 62, 84, 4, 58, 41, 56, 82, 90, 43, 48, 54, 60, 63, 67, 79, 91, 94, 33, 69, 81, 83, 88, 100, 2, 129, 5, 131, 132, 133, 138, 140, 146, 27, 40, 45, 55, 59, 64, 65, 66, 70, 71, 72, 73, 77, 78, 80, 85, 86, 92, 96, 98, 108, 113, 116, 122, 123, 126, 152, 153]	1	1	0	0.592546	0.0679424	0.978085	0.00929142	0.779714	0.0882241	6	16	5	9	4	7	1	7	11	14	7	8	9	11	5	8	0	3	0	0	4	4	0	0	0	0	0	0	2
ADAM28	ENSG00000042980.13	chr8	+	24341757	24343100	3AS	TRUE	0.00355243	1.35542e-05	[4, 14, 19, 76, 61, 142, 30, 308, 238, 44, 173, 27, 91, 66, 60, 56, 78, 278, 264, 9, 171, 190, 151, 31, 561, 5, 52, 114, 317, 337, 141, 113, 307, 164, 182, 330, 526, 45, 194, 583, 99, 152, 242, 627, 32, 452, 207, 252, 265, 274, 290, 468, 652, 15, 401, 432, 510, 543, 665, 690, 24, 73, 162, 176, 377, 412, 414, 466, 471, 942, 12, 128, 223, 256, 261, 263, 294, 306, 315, 319, 342, 380, 436, 444, 451, …	[96, 39, 243, 53, 64, 402, 208, 267, 89, 648, 721, 304, 496, 1100, 221, 423, 499, 48, 107, 161, 166, 169, 385, 417, 513, 519, 1129, 170, 188, 719, 237, 1031, 554, 579, 1107, 610, 1124, 104, 133, 163, 1194, 707, 1216, 282, 329, 887, 1429, 445, 1478, 982, 989, 502, 509, 1024, 521, 11, 13, 551, 571, 72, 1115, 606, 1116, 109, 623, 1160, 147, 664, 667, 674, 1188, 684, 1201, 178, 1204, 184, 698, 187, 1…	0.2074	0.995828	0.788428	0.155389	0.0297568	0.0725804	0.00053794	0.118366	0.011584	8	394	28	535	55	376	68	439	15	232	11	601	16	101	6	196	0	7	0	2	0	12	5	8	0	0	0	0	2
PPM1M	ENSG00000164088.18	chr3	+	52249655	52250594	ALJ	TRUE	0.00361017	1.38191e-05	[0, 14, 15, 10, 37, 4, 11, 13, 6, 41, 59, 5, 28, 33, 23, 29, 35, 24, 31, 60, 63, 70, 78, 20, 26, 32, 43, 45, 48, 50, 66, 68, 69, 71, 74, 79, 84, 91, 1, 2, 3, 7, 16, 17, 18, 19, 21, 22, 25, 27, 30, 34, 36, 38, 39, 40, 42, 44, 46, 47, 52, 53, 54, 55, 56, 57, 58, 61, 62, 64, 65, 67, 72, 73, 75, 76, 77, 80, 81, 82, 83, 85, 86, 87, 89, 92, 93, 94, 96, 97, 98, 99, 100, 101, 102, 103, 104]	[8, 49, 51, 95, 9, 88, 90]	0.216443	0.176471	0.0399724	0.189307	0.0221822	0.00409653	2.01977e-07	0.0871134	0.0211662	0	1	1	8	0	6	15	27	0	1	0	0	3	15	0	3	0	2	1	7	3	7	0	3	0	0	3	14	0
TMX3	ENSG00000166479.10	chr18	-	68689054	68689947	IR	TRUE	0.00374916	1.43974e-05	[3, 6, 34, 124, 77, 172, 10, 200, 193, 175, 293, 219, 65, 161, 341, 380, 202, 213, 303, 377, 407, 462, 128, 379, 386, 31, 50, 579, 92, 192, 344, 367, 389, 409, 514, 35, 554, 573, 587, 82, 117, 150, 177, 186, 215, 223, 243, 359, 371, 388, 392, 399, 461, 469, 470, 509, 512, 513, 520, 521, 524, 525, 25, 540, 32, 544, 550, 552, 557, 560, 567, 568, 571, 63, 578, 580, 81, 90, 134, 136, 171, 197, 210, 2…	[18, 142, 170, 143, 274, 284, 141, 16, 397, 39, 169, 362, 246, 256, 139, 140, 276, 69, 214, 515, 261, 145, 285, 547, 167, 168, 425, 302, 304, 305, 56, 185, 187, 572, 75, 465, 211, 222, 224, 105, 491, 492, 114, 372, 249, 593, 599, 601]	0.795853	0.612245	0.183608	0.113834	0.00325585	0.369227	0.00740139	0.222441	0.0218482	4	23	5	67	10	76	1	44	7	52	1	43	8	75	1	11	0	6	2	10	1	9	2	5	0	0	0	1	0
IRAK3	ENSG00000090376.11	chr12	+	66203893	66208235	3AS	TRUE	0.00376898	1.45266e-05	[6, 35, 178, 58, 146, 20, 128, 9, 14, 165, 44, 78, 130, 139, 155, 43, 172, 47, 53, 186, 191, 197, 204, 215, 224, 227, 101, 106, 118, 119]	[93, 121, 104, 150, 177, 89, 129, 148, 184, 117, 141, 156, 30, 164, 173, 174, 175, 193, 203, 206, 221, 229, 230, 233, 115, 116]	0.953125	0.968254	0.015129	0.607415	2.23964e-05	0.0401027	2.42893e-05	0.423692	0.0491916	0	0	0	0	0	0	0	0	0	0	0	0	0	0	0	0	0	0	2	5	6	8	20	30	0	0	2	2	7
SLC38A9	ENSG00000177058.12	chr5	-	55626659	55627890	3AS	TRUE	0.00376898	1.45666e-05	[0, 9, 5, 3, 13, 31, 50, 66, 48, 16, 32, 71, 4, 39, 1, 56, 85, 12, 19, 24, 33, 35, 37, 43, 55, 64, 68, 79, 101, 110, 6, 22, 26, 34, 54, 62, 80, 84, 87, 89, 98, 116, 117, 127, 145, 153, 158, 160, 165, 168, 171, 174, 177, 179, 181, 194, 198, 2, 7, 8, 11, 17, 23, 27, 28, 30, 36, 40, 44, 45, 47, 52, 58, 59, 60, 63, 67, 70, 74, 76, 77, 78, 81, 83, 86, 90, 92, 95, 97, 99, 102, 103, 104, 105, 108, 109, …	[15, 42, 193, 135, 21, 189, 132, 138, 20, 151, 152, 155, 163, 164, 46, 49, 51, 61, 191, 72, 201, 75, 203, 204, 121]	0.266436	0.307692	0.0412563	0.155212	0.00970094	0.016169	3.46542e-06	0.0857509	0.0105773	4	24	1	19	0	18	3	9	3	19	1	20	0	15	2	10	5	9	4	7	0	4	0	1	0	0	0	1	0
ENOX2	ENSG00000165675.16	chrX	-	130623900	130625445	ALJ	TRUE	0.0037744	1.46341e-05	[26, 22, 235, 79, 182, 67, 137, 243, 284, 24, 158, 160, 170, 203, 206, 225, 373, 25, 27, 91, 99, 116, 136, 163, 204, 213, 223, 230, 247, 251, 258, 265, 285, 293, 298, 307, 327, 328, 329, 331, 344, 357, 363, 374, 376, 378, 379, 383]	[0, 4, 2, 3, 9, 11, 139, 6, 7, 44, 1, 49, 14, 20, 45, 35, 39, 21, 140, 93, 5, 80, 141, 192, 33, 74, 154, 171, 18, 40, 12, 19, 41, 151, 193, 30, 86, 107, 228, 257, 346, 16, 28, 115, 122, 130, 173, 196, 229, 275, 57, 61, 77, 143, 148, 184, 221, 227, 245, 15, 52, 65, 105, 114, 123, 145, 146, 149, 150, 179, 199, 200, 205, 217, 254, 32, 36, 48, 53, 71, 72, 75, 78, 81, 84, 89, 100, 108, 127, 147, 152, …	0.80236	0.0835946	0.718765	0.830465	0.0206809	0.947423	0.000540751	0.893504	0.00767091	125	141	164	178	274	294	188	199	99	111	187	204	180	194	25	28	55	58	20	30	22	28	8	9	0	0	2	4	13
PDLIM7	ENSG00000196923.14	chr5	-	177489841	177490869	3AS	TRUE	0.00384776	1.49661e-05	[21, 39, 75, 71, 105, 108, 20, 87, 30]	[7, 1, 60, 45, 8, 33, 55, 68, 84, 97, 4, 6, 15, 22, 28, 41, 61, 64, 72, 76, 79, 80, 82, 83, 86, 91, 94, 100, 106, 107]	0.12	0.909774	0.789774	0.544666	0.0156626	0.983029	0.000486666	0.71156	0.057846	0	0	0	0	0	0	0	0	0	0	0	0	0	0	0	1	0	0	11	30	0	0	9	12	0	0	19	26	0
GTF2IRD2B	ENSG00000174428.18	chr7	+	75135057	75136784	3AS	TRUE	0.00407978	1.59189e-05	[2, 25, 16, 13, 29, 7, 15, 31, 51, 4, 37, 57, 129, 35, 54, 69, 89, 112, 39, 47, 104, 165, 173, 30, 33, 50, 59, 64, 65, 70, 76, 77, 80, 102, 117, 127, 131, 134, 144, 153, 170, 17, 18, 22, 23, 32, 34, 41, 44, 45, 46, 52, 53, 56, 61, 62, 66, 68, 71, 73, 74, 79, 82, 91, 92, 95, 98, 101, 105, 106, 121, 126, 130, 138, 139, 141, 143, 147, 152, 156, 157, 160, 162, 163, 171, 176, 177, 178, 179]	[5, 26, 6, 49, 93, 10, 148, 60, 63, 100, 123, 124, 128, 28, 166, 55, 72, 114, 115, 125, 132, 135, 140, 14, 142, 146, 149, 150, 158, 159, 167, 168, 172, 75, 87, 90, 107, 109, 110, 111, 118, 120, 122]	0.318618	1	0.681382	0.324747	0.0142438	0.0904578	0.000275997	0.19776	0.0163359	2	8	29	51	5	23	10	16	2	11	2	9	15	47	3	6	0	0	0	0	1	2	2	5	0	0	0	1	1
ARMCX5-GPRASP2	ENSG00000271147.8	chrX	+	102640060	102642277	ALJ	TRUE	0.00410814	1.60803e-05	[7, 3, 22, 9, 6, 14, 11, 16, 61, 0, 50, 1, 46, 62, 84, 4, 21, 58, 74, 29, 41, 44, 56, 57, 82, 90, 8, 43, 48, 54, 60, 63, 67, 76, 79, 89, 91, 94, 95, 30, 31, 33, 36, 69, 81, 83, 88, 97, 100, 102, 2, 5, 10, 12, 15, 17, 18, 19, 20, 24, 26, 27, 28, 32, 34, 35, 37, 38, 39, 40, 42, 45, 47, 49, 51, 52, 53, 55, 59, 64, 65, 66, 68, 70, 71, 72, 73, 75, 77, 78, 80, 85, 86, 87, 92, 93, 96, 98, 99, 101, 108, …	[115, 104, 111, 134, 114, 117, 119, 120, 130, 136, 137, 13, 141, 144, 148, 149, 150, 23, 25, 103, 105, 106, 107, 109, 112, 121, 127]	0.994036	1	0.00596421	0.180347	0.0204093	0.00915607	0.00188684	0.0980607	0.0236172	10	26	4	19	3	16	6	17	3	25	1	19	2	18	3	10	3	3	0	0	0	6	0	0	0	1	0	0	0
TMCC2	ENSG00000133069.17	chr1	+	205271255	205271795	IR	TRUE	0.00416201	1.63425e-05	[2, 10, 30, 34, 97, 29, 46, 50, 52, 39, 76, 38, 51, 72, 85, 104, 3, 42, 56, 60, 64, 69, 71, 82, 84, 92, 100, 101, 102, 106, 108, 109]	[11, 20, 0, 103, 105, 89]	0.0432526	0.0108696	0.032383	0.047586	0.000259982	0.51589	0.000353626	0.168412	0.0299627	0	0	0	0	0	0	0	0	0	0	0	0	0	0	0	0	0	0	0	4	0	1	2	61	0	0	39	1182	0
MARS1	ENSG00000166986.15	chr12	+	57477446	57487385	ES	TRUE	0.00425327	1.67534e-05	[266, 432, 434, 440, 300, 552, 438, 618, 439, 522, 523, 863, 435, 470, 486, 548, 565, 1112, 538, 1377, 883, 489, 527, 553, 558, 1105, 778, 537, 544, 615, 632, 702, 717, 772, 887, 905, 524, 532, 551, 561, 571, 1143, 1137, 1142, 643, 705, 771, 774, 1379, 1327, 1331, 855, 1373, 1222, 529, 534, 545, 1073, 1074, 1134, 623, 1136, 1138, 629, 638, 1152, 1155, 1158, 1216, 707, 715, 781, 782, 790, 820, 133…	[466, 562, 482, 536, 1400, 547, 549, 566, 569, 475, 775, 464, 556, 642, 436, 487, 528, 531, 543, 554, 567, 568, 1102, 698, 776, 777, 1372, 478, 540, 614, 625, 1148, 641, 780, 1401, 476, 479, 530, 1556, 1557, 1058, 1059, 1065, 1066, 1068, 1071, 1109, 621, 622, 1135, 624, 1145, 634, 1146, 1157, 645, 700, 703, 706, 1220, 713, 1225, 1231, 723, 724, 788, 826, 1350, 879, 895, 897, 898, 901, 902, 1413, …	0.396384	0.421488	0.0251037	0.396152	0.1166	0.141999	0.000872143	0.21594	0.0258151	1	9	13	84	13	118	20	245	0	2	0	0	8	63	0	3	0	0	10	10	1	2	2	2	0	0	0	1	1
ZNF737	ENSG00000237440.9	chr19	-	20534934	20536133	ALJ	TRUE	0.00427789	1.69032e-05	[0, 3, 1, 5, 42, 30, 7, 36, 24, 34, 16, 43, 2, 46, 71, 21, 127, 129, 38, 49, 28, 18, 32, 33, 69, 172, 41, 48, 62, 89, 22, 57, 83, 97, 99, 109, 138, 160, 163, 63, 79, 91, 94, 98, 110, 122, 123, 139, 153, 167, 181, 4, 6, 11, 17, 29, 37, 47, 51, 52, 55, 58, 64, 66, 72, 73, 75, 77, 78, 80, 82, 84, 93, 101, 112, 114, 133, 149, 158, 159, 162, 164, 177, 183, 184, 198, 206, 210, 8, 9, 13, 14, 15, 20, 23,…	[12, 19, 146, 136, 128, 141, 173, 10, 157, 39, 169, 144, 81, 145, 176]	0.246041	0.187166	0.0588752	0.103075	0.00288808	0.0143304	2.71475e-05	0.0550678	0.00334346	15	110	49	227	17	224	44	248	9	66	20	210	5	110	2	22	0	19	0	3	0	1	2	9	0	0	0	0	0
SEC23A	ENSG00000100934.15	chr14	-	39037608	39039030	3AS	TRUE	0.00473923	1.88905e-05	[19, 8, 102, 97, 175, 103, 39, 86, 115, 130, 117, 119, 257, 353, 90, 105, 106, 159, 163, 173, 67, 101, 114, 129, 143, 165, 236, 243, 255, 361, 66, 99, 118, 126, 154, 212, 221, 239, 260, 265, 278, 282, 310, 312, 323, 370, 375, 383, 385, 401, 79, 116, 120, 121, 125, 127, 128, 131, 132, 133, 138, 141, 157, 158, 169, 182, 183, 184, 189, 194, 195, 202, 209, 211, 215, 220, 230, 242, 246, 250, 264, 268,…	[58, 237, 266, 234, 289, 291, 292, 228, 358, 394, 14, 365, 273, 405]	0.997389	0.208333	0.789056	0.119365	0.000888696	0.00919822	8.83847e-07	0.0752264	0.00725845	4	17	4	52	7	68	10	54	3	16	0	20	3	38	0	8	0	0	0	0	0	8	4	18	0	0	0	2	1
SELP	ENSG00000174175.17	chr1	-	169588851	169589565	ALJ	FALSE	0.00473923	1.88909e-05	[366, 3, 13, 373, 61, 47, 371, 400, 109, 136, 40, 382, 141, 15, 51, 77, 383, 76, 78, 130, 393, 19, 23, 49, 67, 108, 120, 212, 311, 370, 375, 20, 73, 103, 376, 7, 30, 86, 88, 90, 104, 106, 121, 127, 161, 315, 317, 10, 22, 24, 52, 80, 93, 96, 99, 101, 117, 119, 151, 160, 163, 164, 166, 171, 175, 184, 232, 255, 293, 299, 312, 316, 323, 374, 378, 2, 14, 28, 38, 57, 64, 82, 89, 97, 107, 125, 134, 137,…	[368, 369, 39, 6, 66, 12, 75, 386, 100, 92, 4, 81, 170, 381, 398, 43, 50, 5, 21, 55, 95, 122, 132, 263, 408, 26, 35, 110, 111, 124, 308, 379, 423, 9, 29, 46, 56, 60, 94, 98, 102, 211, 269, 270, 327, 328, 332, 392, 402, 421, 426, 0, 8, 16, 17, 18, 27, 36, 37, 41, 44, 45, 54, 62, 70, 131, 145, 150, 176, 177, 185, 187, 188, 189, 197, 201, 204, 205, 206, 209, 218, 219, 223, 224, 230, 237, 240, 241, 2…	0.785475	0.490113	0.295362	0.563337	0.0347282	0.321752	0.00166196	0.461479	0.0325877	13	34	18	49	37	83	11	50	14	33	12	34	4	11	14	36	17	22	18	30	70	90	63	99	0	0	0	0	13
NDUFAF5	ENSG00000101247.18	chr20	+	13814515	13816451	IR	TRUE	0.00473923	1.89017e-05	[237, 261, 266, 134, 274, 246, 260, 390, 392, 276, 150, 24, 301, 429, 310, 311, 443, 190, 356, 233, 108, 240, 245, 122, 255]	[14, 33, 27, 119, 45, 83, 135, 140, 146, 98, 111, 125, 149, 259, 53, 350, 115, 148, 280, 297, 70, 116, 133, 263, 265, 19, 410, 291, 292, 298, 54, 55, 326, 80, 211, 90, 95, 227, 244, 123, 449]	1	1	0	0.582221	0.000132155	0.942534	7.74499e-06	0.753284	0.0486491	1	2	11	16	3	6	20	34	0	0	2	2	5	10	0	2	0	0	0	1	0	0	0	1	0	0	0	0	0
TMEM214	ENSG00000119777.20	chr2	+	27037702	27038145	ES	FALSE	0.00500737	2.00329e-05	[0, 51, 2, 25, 91, 70, 62, 49, 64, 44, 10, 14, 32, 92, 104, 124, 39, 72, 82, 129, 9, 15, 29, 36, 50, 85, 102, 103, 118, 119, 125, 126, 127, 134, 137, 5, 6, 7, 13, 16, 18, 19, 24, 27, 31, 33, 43, 52, 54, 56, 57, 61, 65, 67, 68, 71, 73, 75, 76, 77, 78, 83, 90, 94, 96, 98, 101, 106, 107, 109, 112, 113, 114, 120, 121, 123, 138, 139]	[3, 38, 34, 60, 133, 135, 136, 23, 35, 40, 41, 47, 53, 55, 59, 63, 74, 79, 84, 89, 95, 105, 110, 141, 142]	0.176545	0.214286	0.0377409	0.213423	0.016745	0.0366203	6.8535e-07	0.123028	0.0136075	0	0	2	11	0	10	5	15	0	0	0	0	1	16	0	0	0	0	0	19	0	0	2	10	0	0	1	11	0
TLR2	ENSG00000137462.9	chr4	+	153684360	153701499	ES	TRUE	0.00510876	2.05017e-05	[31, 25, 35, 48, 47, 159, 70, 169, 141, 15]	[44, 59, 53, 28, 29, 92, 77, 45, 75, 79, 142, 51, 57, 73, 133, 42, 150, 55, 85, 118, 149, 41, 134, 151, 156, 167, 74, 83, 84, 96, 114, 135, 136, 137, 138, 139, 140, 143, 144, 146, 147, 148, 152, 153, 155, 30, 157, 160, 161, 162, 163, 164, 166, 168, 170, 171, 172, 173, 72, 76, 82, 100, 106, 108, 113, 116, 117]	0.008	0.0122549	0.0042549	0.906907	1.57143e-05	0.353203	4.33406e-05	0.746967	0.0483726	0	0	0	0	0	0	0	0	0	0	0	0	0	0	0	0	0	0	63	71	12	14	28	28	1	1	3	3	10
EIF4B	ENSG00000063046.18	chr12	+	53022627	53033805	3AS	TRUE	0.00514952	2.07288e-05	[76, 12, 939, 1294, 623, 1813, 1174, 119, 152, 1786, 1214]	[34, 233, 210, 257, 320, 1699, 1452, 1336, 1406, 1169, 558, 180, 1735, 755, 1393, 1413, 1337, 1852, 1218, 606, 1397, 1402, 388, 518, 1542, 264, 270, 1422, 1430, 1432, 1307, 1439, 1824, 1695, 1827, 543, 551, 1453, 305, 1457, 1841, 823, 1856, 1349, 330, 1868, 1741, 1108, 732, 1125, 491, 369, 498, 1398, 1787]	0.0326531	0.0791855	0.0465325	0.848929	0.0111225	0.579248	0.022118	0.725932	0.0341116	25	25	60	78	69	75	177	182	19	21	5	5	9	15	2	3	1	1	40	40	5	5	16	24	0	0	3	3	7
LUC7L2	ENSG00000146963.18	chr7	+	139374471	139375508	IR	TRUE	0.00519577	2.09791e-05	[172, 186, 203, 134, 217, 258, 206, 224, 124, 306, 573, 574, 576, 207, 209, 387, 530, 153, 410, 541, 543, 416, 545, 546, 551, 552, 297, 333, 590, 594, 595, 470, 349, 350, 225, 611, 357, 496, 624, 498, 628, 502, 255]	[31, 6, 38, 137, 30, 271, 363, 62, 109, 43, 125, 195, 201, 216, 231, 265, 377, 141, 175, 199, 369, 376, 36, 220, 382, 393, 395, 98, 204, 221, 237, 257, 261, 307, 316, 327, 352, 362, 373, 463, 525, 32, 549, 41, 50, 69, 101, 112, 114, 633, 121, 146, 169, 171, 185, 200, 202, 230, 239, 247, 266, 268, 269, 270, 299, 309, 314, 318, 326, 338, 341, 344, 346, 355, 358, 359, 361, 380, 381, 405, 413, 414, 4…	0.886598	1	0.113402	0.58837	0.107267	0.896962	0.00149549	0.745198	0.0561474	5	13	25	26	58	61	35	41	3	4	12	13	15	19	3	3	0	0	0	2	0	1	1	2	0	0	0	0	0
SEPSECS	ENSG00000109618.12	chr4	-	25156974	25160255	3AS	TRUE	0.00523077	2.11851e-05	[15, 37, 51, 100, 11, 124]	[17, 32, 97, 18, 20, 30, 105, 78, 50, 113, 106, 44, 108, 111, 22, 114, 120, 125]	1	0.643678	0.356322	0.854623	0.035249	0.210618	0.000126171	0.628034	0.11213	5	5	0	0	0	0	0	0	5	5	0	3	0	0	0	0	1	1	0	0	1	1	6	6	0	0	1	1	6
UCKL1	ENSG00000198276.16	chr20	-	63945988	63946160	IR	TRUE	0.00525207	2.13362e-05	[168, 21, 76, 211, 140, 154, 33, 215, 258, 23, 35, 43, 45, 173, 212, 218, 222, 25, 161, 37, 297, 67, 209, 216, 219, 223, 224, 225, 98, 228, 229, 231, 232, 110, 239, 248, 251]	[27, 15, 17, 48, 79, 53, 74, 81, 104, 126, 172, 65, 78, 83, 144, 272, 152, 51, 190, 90, 107, 111, 257, 130, 133, 262, 8, 136, 141, 269, 148, 34, 166, 294, 42, 175, 176, 179, 180, 185, 187, 188, 191, 64, 68, 208, 84, 87, 88, 89, 92, 101, 236, 112, 240, 241, 125, 124, 253, 127]	0.97619	1	0.0238095	0.422336	0.0620637	0.893473	1.59158e-05	0.642429	0.0777086	0	1	1	9	5	7	4	41	0	1	0	0	15	19	5	7	0	0	4	4	0	0	0	0	0	0	0	1	0
DZANK1	ENSG00000089091.16	chr20	-	18465328	18466995	3AS	TRUE	0.00525592	2.14167e-05	[15, 77, 84, 65, 103, 11, 81, 19, 85, 88, 89]	[2, 64, 30, 1, 24, 45, 75, 0, 3, 32, 37, 55, 5, 12, 13, 31, 41, 43, 44, 57, 67, 68, 73, 94, 7, 9, 10, 14, 17, 18, 20, 22, 27, 28, 33, 36, 38, 39, 40, 42, 51, 53, 56, 58, 59, 60, 63, 66, 69, 70, 71, 72, 82, 87, 92, 95, 102, 105]	0	0.0956522	0.0956522	0.71622	8.23443e-05	1		0.872516	0.0186374	5	6	10	13	8	13	8	14	0	1	1	1	5	5	2	2	1	2	0	0	0	0	0	0	0	0	0	0	0
TRMT13	ENSG00000122435.10	chr1	+	100140514	100140851	3AS	TRUE	0.00530121	2.16667e-05	[4, 1, 13, 3, 35, 22, 58, 75, 11, 5, 39, 7, 34, 38, 67, 14, 15, 95, 220, 226, 40, 42, 54, 90, 45, 48, 57, 93, 120, 121, 149, 158, 173, 197, 223, 230, 266, 16, 21, 23, 27, 29, 32, 41, 55, 61, 63, 68, 69, 76, 91, 98, 100, 101, 111, 118, 126, 163, 164, 171, 178, 184, 193, 195, 196, 198, 200, 201, 203, 204, 210, 219, 221, 224, 231, 234, 240, 241, 247, 248, 257, 263, 264, 272, 273, 274, 275, 276, 277,…	[8, 33, 102, 46, 86, 87, 190, 192, 81, 256, 43, 49, 53, 56, 59, 194, 119, 251, 258, 265, 24, 37, 44, 175, 174, 182, 60, 64, 65, 78, 211, 85, 216, 89, 217, 94, 97, 239, 245]	0.0976236	1	0.902376	0.11755	0.00330604	0.0302135	2.26579e-05	0.0769835	0.00290417	7	32	5	107	3	64	10	69	9	47	4	118	1	57	5	14	2	12	0	4	1	3	3	7	2	11	0	0	1
NAA16	ENSG00000172766.19	chr13	+	41373880	41374741	IR	TRUE	0.00531333	2.18396e-05	[31, 67, 36, 189, 233, 21, 54, 68, 33, 340, 347, 224, 226, 123, 136, 409, 182, 59, 62, 319, 69, 326, 216, 346, 223, 229, 236, 247, 250, 252, 8, 264, 265, 141, 272, 18, 20, 22, 27, 30, 179, 185, 320, 196, 323, 72, 205, 207, 339, 342, 344, 219, 353, 227, 359, 104, 232, 240, 243, 246]	[93, 45, 162, 111, 118, 105, 11, 44, 174, 178]	1	1	0	0.0281783	0.00436634	0.456475	0.000252871	0.177149	0.0635456	0	4	0	18	0	16	0	20	0	3	0	1	3	16	0	1	0	3	0	3	0	0	0	16	0	0	0	0	0
MALAT1	ENSG00000251562.8	chr11	+	65500995	65501277	IR	TRUE	0.00531333	2.18475e-05	[11, 8, 12, 27, 18, 30, 156, 48, 98, 133, 10, 40, 87, 96, 101, 15, 147, 23, 26, 28, 29, 159, 163, 36, 37, 164, 165, 41, 42, 43, 44, 166, 46, 167, 172, 179, 184, 185, 89, 91, 110, 124]	[20, 22, 47, 52, 57, 127, 25, 107, 67, 72, 83, 94, 99, 6, 140, 13, 19, 158, 31, 33, 39, 171, 175, 49, 53, 54, 183, 60, 61, 70, 71, 75, 78, 85, 86, 88, 92, 95, 100, 105, 115, 126]	1	1	0	0.414253	7.84965e-05	1		0.549342	0.0322361	7	17	3	8	10	24	18	46	1	2	1	2	2	2	0	0	1	4	6	6	0	1	2	4	0	0	0	0	0
CDC7	ENSG00000097046.13	chr1	+	91500948	91501653	3AS	TRUE	0.00539506	2.22501e-05	[1, 44, 52, 9, 46, 86, 13, 2, 251, 3, 15, 47, 130, 142, 269, 272, 53, 206, 88, 221, 231, 123, 8, 137, 139, 141, 271, 274, 157, 31, 32, 289, 165, 178, 179, 74, 213, 214, 247, 122, 124, 307, 309]	[39, 226, 144, 50, 54, 257, 268, 273, 276, 136, 73, 233, 76, 270, 48, 51, 151]	0.117284	0.145299	0.0280152	0.280683	0.0251688	0.0170284	0.0003701	0.171573	0.0465821	2	2	0	6	0	6	0	2	2	6	0	2	0	2	0	0	1	3	8	8	0	0	2	11	0	0	0	0	2
SLC38A9	ENSG00000177058.12	chr5	-	55625850	55626673	ALJ	TRUE	0.00552823	2.28676e-05	[0, 9, 5, 3, 13, 31, 50, 66, 48, 16, 32, 53, 71, 4, 39, 1, 14, 56, 85, 12, 19, 24, 33, 35, 37, 43, 55, 64, 68, 69, 79, 101, 110, 6, 10, 22, 25, 26, 34, 54, 62, 65, 73, 80, 84, 87, 89, 98, 100, 116, 117, 127, 145, 148, 153, 158, 160, 161, 165, 168, 171, 174, 177, 179, 181, 194, 198, 2, 7, 8, 11, 17, 18, 23, 27, 28, 29, 30, 36, 38, 40, 41, 44, 45, 47, 52, 57, 58, 59, 60, 63, 67, 70, 74, 76, 77, 78,…	[15, 42, 193, 135, 21, 189, 132, 138, 20, 151, 152, 155, 163, 164, 46, 49, 51, 61, 191, 72, 201, 75, 203, 204, 121]	0.27856	0.307692	0.0291321	0.141098	0.00931494	0.0148713	3.02775e-06	0.0783151	0.00924009	4	25	1	22	0	24	3	10	3	24	1	21	0	17	2	10	5	10	4	7	0	6	0	1	0	0	0	1	0
TMX3	ENSG00000166479.10	chr18	-	68687890	68689054	ALJ	FALSE	0.00554192	2.29927e-05	[0, 13, 6, 48, 147, 7, 129, 34, 87, 15, 57, 18, 30, 62, 14, 126, 54, 132, 77, 189, 28, 142, 166, 64, 10, 131, 164, 200, 8, 170, 193, 9, 11, 293, 4, 138, 219, 143, 65, 118, 161, 190, 237, 341, 380, 22, 79, 159, 202, 5, 19, 71, 110, 113, 125, 213, 259, 274, 320, 377, 381, 407, 91, 93, 99, 128, 284, 157, 205, 226, 230, 253, 317, 353, 379, 384, 386, 494, 16, 20, 26, 31, 39, 50, 53, 59, 92, 101, 103, …	[3, 40, 124, 74, 172, 175, 303, 462, 277, 396, 409, 579, 344, 408, 177, 55, 573, 461, 97, 371, 373, 146, 275, 426, 171, 571, 578, 580, 331, 463, 464, 590, 343, 482, 370, 374, 375]	0.362273	0.443182	0.0809084	0.131649	0.0137385	0.0216755	0.000283762	0.0790394	0.00860507	8	161	18	218	33	228	14	103	17	129	23	210	25	137	5	33	3	42	6	27	4	30	0	10	0	1	1	2	5
FAM126B	ENSG00000155744.9	chr2	-	200988421	200992280	3AS	TRUE	0.00557025	2.3179e-05	[2, 15, 7, 38, 8, 21, 3, 63, 19, 22, 35, 91, 4, 27, 57, 5, 56, 28, 66, 37, 68, 1, 10, 13, 31, 42, 44, 60, 61, 78, 84, 94, 110, 116, 121, 126, 131, 136, 137, 138, 151, 9, 11, 17, 18, 20, 23, 24, 26, 30, 32, 34, 36, 39, 41, 45, 46, 49, 53, 54, 58, 59, 62, 64, 65, 70, 74, 75, 79, 81, 82, 83, 86, 87, 92, 95, 99, 100, 101, 102, 106, 107, 123, 124, 125, 129, 130, 132, 133, 143, 149, 150, 153, 154, 156,…	[25, 97, 85, 93, 88, 155, 134, 135, 169, 139, 14, 152, 29, 89, 127]	0.553846	1	0.446154	0.0932525	0.00276028	0		0.0471334	0.00385434	0	3	5	38	1	45	6	28	0	6	1	10	0	5	0	0	0	3	0	2	1	11	4	30	0	0	0	1	0
RPL24	ENSG00000114391.13	chr3	-	101682509	101682770	IR	TRUE	0.00575355	2.40128e-05	[37, 72, 34, 71]	[14, 38, 13, 19, 15, 67, 65, 51, 52, 33, 68, 74, 57, 59, 90]	0.037037	0.34968	0.312643	0.699971	0.106259	0.994874	0.000507169	0.828786	0.0809905	28	29	39	39	59	59	58	58	82	90	19	19	85	85	12	14	3	6	1	3	5	8	10	13	0	25	1	3	12
UROD	ENSG00000126088.14	chr1	+	45013019	45013161	IR	TRUE	0.00601944	2.51968e-05	[406, 144, 432, 419, 319, 522, 404, 544, 428, 564, 442, 503, 392, 527, 528, 412, 297, 557, 430, 438, 570, 574, 450, 453, 585, 458, 461, 480, 613, 118, 509]	[12, 17, 104, 196, 242, 295, 125, 22, 227, 277, 426, 175, 329, 332, 264, 400, 407, 283, 296, 307, 314, 189, 321, 322, 590, 336, 337, 342, 216, 349, 353, 100, 251, 619]	0.964286	0.14359	0.820696	0.784884	0.0518164	1		0.878545	0.0425703	3	3	18	19	11	11	21	21	1	2	7	7	14	14	6	6	0	1	1	1	0	1	27	40	5	5	7	16	10
GCA	ENSG00000115271.11	chr2	+	162359157	162359493	IR	FALSE	0.00604222	2.53668e-05	[2, 15, 16, 20, 72, 68, 12, 11, 25, 102, 53, 113, 45, 70, 18, 39, 56, 64, 71, 35, 47, 87, 127, 36, 14, 76, 58, 84, 65, 67, 136, 19, 60, 69, 105, 112, 119, 129, 147, 40, 42, 46, 79, 89, 92, 103, 110, 121, 137, 142, 152, 160, 165, 179, 7, 8, 9, 33, 38, 44, 51, 61, 73, 74, 85, 86, 88, 90, 91, 93, 94, 99, 104, 108, 114, 115, 116, 122, 125, 126, 128, 130, 131, 132, 138, 144, 145, 146, 148, 149, 151, 1…	[4, 6, 5, 22, 13, 1, 10, 27, 24, 135, 172, 48, 49, 81, 0, 30, 34, 173, 75, 143, 21, 23, 26, 28, 29, 31, 32, 177, 182, 55, 59, 66, 82, 96, 97, 106, 111, 198, 199]	0.127972	0.936207	0.808235	0.0723437	0.00457275	0.299638	0.0605234	0.196264	0.0395778	5	34	2	40	21	46	0	25	4	60	9	61	4	31	1	23	5	165	4	257	11	265	6	319	11	346	1	110	12
CIAO1	ENSG00000144021.3	chr2	+	96268658	96269255	3AS	TRUE	0.00610699	2.57141e-05	[18, 43, 55, 84, 32, 100, 42, 78]	[57, 66, 81, 65, 98, 71, 64, 75]	0.0416667	0.295455	0.253788	0.0531396	3.33383e-06	0.441468	0.0769806	0.208833	0.065853	0	2	2	19	0	5	2	25	0	0	0	0	1	15	0	0	0	0	0	3	1	7	0	2	0	0	0	0	0
ABCB7	ENSG00000131269.19	chrX	-	75071704	75073688	IR	TRUE	0.00627037	2.64795e-05	[37, 33, 167, 201, 20, 172, 190, 166, 196, 199, 239, 257, 259, 260, 266, 13, 21, 276, 24, 26, 39, 41, 173, 177, 179, 189, 192, 193, 200, 202, 207, 210, 234, 236]	[9, 22, 36, 27, 53, 191, 170, 58, 76, 112, 138, 25, 28, 55, 203, 95, 128, 143, 18, 275, 154, 168, 171, 46, 180, 184, 185, 59, 70, 211, 212, 220, 94, 96, 98, 113, 116]	1	1	0	0.456911	0.0406481	0.942651	0.000724085	0.625453	0.082393	10	21	20	22	12	28	8	19	2	4	3	4	4	4	1	3	0	2	0	0	0	1	0	3	0	0	0	2	0
HSPBP1	ENSG00000133265.11	chr19	-	55265378	55265885	3AS	TRUE	0.00627994	2.65974e-05	[10, 14, 38, 39, 11, 18]	[0, 7, 5, 15, 17, 22, 29, 1, 2, 8, 9, 21, 25, 27, 32, 36, 37, 40, 42]	0.0222222	0.040201	0.0179788	0.704255	4.48703e-05	0.970518	1.20722e-06	0.836285	0.0233563	0	0	0	0	2	2	7	7	0	0	0	0	7	12	2	2	0	0	14	23	2	2	2	4	0	0	8	10	0
ATAD1	ENSG00000138138.13	chr10	-	87756922	87767672	ES	TRUE	0.00635175	2.698e-05	[1, 2, 16, 6, 3, 64, 48, 73, 4, 5, 40, 74, 130, 49, 61, 17, 54, 75, 7, 82, 91, 38, 66, 100, 108, 113, 175, 177, 0, 29, 89, 101, 167, 185, 188, 215, 11, 22, 39, 77, 94, 111, 121, 128, 137, 169, 170, 173, 182, 220, 8, 12, 13, 26, 34, 35, 45, 51, 56, 62, 69, 78, 80, 84, 90, 92, 98, 99, 104, 107, 109, 112, 117, 118, 119, 120, 127, 131, 132, 134, 135, 136, 138, 143, 145, 152, 160, 171, 179, 193, 211, …	[23, 10, 44, 85, 153, 28, 79, 9, 67, 21, 146, 53, 115, 178, 18, 163, 164, 139, 149, 165, 181, 195, 213, 24, 43, 55, 59, 60, 76, 83, 88, 102, 114, 148, 166, 172, 174, 176, 184, 260, 15, 19, 20, 30, 41, 50, 52, 63, 65, 68, 70, 71, 72, 93, 96, 97, 103, 116, 129, 133, 140, 141, 150, 151, 155, 157, 158, 159, 168, 187, 189, 190, 191, 194, 196, 199, 200, 201, 202, 203, 204, 206, 209, 210, 226, 227, 232,…	0.0821918	0.855603	0.773412	0.235404	0.0194439	0.066698	0.00416787	0.145377	0.0187275	38	77	30	100	73	144	28	72	27	80	17	102	13	83	8	21	0	7	1	20	1	8	28	68	0	1	0	3	12
PPP6R3	ENSG00000110075.15	chr11	+	68548204	68567013	3AS	TRUE	0.00649682	2.76764e-05	[300, 512, 330, 171, 212, 637]	[131, 130, 104, 562, 186, 392, 297, 682, 310, 311, 593, 390, 396, 404, 277, 407, 664, 669, 158, 290, 294, 167, 168, 678, 174, 691, 436, 564, 182, 183, 185, 570, 317, 574, 695, 696, 699, 450, 700, 710, 713, 332, 717, 595, 97, 737, 365, 113, 372, 122, 383]	0.0769231	0.165217	0.0882943	0.946049	1.45141e-05	0.375	0.234374	0.802096	0.0902948	3	3	3	3	1	1	8	8	0	0	0	0	0	0	1	1	2	2	1	1	1	1	9	9	0	0	0	0	2
CRLF3	ENSG00000176390.12	chr17	-	30797398	30824522	3AS	TRUE	0.00654603	2.79669e-05	[8, 138, 194, 5, 230, 199, 208]	[15, 137, 233, 235, 243, 154]	0.979592	0.0526316	0.92696	0.76768	0.00786574	0.294593	2.49041e-05	0.609335	0.0342141	6	8	3	4	6	13	2	2	16	17	1	3	0	0	1	1	2	2	4	5	1	2	2	2	0	0	0	0	3
PELI1	ENSG00000197329.12	chr2	-	64100499	64104700	ES	FALSE	0.00659501	2.82576e-05	[0, 32, 14, 56, 62, 40, 50, 39, 45, 23, 22, 55, 10, 21, 48, 27, 25, 41, 6, 76, 364, 12, 168, 42, 63, 218, 118, 44, 134, 194, 309, 339, 37, 104, 105, 163, 166, 285, 360, 54, 58, 98, 137, 180, 320, 340, 13, 68, 90, 93, 114, 135, 147, 169, 224, 242, 363, 372, 103, 115, 124, 127, 133, 139, 143, 146, 149, 162, 205, 207, 209, 257, 270, 280, 292, 305, 378, 379, 38, 49, 65, 92, 113, 161, 172, 202, 213, 2…	[3, 19, 26, 34, 193, 81, 77, 212, 191, 152, 189, 268, 101, 185, 219, 251, 106, 122, 1, 302, 334, 375, 269, 324, 330, 344, 108, 249, 397, 398, 145, 275, 414, 291, 181, 311, 199, 332, 88, 227, 239, 262, 271, 273, 400, 403, 404, 407, 286, 31, 419, 297, 425, 303, 304, 433, 438, 314, 321, 323, 325, 198, 329, 331, 206, 91, 221, 352, 228, 230, 234, 362, 241, 117]	0.157715	0.932462	0.774747	0.107503	0.00313766	0.0473168	0.000200294	0.0798752	0.00224976	18	311	35	569	80	1495	66	901	45	668	139	462	14	143	0	41	8	54	14	103	45	342	35	233	0	0	2	11	29
ZFAND5	ENSG00000107372.13	chr9	-	72359521	72364695	ME	TRUE	0.00672028	2.88773e-05	[49, 125, 88, 115, 158, 168, 191]	[95, 169, 229, 183, 202, 243]	0.994048	1	0.00595238	0.795473	0.0359157	0.342141	0.0164613	0.563747	0.090994	0	0	1	1	2	6	0	0	0	1	0	0	2	4	0	0	1	1	15	15	27	32	59	64	0	0	32	36	19
GUSBP11	ENSG00000228315.12	chr22	-	23695517	23705428	ES	FALSE	0.00704446	3.03573e-05	[64, 15, 166, 85, 6, 29, 113, 115, 417, 9, 61, 486, 492, 10, 40, 123, 203, 214, 223, 249, 16, 531, 41, 78, 99, 188, 191, 234, 236, 238, 266, 290, 298, 299, 421, 455, 517, 12, 19, 543, 73, 86, 87, 88, 96, 137, 146, 167, 195, 205, 207, 210, 235, 244, 253, 257, 278, 279, 285, 287, 308, 313, 350, 374, 384, 432, 446, 450, 454, 1, 2, 5, 8, 13, 21, 23, 25, 28, 30, 540, 548, 45, 47, 559, 561, 51, 53, 565…	[118, 193, 121, 187, 32, 132, 213, 196, 316, 341, 429, 533, 66, 215, 485, 4, 7, 14, 58, 124, 148, 206, 263, 284, 423, 17, 151, 152, 160, 190, 340, 354, 356, 373, 427, 470, 472, 513, 518, 530, 22, 535, 534, 26, 49, 50, 71, 90, 101, 125, 140, 142, 170, 176, 201, 221, 246, 251, 560, 260, 262, 270, 275, 333, 349, 353, 358, 362, 365, 366, 369, 390, 394, 396, 422, 434, 443, 445, 475, 489, 495, 498, 502…	1	1	0	0.66299	0.0146875	0.381397	0.0129238	0.516354	0.0323032	0	0	18	23	17	23	63	70	4	4	0	0	17	36	3	4	0	0	24	45	3	6	14	25	0	0	4	5	1
UBA7	ENSG00000182179.13	chr3	-	49811080	49811272	3AS	TRUE	0.00711049	3.07296e-05	[83, 339, 159, 166, 174, 431, 85, 96, 128, 392, 21, 310, 185, 330, 98, 129, 7, 9, 137, 141, 142, 143, 145, 146, 273, 276, 407, 291, 296, 298, 299, 305, 433, 439, 440, 441, 442, 316, 319, 447, 196, 324, 325, 77, 333, 211, 216, 91, 92, 224, 110, 112, 113, 371, 117, 119, 382, 457, 480]	[1, 0, 75, 18, 30, 105, 12, 154, 57, 170, 217, 39, 161, 10, 58, 93, 132, 233, 127, 136, 182, 195, 208, 13, 28, 171, 201, 17, 87, 90, 157, 158, 165, 173, 181, 188, 266, 315, 336, 53, 108, 123, 126, 134, 156, 180, 186, 239, 253, 257, 264, 265, 271, 297, 301, 303, 312, 318, 332, 335, 342, 383, 399, 418, 423, 430, 432, 8, 16, 23, 25, 34, 35, 36, 50, 51, 54, 60, 64, 65, 76, 78, 79, 80, 81, 84, 86, 88,…	1	0.240494	0.759506	0.799345	2.01256e-05	0.961579	0.00066829	0.905225	0.00787862	0	0	5	8	8	9	18	24	0	0	0	0	29	34	0	0	0	0	13	13	0	0	4	4	0	0	5	5	1
TMX3	ENSG00000166479.10	chr18	-	68689054	68691294	3AS	TRUE	0.00730354	3.16541e-05	[30, 40, 74, 28, 118, 22, 381, 277, 93, 353, 396, 270, 311, 101, 355, 405, 408, 421, 55, 70, 348, 95, 97, 365, 116, 373, 146, 531, 23, 538, 33, 420, 42, 426, 44, 52, 309, 438, 446, 582, 583, 585, 588, 589, 590, 83, 343, 88, 345, 346, 471, 94, 96, 352, 354, 375, 361, 106, 108, 112, 368, 370, 374, 506]	[18, 170, 143, 19, 274, 284, 397, 16, 39, 169, 362, 246, 256, 135, 139, 140, 173, 69, 214, 261, 144, 145, 285, 547, 167, 168, 425, 302, 305, 185, 187, 572, 465, 211, 222, 224, 491, 492, 114, 249, 510]	0.845411	0.636364	0.209047	0.245543	0.0345077	0.74389	0.0300979	0.467661	0.0948183	2	10	4	40	10	30	1	15	7	21	2	16	8	16	1	4	0	3	3	3	0	0	0	0	0	0	0	0	1
HELQ	ENSG00000163312.11	chr4	-	83447028	83448782	3AS	TRUE	0.00739168	3.21274e-05	[124, 43, 418, 568, 516, 133, 417, 38, 73, 513, 13, 536, 671, 422, 551, 425, 466, 494, 507, 514, 387, 525, 147, 278, 535, 537, 541, 542, 416, 544, 420, 547, 673, 556, 557, 47, 566, 442, 444, 450, 67, 578, 453, 454, 584, 344, 472, 474, 602, 94, 487, 490, 363, 623, 497, 502, 633, 511]	[0, 33, 16, 25, 28, 36, 75, 306, 134, 7, 56, 103, 61, 15, 57, 282, 78, 116, 137, 431, 21, 76, 201, 248, 284, 460, 468, 122, 142, 165, 217, 226, 346, 66, 81, 93, 153, 199, 204, 255, 281, 327, 475, 488, 505, 627, 40, 71, 74, 80, 107, 121, 130, 148, 155, 174, 187, 191, 230, 232, 252, 254, 256, 268, 359, 365, 377, 427, 448, 464, 503, 504, 2, 44, 48, 60, 63, 70, 82, 84, 114, 119, 129, 132, 143, 166, 1…	1	0.655639	0.344361	0.861587	0.00632844	0.972044	4.43012e-05	0.921031	0.00549288	27	41	60	72	95	101	87	113	36	48	62	70	46	48	3	3	7	8	1	1	1	1	8	8	0	0	0	0	3
GSAP	ENSG00000186088.16	chr7	-	77397415	77404558	ES	TRUE	0.00742857	3.2436e-05	[0, 8, 197, 2, 198, 38, 29, 82, 32, 36, 219, 55, 224, 231, 46, 336, 440, 41, 503, 541, 35, 199, 483, 374, 217, 512, 409, 237, 257, 1235, 53, 380, 1, 24, 54, 443, 651, 107, 110, 191, 545, 112, 168, 341, 1430, 20, 71, 95, 360, 456, 467, 1443, 158, 195, 210, 326, 568, 1502, 194, 305, 64, 111, 578, 1493, 72, 268, 797, 22, 128, 213, 478, 550, 592, 1290, 57, 361, 403, 15, 74, 340, 351, 1275, 44, 66, 14…	[94, 204, 67, 18, 133, 196, 422, 312, 736, 383, 392, 119, 477, 1280, 1398, 816, 466, 6, 9, 138, 297, 1467, 1598, 146, 1533, 214, 1330, 1356, 1369, 2156, 120, 188, 435, 469, 481, 484, 531, 921, 1141, 1550, 1643, 14, 19, 21, 30, 2135, 90, 108, 2157, 122, 136, 218, 379, 421, 448, 508, 528, 579, 597, 677, 735, 739, 806, 843, 962, 1118, 1336, 1428, 1440, 1580, 1637, 1671, 1680, 1693, 1699, 1719, 1724,…	0.699421	0.999028	0.299607	0.182497	0.0118406	0.110005	2.07264e-05	0.123118	0.00121515	32	297	84	866	67	711	22	482	42	295	59	355	48	365	8	86	3	8	7	12	8	36	1	2	0	0	0	1	3
BCL2L1	ENSG00000171552.14	chr20	-	31722330	31722617	3AS	FALSE	0.00742857	3.24712e-05	[1, 7, 6, 50, 54, 155, 36, 128, 15, 150, 156, 161, 39, 40, 57, 78, 79, 107, 109, 111]	[5, 10, 14, 95, 24, 30, 59, 76, 56, 70, 134, 82, 124, 132, 28, 35, 42, 44, 49, 55, 60, 102, 121, 126, 135, 136, 137, 16, 144, 147, 149, 151, 153, 160, 162, 163, 41, 48, 61, 67, 68, 69, 72, 77, 80, 84, 88, 89, 90, 91, 92, 94, 96, 97, 98, 99, 100, 103, 106, 110, 112, 117, 119, 122, 127]	0.0360934	0.0504587	0.0143653	0.837903	0.00335316	0.571137	0.00247468	0.724499	0.0198342	0	0	0	0	0	0	3	3	0	0	0	0	0	0	0	0	0	0	15	15	3	3	46	55	0	0	587	660	0
ARHGAP25	ENSG00000163219.12	chr2	+	68787956	68788488	IR	TRUE	0.0074605	3.27614e-05	[32, 248, 231, 305, 498, 643, 497, 641, 341, 705, 613, 672, 745, 630, 740, 673, 780, 81, 746, 764, 135, 700, 735, 750, 276, 792, 618, 721, 732, 739, 754, 774, 775, 789, 790, 815, 684, 689, 703, 704, 720, 728, 233, 777, 277, 803, 824, 993, 996, 1030, 530, 1055, 1057, 53, 629, 632, 634, 635, 650, 651, 653, 657, 658, 681, 692, 694, 696, 699, 707, 710, 718, 724, 737, 743, 758, 762, 779, 782, 791, 805…	[114, 126, 378, 664, 648, 711, 738, 1049, 201, 110, 387, 542, 422, 502, 18, 602, 734, 491, 624, 1012]	0.989991	0.693431	0.29656	0.061184	0.00425102	0.50243	0.107502	0.222414	0.0795679	4	39	12	154	27	239	11	379	0	70	0	5	11	53	0	2	0	8	0	19	0	19	0	20	0	0	0	15	0
TRMT13	ENSG00000122435.10	chr1	+	100140514	100140844	IR	TRUE	0.0074605	3.2795e-05	[8, 33, 102, 46, 86, 87, 190, 192, 81, 256, 43, 49, 53, 56, 59, 194, 119, 251, 258, 265, 24, 37, 44, 174, 60, 64, 65, 78, 211, 85, 216, 89, 217, 94, 97, 239, 245]	[62, 20, 106, 18, 17, 70, 139, 147, 104, 129, 52, 150, 151, 170, 172, 177, 209, 132, 133, 134, 138, 136, 143, 159, 160, 183, 191, 208, 82, 115, 128, 131, 259, 141, 144, 148, 152, 157, 36, 165, 168, 181, 187, 188, 189, 74, 202, 79, 207, 213, 92, 225, 229, 105, 232, 108, 236, 238, 267, 268, 271]	1	1	0	0.393772	0.0704078	0.869456	0.0188316	0.587535	0.105401	5	12	18	23	24	27	8	18	8	17	15	19	9	10	2	7	0	2	0	0	0	1	0	3	1	3	0	0	0
CHURC1	ENSG00000258289.8	chr14	+	64924126	64926006	3AS	TRUE	0.00753497	3.32154e-05	[2, 18, 6, 20, 36, 38, 40, 43, 22, 25, 47]	[5, 42]	0.0278884	1	0.972112	0.24839	0.00466861	0.0241215	0.00142594	0.147539	0.0188965	3	10	0	6	2	5	2	13	5	8	0	13	0	4	0	2	5	20	1	2	1	6	0	0	6	14	0	0	3
TMEM63A	ENSG00000196187.12	chr1	-	225848554	225848896	3AS	TRUE	0.00788819	3.48929e-05	[1, 73, 157, 16, 156, 71, 101, 25, 75, 6, 67, 78, 79, 151, 168, 127, 175, 181, 28, 77, 122, 146, 155, 177, 184, 234, 26, 31, 56, 64, 69, 90, 100, 111, 132, 149, 158, 176, 191, 196, 201, 208, 213, 10, 17, 27, 33, 39, 40, 58, 74, 76, 84, 98, 105, 114, 128, 169, 171, 179, 180, 185, 186, 189, 205, 209, 214, 220, 233, 243, 0, 2, 3, 4, 5, 7, 9, 11, 12, 18, 19, 20, 23, 32, 37, 43, 45, 48, 49, 50, 54, 55…	[8, 129, 119, 139, 36, 228, 231, 123, 13, 24, 30, 164, 38, 230, 239, 112, 117, 245, 120, 250]	0.411622	0.48	0.0683777	0.142207	0.00599185	0.0102035	0.000295152	0.0727584	0.0107781	0	0	4	23	4	15	5	23	0	0	0	0	2	48	0	2	0	2	4	16	0	1	0	17	0	0	6	11	0
PPOX	ENSG00000143224.18	chr1	+	161167234	161167338	IR	FALSE	0.00788819	3.49673e-05	[29, 16, 31, 103, 168, 88, 165, 176, 75, 83, 249, 21, 156, 293, 307, 67, 78, 247, 125, 256, 257, 269, 142, 275, 20, 22, 276, 24, 153, 280, 281, 157, 158, 33, 160, 162, 284, 167, 297, 298, 171, 299, 174, 305, 180, 309, 313, 316, 189, 318, 319, 196, 323, 328, 330, 206, 207, 208, 102, 248, 251, 127]	[0, 81, 25, 72, 54, 71, 70, 74, 82, 86, 92, 116, 4, 17, 44, 169, 53, 64, 77, 215, 106, 115, 131, 5, 133, 7, 134, 10, 139, 13, 141, 149, 278, 279, 155, 286, 159, 34, 38, 39, 40, 41, 42, 43, 294, 47, 48, 308, 310, 56, 186, 188, 61, 190, 194, 204, 333, 339, 212, 340, 87, 89, 218, 91, 221, 232, 111, 114, 242, 246, 119, 122, 124, 255]	1	1	0	0.346982	0.0455847	0.82762	0.00216367	0.583264	0.0881043	0	0	6	14	1	2	2	14	1	1	0	0	10	12	1	2	0	0	1	15	1	1	2	15	0	0	4	18	0
NASP	ENSG00000132780.17	chr1	+	45591270	45604935	3AS	FALSE	0.00794506	3.53447e-05	[10, 18, 263, 96, 229, 200, 329, 338]	[70, 105, 60, 58, 87, 65, 82, 320, 92, 69, 71, 349, 95, 363, 255, 270, 142, 143, 148, 278, 279, 154, 43, 300, 317, 62, 328, 74, 331, 78, 336, 81, 341, 342, 351, 352, 98, 99, 364, 365, 240, 246]	0.037037	1	0.962963	0.677868	0.0232885	0.0858415	4.42399e-05	0.484354	0.0924146	6	6	1	1	1	2	3	3	1	3	0	1	0	1	5	5	2	3	3	3	0	0	3	10	0	0	0	0	5
TCF7L2	ENSG00000148737.17	chr10	+	113146097	113150997	3AS	FALSE	0.00794506	3.54156e-05	[1, 13, 16, 2, 42, 67, 14, 24, 8, 15, 39, 41, 56, 71, 7, 44, 102, 89, 98, 101, 107, 108, 116, 118, 3, 6, 27, 45, 51, 77, 78, 103, 106, 110, 111, 132, 142, 4, 5, 10, 11, 12, 17, 26, 28, 33, 36, 38, 40, 43, 46, 48, 49, 50, 52, 53, 54, 58, 59, 60, 61, 62, 64, 65, 69, 70, 72, 73, 74, 75, 76, 81, 83, 85, 87, 91, 92, 93, 96, 104, 109, 112, 113, 115, 119, 121, 126, 129, 143, 144, 150, 151, 152, 154]	[0, 18, 19, 133, 34, 135, 136, 20, 25, 35, 130, 21, 23, 47, 63, 66, 117, 128, 134, 9, 139, 140, 141, 145, 22, 147, 153, 31, 32, 37, 55, 57, 68, 80, 82, 84, 86, 88, 90, 114, 120, 123, 124]	0.155235	0.126214	0.0290211	0.42167	8.11097e-05	0.110032	0.00123303	0.292428	0.0344962	0	0	0	0	0	0	0	1	0	0	0	0	0	0	0	0	1	1	2	3	2	3	11	19	0	0	3	3	0
UBAP1	ENSG00000165006.14	chr9	+	34220948	34234215	ES	TRUE	0.00809745	3.61948e-05	[0, 8, 3, 83, 22, 5, 42, 21, 12, 1, 47, 65, 101, 77, 85, 112, 4, 9, 91, 132, 80, 90, 31, 60, 78, 140, 28, 34, 38, 45, 66, 92, 116, 136, 145, 202, 205, 7, 15, 16, 32, 46, 56, 59, 67, 72, 95, 96, 109, 118, 127, 134, 143, 163, 191, 195, 200, 207, 225, 10, 13, 17, 23, 25, 26, 27, 33, 35, 36, 39, 40, 41, 43, 48, 52, 53, 61, 64, 68, 71, 73, 74, 75, 76, 79, 81, 87, 98, 99, 100, 102, 103, 105, 110, 113, …	[19, 89, 55, 86, 29, 146, 63, 150, 138, 157, 166, 129, 137, 151, 24, 160, 161, 167, 169, 175, 177, 50, 180, 186, 69, 82, 84, 228, 108]	0.0866126	0.925094	0.838481	0.0546115	0.00118753	0.0110188	0.00010755	0.033137	0.001061	0	19	3	44	6	130	21	148	2	23	0	36	4	89	0	20	2	30	78	561	1	77	64	606	0	0	4	261	3
TFEC	ENSG00000105967.16	chr7	-	116030632	116030762	AFJ	TRUE	0.00815398	3.66489e-05	[17, 7, 23, 21, 1, 10, 31, 38, 9, 6, 16, 84, 18, 33, 41, 71, 94, 30, 37, 8, 26, 39, 47, 52, 77, 2, 12, 27, 28, 36, 46, 58, 80, 90, 135, 178, 0, 32, 42, 48, 53, 57, 62, 74, 75, 81, 87, 88, 93, 99, 110, 111, 112, 113, 121, 140, 141, 143, 164, 177, 179, 198, 3, 4, 5, 11, 13, 14, 15, 19, 20, 22, 24, 25, 29, 34, 35, 40, 43, 44, 45, 49, 50, 51, 54, 55, 56, 59, 63, 64, 65, 66, 67, 68, 69, 70, 72, 73, 76…	[185, 184, 186, 202, 203, 192, 195, 200, 224, 190, 217, 227, 191, 205, 207, 219, 229, 231, 232, 243, 187, 188, 189, 193, 194, 196, 197, 199, 204, 206, 208, 210, 211, 212, 213, 214, 215, 216, 218, 220, 221, 222, 223, 225, 226, 228, 230, 233, 235, 236, 237, 238, 239, 240, 241, 242, 245, 246, 247, 248, 249, 250, 251]	0.258984	0.214502	0.0444824	0.885808	0.00460043	0.485878	0.207792	0.60135	0.171231	0	0	0	0	2	2	1	1	0	0	0	0	0	0	0	0	13	14	9	9	28	29	4	5	21	27	4	5	12
MS4A1	ENSG00000156738.18	chr11	+	60464344	60464695	IR	TRUE	0.00815398	3.65612e-05	[36, 192, 438, 589, 181, 321, 612, 552, 567, 577, 578, 517, 580, 585, 588]	[4, 29, 13, 111, 1, 33, 0, 70, 30, 112, 223, 285, 97, 136, 261, 541, 255, 290, 197, 326, 474, 297, 434, 512, 53, 132, 248, 269, 280, 308, 312, 411, 449, 513, 546, 573, 575, 671, 215, 301, 309, 318, 327, 408, 471, 478, 539, 592, 598, 607, 620, 630, 653, 213, 229, 236, 265, 334, 359, 369, 382, 399, 405, 406, 432, 433, 450, 472, 492, 494, 501, 502, 508, 714, 717, 722, 723, 724, 744, 785]	1	0.922975	0.0770252	0.729695	0.0074383	0.963548	0.00093671	0.88224	0.0163291	58	71	111	142	257	356	138	218	76	135	76	117	15	17	9	10	0	0	0	0	0	0	0	0	0	0	0	0	0
ZFYVE27	ENSG00000155256.17	chr10	+	97743164	97744728	3AS	TRUE	0.00817506	3.68446e-05	[0, 1, 4, 17, 19, 16, 2, 18, 84, 95, 31, 48, 51, 86, 26, 47, 66, 3, 5, 7, 11, 20, 27, 32, 36, 37, 39, 40, 44, 50, 52, 54, 57, 61, 65, 67, 74, 75, 83, 85, 88, 90, 97, 105, 113, 115]	[28, 25, 21, 99, 102, 103, 106, 109, 82, 59]	0.202532	1	0.797468	0.166553	0.00105636	0.00521268	6.76129e-07	0.0923164	0.0179211	0	0	0	0	0	0	0	10	1	1	0	0	0	5	0	0	0	0	0	0	0	0	1	10	0	0	2	3	0
UQCC1	ENSG00000101019.22	chr20	-	35302579	35304069	ALJ	TRUE	0.00828875	3.74593e-05	[10, 26, 18, 24, 40, 49, 28, 44, 5, 15, 16, 88, 38, 19, 13, 85, 9, 136, 107, 115, 134, 177, 17, 39, 43, 184, 72, 79, 112, 14, 48, 56, 74, 89, 94, 152, 158, 161, 12, 41, 50, 54, 55, 57, 64, 66, 73, 76, 80, 92, 101, 108, 142, 146, 154, 162, 164, 165, 167, 189, 208, 215, 218, 219, 221, 223, 224, 7, 11, 20, 25, 27, 33, 37, 42, 45, 46, 47, 51, 52, 53, 58, 59, 60, 61, 62, 63, 65, 69, 70, 71, 75, 77, 78…	[0, 8, 21, 23, 155, 97, 118, 119, 133, 138, 139, 29, 31, 34, 178, 180, 187, 194, 195, 201, 211, 1, 2, 3, 4, 132, 6, 141, 22, 149, 151, 156, 30, 32, 35, 36, 173, 179, 186, 192, 193, 67, 68, 196, 200, 202, 210, 212, 213, 214, 98, 103, 106, 226]	0.0903614	0.0669516	0.0234099	0.201404	0.0257767	0.519574	0.0479287	0.356242	0.0604026	4	133	16	93	39	132	12	175	12	75	32	59	78	119	38	99	2	13	1	9	7	13	2	6	0	0	0	0	0
ABCG1	ENSG00000160179.19	chr21	+	42219140	42219304	AFJ	TRUE	0.00836421	3.79037e-05	[10, 9, 16, 23, 35, 50, 8, 51, 73, 86, 14, 15, 17, 21, 24, 25, 34, 40, 41, 57, 60, 65, 71, 78, 85, 87]	[0, 1, 3, 18, 2, 6, 26, 11, 32, 13, 33, 4, 29, 42, 12, 19, 30, 56, 75, 77, 28, 48, 58, 20, 36, 38, 45, 59, 62, 69, 81, 83, 5, 7, 22, 27, 31, 37, 39, 43, 44, 46, 47, 49, 52, 53, 54, 55, 61, 63, 64, 66, 67, 68, 70, 72, 74, 76, 79, 80, 82, 84]	0.547619	0.0368824	0.510737	0.782542	0.0490065	0.954048	7.83027e-05	0.900376	0.00812039	0	1	30	33	56	58	54	58	1	4	1	8	59	62	0	0	1	1	19	19	5	6	7	7	0	0	14	14	0
TPX2	ENSG00000088325.16	chr20	+	31739621	31757406	ES	TRUE	0.00840171	3.81773e-05	[5, 13, 118, 39, 23, 147, 154, 155, 156, 157, 159, 193, 200, 74, 206, 207, 82, 89, 90]	[1, 3, 11, 4, 40, 7, 25, 10, 12, 18, 29, 30, 41, 57, 58, 125, 124, 144, 92, 130, 143, 146, 15, 26, 31, 42, 44, 86, 103, 127, 131, 141, 142, 160, 161, 169, 199, 17, 19, 27, 28, 35, 43, 46, 47, 49, 51, 54, 56, 59, 60, 67, 68, 69, 71, 72, 75, 76, 79, 80, 83, 85, 94, 95, 97, 98, 99, 102, 104, 105, 106, 107, 108, 109, 111, 113, 114, 120, 126, 128, 129, 136, 139, 140, 145, 152, 153, 163, 165, 167, 170,…	0.0289855	0.0411523	0.0121668	0.877076	0.0040972	0.951865	1.60795e-05	0.910941	0.00303723	0	0	2	2	2	2	3	3	0	0	4	4	1	1	1	1	57	65	137	170	4	4	305	357	0	0	31	38	109
ZC3H11A	ENSG00000058673.17	chr1	+	203795794	203816925	ME	TRUE	0.00879184	4.00586e-05	[139, 127, 230, 226, 436, 339, 144, 579, 601, 326, 342, 529, 665, 161, 553, 684, 578, 713, 770, 771, 778, 782, 784, 787, 531, 791, 796, 669, 414, 804, 677, 698, 186, 590, 724, 728, 740, 614, 751, 240, 753, 767]	[10, 33, 157, 62, 470, 321, 776, 396, 164, 701, 702, 475, 755, 773, 777, 779, 790, 537, 671, 415, 676, 689, 191, 575, 733, 612, 106, 634, 635]	0.66759	0.0619195	0.605671	0.348299	0.0204071	0.67707	0.00755583	0.481797	0.0441941	1	22	18	44	31	52	16	59	11	26	3	12	7	23	4	5	0	1	3	10	3	11	16	48	0	0	0	1	2
FNBP4	ENSG00000285182.2	KZ559109.1	-	164586	164903	IR	FALSE	0.00897671	4.10118e-05	[70, 13, 3, 90, 116, 100, 57, 65, 91, 204, 68, 168, 82, 106, 169, 188, 345, 388, 11, 30, 74, 145, 200, 220, 241, 332, 338, 373, 38, 47, 73, 85, 87, 92, 97, 118, 122, 125, 133, 134, 135, 139, 147, 149, 165, 171, 173, 179, 240, 254, 257, 260, 262, 270, 275, 285, 287, 297, 298, 299, 305, 313, 330, 334, 340, 344, 349, 355, 362, 366, 376, 377, 383, 387, 389, 394, 395, 396, 403, 407, 415, 432, 451, 452…	[6, 9, 4, 17, 23, 19, 148, 203, 35, 32, 146, 67, 93, 71, 192, 215, 40, 178, 166, 22, 27, 108, 272, 131, 409, 31, 182, 207, 39, 248, 259, 206, 277, 321, 378, 20, 167, 196, 212, 214, 236, 256, 273, 380, 421, 42, 113, 119, 121, 123, 140, 158, 184, 210, 223, 225, 232, 234, 239, 243, 258, 282, 295, 300, 324, 343, 367, 384, 401, 408, 474, 482, 5, 12, 15, 16, 25, 28, 36, 51, 52, 53, 55, 61, 66, 69, 72, …	0.992147	0.920921	0.0712257	0.592002	0.0448257	0.765539	1.21945e-05	0.701966	0.0152268	1	3	47	77	42	62	64	93	5	13	0	5	40	56	0	1	0	0	0	1	1	2	11	11	0	0	2	2	0
TRIM37	ENSG00000108395.14	chr17	-	59001714	59012327	3AS	FALSE	0.00908199	4.1605e-05	[3, 104, 0, 5, 45, 7, 25, 81, 8, 32, 107, 20, 229, 313, 54, 114, 38, 106, 16, 167, 26, 119, 506, 519, 151, 234, 239, 326, 334, 359, 385, 406, 472, 505, 43, 87, 89, 102, 131, 150, 177, 200, 458, 17, 534, 62, 76, 77, 125, 128, 144, 154, 213, 324, 337, 358, 389, 436, 459, 11, 27, 548, 557, 58, 75, 80, 85, 110, 117, 132, 139, 148, 155, 158, 164, 192, 215, 223, 226, 230, 231, 243, 296, 304, 312, 320, …	[10, 105, 40, 44, 118, 14, 48, 66, 111, 328, 49, 305, 317, 329, 479, 42, 143, 209, 322, 332, 356, 41, 555, 330, 381, 475, 547, 71, 152, 169, 183, 216, 241, 250, 262, 327, 348, 382, 387, 393, 397, 400, 443, 444, 460, 464, 465, 473, 477, 492, 515, 517, 518, 18, 21, 533, 540, 544, 34, 37, 553, 47, 562, 56, 569, 65, 70, 108, 124, 130, 134, 135, 137, 157, 160, 161, 162, 165, 181, 187, 197, 201, 204, 2…	0.354487	0.432532	0.0780452	0.367529	0.0100242	0.150218	0.00433301	0.256449	0.0221471	1	4	27	62	40	86	31	57	5	10	5	13	4	26	1	3	3	4	0	5	0	3	0	3	0	0	0	0	3
PCYT1A	ENSG00000161217.12	chr3	-	196234864	196237791	5AS	TRUE	0.0091516	4.21024e-05	[2, 56, 17, 107, 155, 106, 118, 127, 139, 205, 240, 144, 166, 256, 255, 290, 333, 34, 60, 105, 115, 119, 130, 131, 140, 153, 208, 212, 225, 233, 292, 321, 325, 334, 369, 12, 58, 108, 122, 143, 147, 157, 163, 179, 182, 183, 195, 201, 202, 210, 211, 213, 221, 222, 224, 232, 236, 237, 241, 242, 251, 252, 264, 268, 269, 280, 297, 312, 314, 318, 322, 323, 324, 337, 338, 339, 342, 345, 351, 352, 354, 3…	[6, 110, 3, 117, 198, 29, 142, 271, 146, 177, 178, 234, 270, 150, 152, 162, 305, 320, 193, 200, 209, 220, 114, 126, 132, 141, 149, 281, 158, 165, 293, 168, 169, 298, 48, 180, 184, 313, 61, 194, 196, 197, 199, 207, 226, 360, 109, 239, 116, 120, 253, 372]	1	1	0	0.215108	5.56596e-05	0.406258	0.000435588	0.30295	0.00836086	2	4	3	20	14	52	6	29	1	7	2	12	9	24	0	4	0	2	0	9	2	5	4	23	0	3	1	5	0
OFD1	ENSG00000046651.15	chrX	+	13762444	13767126	ES	FALSE	0.0091516	4.21498e-05	[4, 7, 9, 14, 25, 12, 333, 3, 15, 34, 395, 376, 75, 92, 5, 51, 60, 300, 78, 169, 191, 91, 212, 536, 654, 32, 316, 689, 285, 482, 29, 49, 506, 758, 1216, 35, 67, 69, 88, 95, 118, 178, 218, 219, 1068, 40, 84, 114, 119, 122, 139, 166, 173, 340, 358, 564, 582, 583, 705, 976, 1007, 1037, 1327, 1337, 265, 484, 847, 974, 1230, 1231, 24, 140, 210, 220, 266, 352, 366, 424, 466, 491, 499, 538, 740, 772, 80…	[11, 10, 8, 112, 48, 152, 18, 28, 41, 17, 108, 97, 141, 128, 247, 105, 94, 64, 124, 472, 232, 148, 229, 283, 36, 181, 350, 16, 164, 6, 52, 82, 137, 177, 238, 267, 251, 275, 289, 359, 367, 1, 87, 22, 197, 541, 305, 115, 255, 393, 63, 156, 371, 50, 100, 228, 280, 412, 432, 605, 710, 33, 79, 189, 198, 298, 355, 497, 525, 2, 13, 55, 65, 98, 126, 168, 239, 320, 56, 136, 388, 407, 433, 460, 481, 528, 1…	0.465722	0.580069	0.114347	0.592903	0.0442971	0.724231	0.00411466	0.655673	0.0273336	233	302	590	738	461	630	322	463	196	275	180	261	208	288	62	84	13	16	1	25	26	33	51	153	0	3	4	8	15
RBM39	ENSG00000131051.24	chr20	-	35725155	35731940	ME	TRUE	0.00950568	4.3898e-05	[82, 97, 150, 197, 1159, 1552, 1553, 1810, 1493, 110, 1160, 1551, 939, 1840, 690, 1467, 1485, 1487, 1621, 230, 1531, 1535, 1847]	[3, 19, 56, 218, 212, 79, 112, 365, 204, 371, 1158, 782, 48, 159, 1186, 1203, 1207, 794, 1050, 89, 1135, 1249, 340, 387, 493, 516, 1032, 1033, 1556, 1051, 28, 1053, 1565, 1059, 1064, 566, 77, 618, 1136, 1657, 1665, 671, 166, 1728, 1223, 1229, 207, 1232, 1233, 211, 733, 1246, 1254, 1258, 749, 1284, 263, 1803, 1806, 1298, 1299, 283, 1317, 816, 1330, 1843, 842, 1413, 1415, 905, 910, 399, 1427, 922, …	0.457143	0.494424	0.0372809	0.747533	0.0891209	0.974332	3.59482e-06	0.848944	0.0504897	10	10	27	28	13	13	20	27	14	14	40	40	11	11	18	18	2	2	1	8	0	6	6	24	0	0	0	0	2
MAP3K7	ENSG00000135341.18	chr6	-	90513578	90513818	ALJ	TRUE	0.00956481	4.42892e-05	[1, 0, 14, 11, 6, 9, 28, 7, 19, 21, 149, 125, 132, 101, 20, 24, 23, 96, 88, 91, 140, 44, 70, 84, 27, 134, 35, 57, 347, 370, 2, 29, 42, 50, 142, 150, 99, 139, 199, 10, 18, 122, 127, 147, 188, 374, 31, 56, 79, 86, 111, 166, 38, 54, 66, 83, 201, 317, 39, 53, 77, 100, 133, 137, 167, 185, 281, 373, 13, 110, 116, 151, 152, 179, 183, 184, 187, 206, 210, 212, 220, 241, 321, 3, 8, 16, 59, 61, 94, 109, 118…	[15, 43, 69, 5, 62, 64, 126, 129, 12, 37, 97, 130, 267, 293, 308, 312, 4, 25, 223, 224, 255, 289, 34, 128, 145, 208, 222, 246, 272, 292, 307, 311, 315, 354, 384, 385, 390, 419, 45, 48, 51, 71, 72, 75, 105, 144, 160, 181, 189, 209, 226, 227, 243, 244, 245, 254, 264, 265, 266, 268, 270, 271, 273, 274, 275, 276, 290, 291, 309, 310, 313, 314, 316, 326, 327, 329, 330, 331, 335, 336, 337, 338, 339, 348…	0.418395	0.997706	0.579311	0.124836	0.00357115	0.0460648	0.000953462	0.0828906	0.00358906	15	89	36	170	49	239	38	159	26	148	15	184	23	183	3	45	2	32	3	24	5	28	15	79	0	5	2	8	4
EIF2S3	ENSG00000130741.11	chrX	+	24073263	24074349	IR	TRUE	0.00959845	4.45635e-05	[50, 483, 455, 360, 472]	[24, 207, 228, 10, 367, 249, 129, 345, 349, 243, 135, 161, 54, 57, 314, 320, 352, 101, 107, 242, 384, 391, 398, 147, 148, 157, 293, 298, 171, 303, 434, 182, 310, 311, 189, 65, 67, 73, 85, 88, 90, 237, 369, 376]	0.0566038	1	0.943396	0.572034	0.0455563	0.967965	0.0101713	0.707067	0.0732876	2	8	4	4	6	7	4	9	7	9	2	2	8	9	0	1	1	2	0	1	1	4	0	0	0	0	0	0	0
DDX58	ENSG00000107201.10	chr9	-	32526060	32526324	AFJ	TRUE	0.00967124	4.50208e-05	[1, 146, 35, 77, 57, 81, 207, 37, 173, 190, 191, 3, 62, 68, 83, 97, 116, 165, 181, 189, 210, 269, 289, 346, 351, 353, 4, 11, 25, 84, 94, 96, 101, 107, 114, 153, 160, 162, 164, 168, 174, 178, 184, 186, 187, 192, 193, 194, 198, 199, 200, 201, 202, 204, 205, 209, 213, 219, 232, 240, 241, 247, 255, 285, 286, 294, 295, 301, 303, 310, 315, 329, 333, 335, 345, 349, 350, 352, 356, 359, 361, 365]	[0, 34, 17, 40, 6, 32, 19, 36, 47, 9, 7, 28, 48, 33, 117, 21, 59, 75, 132, 42, 137, 2, 91, 141, 143, 50, 104, 136, 154, 182, 249, 30, 41, 52, 79, 90, 103, 145, 10, 15, 24, 38, 44, 54, 61, 64, 67, 72, 85, 113, 129, 133, 156, 172, 176, 216, 259, 276, 280, 298, 342, 5, 8, 26, 27, 39, 46, 53, 63, 71, 80, 87, 95, 102, 115, 121, 130, 131, 135, 144, 155, 157, 212, 220, 227, 228, 230, 238, 250, 251, 253,…	0.874214	0.31768	0.556534	0.760521	0.0512713	0.948554	0.000375421	0.857595	0.0205372	37	37	88	88	99	106	64	66	47	53	34	35	60	64	5	7	23	25	0	6	14	18	1	6	0	2	1	2	8
AC022400.6	ENSG00000279088.1	chr10	-	73742964	73743211	ALJ	TRUE	0.00995363	4.64583e-05	[0, 7, 1, 9, 4, 10, 6, 11, 3, 5, 8, 12, 13, 17]	[2, 15, 16, 14]	1	1	0	0.406375	0.0868336	0.072388	0.0147144	0.235481	0.0775874	0	3	1	13	0	13	0	6	8	32	0	22	3	25	6	14	2	2	1	3	6	14	2	5	141	142	7	10	26
OXA1L	ENSG00000155463.14	chr14	+	22770278	22770460	IR	FALSE	0.0101942	4.7707e-05	[3, 12, 47, 52, 19, 34, 54, 202, 90, 125, 158, 176, 200, 140, 187, 203, 129, 132, 10, 144, 150, 45, 191, 193, 67, 195, 196, 71, 216, 219, 222, 95, 105, 124, 127]	[37, 0, 13, 6, 1, 25, 29, 8, 21, 9, 18, 15, 33, 24, 16, 32, 7, 23, 5, 20, 22, 60, 4, 38, 51, 58, 31, 59, 14, 36, 27, 56, 96, 83, 30, 75, 39, 69, 86, 101, 50, 53, 61, 63, 65, 164, 11, 26, 87, 88, 112, 141, 148, 167, 175, 17, 40, 49, 62, 79, 91, 92, 103, 108, 115, 119, 121, 135, 139, 147, 155, 163, 174, 189, 42, 48, 57, 64, 72, 76, 81, 85, 94, 98, 99, 106, 113, 116, 118, 126, 157, 159, 166, 180, 18…	0.110521	0.983792	0.873271	0.725972	0.0158325	0.526653	0.0853118	0.622574	0.0545173	40	50	178	198	182	204	187	204	74	95	51	73	83	101	66	97	10	11	23	52	28	59	47	58	1	1	10	16	35
CDC7	ENSG00000097046.13	chr1	+	91501303	91501653	3AS	TRUE	0.010223	4.79682e-05	[18, 79, 225, 56, 216, 97, 35, 280, 294, 145, 19, 281, 285, 159]	[57, 175, 297, 125, 295, 77, 301, 283]	0.0753425	0.0810811	0.00573862	0.283514	6.92544e-05	0.033326	0.00995611	0.180782	0.0185217	2	2	0	0	0	2	0	0	0	0	0	0	0	1	0	0	0	2	0	0	0	1	0	0	0	0	0	0	2
DENND4A	ENSG00000174485.16	chr15	-	65697383	65701050	ES	FALSE	0.0103675	4.88549e-05	[3, 15, 106, 149, 36, 164, 44, 11, 41, 19, 111, 8, 91, 131, 54, 187, 112, 26, 246, 5, 93, 163, 174, 201, 310, 345, 159, 170, 183, 185, 46, 95, 101, 150, 377, 456, 98, 100, 113, 166, 177, 216, 226, 257, 368, 455, 463, 464, 466, 532, 38, 45, 53, 77, 97, 110, 179, 181, 182, 209, 215, 231, 247, 261, 292, 335, 342, 370, 395, 653, 7, 14, 18, 47, 49, 50, 57, 68, 79, 83, 92, 94, 96, 102, 108, 109, 114, 1…	[2, 1, 51, 219, 21, 39, 162, 136, 365, 583, 85, 341, 520, 562, 564, 80, 165, 245, 373, 493, 526, 530, 531, 37, 48, 569, 58, 574, 64, 580, 74, 586, 623, 650, 657, 214, 303, 306, 325, 384, 10, 560, 52, 55, 571, 63, 575, 576, 579, 71, 73, 584, 585, 602, 105, 619, 622, 633, 129, 138, 655, 658, 147, 659, 154, 172, 180, 235, 236, 244, 260, 263, 266, 282, 286, 311, 312, 324, 336, 337, 346, 356, 362, 363…	0.378621	0.271429	0.107192	0.24823	0.0224502	0.108171	5.41525e-06	0.18029	0.0143523	10	86	15	74	10	91	13	87	0	24	21	50	3	39	0	7	2	7	4	6	2	10	12	53	0	0	0	5	4
MALAT1	ENSG00000251562.8	chr11	+	65500814	65500911	IR	TRUE	0.0103675	4.89023e-05	[11, 8, 52, 106, 127, 25, 156, 48, 133, 139, 17, 182, 94, 99, 129, 130, 15, 147, 23, 154, 158, 159, 163, 164, 166, 41, 42, 43, 44, 171, 177, 51, 185, 186, 187, 88, 105, 110, 124]	[20, 22, 12, 18, 47, 57, 107, 128, 10, 67, 72, 83, 87, 101, 134, 6, 13, 19, 31, 33, 165, 39, 168, 170, 172, 175, 49, 53, 54, 183, 61, 70, 71, 75, 78, 85, 86, 95, 97, 115, 126]	1	1	0	0.471403	0.00159249	1		0.505068	0.00810238	8	17	1	6	10	15	20	47	1	2	1	2	1	2	0	0	1	4	1	6	2	5	2	4	0	0	0	0	1
PSME3IP1	ENSG00000172775.17	chr16	-	57178852	57185820	ES	TRUE	0.010619	5.02195e-05	[29, 11, 64, 6, 44, 42, 35, 160, 203, 166, 186, 270, 12, 106, 126, 140, 180, 184, 338, 56, 148, 176, 198, 260, 318, 320, 100, 143, 314, 61, 167, 168, 182, 209, 227, 245, 272, 292, 304, 315, 327, 337, 348, 375, 438, 447, 54, 63, 68, 83, 91, 101, 102, 112, 114, 119, 145, 146, 147, 150, 158, 165, 171, 173, 174, 177, 178, 211, 216, 222, 232, 233, 247, 248, 254, 259, 274, 278, 291, 328, 351, 352, 357,…	[266, 284, 329, 311, 332, 287, 297, 309, 312, 188, 376, 268, 404, 298, 300, 303, 431, 436, 187, 189, 196, 452, 335, 80, 342, 347, 476, 477, 350, 478, 481, 483, 486, 487, 104, 488, 359, 367, 373, 252, 489]	0.460733	0.262295	0.198438	0.149647	0.00274238	0.0223746	0.00087401	0.0865222	0.00687878	3	11	4	28	7	58	11	50	3	23	2	18	5	35	0	4	0	2	0	7	1	11	2	5	0	0	0	7	1
ABCC5	ENSG00000114770.17	chr3	-	183984894	183987769	ES	FALSE	0.0106416	5.04577e-05	[10, 88, 118, 102]	[13, 82, 94, 22, 147, 112, 130, 136, 151, 163, 46, 61, 120, 129, 131, 12, 140, 155, 156, 162, 164, 165, 47, 49, 62, 63, 74, 96, 116, 125, 126]	0.0540541	0.204461	0.150407	0.971681	0.00376786	0.709007	0.028324	0.85597	0.0396129	8	8	2	3	7	7	7	7	4	4	7	7	3	5	5	5	4	4	5	5	5	5	3	3	0	0	0	0	14
UBA7	ENSG00000182179.13	chr3	-	49811455	49811869	3AS	TRUE	0.010704	5.08858e-05	[1, 0, 75, 72, 18, 20, 30, 105, 164, 12, 154, 57, 217, 39, 10, 83, 93, 132, 169, 233, 44, 55, 127, 136, 160, 182, 208, 237, 339, 28, 167, 201, 206, 307, 349, 41, 85, 90, 158, 159, 165, 166, 173, 174, 181, 188, 190, 236, 266, 315, 6, 21, 43, 52, 53, 71, 89, 98, 108, 124, 134, 156, 180, 185, 186, 191, 194, 219, 238, 239, 253, 260, 265, 271, 297, 301, 303, 317, 318, 332, 335, 342, 346, 358, 383, 387…	[58, 13, 157, 431, 336, 96, 257, 392, 423, 310, 312, 330, 123, 130, 4, 389, 7, 135, 9, 391, 393, 141, 144, 145, 146, 19, 147, 276, 279, 153, 421, 294, 433, 306, 179, 308, 309, 438, 313, 316, 319, 320, 78, 88, 224, 248, 99, 104, 363, 110, 120, 122, 125, 469, 476, 480]	0.322307	1	0.677693	0.169268	0.00507069	0.0302299	0.000252797	0.084905	0.00645043	0	0	1	8	0	8	11	30	0	0	0	0	3	33	0	0	0	0	0	17	0	0	1	4	0	0	2	7	0
CCDC18-AS1	ENSG00000223745.8	chr1	-	93337471	93338373	5AS	TRUE	0.01093	5.20952e-05	[684, 1211, 981, 1127, 1299, 278, 1429, 430, 1212, 501, 249, 1411, 147, 1435, 1446, 1213, 1219, 1115, 1499, 483, 1126, 1282, 1415, 1160, 777, 1292, 1295, 1300, 1305, 671, 1442, 165, 1333, 1341, 1088, 1218, 1093, 1356, 1740, 1745, 1106, 979, 1239, 1367, 1248, 485, 1125, 1384, 1131, 1262, 1263, 1390, 1269, 1277]	[790, 267, 466, 1360, 1372, 253, 642, 899, 1671, 586, 975, 691, 660, 154, 1019]	1	1	0	0.0653941	0.00620504	0.554622	0.00531012	0.289787	0.0671113	0	15	0	26	4	13	1	19	1	9	0	3	0	1	0	2	0	0	0	0	0	0	0	1	0	0	0	0	0
NFE2L2	ENSG00000116044.16	chr2	-	177230310	177232008	ALJ	TRUE	0.0111439	5.3665e-05	[8, 11, 21, 56, 27, 63, 41, 64, 55, 22, 69, 14, 116, 80, 28, 53, 73, 119, 84, 122, 92, 38, 52, 54, 75, 81, 86, 87, 94, 110, 118, 158, 187, 198, 3, 6, 12, 15, 26, 42, 58, 65, 67, 78, 90, 91, 99, 105, 107, 111, 121, 123, 126, 129, 133, 134, 135, 139, 140, 141, 145, 149, 151, 154, 156, 160, 163, 164, 166, 169, 170, 171, 180, 182, 185, 186, 188, 190, 194, 195, 199, 203, 204, 209, 210, 211]	[1, 4, 10, 0, 9, 30, 19, 40, 7, 5, 25, 70, 50, 32, 57, 16, 48, 74, 36, 117, 85, 109, 71, 2, 13, 23, 29, 33, 43, 47, 62, 83, 106, 124, 136, 167, 39, 45, 46, 60, 72, 76, 82, 103, 125, 152, 155, 172, 177, 17, 18, 20, 24, 31, 34, 35, 37, 44, 49, 51, 59, 61, 66, 68, 77, 88, 89, 93, 95, 96, 97, 98, 100, 101, 102, 104, 108, 112, 113, 114, 115, 120, 127, 128, 130, 131, 132, 137, 138, 142, 143, 144, 146, …	0.029361	0.0561239	0.0267629	0.897936	0.00138623	0.948715	0.00037354	0.925089	0.00134742	169	192	99	108	383	459	186	216	473	512	137	148	185	206	49	52	61	64	78	80	92	98	16	19	1	1	59	65	61
HIF1A	ENSG00000100644.17	chr14	+	61738373	61744704	3AS	TRUE	0.0111439	5.36561e-05	[56, 31, 74, 236, 626, 405, 440, 98, 1148, 1162, 277, 410, 691, 180, 698, 706, 86, 737, 873, 243]	[44, 181, 204, 684, 264, 106, 291, 141, 818, 111, 836, 370, 389, 147, 32, 747, 109, 764, 639, 777, 138, 172, 1067, 964, 981, 728, 756, 907, 908, 911, 767, 918, 924, 1053, 672, 930, 804, 42, 700, 828, 831, 838, 860, 734, 735, 736, 864, 990, 991, 741, 358, 752, 1009, 757, 374, 1013]	1	0.942466	0.0575342	0.712816	0.0147782	0.292887	0.0478097	0.539361	0.0631266	0	2	4	7	15	26	3	3	24	28	1	1	3	10	0	0	5	5	18	29	23	34	144	158	0	0	3	4	21
HLA-A	ENSG00000206503.13	chr6	+	29943026	29944121	3AS	TRUE	0.0111439	5.35329e-05	[7, 115, 203, 15, 120, 262, 263, 264, 265]	[24, 9, 18, 40, 74, 154, 155, 86, 165, 43, 179, 167, 44, 234, 159, 164, 168, 171, 172, 188, 146, 153, 152, 177, 92, 117, 256, 259, 157, 31, 163, 39, 170, 180, 182, 184, 185, 187, 60, 191, 192, 196, 198, 89, 114, 247, 254]	0.02	0.98505	0.96505	0.975334	2.78902e-07	0.521086	0.0774871	0.783139	0.066875	0	0	0	0	0	0	0	0	0	0	0	0	34	34	12	13	0	0	0	0	6	6	406	417	0	0	34	34	1
TMEM14C	ENSG00000111843.14	chr6	+	10723241	10724555	IR	TRUE	0.0111439	5.33134e-05	[4, 32, 10, 26, 27, 28]	[1, 3, 9, 16, 2, 14, 15, 17]	0.0425532	1	0.957447	0.258125	0.0958652	0.812505	0.152336	0.505807	0.179263	0	1	5	6	1	1	0	0	0	0	0	1	6	6	0	2	0	5	1	6	0	1	1	10	0	0	0	0	1
MECOM	ENSG00000085276.19	chr3	-	169093102	169095075	3AS	TRUE	0.0111463	5.38145e-05	[5, 4, 3, 1, 7, 0, 21, 2, 8, 22, 9, 20, 34, 43, 23, 36, 73, 19, 27, 53, 6, 10, 12, 13, 18, 24, 31, 32, 38, 40, 41, 46, 47, 49, 50, 58, 61, 70, 71, 74, 75, 78]	[30, 45, 37, 39, 52, 29, 35, 42, 51, 59, 62, 33, 48, 56, 57, 44, 60, 63, 69]	0.0762712	0.0655738	0.0106974	0.284007	5.11929e-05	0		0.174012	0.0410566	0	0	0	0	0	0	0	1	1	3	0	0	0	0	0	0	0	0	0	0	0	0	0	1	0	0	0	0	0
RALGAPA2	ENSG00000188559.15	chr20	-	20389559	20389810	ALJ	TRUE	0.0111737	5.40847e-05	[4, 16, 20, 42, 21, 0, 65, 58, 19, 27, 53, 61, 11, 57, 64, 67, 3, 6, 18, 59, 74, 88, 7, 30, 46, 62, 70, 71, 78, 104, 1, 5, 12, 13, 14, 15, 17, 22, 23, 24, 25, 26, 28, 29, 31, 32, 33, 34, 35, 36, 37, 38, 39, 40, 41, 44, 45, 47, 48, 49, 50, 51, 52, 54, 55, 56, 60, 63, 66, 68, 69, 72, 75, 76, 77, 79, 80, 81, 82, 83, 84, 85, 86, 87, 89, 92, 93, 94, 97, 98, 101, 102, 105, 106, 107, 108, 109, 110, 111,…	[95, 113, 90, 96, 2, 99, 100, 103, 8, 9, 10, 43, 73, 115, 91]	0.623077	0.5	0.123077	0.161747	0.0155687	0		0.0830617	0.0158705	0	1	1	10	0	6	0	2	0	0	0	5	0	5	0	0	0	0	1	9	0	8	0	16	0	0	2	4	1
ZNF41	ENSG00000147124.12	chrX	-	47456414	47467409	3AS	TRUE	0.0114381	5.55055e-05	[7, 18, 20, 9, 55, 36, 37, 16, 53, 40, 26, 52, 85, 106, 114, 28, 33, 35, 57, 58, 62, 67, 100, 117, 119, 122]	[25, 1, 84, 72, 77, 46, 110, 48]	1	1	0	0.0545941	0.000718043	0.312381	0.0573685	0.171587	0.0351067	0	20	4	48	0	21	1	25	0	10	1	9	3	33	0	4	0	1	0	2	0	1	0	0	0	0	0	1	0
PRPF38B	ENSG00000134186.12	chr1	+	108692867	108693571	3AS	TRUE	0.0116686	5.67682e-05	[33, 171, 95, 165, 299, 66, 90, 302, 318, 393, 269, 335, 314, 329, 300, 305, 401, 293, 295, 298, 307, 274, 409, 311, 325, 199, 334, 81, 337, 345, 359]	[226, 218, 42, 301, 57, 71, 121, 257, 137, 142, 273, 275, 280, 284, 296, 170, 174, 198, 332, 216, 369, 117, 380]	1	0.944444	0.0555556	0.113298	0.0159653	0.608798	0.00264996	0.272319	0.066272	0	1	2	26	0	26	3	42	0	2	0	0	0	10	0	0	0	2	1	4	0	0	0	4	0	0	0	3	0
ZC3H11A	ENSG00000058673.17	chr1	+	203795794	203802956	ES	TRUE	0.0119396	5.82632e-05	[127, 144, 786, 804, 778, 784, 728, 186, 796]	[30, 5, 63, 9, 26, 65, 178, 193, 80, 317, 36, 400, 218, 107, 560, 325, 3, 27, 463, 364, 368, 128, 15, 406, 793, 156, 798, 196, 598, 354, 759, 760, 765, 509, 388, 647, 775, 785, 788, 407, 280, 411, 544, 799, 39, 297, 427, 305, 306, 188, 444, 64, 67, 68, 204, 206, 334, 217, 477, 96, 608, 480, 376, 486, 234, 371, 757, 502, 761, 762, 821, 824]	0.00909091	0.429577	0.420487	0.808212	0.00616615	0.944948	0.000659528	0.875807	0.00877771	5	9	43	48	35	40	4	8	10	10	39	47	17	25	4	4	8	8	0	0	4	5	14	18	0	0	0	0	1
CPSF3	ENSG00000119203.14	chr2	+	9441601	9441817	IR	TRUE	0.0119396	5.83814e-05	[53, 59, 183, 250, 261, 157, 262, 257, 132, 263, 265, 266, 267, 268, 271, 145, 148, 276, 278, 279, 170, 196, 69, 200, 232, 244, 246, 248]	[0, 27, 41, 55, 58, 28, 61, 71, 66, 36, 52, 33, 54, 140, 57, 80, 68, 81, 147, 17, 62, 141, 165, 9, 51, 74, 88, 129, 166, 5, 48, 50, 83, 87, 108, 120, 128, 130, 142, 144, 168, 178, 179, 198, 217, 264, 12, 26, 40, 42, 44, 70, 73, 84, 89, 94, 95, 96, 109, 111, 112, 113, 116, 117, 119, 123, 126, 131, 136, 137, 143, 146, 149, 150, 152, 153, 154, 156, 158, 159, 167, 171, 172, 173, 177, 180, 181, 182, 1…	1	0.99078	0.00921986	0.820305	0.0635226	0.963093	6.30213e-05	0.879747	0.0288517	54	54	71	76	86	88	34	34	93	107	324	359	58	58	1	1	6	6	0	0	1	3	3	7	0	0	0	0	6
COPS2	ENSG00000166200.15	chr15	-	49128773	49129476	IR	TRUE	0.0121284	5.94546e-05	[13, 11, 47, 24, 188, 128, 187, 214, 157, 158, 194, 168, 186, 190, 195, 203, 204, 83, 224, 228, 230, 234, 237, 240, 242, 243, 127]	[37, 68, 40, 55, 60, 78, 88, 146, 147, 69, 84, 91, 229, 115, 124, 135, 145, 159, 169, 53, 57, 76, 79, 90, 219, 227, 117, 118]	0.0941828	0.679012	0.58483	0.201488	0.0543042	0.740338	0.0345508	0.386504	0.120514	5	36	1	1	16	17	9	14	6	36	0	2	5	6	1	4	0	2	1	43	0	6	0	29	0	5	0	3	3
VPS8	ENSG00000156931.16	chr3	+	184849195	184849917	IR	TRUE	0.0121601	5.976e-05	[57, 390, 348, 39, 69, 90, 218, 350, 397, 400, 409, 411, 31, 418, 41, 303, 306, 52, 313, 315, 316, 325, 71, 89, 92, 94, 97, 354, 356, 103, 363, 364, 109, 115, 116, 119, 121]	[13, 178, 153, 20, 24, 156, 228, 128, 165, 298, 357, 168, 174, 175, 319, 208, 336, 230, 231, 257, 258, 387, 261, 136, 264, 266, 267, 12, 270, 144, 272, 146, 149, 22, 151, 278, 279, 282, 285, 159, 160, 286, 288, 410, 164, 166, 292, 169, 294, 296, 297, 45, 300, 326, 76, 211, 213, 214, 343, 108, 236, 371, 372, 245, 246, 374, 248, 252, 253, 255]	1	1	0	0.280034	0.0760639	0.87097	0.0457112	0.574472	0.150289	0	2	6	10	5	5	9	19	0	2	0	0	5	6	0	0	0	1	0	0	0	1	0	0	0	0	0	0	0
NFYA	ENSG00000001167.14	chr6	+	41075386	41079028	3AS	TRUE	0.0123671	6.09299e-05	[15, 12, 19, 165, 67, 278, 75, 0, 262, 25, 33, 39, 180, 309, 311, 60, 190, 80, 90, 99, 254, 324]	[64, 51, 45, 288, 128, 135, 104, 299, 141, 143, 56, 95]	0.125984	0.117647	0.00833719	0.324536	0.0370691	0		0.161932	0.0511519	0	0	0	3	0	0	0	2	0	0	0	1	0	3	0	1	0	0	3	4	0	0	0	2	0	0	0	2	1
ADTRP	ENSG00000111863.13	chr6	-	11712234	11713815	ES	TRUE	0.0123928	6.12097e-05	[51, 52, 122, 137, 153]	[55, 64, 57, 131, 100, 17, 132, 144, 56, 166, 14, 63, 99, 134, 135, 8, 140, 19, 151, 152, 29, 34, 39, 40, 43, 178, 187, 74, 108, 110, 115]	1	1	0	0.885248	0.00621978	0.628071	4.92981e-05	0.757647	0.0221266	27	27	30	41	34	36	28	33	65	71	4	5	5	8	11	12	0	0	0	0	0	0	0	0	0	0	0	0	1
CXXC1	ENSG00000154832.15	chr18	-	50285247	50285748	ES	FALSE	0.0124251	6.15224e-05	[15, 101, 60, 67, 79, 103, 31, 77, 92, 97, 118, 135, 153, 154, 157, 38, 165, 44, 170, 177, 109, 116, 132, 134, 142, 144, 27, 155, 156, 159, 33, 160, 35, 162, 37, 163, 164, 166, 167, 178, 181, 96, 99, 100, 105, 106, 107, 113, 115]	[1, 10, 3, 18, 2, 25, 32, 41, 82, 22, 26, 74, 117, 13, 172, 48, 50, 51, 68, 125, 131, 7, 136, 137, 143, 16, 20, 40, 179, 53, 54, 57, 58, 72, 80, 104, 129, 5, 11, 139, 140, 145, 19, 147, 148, 150, 29, 161, 39, 174, 176, 55, 180, 75, 81, 83, 84, 87, 90, 91, 102, 108, 110, 111, 182, 183, 185, 187, 188, 189]	0.427778	0.222	0.205778	0.601286	0.0170379	0.875641	0.00940127	0.755798	0.0321798	0	0	7	10	2	6	20	37	0	0	0	0	24	40	1	2	0	0	18	47	0	0	8	24	0	0	7	19	0
ARRDC3	ENSG00000113369.9	chr5	-	91375178	91375276	IR	TRUE	0.0128246	6.3659e-05	[98, 114, 80, 128, 113, 180, 117, 64, 112, 291, 304, 331, 247, 122, 276, 278, 284, 289, 290, 292, 293, 303, 309, 184, 185, 57, 319, 333]	[38, 12, 55, 33, 44, 13, 11, 50, 59, 49, 58, 47, 77, 62, 53, 107, 194, 100, 111, 189, 126, 21, 157, 167, 52, 182, 191, 193, 73, 205, 90, 95, 97, 108, 123, 262, 136, 151, 295, 296, 174, 179, 181, 314, 61, 190, 316, 317, 318, 199, 75, 211, 225, 115]	0.97006	1	0.0299401	0.814434	0.0438042	0.972196	1.93572e-05	0.866792	0.0235893	36	39	190	198	521	523	46	54	71	71	201	218	51	53	28	29	3	4	0	0	6	6	0	0	0	0	0	0	3
HYI	ENSG00000178922.17	chr1	-	43452013	43452204	3AS	TRUE	0.0128657	6.4022e-05	[3, 4, 2, 11, 0, 9, 22, 1, 20, 21, 28, 29, 30, 34, 35]	[7, 5, 13, 16, 14, 32, 33, 8, 15, 18, 24, 25, 31]	0.90625	1	0.09375	0.53704	0.000127343	0.0852711	0.00850884	0.292554	0.070551	0	0	4	8	0	1	3	5	0	0	0	0	0	4	2	2	0	0	1	1	0	0	0	1	0	0	1	1	2
NAIP	ENSG00000278613.4	GL339449.2	+	434661	436539	3AS	TRUE	0.0129154	6.44286e-05	[17, 14, 40, 72, 73, 75, 15, 78, 18, 84, 21, 92]	[1, 9, 23, 5, 26, 29, 34, 38, 52, 60, 64, 35, 42, 83, 10, 30, 31, 51, 53, 54, 57, 89, 2, 3, 6, 8, 11, 12, 13, 16, 19, 20, 28, 32, 33, 39, 43, 46, 47, 48, 49, 61, 62, 63, 65, 67, 68, 69, 70, 71, 74, 76, 77, 79, 80, 85, 86, 87, 88, 91]	0.2	0.283784	0.0837838	0.763014	5.79371e-05	0.968273	3.1006e-06	0.830574	0.024711	0	1	2	3	5	8	1	1	0	0	2	2	0	1	0	0	10	14	8	8	44	56	0	0	0	0	0	1	1
NOP56	ENSG00000101361.17	chr20	+	2657218	2657372	IR	FALSE	0.0130598	6.53102e-05	[5, 0, 17, 102, 25, 13, 81, 160, 515, 59, 135, 223, 241, 66, 94, 126, 965, 65, 584, 114, 627, 147, 662, 156, 164, 225, 522, 586, 598, 109, 629, 119, 131, 672, 676, 181, 718, 212, 765, 257, 831, 322, 851, 879, 936, 1024, 514, 518, 519, 1034, 1044, 1055, 1057, 548, 77, 87, 92, 614, 625, 139, 654, 143, 145, 154, 671, 169, 173, 686, 721, 214, 226, 740, 243, 244, 248, 250, 261, 264, 269, 783, 273, 788…	[45, 9, 2, 208, 21, 23, 11, 1, 50, 107, 240, 91, 30, 49, 179, 125, 18, 41, 129, 130, 51, 71, 35, 57, 97, 162, 272, 99, 284, 599, 15, 16, 89, 93, 262, 132, 596, 47, 564, 594, 10, 46, 39, 152, 60, 84, 88, 137, 175, 280, 328, 357, 583, 593, 818, 165, 196, 255, 439, 444, 595, 153, 189, 263, 275, 303, 406, 473, 495, 592, 639, 54, 70, 140, 183, 187, 190, 217, 254, 293, 372, 554, 590, 612, 833, 837, 4, …	0.626685	0.745579	0.118894	0.504119	0.0393881	0.72051	0.00169524	0.593478	0.0276073	5	14	50	63	108	148	104	161	4	13	5	18	35	52	4	7	0	0	1	7	4	11	3	9	0	0	0	1	3
ADD3	ENSG00000148700.15	chr10	+	110077118	110100624	ES	FALSE	0.0136804	6.85826e-05	[22, 102, 19, 213, 182, 21, 194, 255, 175, 215, 230, 174, 207, 229, 257, 379, 643, 382, 209, 339, 381, 508, 524, 562, 563, 134, 180, 212, 218, 283, 284, 316, 333, 412, 419, 422, 445, 449, 523, 535, 536, 533, 534, 537, 545, 566, 570, 620, 622, 139, 178, 183, 186, 189, 206, 208, 211, 253, 254, 275, 277, 278, 286, 288, 290, 318, 332, 334, 353, 357, 413, 414, 415, 418, 420, 423, 426, 427, 428, 429, 4…	[47, 181, 185, 137, 20, 136, 132, 112, 142, 214, 336, 140, 217, 187, 282, 314, 195, 351, 135, 190, 210, 352, 446, 506, 561, 131, 176, 177, 184, 320, 337, 338, 355, 384, 416, 448, 451, 487, 507, 522, 543, 544, 564, 565, 569, 621, 623, 130, 133, 138, 179, 188, 191, 192, 193, 216, 219, 256, 276, 279, 281, 287, 289, 291, 292, 315, 317, 319, 340, 350, 354, 380, 383, 417, 421, 424, 425, 447, 479, 480, …	0.142244	0.157449	0.0152045	0.363893	6.67571e-06	0.467652	0.002244	0.422791	0.00406549	189	498	106	286	169	436	74	243	67	199	53	154	29	76	22	55	3	7	0	0	10	23	0	0	0	0	0	0	2
ENOPH1	ENSG00000145293.16	chr4	+	82454854	82456891	IR	TRUE	0.0138001	6.93532e-05	[15, 75, 10, 99, 76, 95]	[6, 13, 7, 9, 32, 33, 41, 58, 68, 26, 38, 39, 40, 45, 49, 51, 64, 67, 69, 73, 98]	0.96875	1	0.03125	0.668852	0.0711394	0.882408	0.103743	0.771386	0.0894398	6	8	25	26	18	19	17	18	3	9	2	2	13	14	0	1	1	1	0	1	1	1	1	3	0	0	0	0	0
DDX46	ENSG00000145833.16	chr5	+	134785141	134785464	IR	TRUE	0.0138875	6.99637e-05	[163, 167, 297, 283, 337, 477, 356, 583, 368, 496, 403, 660, 541, 401, 533, 665, 678, 812, 442, 719, 850, 869, 878, 760, 251, 896, 900, 268, 399, 912, 530, 659, 535, 662, 537, 917, 416, 675, 550, 807, 808, 560, 182, 694, 443, 451, 579, 199, 455, 596, 598, 218, 475, 480, 353, 610, 483, 228, 612, 873, 370, 886]	[40, 22, 94, 61, 184, 168, 185, 308, 25, 567, 70, 173, 314, 342, 354, 137, 166, 234, 245, 249, 254, 786, 367, 378, 394, 668, 669, 266, 333, 359, 366, 440, 521, 546, 573, 574, 620, 631, 637, 661, 225, 244, 256, 260, 780, 781, 329, 339, 346, 360, 362, 380, 386, 392, 509, 8, 23, 540, 543, 548, 549, 556, 565, 569, 570, 576, 593, 594, 597, 601, 616, 622, 682, 685, 686, 688, 181, 693, 700, 710, 717, 21…	1	1	0	0.690065	0.057809	0.828788	8.84686e-06	0.790761	0.00820672	45	51	68	91	47	56	28	42	17	24	45	55	37	44	6	6	6	7	4	4	0	0	0	4	0	0	0	0	0
LSG1	ENSG00000041802.11	chr3	-	194648795	194650880	5AS	TRUE	0.0139704	7.05542e-05	[12, 115, 135, 302, 397, 284, 288, 167, 105, 334, 342, 375, 220]	[42, 76, 319, 266, 346]	0.0723684	1	0.927632	0.247722	0.0325289	0.00609854	4.53704e-07	0.128231	0.0378442	0	7	6	12	5	26	5	30	3	8	1	8	13	46	0	1	0	1	0	16	0	0	0	1	0	0	0	0	0
METTL5	ENSG00000138382.15	chr2	-	169812506	169815476	3AS	FALSE	0.0140003	7.08779e-05	[1, 4, 2, 21, 22, 30, 23, 35, 0, 7, 14, 16, 19, 20, 24, 25, 26, 34, 36, 39, 51, 52]	[43, 6, 46]	0.0782123	0	0.0782123	0.217583	3.37643e-05	0		0.088107	0.0108517	0	0	0	2	0	5	0	0	0	2	0	3	0	0	0	3	0	0	0	0	0	0	0	2	13	54	0	0	1
GPX1	ENSG00000233276.7	chr3	-	49357766	49358026	IR	FALSE	0.0142105	7.21177e-05	[3]	[1]	1	0	1	0.664075	0.0438293	1		0.789883	0.0563524	0	1	2	2	3	3	0	0	2	2	0	0	16	16	3	3	2	2	2	4	13	20	9	12	1	1	13	34	15
SMAP2	ENSG00000084070.12	chr1	+	40344815	40344910	AFJ	FALSE	0.0142607	7.25484e-05	[12, 1, 14, 23, 43, 38, 27, 35, 3, 85, 25, 34, 103, 22, 84, 37, 107, 11, 83, 26, 139, 47, 146, 29, 31, 41, 87, 99, 121, 284, 302, 114, 135, 20, 46, 100, 105, 106, 154, 6, 78, 79, 82, 96, 119, 266, 9, 17, 101, 112, 128, 170, 265, 274, 2, 16, 19, 30, 86, 95, 109, 111, 113, 116, 125, 142, 156, 162, 180, 191, 207, 217, 278, 279, 289, 8, 15, 18, 44, 75, 89, 90, 92, 94, 98, 117, 133, 141, 144, 147, 148…	[39, 50, 56, 52, 60, 28, 49, 65, 258, 48, 61, 261, 262, 268, 51, 93, 257, 260, 269, 40, 53, 54, 285, 66, 70, 72, 196, 129, 259, 263, 316, 145, 277, 282, 158, 159, 286, 287, 165, 166, 167, 168, 169, 314, 317, 55, 57, 58, 59, 62, 63, 64, 67, 68, 69, 71, 73, 193, 194, 195, 197, 222, 118, 315]	0.721154	0.361624	0.35953	0.0343035	0.00563992	0.189342	0.0194329	0.108162	0.01918	0	12	0	37	0	63	1	62	1	19	0	4	3	92	0	16	0	0	0	8	17	46	0	12	0	0	0	15	0
ZNF548	ENSG00000188785.12	chr19	+	57397174	57398412	IR	TRUE	0.0143198	7.30261e-05	[2, 15, 5, 7, 21, 4, 6, 77, 16, 80, 51, 22]	[3, 36, 44]	0.0736842	0.0353982	0.038286	0.21983	0.0719517	0.794518	0.0697207	0.4474	0.152632	0	26	9	10	15	22	10	16	0	23	1	1	2	2	0	1	0	0	4	13	2	9	2	16	0	0	0	2	0
SYNE1	ENSG00000131018.24	chr6	-	152143765	152148044	ES	FALSE	0.0144863	7.40539e-05	[6, 3, 46, 34, 276, 47, 199, 8, 12, 15, 146, 0, 5, 33, 43, 68, 84, 99, 108, 16, 18, 147, 280, 155, 303, 179, 308, 78, 212, 87, 88, 89, 103, 104, 107, 115, 254, 330, 335, 340, 343, 346]	[11, 2, 31, 41, 44, 48, 67, 35, 49, 178, 86, 119, 4, 17, 148, 30, 50, 180, 181, 182, 304, 305, 307, 309, 310, 66, 77, 221, 105, 106, 109, 116, 334, 337, 338, 339, 341, 342, 347]	0.923077	0.961905	0.0388278	0.186288	0.038336	0.45589	0.0011137	0.343072	0.0391474	0	0	1	5	0	8	0	24	0	1	0	0	3	10	0	0	0	0	0	4	1	2	1	2	0	0	0	0	0
TAF2	ENSG00000064313.12	chr8	-	119794944	119795531	IR	TRUE	0.0145594	7.46074e-05	[34, 81, 554, 557, 531, 586, 734, 762, 525, 72, 602, 740, 774, 83, 84, 90, 93, 111, 640, 661, 191, 202, 715, 744, 795, 806, 517, 518, 521, 523, 528, 534, 539, 542, 578, 579, 68, 581, 71, 74, 76, 78, 591, 87, 91, 95, 96, 609, 612, 101, 613, 615, 616, 105, 618, 107, 108, 109, 110, 621, 627, 628, 143, 660, 163, 164, 167, 172, 176, 178, 180, 181, 189, 192, 193, 711, 200, 204, 716, 717, 718, 719, 723,…	[31, 420, 603, 480, 294, 168, 466, 227, 522, 658, 659, 537, 541, 30, 287, 421, 175, 452, 590, 228, 504, 623, 112, 500, 376, 505]	1	1	0	0.0969103	0.0143727	0.700539	0.120056	0.274933	0.112115	0	2	4	20	0	12	4	19	1	12	0	4	4	6	0	3	0	0	0	0	0	1	0	24	0	0	0	2	0
TPP2	ENSG00000134900.12	chr13	+	102644673	102646279	3AS	TRUE	0.0146387	7.51945e-05	[69, 216, 581, 104, 113, 479, 225, 585, 588, 270, 79, 240]	[15, 23, 30, 56, 40, 51, 123, 165, 21, 73, 87, 164, 45, 329, 339, 46, 60, 114, 173, 371, 455, 43, 61, 68, 91, 107, 121, 137, 138, 159, 197, 226, 238, 243, 336, 340, 354, 358, 367, 386, 402, 428, 493, 517, 6, 11, 17, 29, 31, 38, 44, 564, 66, 72, 74, 77, 86, 599, 605, 96, 109, 117, 120, 130, 131, 134, 141, 150, 152, 156, 160, 162, 169, 174, 178, 185, 186, 191, 192, 203, 208, 211, 212, 215, 219, 223…	0.181818	1	0.818182	0.709313	0.072154	1		0.853801	0.0694078	0	0	15	19	10	10	6	7	1	1	0	0	6	6	2	2	0	0	0	0	0	0	0	5	0	0	0	0	2
DCAF16	ENSG00000163257.11	chr4	-	17793449	17795052	ALJ	TRUE	0.0149455	7.69853e-05	[19, 1, 20, 14, 0, 13, 22, 11, 131, 3, 15, 35, 41, 51, 55, 166, 65, 151, 160, 37, 39, 79, 152, 154, 16, 26, 50, 54, 57, 70, 75, 144, 145, 146, 161, 2, 18, 24, 38, 42, 52, 61, 77, 82, 84, 88, 97, 100, 102, 105, 107, 123, 130, 135, 139, 141, 143, 149, 163, 169, 171, 4, 5, 6, 7, 8, 9, 10, 12, 17, 23, 25, 27, 28, 34, 36, 40, 43, 44, 45, 46, 47, 48, 49, 53, 56, 58, 59, 60, 62, 63, 64, 66, 67, 68, 69, …	[21, 33, 117, 29, 30, 31, 179, 182, 32, 137, 178, 148, 180, 183, 186]	0.798174	1	0.201826	0.256263	0.044194	0.044881	0.00759348	0.156506	0.0386006	8	9	2	19	4	21	12	57	13	22	5	12	0	23	5	6	4	11	3	73	2	5	1	20	0	1	0	7	1
HELLS	ENSG00000119969.15	chr10	+	94545907	94546376	IR	TRUE	0.0149455	7.71393e-05	[2, 6, 131, 33, 73, 7, 137, 18, 62, 103, 117, 8, 32, 168, 52, 72, 92, 118, 129, 132, 136, 139, 13, 14, 19, 146, 153, 36, 45, 46, 50, 53, 181, 182, 56, 187, 64, 65, 74, 91, 93, 95, 96, 98, 107, 125, 190, 192, 194, 195, 196, 198]	[12, 100, 70, 143, 99, 170, 76, 142, 144, 17, 80, 116, 151, 183, 155, 124, 31]	0.0891365	0.983051	0.893914	0.204319	0.00471768	0.0305956	8.76709e-06	0.134465	0.0084947	0	8	1	3	0	8	0	1	1	6	3	8	0	2	1	1	3	9	3	6	0	0	1	5	1	4	0	0	0
NRDC	ENSG00000078618.22	chr1	-	51789657	51790899	IR	TRUE	0.0150441	7.78339e-05	[82, 485, 514, 494, 483, 542, 503, 519, 551, 564, 605, 544, 543, 686, 901, 546, 918, 532, 861, 520, 655, 881, 525, 548, 558, 1153, 1155, 1168, 569, 575, 1164, 685, 688, 702, 743, 782, 785, 800, 835, 903, 522, 1061, 571, 573, 1094, 1129, 1134, 1136, 1152, 1197, 1221, 726, 1248, 1254, 745, 1258, 780, 789, 792, 804, 316, 874, 889, 908, 909, 913, 920, 927, 942, 487, 500, 1027, 524, 1040, 1043, 1050, …	[291, 886, 294, 683, 577, 649, 541, 285, 809, 939, 944, 727, 863, 914, 790, 799, 422, 680, 299, 428, 817, 947, 959, 704, 451, 580, 964, 720, 849, 594, 599, 619, 621, 1005, 1008, 765, 1274]	0.378817	0.943662	0.564845	0.174256	0.0755749	0.0510178	9.26706e-06	0.080992	0.00799435	0	2	4	37	5	78	6	57	2	13	0	6	10	63	0	2	0	0	0	8	1	33	0	25	0	0	0	1	0
CLCC1	ENSG00000121940.16	chr1	-	108950438	108963360	3AS	FALSE	0.0150889	7.82524e-05	[7, 24, 157, 42, 73, 202, 134, 90, 265, 190, 80, 305, 186, 314, 65, 346, 118, 388, 161, 167, 169, 434, 66, 77, 207, 342, 364, 373, 119, 441, 443]	[4, 3, 68, 53, 41, 81, 40, 34, 9, 33, 35, 39, 25, 48, 45, 57, 89, 22, 121, 102, 92, 63, 69, 75, 128, 325, 335, 60, 116, 179, 199, 201, 318, 406, 51, 100, 230, 269, 313, 391, 407, 19, 79, 99, 117, 131, 149, 172, 212, 215, 216, 222, 225, 229, 244, 254, 297, 310, 326, 329, 330, 351, 361, 414, 417, 433, 1, 2, 15, 38, 44, 46, 49, 64, 71, 86, 91, 94, 106, 108, 109, 110, 123, 124, 126, 141, 144, 146, 14…	0.0964912	0.0936725	0.00281877	0.834833	0.0013343	0.920957	0.000314047	0.874581	0.00263205	34	43	54	63	86	95	45	48	31	38	48	51	31	40	16	20	10	12	13	17	9	10	3	3	0	0	3	4	7
STK26	ENSG00000134602.16	chrX	+	132054861	132068214	3AS	TRUE	0.0151528	7.87709e-05	[21, 121, 195, 66, 98, 199, 130, 375, 509, 266, 416, 369, 523, 525, 399, 406, 420, 188, 455, 467, 482, 485, 232, 492, 250, 380, 510]	[6, 95, 161, 151, 212, 40, 168, 76, 181, 145, 207, 305, 426, 279, 291, 110, 183, 218, 219, 300, 210, 216, 220, 262, 272, 283, 290, 370, 27, 154, 187, 190, 297, 310, 313, 324, 344, 367, 407, 481, 487, 505, 507, 518, 14, 527, 16, 28, 29, 38, 71, 100, 119, 153, 178, 182, 193, 204, 214, 222, 236, 238, 239, 244, 261, 269, 280, 284, 306, 307, 312, 314, 318, 319, 320, 322, 323, 337, 340, 357, 371, 409, …	0.0824916	0.998081	0.915589	0.507876	0.053125	0.778636	0.0103158	0.627337	0.0465416	18	32	60	76	41	71	19	38	9	28	33	37	20	36	6	8	4	5	0	37	9	14	26	136	0	0	3	5	12
STAP1	ENSG00000035720.8	chr4	+	67606295	67607335	ALJ	TRUE	0.0155583	8.12018e-05	[4, 14, 21, 62, 7, 10, 31, 12, 63, 78, 85, 105, 22, 44, 106, 46, 101, 144, 29, 81, 200, 13, 15, 61, 133, 143, 197, 208, 25, 102, 109, 112, 118, 119, 154, 158, 161, 183, 189, 193, 255, 260, 261, 268, 30, 32, 42, 49, 52, 67, 70, 82, 94, 103, 111, 113, 114, 116, 127, 128, 132, 138, 142, 145, 146, 157, 159, 162, 178, 180, 182, 190, 191, 192, 198, 204, 207, 210, 211, 212, 214, 216, 219, 221, 225, 227,…	[0, 6, 1, 11, 34, 2, 35, 5, 3, 16, 83, 47, 9, 33, 76, 50, 48, 28, 121, 24, 84, 69, 75, 181, 99, 139, 39, 45, 126, 40, 43, 58, 91, 153, 170, 201, 41, 93, 96, 100, 135, 57, 60, 115, 129, 152, 195, 218, 229, 19, 20, 27, 37, 55, 56, 64, 65, 68, 72, 73, 77, 87, 89, 98, 108, 124, 125, 134, 140, 150, 160, 165, 174, 186, 188, 194, 196, 202, 209, 215, 220, 228, 245, 247, 8, 17, 18, 23, 26, 36, 38, 51, 53,…	0.619632	0.493274	0.126358	0.779665	0.0273201	0.916492	0.000898139	0.862112	0.00915113	139	147	199	235	129	149	252	287	288	319	301	326	291	315	144	148	1	2	1	5	4	5	4	6	1	3	2	3	2
VPS8	ENSG00000156931.16	chr3	+	184849195	184849935	3AS	TRUE	0.0155583	8.1263e-05	[1, 6, 49, 147, 16, 19, 27, 53, 254, 185, 152, 5, 11, 334, 18, 34, 2, 40, 112, 150, 172, 173, 187, 189, 217, 25, 50, 59, 129, 130, 134, 220, 227, 242, 271, 338, 340, 353, 358, 4, 7, 8, 55, 63, 66, 74, 78, 81, 91, 93, 96, 113, 133, 154, 155, 161, 181, 186, 190, 191, 194, 201, 207, 226, 232, 263, 275, 276, 277, 305, 310, 317, 330, 333, 335, 344, 347, 351, 373, 408, 3, 10, 17, 21, 23, 26, 28, 30, 33…	[57, 390, 348, 39, 69, 90, 111, 291, 171, 218, 350, 397, 400, 409, 411, 31, 418, 41, 303, 306, 52, 313, 315, 316, 325, 71, 216, 89, 92, 94, 345, 97, 354, 356, 103, 362, 363, 364, 109, 110, 115, 116, 119, 121]	0.288368	1	0.711632	0.152424	0.00966798	0.0346075	0.004988	0.0979979	0.0153868	2	16	4	80	1	82	10	67	3	8	1	12	1	30	0	0	1	1	0	0	1	6	0	1	0	0	0	0	0
INTS7	ENSG00000143493.13	chr1	-	211940855	211942111	ALJ	TRUE	0.0157049	8.22227e-05	[27, 30, 34, 233, 35, 33, 225, 25, 77, 127, 180, 49, 128, 297, 314, 29, 40, 182, 306, 316, 388, 31, 65, 73, 125, 126, 151, 183, 395, 398, 75, 78, 80, 108, 137, 138, 154, 195, 201, 224, 234, 235, 243, 270, 304, 363, 375, 387, 413, 426, 28, 32, 41, 42, 44, 47, 54, 72, 74, 76, 79, 81, 101, 109, 148, 150, 152, 153, 155, 157, 166, 169, 174, 176, 181, 194, 202, 203, 212, 215, 216, 223, 244, 249, 257, 2…	[0, 48, 1, 21, 19, 5, 110, 3, 6, 9, 56, 115, 55, 192, 69, 53, 43, 15, 17, 46, 185, 228, 2, 11, 96, 121, 20, 22, 23, 89, 117, 83, 97, 107, 118, 133, 191, 210, 213, 284, 288, 298, 88, 102, 214, 226, 256, 262, 279, 332, 335, 10, 45, 59, 70, 103, 120, 140, 163, 179, 188, 196, 197, 200, 218, 227, 263, 292, 299, 310, 334, 342, 354, 390, 429, 8, 24, 39, 62, 66, 67, 95, 98, 116, 123, 129, 131, 145, 147, …	0.159468	0.149105	0.0103631	0.813468	0.0120445	0.877499	2.54595e-06	0.847526	0.00464162	55	63	101	110	131	152	58	81	71	78	149	153	49	58	26	27	32	38	16	30	4	8	23	40	0	1	3	5	23
TFRC	ENSG00000072274.13	chr3	-	196072168	196073929	3AS	TRUE	0.0157618	8.2715e-05	[138, 125, 785, 172, 166, 877, 774, 953, 211, 884, 804, 1079, 595, 1035, 1432, 924, 802, 163, 1196, 580, 964, 584, 1245, 226, 614, 1154, 1030, 1158, 649, 1290, 1549, 1425, 1436, 1182, 1318, 302, 1200, 1462, 1336, 1591, 187, 961, 1218, 1219, 325, 583, 1356, 1359, 976, 346, 1500, 991, 1249, 998, 879, 370, 882, 1138, 1268, 1274, 1276]	[245, 1444, 627, 1374, 946, 630, 313, 794]	1	1	0	0.142305	0.0174911	1		0.243755	0.064329	0	4	0	4	4	7	1	2	0	5	0	1	0	0	0	0	2	23	1	23	0	2	3	17	0	0	0	1	0
HELQ	ENSG00000163312.11	chr4	-	83437097	83439862	3AS	TRUE	0.0162023	8.52267e-05	[0, 33, 1, 16, 25, 28, 36, 75, 27, 124, 30, 79, 134, 6, 7, 43, 56, 103, 15, 57, 156, 282, 78, 116, 98, 26, 76, 154, 160, 180, 201, 248, 284, 460, 122, 142, 165, 217, 226, 346, 568, 66, 81, 93, 100, 112, 149, 153, 194, 204, 255, 281, 327, 484, 38, 40, 71, 73, 74, 80, 85, 91, 121, 130, 133, 148, 152, 155, 157, 164, 174, 191, 197, 230, 232, 234, 247, 252, 254, 256, 268, 287, 359, 365, 377, 384, 417,…	[306, 61, 431, 418, 516, 200, 475, 488, 505, 107, 187, 325, 448, 489, 504, 513, 523, 13, 551, 358, 415, 425, 486, 494, 499, 512, 519, 521, 522, 525, 533, 535, 548, 560, 49, 561, 571, 580, 583, 593, 595, 604, 108, 622, 623, 629, 632, 637, 163, 233, 310, 363, 367, 392, 402, 414, 416, 419, 421, 433, 439, 443, 445, 453, 455, 458, 462, 472, 490, 493, 496, 497, 498, 506, 509, 510, 511, 676]	0.669272	1	0.330728	0.126107	0.0113801	0.0210778	0.000121435	0.0702358	0.00687238	8	50	14	95	10	104	63	131	8	52	7	81	4	55	0	5	4	11	0	4	0	2	1	4	0	0	0	0	1
CR2	ENSG00000117322.18	chr1	+	207466912	207468547	IR	TRUE	0.0164145	8.65952e-05	[79, 230, 301, 242, 314, 322, 64, 229, 299, 319, 330, 272]	[88, 53, 69, 122, 290, 15, 295, 96, 137, 140, 165, 172, 304, 60, 320, 80, 259, 269, 152, 41, 309, 185, 313, 199, 206, 207, 89, 221, 222, 109, 237, 112, 240, 114, 243, 118, 248, 249, 251, 124, 125, 388, 396, 405, 420, 365, 366, 367]	0.132075	1	0.867925	0.197872	0.0623491	0.907066	9.69757e-05	0.547134	0.134417	0	25	15	29	7	10	9	55	0	9	0	0	0	2	0	0	0	0	0	0	0	0	0	0	0	0	0	0	0
TOR1AIP2	ENSG00000169905.13	chr1	-	179862443	179865869	ALJ	TRUE	0.0164145	8.67485e-05	[8, 2, 9, 5, 0, 3, 44, 75, 15, 18, 4, 20, 39, 17, 32, 65, 71, 12, 19, 74, 109, 1, 23, 46, 70, 95, 110, 6, 34, 48, 67, 83, 85, 88, 90, 91, 94, 103, 111, 115, 129, 7, 10, 16, 21, 24, 25, 27, 28, 30, 31, 33, 35, 36, 38, 40, 41, 42, 43, 45, 49, 50, 51, 52, 53, 54, 55, 56, 57, 58, 59, 60, 61, 62, 63, 64, 66, 69, 72, 77, 78, 79, 80, 81, 82, 84, 86, 87, 89, 93, 96, 97, 98, 99, 101, 102, 104, 105, 113, 1…	[26, 29]	0.507345	1	0.492655	0.0943643	0.00876826	0		0.0423004	0.00806117	0	5	0	26	0	18	0	6	0	7	0	6	0	6	0	5	0	2	1	7	0	5	3	27	0	0	0	14	2
ZNF559-ZNF177	ENSG00000270011.7	chr19	+	9341184	9343589	3AS	TRUE	0.0164719	8.72551e-05	[179, 160, 228, 186, 201, 204, 219, 18, 178, 212, 242, 23, 25, 122, 187]	[28, 4, 67, 83, 14, 36, 193, 70, 102, 109, 29, 156, 168, 51, 52, 183, 188, 190, 107, 116, 0, 2, 5, 133, 9, 138, 15, 16, 146, 20, 148, 27, 31, 32, 33, 161, 35, 37, 162, 42, 44, 45, 46, 47, 48, 49, 50, 55, 56, 59, 60, 62, 64, 65, 77, 79, 81, 82, 209, 85, 86, 88, 89, 224, 226, 99, 100, 229, 108, 237, 238, 117, 119, 123, 126, 244]	1	0.913043	0.0869565	0.687675	5.46668e-05	0.985376	0.000593107	0.858889	0.0256444	2	2	4	5	0	0	12	17	0	1	2	4	1	2	2	3	0	0	1	1	0	0	0	0	0	0	0	0	0
GGNBP2	ENSG00000278311.5	chr17	+	36586198	36587024	IR	TRUE	0.0164836	8.75204e-05	[18, 15, 25, 26, 172, 203, 275, 217, 196, 225, 146, 311, 321, 213, 226, 353, 384, 269, 302, 305, 308, 314, 194, 195, 198, 199, 327, 328, 202, 204, 205, 329, 336, 209, 214, 221, 222, 362, 363, 112, 380]	[32, 68, 35, 143, 55, 73, 116, 148, 230, 197, 96, 114, 98, 129, 265, 298, 190, 218, 257, 264, 268, 141, 271, 282, 154, 159, 160, 38, 167, 168, 45, 47, 175, 179, 181, 59, 187, 317, 191, 201, 335, 208, 223, 351, 239, 241, 242, 243, 374, 377]	0.176724	1	0.823276	0.25054	0.048454	0.756554	0.0266698	0.417105	0.101854	6	22	11	23	15	48	20	30	1	12	2	3	9	14	2	8	0	5	0	14	1	13	1	15	0	1	0	5	2
CCDC66	ENSG00000180376.17	chr3	+	56615272	56615903	IR	TRUE	0.0166638	8.86832e-05	[14, 33, 36, 38, 539, 72, 543, 70, 146, 674, 522, 35, 40, 54, 578, 77, 121, 651, 145, 156, 681, 701, 768, 276, 415, 459, 478, 496, 500, 511, 512, 519, 13, 37, 552, 44, 48, 56, 58, 62, 63, 65, 68, 582, 75, 76, 79, 83, 85, 599, 604, 605, 612, 621, 117, 123, 124, 638, 128, 129, 642, 135, 648, 138, 653, 142, 659, 661, 663, 666, 671, 673, 163, 678, 679, 682, 683, 684, 689, 694, 696, 698, 699, 703, 729…	[476, 366, 277, 289, 421, 227, 233, 241, 3, 263, 8, 393, 391, 524, 15, 531, 154, 667, 160, 305, 178, 310, 567, 442, 315, 443, 192, 452, 455, 205, 591, 81, 211, 89, 92, 222, 97, 358, 103, 624, 369, 116, 247, 250, 782, 783, 784]	0.605	1	0.395	0.108037	0.0146931	0.608965	0.115417	0.335201	0.120783	0	5	6	19	3	8	0	4	0	5	2	7	1	1	0	3	1	2	0	0	0	0	0	2	0	1	0	0	0
DDX23	ENSG00000174243.10	chr12	-	48833721	48834319	IR	TRUE	0.0173692	9.26516e-05	[199, 122, 118, 200, 253, 332, 268, 304, 195, 350, 396, 403, 292, 302, 196, 370, 372, 257, 387, 267, 275, 296, 301, 337, 210, 211, 347, 224]	[206, 77, 241, 91, 128, 260, 71, 298, 171, 300, 173, 146, 182, 57, 126]	0.990991	1	0.00900901	0.333333	0.222221	0.121073	2.85188e-05	0.261842	0.0832645	0	0	0	1	0	5	0	12	0	0	0	0	0	4	0	0	0	0	0	4	0	0	0	2	0	0	0	0	0
ZC3H11A	ENSG00000058673.17	chr1	+	203801639	203802956	3AS	TRUE	0.0174554	9.33273e-05	[63, 9, 29, 70, 560, 3, 27, 196, 505, 769, 261, 647, 785, 297, 809, 176, 305, 324, 334, 209, 221, 607, 502, 509]	[100, 102, 113, 266, 482, 97, 167, 718, 148, 287, 200, 210, 237, 651, 145, 547, 548, 695, 250, 258, 131, 265, 401, 274, 150, 536, 541, 294, 295, 298, 316, 466, 85, 89, 253, 227, 483, 744, 746, 238, 247, 249, 637]	0.524194	1	0.475806	0.678294	0.0421038	0.229398	0.000228283	0.466481	0.0780562	0	4	13	15	9	18	3	3	0	0	2	8	5	8	0	0	4	5	1	1	0	0	7	7	0	0	0	0	0
SLC7A7	ENSG00000155465.20	chr14	-	22774137	22774353	IR	TRUE	0.0176003	9.43192e-05	[331, 406, 448, 386, 424, 449, 387, 573, 362, 335, 437, 569, 572, 349]	[79, 183, 141, 19, 3, 82, 213, 122, 61, 80, 83, 85, 100, 16, 147, 255, 15, 404, 190, 323, 125, 127, 133, 278, 26, 30, 417, 420, 175, 192, 87, 114, 374, 1, 260, 264, 269, 270, 18, 402, 151, 160, 416, 40, 298, 301, 303, 177, 435, 308, 313, 315, 316, 447, 195, 198, 74, 81, 218, 220, 477, 351, 479, 354, 484, 489, 108, 494, 497, 242, 244, 507, 249, 251, 583]	1	0.923077	0.0769231	0.461506	0.140676	1		0.726481	0.150573	0	6	7	8	5	9	24	32	0	0	0	0	16	16	2	3	0	0	0	3	0	4	0	0	0	0	0	0	0
FASTKD2	ENSG00000118246.14	chr2	+	206767470	206770127	ES	TRUE	0.0178801	9.60395e-05	[47, 61, 223, 96, 36, 182, 241, 64, 325, 261, 284, 305, 322, 338, 217, 219, 220, 349, 350, 352, 228, 356, 358, 359, 240]	[80, 195, 104, 173, 262, 245]	1	1	0	0.181857	3.54276e-05	0.690759	0.0411276	0.31164	0.0389839	2	5	2	10	1	15	5	16	2	14	3	8	0	6	1	6	2	3	0	6	1	1	0	0	0	0	0	1	0
FCRL2	ENSG00000132704.16	chr1	-	157801577	157801914	3AS	TRUE	0.018035	9.70939e-05	[782, 622, 715, 343, 727, 530, 646, 1182, 1194, 706, 767, 787, 386, 1046, 558, 1628, 1128, 1646, 1658, 643, 1679, 1180, 1184, 677, 695, 714, 728, 771, 772, 780, 1296, 858, 920, 947, 955, 1547, 1086, 1095, 1621, 1125, 1141, 124, 1152, 1156, 658, 1185, 674, 1190, 1199, 688, 692, 699, 719, 731, 762, 1792, 1284, 1807, 276, 1301, 793, 1311, 1834, 1328, 1845, 1345, 330, 844, 342, 1377, 872, 879, 895, 1…	[513, 1702, 418, 952, 533, 1652, 640, 1700, 1753, 923, 456, 578, 1099, 1623, 1633, 1670, 1682, 666, 1696, 1710, 1734, 1752, 1801, 1809, 1846, 1353, 884, 902, 956, 516, 545, 1589, 1599, 1610, 1613, 1616, 1618, 1619, 1622, 1111, 1625, 1632, 1636, 1641, 1642, 1648, 633, 1659, 1668, 1669, 1677, 1689, 1701, 1202, 694, 1719, 1736, 1737, 1740, 1744, 1746, 1755, 1768, 746, 1260, 1793, 1796, 781, 1806, 78…	1	1	0	0.837141	0.000103236	0.317501	0.0237193	0.526419	0.0701535	1	1	18	21	24	30	17	18	1	1	4	5	6	9	1	1	0	0	0	0	0	0	0	0	0	0	0	0	0
DOCK10	ENSG00000135905.20	chr2	-	224805514	224806125	IR	TRUE	0.0183577	9.9285e-05	[24, 30, 23, 406, 392, 279, 488, 149, 281, 422, 479, 480, 506, 512, 513, 269, 19, 404, 21, 407, 409, 159, 31, 33, 416, 419, 36, 544, 38, 40, 424, 425, 426, 427, 430, 559, 432, 188, 327, 457, 461, 342, 477, 481, 482, 484, 485, 240]	[196, 59, 483, 454, 116, 247]	0.270968	1	0.729032	0.0220073	3.73249e-07	0.333567	8.99825e-05	0.127633	0.018211	0	16	1	24	1	37	1	23	0	8	0	0	0	3	0	0	0	1	0	0	0	0	0	0	0	0	0	0	0
CCT2	ENSG00000166226.13	chr12	+	69598421	69599841	IR	TRUE	0.0183577	9.91591e-05	[34, 599, 195, 427, 624, 83, 124, 605]	[11, 50, 10, 29, 169, 148, 245, 27, 75, 199, 85, 432, 114, 168, 536, 566, 177, 186, 256, 319, 429, 561, 563, 122, 667, 758, 264, 322, 436, 537, 73, 77, 93, 94, 99, 628, 141, 149, 155, 200, 208, 242, 246, 247, 259, 785, 307, 370, 389, 399, 412, 434, 437, 452, 454, 514, 516, 518, 520, 521, 14, 527, 533, 557, 559, 562, 53, 56, 569, 571, 574, 64, 71, 589, 80, 600, 606, 607, 101, 613, 103, 622, 111, 6…	0.0816327	0.97598	0.894347	0.738916	0.0584184	0.983972	2.7235e-05	0.846212	0.0462728	24	24	45	45	53	54	30	37	9	11	8	8	16	18	1	1	1	1	0	7	3	3	3	5	0	0	0	2	4
PEX1	ENSG00000127980.16	chr7	-	92506344	92506980	IR	TRUE	0.0184748	0.000100146	[420, 170, 449, 101, 111, 673, 688, 707, 379, 682, 556, 686, 700, 703, 331, 599, 865, 866, 744, 752, 390, 154, 825, 324, 332, 846, 849, 466, 850, 858, 603, 475, 604, 859, 863, 864, 482, 867, 868, 869, 872, 875, 623]	[7, 76, 18, 14, 48, 44, 162, 31, 302, 153, 281, 210, 286, 211, 303, 260, 125, 54, 157, 188, 230, 28, 587, 235, 268, 295, 297, 336, 57, 161, 120, 223, 280, 360, 471, 545, 726, 274, 426, 431, 613, 127, 169, 714, 717, 216, 737, 229, 249, 266, 359, 411, 439, 479, 30, 560, 64, 110, 121, 672, 678, 175, 693, 228, 254, 255, 276, 279, 289, 293, 300, 301, 314, 316, 318, 330, 339, 343, 362, 388, 397, 401, 4…	1	1	0	0.814527	0.0502232	0.965051	1.14053e-06	0.884937	0.0215302	42	42	70	74	85	103	122	128	22	23	19	19	39	42	4	4	5	5	3	3	2	2	1	4	0	0	0	0	3
CKAP2	ENSG00000136108.15	chr13	+	52455626	52456502	IR	TRUE	0.0194193	0.000105667	[16, 19, 18, 15, 114, 154, 108, 155, 193, 197, 39, 40, 200, 20, 21, 149]	[14, 112, 113, 163]	1	1	0	0.100333	0.0266528	0.857145	0.122438	0.242991	0.102285	1	6	0	3	5	6	0	7	0	5	1	2	0	0	0	1	0	6	0	9	0	2	1	4	0	3	0	0	0
CCDC88A	ENSG00000115355.17	chr2	-	55296523	55299838	ES	TRUE	0.0194193	0.000105746	[87, 89, 12, 106, 98, 145, 95, 110, 28, 162, 86, 114, 111, 58, 235, 67, 88, 93, 115, 185, 313, 438, 443, 7, 37, 561, 56, 59, 191, 207, 251, 281, 324, 350, 8, 103, 161, 193, 294, 379, 383, 401, 441, 489, 39, 42, 559, 562, 565, 567, 60, 66, 83, 108, 113, 149, 152, 186, 189, 192, 216, 283, 286, 289, 291, 292, 295, 325, 356, 360, 395, 400, 408, 415, 512, 515, 516, 517, 518, 9, 13, 530, 531, 532, 533,…	[90, 212, 440, 472, 246, 392, 394, 403, 287, 574, 194, 457, 460, 215, 469, 218, 473, 97, 237, 514, 519, 393, 399, 402, 536, 537, 409, 411, 156, 412, 414, 416, 417, 421, 167, 168, 423, 48, 563, 568, 575, 64, 446, 195, 459, 464, 465, 468, 214, 471, 474, 354, 487, 490, 112, 501, 374, 506, 382]	0.69322	1	0.30678	0.236194	0.0373765	0.0641244	2.71895e-06	0.141347	0.0163962	13	45	8	34	2	49	23	32	2	17	5	52	2	13	2	3	0	0	0	0	0	1	0	0	0	0	0	0	0
CDC27	ENSG00000004897.12	chr17	-	47122600	47123885	3AS	TRUE	0.0197183	0.000107617	[4, 1, 27, 39, 32, 25, 0, 21, 164, 183, 58, 29, 2, 23, 106, 118, 100, 345, 362, 12, 133, 420, 66, 107, 321, 182, 73, 259, 89, 236, 11, 181, 113, 117, 143, 166, 243, 240, 22, 38, 55, 114, 36, 136, 227, 381, 3, 15, 72, 101, 263, 276, 297, 315, 317, 329, 365, 407, 194, 226, 233, 264, 294, 408, 34, 70, 140, 169, 197, 298, 338, 340, 389, 398, 639, 157, 219, 222, 224, 225, 288, 295, 308, 342, 346, 375,…	[30, 82, 239, 35, 92, 134, 5, 359, 119, 145, 500, 104, 291, 576, 625, 144, 195, 823, 436, 495, 496, 518, 96, 608, 102, 108, 642, 191, 241, 850, 862, 516, 521, 526, 532, 547, 553, 45, 64, 78, 596, 626, 630, 633, 128, 142, 664, 667, 670, 677, 173, 174, 180, 184, 699, 196, 208, 209, 218, 756, 256, 770, 792, 797, 805, 808, 813, 814, 816, 820, 822, 827, 828, 327, 841, 843, 845, 848, 851, 858, 860, 356…	0.457792	1	0.542208	0.0769081	0.000878462	0.0307275	0.000183392	0.0541611	0.00113863	4	83	5	94	13	141	13	58	8	78	4	97	2	66	3	22	4	44	2	38	0	29	18	155	0	1	0	35	7
FBXO21	ENSG00000135108.15	chr12	-	117158063	117165484	3AS	FALSE	0.0204648	0.000111944	[3, 9, 10, 48, 83, 14, 84, 44, 66, 77, 69, 2, 81, 33, 82, 104, 139, 95, 157, 25, 133, 145, 165, 108, 119, 111, 324, 23, 85, 152, 243, 391, 27, 37, 126, 132, 141, 218, 13, 129, 138, 143, 172, 308, 325, 28, 47, 101, 137, 158, 161, 170, 235, 264, 301, 328, 34, 40, 168, 193, 209, 222, 226, 254, 271, 293, 330, 334, 337, 338, 344, 356, 363, 373, 376, 377, 385, 390, 400, 404, 408, 4, 8, 11, 12, 21, 42, …	[0, 39, 18, 38, 52, 78, 153, 20, 62, 59, 136, 26, 5, 43, 64, 115, 323, 187, 24, 91, 117, 142, 22, 105, 116, 217, 6, 124, 191, 206, 207, 215, 219, 266, 278, 327, 15, 29, 32, 35, 65, 123, 144, 171, 173, 180, 208, 228, 229, 298, 314, 7, 16, 17, 19, 30, 36, 45, 49, 53, 55, 57, 63, 67, 75, 98, 112, 113, 122, 164, 167, 188, 189, 195, 196, 197, 210, 211, 212, 234, 239, 247, 260, 261, 268, 273, 276, 280,…	0.151463	0.143696	0.0077672	0.423937	0.00787475	0.320257	0.00100679	0.368461	0.00609571	65	147	195	526	201	501	117	340	40	65	13	63	74	271	8	14	1	3	8	19	2	5	4	7	0	0	9	14	2
MAP3K7	ENSG00000135341.18	chr6	-	90515092	90515907	IR	TRUE	0.0205676	0.00011276	[69, 5, 12, 37, 10, 77, 25, 289, 223, 385, 263, 419, 304, 305, 264, 265, 391, 268, 270, 143, 144, 271, 273, 394, 396, 414, 415, 290, 291, 417, 420, 41, 170, 310, 393, 67, 71, 329, 330, 75, 76, 78, 331, 335, 348, 349, 226, 106, 254]	[15, 126, 97, 27, 267, 38, 13, 116, 4, 8, 224, 128, 401, 34, 292, 47, 191, 192, 195, 222, 98, 228, 354, 113, 382, 131, 266, 146, 276, 405, 26, 155, 30, 33, 36, 40, 172, 173, 46, 174, 181, 182, 439, 440, 190, 63, 65, 193, 68, 196, 74, 336, 337, 339, 215, 351, 225, 353, 102, 104, 105, 107, 364, 365, 114, 243, 117, 245, 376, 452, 454, 462, 463]	1	0.92268	0.0773196	0.412928	0.0403838	0.750906	0.0041541	0.573356	0.0512548	0	7	7	25	9	25	3	15	1	13	8	12	10	18	2	2	0	0	0	2	1	2	1	6	4	4	0	0	1
SNX17	ENSG00000115234.11	chr2	+	27371343	27372598	IR	TRUE	0.0207676	0.000114255	[36, 169, 192, 145, 152]	[6, 42, 22, 16, 5, 14, 7, 159, 104, 153, 214, 89, 132, 11, 58, 66, 207, 80, 97, 227, 121, 1, 2, 9, 10, 138, 13, 15, 24, 31, 41, 172, 47, 53, 54, 55, 82, 86, 87, 94, 226, 102, 103, 123, 244]	1	1	0	0.771833	0.00777468	0.933414	0.0621193	0.865951	0.0376598	1	1	7	8	5	6	4	7	0	0	0	1	3	5	2	3	0	0	1	3	1	2	0	0	0	0	1	1	1
RPS6KA3	ENSG00000177189.14	chrX	-	20176498	20176995	3AS	TRUE	0.0207676	0.00011437	[2, 4, 5, 49, 32, 3, 38, 25, 93, 16, 48, 61, 36, 73, 74, 12, 17, 27, 33, 43, 47, 63, 68, 75, 91, 98, 112, 6, 7, 9, 10, 11, 13, 19, 21, 22, 30, 31, 34, 37, 39, 40, 41, 42, 44, 45, 46, 51, 53, 54, 55, 56, 57, 59, 72, 78, 79, 81, 82, 84, 85, 89, 92, 97, 102, 106, 110, 111, 116, 117, 118, 119, 121, 122, 123, 124]	[29, 64, 87, 66, 100, 108, 109, 113, 18, 114, 95]	0.165957	0.0952381	0.0707194	0.150531	0.0137492	0		0.0784392	0.0126775	6	16	1	5	0	12	4	6	0	4	0	10	2	11	0	1	1	3	0	2	0	1	1	7	0	0	0	0	0
ENTPD1	ENSG00000138185.20	chr10	+	95755743	95755766	AFJ	TRUE	0.02083	0.00011497	[3, 6, 458, 55, 44, 11, 89, 12, 94, 40, 47, 1, 490, 494, 15, 72, 27, 8, 179, 57, 65, 19, 41, 475, 56, 91, 99, 498, 143, 100, 150, 474, 45, 103, 120, 127, 14, 457, 473, 83, 159, 115, 145, 469, 23, 24, 10, 62, 122, 183, 234, 251, 471, 4, 61, 116, 125, 230, 413, 499, 52, 114, 140, 141, 149, 210, 248, 277, 463, 81, 96, 124, 177, 267, 275, 355, 513, 13, 25, 46, 118, 171, 191, 209, 324, 337, 354, 370, …	[2, 30, 32, 38, 77, 70, 214, 9, 131, 134, 34, 186, 269, 419, 35, 109, 217, 344, 36, 574, 107, 135, 293, 312, 343, 345, 365, 541, 76, 162, 189, 243, 294, 317, 364, 460, 503, 516, 522, 39, 543, 550, 573, 581, 78, 594, 106, 108, 136, 216, 242, 316, 342, 348, 382, 423, 515, 7, 527, 531, 532, 533, 534, 540, 31, 33, 37, 544, 545, 546, 547, 548, 549, 551, 552, 557, 558, 559, 560, 561, 562, 563, 564, 565…	0.336151	0.845041	0.50889	0.271019	0.0300173	0.128905	0.00280288	0.203094	0.0182032	25	234	43	314	50	486	25	124	21	229	18	92	76	307	8	102	27	40	31	59	38	66	9	19	4	6	7	14	20
ANKZF1	ENSG00000163516.14	chr2	+	219230350	219232259	ES	FALSE	0.0210856	0.000116642	[79, 167, 177, 217, 127, 204, 142, 163, 173, 308, 101, 72, 215, 82, 382, 190, 195, 350, 227, 231, 256, 401, 152, 160, 171, 444, 218, 348, 237, 381, 387, 132, 388, 390, 135, 263, 271, 402, 283, 418, 292, 429, 433, 437, 439, 441, 447, 449, 324, 200, 203, 460, 462, 338, 466, 476, 232, 489, 234, 364, 242, 243]	[42, 25, 20, 14, 130, 19, 119, 63, 143, 76, 97, 159, 197, 208, 233, 83, 99, 236, 73, 164, 262, 188, 309, 393, 109, 191, 230, 359, 409, 410, 15, 30, 31, 43, 48, 154, 166, 181, 187, 251, 253, 258, 300, 426, 21, 58, 59, 96, 108, 118, 125, 134, 136, 140, 149, 150, 165, 192, 201, 202, 205, 212, 221, 228, 238, 239, 259, 272, 274, 275, 282, 284, 285, 293, 302, 305, 323, 325, 328, 330, 347, 351, 352, 353…	0.949541	1	0.0504587	0.632879	0.0971916	0.737067	0.000552425	0.693879	0.0398079	0	0	36	50	5	27	45	64	4	4	0	1	21	34	1	2	1	1	2	2	1	1	0	7	0	0	1	3	0
CIAO1	ENSG00000144021.3	chr2	+	96268658	96269267	IR	FALSE	0.0211668	0.000117875	[0, 7, 2, 46, 9, 69, 53, 10, 21, 25, 87, 24, 38, 23, 34, 40, 44, 47, 48, 49, 52, 56, 74, 76, 79, 88, 89, 91, 93, 95, 102, 109]	[1, 6, 19, 15, 60, 29, 22, 62, 4, 58, 59, 37, 3, 16, 17, 61, 68, 70, 83, 85, 8, 27, 30, 36, 39, 67, 73, 90, 92, 105, 106, 107, 108, 110]	0.0340111	1	0.965989	0.18255	5.02822e-06	0.236694	0.0240174	0.215691	0.0122957	1	6	42	240	38	173	33	206	5	12	2	11	29	154	4	14	0	1	2	23	2	13	3	19	0	0	0	2	4
AHSA2P	ENSG00000173209.23	chr2	+	61185618	61186445	IR	FALSE	0.0211668	0.000117621	[0, 1, 18, 27, 29, 41, 64, 3, 7, 20, 23, 28, 12, 15, 36, 42, 70, 72, 84, 4, 13, 14, 16, 19, 24, 26, 37, 40, 43, 47, 48, 51, 56, 57, 58, 65, 68, 71, 73, 75, 78, 82, 85, 88, 89, 90]	[9, 10, 45, 52, 22, 30, 55, 5, 6, 8, 21, 33, 38, 44, 46, 50, 60, 62, 66, 69, 77, 83, 87]	0.72093	1	0.27907	0.319554	8.9519e-05	0.580383	0.052881	0.451271	0.0477574	3	8	6	14	5	18	11	26	1	7	1	4	7	20	1	3	0	0	0	0	0	0	0	0	0	2	0	0	1
GOPC	ENSG00000047932.14	chr6	-	117602003	117602497	AFJ	TRUE	0.0211668	0.000117868	[12, 7, 31, 3, 14, 45, 15, 46, 121, 19, 40, 93, 11, 28, 42, 54, 76, 85, 108, 5, 18, 21, 29, 30, 32, 38, 39, 47, 48, 50, 64, 72, 82, 84, 86, 87, 97, 114, 131, 132]	[0, 2, 6, 4, 13, 1, 8, 22, 68, 78, 26, 71, 67, 27, 104, 10, 37, 57, 73, 33, 77, 81, 20, 35, 51, 60, 61, 69, 75, 79, 98, 109, 113, 9, 49, 59, 63, 66, 74, 91, 95, 110, 111, 16, 17, 23, 24, 25, 34, 36, 41, 43, 44, 52, 53, 55, 56, 58, 62, 65, 70, 80, 83, 88, 89, 90, 92, 94, 96, 99, 100, 101, 102, 103, 105, 106, 107, 112, 115, 116, 117, 118, 119, 120, 122, 123, 124, 125, 126, 127, 128, 129, 130, 133, …	0.782123	0.102129	0.679994	0.864059	0.0200727	0.933119	2.18272e-06	0.919385	0.00252478	71	76	143	151	102	117	69	73	40	41	44	48	47	51	8	9	6	7	1	2	6	6	0	2	1	7	0	0	4
STK16	ENSG00000115661.14	chr2	+	219248420	219250336	ALJ	TRUE	0.0212325	0.000118503	[22, 17, 51, 76, 70, 57, 73, 74]	[0, 27, 20, 31, 4, 7, 46, 13, 15, 19, 41, 59, 24, 12, 35, 14, 25, 60, 38, 37, 39, 61, 10, 11, 36, 64, 2, 3, 34, 44, 48, 50, 65, 67, 1, 5, 9, 16, 23, 29, 30, 33, 49, 58, 66, 6, 8, 18, 21, 26, 28, 32, 40, 42, 43, 45, 47, 52, 53, 54, 55, 56, 62, 63, 68, 69, 71, 72, 75, 77, 79, 80, 81]	0.309524	0.721116	0.411592	0.855387	0.000875931	0.923776	0.0370175	0.89381	0.0177933	3	3	10	10	4	5	10	13	3	3	2	2	18	21	6	6	0	0	13	14	4	5	7	10	0	0	9	11	1
CD300LF	ENSG00000186074.19	chr17	-	74670061	74672982	ALJ	TRUE	0.0212797	0.000119029	[1, 4, 2, 6, 21, 7, 14, 18, 12, 28, 34, 50, 51, 10, 13, 25, 27, 29, 32, 33, 36, 46, 48, 5, 11, 15, 16, 17, 22, 23, 24, 26, 31, 35, 37, 38, 39, 40, 41, 42, 43, 44, 45, 47, 49, 52, 53, 54, 55, 56, 57]	[3, 19, 8, 20, 0, 9, 30]	0.127854	0.176471	0.0486167	0		0.13612	8.84608e-06	0.0537409	0.00422764	0	0	0	0	0	0	0	0	0	0	0	0	0	0	0	0	0	3	0	31	0	10	0	6	0	0	0	10	0
TMX3	ENSG00000166479.10	chr18	-	68687765	68689947	3AS	TRUE	0.0215379	0.000120739	[129, 15, 132, 166, 64, 164, 190, 237, 110, 157, 205, 230, 539, 294, 322, 201, 207, 382, 523, 280, 546, 291, 295, 308, 310, 312, 313, 216, 356, 121, 133, 519, 137, 268, 269, 526, 271, 532, 281, 282, 413, 541, 551, 298, 299, 555, 559, 432, 561, 562, 182, 314, 566, 444, 569, 318, 321, 326, 329, 330, 460, 208, 217, 349, 481, 488, 233, 490, 107, 244, 245, 502, 247, 123, 605]	[34, 200, 193, 219, 213, 386, 92, 199, 587, 359, 243, 117, 119, 509, 512, 513, 260, 521, 402, 297, 568, 197, 459, 479, 480, 234, 366, 369, 378, 383, 597]	1	1	0	0.496749	0.0594307	0.181732	0.00405949	0.339558	0.0482034	6	11	17	21	9	24	12	13	9	15	3	13	6	9	1	1	0	4	2	2	2	2	1	4	0	0	0	0	0
IFI16	ENSG00000163565.19	chr1	+	159053724	159054819	IR	TRUE	0.0219067	0.000123085	[96, 467, 58, 995, 1151, 371, 918, 893, 863, 1476]	[28, 118, 30, 42, 220, 117, 92, 207, 696, 242, 356, 542, 119, 160, 520, 729, 491, 1009, 1013, 619, 215, 778, 800, 348, 433, 12, 40, 49, 569, 580, 706, 1239, 745, 749, 752, 763, 260, 827, 324, 837, 343, 363, 378, 399, 430, 496, 552, 562, 566, 1096, 611, 1141, 647, 657, 1174, 167, 680, 693, 704, 705, 210, 734, 223, 736, 740, 744, 756, 1291, 1292, 794, 833, 843, 1362, 851, 858, 861, 354, 867, 386, 4…	0.0666667	0.314534	0.247867	0.841787	0.00366079	0.968469	3.58652e-07	0.904866	0.0038656	19	23	49	51	30	34	24	25	14	18	20	27	20	24	6	10	1	2	3	3	1	1	0	0	0	0	1	1	0
CDK5RAP1	ENSG00000101391.21	chr20	-	33395116	33396760	3AS	TRUE	0.0219067	0.000123348	[3, 1, 5, 13, 11, 2, 108, 21, 54, 19, 96, 116, 167, 43, 4, 9, 23, 45, 169, 7, 8, 31, 63, 79, 95, 100, 179, 196, 237, 254, 93, 119, 130, 146, 162, 241, 6, 14, 51, 74, 99, 112, 122, 123, 158, 166, 175, 193, 224, 248, 22, 42, 65, 70, 71, 72, 75, 88, 97, 98, 102, 105, 127, 128, 133, 141, 155, 161, 170, 194, 198, 210, 211, 214, 253, 255, 256, 263, 287, 295, 301, 309, 313, 328, 10, 17, 20, 28, 29, 34, …	[32, 37, 251, 165, 215, 144, 240, 258, 25, 156, 30, 332, 78, 339, 217, 218, 267, 18, 62, 319, 66, 68, 325, 326, 330, 77, 221, 231, 242, 245, 246, 120, 252]	0.671012	0.967742	0.29673	0.100564	0.00618661	0.00987397	0.000178014	0.0539066	0.00579804	0	17	15	89	17	89	16	94	0	15	1	9	0	66	1	16	0	0	0	4	0	14	0	19	0	0	0	3	1
HACL1	ENSG00000131373.15	chr3	-	15573242	15579909	3AS	TRUE	0.021961	0.000123925	[65, 56, 60, 58, 113, 112, 190, 30, 97, 272, 145, 149, 187, 266, 50, 67, 71, 75, 79, 152, 163, 208, 221, 237, 260, 264, 288, 295, 309, 314, 336, 373, 378, 19, 34, 39, 43, 55, 59, 61, 63, 66, 70, 73, 76, 77, 78, 81, 83, 85, 87, 89, 95, 96, 98, 100, 102, 103, 130, 147, 150, 154, 157, 165, 166, 168, 171, 180, 182, 186, 197, 199, 200, 202, 203, 206, 220, 230, 232, 238, 240, 241, 273, 277, 285, 291, 2…	[249, 109, 302, 287, 290, 399, 20, 18, 403, 289, 292, 54, 321, 117, 248, 122, 123, 256, 384, 259, 132, 133, 388, 263, 389, 267, 268, 16, 401, 275, 405, 407, 413, 32, 294, 45, 301, 47, 49, 306, 307, 308, 53, 316, 318, 320, 324, 326, 331, 357, 250, 247, 253, 254, 255]	0.991189	1	0.00881057	0.491237	0.0667948	0.0904151	0.031062	0.302405	0.0954543	11	11	6	11	1	13	25	47	9	15	5	16	3	17	0	1	1	1	0	1	3	4	0	4	0	0	0	1	0
UCHL5	ENSG00000116750.14	chr1	-	193029657	193049745	ES	TRUE	0.0222198	0.00012566	[3, 1, 5, 2, 14, 13, 8, 22, 25, 19, 56, 63, 78, 95, 4, 29, 94, 20, 28, 48, 76, 92, 116, 91, 58, 77, 104, 170, 7, 30, 31, 32, 35, 61, 62, 66, 86, 87, 98, 100, 107, 109, 110, 111, 114, 117, 121, 130, 133, 143, 171, 177, 203, 6, 10, 11, 12, 16, 17, 21, 23, 27, 34, 36, 40, 41, 43, 44, 45, 46, 47, 54, 55, 57, 59, 64, 69, 72, 74, 75, 82, 83, 84, 89, 90, 96, 101, 105, 106, 108, 112, 118, 120, 122, 124, …	[18, 42, 80, 26, 184, 128, 15, 144, 145, 33, 162, 50, 53, 188, 71, 205, 131, 134, 149, 154, 164, 37, 165, 49, 52, 180, 185, 186, 187, 190, 191, 65, 67, 197, 73, 209, 212, 215, 217, 219, 93, 223, 226, 228]	0.080402	0.889908	0.809506	0.13479	0.0103528	0.0274829	0.00100848	0.0853621	0.00877332	1	24	2	31	5	37	2	23	5	52	2	38	3	24	1	21	2	15	6	29	3	8	10	21	0	36	1	2	2
BAZ1A	ENSG00000198604.11	chr14	-	34800339	34800390	ALJ	TRUE	0.0227638	0.000129017	[0, 20, 21, 9, 35, 1, 130, 87, 7, 23, 15, 61, 39, 93, 411, 2, 224, 22, 5, 30, 211, 8, 32, 41, 127, 197, 304, 18, 220, 387, 446, 26, 108, 153, 14, 77, 252, 208, 236, 366, 367, 63, 113, 123, 235, 19, 448, 106, 301, 359, 210, 274, 36, 199, 13, 136, 189, 44, 60, 131, 384, 386, 424, 436, 48, 54, 65, 79, 89, 203, 260, 329, 358, 369, 398, 421, 435, 447, 494, 531, 88, 117, 216, 226, 232, 296, 356, 408, 4…	[24, 370, 201, 25, 276, 426, 212, 277, 406, 281, 548, 549, 550, 428, 429, 574, 69, 337, 468, 219, 609]	0.179064	1	0.820936	0.0613955	0.00173957	0.186596	0.0489641	0.134743	0.0233259	3	65	4	110	3	243	4	65	4	53	2	53	5	79	6	10	3	30	15	267	4	83	12	309	2	7	6	56	6
AC092821.3	ENSG00000284634.1	chr12	+	9448296	9448878	AFJ	TRUE	0.022768	0.000129603	[8, 16, 1, 9, 11, 34, 0, 18, 21, 10, 20, 35, 37, 42, 60, 72, 74, 15, 23, 33, 36, 39, 45, 49, 57, 65, 71, 73, 84, 13, 14, 17, 19, 22, 24, 25, 26, 27, 28, 29, 30, 38, 40, 41, 43, 44, 46, 47, 48, 54, 55, 56, 58, 59, 61, 62, 63, 64, 66, 67, 68, 70, 79, 85, 86, 87, 88, 96, 104, 107]	[2, 5, 69, 78, 82, 83, 3, 4, 6, 7, 12, 31, 32, 50, 51, 52, 53, 75, 76, 77, 80, 81, 89, 90, 91, 92, 93, 94, 95, 97, 98, 99, 100, 101, 102, 103, 105, 106, 108, 109]	0.995614	1	0.00438596	0.515949	0.133379	0.0488039	3.86601e-06	0.321768	0.117422	2	24	1	7	5	7	6	7	0	18	0	11	3	7	4	8	0	0	1	1	0	1	0	1	0	0	0	0	0
IVNS1ABP	ENSG00000116679.16	chr1	-	185309511	185311098	IR	TRUE	0.022768	0.000129375	[335, 19, 95, 363, 72, 384, 602, 426, 653, 539, 574, 588, 892, 1159, 1043, 1089, 714, 334, 638, 396, 911, 530, 275, 404, 914, 549, 303, 945, 1086, 204, 1117, 734, 351, 481, 355, 101, 1126, 881, 1139, 373, 1141]	[50, 647, 679, 942, 283, 699, 707, 214, 257, 1034, 1047, 674, 806, 1077, 313, 833, 977, 979, 981, 91, 609, 1127]	1	1	0	0.305702	0.0142387	0.0713837	0.0662525	0.235077	0.0370818	0	0	1	2	0	1	2	3	0	0	0	0	1	3	0	0	0	0	13	45	0	2	2	2	0	0	0	1	4
G2E3	ENSG00000092140.16	chr14	+	30597526	30598099	IR	TRUE	0.0228281	0.000130227	[20, 61, 47, 104, 124, 151, 168, 78, 149, 169, 92, 128, 129, 162, 170, 178, 89, 100, 120, 134, 136, 22, 23, 150, 29, 161, 171, 45, 174, 177, 179, 180, 183, 188, 190, 63, 193, 198, 200, 80, 99, 105, 109, 114, 118, 119, 122, 123, 207, 209]	[27, 10, 28, 148, 79, 16, 50, 72, 15, 59, 64, 65, 73, 93, 142, 164, 40, 191, 90, 101, 107, 121, 133, 11, 152, 153, 165, 46, 175, 181, 184, 57, 185, 189, 62, 194, 195, 68, 196, 75, 87, 94, 96, 97, 103, 108, 110, 206]	1	1	0	0.394867	0.0200248	0.702247	0.00210337	0.541664	0.036606	1	3	4	7	7	17	4	15	10	20	8	16	3	9	0	1	2	7	2	6	1	4	2	24	0	0	0	1	3
SENP7	ENSG00000138468.16	chr3	-	101324275	101326080	ALJ	TRUE	0.0229833	0.000131396	[125, 10, 46, 98, 34, 39, 239, 47, 124, 143, 158, 206, 225, 286, 58, 107, 207, 226, 287, 9, 11, 32, 40, 96, 97, 121, 144, 159, 160, 164, 175, 185, 186, 195, 196, 197, 198, 254, 264, 265, 278, 282, 288, 292, 293, 309, 310, 316]	[2, 7, 4, 13, 0, 19, 3, 1, 15, 60, 12, 14, 65, 18, 73, 102, 116, 86, 74, 113, 87, 94, 148, 6, 25, 33, 36, 37, 54, 71, 99, 103, 21, 43, 49, 55, 75, 83, 93, 106, 114, 128, 153, 173, 181, 218, 221, 224, 229, 241, 248, 20, 29, 41, 42, 53, 61, 67, 68, 77, 78, 85, 95, 100, 108, 111, 126, 127, 134, 136, 139, 141, 145, 146, 152, 155, 156, 168, 187, 200, 208, 211, 216, 217, 220, 228, 230, 232, 233, 235, 2…	0.244444	0.337594	0.0931495	0.814518	0.033595	0.927849	4.36599e-06	0.878931	0.00981619	63	73	98	104	108	117	59	68	26	38	33	37	35	36	8	8	6	8	0	0	4	4	3	3	0	9	0	2	6
TP53BP1	ENSG00000067369.14	chr15	-	43471267	43473132	ALJ	TRUE	0.0233764	0.000133932	[3, 42, 4, 6, 43, 102, 117, 58, 38, 95, 96, 97, 131, 90, 7, 31, 76, 114, 127, 130, 140, 142, 11, 13, 15, 17, 20, 23, 34, 39, 51, 56, 63, 81, 83, 89, 108, 132, 146, 147, 5, 8, 12, 14, 16, 18, 19, 21, 22, 24, 25, 27, 29, 30, 35, 37, 40, 41, 46, 47, 48, 49, 52, 53, 55, 59, 60, 61, 62, 64, 65, 66, 67, 68, 69, 71, 72, 73, 74, 75, 77, 78, 79, 80, 82, 84, 86, 87, 88, 91, 92, 93, 98, 100, 101, 103, 104, …	[45, 44]	0.217153	0	0.217153	0.195903	0.038816	0.0587394	0.0552604	0.124795	0.0444255	3	4	1	10	4	20	0	16	1	3	4	6	0	7	0	0	0	0	0	3	0	2	0	5	0	0	0	0	0
UBA7	ENSG00000182179.13	chr3	-	49812543	49813061	ES	FALSE	0.0234426	0.000135105	[161, 172, 10, 44, 160, 339, 370, 206, 87, 230, 241, 345, 411, 413, 21, 71, 108, 123, 185, 238, 259, 260, 297, 303, 340, 392, 423, 426, 9, 37, 46, 47, 54, 61, 62, 67, 73, 77, 78, 79, 84, 92, 99, 100, 101, 109, 111, 119, 122, 130, 131, 137, 138, 139, 142, 146, 153, 209, 213, 218, 221, 256, 269, 276, 277, 308, 313, 316, 320, 325, 333, 353, 366, 368, 371, 393, 402, 407, 420, 435, 447, 450, 451, 452,…	[1, 0, 75, 72, 18, 187, 20, 30, 105, 164, 12, 14, 154, 162, 57, 170, 217, 354, 26, 39, 210, 58, 83, 93, 132, 169, 233, 3, 55, 127, 136, 182, 195, 208, 237, 13, 28, 167, 171, 201, 307, 349, 352, 359, 17, 31, 41, 85, 90, 96, 157, 158, 159, 165, 166, 168, 173, 174, 181, 188, 190, 234, 236, 266, 315, 336, 341, 350, 351, 357, 394, 431, 6, 33, 40, 43, 52, 53, 82, 89, 98, 124, 126, 128, 134, 156, 180, 1…	1	0.39635	0.60365	0.807805	0.0127917	0.926824	0.000232337	0.885137	0.004993	0	0	7	8	7	9	24	29	0	0	0	0	36	38	0	0	0	0	18	24	1	1	4	5	0	0	6	8	1
CDC7	ENSG00000097046.13	chr1	+	91500948	91501636	IR	TRUE	0.0234426	0.000135178	[39, 226, 144, 50, 54, 257, 268, 273, 276, 136, 73, 233, 76, 270, 48, 51]	[21, 16, 58, 28, 72, 14, 29, 42, 138, 153, 182, 71, 93, 94, 96, 12, 277, 41, 180, 185, 304]	0.137931	1	0.862069	0.263106	0.0464934	0.88441	0.0596266	0.514184	0.158593	0	2	4	4	1	1	0	0	0	2	1	1	0	0	0	0	0	1	0	8	0	0	0	2	0	0	0	0	0
LINC00377	ENSG00000229246.2	chr13	+	80652591	80753844	ES	TRUE	0.0234426	0.00013518	[110, 9, 134, 43, 19, 53, 21]	[70, 8, 50, 0, 7, 55, 78, 5, 6, 20, 31, 40, 51, 54, 60, 61, 64, 66, 67, 86, 118, 123, 129, 1, 3, 11, 12, 13, 15, 16, 17, 18, 22, 23, 24, 26, 27, 28, 32, 33, 34, 35, 36, 37, 38, 41, 42, 44, 46, 47, 48, 52, 56, 57, 59, 62, 63, 72, 73, 74, 75, 76, 77, 79, 80, 81, 82, 83, 84, 85, 87, 88, 89, 90, 91, 93, 94, 95, 96, 97, 98, 99, 100, 101, 102, 103, 104, 105, 106, 107, 108, 113, 114, 115, 119, 120, 122,…	1	1	0	0.666667	0.222221	0.945974	3.44873e-06	0.835783	0.0504094	1	1	16	16	0	0	0	5	0	0	3	3	18	18	0	0	0	0	0	0	0	0	0	0	0	0	0	0	0
ZNF860	ENSG00000197385.6	chr3	+	31988659	31992144	ALJ	TRUE	0.023745	0.000137217	[3, 11, 13, 41, 19, 24, 6, 21, 31, 18, 25, 55, 26, 10, 54, 16, 36, 76, 28, 38, 46, 40, 43, 23, 42, 44, 45, 60, 4, 8, 22, 32, 33, 35, 48, 52, 56, 58, 62, 67, 69, 73, 78, 84, 92, 9, 14, 15, 17, 27, 29, 30, 37, 39, 47, 49, 50, 51, 53, 57, 59, 61, 63, 64, 66, 68, 70, 71, 72, 74, 77, 79, 80, 81, 82, 83, 85, 86, 87, 88, 89, 90, 91, 93, 94, 95, 96, 97, 98, 99, 100, 101, 102, 104, 106, 107, 108, 109, 110…	[1, 0, 2, 5, 7, 75, 20, 103, 34, 65, 105, 112]	0.916139	0.184584	0.731555	0.492883	3.10141e-05	0.427178	0.0749977	0.466808	0.0500949	24	40	64	125	45	106	15	35	21	43	11	17	52	108	7	12	0	0	0	0	0	0	0	0	0	0	0	0	0
MS4A1	ENSG00000156738.18	chr11	+	60464852	60465920	IR	TRUE	0.0238843	0.000138317	[36, 111, 70, 192, 538, 136, 438, 541, 422, 434, 589, 280, 181, 356, 546, 552, 567, 321, 606, 612, 657, 539, 578, 580, 585, 587, 588, 592, 598, 602, 605, 620, 630]	[4, 29, 13, 1, 33, 0, 30, 223, 112, 285, 97, 261, 290, 255, 197, 326, 474, 297, 512, 53, 132, 269, 411, 308, 312, 449, 248, 513, 408, 671, 301, 309, 573, 318, 575, 327, 471, 478, 265, 399, 405, 406, 432, 433, 450, 334, 213, 472, 607, 229, 359, 236, 492, 494, 369, 501, 502, 508, 382, 785, 714, 717, 722, 723, 724, 744]	0.998405	0.914454	0.0839508	0.599152	0.0256355	0.92387	0.00358793	0.799234	0.0352529	49	71	73	145	221	361	94	231	49	139	55	124	15	17	7	10	0	0	0	0	0	0	0	0	0	0	0	0	0
BTN2A1	ENSG00000112763.17	chr6	+	26463525	26465200	3AS	TRUE	0.024009	0.000139335	[91, 210, 222, 33, 257, 272, 112, 295, 90, 94, 99, 114, 246, 271, 274, 276, 28, 285, 297, 212, 214, 217]	[0, 6, 17, 4, 7, 8, 5, 21, 12, 11, 38, 23, 55, 18, 236, 133, 15, 75, 60, 292, 62, 98, 145, 153, 158, 3, 22, 190, 215, 2, 45, 49, 59, 72, 84, 156, 252, 288, 289, 26, 27, 52, 61, 85, 89, 104, 135, 147, 157, 175, 191, 199, 206, 238, 239, 258, 262, 293, 303, 16, 19, 25, 29, 31, 32, 34, 35, 36, 37, 39, 41, 42, 44, 46, 51, 53, 54, 57, 58, 63, 66, 70, 77, 80, 88, 97, 103, 105, 107, 113, 120, 123, 125, 1…	1	0.621175	0.378825	0.877127	0.0164996	0.99238	0.000106848	0.935486	0.0117018	1	3	33	33	52	58	26	34	6	6	12	12	51	52	5	5	3	3	7	11	13	13	24	34	0	0	1	2	1
CLINT1	ENSG00000113282.14	chr5	-	157789513	157790599	3AS	TRUE	0.0242256	0.000141191	[18, 47, 139, 125, 216, 138, 134, 42, 347, 245, 263, 292, 79, 218, 357, 394, 401, 276, 290, 295, 304, 191, 199, 214, 88, 472, 248, 133, 395, 396, 405, 283, 412, 413, 287, 415, 416, 35, 417, 421, 299, 428, 176, 433, 434, 435, 436, 437, 439, 313, 317, 320, 453, 455, 456, 332, 460, 470, 349, 232, 234, 235, 364, 250]	[43, 124, 147, 406, 163, 217, 355, 123, 381, 265, 306, 348, 130, 404, 425, 426, 431, 187, 205, 461, 468, 469, 471, 475, 478, 493, 495, 240, 117, 249, 383]	0.868365	0.912	0.0436348	0.147184	0.011671	0.276713	5.77677e-05	0.209977	0.0100169	4	17	2	26	0	36	2	20	2	17	4	32	0	15	0	2	0	1	1	7	1	9	15	62	0	0	1	2	0
BZW1	ENSG00000082153.18	chr2	+	200820120	200821170	IR	TRUE	0.0242256	0.000141108	[11, 272, 279, 407, 387, 365]	[7, 39, 162, 89, 9, 269, 169, 100, 138, 141, 164, 218, 224, 299, 184, 82, 216, 110, 135, 263, 278, 284, 314, 319, 340, 382, 136, 139, 266, 16, 270, 275, 403, 406, 153, 410, 157, 412, 288, 289, 418, 167, 434, 440, 317, 445, 449, 322, 197, 454, 201, 79, 213, 86, 214, 222, 226, 229, 240, 374, 125]	0.0833333	0.75	0.666667	0.658817	0.0521421	0.940483	2.40658e-05	0.774862	0.0431479	14	20	36	39	50	60	39	41	7	16	12	13	15	16	3	4	2	2	6	18	15	21	5	11	0	0	0	0	9
ELP2	ENSG00000134759.14	chr18	+	36145507	36145933	IR	TRUE	0.0247551	0.000144582	[505, 621, 530, 444, 544, 640, 552, 138, 44, 528]	[124, 134, 166, 219, 221, 294, 417, 120, 131, 217, 232, 243, 293, 308, 327, 502, 145, 223, 298, 337, 339, 347, 378, 415, 428, 464, 484, 537, 549, 553, 568, 570, 590, 84, 112, 115, 119, 643, 149, 662, 152, 167, 173, 688, 185, 195, 201, 215, 246, 251, 253, 254, 265, 266, 273, 280, 285, 291, 309, 310, 311, 313, 314, 318, 322, 326, 330, 338, 343, 348, 356, 357, 371, 386, 387, 388, 391, 395, 407, 425,…	1	1	0	0.683132	0.051799	0.994109	3.40098e-07	0.84198	0.0598655	3	5	8	8	10	10	3	5	5	8	8	9	4	4	0	0	0	0	0	0	0	2	0	0	0	0	0	0	1
LINC01410	ENSG00000238113.7	chr9	+	62811938	62813488	ALJ	TRUE	0.0248499	0.000145443	[2, 0, 12, 35, 3, 16, 21, 34, 6, 9, 11, 17, 23, 25, 38, 39, 40, 49, 5, 7, 19, 36, 42, 44, 47, 54, 4, 14, 28, 29, 30, 31, 32, 37, 41, 43, 45, 46, 48, 50, 51, 52, 53, 55, 56, 58, 59, 60, 61]	[10, 27, 22, 15, 18, 8, 1, 33, 13, 20, 24, 57, 26, 62]	1	1	0	0.324322	0.0155251	0.0234921	0.00216558	0.201565	0.032536	5	11	5	11	6	13	11	26	11	19	1	5	0	0	1	3	0	10	0	1	3	10	0	0	0	4	0	1	0
RAD21	ENSG00000164754.15	chr8	-	116858458	116861840	ME	TRUE	0.0257658	0.000151122	[73, 70, 262, 189, 171, 173, 191, 465, 611, 252, 317, 502, 622, 289, 245, 392, 326, 605, 381, 316, 473, 699, 230, 792, 396, 446, 451, 604, 698, 188, 700, 711, 278, 280, 808, 431, 490, 681, 701, 712, 732, 221, 735, 757, 759, 268, 314, 377, 393, 409, 422, 489, 507, 532, 534, 592, 614, 615, 617, 620, 626, 643, 644, 669, 671, 673, 675, 168, 680, 692, 693, 694, 705, 719, 736, 738, 741, 751, 754, 244, …	[55, 210, 196, 217, 298, 313, 249, 602, 247, 251, 499, 319, 209, 336, 607, 782, 169, 506, 768, 778, 667, 284, 413, 417, 548, 295, 809, 689, 433, 822, 457, 331, 205, 461, 720, 595, 468, 343, 624, 368, 369, 756, 373, 636, 383]	0.0264511	0.0248619	0.00158926	0.156602	0.00849617	0.328541	0.00506832	0.236988	0.0170893	9	25	19	53	13	109	26	95	4	30	3	27	5	43	5	12	0	2	0	14	3	24	24	276	0	0	0	6	3
ZNF638	ENSG00000075292.19	chr2	+	71418639	71428546	3AS	TRUE	0.0258788	0.000152415	[108, 80, 390, 186, 352, 751, 240, 166, 196, 211, 507, 253, 386, 776, 650, 532, 534, 412, 293, 688, 179, 691, 443, 343, 602, 351, 613, 760]	[267, 544, 79, 142, 550, 157, 545, 176, 570, 580, 453, 617, 384, 641, 646, 656, 665, 540, 160, 674, 553, 563, 824, 829, 836, 74, 587, 763, 637]	1	0.883333	0.116667	0.592758	0.0367835	0.094338	0.0299032	0.319047	0.0927838	9	10	10	11	5	20	8	10	4	6	2	5	0	3	0	0	2	3	0	0	0	1	0	0	0	0	0	0	0
ZC3H11A	ENSG00000058673.17	chr1	+	203801639	203802651	3AS	TRUE	0.0258788	0.000152424	[200, 210, 287, 466, 85, 536]	[100, 102, 113, 266, 482, 97, 167, 718, 148, 237, 651, 145, 547, 548, 695, 250, 258, 131, 637, 265, 401, 274, 150, 541, 294, 295, 298, 316, 89, 227, 483, 744, 746, 238, 247, 249, 253]	1	1	0	0.979847	0.000387393	0.591114	0.000164387	0.841769	0.052623	0	0	11	13	9	9	3	3	0	0	2	2	5	5	0	0	4	4	1	1	0	0	7	7	0	0	0	0	0
CARD8	ENSG00000105483.18	chr19	-	48231824	48232452	IR	TRUE	0.0264389	0.000156049	[1190, 1573, 1542, 1055, 1574, 45, 307, 311, 57, 59, 1468, 1470, 63, 197, 1611, 1620, 1132, 1521, 244, 1526]	[402, 537, 1030, 309, 346, 1028, 534, 1232, 734, 1034, 591, 403, 1036, 529, 536, 1062, 670, 1229, 1230, 308, 888, 404, 1024, 528, 1057, 1592, 601, 604, 1129, 118, 646, 1178, 732, 733, 735, 1264, 1270, 857, 860, 472, 1010, 1022, 1025, 1539, 1541, 1045, 1591, 1593, 590, 1102, 594, 597, 598, 88, 1147, 124, 638, 645, 136, 649, 656, 1169, 1172, 662, 665, 1177, 672, 674, 675, 676, 179, 202, 205, 210, 1…	1	0.917031	0.0829694	0.673088	0.0894576	1		0.796174	0.0901795	6	7	11	12	38	41	9	9	3	3	3	3	12	12	1	1	0	2	0	0	0	0	0	0	0	0	0	0	1
KLHDC4	ENSG00000104731.14	chr16	-	87730644	87748672	3AS	TRUE	0.0268199	0.000158629	[4, 5, 3, 10, 13, 43, 51, 11, 23, 27, 37, 45, 55, 65, 2, 6, 9, 12, 17, 18, 20, 21, 28, 29, 30, 32, 33, 34, 35, 36, 38, 40, 41, 42, 48, 49, 50, 52, 53, 54, 56, 58, 59, 60, 61, 62, 63, 70, 72, 73, 74, 75, 78, 80, 85, 86, 89, 91, 94, 96]	[25, 19, 15, 81, 87, 64, 66, 67, 68, 69, 14, 82, 84, 26]	0.278302	0.264706	0.013596	0.289665	0.0611226	0.0166549	8.43581e-07	0.157538	0.0479647	0	0	0	5	0	4	4	13	2	3	1	2	0	4	2	10	0	0	5	5	1	3	1	1	0	0	1	4	0
FERMT3	ENSG00000149781.13	chr11	+	64206720	64206814	AFJ	TRUE	0.0268983	0.000159425	[37, 20, 52, 6, 25, 64, 92, 96, 99, 223, 27, 39, 61, 78, 115, 5, 73, 80, 104, 105, 150, 165, 174, 22, 24, 40, 51, 70, 72, 101, 109, 129, 169, 179, 186, 21, 23, 26, 28, 29, 43, 50, 53, 54, 74, 83, 98, 100, 102, 103, 106, 113, 118, 122, 124, 152, 153, 154, 155, 156, 157, 173, 191, 201, 222, 224, 225, 233]	[0, 2, 18, 7, 12, 8, 36, 86, 79, 4, 13, 9, 48, 82, 85, 35, 45, 11, 66, 84, 30, 46, 75, 10, 32, 44, 58, 89, 176, 196, 57, 62, 63, 77, 149, 208, 213, 19, 41, 59, 65, 71, 81, 88, 97, 127, 128, 177, 214, 1, 17, 33, 47, 68, 93, 95, 108, 114, 121, 126, 131, 140, 142, 145, 159, 161, 168, 197, 199, 206, 207, 211, 212, 216, 221, 3, 14, 15, 16, 31, 34, 38, 42, 49, 55, 56, 60, 67, 69, 76, 87, 90, 91, 94, 10…	0.640394	0.124583	0.515811	0.747599	0.0680716	0.921151	0.000916373	0.878662	0.0102315	0	0	2	2	1	2	17	21	0	0	0	0	6	6	0	1	0	0	207	211	5	5	49	53	0	2	133	145	2
DGCR2	ENSG00000070413.20	chr22	-	19057162	19063201	3AS	TRUE	0.0271385	0.000161789	[1, 15, 11, 0, 5, 13, 12, 2, 44, 77, 16, 9, 43, 67, 70, 6, 64, 69, 73, 7, 8, 10, 14, 20, 21, 24, 27, 30, 34, 40, 41, 42, 46, 47, 48, 53, 54, 60, 61, 62, 63, 65, 72, 80, 81]	[29, 86, 79, 32, 88, 28, 31]	0.0849858	0	0.0849858	0.136775	0.000135015	0		0.0574691	0.00891582	0	0	0	0	0	1	0	1	0	0	0	0	0	0	0	0	0	0	0	11	0	0	0	2	0	0	4	19	0
CCNC	ENSG00000112237.13	chr6	-	99550592	99550992	IR	TRUE	0.0271385	0.000161854	[115, 45, 19, 106, 16, 22, 26, 182, 191, 135, 9, 20, 152, 154, 28, 30, 41, 175, 48, 177, 181, 183, 212, 86, 214, 215, 219, 117, 127]	[32, 73, 63, 39, 77, 54, 87, 114, 132, 130, 67, 82, 213, 129, 144, 150, 151, 153, 34, 43, 56, 58, 196, 75, 203, 104, 112, 116, 120, 225, 227]	1	1	0	0.441453	0.10572	0.849956	0.0830753	0.620232	0.142317	12	15	11	13	18	18	11	16	3	9	7	7	13	15	7	11	0	1	0	1	0	4	0	2	0	2	0	0	1
MARCHF6	ENSG00000145495.16	chr5	+	10400842	10402058	ES	TRUE	0.0271385	0.000161306	[0, 1, 230, 20, 490, 17, 53, 62, 243, 65, 138, 125, 317, 136, 1257, 30, 96, 294, 92, 543, 147, 227, 987, 67, 298, 491, 351, 126, 163, 378, 90, 646, 161, 239, 296, 299, 365, 1159, 1433, 37, 57, 222, 297, 489, 584, 1328, 389, 402, 497, 594, 905, 1182, 1331, 1452, 27, 60, 338, 473, 500, 900, 1065, 1141, 1167, 1231, 51, 81, 137, 217, 434, 499, 566, 809, 852, 1126, 1146, 1166, 1192, 1204, 1221, 1337, …	[11, 34, 32, 1169, 692, 322, 553, 1667, 1333, 838, 985, 578, 1656, 1680, 171, 1232, 1332, 970, 1499, 1033, 1576, 1068, 1642, 1649, 1178, 1696, 1721, 1213, 1234, 1236, 1275, 261, 1318, 1320, 1323, 1336, 1362, 1373, 934, 435, 445, 972, 1493, 1517, 1037, 1038, 1041, 537, 1050, 31, 1056, 33, 1568, 44, 1584, 1586, 564, 1595, 1601, 1602, 1605, 1614, 1105, 1620, 85, 1627, 1629, 1117, 1632, 1633, 1640, 1…	0.221526	1	0.778474	0.063935	0.0044271	0.0282716	7.12163e-05	0.0467542	0.00193246	0	50	13	167	9	233	40	181	2	51	7	53	4	184	1	25	0	14	9	91	5	51	60	626	0	0	13	76	6
AC079466.1	ENSG00000266976.3	chr19	+	28611190	28611972	IR	TRUE	0.027675	0.000165395	[4, 37, 14, 6, 86, 32, 3, 5, 31, 123, 126, 73, 20, 130, 125, 132, 0, 167, 63, 151, 204, 84, 220, 136, 264, 166, 174, 175, 185, 197, 77, 115, 116, 247, 133, 137, 259, 262, 141, 143, 266, 19, 150, 154, 173, 177, 180, 183, 186, 190, 194, 196, 198, 199, 81, 211, 254, 88, 216, 217, 224, 225, 227, 231, 234, 238, 239, 241, 246, 250, 252, 127]	[7, 13, 16, 17, 25, 45, 44, 83, 46, 26, 82, 90, 48, 155, 138, 129, 54, 169, 101, 56, 36, 41, 171, 59, 65, 76, 92, 152, 34, 60, 210, 222, 230, 134, 139, 140, 146, 147, 148, 153, 158, 159, 161, 162, 38, 179, 66, 74, 203, 207, 209, 214, 219, 93, 103, 104, 233, 111, 112, 113, 240, 242, 117, 120, 249]	0.118367	0.979205	0.860838	0.40359	7.91808e-06	0.735927	0.000121441	0.56961	0.0250838	0	0	0	0	0	0	0	0	0	0	0	0	0	0	0	0	0	0	0	0	0	0	0	0	0	0	0	0	0
PSMC6	ENSG00000100519.12	chr14	+	52718142	52718239	IR	TRUE	0.0278526	0.0001668	[46, 282, 176, 241, 227, 368, 242, 262, 269, 275, 26, 411, 417, 328, 222, 357, 363, 238, 371, 116, 246, 250, 254, 423, 424]	[3, 102, 31, 107, 70, 103, 142, 172, 6, 111, 122, 163, 64, 90, 114, 125, 150, 152, 156, 178, 223, 230, 78, 112, 115, 128, 133, 137, 161, 185, 210, 229, 232, 237, 239, 280, 400, 410, 27, 35, 36, 37, 39, 43, 58, 69, 80, 85, 93, 97, 104, 117, 121, 130, 134, 140, 148, 154, 155, 166, 173, 175, 177, 183, 199, 201, 202, 212, 215, 216, 218, 226, 234, 264, 270, 271, 273, 305, 354, 389, 393, 394, 395, 413,…	1	0.864979	0.135021	0.716913	0.0464453	0.979731	0.000190506	0.834554	0.0437475	15	15	9	12	10	14	10	19	11	15	3	4	7	8	1	2	2	3	1	1	2	2	2	2	0	10	0	0	1
HMGCR	ENSG00000113161.16	chr5	+	75359412	75359984	IR	TRUE	0.0280528	0.000168346	[346, 373, 159, 390, 424, 393]	[11, 12, 138, 4, 173, 184, 137, 50, 112, 240, 258, 49, 329, 270, 276, 160, 196, 74, 248, 135, 271, 177, 178, 181, 186, 309, 193, 324, 325, 331, 213, 105, 241, 369, 266, 15, 16, 147, 20, 275, 407, 151, 153, 154, 281, 410, 287, 415, 162, 35, 292, 296, 300, 47, 180, 305, 308, 187, 311, 438, 445, 68, 69, 197, 332, 206, 335, 337, 212, 340, 356, 242, 123, 252, 448]	0.0833333	1	0.916667	0.864212	0.0313537	0.894791	0.0941219	0.855096	0.0742339	1	1	32	32	25	25	17	17	7	7	2	2	2	3	4	4	1	2	0	0	1	4	4	4	0	0	0	0	3
HNRNPA2B1	ENSG00000122566.22	chr7	-	26193710	26195846	IR	TRUE	0.0284272	0.000170944	[129, 391, 130, 131, 401, 102, 144, 347, 477, 543, 385, 138, 142, 399, 145, 410, 156]	[59, 224, 136, 314, 217, 154, 205, 463, 209, 223, 234, 137, 267, 398, 527, 327, 329, 333, 345, 115, 121, 123]	1	0.958904	0.0410959	0.39638	0.0436405	0.909117	0.0826079	0.66039	0.129964	1	12	1	4	0	2	10	26	0	4	0	0	2	2	0	0	0	0	0	2	0	0	0	0	0	0	0	0	0
STAU2	ENSG00000040341.18	chr8	-	73688813	73738283	ES	FALSE	0.0285652	0.000172126	[16, 28, 7, 2, 17, 0, 27, 74, 35, 1, 172, 59, 76, 170, 42, 115, 224, 78, 8, 43, 54, 69, 5, 100, 20, 203, 57, 34, 68, 162, 179, 49, 201, 206, 9, 141, 144, 182, 233, 301, 52, 149, 171, 215, 234, 341, 436, 528, 40, 44, 50, 62, 87, 99, 119, 126, 138, 146, 153, 173, 209, 210, 231, 265, 312, 336, 358, 374, 433, 438, 524, 526, 110, 128, 157, 161, 166, 193, 194, 197, 199, 214, 228, 240, 246, 250, 263, 26…	[18, 31, 11, 23, 93, 45, 32, 22, 41, 190, 89, 37, 47, 169, 207, 26, 135, 137, 58, 122, 288, 295, 39, 222, 462, 113, 219, 285, 289, 322, 323, 338, 339, 345, 513, 83, 291, 311, 324, 428, 518, 72, 123, 142, 187, 188, 239, 242, 249, 269, 274, 287, 293, 294, 298, 307, 314, 365, 453, 488, 491, 494, 496, 500, 512, 515, 517, 519, 12, 523, 525, 15, 529, 530, 532, 531, 21, 533, 48, 55, 56, 65, 75, 88, 91, …	0.0388485	0.0364964	0.00235217	0.313527	0.0137902	0.186197	0.00184203	0.252829	0.0105943	46	177	38	150	95	305	58	204	78	309	28	260	24	151	14	33	36	78	18	24	5	29	1	11	2	3	0	2	6
MYL4	ENSG00000198336.9	chr17	+	47223057	47223495	IR	TRUE	0.0286203	0.000172812	[13, 11, 37, 40, 12, 41, 38, 39, 42, 49, 22]	[7, 15, 30, 5, 29, 16, 48, 50, 20, 23, 51]	0.194805	0.677419	0.482614	0.201787	0.0189039	0.922209	0.00081824	0.374208	0.0776591	0	0	0	0	0	0	0	0	0	0	0	0	0	0	0	0	0	1	1	4	0	0	1	14	0	1	0	15	2
PACRGL	ENSG00000163138.19	chr4	+	20752564	20754821	ALJ	TRUE	0.0287649	0.00017404	[5, 10, 33, 1, 89, 24, 12, 86, 36, 8, 25, 30, 39, 44, 92, 102, 145, 20, 31, 98, 132, 137, 178, 277, 64, 74, 83, 90, 100, 121, 123, 130, 135, 175, 3, 6, 23, 26, 34, 46, 77, 109, 120, 138, 142, 212, 228, 19, 38, 56, 66, 72, 82, 94, 110, 122, 125, 129, 143, 148, 150, 151, 152, 156, 157, 158, 174, 179, 188, 195, 215, 236, 245, 259, 264, 268, 280, 0, 2, 4, 7, 9, 11, 13, 14, 15, 16, 17, 21, 22, 28, 29,…	[37, 18, 139, 47, 67, 73, 101, 153, 163, 68, 222, 240, 114, 169, 295, 177, 191, 207, 225, 234, 107, 124, 128, 257, 258, 265, 279, 27, 161, 289, 290, 292, 293, 294, 41, 43, 302, 54, 57, 59, 60, 62, 65, 194, 70, 199, 200, 75, 204, 206, 80, 208, 211, 85, 214, 88, 216, 217, 219, 223, 96, 104, 237, 116, 249, 251]	0.532348	0.982906	0.450558	0.239181	0.00657034	0.0915441	4.14834e-06	0.171559	0.00779366	5	21	13	25	8	41	6	39	3	12	3	16	5	25	4	6	0	1	0	9	0	3	1	5	0	0	0	1	2
SPTBN1	ENSG00000115306.16	chr2	+	54649037	54649190	AFJ	TRUE	0.0291849	0.000176942	[1, 4, 52, 9, 45, 6, 53, 2, 14, 11, 24, 48, 13, 22, 85, 51, 61, 44, 101, 8, 28, 117, 15, 38, 75, 76, 107, 139, 10, 16, 37, 23, 41, 104, 32, 86, 137, 146, 147, 7, 36, 62, 63, 64, 71, 100, 102, 108, 115, 116, 125, 129, 135, 142, 0, 5, 12, 17, 18, 19, 20, 21, 25, 26, 27, 29, 30, 31, 33, 34, 35, 40, 42, 43, 46, 47, 50, 55, 56, 57, 58, 60, 65, 66, 67, 68, 69, 70, 72, 73, 77, 78, 79, 80, 81, 82, 83, 84…	[3, 49, 122]	0.606866	1	0.393134	0.0205488	5.70582e-07	0.1338	0.0271846	0.0729567	0.00969678	0	11	1	46	0	33	1	20	0	5	0	5	0	11	0	4	0	1	0	3	0	1	0	5	0	6	0	2	0
IG_locus_0	IG_locus_0	KI270846.1	-	323986	529913	ME	TRUE	0.0299242	0.000181793	[2105, 2160, 2104, 2162, 2163, 2107, 2106, 2161, 2114, 2116, 2166, 2181, 2182, 2170, 2060, 2074, 2079, 5298, 5428, 2110, 2111, 2118, 2138, 4068, 5763, 2180, 2184, 2185, 2187, 2189, 2190, 2192, 5649, 2066, 2193, 2195, 2197, 2201, 2329, 2077, 2205, 6176, 2112, 2113, 2115, 2120, 2127, 2129, 2134, 2137, 2144, 2146, 2147, 2149, 2150, 2152, 2153, 2154, 5353, 2156, 4076, 2164, 6132, 4211, 2168, 2171, 81…	[2487, 2470, 2929, 2488, 2471, 2489, 2475, 2989, 3092, 5350, 2944, 2951, 2477, 468, 474, 507, 5025, 2497, 464, 3161, 1131, 3217, 3233, 3246, 5740, 249, 478, 2562, 527, 2599, 6808, 6813, 6849, 6945, 907, 3002, 3003, 3021, 1090, 5305, 5646, 3639, 3741, 3752, 3761, 3767, 6139, 6145, 6150, 6154, 6159, 6163, 6168, 6173, 4218, 4222, 4233, 6320, 221, 285, 2348, 2349, 307, 2443, 2474, 2481, 2483, 2484, 2…	0.960489	0.939417	0.0210717	0.81318	0.134227	0.915827	0.00412596	0.823478	0.100041	1	1	0	8	0	3496	3	4	882	882	5	5	211	211	15	15	1	1	18	19	7	7	4	4	0	0	0	0	3
MALAT1	ENSG00000251562.8	chr11	+	65501581	65503627	ALJ	TRUE	0.0302073	0.000183886	[0, 2, 11, 22, 63, 80, 34, 69, 81, 18, 47, 65, 77, 68, 9, 52, 57, 106, 127, 173, 25, 108, 162, 48, 55, 98, 107, 156, 1, 4, 10, 16, 17, 58, 67, 72, 73, 82, 83, 87, 94, 99, 101, 112, 118, 121, 128, 133, 137, 139, 155, 182, 3, 6, 13, 14, 15, 19, 23, 24, 31, 32, 33, 38, 39, 41, 42, 43, 44, 45, 46, 49, 50, 51, 53, 54, 59, 60, 61, 62, 66, 70, 71, 75, 76, 78, 79, 84, 85, 86, 88, 89, 90, 91, 92, 93, 95, …	[8, 20, 12, 27, 21, 56, 30, 96, 102, 40, 36, 37, 186, 26, 28, 29]	1	1	0	0.0537006	0.00672448	0		0.0288652	0.00420458	2	32	0	53	11	121	14	110	0	17	2	13	0	39	0	16	2	11	1	25	0	52	2	45	0	554	0	9	1
ARFGAP3	ENSG00000242247.11	chr22	-	42826999	42829479	5AS	TRUE	0.0303821	0.000185325	[142, 140, 170, 210, 233, 237, 238, 310, 311]	[27, 17, 100, 76, 65, 153, 164, 79, 66, 107, 240, 272, 145, 284, 295, 298, 301, 62, 203, 244, 124, 132, 139, 268, 143, 159, 163, 39, 167, 173, 174, 176, 175, 304, 50, 53, 77, 93, 121, 232, 234, 241, 242, 246, 249, 254, 318, 321]	0.807692	1	0.192308	0.85408	0.00233195	0.866681	0.115537	0.876219	0.028957	2	2	7	9	14	16	6	8	6	8	12	14	3	3	4	4	0	0	0	0	1	1	22	29	0	0	1	1	1
HIF1A	ENSG00000100644.17	chr14	+	61740627	61744704	3AS	TRUE	0.0305647	0.000187147	[200, 183, 187, 39, 140, 877, 846, 593, 1250]	[44, 181, 204, 264, 80, 141, 363, 800, 818, 341, 353, 111, 836, 370, 764, 389, 914, 147, 32, 695, 747, 109, 639, 172, 1064, 1067, 434, 964, 981, 728, 756, 1017, 762, 907, 908, 924, 1053, 672, 804, 42, 690, 949, 828, 958, 838, 1098, 860, 734, 735, 736, 864, 990, 741, 358, 743, 1009, 500, 374, 1013, 1144, 124]	1	0.988981	0.0110193	0.969808	0.000212914	0.658186	0.046294	0.867293	0.027159	0	0	4	4	17	17	4	4	21	22	1	1	2	2	0	0	5	5	13	13	25	26	125	126	0	0	4	4	21
GCLC	ENSG00000001084.13	chr6	-	53516222	53520777	3AS	FALSE	0.0305647	0.000187419	[0, 53, 52, 28, 15, 25, 41, 13, 17, 56, 5, 32, 36, 37, 61, 69, 94, 3, 16, 18, 30, 35, 40, 42, 51, 55, 62, 63, 66, 67, 70, 71, 80, 87]	[4, 68, 85, 93, 95]	0.0257235	0	0.0257235	0.114902	0.0119031	0.00330295	3.38365e-05	0.0617751	0.0113607	3	13	1	27	0	26	0	8	0	7	0	9	0	9	0	8	0	1	2	2	0	3	1	31	0	0	1	9	1
RNF146	ENSG00000118518.16	chr6	+	127280340	127280515	3AS	TRUE	0.0305647	0.000187572	[5, 23, 10, 16, 26, 41, 36, 32, 44, 92, 33, 27, 42, 64, 25, 46, 49, 63, 39, 51, 55, 59, 60, 62, 65, 70, 71, 73, 75, 76, 78, 80, 84, 85, 86, 91, 93, 94, 96, 98, 101]	[68, 83, 74, 31, 97, 66, 67, 79, 99, 100, 88, 89, 95]	0.666667	0.945946	0.279279	0.188987	0.0165315	0.0348384	0.0145854	0.102302	0.0206129	1	8	3	15	5	34	2	12	1	14	2	19	0	21	0	0	9	14	0	8	3	10	0	2	0	0	0	2	1
CELF2	ENSG00000048740.18	chr10	+	11314258	11321206	3AS	FALSE	0.0306048	0.000188195	[1, 38, 142, 3, 13, 127, 93, 102, 138, 247, 48, 156, 114, 174, 192, 163, 229, 89, 125, 140, 290, 19, 40, 222, 80, 151, 204, 212, 312, 361, 26, 570, 593, 111, 116, 158, 255, 261, 300, 386, 408, 515, 39, 57, 573, 70, 134, 208, 236, 282, 294, 298, 338, 376, 394, 451, 5, 527, 530, 536, 549, 43, 558, 50, 59, 579, 71, 590, 82, 597, 598, 123, 124, 130, 139, 171, 185, 196, 215, 230, 274, 277, 283, 309, 3…	[20, 144, 8, 170, 45, 145, 318, 428, 166, 353, 52, 190, 341, 364, 250, 528, 557, 303, 187, 572, 349, 476, 355, 497, 500, 512, 517, 518, 133, 390, 392, 395, 411, 29, 545, 417, 548, 550, 552, 423, 53, 181, 74, 334, 469, 220, 607, 480, 97, 365, 621, 237, 624, 373, 635, 638, 383]	0.190411	0.125	0.065411	0.201361	0.00370389	0.123201	4.36977e-05	0.162868	0.00354296	16	85	31	146	78	329	79	340	26	119	16	108	39	178	11	45	6	22	28	67	10	56	15	72	0	0	6	11	5
CREBZF	ENSG00000137504.14	chr11	-	85663277	85663523	3AS	TRUE	0.0307395	0.000189403	[25, 47, 11, 46, 52, 53, 24, 58]	[13, 10, 2, 3, 16, 4, 36, 22, 37, 34, 38, 40, 50, 59, 29]	1	1	0	0.795636	6.10454e-05	1		0.900085	0.0275412	0	0	8	10	7	7	37	47	0	0	0	0	10	10	0	0	0	1	0	0	1	1	1	2	0	0	0	0	0
SLTM	ENSG00000137776.17	chr15	-	58899883	58901259	3AS	FALSE	0.0316081	0.000195145	[0, 97, 4, 66, 25, 77, 26, 49, 189, 54, 246, 225, 275, 482, 92, 343, 400, 10, 113, 378, 236, 483, 409, 519, 524, 1137, 665, 390, 551, 60, 199, 737, 32, 574, 128, 138, 171, 724, 300, 457, 480, 1068, 51, 70, 615, 125, 656, 159, 674, 183, 732, 742, 244, 784, 821, 337, 1375, 896, 402, 964, 972, 511, 1024, 522, 1030, 539, 542, 543, 552, 557, 1072, 1079, 1082, 67, 75, 589, 1102, 594, 1103, 613, 614, 63…	[1, 3, 2, 13, 14, 19, 9, 21, 58, 76, 160, 12, 344, 399, 11, 83, 345, 101, 57, 16, 84, 37, 248, 80, 366, 459, 174, 617, 230, 481, 62, 88, 446, 206, 249, 329, 334, 326, 363, 502, 751, 42, 188, 245, 534, 548, 862, 46, 118, 120, 124, 180, 218, 252, 291, 293, 353, 209, 253, 319, 341, 413, 443, 929, 1136, 1139, 35, 238, 254, 295, 349, 359, 464, 559, 598, 924, 932, 950, 85, 115, 165, 202, 282, 321, 370,…	0.193452	0.170768	0.0226846	0.787498	0.005992	0.670855	0.00515696	0.733853	0.00915025	235	322	499	652	564	808	291	386	133	200	100	167	223	311	61	79	36	42	28	29	37	43	90	101	2	2	10	10	27
NT5C3A	ENSG00000122643.22	chr7	-	33015887	33017438	IR	TRUE	0.0316082	0.000195536	[184, 191, 268, 46, 258, 237, 160, 161, 294, 295, 50, 51, 179, 274, 24]	[10, 3, 7, 8, 30, 56, 38, 48, 49, 42, 138, 36, 14, 52, 31, 104, 117, 136, 39, 54, 55, 58, 89, 101, 107, 108, 121, 158, 6, 21, 22, 28, 45, 57, 59, 72, 76, 94, 113, 126, 153, 169, 182, 206, 209, 9, 11, 18, 20, 41, 43, 53, 63, 77, 97, 114, 116, 129, 140, 143, 151, 154, 171, 175, 189, 215, 217, 218, 231, 255, 256, 264, 265, 269, 277, 301, 303, 306, 309, 313, 315, 316, 317, 318]	1	0.633634	0.366366	0.8622	0.0316408	0.958387	0.0398616	0.920871	0.0235099	19	24	68	68	15	16	24	25	20	21	20	20	30	30	13	13	2	2	4	5	2	3	5	5	3	5	1	1	9
ARHGAP25	ENSG00000163219.12	chr2	+	68787956	68807275	3AS	FALSE	0.0318007	0.00019712	[13, 102, 39, 40, 27, 84, 45, 331, 101, 269, 431, 226, 421, 36, 92, 239, 252, 360, 392, 245, 273, 310, 30, 143, 660, 702, 234, 264, 278, 801, 309, 350, 514, 527, 64, 580, 582, 583, 88, 600, 99, 185, 772, 776, 332, 342, 354, 905, 906, 925, 441, 972, 493, 534, 543, 554, 578, 70, 585, 588, 77, 621, 636, 656, 169, 178, 693, 209, 723, 282, 300, 304, 307, 823, 317, 837, 844, 849, 858, 860, 355, 869, 36…	[11, 24, 12, 23, 32, 19, 15, 248, 46, 51, 133, 231, 33, 106, 104, 124, 116, 144, 28, 66, 166, 67, 16, 189, 65, 58, 433, 20, 103, 155, 175, 498, 251, 131, 266, 75, 181, 197, 54, 50, 142, 9, 171, 196, 10, 105, 167, 497, 176, 87, 86, 98, 227, 237, 268, 299, 115, 179, 375, 613, 5, 62, 132, 186, 200, 550, 672, 173, 188, 205, 246, 250, 513, 630, 740, 59, 83, 139, 438, 548, 673, 709, 780, 1, 57, 160, 25…	0.238221	0.299618	0.0613962	0.887617	0.000593588	0.858127	2.56607e-06	0.87112	0.00049781	296	329	1090	1228	2304	2693	1705	1872	415	460	353	415	1542	1807	188	219	35	38	97	107	90	110	50	53	0	0	28	31	36
STAT4	ENSG00000138378.19	chr2	-	191058219	191058709	IR	TRUE	0.0325315	0.000202052	[0, 5, 11, 62, 24, 87, 63, 122, 170, 159, 1, 26, 3, 13, 60, 80, 90, 111, 118, 16, 25, 28, 35, 36, 43, 45, 46, 47, 49, 56, 57, 66, 92, 115, 139, 144, 152, 153, 157, 161, 162, 169, 183, 188, 199, 209, 213, 7, 8, 10, 14, 29, 31, 38, 40, 50, 51, 52, 53, 61, 64, 70, 72, 73, 74, 75, 83, 84, 85, 86, 88, 89, 91, 93, 99, 100, 101, 103, 104, 110, 116, 117, 120, 123, 124, 125, 126, 127, 130, 133, 134, 138, …	[4, 12, 21, 33, 23, 39, 32, 42, 146, 196, 34, 37, 94, 171, 172, 181, 200, 204, 210, 215, 242, 9, 15, 20, 27, 30, 41, 44, 48, 54, 58, 59, 65, 67, 68, 69, 71, 76, 82, 96, 97, 98, 102, 105, 108, 109, 112, 113, 114, 119, 121, 128, 129, 131, 132, 137, 140, 148, 154, 155, 156, 158, 164, 165, 166, 168, 174, 176, 182, 186, 192, 194, 195, 197, 198, 201, 208, 212, 214, 218, 219, 220, 232, 237, 243, 251, 25…	0.330078	1	0.669922	0.29742	2.28479e-05	0.107369	0.0212525	0.206295	0.0184131	0	0	12	30	0	0	35	99	0	0	7	21	0	0	0	0	3	16	2	2	14	61	5	21	0	0	0	2	6
CTNNAL1	ENSG00000119326.15	chr9	-	108979481	108983144	3AS	TRUE	0.0329285	0.000204924	[0, 6, 5, 4, 16, 1, 13, 61, 32, 35, 12, 11, 62, 64, 2, 7, 50, 60, 75, 3, 23, 63, 79, 108, 115, 121, 15, 42, 48, 51, 65, 69, 70, 72, 78, 83, 97, 98, 116, 126, 141, 149, 164, 169, 190, 192, 193, 8, 9, 14, 19, 25, 30, 31, 34, 37, 40, 44, 45, 46, 52, 53, 54, 55, 56, 57, 58, 59, 66, 68, 71, 73, 74, 76, 82, 84, 85, 93, 95, 105, 106, 110, 112, 117, 123, 124, 125, 127, 128, 129, 133, 136, 137, 138, 139, …	[18, 41, 91, 118, 154, 167, 94, 143, 181, 186, 197, 102, 114, 134, 135, 144, 145, 147, 21, 22, 28, 29, 159, 39, 171, 179, 180, 182, 187, 188, 67, 195, 196, 198, 200, 202, 204, 206, 89, 96, 99, 100, 101, 103, 104, 107, 109, 113]	0.138147	0.990566	0.852419	0.0709455	0.0025763	0.00754005	4.09153e-05	0.0411273	0.00239855	0	2	0	6	0	1	4	27	0	1	0	0	0	1	0	2	4	25	1	48	3	21	24	114	0	2	2	45	1
CDC7	ENSG00000097046.13	chr1	+	91501303	91501636	IR	TRUE	0.0332212	0.000207155	[57, 175, 297, 125, 295, 77, 301, 283]	[5, 7, 20, 21, 25, 99, 16, 164, 58, 28, 172, 176, 72, 14, 29, 162, 42, 84, 91, 138, 146, 153, 160, 34, 182, 71, 93, 94, 96, 256, 12, 277, 151, 154, 156, 155, 33, 36, 163, 296, 41, 180, 183, 184, 185, 197, 199, 81, 211, 98, 100, 227, 235, 236, 304]	0.0810811	1	0.918919	0.878374	0.0179599	0.996943	6.27779e-08	0.93895	0.0125132	21	23	22	22	23	23	18	18	12	12	9	9	7	7	2	2	1	1	2	2	1	1	4	4	0	0	0	0	5
COBLL1	ENSG00000082438.17	chr2	-	164703220	164704443	3AS	TRUE	0.0333017	0.000208069	[15, 32, 211, 161, 145, 281, 332, 86, 117, 132, 262, 137, 277, 280, 165, 180, 308, 309, 187, 59, 323, 206, 80, 354, 105, 114, 385, 363, 366, 369, 376, 379, 383]	[79, 256, 229, 260, 292, 225, 343, 237, 131, 307, 314, 315, 316, 344, 345, 346, 220, 350, 227, 357]	0.107143	0.142857	0.0357143	0.677713	0.063314	0.0403339	0.000101357	0.363842	0.134612	20	23	1	1	30	48	6	6	10	17	0	1	0	0	0	0	0	0	0	0	0	0	4	5	0	0	0	0	0
MYL4	ENSG00000198336.9	chr17	+	47223508	47223676	ALJ	TRUE	0.0335249	0.000209993	[13, 7, 15, 11, 37, 9, 12, 40, 3, 30, 32, 5, 19, 29, 41, 44, 1, 4, 6, 14, 16, 17, 20, 22, 23, 25, 27, 28, 31, 38, 39, 42, 47, 48, 49, 50, 51]	[2, 0, 8, 21, 18, 34, 33, 35, 36, 10, 43, 45, 46, 24, 26]	0.325758	0.0963855	0.229372	0.44579	0.00095124	0.759089	0.0176114	0.569888	0.0341458	0	0	0	0	0	0	0	0	0	0	0	0	0	0	0	0	0	1	1	5	2	2	6	22	0	2	17	35	13
SRSF4	ENSG00000116350.17	chr1	-	29160517	29165889	3AS	TRUE	0.0335249	0.000210291	[19, 37, 83, 11, 13, 82, 92, 38, 58, 69, 112, 75, 76, 172, 65, 197, 26, 155, 175, 100, 121, 138, 153, 169, 171, 183, 186, 61, 207, 93, 99, 108, 110, 118, 135, 139, 140, 146, 148, 28, 31, 168, 173, 47, 185, 188, 63, 192, 72, 208, 209, 94, 102, 113, 127]	[8, 32, 27, 22, 96, 51, 95, 15, 154, 132, 152, 144, 39, 212, 117, 131, 4, 157, 167, 49, 52, 54, 57, 187, 60, 189, 62, 73, 202, 206, 81, 85, 213, 90]	0.995157	1	0.00484262	0.328093	0.00488636	0.12211	0.0079352	0.231935	0.0212607	4	6	4	16	13	31	7	19	2	5	2	4	2	15	0	2	0	0	4	6	3	5	8	23	0	0	0	1	1
GABPA	ENSG00000154727.11	chr21	+	25735070	25741572	3AS	TRUE	0.0335944	0.000213631	[0, 17, 19, 1, 50, 51, 2, 10, 20, 21, 64, 88, 100, 107, 109, 117, 122, 123, 124]	[18, 55, 126, 121, 127]	0.0669975	0.111111	0.0441136	0.112407	0.000103702	0.00793916	8.80833e-07	0.0810195	0.00210059	2	6	0	7	0	4	0	3	0	2	1	9	0	0	0	0	0	2	0	0	0	3	0	8	0	0	1	2	1
MRPS9	ENSG00000135972.9	chr2	+	105097324	105099648	IR	TRUE	0.0335944	0.00021359	[8, 52, 86, 151, 87, 167, 158]	[3, 21, 7, 44, 37, 24, 36, 56, 76, 6, 45, 53, 89, 134, 15, 20, 42, 48, 90, 92, 100, 23, 156, 31, 55, 88, 95, 97, 98, 99, 106, 110, 119, 127]	0.33871	0.578723	0.240014	0.492173	0.156056	0.974972	1.49193e-06	0.702876	0.141289	2	9	35	35	17	23	10	14	2	7	36	36	5	5	0	0	0	0	0	2	0	0	0	0	0	12	0	0	0
ENTPD1	ENSG00000138185.20	chr10	+	95876528	95877259	ALJ	TRUE	0.0335944	0.000213408	[3, 2, 6, 458, 55, 44, 30, 89, 12, 94, 40, 47, 1, 490, 15, 72, 27, 8, 32, 179, 57, 77, 19, 41, 475, 56, 70, 99, 214, 498, 143, 100, 150, 474, 45, 103, 127, 14, 457, 473, 9, 83, 159, 115, 131, 145, 469, 23, 24, 10, 62, 134, 234, 251, 471, 4, 34, 61, 116, 186, 230, 269, 413, 499, 35, 52, 109, 114, 140, 149, 210, 217, 248, 277, 344, 463, 81, 96, 124, 177, 267, 275, 513, 13, 25, 46, 107, 135, 171, 19…	[11, 494, 38, 65, 91, 120, 122, 183, 125, 419, 141, 355, 36, 574, 118, 293, 312, 354, 365, 459, 22, 75, 92, 111, 189, 223, 229, 278, 284, 301, 309, 339, 496, 512, 518, 43, 80, 112, 631, 128, 136, 657, 198, 283, 356, 373, 390, 5, 7, 530, 537, 31, 544, 546, 547, 549, 551, 552, 554, 48, 562, 566, 64, 580, 69, 73, 586, 589, 592, 593, 596, 87, 622, 623, 625, 626, 627, 633, 634, 635, 640, 641, 137, 651…	0.401791	0.604255	0.202465	0.113397	0.00225784	0.0600159	3.93327e-05	0.0877519	0.00143273	20	234	19	314	36	486	17	124	17	229	5	92	37	307	10	102	2	40	14	59	12	66	1	19	0	6	1	14	16
SEC31A	ENSG00000138674.17	chr4	-	82891087	82891203	AFJ	FALSE	0.0335944	0.000211338	[13, 265, 71, 387, 315, 44, 129, 201, 121, 142, 259, 332, 64, 339, 298, 113, 349, 76, 345, 457, 467, 125, 210, 267, 324, 379, 115, 175, 198, 253, 351, 475, 854, 61, 94, 153, 233, 239, 440, 581, 603, 639, 842, 40, 42, 122, 228, 286, 391, 413, 462, 523, 578, 718, 856, 880, 889, 992, 1035, 9, 161, 386, 430, 439, 442, 521, 556, 647, 863, 881, 990, 1019, 150, 159, 177, 241, 248, 270, 273, 312, 380, 41…	[4, 0, 5, 1, 2, 27, 47, 6, 3, 35, 50, 21, 31, 39, 109, 26, 22, 25, 32, 487, 105, 15, 55, 34, 41, 217, 182, 72, 133, 124, 406, 58, 117, 485, 92, 465, 36, 53, 90, 193, 496, 226, 59, 79, 101, 110, 43, 89, 131, 170, 73, 123, 7, 86, 225, 456, 33, 74, 304, 366, 45, 57, 97, 365, 428, 544, 995, 20, 102, 119, 202, 237, 522, 644, 756, 848, 157, 257, 336, 342, 382, 474, 508, 526, 534, 553, 560, 736, 788, 84…	0.203104	0.102904	0.1002	0.850429	0.005765	0.684046	0.0740169	0.758076	0.0404222	195	207	578	644	748	854	321	412	123	133	218	243	232	287	64	73	39	40	28	34	60	63	74	90	0	0	6	7	17
MMS19	ENSG00000155229.21	chr10	-	97459475	97459658	IR	TRUE	0.0335944	0.000212592	[78, 94, 325, 162, 183, 737, 774, 791, 783, 170, 766, 132, 781, 788, 674, 181, 71, 77, 734, 740, 364, 763, 391, 778, 395, 396, 397, 782, 147, 787, 533, 151, 800, 418, 422, 808, 428, 816, 435, 187, 318, 446, 198, 201, 459, 207, 208, 463, 218, 219, 732, 478, 98, 738, 864, 743, 108, 748, 751, 113, 882, 757, 121, 378, 892, 893]	[529, 530, 661, 340, 382, 527, 532, 544, 39, 426, 686, 456, 635, 387, 518, 264, 269, 405, 666, 669, 157, 414, 416, 286, 291, 680, 557, 430, 690, 563, 308, 566, 567, 57, 447, 197, 581, 839, 712, 591, 727, 472, 474, 230, 874, 876, 237, 239, 880, 632, 124, 383, 901, 902]	0.486486	0.957143	0.470656	0.119028	0.00903904	0.696584	0.0481329	0.397179	0.115272	0	0	0	16	0	7	1	41	0	0	0	0	0	5	0	0	0	0	0	2	0	0	0	0	0	0	0	0	1
NOL9	ENSG00000162408.11	chr1	-	6545180	6549570	ES	TRUE	0.0335944	0.000212265	[8, 14, 28, 53, 67, 2, 3, 71, 101, 15, 27, 18, 68, 16, 23, 34, 73, 97, 100, 1, 7, 13, 22, 24, 33, 40, 42, 43, 44, 45, 47, 48, 51, 52, 59, 60, 61, 62, 79, 80, 81, 84, 85, 91, 92, 93, 99, 102, 104, 105, 109, 113, 117, 118]	[10, 31, 106, 39, 107, 21]	0.419708	0.193548	0.22616	0.172501	0.000767096	0.0101121	0.000580217	0.0856321	0.012646	0	1	1	2	0	8	0	1	3	9	0	1	0	6	0	0	0	0	1	2	1	2	1	2	0	0	0	0	0
BCL2L1	ENSG00000171552.14	chr20	-	31722330	31723734	3AS	FALSE	0.0335944	0.000212847	[11, 45, 46, 138, 64, 51]	[20, 65, 66, 37, 34, 139, 142, 47, 148, 118, 87, 63]	0.15625	0.0879121	0.0683379	0.784159	0.0174321	0.254108	0.00534539	0.526867	0.0771044	0	0	0	0	0	0	0	0	0	0	0	0	1	2	0	0	0	0	12	12	0	0	4	6	0	0	20	26	0
GDAP1	ENSG00000104381.14	chr8	+	74350578	74360136	ES	FALSE	0.0339105	0.00021606	[11, 7, 44, 15, 41, 48, 50, 52]	[0, 1, 20, 23, 22, 8, 3, 9, 18, 2, 10, 25, 26, 30, 31, 33, 34, 36, 38, 43, 45, 47, 51, 53, 54]	1	0.353902	0.646098	0.734794	0.0746278	0.916626	2.63981e-06	0.84959	0.0185552	30	30	34	35	37	46	25	28	30	34	13	13	22	27	11	13	2	2	0	0	0	2	1	3	0	0	0	3	1
EIF2S3	ENSG00000130741.11	chrX	+	24073263	24074337	IR	TRUE	0.0340703	0.000217498	[40, 353, 366, 316, 482, 473, 186]	[24, 207, 228, 10, 367, 249, 129, 345, 349, 243, 135, 161, 54, 57, 314, 320, 352, 101, 107, 242, 384, 391, 398, 147, 148, 157, 293, 298, 171, 303, 434, 182, 310, 311, 189, 65, 67, 73, 85, 88, 90, 237, 369, 376]	0.0404624	1	0.959538	0.409125	0.113476	0.857159	0.122428	0.608435	0.15554	2	5	4	4	6	7	4	25	7	14	2	2	8	8	0	1	1	1	0	7	1	7	0	9	0	0	0	0	0
SUPT16H	ENSG00000092201.10	chr14	-	21357380	21357926	IR	TRUE	0.0345415	0.000220933	[36, 90, 299, 285, 308, 356, 297, 368, 118, 379, 384, 385, 401, 402, 281, 286, 291, 302, 305, 110, 125, 378, 381]	[77, 82, 201, 141, 128, 130, 70, 103, 122, 267, 366, 144, 148, 250, 383, 405]	1	1	0	0.136608	0.00656942	0.664361	0.108592	0.372339	0.102109	2	17	0	9	0	26	1	10	2	6	0	1	1	1	0	1	0	1	1	3	0	0	0	3	0	0	0	0	0
PHTF2	ENSG00000006576.16	chr7	+	77798971	77893607	3AS	TRUE	0.0348815	0.000223539	[41, 127, 163, 256, 72, 287, 264, 113, 177, 379, 341, 217, 315, 189]	[51, 54, 76, 82, 81, 75, 50, 314, 42, 55, 313, 270, 274, 319, 339, 375, 384, 260, 269, 273, 59, 316, 317, 65, 66, 71, 201, 333, 335, 338, 85, 220, 367, 370, 374, 393]	1	1	0	0.891664	0.000587277	0.426791	0.003171	0.696012	0.0503982	14	14	12	15	8	10	32	34	15	16	0	0	0	1	0	0	1	1	0	1	3	3	2	2	0	0	0	0	0
POC1B	ENSG00000139323.14	chr12	-	89492115	89525119	ES	FALSE	0.0349515	0.000224419	[9, 5, 11, 24, 31, 49, 43, 109, 45, 301, 106, 38, 6, 30, 174, 0, 14, 26, 97, 147, 156, 168, 129, 159, 162, 44, 46, 48, 124, 258, 57, 88, 145, 181, 340, 400, 16, 21, 32, 56, 94, 117, 132, 135, 161, 166, 175, 255, 265, 299, 322, 336, 352, 359, 42, 51, 100, 123, 130, 137, 142, 203, 212, 215, 230, 232, 241, 269, 273, 275, 284, 286, 342, 347, 363, 419, 429, 25, 52, 55, 64, 65, 72, 75, 85, 86, 87, 98, …	[1, 3, 10, 13, 7, 12, 58, 50, 69, 27, 89, 160, 39, 41, 150, 177, 338, 139, 4, 63, 73, 96, 211, 34, 66, 128, 141, 190, 202, 349, 28, 67, 79, 173, 33, 93, 146, 151, 152, 154, 171, 176, 208, 229, 237, 354, 15, 53, 136, 138, 144, 157, 169, 170, 178, 182, 195, 197, 201, 205, 219, 235, 236, 238, 244, 249, 262, 280, 302, 308, 320, 334, 361, 375, 401, 411, 435, 17, 29, 35, 37, 47, 54, 59, 60, 62, 68, 70,…	0.844122	0.10217	0.741952	0.566251	0.00317627	0.486898	0.0288441	0.53127	0.0151795	66	128	81	138	94	189	67	116	65	135	39	76	71	150	25	51	23	37	23	40	35	81	44	83	0	0	27	50	52
LINC01138	ENSG00000274020.4	chr1	-	148432959	148435354	ALJ	TRUE	0.0349996	0.00022516	[11, 15, 0, 25, 33, 32, 8, 10, 54, 26, 28, 40, 43, 48, 59, 70, 6, 9, 21, 37, 46, 63, 1, 4, 5, 14, 16, 17, 18, 20, 23, 27, 29, 30, 31, 34, 35, 36, 38, 39, 41, 42, 44, 45, 47, 49, 50, 51, 52, 53, 55, 56, 57, 60, 61, 62, 64, 66, 68, 69, 71, 72, 73, 74, 75]	[7, 19, 76]	0.99422	1	0.00578035	0.050531	0.00422314	0.288821	0.000132223	0.143634	0.0179581	0	1	0	11	0	6	0	9	0	2	0	4	0	8	0	10	0	0	0	4	0	4	0	0	0	2	0	3	0
FCRL1	ENSG00000163534.15	chr1	-	157792312	157796170	ALJ	TRUE	0.0353821	0.000228058	[142, 143, 220, 411, 203, 64, 37, 109, 273, 1225, 337, 360, 765, 766, 1224, 1235, 213, 355, 356, 361, 767, 779, 904, 1221, 1228, 1229, 1233, 1234, 1255, 1261, 1274, 1287, 22, 84, 145, 195, 354, 358, 479, 492, 554, 557, 561, 669, 672, 674, 684, 736, 760, 862, 1047, 1049, 1060, 1065, 1166, 1168, 1223, 1227, 1236, 1269, 1278, 1280, 1281, 1314, 1315, 1350, 1356, 1368, 1371, 0, 24, 68, 104, 144, 146, …	[8, 18, 45, 32, 62, 4, 77, 21, 14, 26, 23, 65, 43, 30, 185, 44, 262, 53, 134, 106, 36, 247, 29, 56, 34, 221, 174, 15, 158, 78, 51, 72, 70, 160, 239, 60, 71, 75, 149, 93, 6, 1, 283, 35, 46, 286, 330, 120, 166, 3, 31, 171, 188, 210, 63, 108, 118, 50, 317, 497, 82, 111, 99, 112, 141, 150, 179, 334, 381, 12, 154, 167, 409, 420, 165, 207, 318, 5, 170, 190, 242, 430, 515, 524, 604, 49, 67, 116, 161, 24…	0.322287	0.392308	0.0700218	0.790963	0.0038746	0.907623	0.000917416	0.859062	0.00525954	74	95	287	336	447	530	352	523	142	180	104	137	175	200	52	77	0	0	0	0	11	13	0	0	0	0	0	0	2
LAX1	ENSG00000122188.13	chr1	+	203765383	203765516	IR	TRUE	0.0357537	0.000230894	[6, 13, 25, 3, 36, 53, 10, 26, 55, 129, 28, 70, 72, 81, 83, 88, 90, 92, 100, 102, 118, 125, 127, 130]	[4, 11, 7, 17, 5, 24, 0, 22, 34, 27, 23, 20, 64, 56, 121, 16, 49, 67, 77, 8, 37, 57, 58, 59, 105, 106, 128, 21, 33, 40, 41, 42, 44, 45, 46, 47, 51, 52, 54, 66, 68, 74, 75, 80, 84, 86, 87, 91, 94, 99, 103, 108, 110, 113, 116, 117, 119, 120, 122, 123]	0.10101	0.172159	0.0711486	0.64068	0.0163583	0.866617	0.000551193	0.745529	0.0197856	15	25	71	120	52	83	86	149	34	42	8	11	40	50	7	8	0	0	0	0	2	2	0	0	0	0	0	1	0
AK9	ENSG00000155085.15	chr6	-	109610513	109612009	3AS	TRUE	0.0364692	0.000235965	[14, 11, 12, 65, 64, 52, 117, 10, 49, 51, 67, 13, 26, 40, 45, 76, 156, 9, 24, 29, 42, 58, 66, 68, 77, 78, 91, 126, 137, 145, 162, 163, 199, 2, 8, 15, 16, 17, 25, 27, 28, 30, 32, 37, 38, 39, 41, 43, 44, 48, 50, 53, 57, 60, 63, 75, 81, 82, 83, 84, 86, 90, 92, 93, 94, 95, 96, 97, 98, 100, 101, 103, 104, 105, 106, 107, 108, 109, 110, 111, 118, 119, 120, 121, 124, 125, 136, 138, 143, 146, 147, 148, 14…	[139, 144, 151, 152, 191, 164, 165, 171, 175, 212, 159]	0.869565	0.933333	0.0637681	0.121027	1.06444e-05	0		0.0582483	0.0103773	0	10	1	8	4	23	4	23	2	17	0	10	1	10	0	6	2	2	0	3	0	2	0	0	0	4	0	0	0
SGO2	ENSG00000163535.18	chr2	+	200526200	200526252	AFJ	TRUE	0.0364985	0.000236605	[6, 0, 5, 20, 4, 49, 10, 11, 58, 30, 17, 29, 45, 70, 76, 15, 16, 18, 19, 21, 26, 31, 32, 33, 46, 47, 52, 54, 61, 64, 65, 68, 69, 71, 74, 80, 81]	[1, 22, 12, 3, 48, 27, 7, 28, 38, 2, 37, 63, 57, 59, 25, 53, 56, 62, 67, 72, 73, 77, 8, 9, 13, 14, 23, 24, 34, 35, 36, 39, 40, 41, 42, 43, 44, 50, 51, 55, 60, 66, 75, 78, 79, 82, 83, 84, 85, 86, 87, 88]	0.195312	0.0689362	0.126376	0.823329	0.045428	0.888855	1.11305e-05	0.861633	0.0181556	9	10	26	26	4	4	13	13	11	11	21	22	11	11	2	2	18	18	11	11	2	2	25	27	14	21	2	5	31
ANLN	ENSG00000011426.11	chr7	+	36420314	36420611	3AS	FALSE	0.0371676	0.000241402	[4, 20, 47, 168, 103, 40, 180, 67, 70, 41, 172, 177, 183, 74, 206, 213, 215, 102, 130, 135, 148, 167, 46, 55, 60, 188, 193, 73, 201, 203, 205, 211, 86, 91, 223, 100, 104, 105, 107, 110, 115, 116, 121]	[1, 0, 3, 2, 11, 25, 17, 76, 16, 19, 29, 33, 36, 56, 9, 18, 31, 192, 43, 75, 126, 143, 12, 37, 62, 99, 119, 146, 6, 7, 22, 23, 48, 51, 52, 65, 71, 81, 95, 111, 137, 144, 145, 158, 166, 171, 175, 182, 200, 5, 8, 10, 13, 14, 15, 21, 24, 26, 27, 28, 30, 34, 35, 38, 39, 44, 45, 49, 50, 53, 57, 58, 59, 61, 63, 64, 66, 68, 69, 72, 77, 78, 79, 80, 82, 83, 84, 85, 87, 88, 89, 90, 93, 94, 96, 97, 98, 101,…	0.153061	0.133239	0.0198224	0.83723	0.000636288	0.948384	0.000598221	0.87466	0.00729118	0	0	0	0	0	0	0	0	0	0	0	0	0	0	0	0	28	31	2	8	0	0	18	26	0	0	3	5	25
ATF7IP	ENSG00000171681.12	chr12	+	14481185	14482346	IR	TRUE	0.0378414	0.000246245	[11, 357, 20, 350, 392, 540, 499, 533, 571, 512, 261, 539, 545, 553, 554, 560, 563, 575, 581, 590, 597, 495, 497, 376, 378]	[189, 287, 268, 175, 185, 212, 121, 399, 541, 229, 496, 116, 10, 286, 314, 67, 325, 351, 260, 15, 145, 404, 279, 156, 421, 433, 562, 184, 570, 574, 71, 79, 593, 479, 109, 365, 111, 115, 123, 605]	0.0726257	0.780952	0.708327	0.253207	0.020549	0.658239	0.0339258	0.407935	0.0594194	5	24	4	13	13	24	4	8	1	7	4	8	4	7	0	2	0	5	0	26	1	2	5	20	0	0	0	0	1
SLC2A3	ENSG00000059804.16	chr12	-	7933147	7936019	3AS	FALSE	0.0379367	0.000247334	[86, 368, 273, 470]	[66, 7, 204, 121, 234, 523, 588, 211, 310, 581, 231, 113, 241, 119, 474, 123]	0.0447761	0.54902	0.504243	0.772539	0.0287099	0.785726	0.168356	0.79418	0.0869592	0	0	0	0	5	6	0	0	4	4	0	0	7	7	0	0	1	1	42	60	4	7	13	37	0	0	1	1	1
MRFAP1L1	ENSG00000178988.11	chr4	-	6708643	6709225	IR	TRUE	0.0379871	0.000248132	[2, 16]	[0, 6, 9, 10, 17]	0	0.0422961	0.0422961	0.901797	0.00486481	0.830108	0.0714845	0.860441	0.0321199	28	29	20	21	32	32	63	64	50	52	47	52	32	33	20	21	1	1	7	7	6	6	10	11	2	2	1	1	5
RALGPS2	ENSG00000116191.17	chr1	+	178725241	178725419	AFJ	TRUE	0.0384653	0.00025173	[7, 102, 105, 219, 133, 387, 108, 135, 35, 103, 107, 188, 216, 106, 215, 19, 331, 384, 171, 173, 195, 281, 350, 621, 21, 99, 104, 218, 305, 332, 382, 386, 515, 605, 175, 176, 279, 282, 365, 379, 380, 381, 383, 407, 433, 603, 620, 16, 34, 46, 60, 69, 100, 101, 109, 132, 134, 139, 161, 167, 170, 172, 174, 194, 207, 217, 230, 246, 276, 277, 278, 280, 309, 320, 323, 328, 329, 330, 385, 388, 392, 396,…	[2, 18, 4, 1, 13, 5, 67, 12, 3, 90, 29, 36, 66, 6, 53, 32, 116, 45, 63, 91, 41, 11, 78, 31, 48, 72, 95, 15, 71, 0, 65, 88, 39, 163, 50, 84, 64, 86, 138, 169, 25, 27, 62, 75, 119, 43, 47, 87, 54, 81, 93, 158, 301, 349, 40, 73, 76, 115, 137, 193, 79, 178, 352, 33, 118, 229, 283, 97, 154, 191, 198, 241, 250, 252, 307, 355, 38, 179, 184, 190, 196, 210, 224, 238, 306, 310, 333, 8, 82, 83, 92, 120, 140…	0.813345	0.286483	0.526862	0.713924	0.0485028	0.869269	0.00223103	0.801115	0.0166779	315	354	486	551	930	1035	373	436	249	312	207	257	183	221	52	62	0	1	4	6	4	8	7	7	0	5	1	1	6
ITPR1	ENSG00000150995.20	chr3	+	4675067	4676179	ALJ	TRUE	0.0386368	0.00025333	[2, 77, 3, 47, 44, 147, 52, 85, 148, 35, 45, 60, 98, 109, 0, 12, 36, 59, 62, 64, 78, 79, 82, 90, 102, 103, 125, 133, 143, 146, 149, 150, 152, 160, 162, 163, 165]	[1, 18, 30, 53, 63, 81, 119, 116, 99, 100, 112, 151, 54, 73, 75, 80, 84, 117, 136, 137, 138, 139, 140, 13, 14, 141, 153, 27, 32, 37, 43, 61, 74, 76, 83, 89, 101, 113, 118, 124, 126, 127, 164]	0.264151	0.144404	0.119747	0.556221	0.114949	0.659084	9.17952e-05	0.624219	0.0498515	7	9	21	21	50	55	43	47	4	5	3	6	7	12	2	4	0	1	0	7	0	1	0	2	0	0	0	0	0
MICAL1	ENSG00000135596.18	chr6	-	109445862	109446135	3AS	TRUE	0.0392305	0.000257707	[1, 80, 39, 70, 59, 68, 18, 0, 56, 63, 74, 86, 155, 93, 57, 117, 132, 137, 154, 15, 25, 31, 45, 61, 64, 82, 83, 87, 92, 96, 151, 5, 17, 24, 32, 71, 72, 73, 81, 88, 128, 158, 4, 6, 7, 10, 14, 19, 30, 34, 35, 36, 48, 52, 55, 58, 65, 67, 77, 78, 91, 95, 102, 103, 106, 107, 108, 109, 115, 116, 118, 120, 121, 122, 134, 135, 136, 139, 164, 170, 176, 180, 182]	[60, 97, 76, 149, 166, 130, 131, 23, 157, 159, 84, 156, 33, 167, 46, 177, 62, 69, 99, 124, 129, 133, 11, 152, 160, 163, 169, 123, 9, 12, 13, 140, 143, 16, 144, 145, 146, 21, 153, 27, 165, 168, 171, 172, 173, 47, 174, 49, 175, 51, 53, 178, 179, 66, 75, 85, 100, 104, 119, 125, 127]	0.275943	0.371622	0.0956782	0.524637	3.75227e-05	0.198857	0.0105894	0.347159	0.0386024	0	0	2	4	0	0	1	2	1	1	0	0	2	3	0	0	0	0	0	0	0	0	0	0	0	0	4	5	0
CROCCP2	ENSG00000215908.10	chr1	-	16632371	16635026	ES	TRUE	0.040418	0.000266006	[253, 247, 187, 61, 235, 238, 245, 266, 270, 276, 285, 288, 289, 290, 292, 37, 294, 297, 299, 300, 176, 177, 52, 181, 64, 203, 205, 80, 224, 225, 243, 244]	[43, 22, 8, 30, 70, 3, 7, 1, 44, 15, 28, 75, 12, 63, 84, 101, 9, 51, 74, 83, 134, 147, 202, 31, 53, 57, 68, 121, 122, 207, 208, 210, 280, 17, 19, 66, 85, 93, 119, 125, 148, 195, 260, 275, 279, 11, 20, 26, 33, 36, 67, 86, 88, 97, 104, 117, 129, 133, 153, 154, 156, 163, 164, 174, 182, 200, 204, 211, 217, 223, 226, 228, 234, 239, 251, 264, 277, 278, 305, 4, 5, 10, 13, 16, 18, 21, 24, 29, 32, 35, 42,…	1	0.998058	0.00194175	0.864967	0.00337329	0.979488	0.00021058	0.920757	0.00620755	1	1	7	8	3	4	21	22	0	2	0	0	10	10	0	0	0	0	7	8	1	4	28	35	0	0	16	18	1
SRSF10	ENSG00000188529.15	chr1	-	23977453	23977910	IR	TRUE	0.0405077	0.000267097	[27, 8, 37, 41, 13, 123, 6, 239, 92, 158, 259, 183, 201, 357, 258, 260, 281, 294, 375, 134, 139, 391, 272, 184, 329, 352, 99, 235, 389, 264, 138, 396, 397, 401, 403, 151, 408, 25, 153, 154, 288, 421, 296, 298, 299, 425, 301, 47, 48, 50, 437, 56, 330, 341, 342, 87, 215, 343, 356, 107, 240, 113, 370, 117, 378, 253]	[28, 14, 59, 161, 44, 63, 45, 74, 189, 36, 196, 219, 114, 105, 57, 118, 199, 245, 200, 96, 136, 206, 83, 256, 295, 53, 181, 216, 223, 111, 247, 129, 130, 145, 40, 192, 82, 120, 372, 268, 143, 398, 399, 166, 171, 46, 175, 310, 186, 447, 449, 73, 75, 458, 337, 89, 217, 344, 348, 349, 224, 101, 248, 251]	1	0.998556	0.00144404	0.675503	0.0272274	0.503716	0.00330422	0.5945	0.0258374	33	79	76	129	70	135	110	220	23	47	24	74	49	64	3	11	2	3	16	19	5	6	37	42	0	0	0	0	6
STIL	ENSG00000123473.16	chr1	-	47263062	47269634	3AS	FALSE	0.0405984	0.000268197	[7, 8, 3, 41, 38, 44, 26, 87, 52, 32, 263, 33, 55, 154, 210, 197, 173, 292, 304, 25, 78, 99, 114, 257, 271, 281, 305, 341, 357, 490, 493, 531, 28, 35, 60, 70, 111, 169, 171, 182, 231, 240, 246, 256, 276, 284, 299, 330, 353, 461, 474, 503, 0, 519, 520, 526, 16, 20, 29, 34, 549, 553, 558, 560, 51, 53, 567, 58, 576, 577, 578, 581, 583, 584, 116, 117, 123, 126, 128, 133, 140, 144, 146, 162, 165, 170,…	[2, 9, 5, 19, 27, 15, 1, 13, 42, 115, 11, 23, 30, 40, 156, 119, 142, 158, 93, 50, 63, 75, 84, 103, 172, 179, 64, 122, 141, 71, 101, 221, 484, 47, 56, 82, 83, 98, 106, 138, 208, 296, 319, 472, 54, 73, 85, 108, 120, 127, 132, 159, 202, 226, 233, 239, 280, 321, 464, 554, 573, 14, 31, 39, 57, 59, 74, 76, 77, 81, 86, 95, 102, 112, 135, 145, 152, 166, 175, 198, 213, 216, 222, 234, 242, 255, 283, 294, 3…	0.254844	0.232542	0.0223011	0.717468	0.000124313	0.563006	0.032176	0.659399	0.0135768	0	0	3	4	0	0	5	5	2	2	1	1	0	0	0	0	5	5	1	1	0	0	18	30	0	0	2	2	7
RASA2	ENSG00000155903.13	chr3	+	141553940	141555839	3AS	TRUE	0.0407855	0.000270441	[0, 12, 1, 11, 25, 52, 61, 126, 67, 65, 68, 70, 46, 92, 111, 116, 175, 214, 216, 225, 79, 132, 150, 182, 241, 4, 33, 35, 43, 83, 84, 90, 120, 183, 185, 196, 232, 23, 37, 51, 55, 59, 63, 64, 78, 87, 99, 104, 121, 123, 134, 147, 158, 168, 215, 227, 229, 255, 267, 284, 300, 301, 2, 8, 13, 17, 19, 28, 29, 32, 36, 39, 40, 41, 44, 45, 49, 50, 54, 60, 62, 66, 69, 71, 72, 76, 77, 80, 81, 82, 85, 86, 91, …	[22, 16, 18, 15, 58, 233, 180, 107, 193, 223, 21, 47, 176, 178, 56, 133, 177, 57, 259, 131, 260, 7, 261, 264, 10, 265, 268, 14, 270, 274, 148, 151, 24, 279, 282, 283, 156, 285, 288, 162, 163, 164, 292, 167, 296, 169, 42, 170, 298, 173, 302, 197, 202, 206, 96, 113, 250, 251, 252, 309]	0.165986	1	0.834014	0.181329	0.00966733	0.0559234	0.00143298	0.118497	0.00973623	12	69	17	67	28	177	14	60	12	51	3	22	0	26	1	7	1	6	4	27	4	8	7	28	0	0	0	4	8
COASY	ENSG00000068120.15	chr17	+	42562219	42562611	ES	FALSE	0.0407855	0.000270903	[5, 26, 47, 94, 55, 36, 81, 131, 134, 143, 144, 17, 27, 34, 43, 53, 61, 79, 84, 85, 87, 88, 104, 105]	[1, 51, 46]	0.169118	0	0.169118	0.356722	0.0503015	0.0444858	1.08592e-05	0.187227	0.0415019	0	0	0	0	1	1	0	3	0	0	0	0	0	7	0	0	0	0	8	13	0	1	0	2	0	0	0	0	1
GPR171	ENSG00000174946.7	chr3	-	151203103	151203215	AFJ	TRUE	0.0407855	0.000270943	[4, 0, 3, 1, 2, 14]	[5, 7, 10, 11, 9, 6, 8, 12, 13, 15, 16, 17, 18, 19, 20, 21, 22, 23]	0.0833333	0.0225564	0.0607769	0.916675	1.27165e-05	0.6	0.239999	0.805776	0.0702788	0	0	0	0	0	0	0	0	0	0	0	0	0	0	0	0	7	7	0	0	9	10	0	0	11	11	1	1	2
RRN3	ENSG00000278494.2	KI270853.1	+	585029	589577	5AS	TRUE	0.0407873	0.000271459	[40, 70, 137, 142, 64, 48, 212, 99, 71, 221, 109, 18, 44, 184, 108, 119, 264, 37, 294, 296, 179, 65, 84, 236, 130, 258, 262, 265, 266, 269, 16, 273, 275, 280, 286, 287, 289, 164, 295, 41, 171, 299, 301, 304, 305, 308, 183, 59, 203, 77, 216, 220, 94, 103, 239, 114, 242, 118, 123]	[69, 19, 106, 138, 126, 2, 107, 133, 29, 10, 195, 213, 229, 105, 129, 145, 165, 174, 66, 199, 95, 233, 135, 8, 11, 146, 281, 157, 170, 182, 187, 189, 190, 191, 68, 197, 200, 205, 82, 85, 222, 227, 231, 232, 124, 125]	0.996644	1	0.0033557	0.243888	0.0653691	0.521625	3.16417e-05	0.348125	0.0661383	4	6	13	22	20	41	25	46	1	7	0	1	11	17	0	1	0	1	0	1	0	5	0	16	0	0	0	1	0
SRSF11	ENSG00000116754.13	chr1	+	70250607	70253046	ALJ	TRUE	0.0408871	0.000272628	[26, 5, 6, 31, 27, 37, 174, 211, 47, 57, 86, 119, 80, 290, 110, 84, 0, 359, 32, 58, 69, 138, 87, 144, 201, 115, 23, 76, 137, 49, 139, 229, 352, 652, 105, 233, 323, 333, 358, 270, 77, 151, 348, 568, 317, 7, 279, 324, 433, 159, 205, 252, 371, 382, 409, 458, 643, 111, 163, 209, 217, 250, 399, 154, 311, 501, 595, 628, 734, 845, 63, 145, 235, 239, 393, 445, 487, 667, 758, 764, 801, 1023, 19, 61, 101, …	[28, 2, 1, 41, 338, 88, 55, 178, 39, 65, 244, 89, 81, 165, 169, 3, 179, 370, 42, 29, 149, 223, 72, 287, 122, 64, 397, 369, 246, 11, 120, 334, 377, 109, 326, 133, 191, 421, 460, 214, 36, 93, 265, 384, 34, 262, 226, 286, 381, 518, 162, 176, 591, 372, 345, 746, 402, 143, 158, 184, 268, 298, 414, 53, 391, 938, 103, 329, 573, 45, 200, 230, 322, 446, 570, 744, 282, 302, 342, 508, 1089, 177, 583, 100, 2…	0.360352	0.369338	0.00898611	0.628297	0.00415773	0.628515	2.25192e-05	0.627237	0.00252778	223	373	389	652	675	1108	478	703	361	566	432	724	374	604	100	162	83	136	78	121	71	118	289	434	21	29	16	27	96
DCK	ENSG00000156136.10	chr4	+	71022560	71023546	IR	TRUE	0.0409281	0.000273406	[12, 48, 151, 201, 155, 29, 160, 193, 145, 249]	[10, 45, 9, 75, 79, 85, 148, 69, 73, 130, 13, 175, 58, 84, 91, 228, 108, 236, 238, 115, 116, 119, 251, 124]	0.103797	1	0.896203	0.405896	0.0496699	0.779157	0.0204856	0.54307	0.0739448	10	38	73	95	25	45	53	102	4	17	7	11	18	20	9	12	1	11	0	7	2	3	12	19	0	0	0	4	5
LINC00494	ENSG00000235621.9	chr20	+	48360150	48363931	3AS	TRUE	0.0409622	0.00027474	[18, 36, 111, 102, 89, 69, 49, 120]	[5, 10, 6, 4, 2, 40, 38, 21, 43, 66, 29, 35, 52, 60, 65, 39, 45, 59, 92, 27, 63, 70, 73, 88, 90, 99, 101, 109, 116, 15, 22, 23, 24, 37, 41, 48, 51, 55, 75, 76, 77, 78, 80, 81, 83, 91, 93, 95, 97, 100, 104, 106, 108, 110, 113, 114, 123, 126, 131]	1	1	0	0.845679	0.00707635	0.962336	1.16314e-06	0.920775	0.0039722	4	4	79	87	89	97	57	76	2	6	2	3	37	42	8	8	0	0	0	0	2	2	0	0	0	0	0	0	0
IKZF5	ENSG00000095574.12	chr10	-	122994723	122995993	3AS	TRUE	0.0409622	0.000274744	[2, 1, 3, 4, 6, 8, 25, 0, 5, 22, 64, 59, 33, 28, 19, 7, 32, 70, 15, 18, 38, 54, 58, 61, 68, 80, 10, 14, 20, 42, 101, 141, 69, 151, 157, 176, 233, 35, 39, 56, 88, 172, 190, 23, 26, 36, 45, 47, 111, 120, 134, 140, 149, 153, 159, 181, 191, 206, 209, 218, 232, 11, 13, 21, 24, 27, 31, 40, 41, 43, 44, 48, 50, 51, 52, 53, 62, 71, 73, 76, 83, 84, 86, 87, 90, 91, 93, 95, 97, 103, 107, 109, 112, 114, 116, …	[17, 168, 128, 146, 166, 136, 132, 137, 187, 148, 152, 170, 223, 96, 131, 138, 46, 177, 180, 185, 186, 195, 196, 201, 205, 208, 211, 219, 226, 234, 236, 238, 125]	0.173565	0.0986842	0.0748812	0.0933422	0.00612549	0.0202193	0.00140179	0.0571446	0.00523886	2	33	1	52	2	71	8	79	11	97	0	63	0	33	1	7	0	22	24	66	8	45	21	116	0	0	1	13	12
TRIM38	ENSG00000112343.11	chr6	+	25969420	25971922	IR	TRUE	0.0409622	0.000275152	[27, 79, 236, 262, 65, 225, 231, 241, 126, 255, 131, 132, 7, 300, 320, 342, 228, 229, 230, 232, 242, 246]	[46, 24, 31, 14, 128, 123, 124, 56, 83, 240, 117, 152, 156, 292, 200, 76, 211, 87, 350, 120, 253]	0.384615	1	0.615385	0.367786	0.0364789	0.774413	0.000111705	0.511314	0.0551555	8	9	10	13	6	14	7	27	4	12	0	4	6	16	1	3	0	2	0	0	1	1	0	0	0	0	0	1	0
USP28	ENSG00000048028.11	chr11	-	113829345	113833419	3AS	TRUE	0.0409939	0.000276883	[264, 34, 280, 259, 64, 224, 500, 262, 676, 947, 331, 291, 194, 601, 491, 499, 515, 637, 135, 518, 783, 530, 914, 924, 940, 173, 301, 303, 304, 557, 307, 182, 955, 574, 334, 725, 214, 342, 726, 108, 494, 498, 887, 632, 762, 125, 984, 985]	[971, 634, 960, 890, 773, 775, 904, 160, 935, 969, 76, 348, 362, 747, 874, 755, 244, 758, 119, 767]	1	1	0	0.476363	0.000181709	0.0742152	0.00688707	0.260124	0.0490969	0	0	6	14	0	0	3	4	1	1	0	1	1	4	0	0	0	0	0	0	0	1	2	2	0	0	0	0	0
CDC27	ENSG00000004897.12	chr17	-	47154786	47157229	5AS	TRUE	0.0409939	0.000276359	[73, 407, 365, 665, 801, 568, 823, 835, 713, 721, 238, 625, 781, 806, 951, 862, 867, 128, 899, 656, 273, 403, 916, 794, 922, 932, 681, 811, 45, 815, 818, 692, 821, 950, 439, 960, 454, 839, 843, 718, 597, 728, 730, 858, 732, 860, 750, 629, 630, 767, 983, 985]	[0, 21, 164, 183, 107, 35, 243, 251, 252, 249, 286, 248, 509, 5, 263, 297, 315, 317, 359, 410, 412, 26, 28, 233, 278, 408, 169, 197, 202, 340, 389, 157, 795, 290, 342, 8, 682, 710, 231, 232, 319, 351, 436, 447, 448, 486, 495, 538, 543, 111, 176, 190, 191, 722, 253, 274, 277, 281, 284, 300, 310, 829, 832, 331, 367, 399, 924, 430, 433, 957, 450, 461, 501, 516, 517, 530, 531, 535, 545, 551, 42, 48, …	1	1	0	0.767454	0.0773263	0.973384	1.7225e-06	0.839842	0.0476103	19	19	38	39	62	62	16	16	17	17	17	18	17	17	7	7	3	7	4	5	3	4	30	51	0	0	1	1	9
NDUFAF5	ENSG00000101247.18	chr20	+	13814515	13816462	3AS	TRUE	0.0409939	0.000276393	[0, 1, 22, 77, 124, 6, 139, 152, 109, 221, 86, 104, 8, 13, 161, 34, 92, 147, 178, 138, 145, 15, 117, 222, 224, 318, 41, 128, 162, 181, 201, 4, 52, 106, 158, 163, 197, 231, 254, 334, 378, 21, 40, 44, 58, 67, 82, 110, 127, 136, 166, 180, 189, 191, 192, 193, 194, 203, 210, 214, 243, 252, 256, 277, 295, 322, 341, 344, 347, 368, 386, 2, 10, 20, 23, 32, 35, 37, 38, 42, 48, 56, 59, 60, 61, 64, 65, 69, 7…	[237, 261, 266, 134, 274, 419, 246, 260, 390, 392, 276, 150, 24, 301, 429, 310, 311, 443, 190, 356, 233, 108, 240, 245, 122, 255]	1	1	0	0.0978771	0.00493708	0.0108486	3.67698e-07	0.0537937	0.00450634	1	7	5	34	3	83	14	64	0	20	0	25	5	57	2	5	0	2	1	3	0	3	1	18	0	0	0	6	3
CEP43	ENSG00000213066.13	chr6	+	167040121	167040234	IR	TRUE	0.0415271	0.000280998	[17, 21, 30, 177, 59, 44, 196, 104, 145, 26, 156, 157, 68, 105, 131, 5, 8, 11, 146, 22, 25, 28, 32, 160, 34, 37, 165, 166, 41, 169, 171, 47, 50, 179, 180, 182, 184, 62, 63, 190, 191, 215, 88, 221, 224, 225, 226, 231, 108, 236, 110, 245, 247, 250, 251]	[1, 0, 2, 61, 3, 150, 9, 84, 123, 6, 14, 15, 67, 90, 54, 92, 109, 89, 100, 118, 138, 158, 43, 82, 91, 94, 106, 116, 117, 127, 130, 148, 192, 204, 213, 232, 234, 4, 24, 56, 57, 58, 60, 66, 85, 86, 95, 97, 99, 103, 107, 112, 115, 119, 120, 124, 125, 126, 129, 135, 137, 139, 140, 141, 142, 143, 147, 149, 151, 153, 154, 161, 163, 164, 167, 168, 183, 185, 187, 188, 189, 193, 195, 197, 198, 199, 200, 2…	0.858491	0.297254	0.561237	0.779585	0.0220902	0.951053	0.00293697	0.871157	0.0190881	27	31	14	32	20	23	4	9	8	13	17	21	9	12	17	18	3	3	0	0	4	4	4	4	13	13	1	1	5
MID1IP1	ENSG00000165175.16	chrX	+	38804682	38806443	ALJ	TRUE	0.0415993	0.000282	[5, 13, 35, 3, 7, 8, 9, 10, 11, 14, 15, 16, 17, 18, 19, 21, 22, 23, 24, 27, 28, 29, 30, 32, 33, 34]	[1, 0, 6, 2, 12, 4, 20, 25, 26, 31]	0.11875	0.00318134	0.115569	0.855534	0.0063509	0.939163	2.90002e-06	0.907051	0.00150275	0	1	8	11	11	12	38	41	0	0	0	0	48	54	0	1	1	1	166	170	17	18	72	75	0	1	122	137	2
ATL2	ENSG00000119787.14	chr2	-	38317349	38318534	IR	TRUE	0.0416426	0.000282807	[67, 240, 244, 73, 178, 359, 331, 49, 219, 348, 190]	[13, 37, 50, 40, 52, 87, 61, 63, 105, 136, 142, 283, 167, 187, 196, 71, 207, 129, 262, 263, 264, 139, 267, 271, 19, 280, 281, 27, 318, 209, 91, 96, 234, 236, 366, 111, 251, 396]	1	1	0	0.794881	0.0692627	0.92094	4.72301e-06	0.890327	0.0105779	6	7	14	15	10	10	2	2	4	5	7	7	20	20	0	0	2	2	0	1	0	0	4	6	0	0	0	0	0
PB_novel_18980	PB_novel_18980	chr5	+	112529836	112532589	ALJ	TRUE	0.0417395	0.000284421	[0, 10, 1, 27, 13, 22, 7, 18, 30, 16, 19, 20, 23, 24, 25, 26, 31, 32, 33, 34, 35, 36, 37, 38, 41, 42, 43, 44, 45, 46, 47]	[3, 4, 2, 11, 5, 12, 9, 17, 15, 29, 6, 14, 21, 28, 39, 40, 48]	0.912162	0.99002	0.0778578	0.64235	0.072007	0.888732	9.75531e-05	0.749204	0.0380234	10	47	42	49	22	60	40	47	8	22	4	5	20	20	0	0	0	0	0	0	0	0	0	0	0	0	0	0	0
BNIP3	ENSG00000176171.11	chr10	-	131968569	131970637	3AS	TRUE	0.0417395	0.000284496	[0, 2, 9, 12, 19, 22, 23, 24, 25, 27, 30]	[4, 10, 17, 14, 20, 32, 33, 3, 6, 26, 28, 29, 31, 34]	0.119149	0.0793651	0.0397839	0.159574	0.00360859	0.0282641	0.000199342	0.0950703	0.00628959	1	11	1	6	3	10	1	11	0	9	0	11	1	12	1	17	0	1	0	5	0	0	28	125	0	0	0	0	2
NAA16	ENSG00000172766.19	chr13	+	41372830	41373767	IR	TRUE	0.0420983	0.000287461	[31, 67, 36, 189, 233, 21, 68, 33, 340, 347, 224, 226, 409, 59, 62, 319, 326, 216, 346, 223, 229, 236, 247, 250, 264, 265, 18, 22, 27, 320, 323, 72, 205, 207, 341, 342, 344, 219, 353, 227, 359, 232, 240, 243]	[45, 54, 117, 111, 118, 105, 11, 174, 178, 185, 30]	1	1	0	0.00966766	0.000340643	0.571787	0.169797	0.190418	0.126879	0	4	0	18	0	16	0	17	0	3	0	1	0	10	0	1	0	3	0	3	0	0	0	16	0	0	0	0	0
BX571818.1	ENSG00000285417.1	chr1	+	206053265	206056178	IR	TRUE	0.0423333	0.000289589	[39, 5, 31, 68, 52, 96, 97, 128, 99, 130, 118]	[16, 12, 2, 13, 43, 46, 45, 48, 47, 65, 29, 104, 51, 59, 101, 38, 42, 55, 64, 66, 93, 105, 132, 11, 36, 54, 61, 67, 81, 84, 92, 108, 116]	1	1	0	0.811852	8.97902e-06	0.906083	0.00925185	0.851743	0.0121423	28	35	79	90	45	58	73	91	20	24	38	48	45	54	9	12	3	3	0	0	1	1	0	0	0	0	0	0	0
AC254945.2	ENSG00000282168.4	KQ031389.1	+	2154621	2157402	ALJ	TRUE	0.0427427	0.000292917	[8, 45, 10, 44, 46, 47, 2, 11, 26, 27, 28, 36, 42, 50, 53, 55]	[1, 6, 5, 3, 14, 19, 13, 35, 18, 23, 25, 31, 40, 52, 0, 9, 17, 37, 38, 41, 4, 7, 12, 15, 16, 20, 21, 22, 24, 29, 30, 32, 33, 34, 39, 43, 48, 49, 51, 54, 56, 57, 58]	0.269231	0.0863931	0.182838	0.964072	6.28381e-06	0.657342	0.158115	0.800579	0.0666264	0	0	0	0	0	0	0	0	3	3	1	1	0	0	0	0	0	0	1	1	0	0	3	3	0	0	0	0	0
MLH3	ENSG00000119684.16	chr14	-	75042477	75046375	3AS	TRUE	0.0430581	0.000295611	[3, 4, 1, 25, 7, 13, 6, 30, 50, 93, 8, 33, 39, 49, 54, 56, 2, 9, 19, 22, 34, 40, 71, 72, 0, 5, 10, 11, 12, 16, 18, 23, 24, 26, 29, 31, 36, 37, 38, 42, 43, 44, 47, 48, 52, 55, 57, 58, 60, 61, 62, 63, 64, 66, 67, 68, 70, 73, 74, 75, 77, 78, 79, 81, 86, 90, 92, 96, 97, 98]	[17, 69, 51, 91, 32, 35, 14, 15, 80, 88, 89]	0.370044	0.263158	0.106886	0.137446	1.9929e-05	0.0114075	0.000851415	0.0785176	0.0029749	1	7	1	24	0	7	2	8	1	6	1	7	0	4	0	0	0	0	0	0	0	0	0	1	0	0	0	1	0
[truncated: 219 more rows]
[truncated: 105 more columns]

## Sheet: gProfiler on genes with ASEs
# The result of gene set enrichment analysis using gProfiler and unique genes with i) a significantly different splicing event (ASE); ii) intron retention (IR), or 3' alternative splice site (3AS). Only significant terms are shown
query	significant	p_value	term_size	query_size	intersection_size	precision	recall	term_id	source	term_name	effective_domain_size	source_order	evidence_codes	intersection
[truncated: 2 more rows]

## Sheet: 3'AS called in all
gene	gene_id	chrom	strand	start	alternative	end	NMD1	NMD2	3AS_effect	ORF_diff	AS_shift	coding	padj
[truncated: 326 more rows]

[truncated: 2 more sheets: rMATSvIsoTools, README]
