# Supplementary material for: Long-read transcriptome sequencing of CLL and MDS patients uncovers molecular effects of SF3B1 mutations
Source: HighWire-hosted journal article supplement (doi:10.1101/gr.279327.124), 2024-09-13
Supplement: Supplemental_Table_S6.xlsx [file Supplemental_Table_S6.xlsx]

## Sheet: SF3B1 binding regions
# Reproducible binding sites			96,852
# Target genes			8,127
chromosome	start	end	cluster
chr1	961244	961325	Rest
chr1	961542	961623	SinglePeak
chr1	962071	962152	DoubleWide
chr1	962250	962331	SinglePeak
chr1	962614	962695	SinglePeak
chr1	1045865	1045946	SinglePeak
chr1	1046103	1046184	SinglePeak
chr1	1046311	1046392	DoubleNarrow
chr1	1046943	1047024	SinglePeak
chr1	1047186	1047267	SinglePeak
chr1	1047253	1047334	SinglePeak
chr1	1053664	1053745	SinglePeak
chr1	1476485	1476566	SinglePeak
chr1	1476778	1476859	SinglePeak
chr1	1477678	1477759	DoubleNarrow
chr1	1477973	1478054	DoubleNarrow
chr1	1478132	1478213	SinglePeak
chr1	1484640	1484721	SinglePeak
chr1	1485690	1485771	SinglePeak
chr1	1489115	1489196	SinglePeak
chr1	1489401	1489482	SinglePeak
chr1	1489588	1489669	DoubleNarrow
chr1	1490126	1490207	SinglePeak
chr1	1490194	1490275	DoubleNarrow
chr1	1495403	1495484	SinglePeak
chr1	1516392	1516473	SinglePeak
chr1	1523419	1523500	SinglePeak
chr1	1527600	1527681	SinglePeak
chr1	1527931	1528012	SinglePeak
chr1	1529132	1529213	SinglePeak
chr1	1533844	1533925	SinglePeak
chr1	2302908	2302989	DoubleWide
chr1	2303202	2303283	SinglePeak
chr1	2393921	2394002	SinglePeak
chr1	2394039	2394120	SinglePeak
chr1	2394145	2394226	DoubleWide
chr1	2394350	2394431	Rest
chr1	2394824	2394905	SinglePeak
chr1	2395711	2395792	DoubleWide
chr1	2395841	2395922	SinglePeak
chr1	2397959	2398040	SinglePeak
chr1	2399431	2399512	SinglePeak
chr1	2399523	2399604	SinglePeak
chr1	2400547	2400628	DoubleWide
chr1	2400800	2400881	SinglePeak
chr1	2401720	2401801	SinglePeak
chr1	2402069	2402150	SinglePeak
chr1	2402415	2402496	SinglePeak
chr1	2402586	2402667	SinglePeak
chr1	2402943	2403024	DoubleNarrow
chr1	3775201	3775282	SinglePeak
chr1	6210291	6210372	SinglePeak
chr1	6210772	6210853	SinglePeak
chr1	6211787	6211868	SinglePeak
chr1	6212629	6212710	SinglePeak
chr1	6212944	6213025	SinglePeak
chr1	6580455	6580536	SinglePeak
chr1	6581312	6581393	SinglePeak
chr1	6582286	6582367	SinglePeak
chr1	6586223	6586304	SinglePeak
chr1	6587136	6587217	DoubleWide
chr1	6587366	6587447	SinglePeak
chr1	6588669	6588750	SinglePeak
chr1	6616678	6616759	DoubleWide
chr1	6871667	6871748	DoubleNarrow
chr1	6871834	6871915	SinglePeak
chr1	7773372	7773453	DoubleWide
chr1	7778164	7778245	SinglePeak
chr1	7779542	7779623	DoubleWide
chr1	7819190	7819271	Rest
chr1	7835710	7835791	SinglePeak
chr1	7965236	7965317	DoubleNarrow
chr1	7970796	7970877	SinglePeak
chr1	7977576	7977657	DoubleWide
chr1	9553535	9553616	SinglePeak
chr1	9573270	9573351	DoubleWide
chr1	9573422	9573503	SinglePeak
chr1	9576373	9576454	SinglePeak
chr1	9579879	9579960	DoubleWide
chr1	9609745	9609826	SinglePeak
chr1	9610416	9610497	SinglePeak
chr1	9716357	9716438	DoubleNarrow
chr1	9971927	9972008	SinglePeak
chr1	10072204	10072285	SinglePeak
chr1	10072389	10072470	DoubleWide
chr1	10095360	10095441	SinglePeak
chr1	10100984	10101065	DoubleNarrow
chr1	10102876	10102957	DoubleWide
chr1	10105421	10105502	SinglePeak
chr1	10119425	10119506	SinglePeak
chr1	10121861	10121942	SinglePeak
chr1	10126718	10126799	DoubleWide
chr1	10126892	10126973	SinglePeak
chr1	10129341	10129422	SinglePeak
chr1	10130406	10130487	SinglePeak
chr1	10130642	10130723	DoubleWide
chr1	10132259	10132340	SinglePeak
chr1	10144878	10144959	DoubleNarrow
chr1	10146877	10146958	DoubleWide
chr1	10149108	10149189	DoubleWide
chr1	10161054	10161135	DoubleNarrow
chr1	10168031	10168112	DoubleNarrow
chr1	10171041	10171122	DoubleNarrow
chr1	10178554	10178635	SinglePeak
chr1	10262974	10263055	SinglePeak
chr1	10267312	10267393	SinglePeak
chr1	10275357	10275438	DoubleWide
chr1	10275878	10275959	SinglePeak
chr1	10276235	10276316	DoubleNarrow
chr1	10291966	10292047	SinglePeak
chr1	10297120	10297201	SinglePeak
chr1	10319960	10320041	SinglePeak
chr1	10321619	10321700	SinglePeak
chr1	10324666	10324747	SinglePeak
chr1	10374773	10374854	SinglePeak
chr1	10375201	10375282	SinglePeak
chr1	10400278	10400359	SinglePeak
chr1	10400628	10400709	SinglePeak
chr1	10407580	10407661	SinglePeak
chr1	10408001	10408082	DoubleWide
chr1	10408119	10408200	SinglePeak
chr1	10411541	10411622	SinglePeak
chr1	10412983	10413064	DoubleWide
chr1	10413224	10413305	DoubleWide
chr1	10413557	10413638	SinglePeak
chr1	10416907	10416988	DoubleWide
chr1	10417147	10417228	SinglePeak
chr1	10417679	10417760	SinglePeak
chr1	10418760	10418841	SinglePeak
chr1	10419342	10419423	DoubleWide
chr1	10536108	10536189	SinglePeak
chr1	10540977	10541058	SinglePeak
chr1	11016750	11016831	SinglePeak
chr1	11018859	11018940	SinglePeak
chr1	11020354	11020435	DoubleWide
chr1	11022042	11022123	DoubleWide
chr1	11023095	11023176	DoubleNarrow
chr1	11023310	11023391	DoubleNarrow
chr1	11023407	11023488	SinglePeak
chr1	11023495	11023576	SinglePeak
chr1	11023987	11024068	DoubleWide
chr1	11025007	11025088	DoubleNarrow
chr1	11750006	11750087	SinglePeak
chr1	11806557	11806638	SinglePeak
chr1	11806821	11806902	SinglePeak
chr1	11807035	11807116	DoubleNarrow
chr1	11815762	11815843	SinglePeak
chr1	11816420	11816501	SinglePeak
chr1	11819642	11819723	SinglePeak
chr1	11822614	11822695	SinglePeak
chr1	11822797	11822878	SinglePeak
chr1	11823933	11824014	SinglePeak
chr1	11824050	11824131	SinglePeak
chr1	11824406	11824487	DoubleWide
chr1	11826995	11827076	SinglePeak
chr1	11828003	11828084	SinglePeak
chr1	11828206	11828287	SinglePeak
chr1	11828393	11828474	DoubleNarrow
chr1	11829121	11829202	SinglePeak
chr1	11829305	11829386	SinglePeak
chr1	11829435	11829516	SinglePeak
chr1	11832178	11832259	SinglePeak
chr1	11833445	11833526	DoubleWide
chr1	11833841	11833922	SinglePeak
chr1	11834070	11834151	SinglePeak
chr1	11835245	11835326	SinglePeak
chr1	11836346	11836427	SinglePeak
chr1	11838649	11838730	SinglePeak
chr1	11840071	11840152	DoubleWide
chr1	11840961	11841042	DoubleWide
chr1	11845443	11845524	DoubleWide
chr1	11947904	11947985	SinglePeak
chr1	11956861	11956942	SinglePeak
chr1	11957774	11957855	SinglePeak
chr1	11970587	11970668	SinglePeak
chr1	11981757	11981838	SinglePeak
chr1	11981902	11981983	DoubleWide
chr1	11989077	11989158	SinglePeak
chr1	11992481	11992562	Rest
chr1	11996066	11996147	SinglePeak
chr1	11998956	11999037	SinglePeak
chr1	11999162	11999243	SinglePeak
chr1	12000849	12000930	SinglePeak
chr1	12000991	12001072	SinglePeak
chr1	12001157	12001238	DoubleWide
chr1	12001296	12001377	SinglePeak
chr1	12001541	12001622	SinglePeak
chr1	12002355	12002436	SinglePeak
chr1	12003294	12003375	SinglePeak
chr1	12003905	12003986	SinglePeak
chr1	12004441	12004522	DoubleWide
chr1	12004885	12004966	SinglePeak
chr1	12005654	12005735	SinglePeak
chr1	12006104	12006185	SinglePeak
chr1	12006688	12006769	SinglePeak
chr1	12007242	12007323	SinglePeak
chr1	12007531	12007612	SinglePeak
chr1	12009488	12009569	SinglePeak
chr1	12021548	12021629	SinglePeak
chr1	12022013	12022094	SinglePeak
chr1	12022735	12022816	SinglePeak
chr1	12031663	12031744	SinglePeak
chr1	12115472	12115553	SinglePeak
chr1	12123202	12123283	SinglePeak
chr1	12188742	12188823	SinglePeak
chr1	12190880	12190961	DoubleWide
chr1	12193105	12193186	SinglePeak
chr1	12242446	12242527	DoubleWide
chr1	12249146	12249227	DoubleWide
chr1	12253628	12253709	SinglePeak
chr1	12256887	12256968	DoubleNarrow
chr1	12268619	12268700	DoubleNarrow
chr1	12270900	12270981	SinglePeak
chr1	12279393	12279474	SinglePeak
chr1	12290943	12291024	SinglePeak
chr1	12293449	12293530	DoubleWide
chr1	12304434	12304515	DoubleWide
chr1	12311744	12311825	DoubleWide
chr1	12314037	12314118	DoubleWide
chr1	12314317	12314398	SinglePeak
chr1	12318007	12318088	SinglePeak
chr1	12318572	12318653	SinglePeak
chr1	12319412	12319493	DoubleNarrow
chr1	12319730	12319811	SinglePeak
chr1	12320925	12321006	SinglePeak
chr1	12321737	12321818	DoubleWide
chr1	12327489	12327570	DoubleNarrow
chr1	12327596	12327677	SinglePeak
chr1	12333135	12333216	DoubleNarrow
chr1	12335824	12335905	SinglePeak
chr1	12338146	12338227	DoubleNarrow
chr1	12341858	12341939	SinglePeak
chr1	12342331	12342412	SinglePeak
chr1	12342520	12342601	Rest
chr1	12345299	12345380	DoubleWide
chr1	12346520	12346601	SinglePeak
chr1	12346639	12346720	DoubleNarrow
chr1	12348747	12348828	DoubleWide
chr1	12349077	12349158	DoubleNarrow
chr1	12355831	12355912	DoubleWide
chr1	12358389	12358470	DoubleWide
chr1	12362650	12362731	DoubleWide
chr1	12362978	12363059	SinglePeak
chr1	12369363	12369444	SinglePeak
chr1	12373697	12373778	SinglePeak
chr1	12401540	12401621	DoubleWide
chr1	12403758	12403839	SinglePeak
chr1	12415007	12415088	DoubleWide
chr1	12416562	12416643	SinglePeak
chr1	12460129	12460210	DoubleWide
chr1	12497427	12497508	DoubleWide
chr1	12508821	12508902	DoubleWide
chr1	13772988	13773069	SinglePeak
chr1	13778314	13778395	SinglePeak
chr1	13786385	13786466	SinglePeak
chr1	15529004	15529085	DoubleNarrow
chr1	15534147	15534228	SinglePeak
chr1	15536420	15536501	SinglePeak
chr1	15544302	15544383	SinglePeak
chr1	15559457	15559538	DoubleWide
chr1	15567006	15567087	DoubleNarrow
chr1	15630273	15630354	SinglePeak
chr1	15638228	15638309	DoubleWide
chr1	15642412	15642493	SinglePeak
chr1	15643458	15643539	DoubleNarrow
chr1	15643641	15643722	SinglePeak
chr1	15649649	15649730	DoubleWide
chr1	15649806	15649887	SinglePeak
chr1	15659754	15659835	DoubleWide
chr1	15717771	15717852	DoubleNarrow
chr1	15717997	15718078	SinglePeak
chr1	15721232	15721313	Rest
chr1	15725240	15725321	DoubleWide
chr1	15727817	15727898	DoubleNarrow
chr1	15727983	15728064	DoubleNarrow
chr1	15728375	15728456	SinglePeak
chr1	15728616	15728697	SinglePeak
chr1	15730429	15730510	SinglePeak
chr1	15876122	15876203	DoubleWide
chr1	15909237	15909318	SinglePeak
chr1	15911025	15911106	DoubleWide
chr1	15916039	15916120	DoubleWide
chr1	15918859	15918940	DoubleWide
chr1	15919669	15919750	SinglePeak
chr1	15920041	15920122	SinglePeak
chr1	15920507	15920588	DoubleNarrow
chr1	15920698	15920779	SinglePeak
chr1	15920795	15920876	DoubleWide
chr1	15922471	15922552	SinglePeak
chr1	15928039	15928120	SinglePeak
chr1	15937062	15937143	SinglePeak
chr1	15938251	15938332	SinglePeak
chr1	15938625	15938706	SinglePeak
chr1	15939205	15939286	SinglePeak
chr1	16393138	16393219	SinglePeak
chr1	16394966	16395047	DoubleWide
chr1	16447974	16448055	SinglePeak
chr1	16449031	16449112	SinglePeak
chr1	16449985	16450066	SinglePeak
chr1	16451764	16451845	DoubleWide
chr1	16455716	16455797	DoubleWide
chr1	16458741	16458822	SinglePeak
chr1	19254710	19254791	DoubleWide
chr1	19254835	19254916	SinglePeak
chr1	19254946	19255027	SinglePeak
chr1	19257533	19257614	SinglePeak
chr1	19257781	19257862	SinglePeak
chr1	19258536	19258617	SinglePeak
chr1	19326932	19327013	SinglePeak
chr1	19327403	19327484	DoubleWide
chr1	19327890	19327971	SinglePeak
chr1	19328468	19328549	DoubleWide
chr1	19890302	19890383	SinglePeak
chr1	19894305	19894386	SinglePeak
chr1	19897462	19897543	DoubleWide
chr1	19904203	19904284	DoubleWide
chr1	19905014	19905095	SinglePeak
chr1	19907490	19907571	DoubleNarrow
chr1	21479965	21480046	SinglePeak
chr1	22081569	22081650	SinglePeak
chr1	22081653	22081734	DoubleWide
chr1	22081782	22081863	SinglePeak
chr1	22085808	22085889	SinglePeak
chr1	22086364	22086445	DoubleWide
chr1	22086615	22086696	DoubleNarrow
chr1	22089837	22089918	SinglePeak
chr1	22091367	22091448	DoubleNarrow
chr1	22501684	22501765	SinglePeak
chr1	22501803	22501884	DoubleWide
chr1	22502077	22502158	SinglePeak
chr1	22502222	22502303	DoubleWide
chr1	22505972	22506053	DoubleWide
chr1	22519974	22520055	SinglePeak
chr1	23050299	23050380	DoubleNarrow
chr1	23050498	23050579	SinglePeak
chr1	23053521	23053602	SinglePeak
chr1	23053826	23053907	SinglePeak
chr1	23053967	23054048	SinglePeak
chr1	23054994	23055075	DoubleWide
chr1	23055156	23055237	SinglePeak
chr1	23056006	23056087	SinglePeak
chr1	23057413	23057494	DoubleWide
chr1	23059000	23059081	DoubleWide
chr1	23059158	23059239	SinglePeak
chr1	23068467	23068548	DoubleWide
chr1	23068661	23068742	SinglePeak
chr1	23068980	23069061	DoubleNarrow
chr1	23069175	23069256	SinglePeak
chr1	23071346	23071427	SinglePeak
chr1	23072333	23072414	SinglePeak
chr1	23072782	23072863	SinglePeak
chr1	23077169	23077250	SinglePeak
chr1	23077377	23077458	SinglePeak
chr1	23078908	23078989	DoubleWide
chr1	23079467	23079548	SinglePeak
chr1	23079652	23079733	SinglePeak
chr1	23081371	23081452	DoubleWide
chr1	23083121	23083202	SinglePeak
chr1	23691820	23691901	SinglePeak
chr1	23693734	23693815	DoubleWide
chr1	23694606	23694687	SinglePeak
chr1	23694812	23694893	DoubleNarrow
chr1	23695174	23695255	Rest
chr1	23695724	23695805	DoubleWide
chr1	23696291	23696372	SinglePeak
chr1	23748948	23749029	DoubleWide
chr1	23749797	23749878	SinglePeak
chr1	23754267	23754348	SinglePeak
chr1	23754910	23754991	SinglePeak
chr1	23756189	23756270	Rest
chr1	23756871	23756952	SinglePeak
chr1	23778883	23778964	SinglePeak
chr1	23779769	23779850	SinglePeak
chr1	23780010	23780091	SinglePeak
chr1	23785617	23785698	DoubleNarrow
chr1	23785796	23785877	SinglePeak
chr1	23786403	23786484	SinglePeak
chr1	23786553	23786634	SinglePeak
chr1	23787210	23787291	DoubleWide
chr1	23792907	23792988	SinglePeak
chr1	23793032	23793113	DoubleNarrow
chr1	23794148	23794229	DoubleWide
chr1	23794610	23794691	DoubleWide
chr1	23960868	23960949	DoubleWide
chr1	23961190	23961271	SinglePeak
chr1	23961360	23961441	DoubleNarrow
chr1	24441982	24442063	DoubleWide
chr1	24453314	24453395	SinglePeak
chr1	24458801	24458882	SinglePeak
chr1	24463928	24464009	SinglePeak
chr1	24646065	24646146	SinglePeak
chr1	24646579	24646660	SinglePeak
chr1	24646852	24646933	SinglePeak
chr1	24646927	24647008	SinglePeak
chr1	24647163	24647244	SinglePeak
chr1	24647328	24647409	SinglePeak
chr1	24647561	24647642	SinglePeak
chr1	24647629	24647710	SinglePeak
chr1	24647707	24647788	DoubleNarrow
chr1	24647787	24647868	SinglePeak
chr1	24647951	24648032	DoubleWide
chr1	24648211	24648292	SinglePeak
chr1	24648282	24648363	DoubleNarrow
chr1	24648462	24648543	SinglePeak
chr1	24648783	24648864	DoubleNarrow
chr1	24650074	24650155	SinglePeak
chr1	24651319	24651400	SinglePeak
chr1	24651600	24651681	DoubleNarrow
chr1	24652378	24652459	SinglePeak
chr1	24652627	24652708	SinglePeak
chr1	24654409	24654490	SinglePeak
chr1	24654769	24654850	DoubleNarrow
chr1	24655124	24655205	SinglePeak
chr1	24655287	24655368	SinglePeak
chr1	24655481	24655562	SinglePeak
chr1	24660656	24660737	SinglePeak
chr1	24660827	24660908	SinglePeak
chr1	24661231	24661312	DoubleWide
chr1	24661377	24661458	SinglePeak
chr1	24662601	24662682	DoubleNarrow
chr1	24663106	24663187	DoubleWide
chr1	24663238	24663319	SinglePeak
chr1	24663411	24663492	SinglePeak
chr1	24666765	24666846	DoubleNarrow
chr1	24669054	24669135	DoubleWide
chr1	24669557	24669638	SinglePeak
chr1	24669769	24669850	SinglePeak
chr1	24670045	24670126	DoubleWide
chr1	24797873	24797954	SinglePeak
chr1	24814023	24814104	DoubleWide
chr1	24839790	24839871	DoubleWide
chr1	24840682	24840763	SinglePeak
chr1	25340372	25340453	SinglePeak
chr1	25351549	25351630	DoubleWide
chr1	25446683	25446764	DoubleWide
chr1	25448745	25448826	SinglePeak
chr1	25449016	25449097	SinglePeak
chr1	25454159	25454240	SinglePeak
chr1	25456570	25456651	DoubleNarrow
chr1	25484024	25484105	SinglePeak
chr1	25498191	25498272	SinglePeak
chr1	25554771	25554852	SinglePeak
chr1	25562545	25562626	DoubleNarrow
chr1	25565586	25565667	SinglePeak
chr1	25565866	25565947	SinglePeak
chr1	25823592	25823673	SinglePeak
chr1	25826537	25826618	DoubleWide
chr1	26121737	26121818	SinglePeak
chr1	26170524	26170605	SinglePeak
chr1	26239101	26239182	DoubleNarrow
chr1	26239219	26239300	SinglePeak
chr1	26239324	26239405	SinglePeak
chr1	26239483	26239564	DoubleNarrow
chr1	26239691	26239772	DoubleWide
chr1	26239844	26239925	DoubleNarrow
chr1	26244322	26244403	SinglePeak
chr1	26255009	26255090	SinglePeak
chr1	26255098	26255179	SinglePeak
chr1	26255853	26255934	DoubleNarrow
chr1	26256518	26256599	SinglePeak
chr1	26257503	26257584	SinglePeak
chr1	26259532	26259613	SinglePeak
chr1	26268414	26268495	DoubleWide
chr1	26269615	26269696	SinglePeak
chr1	26271094	26271175	SinglePeak
chr1	26274879	26274960	SinglePeak
chr1	26275256	26275337	SinglePeak
chr1	26276450	26276531	SinglePeak
chr1	26276764	26276845	SinglePeak
chr1	26276888	26276969	SinglePeak
chr1	26277058	26277139	DoubleWide
chr1	26280679	26280760	SinglePeak
chr1	26438091	26438172	DoubleWide
chr1	26442637	26442718	SinglePeak
chr1	26468788	26468869	SinglePeak
chr1	26473502	26473583	SinglePeak
chr1	26473611	26473692	SinglePeak
chr1	26473709	26473790	DoubleNarrow
chr1	26473903	26473984	SinglePeak
chr1	26474007	26474088	DoubleWide
chr1	26474123	26474204	SinglePeak
chr1	26474660	26474741	SinglePeak
chr1	26475026	26475107	DoubleNarrow
chr1	26536827	26536908	SinglePeak
chr1	26547073	26547154	SinglePeak
chr1	26551325	26551406	DoubleWide
chr1	26554781	26554862	SinglePeak
chr1	26555063	26555144	SinglePeak
chr1	26729563	26729644	DoubleNarrow
chr1	26731080	26731161	DoubleWide
chr1	26732440	26732521	SinglePeak
chr1	26760770	26760851	SinglePeak
chr1	26761294	26761375	SinglePeak
chr1	26761527	26761608	DoubleWide
chr1	26762063	26762144	SinglePeak
chr1	26762585	26762666	DoubleNarrow
chr1	26762785	26762866	SinglePeak
chr1	26762902	26762983	DoubleWide
chr1	26763244	26763325	SinglePeak
chr1	26763458	26763539	DoubleWide
chr1	26766144	26766225	DoubleWide
chr1	26766381	26766462	DoubleWide
chr1	26766551	26766632	DoubleWide
chr1	26767269	26767350	SinglePeak
chr1	26767730	26767811	SinglePeak
chr1	26771042	26771123	DoubleWide
chr1	26772408	26772489	SinglePeak
chr1	26772756	26772837	SinglePeak
chr1	26773152	26773233	SinglePeak
chr1	26773528	26773609	SinglePeak
chr1	26773747	26773828	SinglePeak
chr1	26773960	26774041	SinglePeak
chr1	26774088	26774169	SinglePeak
chr1	26774236	26774317	SinglePeak
chr1	26775220	26775301	SinglePeak
chr1	26775700	26775781	SinglePeak
chr1	26776252	26776333	SinglePeak
chr1	26778952	26779033	DoubleWide
chr1	26790664	26790745	SinglePeak
chr1	26853475	26853556	SinglePeak
chr1	26924002	26924083	SinglePeak
chr1	26942799	26942880	DoubleNarrow
chr1	26945125	26945206	DoubleWide
chr1	26945316	26945397	DoubleWide
chr1	26946043	26946124	SinglePeak
chr1	27304944	27305025	SinglePeak
chr1	27325259	27325340	SinglePeak
chr1	27330618	27330699	SinglePeak
chr1	27330794	27330875	SinglePeak
chr1	27331996	27332077	DoubleWide
chr1	27332168	27332249	Rest
chr1	27333902	27333983	SinglePeak
chr1	27351177	27351258	SinglePeak
chr1	27760425	27760506	DoubleWide
chr1	27789503	27789584	SinglePeak
chr1	27789618	27789699	SinglePeak
chr1	27793223	27793304	SinglePeak
chr1	27793463	27793544	DoubleWide
chr1	27810163	27810244	DoubleNarrow
chr1	27812072	27812153	SinglePeak
chr1	27817901	27817982	SinglePeak
chr1	27819596	27819677	SinglePeak
chr1	27834473	27834554	Rest
chr1	27841224	27841305	SinglePeak
chr1	27843104	27843185	DoubleWide
chr1	27847087	27847168	SinglePeak
chr1	28237744	28237825	SinglePeak
chr1	28268702	28268783	SinglePeak
chr1	28269096	28269177	SinglePeak
chr1	28269304	28269385	SinglePeak
chr1	28269383	28269464	SinglePeak
chr1	28269466	28269547	SinglePeak
chr1	28271512	28271593	SinglePeak
chr1	28271576	28271657	SinglePeak
chr1	28272782	28272863	DoubleNarrow
chr1	28273508	28273589	SinglePeak
chr1	28273959	28274040	DoubleWide
chr1	28274730	28274811	SinglePeak
chr1	28279008	28279089	DoubleNarrow
chr1	28279520	28279601	SinglePeak
chr1	28279828	28279909	SinglePeak
chr1	28279965	28280046	SinglePeak
chr1	28280067	28280148	DoubleNarrow
chr1	28280168	28280249	SinglePeak
chr1	28280472	28280553	SinglePeak
chr1	28280640	28280721	DoubleWide
chr1	28457774	28457855	SinglePeak
chr1	28458984	28459065	SinglePeak
chr1	28460119	28460200	Rest
chr1	28465591	28465672	SinglePeak
chr1	28466314	28466395	SinglePeak
chr1	28473462	28473543	SinglePeak
chr1	28489073	28489154	SinglePeak
chr1	28489239	28489320	SinglePeak
chr1	28490860	28490941	DoubleWide
chr1	28491570	28491651	SinglePeak
chr1	28507498	28507579	SinglePeak
chr1	28508222	28508303	DoubleWide
chr1	28508874	28508955	SinglePeak
chr1	28509175	28509256	SinglePeak
chr1	28553393	28553474	SinglePeak
chr1	28559804	28559885	SinglePeak
chr1	28560781	28560862	DoubleNarrow
chr1	28561291	28561372	SinglePeak
chr1	28564624	28564705	DoubleWide
chr1	28571106	28571187	DoubleWide
chr1	28571879	28571960	SinglePeak
chr1	28577429	28577510	DoubleWide
chr1	28683498	28683579	SinglePeak
chr1	28691529	28691610	SinglePeak
chr1	28737523	28737604	SinglePeak
chr1	28737888	28737969	DoubleWide
chr1	28738206	28738287	SinglePeak
chr1	28742016	28742097	SinglePeak
chr1	28742347	28742428	SinglePeak
chr1	28768873	28768954	SinglePeak
chr1	28887886	28887967	SinglePeak
chr1	28893503	28893584	SinglePeak
chr1	28893567	28893648	SinglePeak
chr1	28893704	28893785	DoubleWide
chr1	28893985	28894066	SinglePeak
chr1	28993241	28993322	SinglePeak
chr1	29011778	29011859	SinglePeak
chr1	29011901	29011982	SinglePeak
chr1	29015598	29015679	DoubleNarrow
chr1	29018151	29018232	DoubleWide
chr1	29030322	29030403	DoubleWide
chr1	29033022	29033103	DoubleWide
chr1	29033217	29033298	DoubleNarrow
chr1	29035747	29035828	DoubleWide
chr1	29039177	29039258	DoubleWide
chr1	29053031	29053112	DoubleWide
chr1	29053326	29053407	DoubleWide
chr1	29055257	29055338	SinglePeak
chr1	29055342	29055423	DoubleNarrow
chr1	29055447	29055528	SinglePeak
chr1	29058312	29058393	SinglePeak
chr1	29058389	29058470	DoubleWide
chr1	29058510	29058591	DoubleWide
chr1	29058664	29058745	DoubleWide
chr1	29058749	29058830	SinglePeak
chr1	29058844	29058925	DoubleWide
chr1	29060199	29060280	SinglePeak
chr1	29060342	29060423	SinglePeak
chr1	29062701	29062782	SinglePeak
chr1	29062889	29062970	SinglePeak
chr1	29063573	29063654	SinglePeak
chr1	29064689	29064770	SinglePeak
chr1	29064758	29064839	SinglePeak
chr1	29064898	29064979	DoubleWide
chr1	29065167	29065248	SinglePeak
chr1	29097253	29097334	DoubleWide
chr1	29097734	29097815	DoubleWide
chr1	29112277	29112358	DoubleNarrow
chr1	29115622	29115703	DoubleWide
chr1	29116126	29116207	SinglePeak
chr1	29116426	29116507	SinglePeak
chr1	29116572	29116653	SinglePeak
chr1	29116735	29116816	SinglePeak
chr1	31309951	31310032	DoubleNarrow
chr1	31318207	31318288	SinglePeak
chr1	31319029	31319110	DoubleWide
chr1	31348772	31348853	DoubleNarrow
chr1	32030203	32030284	SinglePeak
chr1	32030418	32030499	SinglePeak
chr1	32031438	32031519	SinglePeak
chr1	32031823	32031904	SinglePeak
chr1	32032545	32032626	SinglePeak
chr1	32033117	32033198	DoubleWide
chr1	32033438	32033519	SinglePeak
chr1	32035865	32035946	SinglePeak
chr1	32036835	32036916	DoubleWide
chr1	32038165	32038246	DoubleWide
chr1	32038471	32038552	DoubleWide
chr1	32038611	32038692	DoubleNarrow
chr1	32038688	32038769	SinglePeak
chr1	32038981	32039062	SinglePeak
chr1	32039168	32039249	SinglePeak
chr1	32039272	32039353	SinglePeak
chr1	32039448	32039529	DoubleWide
chr1	32039540	32039621	SinglePeak
chr1	32039840	32039921	SinglePeak
chr1	32042267	32042348	SinglePeak
chr1	32042451	32042532	DoubleWide
chr1	32095563	32095644	SinglePeak
chr1	32154536	32154617	SinglePeak
chr1	32156756	32156837	SinglePeak
chr1	32157277	32157358	DoubleWide
chr1	32157455	32157536	SinglePeak
chr1	32159516	32159597	SinglePeak
chr1	32160478	32160559	SinglePeak
chr1	32161866	32161947	DoubleWide
chr1	32162297	32162378	DoubleNarrow
chr1	32166049	32166130	SinglePeak
chr1	32170622	32170703	DoubleWide
chr1	32186888	32186969	SinglePeak
chr1	32187880	32187961	DoubleWide
chr1	32190287	32190368	SinglePeak
chr1	32192449	32192530	DoubleWide
chr1	32192599	32192680	SinglePeak
chr1	32192719	32192800	Rest
chr1	32193496	32193577	DoubleWide
chr1	32193831	32193912	SinglePeak
chr1	32193980	32194061	DoubleWide
chr1	32194524	32194605	SinglePeak
chr1	32194678	32194759	SinglePeak
chr1	32194834	32194915	DoubleWide
chr1	32222461	32222542	DoubleWide
chr1	32224347	32224428	DoubleWide
chr1	32226318	32226399	Rest
chr1	32229235	32229316	SinglePeak
chr1	32231025	32231106	DoubleNarrow
chr1	32324425	32324506	SinglePeak
chr1	32326859	32326940	DoubleWide
chr1	32327094	32327175	DoubleNarrow
chr1	32327484	32327565	SinglePeak
chr1	32327650	32327731	SinglePeak
chr1	32327975	32328056	SinglePeak
chr1	32328288	32328369	SinglePeak
chr1	32328595	32328676	DoubleWide
chr1	32329000	32329081	DoubleWide
chr1	32329163	32329244	SinglePeak
chr1	32329297	32329378	SinglePeak
chr1	32329491	32329572	SinglePeak
chr1	32329666	32329747	SinglePeak
chr1	32329945	32330026	SinglePeak
chr1	32330511	32330592	DoubleWide
chr1	32331399	32331480	DoubleWide
chr1	32352621	32352702	SinglePeak
chr1	32353361	32353442	SinglePeak
chr1	32651840	32651921	SinglePeak
chr1	32657339	32657420	SinglePeak
chr1	32668118	32668199	SinglePeak
chr1	32668370	32668451	SinglePeak
chr1	32668895	32668976	DoubleWide
chr1	32669177	32669258	SinglePeak
chr1	32669410	32669491	DoubleWide
chr1	32672367	32672448	DoubleNarrow
chr1	32672562	32672643	DoubleWide
chr1	32672702	32672783	DoubleNarrow
chr1	32672906	32672987	DoubleWide
chr1	32673120	32673201	SinglePeak
chr1	32679430	32679511	DoubleWide
chr1	32679585	32679666	DoubleNarrow
chr1	32680069	32680150	SinglePeak
chr1	32680330	32680411	DoubleNarrow
chr1	32680439	32680520	SinglePeak
chr1	32769609	32769690	SinglePeak
chr1	32772808	32772889	SinglePeak
chr1	32818448	32818529	DoubleWide
chr1	32825238	32825319	DoubleWide
chr1	32826008	32826089	SinglePeak
chr1	32833975	32834056	DoubleNarrow
chr1	32834771	32834852	SinglePeak
chr1	32847594	32847675	DoubleWide
chr1	32852992	32853073	DoubleNarrow
chr1	35080652	35080733	Rest
chr1	35093815	35093896	SinglePeak
chr1	35094070	35094151	SinglePeak
chr1	35095761	35095842	SinglePeak
chr1	35095879	35095960	SinglePeak
chr1	35095953	35096034	SinglePeak
chr1	35097250	35097331	SinglePeak
chr1	35104204	35104285	SinglePeak
chr1	35104502	35104583	DoubleNarrow
chr1	35111997	35112078	SinglePeak
chr1	35295854	35295935	DoubleWide
chr1	35358856	35358937	DoubleWide
chr1	35359534	35359615	SinglePeak
chr1	35360917	35360998	SinglePeak
chr1	35361013	35361094	SinglePeak
chr1	35361116	35361197	DoubleWide
chr1	35361554	35361635	DoubleWide
chr1	35361780	35361861	SinglePeak
chr1	35369975	35370056	SinglePeak
chr1	35370251	35370332	SinglePeak
chr1	35370325	35370406	SinglePeak
chr1	35385366	35385447	DoubleWide
chr1	35385998	35386079	DoubleWide
chr1	35386939	35387020	SinglePeak
chr1	35387300	35387381	SinglePeak
chr1	35387923	35388004	SinglePeak
chr1	35388855	35388936	DoubleNarrow
chr1	35392130	35392211	DoubleWide
chr1	35392672	35392753	DoubleWide
chr1	35392833	35392914	SinglePeak
chr1	35393024	35393105	SinglePeak
chr1	35393284	35393365	DoubleWide
chr1	35393517	35393598	DoubleWide
chr1	35393733	35393814	SinglePeak
chr1	35396445	35396526	SinglePeak
chr1	35398453	35398534	SinglePeak
chr1	35399036	35399117	SinglePeak
chr1	35399386	35399467	SinglePeak
chr1	35404947	35405028	DoubleWide
chr1	35405295	35405376	DoubleWide
chr1	35405643	35405724	SinglePeak
chr1	35413895	35413976	DoubleWide
chr1	35415366	35415447	SinglePeak
chr1	35418362	35418443	DoubleWide
chr1	35419385	35419466	DoubleWide
chr1	35559022	35559103	SinglePeak
chr1	35563714	35563795	SinglePeak
chr1	35822771	35822852	DoubleNarrow
chr1	35825840	35825921	DoubleNarrow
chr1	35826671	35826752	DoubleWide
chr1	35831719	35831800	SinglePeak
chr1	35850102	35850183	SinglePeak
chr1	35851047	35851128	SinglePeak
chr1	35888356	35888437	DoubleWide
chr1	35893023	35893104	DoubleWide
chr1	35893978	35894059	SinglePeak
chr1	35901242	35901323	SinglePeak
chr1	35901386	35901467	SinglePeak
chr1	35901895	35901976	SinglePeak
chr1	35902111	35902192	SinglePeak
chr1	35902642	35902723	Rest
chr1	35902992	35903073	SinglePeak
chr1	35906853	35906934	DoubleWide
chr1	35913767	35913848	DoubleWide
chr1	35914104	35914185	DoubleWide
chr1	35917541	35917622	SinglePeak
chr1	35945633	35945714	DoubleNarrow
chr1	35966865	35966946	DoubleNarrow
chr1	35970188	35970269	SinglePeak
chr1	35971951	35972032	DoubleWide
chr1	35982535	35982616	DoubleNarrow
chr1	35984388	35984469	SinglePeak
chr1	36004268	36004349	DoubleWide
chr1	36005632	36005713	SinglePeak
chr1	36008618	36008699	DoubleWide
chr1	36008824	36008905	DoubleWide
chr1	36009050	36009131	SinglePeak
chr1	36009419	36009500	SinglePeak
chr1	36013565	36013646	DoubleWide
chr1	36013831	36013912	SinglePeak
chr1	36034088	36034169	SinglePeak
chr1	36034328	36034409	SinglePeak
chr1	36036120	36036201	SinglePeak
chr1	36039734	36039815	Rest
chr1	36040212	36040293	SinglePeak
chr1	36043363	36043444	DoubleWide
chr1	36091826	36091907	SinglePeak
chr1	36172378	36172459	SinglePeak
chr1	36176124	36176205	DoubleWide
chr1	36176846	36176927	SinglePeak
chr1	36177777	36177858	SinglePeak
chr1	36179170	36179251	SinglePeak
chr1	36180151	36180232	SinglePeak
chr1	36282438	36282519	SinglePeak
chr1	36284896	36284977	SinglePeak
chr1	36286313	36286394	DoubleNarrow
chr1	36287273	36287354	DoubleWide
chr1	36287986	36288067	SinglePeak
chr1	36288137	36288218	SinglePeak
chr1	36288251	36288332	SinglePeak
chr1	36288360	36288441	DoubleNarrow
chr1	36288473	36288554	DoubleWide
chr1	36288560	36288641	SinglePeak
chr1	36288724	36288805	SinglePeak
chr1	36288985	36289066	DoubleWide
chr1	36291298	36291379	DoubleWide
chr1	36292542	36292623	SinglePeak
chr1	36293779	36293860	DoubleWide
chr1	36294186	36294267	DoubleNarrow
chr1	36296514	36296595	Rest
chr1	36301044	36301125	SinglePeak
chr1	36301455	36301536	SinglePeak
chr1	36307682	36307763	SinglePeak
chr1	36321635	36321716	SinglePeak
chr1	37475371	37475452	SinglePeak
chr1	37480128	37480209	SinglePeak
chr1	37695842	37695923	DoubleWide
chr1	37695930	37696011	SinglePeak
chr1	37698854	37698935	SinglePeak
chr1	37698947	37699028	SinglePeak
chr1	37700351	37700432	SinglePeak
chr1	37700513	37700594	SinglePeak
chr1	37701669	37701750	DoubleNarrow
chr1	37701808	37701889	DoubleNarrow
chr1	37703161	37703242	SinglePeak
chr1	37705355	37705436	DoubleNarrow
chr1	37808451	37808532	DoubleWide
chr1	38016282	38016363	DoubleWide
chr1	38016421	38016502	SinglePeak
chr1	38017586	38017667	DoubleNarrow
chr1	38018567	38018648	DoubleNarrow
chr1	38019460	38019541	SinglePeak
chr1	38022347	38022428	SinglePeak
chr1	38022626	38022707	DoubleWide
chr1	38022809	38022890	DoubleNarrow
chr1	38023470	38023551	DoubleWide
chr1	38998123	38998204	SinglePeak
chr1	39000920	39001001	SinglePeak
chr1	39003254	39003335	SinglePeak
chr1	39003405	39003486	SinglePeak
chr1	39003989	39004070	DoubleNarrow
chr1	39034312	39034393	SinglePeak
chr1	39283141	39283222	SinglePeak
chr1	39283329	39283410	DoubleWide
chr1	39283989	39284070	DoubleWide
chr1	39284266	39284347	DoubleWide
chr1	39284422	39284503	SinglePeak
chr1	39285014	39285095	SinglePeak
chr1	39285205	39285286	SinglePeak
chr1	39285472	39285553	SinglePeak
chr1	39291817	39291898	SinglePeak
chr1	39293385	39293466	DoubleWide
chr1	39294950	39295031	SinglePeak
chr1	39316302	39316383	SinglePeak
chr1	39322524	39322605	Rest
chr1	39324104	39324185	SinglePeak
chr1	39331078	39331159	DoubleNarrow
chr1	39331155	39331236	SinglePeak
chr1	39337128	39337209	SinglePeak
chr1	39340425	39340506	DoubleNarrow
chr1	39348444	39348525	DoubleWide
chr1	39348660	39348741	SinglePeak
chr1	39349404	39349485	DoubleWide
chr1	39357296	39357377	DoubleWide
chr1	39368316	39368397	SinglePeak
chr1	39372386	39372467	SinglePeak
chr1	39378511	39378592	SinglePeak
chr1	39380193	39380274	SinglePeak
chr1	39422637	39422718	SinglePeak
chr1	39423938	39424019	DoubleNarrow
chr1	39424191	39424272	SinglePeak
chr1	39424468	39424549	SinglePeak
chr1	39427300	39427381	SinglePeak
chr1	39427371	39427452	DoubleNarrow
chr1	39427908	39427989	DoubleWide
chr1	39428329	39428410	SinglePeak
chr1	39429153	39429234	DoubleNarrow
chr1	39429740	39429821	SinglePeak
chr1	39430619	39430700	SinglePeak
chr1	39430897	39430978	SinglePeak
chr1	39432456	39432537	DoubleWide
chr1	39432841	39432922	SinglePeak
chr1	39432976	39433057	SinglePeak
chr1	39434337	39434418	DoubleWide
chr1	39434615	39434696	Rest
chr1	39436310	39436391	SinglePeak
chr1	39439876	39439957	SinglePeak
chr1	39441152	39441233	DoubleWide
chr1	39441338	39441419	SinglePeak
chr1	39441879	39441960	DoubleWide
chr1	39442080	39442161	DoubleWide
chr1	39442332	39442413	DoubleWide
chr1	39443372	39443453	DoubleWide
chr1	39444571	39444652	SinglePeak
chr1	39444970	39445051	SinglePeak
chr1	39447942	39448023	SinglePeak
chr1	39451516	39451597	SinglePeak
chr1	39452371	39452452	SinglePeak
chr1	39452605	39452686	DoubleWide
chr1	39458312	39458393	SinglePeak
chr1	39458509	39458590	SinglePeak
chr1	39458599	39458680	SinglePeak
chr1	39458676	39458757	SinglePeak
chr1	39458780	39458861	SinglePeak
chr1	39459009	39459090	DoubleWide
chr1	39459252	39459333	SinglePeak
chr1	39460542	39460623	SinglePeak
chr1	39463691	39463772	DoubleWide
chr1	39465007	39465088	SinglePeak
chr1	39467898	39467979	SinglePeak
chr1	39468045	39468126	SinglePeak
chr1	39468542	39468623	DoubleWide
chr1	39469377	39469458	SinglePeak
chr1	39479746	39479827	SinglePeak
chr1	39479989	39480070	DoubleNarrow
chr1	39482500	39482581	SinglePeak
chr1	39484546	39484627	DoubleNarrow
chr1	39485463	39485544	DoubleWide
chr1	39741919	39742000	SinglePeak
chr1	39743130	39743211	SinglePeak
chr1	39743316	39743397	SinglePeak
chr1	39743730	39743811	SinglePeak
chr1	39747907	39747988	SinglePeak
chr1	39748826	39748907	DoubleWide
chr1	40059261	40059342	DoubleWide
chr1	40059462	40059543	DoubleWide
chr1	40059992	40060073	DoubleWide
chr1	40060159	40060240	SinglePeak
chr1	40060671	40060752	SinglePeak
chr1	40061648	40061729	SinglePeak
chr1	40061851	40061932	SinglePeak
chr1	40064154	40064235	DoubleWide
chr1	40064548	40064629	DoubleNarrow
chr1	40066159	40066240	SinglePeak
chr1	40067467	40067548	DoubleWide
chr1	40069599	40069680	SinglePeak
chr1	40070064	40070145	SinglePeak
chr1	40070359	40070440	DoubleWide
chr1	40070491	40070572	DoubleNarrow
chr1	40070763	40070844	DoubleWide
chr1	40071016	40071097	SinglePeak
chr1	40071380	40071461	DoubleWide
chr1	40189000	40189081	SinglePeak
chr1	40190701	40190782	DoubleWide
chr1	40190832	40190913	DoubleNarrow
chr1	40195572	40195653	DoubleNarrow
chr1	40201837	40201918	SinglePeak
chr1	40202351	40202432	SinglePeak
chr1	40222503	40222584	DoubleWide
chr1	40231469	40231550	SinglePeak
chr1	40235729	40235810	SinglePeak
chr1	40267700	40267781	SinglePeak
chr1	40269876	40269957	SinglePeak
chr1	40270104	40270185	SinglePeak
chr1	40271823	40271904	DoubleWide
chr1	40406643	40406724	DoubleNarrow
chr1	40408558	40408639	SinglePeak
chr1	40409074	40409155	SinglePeak
chr1	40412691	40412772	SinglePeak
chr1	40412930	40413011	DoubleWide
chr1	40413112	40413193	SinglePeak
chr1	40413265	40413346	SinglePeak
chr1	40414100	40414181	DoubleNarrow
chr1	40415202	40415283	DoubleWide
chr1	40415904	40415985	SinglePeak
chr1	40416112	40416193	DoubleWide
chr1	40416707	40416788	SinglePeak
chr1	40417097	40417178	DoubleWide
chr1	40417201	40417282	SinglePeak
chr1	40457286	40457367	SinglePeak
chr1	40533038	40533119	SinglePeak
chr1	40738784	40738865	SinglePeak
chr1	40738941	40739022	SinglePeak
chr1	40753097	40753178	SinglePeak
chr1	40757910	40757991	SinglePeak
chr1	40758067	40758148	SinglePeak
chr1	40762792	40762873	SinglePeak
chr1	40766533	40766614	SinglePeak
chr1	40769092	40769173	SinglePeak
chr1	40769305	40769386	SinglePeak
chr1	40769448	40769529	SinglePeak
chr1	40769545	40769626	SinglePeak
chr1	40769853	40769934	SinglePeak
chr1	40830983	40831064	SinglePeak
chr1	40983185	40983266	SinglePeak
chr1	40987277	40987358	SinglePeak
chr1	40991076	40991157	SinglePeak
chr1	40991243	40991324	SinglePeak
chr1	40991688	40991769	DoubleNarrow
chr1	40991836	40991917	SinglePeak
chr1	40995862	40995943	SinglePeak
chr1	40997100	40997181	DoubleNarrow
chr1	40997314	40997395	DoubleWide
chr1	41000940	41001021	DoubleWide
chr1	41005996	41006077	SinglePeak
chr1	41006264	41006345	SinglePeak
chr1	41007352	41007433	SinglePeak
chr1	41007599	41007680	SinglePeak
chr1	41008568	41008649	SinglePeak
chr1	41008717	41008798	DoubleWide
chr1	41008869	41008950	SinglePeak
chr1	41010226	41010307	SinglePeak
chr1	41011582	41011663	DoubleWide
chr1	42457158	42457239	SinglePeak
chr1	42659176	42659257	DoubleNarrow
chr1	42660901	42660982	SinglePeak
chr1	42664770	42664851	SinglePeak
chr1	42665886	42665967	SinglePeak
chr1	42666569	42666650	DoubleNarrow
chr1	42667298	42667379	SinglePeak
chr1	42667411	42667492	SinglePeak
chr1	42667534	42667615	SinglePeak
chr1	42668147	42668228	DoubleNarrow
chr1	42676498	42676579	DoubleNarrow
chr1	42683350	42683431	SinglePeak
chr1	42693242	42693323	SinglePeak
chr1	42693410	42693491	DoubleNarrow
chr1	42693557	42693638	SinglePeak
chr1	42696138	42696219	SinglePeak
chr1	42696277	42696358	DoubleWide
chr1	42696566	42696647	SinglePeak
chr1	42697107	42697188	DoubleWide
chr1	42697249	42697330	DoubleNarrow
chr1	42697330	42697411	SinglePeak
chr1	42697464	42697545	DoubleWide
chr1	42697639	42697720	SinglePeak
chr1	42700710	42700791	DoubleWide
chr1	42701061	42701142	DoubleNarrow
chr1	42701925	42702006	SinglePeak
chr1	42828010	42828091	SinglePeak
chr1	42830342	42830423	SinglePeak
chr1	42830508	42830589	DoubleNarrow
chr1	42830692	42830773	DoubleWide
chr1	42831105	42831186	SinglePeak
chr1	42831184	42831265	SinglePeak
chr1	42834985	42835066	Rest
chr1	42835774	42835855	SinglePeak
chr1	42836098	42836179	DoubleWide
chr1	42837085	42837166	DoubleWide
chr1	42837199	42837280	DoubleNarrow
chr1	42838867	42838948	DoubleWide
chr1	42839155	42839236	SinglePeak
chr1	42839366	42839447	SinglePeak
chr1	42839965	42840046	DoubleWide
chr1	42840078	42840159	DoubleWide
chr1	42840181	42840262	SinglePeak
chr1	42840344	42840425	DoubleWide
chr1	42841043	42841124	DoubleNarrow
chr1	42842434	42842515	DoubleNarrow
chr1	42849202	42849283	SinglePeak
chr1	43359115	43359196	SinglePeak
chr1	43359394	43359475	Rest
chr1	43360408	43360489	SinglePeak
chr1	43360662	43360743	DoubleWide
chr1	43361048	43361129	DoubleWide
chr1	43362109	43362190	SinglePeak
chr1	43362856	43362937	DoubleNarrow
chr1	43404290	43404371	DoubleWide
chr1	43422386	43422467	SinglePeak
chr1	43422680	43422761	DoubleNarrow
chr1	43424697	43424778	SinglePeak
chr1	43426984	43427065	DoubleWide
chr1	43427478	43427559	SinglePeak
chr1	43431085	43431166	SinglePeak
chr1	43431189	43431270	DoubleWide
chr1	43431373	43431454	DoubleNarrow
chr1	43432433	43432514	SinglePeak
chr1	43435113	43435194	SinglePeak
chr1	43439519	43439600	SinglePeak
chr1	43441128	43441209	SinglePeak
chr1	43446857	43446938	SinglePeak
chr1	43958167	43958248	DoubleWide
chr1	43958299	43958380	SinglePeak
chr1	43960026	43960107	SinglePeak
chr1	43960159	43960240	SinglePeak
chr1	43960822	43960903	SinglePeak
chr1	43966635	43966716	SinglePeak
chr1	43970508	43970589	SinglePeak
chr1	43971194	43971275	SinglePeak
chr1	43971300	43971381	DoubleNarrow
chr1	43972096	43972177	SinglePeak
chr1	43972328	43972409	SinglePeak
chr1	43975351	43975432	SinglePeak
chr1	43975568	43975649	SinglePeak
chr1	43975737	43975818	SinglePeak
chr1	43975865	43975946	DoubleNarrow
chr1	43976489	43976570	DoubleWide
chr1	43976717	43976798	SinglePeak
chr1	43976822	43976903	SinglePeak
chr1	43976934	43977015	SinglePeak
chr1	43977910	43977991	DoubleWide
chr1	43980123	43980204	SinglePeak
chr1	43981048	43981129	SinglePeak
chr1	43981598	43981679	SinglePeak
chr1	43984777	43984858	SinglePeak
chr1	43985426	43985507	SinglePeak
chr1	43990205	43990286	DoubleNarrow
chr1	44214610	44214691	SinglePeak
chr1	44214868	44214949	SinglePeak
chr1	44215215	44215296	SinglePeak
chr1	44218486	44218567	SinglePeak
chr1	44632274	44632355	DoubleNarrow
chr1	44635771	44635852	SinglePeak
chr1	44644144	44644225	SinglePeak
chr1	44644316	44644397	SinglePeak
chr1	44644614	44644695	Rest
chr1	44644787	44644868	SinglePeak
chr1	44645159	44645240	SinglePeak
chr1	44740783	44740864	SinglePeak
chr1	44740858	44740939	SinglePeak
chr1	44746959	44747040	SinglePeak
chr1	44747326	44747407	SinglePeak
chr1	44747561	44747642	SinglePeak
chr1	44747694	44747775	SinglePeak
chr1	44750345	44750426	DoubleWide
chr1	44750555	44750636	SinglePeak
chr1	44753263	44753344	SinglePeak
chr1	44753677	44753758	SinglePeak
chr1	44753823	44753904	SinglePeak
chr1	44753937	44754018	SinglePeak
chr1	44754105	44754186	SinglePeak
chr1	44754210	44754291	SinglePeak
chr1	44754598	44754679	SinglePeak
chr1	44754687	44754768	SinglePeak
chr1	44754831	44754912	SinglePeak
chr1	44754929	44755010	SinglePeak
chr1	44755093	44755174	SinglePeak
chr1	44755533	44755614	SinglePeak
chr1	44755843	44755924	DoubleWide
chr1	44755975	44756056	DoubleWide
chr1	44757639	44757720	SinglePeak
chr1	44757957	44758038	SinglePeak
chr1	44758147	44758228	SinglePeak
chr1	44760095	44760176	SinglePeak
chr1	44760228	44760309	SinglePeak
chr1	44760501	44760582	SinglePeak
chr1	44761089	44761170	SinglePeak
chr1	44761819	44761900	SinglePeak
chr1	44762158	44762239	DoubleWide
chr1	44762250	44762331	SinglePeak
chr1	44762487	44762568	DoubleNarrow
chr1	44766761	44766842	DoubleWide
chr1	44776417	44776498	DoubleNarrow
chr1	44776580	44776661	Rest
chr1	44777424	44777505	SinglePeak
chr1	44777543	44777624	DoubleWide
chr1	44777780	44777861	SinglePeak
chr1	44777935	44778016	DoubleWide
chr1	44778374	44778455	SinglePeak
chr1	44778502	44778583	DoubleWide
chr1	44801762	44801843	SinglePeak
chr1	44802661	44802742	SinglePeak
chr1	44802883	44802964	SinglePeak
chr1	44803547	44803628	SinglePeak
chr1	44804245	44804326	SinglePeak
chr1	44804552	44804633	SinglePeak
chr1	44812368	44812449	SinglePeak
chr1	44812907	44812988	DoubleNarrow
chr1	45013203	45013284	SinglePeak
chr1	45013284	45013365	DoubleNarrow
chr1	45013520	45013601	SinglePeak
chr1	45013830	45013911	DoubleWide
chr1	45014378	45014459	SinglePeak
chr1	45015054	45015135	DoubleWide
chr1	45340978	45341059	SinglePeak
chr1	45341318	45341399	SinglePeak
chr1	45341384	45341465	SinglePeak
chr1	45341670	45341751	SinglePeak
chr1	45341875	45341956	DoubleWide
chr1	45342647	45342728	SinglePeak
chr1	45552387	45552468	DoubleWide
chr1	45561690	45561771	SinglePeak
chr1	45567042	45567123	SinglePeak
chr1	45567895	45567976	DoubleWide
chr1	45568163	45568244	SinglePeak
chr1	45568703	45568784	SinglePeak
chr1	45568860	45568941	DoubleNarrow
chr1	45569003	45569084	SinglePeak
chr1	45591325	45591406	SinglePeak
chr1	45602180	45602261	DoubleWide
chr1	45604848	45604929	SinglePeak
chr1	45606597	45606678	SinglePeak
chr1	45606785	45606866	SinglePeak
chr1	45606913	45606994	DoubleWide
chr1	45607211	45607292	DoubleNarrow
chr1	45612876	45612957	SinglePeak
chr1	45613102	45613183	DoubleWide
chr1	45613247	45613328	DoubleNarrow
chr1	45613454	45613535	SinglePeak
chr1	45613626	45613707	SinglePeak
chr1	45613799	45613880	SinglePeak
chr1	45614018	45614099	DoubleWide
chr1	45614339	45614420	DoubleNarrow
chr1	45614513	45614594	SinglePeak
chr1	45614828	45614909	SinglePeak
chr1	45614937	45615018	DoubleWide
chr1	45615226	45615307	SinglePeak
chr1	45616274	45616355	DoubleWide
chr1	45616371	45616452	SinglePeak
chr1	45616539	45616620	SinglePeak
chr1	45616684	45616765	SinglePeak
chr1	45617374	45617455	SinglePeak
chr1	45690887	45690968	DoubleNarrow
chr1	45693129	45693210	DoubleWide
chr1	45824336	45824417	SinglePeak
chr1	45829341	45829422	SinglePeak
chr1	45959284	45959365	SinglePeak
chr1	45998036	45998117	SinglePeak
chr1	46002108	46002189	DoubleWide
chr1	46002238	46002319	SinglePeak
chr1	46002735	46002816	DoubleWide
chr1	46006145	46006226	SinglePeak
chr1	46008226	46008307	DoubleWide
chr1	46010635	46010716	SinglePeak
chr1	46025585	46025666	SinglePeak
chr1	46027656	46027737	DoubleWide
chr1	46029361	46029442	SinglePeak
chr1	46248299	46248380	SinglePeak
chr1	46258728	46258809	SinglePeak
chr1	46260150	46260231	DoubleWide
chr1	46260434	46260515	DoubleWide
chr1	46260602	46260683	SinglePeak
chr1	46261186	46261267	DoubleWide
chr1	46267367	46267448	SinglePeak
chr1	46267586	46267667	SinglePeak
chr1	46267850	46267931	SinglePeak
chr1	46268026	46268107	SinglePeak
chr1	46268563	46268644	SinglePeak
chr1	46269085	46269166	SinglePeak
chr1	46270356	46270437	SinglePeak
chr1	46270587	46270668	DoubleWide
chr1	46270848	46270929	SinglePeak
chr1	46272385	46272466	DoubleWide
chr1	46272614	46272695	DoubleWide
chr1	46273298	46273379	DoubleNarrow
chr1	46273481	46273562	SinglePeak
chr1	46274053	46274134	DoubleWide
chr1	46303808	46303889	SinglePeak
chr1	46303966	46304047	SinglePeak
chr1	46309031	46309112	DoubleWide
chr1	46309171	46309252	SinglePeak
chr1	46309281	46309362	DoubleNarrow
chr1	46309753	46309834	DoubleNarrow
chr1	46309849	46309930	SinglePeak
chr1	46309912	46309993	SinglePeak
chr1	46310073	46310154	DoubleWide
chr1	46310438	46310519	SinglePeak
chr1	46316494	46316575	SinglePeak
chr1	46352802	46352883	DoubleWide
chr1	46360566	46360647	SinglePeak
chr1	46360642	46360723	DoubleNarrow
chr1	46361476	46361557	SinglePeak
chr1	47368397	47368478	DoubleWide
chr1	47372902	47372983	SinglePeak
chr1	47374843	47374924	SinglePeak
chr1	47375118	47375199	DoubleWide
chr1	47375360	47375441	SinglePeak
chr1	47376627	47376708	DoubleWide
chr1	50973805	50973886	SinglePeak
chr1	51269895	51269976	DoubleNarrow
chr1	51651901	51651982	SinglePeak
chr1	51740039	51740120	SinglePeak
chr1	51745465	51745546	DoubleWide
chr1	51746618	51746699	SinglePeak
chr1	51746751	51746832	DoubleWide
chr1	51747574	51747655	SinglePeak
chr1	51748144	51748225	SinglePeak
chr1	51748318	51748399	SinglePeak
chr1	51748423	51748504	SinglePeak
chr1	51750059	51750140	DoubleNarrow
chr1	51750193	51750274	DoubleWide
chr1	51756244	51756325	DoubleWide
chr1	51756384	51756465	DoubleWide
chr1	51756512	51756593	SinglePeak
chr1	51756643	51756724	SinglePeak
chr1	51756742	51756823	SinglePeak
chr1	51757031	51757112	SinglePeak
chr1	51757166	51757247	SinglePeak
chr1	51759557	51759638	SinglePeak
chr1	51759674	51759755	DoubleNarrow
chr1	51759772	51759853	SinglePeak
chr1	51760142	51760223	SinglePeak
chr1	51760610	51760691	DoubleWide
chr1	51765744	51765825	DoubleWide
chr1	51772001	51772082	DoubleWide
chr1	51772522	51772603	DoubleNarrow
chr1	51772746	51772827	DoubleNarrow
chr1	51776744	51776825	DoubleNarrow
chr1	51776973	51777054	SinglePeak
chr1	51781075	51781156	SinglePeak
chr1	51783155	51783236	SinglePeak
chr1	51783324	51783405	SinglePeak
chr1	51783455	51783536	SinglePeak
chr1	51783633	51783714	SinglePeak
chr1	51783868	51783949	SinglePeak
chr1	51784387	51784468	SinglePeak
chr1	51784553	51784634	SinglePeak
chr1	51785734	51785815	DoubleWide
chr1	51785888	51785969	DoubleWide
chr1	51786067	51786148	SinglePeak
chr1	51787641	51787722	DoubleWide
chr1	52086027	52086108	DoubleNarrow
chr1	52086158	52086239	SinglePeak
chr1	52086641	52086722	DoubleWide
chr1	52278395	52278476	SinglePeak
chr1	52281582	52281663	DoubleWide
chr1	52303719	52303800	SinglePeak
chr1	52340038	52340119	SinglePeak
chr1	52405463	52405544	SinglePeak
chr1	52405584	52405665	SinglePeak
chr1	52408487	52408568	SinglePeak
chr1	52411193	52411274	SinglePeak
chr1	52412402	52412483	DoubleWide
chr1	52412665	52412746	SinglePeak
chr1	52413800	52413881	DoubleWide
chr1	52414014	52414095	SinglePeak
chr1	52414520	52414601	SinglePeak
chr1	52414688	52414769	DoubleWide
chr1	52415266	52415347	DoubleWide
chr1	52415368	52415449	DoubleNarrow
chr1	52416587	52416668	SinglePeak
chr1	52802003	52802084	SinglePeak
chr1	52813461	52813542	DoubleWide
chr1	53050539	53050620	DoubleWide
chr1	53213187	53213268	DoubleWide
chr1	53958061	53958142	SinglePeak
chr1	53962184	53962265	SinglePeak
chr1	53962407	53962488	SinglePeak
chr1	54209890	54209971	SinglePeak
chr1	54216065	54216146	DoubleWide
chr1	55051560	55051641	SinglePeak
chr1	55052180	55052261	DoubleWide
chr1	55052402	55052483	SinglePeak
chr1	55052554	55052635	SinglePeak
chr1	55055938	55056019	SinglePeak
chr1	55056844	55056925	SinglePeak
chr1	55057253	55057334	DoubleNarrow
chr1	55058674	55058755	SinglePeak
chr1	55059410	55059491	DoubleWide
chr1	55061221	55061302	SinglePeak
chr1	61132004	61132085	SinglePeak
chr1	61277431	61277512	SinglePeak
chr1	61352378	61352459	DoubleWide
chr1	61383152	61383233	SinglePeak
chr1	61455218	61455299	SinglePeak
chr1	62439706	62439787	DoubleNarrow
chr1	62441412	62441493	DoubleWide
chr1	62443108	62443189	SinglePeak
chr1	62447248	62447329	SinglePeak
chr1	62810406	62810487	DoubleWide
chr1	62833944	62834025	SinglePeak
chr1	62834115	62834196	SinglePeak
chr1	62841342	62841423	SinglePeak
chr1	62863898	62863979	SinglePeak
chr1	63404357	63404438	SinglePeak
chr1	63411829	63411910	DoubleWide
chr1	63413977	63414058	SinglePeak
chr1	63419260	63419341	SinglePeak
chr1	63428660	63428741	DoubleWide
chr1	63428849	63428930	DoubleWide
chr1	64802879	64802960	SinglePeak
chr1	64804902	64804983	DoubleNarrow
chr1	64812646	64812727	DoubleNarrow
chr1	65271998	65272079	DoubleWide
chr1	65272082	65272163	SinglePeak
chr1	65364535	65364616	SinglePeak
chr1	65379495	65379576	SinglePeak
chr1	65381743	65381824	DoubleWide
chr1	65381820	65381901	SinglePeak
chr1	65384110	65384191	Rest
chr1	65385623	65385704	SinglePeak
chr1	65389198	65389279	SinglePeak
chr1	65389491	65389572	SinglePeak
chr1	65392365	65392446	SinglePeak
chr1	65394808	65394889	SinglePeak
chr1	65398753	65398834	SinglePeak
chr1	65398863	65398944	DoubleNarrow
chr1	65401686	65401767	DoubleWide
chr1	65408570	65408651	DoubleWide
chr1	65412850	65412931	DoubleWide
chr1	65539275	65539356	SinglePeak
chr1	65565478	65565559	DoubleWide
chr1	65592602	65592683	SinglePeak
chr1	65596353	65596434	SinglePeak
chr1	65601754	65601835	SinglePeak
chr1	65601946	65602027	SinglePeak
chr1	65604321	65604402	SinglePeak
chr1	65604967	65605048	DoubleWide
chr1	65609857	65609938	SinglePeak
chr1	65615926	65616007	DoubleWide
chr1	65622814	65622895	SinglePeak
chr1	65622959	65623040	SinglePeak
chr1	66939982	66940063	DoubleWide
chr1	66946071	66946152	DoubleWide
chr1	66958001	66958082	SinglePeak
chr1	66958215	66958296	SinglePeak
chr1	66958775	66958856	DoubleWide
chr1	66959776	66959857	SinglePeak
chr1	66963150	66963231	SinglePeak
chr1	66970741	66970822	SinglePeak
chr1	66976540	66976621	SinglePeak
chr1	66981703	66981784	DoubleWide
chr1	66981904	66981985	SinglePeak
chr1	67236663	67236744	DoubleNarrow
chr1	67255765	67255846	DoubleWide
chr1	67379928	67380009	SinglePeak
chr1	67685532	67685613	SinglePeak
chr1	67686114	67686195	SinglePeak
chr1	67686267	67686348	DoubleNarrow
chr1	67687133	67687214	SinglePeak
chr1	67687488	67687569	SinglePeak
chr1	67687602	67687683	DoubleNarrow
chr1	70217758	70217839	SinglePeak
chr1	70221535	70221616	DoubleWide
chr1	70221864	70221945	SinglePeak
chr1	70221928	70222009	SinglePeak
chr1	70223602	70223683	SinglePeak
chr1	70223833	70223914	SinglePeak
chr1	70227906	70227987	SinglePeak
chr1	70228141	70228222	SinglePeak
chr1	70228343	70228424	DoubleWide
chr1	70228529	70228610	SinglePeak
chr1	70228637	70228718	DoubleWide
chr1	70228740	70228821	SinglePeak
chr1	70228816	70228897	SinglePeak
chr1	70228897	70228978	SinglePeak
chr1	70229126	70229207	DoubleWide
chr1	70229364	70229445	SinglePeak
chr1	70229638	70229719	SinglePeak
chr1	70229883	70229964	DoubleWide
chr1	70230041	70230122	DoubleWide
chr1	70230155	70230236	DoubleNarrow
chr1	70230443	70230524	SinglePeak
chr1	70230667	70230748	SinglePeak
chr1	70230824	70230905	SinglePeak
chr1	70231016	70231097	DoubleWide
chr1	70231171	70231252	SinglePeak
chr1	70231260	70231341	SinglePeak
chr1	70231357	70231438	DoubleNarrow
chr1	70231496	70231577	DoubleWide
chr1	70231629	70231710	SinglePeak
chr1	70231700	70231781	SinglePeak
chr1	70231788	70231869	DoubleWide
chr1	70232197	70232278	DoubleWide
chr1	70236924	70237005	SinglePeak
chr1	70244629	70244710	SinglePeak
chr1	70244809	70244890	SinglePeak
chr1	70246717	70246798	SinglePeak
chr1	70246902	70246983	SinglePeak
chr1	70249879	70249960	DoubleWide
chr1	70416019	70416100	DoubleWide
chr1	70417884	70417965	SinglePeak
chr1	70421456	70421537	SinglePeak
chr1	70421668	70421749	SinglePeak
chr1	70424212	70424293	DoubleWide
chr1	70424394	70424475	SinglePeak
chr1	70429710	70429791	SinglePeak
chr1	70429867	70429948	DoubleWide
chr1	70430262	70430343	SinglePeak
chr1	70432000	70432081	SinglePeak
chr1	70433757	70433838	DoubleWide
chr1	70433991	70434072	DoubleNarrow
chr1	70434175	70434256	SinglePeak
chr1	70434319	70434400	SinglePeak
chr1	70434561	70434642	DoubleNarrow
chr1	70434727	70434808	SinglePeak
chr1	70435037	70435118	Rest
chr1	70435165	70435246	SinglePeak
chr1	70438637	70438718	Rest
chr1	70439038	70439119	SinglePeak
chr1	74736453	74736534	SinglePeak
chr1	74748678	74748759	DoubleWide
chr1	75728468	75728549	SinglePeak
chr1	75732575	75732656	DoubleWide
chr1	75732766	75732847	SinglePeak
chr1	75732947	75733028	DoubleWide
chr1	75733433	75733514	SinglePeak
chr1	75733598	75733679	SinglePeak
chr1	75733970	75734051	SinglePeak
chr1	75734713	75734794	DoubleWide
chr1	75734857	75734938	SinglePeak
chr1	75739892	75739973	DoubleWide
chr1	75740100	75740181	SinglePeak
chr1	75745709	75745790	SinglePeak
chr1	75762600	75762681	DoubleNarrow
chr1	75787076	75787157	SinglePeak
chr1	75787207	75787288	SinglePeak
chr1	75787325	75787406	SinglePeak
chr1	75787445	75787526	DoubleNarrow
chr1	75787587	75787668	DoubleWide
chr1	75789064	75789145	SinglePeak
chr1	75789494	75789575	DoubleWide
chr1	75789901	75789982	SinglePeak
chr1	75790101	75790182	DoubleNarrow
chr1	75790246	75790327	SinglePeak
chr1	75790466	75790547	SinglePeak
chr1	75790592	75790673	DoubleNarrow
chr1	75790803	75790884	DoubleNarrow
chr1	75790927	75791008	SinglePeak
chr1	75791077	75791158	SinglePeak
chr1	75791208	75791289	DoubleWide
chr1	75791387	75791468	DoubleWide
chr1	75791567	75791648	SinglePeak
chr1	75791791	75791872	SinglePeak
chr1	75792313	75792394	SinglePeak
chr1	75794008	75794089	DoubleWide
chr1	75794228	75794309	SinglePeak
chr1	77783174	77783255	SinglePeak
chr1	77803181	77803262	SinglePeak
chr1	77815050	77815131	SinglePeak
chr1	77863794	77863875	DoubleNarrow
chr1	77874751	77874832	SinglePeak
chr1	84489541	84489622	SinglePeak
chr1	84490265	84490346	SinglePeak
chr1	84490458	84490539	SinglePeak
chr1	84495292	84495373	SinglePeak
chr1	86715639	86715720	SinglePeak
chr1	86719457	86719538	SinglePeak
chr1	86722467	86722548	DoubleWide
chr1	86734534	86734615	DoubleWide
chr1	86734992	86735073	SinglePeak
chr1	86743075	86743156	SinglePeak
chr1	87331893	87331974	DoubleNarrow
chr1	87339441	87339522	SinglePeak
chr1	87344716	87344797	DoubleWide
chr1	88740890	88740971	SinglePeak
chr1	88760130	88760211	SinglePeak
chr1	88770281	88770362	DoubleWide
chr1	88771170	88771251	SinglePeak
chr1	88771344	88771425	DoubleWide
chr1	88771584	88771665	DoubleWide
chr1	88784565	88784646	DoubleWide
chr1	88786014	88786095	SinglePeak
chr1	88804334	88804415	SinglePeak
chr1	88804756	88804837	SinglePeak
chr1	88805987	88806068	SinglePeak
chr1	88807227	88807308	SinglePeak
chr1	88807455	88807536	DoubleNarrow
chr1	88807605	88807686	DoubleWide
chr1	88807765	88807846	SinglePeak
chr1	88821981	88822062	SinglePeak
chr1	88828426	88828507	SinglePeak
chr1	88832663	88832744	DoubleWide
chr1	88832838	88832919	SinglePeak
chr1	88832901	88832982	SinglePeak
chr1	88833002	88833083	DoubleWide
chr1	89526888	89526969	DoubleWide
chr1	89549841	89549922	DoubleWide
chr1	89568189	89568270	SinglePeak
chr1	89568341	89568422	SinglePeak
chr1	89579520	89579601	DoubleWide
chr1	89998013	89998094	SinglePeak
chr1	89998135	89998216	SinglePeak
chr1	90004941	90005022	SinglePeak
chr1	90005056	90005137	DoubleWide
chr1	90007739	90007820	SinglePeak
chr1	90010008	90010089	DoubleNarrow
chr1	90010291	90010372	SinglePeak
chr1	90013068	90013149	SinglePeak
chr1	90017243	90017324	DoubleWide
chr1	90022181	90022262	DoubleWide
chr1	90022311	90022392	SinglePeak
chr1	90027224	90027305	SinglePeak
chr1	91501558	91501639	SinglePeak
chr1	91501830	91501911	SinglePeak
chr1	91507774	91507855	DoubleWide
chr1	91508173	91508254	DoubleNarrow
chr1	91511682	91511763	SinglePeak
chr1	91511924	91512005	SinglePeak
chr1	91512985	91513066	DoubleWide
chr1	91515697	91515778	SinglePeak
chr1	91520066	91520147	SinglePeak
chr1	92333283	92333364	SinglePeak
chr1	92345789	92345870	SinglePeak
chr1	92345892	92345973	SinglePeak
chr1	92380633	92380714	SinglePeak
chr1	92833317	92833398	DoubleWide
chr1	92833463	92833544	DoubleWide
chr1	92833647	92833728	SinglePeak
chr1	92833746	92833827	DoubleNarrow
chr1	92834709	92834790	DoubleWide
chr1	92835831	92835912	SinglePeak
chr1	92836402	92836483	SinglePeak
chr1	92837385	92837466	DoubleWide
chr1	92837655	92837736	SinglePeak
chr1	92837725	92837806	SinglePeak
chr1	92837887	92837968	SinglePeak
chr1	92840148	92840229	SinglePeak
chr1	92840500	92840581	SinglePeak
chr1	92840623	92840704	SinglePeak
chr1	92841673	92841754	DoubleNarrow
chr1	93110135	93110216	SinglePeak
chr1	93114633	93114714	DoubleNarrow
chr1	93114885	93114966	SinglePeak
chr1	93118275	93118356	DoubleWide
chr1	93119242	93119323	DoubleNarrow
chr1	93120454	93120535	SinglePeak
chr1	93127158	93127239	DoubleWide
chr1	93128669	93128750	SinglePeak
chr1	93129210	93129291	DoubleWide
chr1	93133631	93133712	DoubleWide
chr1	93133856	93133937	DoubleWide
chr1	93134019	93134100	DoubleWide
chr1	93134187	93134268	SinglePeak
chr1	93183482	93183563	SinglePeak
chr1	93183908	93183989	DoubleWide
chr1	93186245	93186326	SinglePeak
chr1	93192101	93192182	SinglePeak
chr1	93201807	93201888	DoubleWide
chr1	93214670	93214751	DoubleWide
chr1	93216575	93216656	SinglePeak
chr1	93221538	93221619	DoubleWide
chr1	93221786	93221867	DoubleWide
chr1	93221940	93222021	SinglePeak
chr1	93230709	93230790	SinglePeak
chr1	93232356	93232437	DoubleWide
chr1	93236152	93236233	SinglePeak
chr1	93246008	93246089	SinglePeak
chr1	93254397	93254478	Rest
chr1	93256248	93256329	SinglePeak
chr1	93544031	93544112	DoubleNarrow
chr1	93546744	93546825	SinglePeak
chr1	94458508	94458589	SinglePeak
chr1	94464681	94464762	SinglePeak
chr1	94478467	94478548	SinglePeak
chr1	94480362	94480443	SinglePeak
chr1	94483077	94483158	SinglePeak
chr1	94516988	94517069	SinglePeak
chr1	96723290	96723371	SinglePeak
chr1	96751339	96751420	Rest
chr1	96769626	96769707	DoubleWide
chr1	96770670	96770751	SinglePeak
chr1	96777513	96777594	DoubleWide
chr1	96777937	96778018	SinglePeak
chr1	96784986	96785067	DoubleWide
chr1	96785241	96785322	SinglePeak
chr1	96804739	96804820	DoubleWide
chr1	96805122	96805203	SinglePeak
chr1	96806776	96806857	DoubleWide
chr1	96812643	96812724	DoubleWide
chr1	96812943	96813024	DoubleWide
chr1	96813205	96813286	DoubleWide
chr1	99861455	99861536	SinglePeak
chr1	99862404	99862485	SinglePeak
chr1	99864330	99864411	SinglePeak
chr1	99874636	99874717	SinglePeak
chr1	99875053	99875134	SinglePeak
chr1	99875264	99875345	SinglePeak
chr1	99884477	99884558	SinglePeak
chr1	99915289	99915370	SinglePeak
chr1	99916314	99916395	SinglePeak
chr1	100006981	100007062	SinglePeak
chr1	100007142	100007223	SinglePeak
chr1	100009188	100009269	SinglePeak
chr1	100011289	100011370	DoubleWide
chr1	100015334	100015415	SinglePeak
chr1	100022317	100022398	SinglePeak
chr1	100049821	100049902	DoubleWide
chr1	100058572	100058653	SinglePeak
chr1	100067925	100068006	SinglePeak
chr1	100069535	100069616	DoubleWide
chr1	100076916	100076997	SinglePeak
chr1	100077094	100077175	DoubleWide
chr1	100077304	100077385	DoubleWide
chr1	100078369	100078450	DoubleWide
chr1	100078537	100078618	SinglePeak
chr1	100081951	100082032	SinglePeak
chr1	100136967	100137048	SinglePeak
chr1	100137165	100137246	SinglePeak
chr1	100139571	100139652	DoubleWide
chr1	100139698	100139779	SinglePeak
chr1	100140357	100140438	SinglePeak
chr1	100143051	100143132	SinglePeak
chr1	100143986	100144067	DoubleNarrow
chr1	100146477	100146558	SinglePeak
chr1	100147807	100147888	SinglePeak
chr1	100148331	100148412	DoubleNarrow
chr1	100148549	100148630	DoubleWide
chr1	100273322	100273403	DoubleWide
chr1	100274623	100274704	SinglePeak
chr1	100274752	100274833	DoubleWide
chr1	100275515	100275596	DoubleWide
chr1	100277173	100277254	DoubleNarrow
chr1	100285163	100285244	SinglePeak
chr1	100287214	100287295	DoubleWide
chr1	100289534	100289615	SinglePeak
chr1	100291318	100291399	DoubleNarrow
chr1	100353682	100353763	DoubleWide
chr1	100377448	100377529	SinglePeak
chr1	100390656	100390737	DoubleWide
chr1	100390808	100390889	SinglePeak
chr1	100424147	100424228	DoubleWide
chr1	100424336	100424417	SinglePeak
chr1	100439859	100439940	DoubleWide
chr1	100440291	100440372	DoubleNarrow
chr1	100442851	100442932	DoubleNarrow
chr1	100442990	100443071	DoubleWide
chr1	100455302	100455383	SinglePeak
chr1	100455460	100455541	SinglePeak
chr1	100467859	100467940	SinglePeak
chr1	100468233	100468314	SinglePeak
chr1	100494765	100494846	SinglePeak
chr1	100498012	100498093	DoubleWide
chr1	100896489	100896570	DoubleWide
chr1	100910987	100911068	DoubleWide
chr1	100911147	100911228	SinglePeak
chr1	100912009	100912090	SinglePeak
chr1	100913591	100913672	DoubleWide
chr1	100961750	100961831	DoubleWide
chr1	100965716	100965797	SinglePeak
chr1	100974754	100974835	DoubleNarrow
chr1	103534686	103534767	SinglePeak
chr1	103541259	103541340	SinglePeak
chr1	103543205	103543286	DoubleNarrow
chr1	103544853	103544934	SinglePeak
chr1	103546321	103546402	SinglePeak
chr1	103546889	103546970	SinglePeak
chr1	103550846	103550927	SinglePeak
chr1	103553177	103553258	SinglePeak
chr1	103553403	103553484	DoubleWide
chr1	103553579	103553660	SinglePeak
chr1	103553686	103553767	DoubleNarrow
chr1	108606149	108606230	DoubleWide
chr1	108606237	108606318	SinglePeak
chr1	108628083	108628164	SinglePeak
chr1	108695649	108695730	SinglePeak
chr1	108695755	108695836	DoubleNarrow
chr1	108695979	108696060	SinglePeak
chr1	108696191	108696272	DoubleNarrow
chr1	108696359	108696440	DoubleNarrow
chr1	108696503	108696584	SinglePeak
chr1	108696606	108696687	SinglePeak
chr1	108696677	108696758	SinglePeak
chr1	108697338	108697419	SinglePeak
chr1	108697514	108697595	SinglePeak
chr1	108697741	108697822	DoubleWide
chr1	108697870	108697951	DoubleWide
chr1	108698040	108698121	SinglePeak
chr1	108698112	108698193	SinglePeak
chr1	108698307	108698388	DoubleWide
chr1	108698525	108698606	DoubleWide
chr1	108752966	108753047	SinglePeak
chr1	108759909	108759990	DoubleWide
chr1	108772587	108772668	DoubleWide
chr1	108776237	108776318	SinglePeak
chr1	108782332	108782413	SinglePeak
chr1	108782556	108782637	SinglePeak
chr1	108794757	108794838	SinglePeak
chr1	108796180	108796261	SinglePeak
chr1	108796351	108796432	SinglePeak
chr1	108796563	108796644	SinglePeak
chr1	108798054	108798135	SinglePeak
chr1	108800295	108800376	SinglePeak
chr1	108898584	108898665	SinglePeak
chr1	108901696	108901777	SinglePeak
chr1	109214458	109214539	SinglePeak
chr1	109223889	109223970	SinglePeak
chr1	109228298	109228379	SinglePeak
chr1	109228443	109228524	SinglePeak
chr1	109230976	109231057	SinglePeak
chr1	109231077	109231158	SinglePeak
chr1	109231170	109231251	SinglePeak
chr1	109231557	109231638	DoubleWide
chr1	109231778	109231859	SinglePeak
chr1	109235126	109235207	SinglePeak
chr1	109235423	109235504	SinglePeak
chr1	109236307	109236388	Rest
chr1	109236542	109236623	SinglePeak
chr1	109236751	109236832	SinglePeak
chr1	109236932	109237013	SinglePeak
chr1	109237149	109237230	SinglePeak
chr1	109237367	109237448	SinglePeak
chr1	109261415	109261496	SinglePeak
chr1	109488004	109488085	SinglePeak
chr1	109489829	109489910	DoubleNarrow
chr1	109495660	109495741	SinglePeak
chr1	109573646	109573727	SinglePeak
chr1	109573806	109573887	DoubleNarrow
chr1	109586657	109586738	DoubleWide
chr1	109591961	109592042	DoubleWide
chr1	109592272	109592353	SinglePeak
chr1	109620707	109620788	SinglePeak
chr1	109621651	109621732	SinglePeak
chr1	109625212	109625293	SinglePeak
chr1	109626636	109626717	SinglePeak
chr1	109626907	109626988	DoubleWide
chr1	109627087	109627168	DoubleNarrow
chr1	109627321	109627402	SinglePeak
chr1	109628309	109628390	SinglePeak
chr1	109628531	109628612	DoubleWide
chr1	109628929	109629010	DoubleWide
chr1	109657158	109657239	SinglePeak
chr1	109925054	109925135	SinglePeak
chr1	110011540	110011621	SinglePeak
chr1	110012290	110012371	DoubleWide
chr1	110012482	110012563	SinglePeak
chr1	110012821	110012902	DoubleWide
chr1	110014864	110014945	SinglePeak
chr1	110016280	110016361	SinglePeak
chr1	110016447	110016528	SinglePeak
chr1	110016719	110016800	SinglePeak
chr1	110016799	110016880	SinglePeak
chr1	110016894	110016975	SinglePeak
chr1	110017420	110017501	DoubleWide
chr1	110017872	110017953	DoubleWide
chr1	110018004	110018085	SinglePeak
chr1	110018464	110018545	DoubleNarrow
chr1	110018802	110018883	DoubleWide
chr1	110019468	110019549	DoubleWide
chr1	110020845	110020926	SinglePeak
chr1	110021287	110021368	DoubleNarrow
chr1	110021582	110021663	SinglePeak
chr1	110037818	110037899	SinglePeak
chr1	110037960	110038041	DoubleNarrow
chr1	110038134	110038215	SinglePeak
chr1	110038748	110038829	SinglePeak
chr1	110039105	110039186	DoubleWide
chr1	110039694	110039775	SinglePeak
chr1	110039770	110039851	SinglePeak
chr1	110040551	110040632	DoubleNarrow
chr1	110041323	110041404	SinglePeak
chr1	110042636	110042717	SinglePeak
chr1	110042971	110043052	SinglePeak
chr1	110043846	110043927	SinglePeak
chr1	110044737	110044818	DoubleNarrow
chr1	110045115	110045196	SinglePeak
chr1	110046622	110046703	SinglePeak
chr1	110047440	110047521	DoubleWide
chr1	110047683	110047764	SinglePeak
chr1	110049004	110049085	SinglePeak
chr1	110049602	110049683	SinglePeak
chr1	110049809	110049890	SinglePeak
chr1	110346229	110346310	DoubleWide
chr1	110894868	110894949	DoubleWide
chr1	110896577	110896658	DoubleWide
chr1	110899052	110899133	DoubleWide
chr1	111147592	111147673	DoubleNarrow
chr1	111159320	111159401	SinglePeak
chr1	111173028	111173109	DoubleNarrow
chr1	111174215	111174296	SinglePeak
chr1	111174327	111174408	SinglePeak
chr1	111174798	111174879	DoubleWide
chr1	111178452	111178533	DoubleWide
chr1	111182107	111182188	DoubleWide
chr1	111182709	111182790	SinglePeak
chr1	111184103	111184184	SinglePeak
chr1	111454122	111454203	SinglePeak
chr1	111454431	111454512	SinglePeak
chr1	111456014	111456095	DoubleWide
chr1	111456539	111456620	SinglePeak
chr1	111459386	111459467	DoubleWide
chr1	111460828	111460909	SinglePeak
chr1	111697387	111697468	SinglePeak
chr1	111697505	111697586	SinglePeak
chr1	111703283	111703364	SinglePeak
chr1	111703464	111703545	SinglePeak
chr1	111704283	111704364	DoubleNarrow
chr1	111712331	111712412	DoubleNarrow
chr1	111759561	111759642	SinglePeak
chr1	111760375	111760456	SinglePeak
chr1	111760845	111760926	SinglePeak
chr1	111761168	111761249	SinglePeak
chr1	111761273	111761354	SinglePeak
chr1	111762822	111762903	SinglePeak
chr1	111762990	111763071	SinglePeak
chr1	112647137	112647218	DoubleWide
chr1	112649347	112649428	DoubleWide
chr1	112649439	112649520	SinglePeak
chr1	112650774	112650855	SinglePeak
chr1	112651689	112651770	SinglePeak
chr1	112652922	112653003	SinglePeak
chr1	112653464	112653545	SinglePeak
chr1	112653535	112653616	DoubleNarrow
chr1	112653633	112653714	SinglePeak
chr1	112653736	112653817	SinglePeak
chr1	112654405	112654486	DoubleWide
chr1	112654631	112654712	SinglePeak
chr1	112658947	112659028	DoubleWide
chr1	112659121	112659202	SinglePeak
chr1	112659250	112659331	SinglePeak
chr1	112659612	112659693	SinglePeak
chr1	112659780	112659861	SinglePeak
chr1	112660551	112660632	SinglePeak
chr1	112666988	112667069	SinglePeak
chr1	112669463	112669544	DoubleWide
chr1	112669912	112669993	SinglePeak
chr1	112688842	112688923	SinglePeak
chr1	112695285	112695366	SinglePeak
chr1	112696345	112696426	SinglePeak
chr1	112698592	112698673	Rest
chr1	112698919	112699000	SinglePeak
chr1	112699376	112699457	DoubleWide
chr1	112699614	112699695	DoubleWide
chr1	112699808	112699889	SinglePeak
chr1	112700007	112700088	SinglePeak
chr1	113090552	113090633	SinglePeak
chr1	113091229	113091310	DoubleNarrow
chr1	113091362	113091443	SinglePeak
chr1	113091981	113092062	SinglePeak
chr1	113093127	113093208	DoubleWide
chr1	113096365	113096446	SinglePeak
chr1	113097441	113097522	SinglePeak
chr1	113098624	113098705	DoubleWide
chr1	113100138	113100219	DoubleWide
chr1	113100323	113100404	SinglePeak
chr1	113100465	113100546	DoubleWide
chr1	113103538	113103619	DoubleWide
chr1	113103760	113103841	DoubleNarrow
chr1	113107509	113107590	DoubleWide
chr1	113107734	113107815	DoubleNarrow
chr1	113107965	113108046	SinglePeak
chr1	113110187	113110268	SinglePeak
chr1	113112383	113112464	SinglePeak
chr1	113114341	113114422	DoubleWide
chr1	113123790	113123871	DoubleNarrow
chr1	113671644	113671725	DoubleNarrow
chr1	113940300	113940381	SinglePeak
chr1	113952706	113952787	SinglePeak
chr1	113955645	113955726	SinglePeak
chr1	113957999	113958080	DoubleWide
chr1	113962226	113962307	SinglePeak
chr1	113962534	113962615	SinglePeak
chr1	113962696	113962777	SinglePeak
chr1	113963306	113963387	DoubleNarrow
chr1	113965957	113966038	SinglePeak
chr1	113966261	113966342	SinglePeak
chr1	113967693	113967774	DoubleWide
chr1	113969904	113969985	SinglePeak
chr1	115683865	115683946	DoubleWide
chr1	116384117	116384198	SinglePeak
chr1	116384711	116384792	DoubleWide
chr1	116384855	116384936	SinglePeak
chr1	116387199	116387280	SinglePeak
chr1	116387478	116387559	SinglePeak
chr1	116388063	116388144	DoubleWide
chr1	116388566	116388647	DoubleWide
chr1	116388841	116388922	DoubleNarrow
chr1	116388999	116389080	DoubleWide
chr1	116389759	116389840	DoubleNarrow
chr1	116389982	116390063	DoubleWide
chr1	116390145	116390226	DoubleWide
chr1	116390727	116390808	SinglePeak
chr1	116392768	116392849	DoubleNarrow
chr1	116393261	116393342	SinglePeak
chr1	116393444	116393525	DoubleWide
chr1	116393722	116393803	SinglePeak
chr1	116396531	116396612	DoubleWide
chr1	116397831	116397912	SinglePeak
chr1	116399339	116399420	DoubleWide
chr1	116403794	116403875	SinglePeak
chr1	116404361	116404442	Rest
chr1	116944627	116944708	SinglePeak
chr1	116961135	116961216	SinglePeak
chr1	117062295	117062376	DoubleNarrow
chr1	117062477	117062558	SinglePeak
chr1	117073705	117073786	SinglePeak
chr1	117076087	117076168	SinglePeak
chr1	117077856	117077937	DoubleNarrow
chr1	117081774	117081855	SinglePeak
chr1	117081922	117082003	SinglePeak
chr1	117083942	117084023	DoubleWide
[truncated: 54,227 more rows]

## Sheet: README
Supplemental Table S6. SF3B1 binding regions detected with the regions’ position and class.
